# Supplementary material for: Sexual Dimorphism of the Mouse Plasma Metabolome Is Associated with Phenotypes of 30 Gene Knockout Lines
Source: MDPI journal article supplement (doi:10.3390/metabo13080947), 2023-08-15
Supplement: s1 [file s1]

# *Supplementary Information* for

## **Sexual dimorphism of the mouse plasma metabolome is associated with phenotypes of 30 gene knockout lines**

**Ying Zhang<sup>1,2</sup>, Dinesh K. Barupal<sup>3</sup>, Sili Fan<sup>1</sup>, Bei Gao<sup>4</sup>, Chao Zhu<sup>5</sup>, Ann M. Flenniken<sup>6,7</sup>, Colin McKerlie<sup>6,8</sup>, Lauryl M. J. Nutter<sup>6,8</sup>, K. C. Kent Lloyd<sup>9</sup> and Oliver Fiehn<sup>1\*</sup>**

- 1 West Coast Metabolomics Center, University of California, Davis, Davis, CA 95616, United States
- 2 Department of Chemistry, University of California, Davis, Davis, CA 95616, United States
- 3 Department of Environmental Medicine and Public Health, Icahn School of Medicine at Mount Sinai, New York, NY 10029, United States; dinesh.barupal@mssm.edu
- 4 School of Marine Sciences, Nanjing University of Information Science and Technology, Nanjing, 210044, China
- 5 College of Medicine & Nursing, Dezhou University, De Zhou, Shandong 253023, China
- 6 The Centre for Phenogenomics, Toronto, ON M5T 3H7, Canada; flenniken@lunenfeld.ca (A.M.F.); colin.mckerlie@sickkids.ca (C.M.); lauryl.nutter@sickkids.ca (L.M.J.N.)
- 7 Lunenfeld-Tanenbaum Research Institute, Mount Sinai Hospital, Toronto, ON M5G 1X5, Canada
- 8 The Hospital for Sick Children, Toronto, ON M5G 1X8, Canada
- 9 Department of Surgery, School of Medicine, and Mouse Biology Program, University of California, Davis, Davis, CA 95616, United States; kclloyd@ucdavis.edu
- \* Correspondence: ofiehn@ucdavis.edu

### **Supplementary Tables:**

Supplementary Table S1. Gene information of 30 knockout lines

Supplementary Table S2. Number of significantly changed metabolites by genotype effect and their alterations in 30 knockout strains.

Supplementary Table S3. Examples of sexual dimorphism of phenotypes (continuous traits) in wildtype mice and their alterations in 30 knockout lines.

### **Supplementary Figures:**

Supplementary Figure S1. Statistical analysis designs to study sexual dimorphism in wildtype mice and in knockout mice.

Supplementary Figure S2. Sex as a biological variable in metabolomics data with a stricter significance threshold and adjusted to body mass in wildtype C57BL/6NCrI mice.

Supplementary Figure S3. Sexual dimorphism of metabolomics data and phenotype data in wildtype mice

Supplementary Figure S4. PLS-DA plots of metabolomic data in 30 KO mouse lines compared to wildtype mice

Supplementary Figure S5. Heatmaps of ChemRICH set enrichment clusters for female (F) and male (M) wildtype mice, calculated from Spearman rank correlations of metabolite versus IMPC phenotypes.

### **Online Datasets:**

Supplementary Data S1: phenotype data

Supplementary Data S2: metabolite data

Supplementary Data S3: WT metabolite differences

Supplementary Data S4: WT phenotype statistics

Supplementary Data S5: Knockout 2-way ANOVA (data for Figure 3)

Supplementary Data S6: Knockout gene-sex interactions

Supplementary Data S7: Metabolite-phenotype associations

| Supplementary TableS1. Gene information of 30 knockout lines |                                                                        |          |            |        |            |        |                             |
|--------------------------------------------------------------|------------------------------------------------------------------------|----------|------------|--------|------------|--------|-----------------------------|
| Gene symbol                                                  | Name                                                                   | Zygosity | Male       |        | Female     |        | Comment                     |
|                                                              |                                                                        |          | Age (wks)  | Number | Age (wks)  | Number |                             |
| None (wildtype control)                                      | Null                                                                   | +/+      | 16.1 ± 0.3 | 20     | 16.1 ± 0.3 | 20     | /                           |
| <i>A2m</i>                                                   | Alpha-2-macroglobulin                                                  | -/-      | 15.7 ± 0   | 3      | 15.7 ± 0   | 3      | Target protein assay        |
| <i>Ahcy</i>                                                  | S-adenosylhomocysteine hydrolase                                       | +/-      | 16.1 ± 0.2 | 3      | 16.2 ± 0.3 | 3      | Enzyme on pathway reactions |
| <i>Atp5b</i>                                                 | ATP synthase, H+ transporting mitochondrial F1 complex, beta subunit   | +/-      | 16.3 ± 0   | 3      | 16 ± 0.5   | 3      | Target protein assay        |
| <i>Atp6v0d1</i>                                              | ATPase H+ Transporting lysosomal V0 Subunit D1                         | +/-      | 16.2 ± 0.1 | 3      | 15.9 ± 0   | 3      | Random selection            |
| <i>C8a</i>                                                   | Complement Component 8, alpha polypeptide                              | -/-      | 16 ± 0.2   | 3      | 16.2 ± 0.6 | 3      | Target protein assay        |
| <i>Cdk4</i>                                                  | Cyclin Dependent Kinase 4                                              | +/-      | 15.9 ± 0   | 3      | 16 ± 0.4   | 3      | Random selection            |
| <i>Dhfr</i>                                                  | Dihydrofolate reductase                                                | +/-      | 16.3 ± 0   | 3      | 16.1 ± 0.4 | 3      | Enzyme on pathway reactions |
| <i>Dync1i1</i>                                               | Dynein Cytoplasmic 1 Light Intermediate Chain 1                        | +/-      | 16 ± 0.3   | 3      | 16.4 ± 0   | 3      | Random selection            |
| <i>G6pd2</i>                                                 | Glucose 6-phosphate dehydrogenase 2                                    | -/-      | 16.4 ± 0.3 | 3      | 15.9 ± 0.1 | 3      | Enzyme on pathway reactions |
| <i>Galc</i>                                                  | Galactosylceramidase                                                   | +/-      | 16.1 ± 0   | 3      | 16 ± 0     | 3      | Enzyme on pathway reactions |
| <i>Gnlda1</i>                                                | Glucosamine-6-phosphate deaminase 1                                    | +/-      | 16.3 ± 0.1 | 3      | 16.3 ± 0.1 | 3      | Enzyme on pathway reactions |
| <i>Idh1</i>                                                  | Isocitrate dehydrogenase                                               | -/-      | 16 ± 0.2   | 3      | 16.1 ± 0.4 | 3      | Random selection            |
| <i>Iqgap1</i>                                                | IQ motif containing GTPase activating protein 1                        | -/-      | 15.8 ± 0.1 | 3      | 15.9 ± 0.1 | 3      | Random selection            |
| <i>Lmbrd1</i>                                                | LMBR1 domain containing 1                                              | +/-      | 16 ± 0.2   | 3      | 15.9 ± 0.2 | 3      | Enzyme on pathway reactions |
| <i>Mfap4</i>                                                 | Microfibrillar-associated protein 4                                    | -/-      | 16 ± 0.2   | 3      | 16.6 ± 0   | 3      | Target protein assay        |
| <i>Mmachc</i>                                                | Methylmalonic aciduria cblC type, with homocystinuria                  | +/-      | 16 ± 0.4   | 3      | 16 ± 0.2   | 3      | Enzyme on pathway reactions |
| <i>Mvk</i>                                                   | mevalonate kinase                                                      | +/-      | 16.4 ± 0.1 | 3      | 15.7 ± 0.1 | 3      | Random selection            |
| <i>Nek2</i>                                                  | NIMA (never in mitosis gene a)-related expressed kinase 2              | -/-      | 15.8 ± 0.2 | 3      | 16 ± 0.1   | 3      | Random selection            |
| <i>Npc2</i>                                                  | NPC intracellular cholesterol transporter 2                            | +/-      | 16 ± 0.2   | 3      | 16.2 ± 0.2 | 3      | Enzyme on pathway reactions |
| <i>Pebp1</i>                                                 | Phosphatidylethanolamine binding protein 1                             | -/-      | 16.3 ± 0.2 | 3      | 16 ± 0.1   | 3      | Target protein assay        |
| <i>Phyh</i>                                                  | Phytanoyl-CoA hydroxylase                                              | -/-      | 16.1 ± 0.3 | 3      | 16 ± 0.3   | 3      | Random selection            |
| <i>Pipox</i>                                                 | Pipecolic acid oxidase                                                 | -/-      | 15.8 ± 0.2 | 3      | 16.1 ± 0   | 3      | Enzyme on pathway reactions |
| <i>Plk1</i>                                                  | Polo-like kinase 1, serine/threonine protein kinase                    | +/-      | 16.1 ± 0   | 3      | 16 ± 0.2   | 3      | Random selection            |
| <i>Pmm2</i>                                                  | Phosphomannomutase 2                                                   | +/-      | 16 ± 0.1   | 3      | 16.2 ± 0.1 | 3      | Random selection            |
| <i>Ptpn12</i>                                                | Protein tyrosine phosphatase, non-receptor type 12                     | +/-      | 15.9 ± 0.1 | 3      | 15.7 ± 0.2 | 3      | Random selection            |
| <i>Ptfg1</i>                                                 | Pituitary tumor-transforming gene 1                                    | -/-      | 16.1 ± 0   | 3      | 15.8 ± 0.2 | 3      | Random selection            |
| <i>Rock1</i>                                                 | Rho-associated coiled-coil containing protein kinase 1                 | +/-      | 16 ± 0.2   | 3      | 16.1 ± 0.2 | 3      | Random selection            |
| <i>Sra1</i>                                                  | Steroid receptor RNA activator 1                                       | -/-      | 16.2 ± 0.1 | 3      | 15.9 ± 0   | 3      | Random selection            |
| <i>Ulk3</i>                                                  | Unc-51-like kinase 3                                                   | -/-      | 16.1 ± 0.2 | 3      | 16 ± 0.2   | 3      | Random selection            |
| <i>Ywhaz</i>                                                 | Tyrosine 3-monooxygenase/tryptophan 5-monooxygenase activation protein | +/-      | 16.3 ± 0.1 | 3      | 16.4 ± 0.1 | 3      | Enzyme on pathway reactions |

Supplementary TableS2.Number of significantly changed metabolites by genotype effect and their alterations in 30 knockout strains.

| Genotype                       | # of Significant metabolites | Significant clusters | FC > 2 or FC < 0.5 | FC > 5 or FC < 0.2 | FC > 10 or FC < 0.1 |
|--------------------------------|------------------------------|----------------------|--------------------|--------------------|---------------------|
| <i>A2m</i> <sup>-/-</sup>      | 201                          | 13                   | 36                 | 0                  | 2                   |
| <i>Ahcy</i> <sup>-/-</sup>     | 128                          | 10                   | 22                 | 2                  | 0                   |
| <i>Atp5b</i> <sup>-/-</sup>    | 181                          | 13                   | 52                 | 3                  | 1                   |
| <i>Atp6v0d1</i> <sup>-/-</sup> | 120                          | 10                   | 29                 | 2                  | 0                   |
| <i>C8a</i> <sup>-/-</sup>      | 203                          | 14                   | 50                 | 1                  | 3                   |
| <i>Cdk4</i> <sup>-/-</sup>     | 135                          | 16                   | 29                 | 3                  | 1                   |
| <i>Dhfr</i> <sup>-/-</sup>     | 184                          | 13                   | 43                 | 5                  | 1                   |
| <i>Dync1li1</i> <sup>-/-</sup> | 229                          | 13                   | 63                 | 7                  | 0                   |
| <i>G6pd2</i> <sup>-/-</sup>    | 113                          | 8                    | 26                 | 5                  | 4                   |
| <i>Galc</i> <sup>-/-</sup>     | 154                          | 9                    | 36                 | 2                  | 2                   |
| <i>Gnpda1</i> <sup>-/-</sup>   | 143                          | 9                    | 29                 | 2                  | 2                   |
| <i>Idh1</i> <sup>-/-</sup>     | 156                          | 13                   | 28                 | 4                  | 0                   |
| <i>Iqgap1</i> <sup>-/-</sup>   | 137                          | 13                   | 17                 | 1                  | 2                   |
| <i>Lmbrd1</i> <sup>-/-</sup>   | 198                          | 13                   | 53                 | 2                  | 1                   |
| <i>Mfap4</i> <sup>-/-</sup>    | 192                          | 10                   | 34                 | 4                  | 1                   |
| <i>Mmachc</i> <sup>-/-</sup>   | 182                          | 13                   | 35                 | 2                  | 3                   |
| <i>Mvk</i> <sup>-/-</sup>      | 230                          | 13                   | 43                 | 9                  | 4                   |
| <i>Nek2</i> <sup>-/-</sup>     | 205                          | 15                   | 47                 | 1                  | 3                   |
| <i>Npc2</i> <sup>-/-</sup>     | 213                          | 14                   | 64                 | 7                  | 2                   |
| <i>Pebp1</i> <sup>-/-</sup>    | 183                          | 13                   | 36                 | 4                  | 3                   |
| <i>Phyh</i> <sup>-/-</sup>     | 159                          | 8                    | 39                 | 5                  | 5                   |
| <i>Pipox</i> <sup>-/-</sup>    | 121                          | 5                    | 22                 | 2                  | 1                   |
| <i>Plk1</i> <sup>-/-</sup>     | 127                          | 10                   | 27                 | 3                  | 2                   |
| <i>Pmm2</i> <sup>-/-</sup>     | 232                          | 18                   | 59                 | 6                  | 7                   |
| <i>Ptpn12</i> <sup>-/-</sup>   | 149                          | 7                    | 32                 | 2                  | 2                   |
| <i>Pttg1</i> <sup>-/-</sup>    | 179                          | 17                   | 38                 | 5                  | 1                   |
| <i>Rock1</i> <sup>-/-</sup>    | 97                           | 7                    | 26                 | 2                  | 1                   |
| <i>Sra1</i> <sup>-/-</sup>     | 181                          | 15                   | 33                 | 3                  | 2                   |
| <i>Ulk3</i> <sup>-/-</sup>     | 213                          | 17                   | 64                 | 8                  | 2                   |
| <i>Ywhaz</i> <sup>-/-</sup>    | 154                          | 12                   | 36                 | 7                  | 7                   |

**Supplementary TableS3.Examples of sexual dimorphism of phenotypes (continuous traits) in wildtype mice and their alterations in 30 knockout lines.**

| Phenotype                   | Sex Effect in WT | Statistical Analysis in KO Lines                                                                                                                                               |                                                                      |
|-----------------------------|------------------|--------------------------------------------------------------------------------------------------------------------------------------------------------------------------------|----------------------------------------------------------------------|
|                             |                  | Genotype Effect                                                                                                                                                                | Genotype-sex Interaction                                             |
| Heart weight, mg            | ***              | A2m, Atp5b, Atp6v0d1, Cdk4, Gnpda1, Iqgap1                                                                                                                                     | A2m, Atp6v0d1, Iqgap1                                                |
| Body weight, g              | ***              | A2m, Atp6v0d1, C8a, Cdk4, Dhfr, Dync1li1, Idh1, Iqgap1, Npc2, Pebp1, Plk1, Sra1                                                                                                | A2m, C8a, Dync1li1, Npc2, Pebp1, Sra1                                |
| Heart/Body weight, mg/g     | ns               | Atp5b, Atp6v0d1, C8a, Idh1, Mvk, Nek2, Pipox, Ulk3, Ywhaz                                                                                                                      | C8a, Pipox, Ywhaz                                                    |
| Alkaline phosphatase        | ***              | Dhfr, Gnpda1, Plk1, Sra1, Ulk3                                                                                                                                                 | Dhfr, Sra1, Ulk3                                                     |
| Total cholesterol           | ***              | Atp6v0d1, C8a, Dync1li1, Galc, Gnpda1, Idh1, Sra1, Ulk3                                                                                                                        | Galc                                                                 |
| HDL cholesterol             | ***              | A2m, Atp6v0d1, Galc, Gnpda1, Lmbrd1, Mfap4, Mmachc, Pebp1                                                                                                                      | Galc, Lmbrd1, Mmachc, Pebp1                                          |
| Non-HDL cholesterol *       | ns               | Ahcy, C8a, Dhfr, Galc, Gnpda1, Idh1, Npc2, Rock1, Sra1, Ulk3                                                                                                                   | C8a, Galc, Idh1, Ulk3                                                |
| Triglycerides               | ***              | A2m, Ahcy, Dync1li1, Lmbrd1, Npc2, Atp5b, Atp6v0d1, Cdk4, Dhfr, Dync1li1, G6pd2, Idh1, Iqgap1, Lmbrd1, Mfap4, Mmachc, Nek2, Phyh, Pipox, Plk1, Pmm2, Pttg1, Rock1, Sra1, Ywhaz | Ahcy, Npc2                                                           |
| Tibia length, mm            | ns               | Ahcy, Atp5b, Atp6v0d1, Cdk4, Dhfr, G6pd2, Idh1, Iqgap1, Lmbrd1, Mfap4, Mmachc, Phyh, Pipox, Plk1, Pmm2, Ptpn12, Sra1, Ywhaz                                                    | Atp5b, Dhfr, Dync1li1, Mfap4, Mmachc, Phyh, Pipox, Plk1, Pttg1, Sra1 |
| Heart/Tibia length, mg/cm * | ***              |                                                                                                                                                                                | Dhfr, Pipox, Pmm2, Sra1                                              |

\* Values were additionally calculated from measured phenotypes.

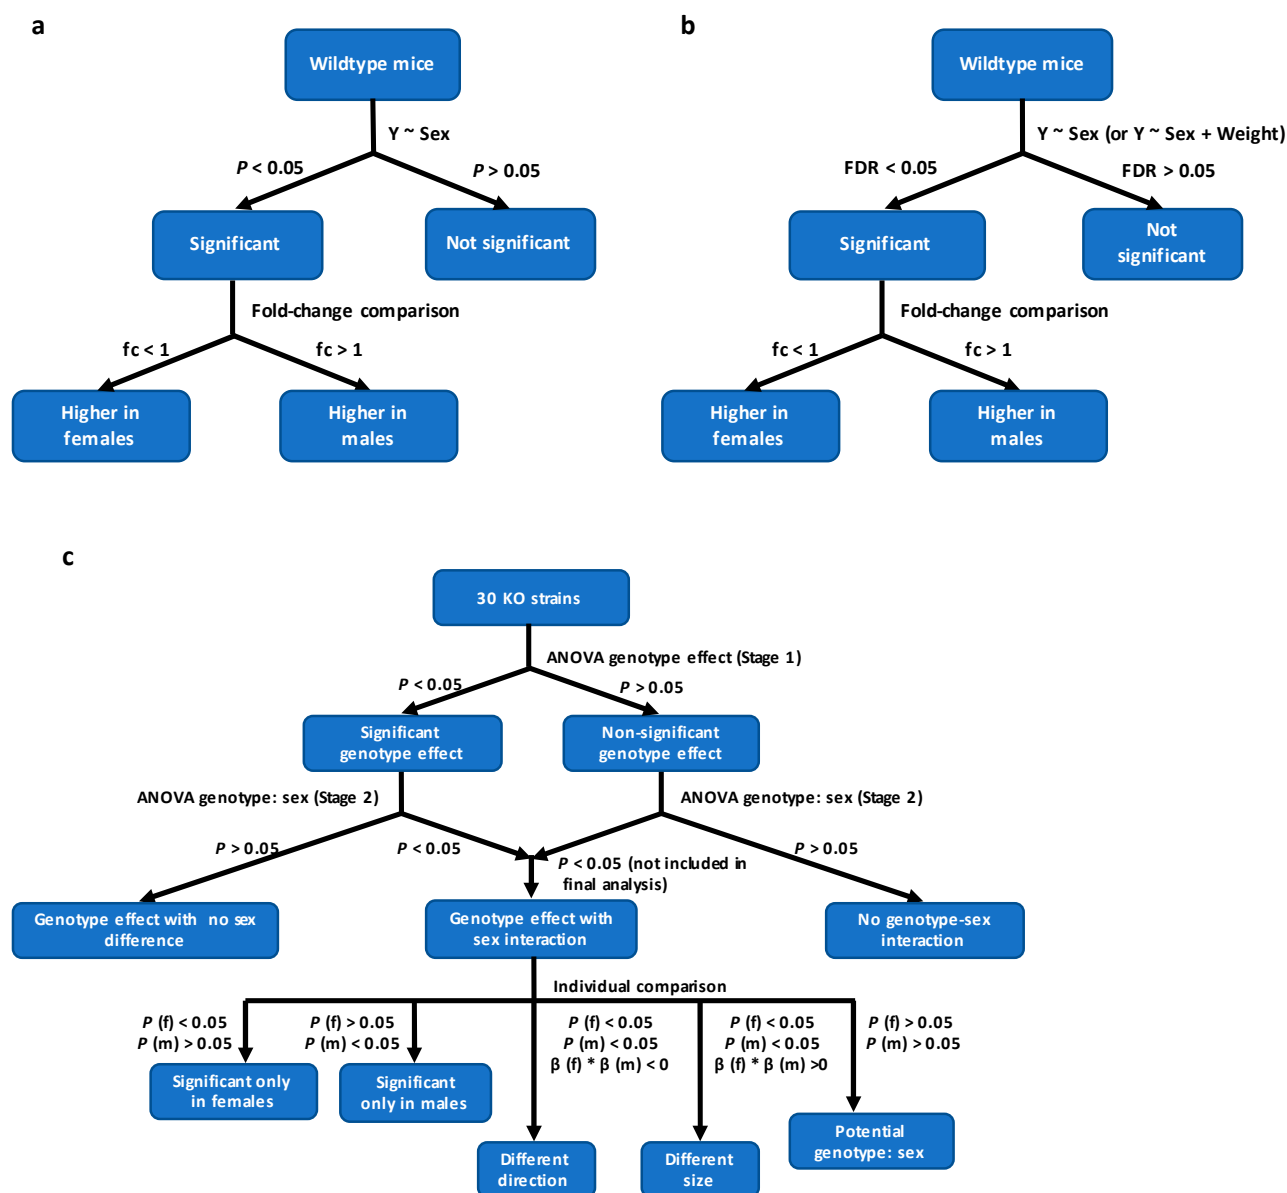

**Supplementary Figure S1. Statistical analysis designs to study sexual dimorphism in wildtype mice and in knockout mice.**

- Statistical analysis in wildtype mice using generalized linear model at  $P < 0.05$
- Statistical analysis in wildtype mice using generalized linear model at  $P < 0.05$  with false discovery rate correction (FDR  $< 0.05$ ) and body weight adjustment
- Statistical analysis for genotype-sex interaction effect in knockout lines compared to wildtype mice using two-way ANOVA followed by individual comparison by generalized linear model at  $P < 0.05$ .

Statistical tests were adopted from Karp, N.A.; Heller, R.; Yaacoby, S.; White, J.K.; Benjamini, Y. Improving the Identification of Phenotypic Abnormalities and Sexual Dimorphism in Mice When Studying Rare Event Categorical Characteristics. *Genetics* 2017, 205, 491–501

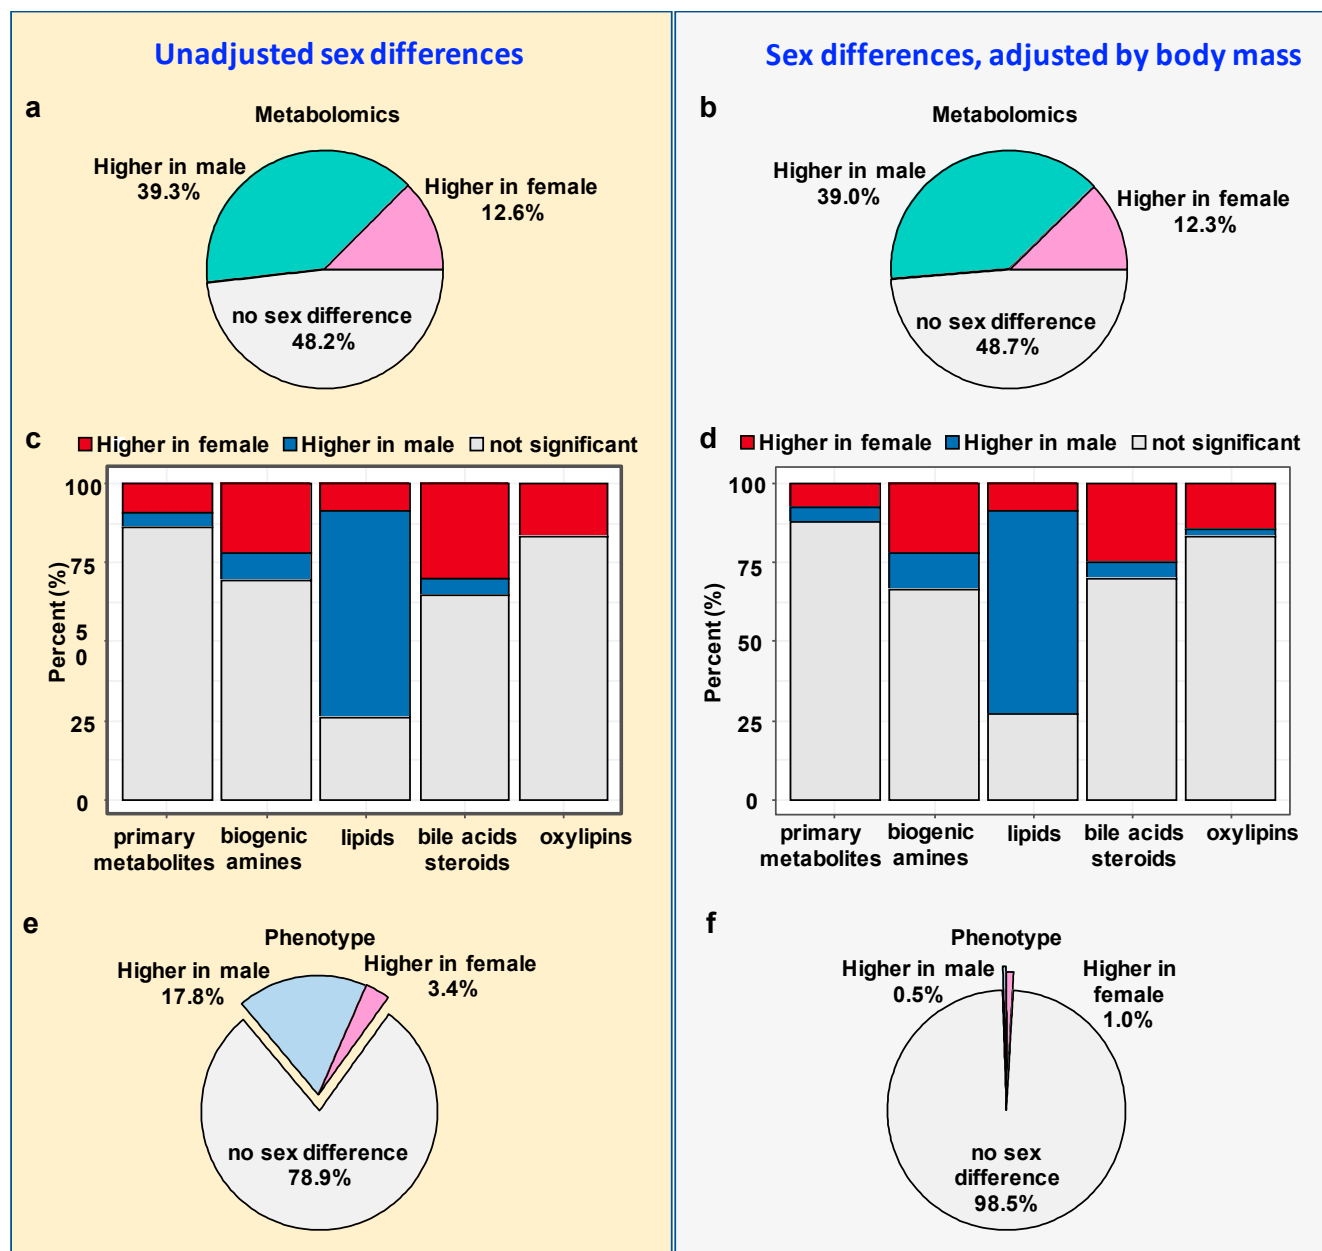

**Supplementary Figure S2. Sex as a biological variable in metabolomics data with a stricter significance threshold and adjusted to body mass in wildtype C57BL/6NCrl mice (n = 20 males & 20 females, generalized linear model at FDR < 0.05).**

- (a) Proportion of metabolites significantly affected by sex
- (b) Proportion of metabolites significantly affected by sex, adjusted by body mass.
- (c) Assay-based proportion of sex-affected metabolites.
- (d) Assay-based proportion of sex-affected metabolites, adjusted by body mass.
- (e) Proportion of IMPC phenotypes of continuous traits significantly affected by sex.

(f) Proportion of IMPC phenotypes of continuous traits significantly affected by sex; adjusted by body mass.

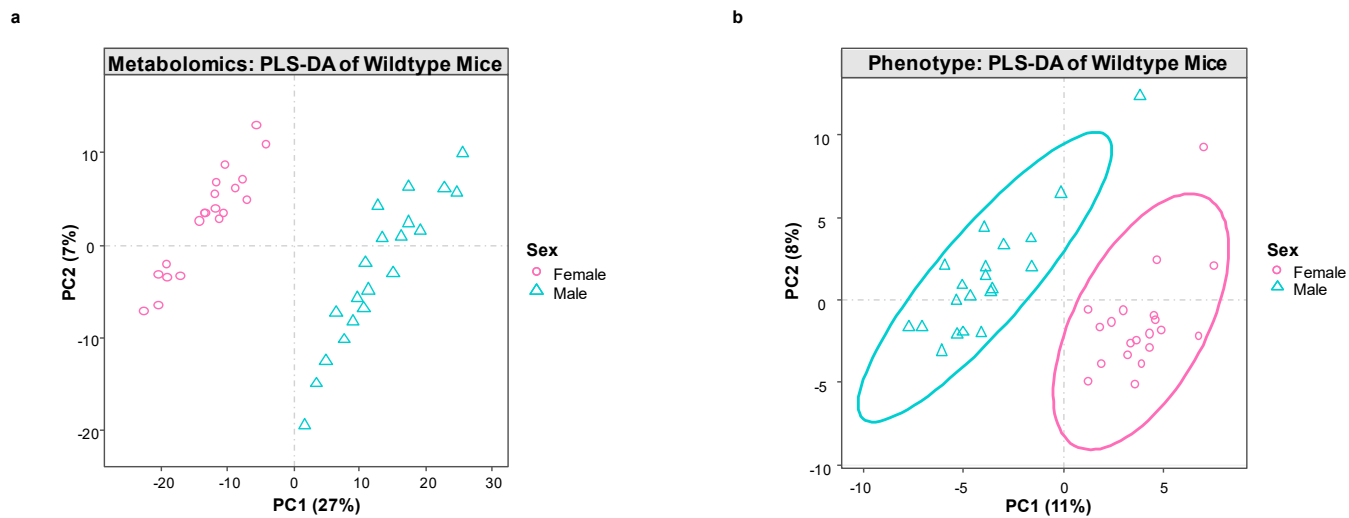

**Supplementary Figure S3.**

**Sexual dimorphism of metabolomics data and phenotype data in wildtype mice (n = 20 males & 20 females).**

- (a)** PLS-DA plot of metabolomics data in wildtype mice.
- (b)** PLS-DA plot of IMPC phenotype data in wildtype mice.

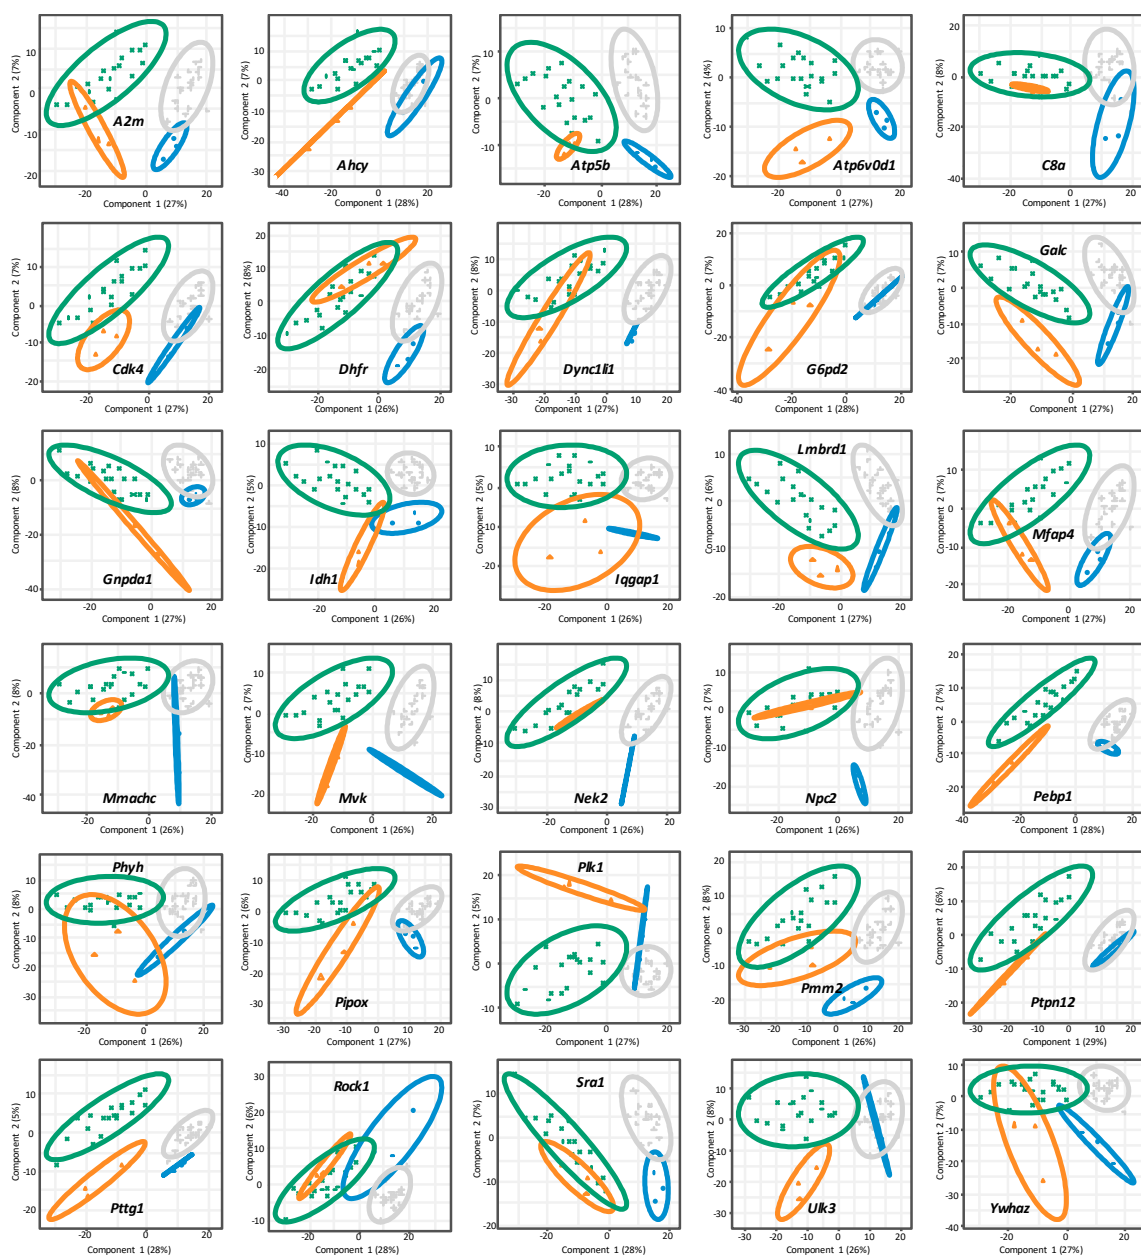

#### Group

- KO Female
- △ KO Male
- + WT Female
- × WT Male

**Supplementary Figure S4.** PLS-DA plots of metabolomic data in 30 KO mouse lines compared to wildtype mice (n = 20 males & 20 females in C57BL/6NCrI wildtype mice, n = 3 male & 3 female mice in each KO mouse line). Circles: confidence intervals for plasma metabolic phenotype variance. Axes: Regression vectors with % of total explained variance.



(5a)

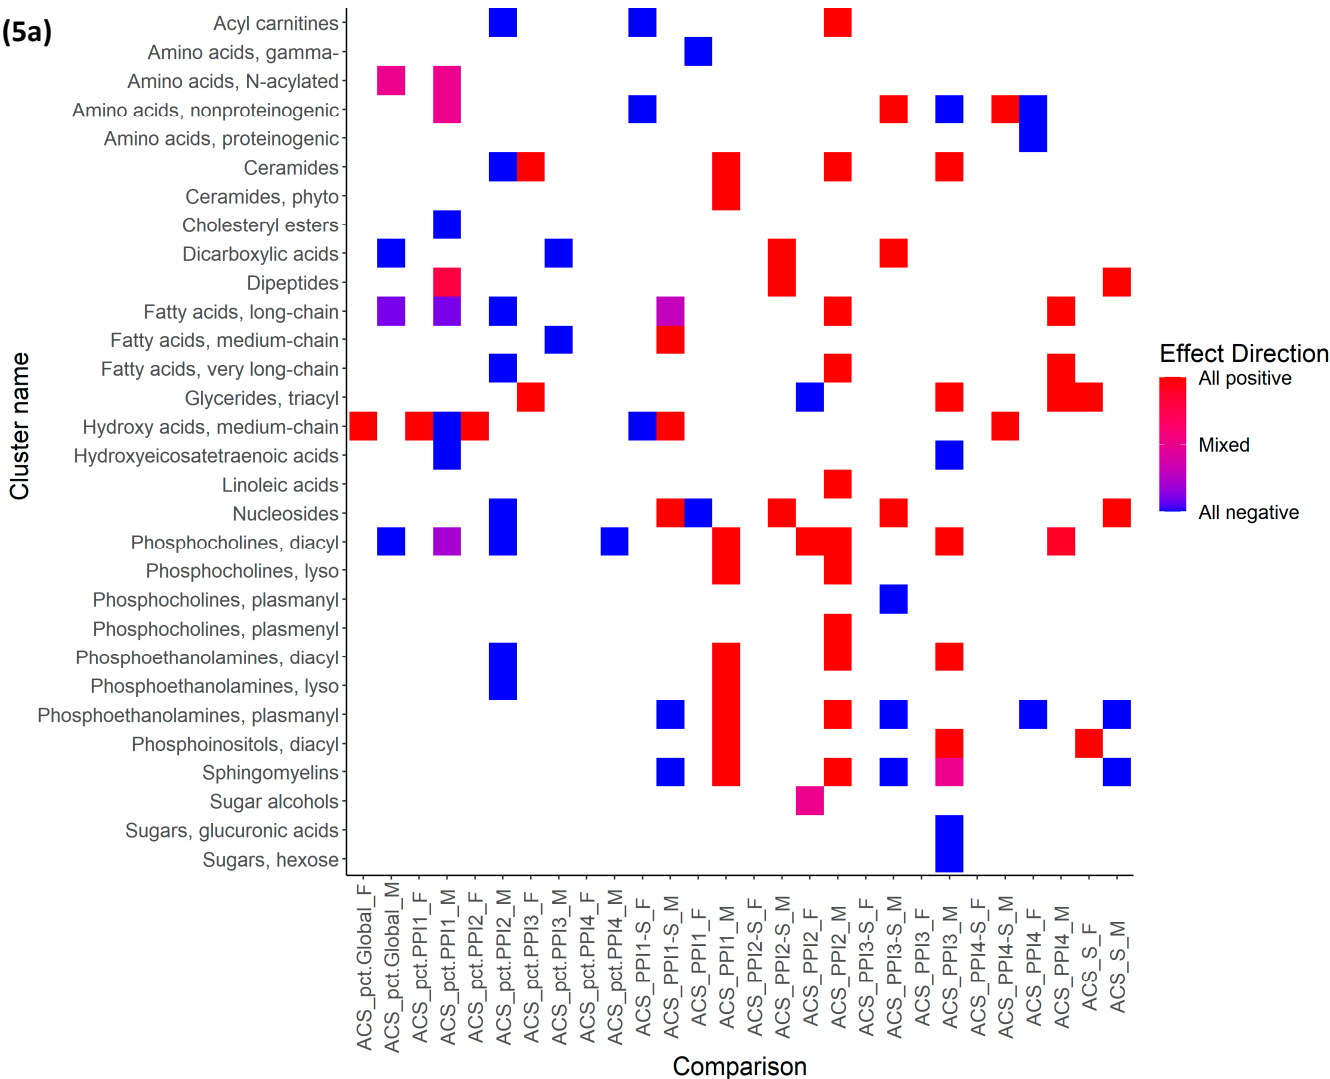

**Supplementary Figure S5a**  
**Clusters of significant phenotype associations between metabolites and Acoustic Startle and Pre-pulse Inhibition (PPI, week 10).**

The acoustic startle response is characterized by an exaggerated flinching response to an unexpected strong auditory stimulus (pre-pulse). This response can be attenuated when it is preceded by a weaker stimulus (pre-pulse) and is the principle underlying pre-pulse inhibition (PPI). Several clinical studies have shown that a number of human disorders have impaired PPI including: schizophrenia, Huntington’s disease, fragile X syndrome, and autism. Heatmaps of ChemRICH set enrichment clusters for female (F) and male (M) wildtype mice, calculated from Spearman rank correlations of metabolite versus IMPC phenotypes.

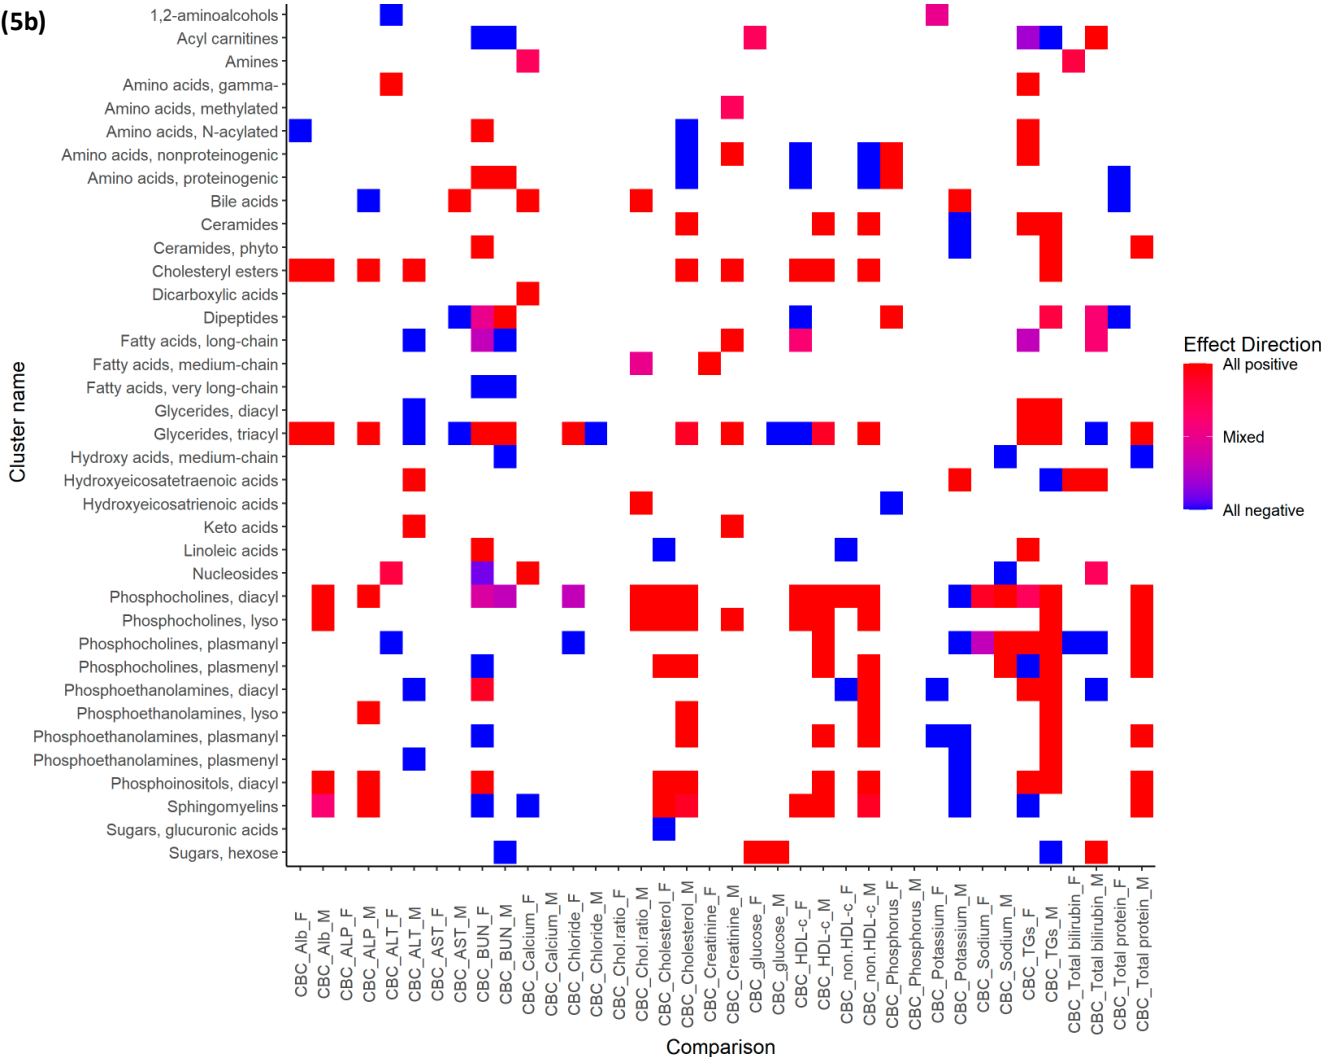

**Supplementary Figure S5b**  
**Clusters of significant phenotype associations between metabolites and Clinical Chemistry (CBC, week 16).**  
Clinical chemistry determines biochemical parameters in plasma including enzymatic activity, specific substrates and electrolytes. Heatmaps of ChemRICH set enrichment clusters for female (F) and male (M) wildtype mice, calculated from Spearman rank correlations of metabolite versus IMPC phenotypes.

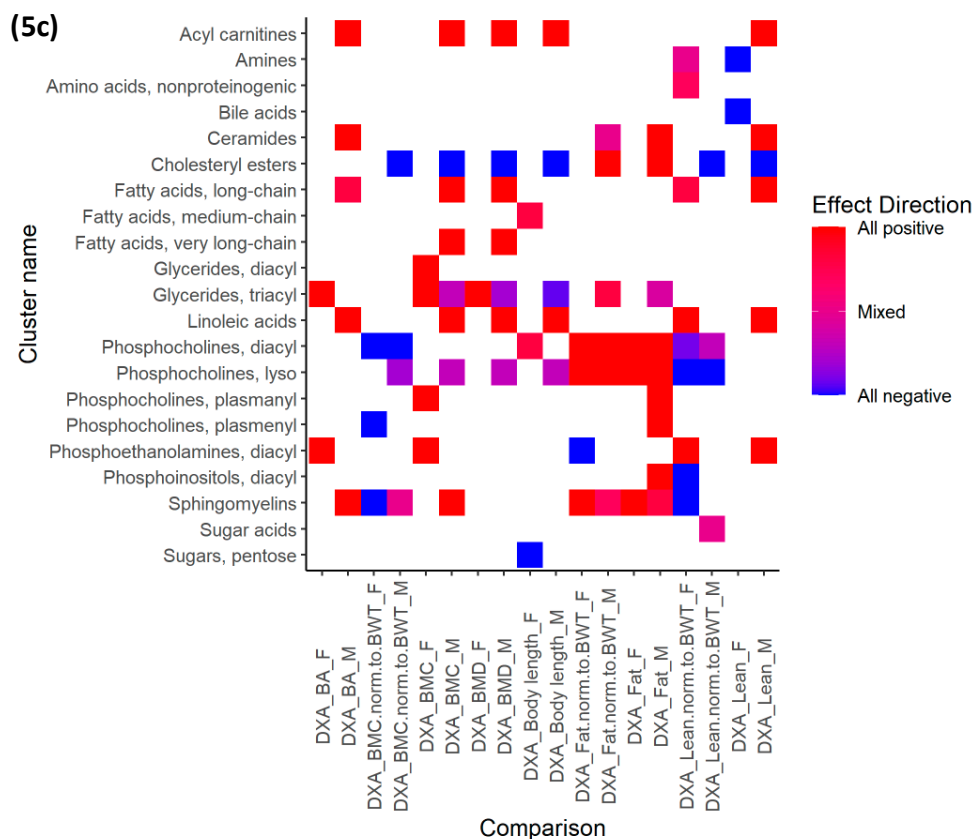

### Supplementary Figure S5c

#### Clusters of significant phenotype associations between metabolites and Body Composition (DEXA lean/fat, week 14).

Measures of bone mineral content and density as well as body composition in mice using the DEXA (Dual Energy X-ray Absorptiometry) analyzer. Heatmaps of ChemRICH set enrichment clusters for female (F) and male (M) wildtype mice, calculated from Spearman rank correlations of metabolite versus IMPC phenotypes.

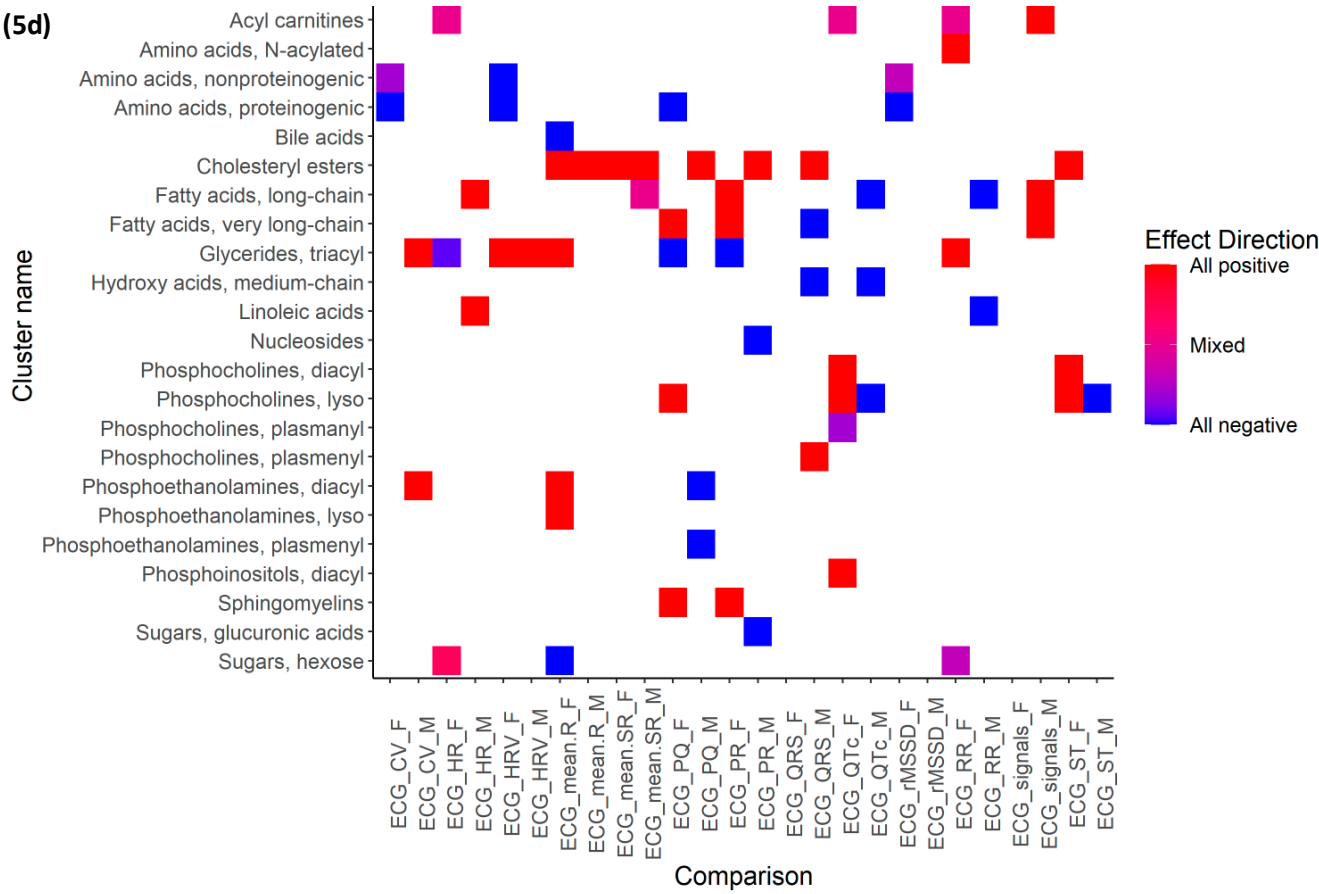

#### Supplementary Figure S5d

##### Clusters of significant phenotype associations between metabolites and Electrocardiogram (ECG, week 12).

Electrocardiographic recordings usually help to detect abnormal myocardial action potential, conduction of impulse, disturbances in cardiac rate and rhythm, and altered autonomic activities. Heatmaps of ChemRICH set enrichment clusters for female (F) and male (M) wildtype mice, calculated from Spearman rank correlations of metabolite versus IMPC phenotypes.

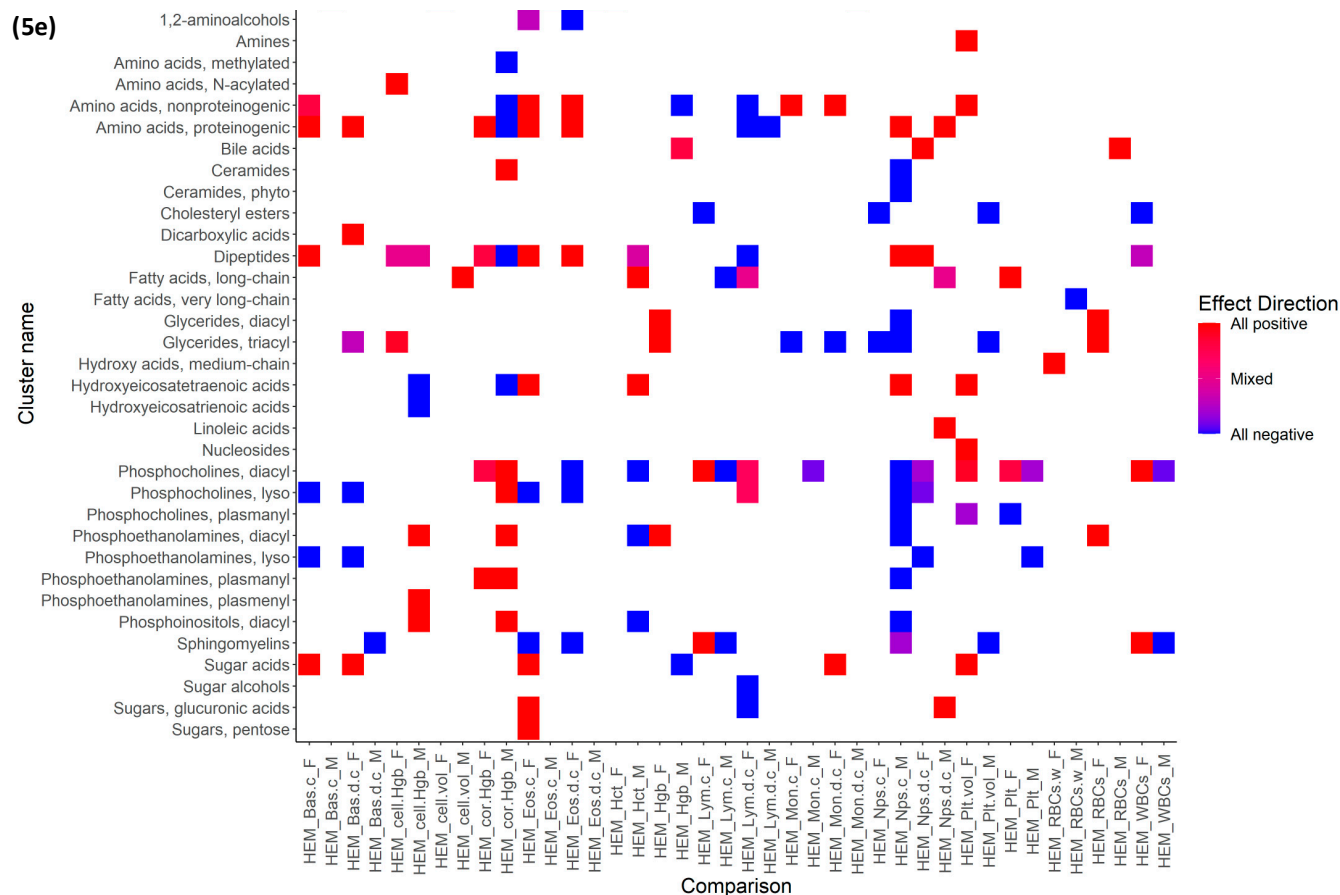

### Supplementary Figure S5e

#### Clusters of significant phenotype associations between metabolites and Hematology (week 16).

Hematological assessment of blood determines blood cell counts (white blood cells, red blood cells, hemoglobin, and platelets) and additional hematological parameters (hematocrit, mean cell volume, mean corpuscular hemoglobin, mean cell hemoglobin concentration) can be derived using these indices. These tests will indicate abnormalities in the production of blood and its components (blood cells and hemoglobin) as well as in the associated blood-forming organs. Heatmaps of ChemRICH set enrichment clusters for female (F) and male (M) wildtype mice, calculated from Spearman rank correlations of metabolite versus IMPC phenotypes.

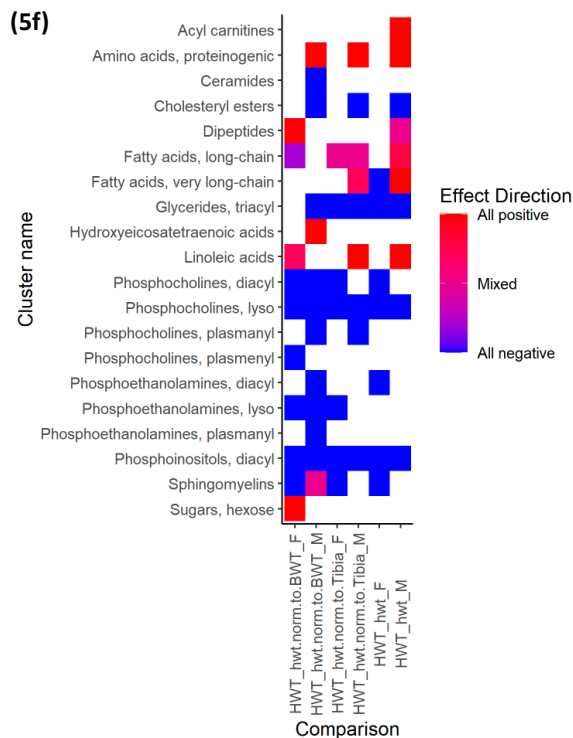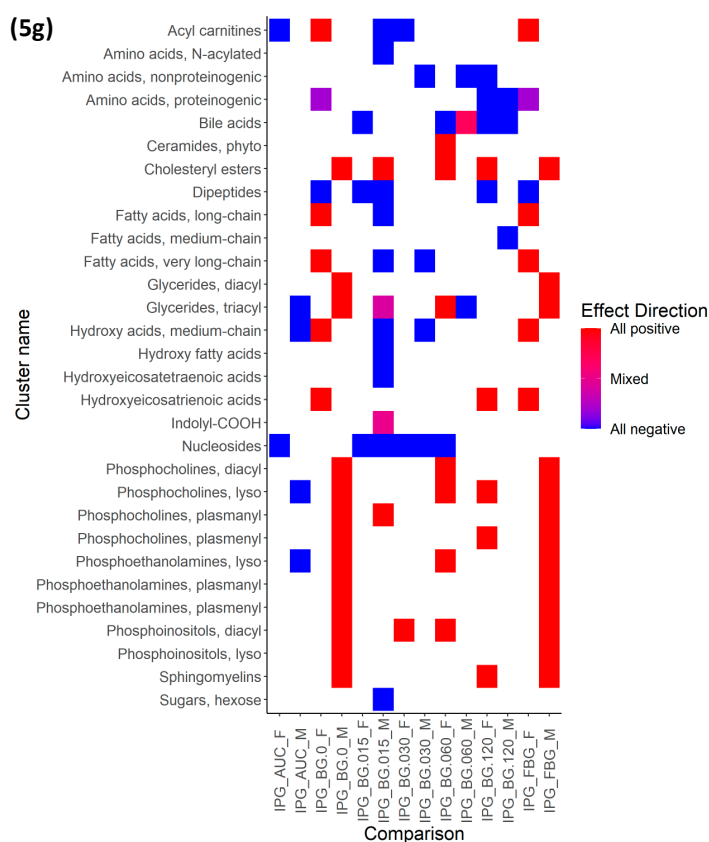

### Supplementary Figure S5f

#### Clusters of significant phenotype associations between metabolites and heart weight (week 16).

To evaluate cardiac size using heart weight and body weight.

Heatmaps of ChemRICH set enrichment clusters for female (F) and male (M) wildtype mice, calculated from Spearman rank correlations of metabolite versus IMPC phenotypes.

### Supplementary Figure S5g

#### Clusters of significant phenotype associations between metabolites and Intraperitoneal glucose tolerance (week 13).

The glucose tolerance test measures the clearance of an intraperitoneally injected glucose load from the body. It is used to detect disturbances in glucose metabolism that can be linked to human conditions such as diabetes or metabolic syndrome.

Heatmaps of ChemRICH set enrichment clusters for female (F) and male (M) wildtype mice, calculated from Spearman rank correlations of metabolite versus IMPC phenotypes.

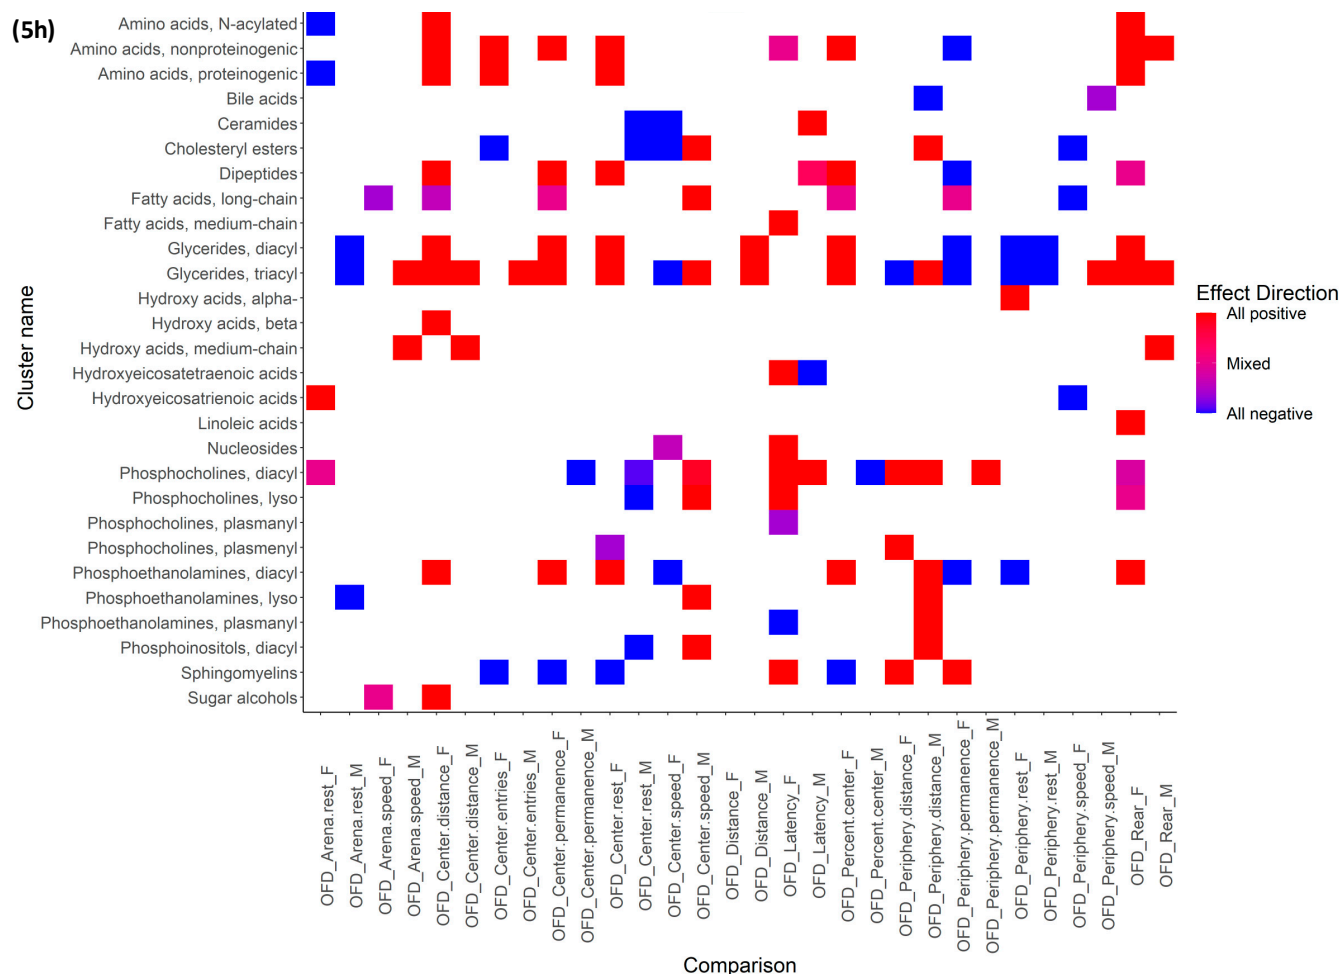

### Supplementary Figure S5h

#### Clusters of significant phenotype associations between metabolites and Open Field (week 8).

The Open Field test is used to assess anxiety and exploratory behaviors. It is based on the natural tendency of an animal to explore and to protect itself using avoidance which translates to a normal animal spending more time in the periphery of the Open Field arena than in the center (the most anxiogenic area).

Heatmaps of ChemRICH set enrichment clusters for female (F) and male (M) wildtype mice, calculated from Spearman rank correlations of metabolite versus IMPC phenotypes.
