# Supplementary material for: Sexual Dimorphism of the Mouse Plasma Metabolome Is Associated with Phenotypes of 30 Gene Knockout Lines
Source: Metabolites. 2023 Aug 15;13(8):947. doi: 10.3390/metabo13080947 (PMC10456929; doi:10.3390/metabo13080947)
Supplement: Supplementary file 1 [file metabolites-13-00947-s001.zip]

Archive with 8 entries (8 files):
- metabolites-2533412-supplementary.pdf
- Supplementary Data S1_phenotype data_Zhang et al_KOMP_08-2023.xlsx
- Supplementary Data S2_metabolite data_Zhang et al_KOMP_08-2023.xlsx
- Supplementary Data S3_WT metabolite differences_Zhang et al_KOMP_08-2023.xlsx
- Supplementary Data S4_WT phenotype data_Zhang et al_KOMP_08-2023.xlsx
- Supplementary Data S5_Knockout 2-way ANOVA (data for Figure 3)_Zhang et al_KOMP_08-2023.xlsx
- Supplementary Data S6_Knockout gene-sex interactions_Zhang et al_KOMP_08-2023.xlsx
- Supplementary Data S7_Metabolite-phenotype correlation.xlsx_Zhang et al_KOMP_08-2023.xlsx
