# Supplementary material for: Sexual Dimorphism of the Mouse Plasma Metabolome Is Associated with Phenotypes of 30 Gene Knockout Lines
Source: Metabolites. 2023 Aug 15;13(8):947. doi: 10.3390/metabo13080947 (PMC10456929; doi:10.3390/metabo13080947)
Supplement: Supplementary file 1 [file metabolites-13-00947-s001.zip › Supplementary Data S1_phenotype data_Zhang et al_KOMP_08-2023.xlsx]

## Sheet: read_me
Sexual Dimorphism of the Mouse Plasma Metabolome Is Associated with Phenotypes of 30 Gene Knockout Lines
Ying Zhang 1,2, Dinesh K. Barupal 3, Sili Fan 1, Bei Gao 4, Chao Zhu 5, Ann M. Flenniken 6,7, Colin McKerlie 6,8, Lauryl M. J. Nutter 6,8, Kevin C. Kent Lloyd 9 and Oliver Fiehn 1,*
1	West Coast Metabolomics Center, University of California Davis, Davis, CA 95616, USA; ofiehn@ucdavis.edu (O.F.) ythzhang@ucdavis.edu (Y.Z.); slfan@ucdavis.edu (S.F.)
2	Department of Chemistry, University of California, Davis, Davis, CA 95616, USA
3	Department of Environmental Medicine and Public Health, Icahn School of Medicine at Mount Sinai, New York, NY 10029, USA; dinesh.barupal@mssm.edu
4	School of Marine Sciences, Nanjing University of Information Science and Technology,Nanjing 210044, China; wintergb2012@gmail.com
5	College of Medicine & Nursing, Dezhou University, Dezhou 253023, China; zhuchao@dzu.edu.cn
6	The Centre for Phenogenomics, Toronto, ON M5T 3H7, Canada; flenniken@lunenfeld.ca (A.M.F.); colin.mckerlie@sickkids.ca (C.M.); lauryl.nutter@sickkids.ca (L.M.J.N.)
7	Lunenfeld-Tanenbaum Research Institute, Mount Sinai Hospital, Toronto, ON M5G 1X5, Canada
8	The Hospital for Sick Children, Toronto, ON M5G 1X8, Canada
9	Department of Surgery, School of Medicine, and Mouse Biology Program, University of California, Davis, Davis, CA 95616, USA; kclloyd@ucdavis.edu
	*Correspondence: ofiehn@ucdavis.edu
Procedure	Label for IMPC pipeline procedures
Procedure name	Name for IMPC pipeline procedures
Parameter	Label for parameters measured as phenotypic features
Parameter name	Parameters measured as phenotypic features
label	Unique label

## Sheet: phenotype data
SI Data 2. Cleaned IMPC Phenotype Dataset for wildtype mice and 30 KO mice lines
				Order	_001	_002	_003	_004	_005	_006	_007	_008	_009	_010	_011	_012	_013	_014	_015	_016	_017	_018	_019	_020	_021	_022	_023	_024	_025	_026	_027	_028	_029	_030	_031	_032	_033	_034	_035	_036	_037	_038	_039	_040	_041	_042	_043	_044	_045
				Genotype	null	null	null	null	null	null	null	null	null	null	null	null	null	null	null	null	null	null	null	null	null	null	null	null	null	null	null	null	null	null	null	null	null	null	null	null	null	null	null	null	A2m	A2m	A2m	A2m	A2m
				Gender	Male	Female	Female	Male	Female	Male	Female	Male	Female	Male	Female	Male	Female	Male	Female	Male	Male	Female	Female	Male	Female	Male	Female	Male	Male	Male	Female	Female	Female	Male	Female	Male	Male	Female	Male	Female	Female	Male	Male	Female	Male	Male	Female	Female	Female
				DOB	209137	209241	220170	229587	229695	237610	237716	257540	257643	281970	296904	307710	319741	348926	349029	365959	410683	417795	432639	441144	448374	483044	496096	510073	34419	38434	38538	38541	55857	69395	69499	91834	115757	115864	144610	144713	170956	187595	198313	198416	204770	204771	216077	216079	216080
Procedure	Procedure name	Parameter	Parameter name	label	B6NC_100762_209137	B6NC_100766_209241	B6NC_103485_220170	B6NC_118075_229587	B6NC_118083_229695	B6NC_130653_237610	B6NC_130659_237716	B6NC_135404_257540	B6NC_135407_257643	B6NC_142809_281970	B6NC_151396_296904	B6NC_158249_307710	B6NC_165108_319741	B6NC_172883_348926	B6NC_172886_349029	B6NC_180635_365959	B6NC_202852_410683	B6NC_209085_417795	B6NC_211702_432639	B6NC_212524_441144	B6NC_214377_448374	B6NC_219972_483044	B6NC_223417_496096	B6NC_228152_510073	B6NC_24940_034419	B6NC_26164_038434	B6NC_26168_038538	B6NC_26171_038541	B6NC_28747_055857	B6NC_31165_069395	B6NC_31169_069499	B6NC_34678_091834	B6NC_37036_115757	B6NC_37043_115864	B6NC_42020_144610	B6NC_42023_144713	B6NC_47919_170956	B6NC_92334_187595	B6NC_98732_198313	B6NC_98735_198416	ABDJ_70_204770	ABDJ_71_204771	ABDJ_77_216077	ABDJ_79_216079	ABDJ_80_216080
IMPC_ABR_002	Auditory Brain Stem Response	IMPC_ABR_001_001___1 point	Body weight	IMPC_ABR_001_001				29.5		27				28.5			26.2		26		30.5	22.3	24.9								22.3		22.7			29.6	29.4		26.1	22.6		28.2		21.4
IMPC_ABR_002	Auditory Brain Stem Response	IMPC_ABR_002_001___1 point	Click-evoked ABR threshold	IMPC_ABR_002_001				20		20				15			20		20		20	20	20								20		15			15	15		20	20		20		20
IMPC_ABR_002	Auditory Brain Stem Response	IMPC_ABR_004_001___1 point	6kHz-evoked ABR Threshold	IMPC_ABR_004_001				35		35				25			30		35		35	35	30								30		35			20	25		35	45		35		35
IMPC_ABR_002	Auditory Brain Stem Response	IMPC_ABR_006_001___1 point	12kHz-evoked ABR Threshold	IMPC_ABR_006_001				25		25				20			15		15		20	20	15								20		15			20	15		25	25		20		20
IMPC_ABR_002	Auditory Brain Stem Response	IMPC_ABR_008_001___1 point	18kHz-evoked ABR Threshold	IMPC_ABR_008_001				25		30				20			20		25		25	25	20								20		20			20	20		25	20		20		20
IMPC_ABR_002	Auditory Brain Stem Response	IMPC_ABR_010_001___1 point	24kHz-evoked ABR Threshold	IMPC_ABR_010_001				25		30				25			25		30		35	30	30								30		25			25	20		30	25		25		30
IMPC_ABR_002	Auditory Brain Stem Response	IMPC_ABR_012_001___1 point	30kHz-evoked ABR Threshold	IMPC_ABR_012_001				35		50				25			40		50		60	50	50								55		30			40	30		35	35		40		50
IMPC_ACS_003	Acoustic Startle and Pre-pulse Inhibition (PPI)	IMPC_ACS_001_001___1 point	Response amplitude - BN	IMPC_ACS_001_001	7.5	16.5	17.3333	24.6667	8.33333	10.6667	11.6667	15.6667	7.5	21.1667	13.3333	16.5	16.3333	13.3333	8.33333	22.8333	86.1667	24.3333	13.3333	20.5	17	14.1667	8.33333	9.16667	15.6667	15.6667	14.1667	13	6.66667	16.5	11.5	11.6667	14	10.8333	19.6667	9.16667	9	8.33333	9.16667	11.5	17.3333	16.5	9.16667	14	12.5
IMPC_ACS_003	Acoustic Startle and Pre-pulse Inhibition (PPI)	IMPC_ACS_002_001___1 point	Response amplitude - PP1	IMPC_ACS_002_001	14.8571	14.8571	17	14.8571	12.1429	12	14.7143	20.1429	16.2857	27.4286	19.7143	14.7143	8.57143	14.1429	11.2857	12.7143	34.4286	22.4286	23.8571	18.8571	14.8571	21.1429	10	12.1429	11.2857	13.4286	12.7143	9.85714	9.85714	11.2857	16.2857	13.5714	11.4286	10.5714	9.14286	9.14286	9.85714	11.1429	13.4286	6.42857	13.5714	19.5714	11.2857	11.2857	14.2857
IMPC_ACS_003	Acoustic Startle and Pre-pulse Inhibition (PPI)	IMPC_ACS_003_001___1 point	Response amplitude - PP2	IMPC_ACS_003_001	19.6667	10.8333	17.3333	23	12.5	10.8333	12.3333	17.3333	11.5	18.8333	18.8333	10	13.1667	24.5	9.16667	15.6667	20.6667	28.6667	15.6667	18.1667	29.5	21.1667	13.1667	18	16.5	9.16667	14	9.16667	8.33333	44.1667	10.8333	12.5	18.6667	12.5	7.5	13.1667	14.8333	16.5	17.1667	12.5	13.3333	19.5	14.1667	11.5	14
IMPC_ACS_003	Acoustic Startle and Pre-pulse Inhibition (PPI)	IMPC_ACS_004_001___1 point	Response amplitude - PP3	IMPC_ACS_004_001	19	14	16.5	15.6667	18.1667	14	18	20.5	15.6667	21.8333	14	27	13.1667	41.6667	30.8333	24.5	36	26.1667	15.8333	36	14.8333	24.5	26.8333	24.5	17.5	11.5	9.16667	14	16.5	14.8333	19.5	16.5	16.3333	18	18.1667	24.5	24.3333	21.3333	27	23	13.3333	27.8333	14	19	16.5
IMPC_ACS_003	Acoustic Startle and Pre-pulse Inhibition (PPI)	IMPC_ACS_005_001___1 point	Response amplitude - PP4	IMPC_ACS_005_001	57.8333	18.8333	12.3333	37.6667	50.5	27.5	39.1667	22	16.6667	19.6667	26.8333	14.8333	15.5	31.8333	19.5	34.5	35.8333	28.6667	16.5	26.8333	23.6667	40.8333	45.6667	32.6667	37.3333	14.1667	19.6667	23.6667	20.5	44	40.1667	35.1667	14.6667	27.6667	18.1667	62	40.6667	38.5	31	28.6667	25.1667	25.3333	21.3333	37.3333	38.5
IMPC_ACS_003	Acoustic Startle and Pre-pulse Inhibition (PPI)	IMPC_ACS_006_001___1 point	Response amplitude - S	IMPC_ACS_006_001	343.333	139	115.667	92.8333	407.167	85.3333	105	129.333	167.5	129.167	186.333	322.333	165.833	320.5	158.667	163.667	95.1667	56.1667	89.5	87	60.1667	36.5	369.5	100.833	157.167	134.167	127.667	108.167	151.167	340.833	140	71.8333	149	88.6667	160.167	47.3333	256.333	281.5	106.667	68.5	122.833	132.5	107.333	406	93.5
IMPC_ACS_003	Acoustic Startle and Pre-pulse Inhibition (PPI)	IMPC_ACS_007_001___1 point	Response amplitude - PP1_S	IMPC_ACS_007_001	295.8	151.2	54.8	91	305.6	51.8	96.6	85	47.4	88	188.6	253.8	57.6	295.2	86	86	95.4	29.4	59.6	57.6	156.2	34	276.4	36.4	110.6	75.4	73.2	128.8	193.4	258.6	79.8	85.8	144.6	61.4	163	134	212.8	268.6	97.6	41	52.8	159.2	116	198.2	67.4
IMPC_ACS_003	Acoustic Startle and Pre-pulse Inhibition (PPI)	IMPC_ACS_008_001___1 point	Response amplitude - PP2_S	IMPC_ACS_008_001	181.5	100.167	13.3333	59.3333	283.833	14.8333	43.8333	40	53.6667	90.5	101	150.5	43.1667	90.3333	25	43	38.1667	34.1667	15	18	49.5	22.3333	167.667	15	56.3333	27.6667	60.3333	60.1667	169.333	170	43	22	44.5	43.1667	40.8333	72.3333	188.667	109.833	26.1667	46.5	19	78.1667	81.3333	216.5	34.1667
IMPC_ACS_003	Acoustic Startle and Pre-pulse Inhibition (PPI)	IMPC_ACS_009_001___1 point	Response amplitude - PP3_S	IMPC_ACS_009_001	175	137.5	20.3333	29.5	276.5	11.6667	19	23.8333	23.8333	42.1667	124.5	122	19	61.8333	12.5	17.1667	23	20.5	10.8333	18.8333	44	13.1667	131	16.5	29.5	27.1667	37.6667	30	76.3333	122	20.5	18.8333	57	21.1667	35.8333	42.3333	53.8333	160.5	31.5	57.6667	13.1667	42.3333	77.3333	105.167	30.8333
IMPC_ACS_003	Acoustic Startle and Pre-pulse Inhibition (PPI)	IMPC_ACS_010_001___1 point	Response amplitude - PP4_S	IMPC_ACS_010_001	145.667	72.1667	21.3333	29.3333	129.333	12.5	15.5	29.3333	8.33333	21.1667	70.1667	54.5	16.5	19	12.5	18.3333	22.8333	14.1667	20.3333	17.3333	15.6667	27.1667	54	10	20.5	19	35	44.6667	49.5	61.8333	17.8333	15.6667	26.1667	23	19	13.3333	56.8333	105.667	19.8333	21.3333	25.3333	24.5	40.6667	74	32.5
IMPC_ACS_003	Acoustic Startle and Pre-pulse Inhibition (PPI)	IMPC_ACS_033_001___1 point	% Pre-pulse inhibition - PPI1	IMPC_ACS_033_001	13.8447	-8.77698	52.6225	1.97487	24.9447	39.2969	8	34.2784	71.7015	31.871	-1.21646	21.2616	65.2663	7.89392	45.7983	47.4542	-0.245184	47.6558	33.4078	33.7931	-159.612	6.84931	25.1962	63.9008	29.6288	43.8012	42.6632	-19.0755	-27.9383	24.1271	43	-19.4432	2.95302	30.7519	-1.76899	-183.099	16.9831	4.58259	8.5	40.146	57.0149	-20.1509	-8.07453	51.1823	27.9144
IMPC_ACS_003	Acoustic Startle and Pre-pulse Inhibition (PPI)	IMPC_ACS_034_001___1 point	% Pre-pulse inhibition - PPI2	IMPC_ACS_034_001	47.1359	27.9377	88.4726	36.0862	30.2906	82.6172	58.254	69.0722	67.9602	29.9355	45.7961	53.3092	73.9698	71.8149	84.2437	73.7271	59.8949	39.1691	83.2402	79.3103	17.7285	38.8128	54.6234	85.124	64.1569	79.3789	52.7415	44.376	-12.0176	50.1223	69.2857	69.3735	70.1342	51.3158	74.5057	-52.8169	26.3979	60.9828	75.4688	32.1168	84.5319	41.0063	24.2236	46.6749	63.4581
IMPC_ACS_003	Acoustic Startle and Pre-pulse Inhibition (PPI)	IMPC_ACS_035_001___1 point	% Pre-pulse inhibition - PPI3	IMPC_ACS_035_001	49.0291	1.07914	82.4207	68.2226	32.0917	86.3281	81.9048	81.5722	85.7711	67.3548	33.1843	62.151	88.5427	80.7072	92.1218	89.5112	75.8319	63.5015	87.8957	78.3525	26.8698	63.9269	64.5467	83.6364	81.2301	79.7516	70.4961	72.265	49.5039	64.2054	85.3571	73.7819	61.745	76.1278	77.6275	10.5634	78.9987	42.984	70.4688	15.8151	89.2809	68.0503	27.9503	74.0969	67.0232
IMPC_ACS_003	Acoustic Startle and Pre-pulse Inhibition (PPI)	IMPC_ACS_036_001___1 point	% Pre-pulse inhibition - PPI4	IMPC_ACS_036_001	57.5728	48.0815	81.5562	68.4022	68.2358	85.3516	85.2381	77.3196	95.0249	83.6129	62.3435	83.092	90.0503	94.0718	92.1218	88.7984	76.007	74.7775	77.2812	80.0766	73.9612	25.5708	85.3857	90.0826	86.9565	85.8385	72.5849	58.7057	67.2547	81.8582	87.2619	78.1903	82.4385	74.0601	88.1374	71.831	77.8284	62.463	81.4062	68.8564	79.3758	81.5094	62.1118	81.7734	65.2406
IMPC_ACS_003	Acoustic Startle and Pre-pulse Inhibition (PPI)	IMPC_ACS_037_001___1 point	% Pre-pulse inhibition - Global	IMPC_ACS_037_001	41.8956	17.0803	76.268	43.6715	38.8907	73.3984	58.3492	65.5606	80.1144	53.1936	35.0268	54.9535	79.4573	63.6219	78.5714	74.8727	52.8722	56.276	70.4562	67.8831	-10.2632	33.79	57.438	80.686	65.4931	72.1925	59.6214	39.0678	19.2007	55.0782	71.2262	50.4756	54.3177	58.0639	59.6254	-38.3803	50.052	42.7531	58.9609	39.2336	77.5509	42.6038	26.5528	63.4319	55.9091
IMPC_BWT_001	Body Weight	IMPC_BWT_001_001___1 point	Body weight	IMPC_BWT_001_001	13.51	13.96	16.35	21.47	16.69	15.2	13.2	17.39	15.64	15.03	23.1	15.06	17.58	18.41	16.24	16.92	14.55	13.11	17.22	20.18	16.47	19.26	15.9	13.47	15.02	17.57	14.62	14.15	14.45	14.71	12.95	13.62	13.16	12.72	15.5	13.19	14.68	18.66	15.24	14.4	22.23	21.76	13.96	14.26	13.63
IMPC_BWT_001	Body Weight	IMPC_BWT_008_001___10	Body weight curve	IMPC_BWT_008_001-10	23.74	20.12	20.5	27	20.3	25.28	21.94			27.53	24.64	26.8	21.7	27.7	21.8	29.2	28.75	20.9	24.24	27	23.7	28.1	23.8	24.1	28.6	27.6	19.7	20.2	20.23	28.9	20.7	28.1	26.9					25.1	23.5	19.4
IMPC_BWT_001	Body Weight	IMPC_BWT_008_001___11	Body weight curve	IMPC_BWT_008_001-11	23.84	19.82	21.31	28.01	21.75	25.05	21.62				24.59	27.61	22.99	29.01	23.35	29.67	28.67	21.44		27.74	23.06	29.16	26.15	25.24	29.2	27.33	20.82	21.24	20.56	28.2	20.82	26.51	27.95	20.35	24.17	20.55	21.58	25.35	24.18	20.84
IMPC_BWT_001	Body Weight	IMPC_BWT_008_001___12	Body weight curve	IMPC_BWT_008_001-12				27.82	21.41	26.3	23.2			27.3		28.6	23.11			30.18			23.73	28.12		28.98				27.27	20.77	21.17		28.77	20.73		28.77	19.66			23.2	26.15	24.26	20.35
IMPC_BWT_001	Body Weight	IMPC_BWT_008_001___13	Body weight curve	IMPC_BWT_008_001-13	24.5		22.1	27.8	21.4	27	23.1	29.7	22.4	28.5	27.4	28.8	24.6	30	24	29.5	29.8		24.9	28.8	25.5	31.9	27.7	27.1	29.7	28.1	21.3	21.8	22.5	29.7	21.5	27.7	28.7	21.3	25.3	21.2	23.6	27.1	25.3
IMPC_BWT_001	Body Weight	IMPC_BWT_008_001___14	Body weight curve	IMPC_BWT_008_001-14	25.7	21.5	23.6	29.5						29		28.8	26.2	31.3	24.9	32	30.9	22.3	26.1	29.5	26.7			28.2	29.9	28.8	22.3	22		31.2	21.5	29.6	29.4		26.1	22.6	23.4	28.2	25.4	21.4
IMPC_BWT_001	Body Weight	IMPC_BWT_008_001___15	Body weight curve	IMPC_BWT_008_001-15			23	29.8	23.8	28.1	22.4	31.6	25.1	30.7	27.6	29.9	26.9			32.7	30.4	22.5	26.4	30		32.8	29.1		30.3	28.9	22.4	22.6	22.5	32.6		29.5	29.4	22.3	26.9	22.5	23.6	28.5	25.6	21.9
IMPC_BWT_001	Body Weight	IMPC_BWT_008_001___16	Body weight curve	IMPC_BWT_008_001-16	26.3	23	23	30.1	23.2								26.2	29.5	25	31.9	30.4	22.5	26.4	30.2	27.4	33.9	29.4	28.6	30	28.4	22.4	22.6		32.6	21.7		29	22.8	26.9	22.9	23.6	27.8	25.6	22.2
IMPC_BWT_001	Body Weight	IMPC_BWT_008_001___4	Body weight curve	IMPC_BWT_008_001-4	13.51	13.96	17.35			18.92	16.05	17.39	15.64	19.96		15.06	17.58	18.41	16.24	16.92	19.86	13.11	17.22	20.18		19.26		13.47		17.57	14.62	14.15	14.45	20.02	14.88	18.71	13.16	12.72	15.5	13.19	14.68	18.66	15.24	14.4
IMPC_BWT_001	Body Weight	IMPC_BWT_008_001___5	Body weight curve	IMPC_BWT_008_001-5			18.18	21.47	16.69	21.66	18.34	23.11	18.08			20.84		23.81	18.49	20.38	22.85	17.31	19.31	21.49	17.81	23.55	18.05	18.95	22.06	20.52	16.32		16.85	23.55	16.44	22.07	20.17	16.14	19.36	17.32	18.48	20.44	19.87	16.9
IMPC_BWT_001	Body Weight	IMPC_BWT_008_001___6	Body weight curve	IMPC_BWT_008_001-6	19.86	18.09	18.08	23.78	16.84	23.39	19.41	24.88	19.24			23.05	19.06	25.26	19.11	23.42	25.25	18.15	20.75	23.08		24.26	19.68	21.02	24.03	23.16	17.09	16.9	18.04			23.18	21.77	17.11	20.86	18.24	18.6	21.62	20.98	16.94
IMPC_BWT_001	Body Weight	IMPC_BWT_008_001___7	Body weight curve	IMPC_BWT_008_001-7	21.9			25.21	18.08	25.12	20.81	25.61	19.87			24.06	20.89			25.61	26.88	18.95	21.62	23.99	20.36	25.71			26.13	24.61		18.62	18.13	23.97	19.26	24.31	23.64	17.08	21.44	18.61		22.86	21.85	17.43
IMPC_BWT_001	Body Weight	IMPC_BWT_008_001___8	Body weight curve	IMPC_BWT_008_001-8				26.37	19.39			27.2	21.3	25.5		24.4		25.85	21.28	27.19	30			25.53	21.26	26.28	22.86	22.55		25.53	18.67	18.69	17.8	27.91	19.23		25.54	18.12	23	19.8	20.3	23.48	22.47	18.33
IMPC_BWT_001	Body Weight	IMPC_BWT_008_001___9	Body weight curve	IMPC_BWT_008_001-9	22.7	19.6	20.3	27.3	20.2	22.9	21				23.1		21.2	26.7	21.6	27.1	28.3	19.2	22.8	26.5	23.4	27.6	25	23.2	26.5	26	19.3	19.4	19.1	27.4	19.8	25.6	26.3	19.8	23	20.6	21.7	24.5	22.9	18.6
IMPC_CAL_003	Indirect Calorimetry	IMPC_CAL_001_001___1 point	Body weight before experiment	IMPC_CAL_001_001	23.74	20.12	21.31	28.01	21.75	25.28	21.94			27.53	24.64	27.13	22.99	29.19	23.5	29.67	28.75	20.99	24.24	27.74	23.06				29.2	27.33	20.82	21.24	20.23	28.2	20.82	26.7	27.95	20.35	24.23	21.31	22.31	25.35	24.18	20.84	29.87	29.52
IMPC_CAL_003	Indirect Calorimetry	IMPC_CAL_002_001___1 point	Body weight after experiment	IMPC_CAL_002_001	24.18	21.2	21.29	26.42	21.13	25.27	21.88			27.58	24.66	23.78	20.22	28.4	23.16	28.98	28.97	20.87	22.68	27.9	22				26.71	28.22	18.46	18.57	20.92	29.67	20.86	27.67	28.36	22.16	21.3	22.46	19	25.88	24.91	20.91	30.1	29.63
IMPC_CAL_003	Indirect Calorimetry	IMPC_CAL_008_001___1 point	Total food intake	IMPC_CAL_008_001	3.78		3.08				2.59																		2.51	3.72	2.26	1.32	3.38	3.15	2.94			4.48	1.76							2.78
IMPC_CAL_003	Indirect Calorimetry	IMPC_CAL_017_001___1 point	Respiratory Exchange Ratio	IMPC_CAL_017_001	0.944538	0.999217	0.882817	0.900145	0.9182	0.941511	0.916681			0.901826	0.891591	0.894379	0.834514	0.893885	0.95881	0.941336	0.921056	0.914553	0.841295	0.90819	0.849252				0.878212	0.917665	0.894243	0.841342	0.93306	0.885772	0.894243	0.901122	0.944565	0.993293	0.845174	0.939053	0.829816	0.939098	0.939203	0.916215	0.915902	0.852944
IMPC_CBC_003	Clinical Chemistry	IMPC_CBC_001_001___1 point	Sodium	IMPC_CBC_001_001	151.3	147.6	143.1	148	146.8	150.2	146.7	147.6	142.3	149.3	148	147.5	151.9	146.9	146.5	150.6	148.7	145.3	148.5	150.4	145.4	154	150.2	148.4	145	154	151	151	150	148.9	148.5	148.3	147.5	151.6	142.4	143.6	150.5	151.4	148.7	147.1	154	153.7	149.1	148.8	148.9
IMPC_CBC_003	Clinical Chemistry	IMPC_CBC_002_001___1 point	Potassium	IMPC_CBC_002_001	4.54	4.87	4.47	4.6	4.8	5.22	5.08	5.2	4.52	4.58	4.76	4.57	4.02	4.79	4.51	4.95	4.85	4.34	4.49	4.85	4.73	4.42	5.15	4.35	5.8	5.4	5.3	5	4.8	4.85	4.91	5.51	5.49	5.05	5.2	4.85	4.93	4.91	4.74	5.3	4.59	5.04	4.95	4.55	4.35
IMPC_CBC_003	Clinical Chemistry	IMPC_CBC_003_001___1 point	Chloride	IMPC_CBC_003_001	112.6	112.2	110.2	111.5	111	109.7	114.1	112.3	109.2	109.5	114.3	109.1	112	111.4	112.2	111.7	110	108.8	110.4	110.5	111.4	114.7	113.8	114.5	110.1	116.2	115.8	116.2	116.4	110.7	113.5	113.3	112	114.3	107.1	109.1	112	113.6	110.9	111.6	113.2	112	112.6	113.5	113.3
IMPC_CBC_003	Clinical Chemistry	IMPC_CBC_004_001___1 point	Urea (Blood Urea Nitrogen - BUN)	IMPC_CBC_004_001	21.9	21.9	19.9	20.6	19.5	23.5	26.1	20.9	20.5	25.7	22.3	25.8	24.2	21.2	27.3	24.3	22.1	15.8	17.2	22.2	24.6	18.8	21.9	25.6	20.5	28.1	15.3	20.6	30.2	21.8	25.6	20	23.9	20	20.7	16.1	23.9	24.4	24.4	35.8	27.6	28.3	31.2	30.5	26.9
IMPC_CBC_003	Clinical Chemistry	IMPC_CBC_005_001___1 point	Creatinine	IMPC_CBC_005_001	0.1834	0.2026	0.1865	0.2142	0.2224	0.2043	0.1951	0.1805	0.1708	0.2177	0.161	0.1606	0.1814	0.145	0.1529	0.1044	0.1245	0.1931	0.1189	0.1249	0.1423	0.1531	0.157	0.151	0.108		0.15	0.18	0.127	0.2229	0.1925	0.226	0.1654	0.2315	0.2131	0.2357	0.243	0.2008	0.2154	0.2382	0.1774	0.2154	0.1979	0.2083	0.2602
IMPC_CBC_003	Clinical Chemistry	IMPC_CBC_006_001___1 point	Total protein	IMPC_CBC_006_001	51.9	54.4	48.4	47	47.3	56.4	54.4	48.2	49.2	56.2	50.9	50.3	49.3	47.7	47.7	52.4	51.4	49.7	52.6	52.3	54.2	49.7	55.5	53.2	50	48	53	47	47	53.9	51.2	52.5	45.9	47.4	50.3	47.8	53.7	51.3	50.5	50.5	52.4	51.6	51.7	53.9	52.4
IMPC_CBC_003	Clinical Chemistry	IMPC_CBC_007_001___1 point	Albumin	IMPC_CBC_007_001	28.2	30.9	29.9	26.8	30.1	31.1	32.4	27.8	31.3	30.3	29.7	26.9	29.7	27.9	30.2	28.1	27.7	28.6	30.4	28.7	31.1	29.5	32.5	27	27.3	27	32.8	30.4	30.2	29.5	30.2	30.9	25.3	30.7	29.6	29.6	30.1	29.3	27.8	29.9	28.9	28.3	29.9	29.6	30
IMPC_CBC_003	Clinical Chemistry	IMPC_CBC_008_001___1 point	Total bilirubin	IMPC_CBC_008_001	0.09	0.1	0.13	0.12	0.09	0.11	0.12	0.11	0.1	0.11	0.11	0.08	0.11	0.1	0.1	0.11	0.13	0.11	0.11	0.09	0.1	0.14	0.12	0.11	0.12	0.13		0.17	0.11	0.13	0.12	0.12	0.13	0.18	0.14	0.12	0.11	0.09	0.09	0.15	0.09	0.12	0.11	0.1	0.1
IMPC_CBC_003	Clinical Chemistry	IMPC_CBC_009_001___1 point	Calcium	IMPC_CBC_009_001	9.424	9.417	9.235	9.715	9.297	9.445	9.008	9.116	8.881	9.874	9.455	9.442	9.444	9.58	9.511	9.388	9.221	9.681	9.548	9.484	9.301	9.319	9.235	9.027	9.78	10.24	9.81	10.16	9.51	9.844	9.539	9.597	9.985	9.908	9.401	9.317	9.443	9.405	9.442	9.699	9.388	9.653	9.322	9.384	9.564
IMPC_CBC_003	Clinical Chemistry	IMPC_CBC_010_001___1 point	Phosphorus	IMPC_CBC_010_001	4.99	6.23	5.48	6.05	6.11	5.02	4.66	6.15	5.88	4.68	4.41	6.07	6.75	6.02	5.77	5.64	5.14	4.99	5.48	5.29	5.88	4.99	4.84	4.78	6.5	5.9	5.5	6.1	6.5	4.96	5.3	5.38	7.44	6.23	4.92	4.26	5.79	5.18	4.36	8.07	5.28	5.57	5.95	4.97	5.41
IMPC_CBC_003	Clinical Chemistry	IMPC_CBC_012_001___1 point	Aspartate aminotransferase	IMPC_CBC_012_001	39.8	47.8	70.4	37.8	40.7	60.3	51.3	67.2	40.2	47.1	41.8	33.8	42.4	34.6	40.4	37.9	67	60.4	45.5	42.6	54.4	60.1	62.7	51.6	43	81	63	78	61	50.1	46.5	167.8	137.3	109.1	45.8	44.6	46.3	39.2	36.2	91.4	79.6	39.6	105.1	76.2	59
IMPC_CBC_003	Clinical Chemistry	IMPC_CBC_013_001___1 point	Alanine aminotransferase	IMPC_CBC_013_001	22.4	21.3	32.8	20	14.9	28.4	21.5	26.9	18.8	38.6	17.9	21.9	21.3	19	21.1	20.1	20.3	18.7	15.3	22.5	18.4	39.5	22.8	15.6	22	34	22	34	23	32.6	22.5	83.3	68.9	110.1	33.3	20	28.1	41.4	21.8	41.7	28.7	21.6	47.3	24.9	21.1
IMPC_CBC_003	Clinical Chemistry	IMPC_CBC_014_001___1 point	Alkaline phosphatase	IMPC_CBC_014_001	64.3	83.2	82.8	59	84.6	52.3	93.4	48.5	60.3	62.4	82.3	47.5	89.1	55.2	90.6	64.8	51.2	82.8	87.4	44.6	67.8	47.7	89.9	61.6	47	41	82	76	99	42.7	71.1	64.2	54.6	105.1	62.5	98.6	111.6	49.8	52	83.5	49.7	46.9	94	103	96.2
IMPC_CBC_003	Clinical Chemistry	IMPC_CBC_015_001___1 point	Total cholesterol	IMPC_CBC_015_001	118.8	98.3	94	118.5	96.5	130	95	103.3	98.4	159.7	107.8	97.8	105.8	129.5	99.6	137.8	124.5	88.2	105.2	139.2	112.8	135.5	125	107.5	101.9	110.6	114	96.5	98.3	123.5	90.4	126	113.6	111.9	129.5	96.7	98	123.7	121	89.1	128.5	133	103	92.3	91
IMPC_CBC_003	Clinical Chemistry	IMPC_CBC_016_001___1 point	HDL-cholesterol	IMPC_CBC_016_001	64.7	48	47.3	64.6	42.6	70.2	49.8	55	46.6	83	47	59.4	51.7	65	45.7	73.6	69.5	42.1	49.7	68.2	52.5	68.4	65.1	72.4	53.7	61.6	52.7	44.8	46	65.9	43.1	63.4	65.1	56.4	73.1	52.2	54.5	69.8	64	45.9	75.5	76.9	53.4	48	47
IMPC_CBC_003	Clinical Chemistry	IMPC_CBC_999_999___1 point	Non-HDL-cholesterol	IMPC_CBC_999_999	54.1	50.3	46.7	53.9	53.9	59.8	45.2	48.3	51.8	76.7	60.8	38.4	54.1	64.5	53.9	64.2	55	46.1	55.5	71	60.3	67.1	59.9	35.1	48.2	49	61.3	51.7	52.3	57.6	47.3	62.6	48.5	55.5	56.4	44.5	43.5	53.9	57	43.2	53	56.1	49.6	44.3	44
IMPC_CBC_003	Clinical Chemistry	IMPC_CBC_017_001___1 point	Triglycerides	IMPC_CBC_017_001	119.4	76.1	70.8	123.7	64.1	173.4	102	82.4	72.9	125.7	113.4	125.2	88	123.3	92.5	204.7	166.6	79.6	55.8	120.7	60.7	62.3	55.7	70.7	80.8	89.3	70.4	80.7	104.7	81	93.6	87.9	72.3	74	85.9	49.7	90.5	120.7	123.2	67.3	176.1	139.5	97.9	109.7	95.5
IMPC_CBC_003	Clinical Chemistry	IMPC_CBC_018_001___1 point	Glucose	IMPC_CBC_018_001	208.2	199.5	220.5	283.3	253.9	231.6	225.7	240	230.9	246.6	228.5	211	182.9	244.2	216	211.7	219.8	217.6	200.5	209.8	191.8	274	213.2	239.5	227.6	256.9	242.2	251.3	193.6	246	222.8	237.2	217.7	209.8	258.2	177.4	169.8	224.7	218.8	209.8	212.7	239.5	186.7	197.9	233.2
IMPC_CBC_003	Clinical Chemistry	IMPC_CBC_058_001___1 point	Cholesterol ratio	IMPC_CBC_058_001	1.83617	2.04792	1.98731	1.83437	2.26526	1.85185	1.90763	1.87818	2.11159	1.9241	2.29362	1.64646	2.04642	1.99231	2.17943	1.87228	1.79137	2.09501	2.1167	2.04106	2.14857	1.98099	1.92012	1.48481	1.89758	1.79545	2.16319	2.15402	2.13696	1.87405	2.09745	1.98738	1.74501	1.98404	1.77155	1.85249	1.79817	1.77221	1.89062	1.94118	1.70199	1.72952	1.92884	1.92292	1.93617
IMPC_CSD_003	Combined SHIRPA and Dysmorphology	IMPC_CSD_032_001___1 point	Locomotor activity	IMPC_CSD_032_001	28	17	23	20	21	18	23	33	20	12	27	24	26	21	32	31	26	16	20	16	19	28	35	38	30	22	35	21	27	45	40	25	20	16	27	26	22	22	30	17	11	26	14	14	28
IMPC_DXA_001	Body Composition (DEXA lean/fat)	IMPC_DXA_001_001___1 point	Body weight	IMPC_DXA_001_001	25.7	21.5	23.1	29.5	23.3	27	23.1			28.5	27.4	28.8	26.2	30.5	26	32	30.5	22.3		29.5	25.5	31.9	28	27.1	29.9	28.8	22.3	22	22.7	31.2	21.5	29.6	29.4	21.7	26.1	22.6	23.6	28.2	25.4	21.4	31.3	31.7	21.2	21.8	19.7
IMPC_DXA_001	Body Composition (DEXA lean/fat)	IMPC_DXA_002_001___1 point	Fat mass	IMPC_DXA_002_001	4.592	3.357	3.522	4.869	3.778	4.841	3.706			6.224	6.739	4.286	5.65	5.988	5.363	5.911	5.415	3.768		8.209	5.311	5.735	8.258	5.23	3.951	4.617	4.056	3.594	3.744	6.163	3.357	7.366	4.743	4.192	5.67	4.185	3.924	7.127	5.149	3.687	7.413	6.857	3.687	3.763	3.198
IMPC_DXA_001	Body Composition (DEXA lean/fat)	IMPC_DXA_003_001___1 point	Lean mass	IMPC_DXA_003_001	20.228	17.363	18.218	24.461	17.812	21.759	18.224			22.066	19.381	23.914	19.35	22.662	20.927	25.529	25.705	18.662		21.861	19.509	24.935	19.362	21.32	25.099	22.543	16.744	16.826	17.526	24.347	17.363	21.634	24.357	16.458	19.53	16.845	18.246	21.043	18.911	17.623	23.347	24.743	16.463	16.467	15.182
IMPC_DXA_001	Body Composition (DEXA lean/fat)	IMPC_DXA_004_001___1 point	Bone Mineral Density (excluding skull)	IMPC_DXA_004_001	0.0514	0.0505	0.0509	0.0539	0.0514	0.0504	0.0507			0.0505	0.051	0.0526	0.0512	0.0521	0.0504	0.054	0.0547	0.0505		0.0498	0.0507	0.0543	0.0505	0.05	0.0549	0.0536	0.0504	0.0516	0.0495	0.0524	0.0511	0.0498	0.0518	0.0489	0.0473	0.0499	0.0495	0.0483	0.0486	0.0483	0.0525	0.0534	0.0483	0.0485	0.0491
IMPC_DXA_001	Body Composition (DEXA lean/fat)	IMPC_DXA_005_001___1 point	Bone Mineral Content (excluding skull)	IMPC_DXA_005_001	0.4543	0.4616	0.448	0.5165	0.438	0.4524	0.4546			0.4622	0.4389	0.4812	0.4534	0.4756	0.4646	0.5019	0.5423	0.4643		0.4096	0.4483	0.5342	0.4125	0.445	0.5294	0.4875	0.4295	0.4499	0.4248	0.4755	0.433	0.4318	0.5056	0.3764	0.3943	0.4337	0.4341	0.3994	0.4167	0.4144	0.4603	0.487	0.3942	0.4062	0.3972
IMPC_DXA_001	Body Composition (DEXA lean/fat)	IMPC_DXA_006_001___1 point	Body length	IMPC_DXA_006_001	9.2	9	9.1	9.7	9	9.4	9.2			9.5	9.3	9.8	9.2	9.9	9.3	9.7	9.7	9.3		9.5	9.5	10	9.6	9.5	9.8	9.6	9	9.2	9.1	9.8	9	9.4	9.6	8.9	9.2	9	9	9.2	9.1	8.9	9.6	9.6	9	9	8.8
IMPC_DXA_001	Body Composition (DEXA lean/fat)	IMPC_DXA_007_001___1 point	BMC/Body weight	IMPC_DXA_007_001	0.0177	0.0215	0.0194	0.0175	0.0188	0.0168	0.0197			0.0162	0.016	0.0167	0.0173	0.0156	0.0179	0.0157	0.0178	0.0208		0.0139	0.0176	0.0167	0.0147	0.0164	0.0177	0.0169	0.0193	0.0204	0.0187	0.0152	0.0201	0.0146	0.0172	0.0173	0.0151	0.0192	0.0184	0.0142	0.0164	0.0194	0.0147	0.0154	0.0186	0.0186	0.0202
IMPC_DXA_001	Body Composition (DEXA lean/fat)	IMPC_DXA_008_001___1 point	Lean/Body weight	IMPC_DXA_008_001	0.787082	0.807581	0.788658	0.829186	0.764464	0.805889	0.788918			0.774246	0.707336	0.830347	0.73855	0.743016	0.804885	0.797781	0.842787	0.836861		0.741051	0.765059	0.781661	0.6915	0.786716	0.839431	0.782743	0.750852	0.764818	0.77207	0.780353	0.807581	0.730878	0.828469	0.758433	0.748276	0.745354	0.773136	0.746206	0.744528	0.823505	0.745911	0.780536	0.776557	0.755367	0.77066
IMPC_DXA_001	Body Composition (DEXA lean/fat)	IMPC_DXA_009_001___1 point	Fat/Body weight	IMPC_DXA_009_001	0.178677	0.15614	0.152468	0.165051	0.162146	0.179296	0.160433			0.218386	0.245949	0.148819	0.215649	0.196328	0.206269	0.184719	0.177541	0.168969		0.278271	0.208275	0.179781	0.294929	0.192989	0.13214	0.160312	0.181883	0.163364	0.164934	0.197532	0.15614	0.248851	0.161327	0.19318	0.217241	0.185177	0.166271	0.252731	0.202717	0.17229	0.236837	0.216309	0.173915	0.172615	0.162335
IMPC_DXA_001	Body Composition (DEXA lean/fat)	IMPC_DXA_010_001___1 point	Bone Area	IMPC_DXA_010_001	8.83852	9.14059	8.80157	9.58256	8.5214	8.97619	8.96647			9.15248	8.60588	9.14829	8.85547	9.1286	9.21825	9.29444	9.91408	9.19406		8.2249	8.84221	9.83794	8.16832	8.9	9.64299	9.09515	8.52183	8.71899	8.58182	9.07443	8.47358	8.67068	9.76062	7.69734	8.33615	8.69138	8.7697	8.26915	8.57407	8.57971	8.76762	9.11985	8.16149	8.37526	8.08961
IMPC_ECG_002	Electrocardiogram (ECG)	IMPC_ECG_001_001___1 point	Number of signals	IMPC_ECG_001_001	61	82	47	38	62	48	61	52	48	45	33	42	63	90	49	55	55	30	80	39	51	83	75	42	58	25	41	69	46	78	37	71	47	39	44	60	40	37	25	60	34	43	42	68	70
IMPC_ECG_002	Electrocardiogram (ECG)	IMPC_ECG_002_001___1 point	HR	IMPC_ECG_002_001	732	794	801	802	793	769	765	835	791	750	745	724	740	735	759	754	785	768	774	693	757	757	787	802	711	773	794	804	759	814	768	769	788	763	774	767	780	761	767	773	786	761	774	777	780
IMPC_ECG_002	Electrocardiogram (ECG)	IMPC_ECG_003_001___1 point	CV	IMPC_ECG_003_001	4.15	2.57	1.25	2.65	2.41	3.32	6.41	1.29	1.98	2.34	3.55	3.83	5.77	1.25	1.61	3.67	3.93	3.74	2.58	3.48	4.05	3.7	1.99	0.6	4.71	3.45	3.78	2.48	1.6	4.09	12.77	1.93	1.22	3.42	1.26	2.61	3.89	5.72	1.8	2.32	0.85	2.34	2.03	2.55	3.09
IMPC_ECG_002	Electrocardiogram (ECG)	IMPC_ECG_004_001___1 point	RR	IMPC_ECG_004_001	82.1	75.6	74.9	74.9	75.7	78.1	78.7	71.9	75.9	80	80.6	83	81.4	81.7	79.1	79.7	76.5	78.2	77.6	86.7	79.3	79.4	76.2	74.8	84.6	77.7	75.7	74.6	79	73.9	78.9	78	76.2	78.7	77.6	78.3	77	79.1	78.3	77.6	76.3	78.9	77.6	77.3	77
IMPC_ECG_002	Electrocardiogram (ECG)	IMPC_ECG_005_001___1 point	PQ	IMPC_ECG_005_001	22.4	21.5	15.9	15.4	21.7	21.7	17.5	20.5	20.6	20.2	20.1	15.9	20.1	18.9	17.8	15.7	20.2	22.3	23.3	20.2	20.2	23.4	22.9	16.9	20.1	21.2	15.9	20.4	17	18.6	14.6	22.4	18.3	22.3	21.2	21.2	23.3	21.2	21	22.5	20	21.5	18.2	22.4	22.6
IMPC_ECG_002	Electrocardiogram (ECG)	IMPC_ECG_006_001___1 point	PR	IMPC_ECG_006_001	29.6	28.3	22.6	22.5	28.9	29	23.9	27.3	27.8	28	27.6	23.1	26.5	25.9	24.6	23.2	27.4	29.3	31	27.7	27.9	30.6	30	24.5	27.2	28.7	22.4	26.7	21.8	25.3	21.3	29.2	25.1	29.4	28.1	27	30.7	28.6	28.1	30.4	25.6	29.1	23.6	29.6	28.9
IMPC_ECG_002	Electrocardiogram (ECG)	IMPC_ECG_007_001___1 point	QRS	IMPC_ECG_007_001	11	10.3	11.3	10.8	10.9	11.2	10.2	10.4	11.2	11.8	11.2	10.6	10.6	10.3	10.7	11.5	10.8	10.5	11.5	11.2	11.3	11.1	10.8	11.9	10.7	10.9	10	9.5	9.2	10	10.8	11.1	11.5	10.9	10.4	9.1	12.5	11.2	10.8	12.2	10.3	11.3	10	11	9.8
IMPC_ECG_002	Electrocardiogram (ECG)	IMPC_ECG_008_001___1 point	ST	IMPC_ECG_008_001	29.6	28.8	26.8	25.9	27.4	29	27.8	29.8	32.9	30.4	28.4	33.5	30.1	28.7	30	30.5	31.7	28.6	29.8	32.6	30.3	31.1	29.1	28.8	31.9	33	28.5	30.5	33.3	29.6	28.8	31.8	29	31.5	30.3	31.3	31.3	29.1	31.2	27.2	29.8	28.5	30.9	29.1	29
IMPC_ECG_001	Electrocardiogram (ECG)	IMPC_ECG_009_001___1 point	QTc	IMPC_ECG_009_001	44.3	44.4	43.5	41.9	43.5	44.8	42.3			46.6	43.7	47.9	44.6	42.6	45.2	46.5	48	43.6			46.1				45.8	49.2	43.7	45.7	47.2	45.5	44	47.9	45.9	47.2	45.6	45.1	49.4	44.8	46.9	44.2	45.3	44.3	45.9	45	43.8
IMPC_ECG_002	Electrocardiogram (ECG)	IMPC_ECG_010_001___1 point	HRV	IMPC_ECG_010_001	30.4	20.4	10	21.2	19.1	25.5	49.1	10.8	15.7	17.5	26.5	27.8	42.7	9.2	12.2	27.7	30.9	28.7	20	24.1	30.6	28	15.7	4.8	33.5	26.7	30	19.9	12.1	33.2	98	14.9	9.6	26.1	9.7	20.1	30.4	43.5	13.8	17.9	6.7	17.8	15.7	19.8	24.1
IMPC_ECG_002	Electrocardiogram (ECG)	IMPC_ECG_011_001___1 point	QTc Dispersion	IMPC_ECG_011_001	31.2	29.7	20.8	29	27.3	31.9	27	27.7	10.2	24.6	23.3	23.2	26.7	30.6	26.2	26.2	18.5	36.2	21.5	29.2	25.4	28.8	29.8	24.1	24.9	15.4	17.6	29.1	19.9	26.7	31.8	30.2	28.5	19.3	25.6	30.8	16.3	24.8	16.5	24.5	24.4	28.8	29.2	32.2	27.7
IMPC_ECG_002	Electrocardiogram (ECG)	IMPC_ECG_012_001___1 point	Mean SR amplitude	IMPC_ECG_012_001	1.67	1.24	0.67	0.71	1.15	1.08	1.39	1.14	1.2	1.05	0.78	1.04	1.29	0.67	0.83	0.56	0.82	0.85	0.73	0.95	1.24	1.32	1.02	0.67	0.21376	0.13952	0.12912	0.20633	1	0.75	0.27	1.74	1.21	1.04	1.54	0.76	0.98	1.17	1.63	1.3	1.08	0.93	1.03	0.81	1.06
IMPC_ECG_002	Electrocardiogram (ECG)	IMPC_ECG_013_001___1 point	Mean R amplitude	IMPC_ECG_013_001	1.29	0.93	0.54	0.45	0.74	0.76	0.96	0.92	0.95	0.85	0.55	0.8	1.06	0.3	0.5	0.51	0.57	0.55	0.52	0.74	0.83	1.04	0.69	0.48	0.1182	0.0966	0.0831	0.14409	0.8	0.46	0.17	0.98	0.87	0.61	0.97	0.47	0.83	1.05	1.17	0.76	0.8	0.75	0.81	0.45	0.7
IMPC_ECG_002	Electrocardiogram (ECG)	IMPC_ECG_014_001___1 point	rMSSD	IMPC_ECG_014_001	2.51	1.1	0.93	1.16	1	1.38	2.09	0.58	0.85	1.44	1.59	2.1	2.57	0.72	0.95	1.15	2.03	1.73	1.28	2.21	2.06	1.6	1.02	0.52	3.34	1.4	1.53	0.76	1.28	1.63	5.89	1.12	0.83	1.95	1.03	1.78	1.36	1.41	1.08	0.97	0.59	1.41	1.06	1.26	1.14
IMPC_ECG_002	Electrocardiogram (ECG)	IMPC_ECG_015_001___1 point	pNN5(6>ms)	IMPC_ECG_015_001	5	4.94					28.33	0	0		6.25	7.32	20.97					3.45	0	5.26	4	1.22	0	0	12.28	0	2.5	0	0	5.19	11.11	0	0	2.63	0	0	10.26	11.11						1.49	1.45
IMPC_GRS_001	Grip Strength	IMPC_GRS_001_001___1	Forelimb grip strength measurement	IMPC_GRS_001_001-1	106.8	119.5	114	136	127	123.5	121	99.1	99.1	100.8	114.4	114.4	134.2	122	133	97.4	107.6	95.7	93.2	116.9	138.2	99.6		115.2	139.8	129.7	114.4	125.4	118.6	143.2	103	109.3	131.4	102.5	128.4	101.7	109.7	124.6	86.4	96.6	139.4	107.6	101.3	99.1	128.8
IMPC_GRS_001	Grip Strength	IMPC_GRS_001_001___2	Forelimb grip strength measurement	IMPC_GRS_001_001-2	120.3	103.8	137.3	128.8	104.6	137.3	111.7	103.4	92.8	95.7	130.5	132.6	120.8	109.7	123.3	127.1	108.9	100.4	94.1	115.2	128.8	91.5		130.1	125	142	110.2	100.8	107.6	151.3	119.1	105.1	111	80.5	92.8	108	110.6	114.4	97.4	118.2	108.5	129.2	130.9	101.3	72.4
IMPC_GRS_001	Grip Strength	IMPC_GRS_001_001___3	Forelimb grip strength measurement	IMPC_GRS_001_001-3	120.3	114.4	133	121.2	109.3	117.7	106.8	117.8	139	111.9	120.8	114.8	113.1	114	122	121.6	116.9	104.2	100	116.9	109.3	113.1		110.6	116.9	138.6	108.5	88.5	84.7	158.1	129.7	123.3	145.8	131.4	124.1	108.5	103.1	106.3	117.8	105.1	125.8	142.4	106.3	120.3	98.7
IMPC_GRS_001	Grip Strength	IMPC_GRS_002_001___1	Forelimb and hindlimb grip strength measurement	IMPC_GRS_002_001-1	167	226.3	160.2	242.3	247.3	235.2	203.1	191.1	147.5	191.1	211.5	242.4	160.2	214	253.4	193.2	208.5	208.9	165.7	197.5	229.3	208.9		177.1	178	181.4	156.8	183.9	156.4	245.4	145.8	231.4	194.1	150	207.7	226.7	211.2	222.1	225.9	177.1	217.8	235.2	169.5	159.8	146.2
IMPC_GRS_001	Grip Strength	IMPC_GRS_002_001___2	Forelimb and hindlimb grip strength measurement	IMPC_GRS_002_001-2	219.9	228.4	224.6	208.5	184.3	210.6	187.6	212.3	198.8	186.5	170.4	244.1	235.2	205.1	238.6	193.2	235.2	177.6	168.7	219.5	214	190.7		208.5	169.1	217	257.7	131.8	144.1	241.1	232.7	174.6	179.3	141.5	194.5	216.1	204.3	239.4	169.9	199.2	164.6	154.7	187.7	245	136
IMPC_GRS_001	Grip Strength	IMPC_GRS_002_001___3	Forelimb and hindlimb grip strength measurement	IMPC_GRS_002_001-3	213.2	235.6	215.7	205.5	185.2	200.7	176.3	214.4	228.8	194.1	212.3	185.2	172	259.4	297.1	213.6	222.9	182.2	170.8	202.1	222.1	261.1		222.1	190.7	181.4	175	222.9	190.7	275	192	197.5	246.6	170.8	182.2	145.3	199.3	163.1	170.4	192.8	265.3	248.3	248.8	193.2	145.8
IMPC_GRS_001	Grip Strength	IMPC_GRS_003_001___1 point	Body weight	IMPC_GRS_003_001	22.7	19.6	20.3	27.3	20.2	25.9	21	27.2	21.3	25.5	23.1	24.4	21.2	26.7	21.6	27.1	30	19.2	22.8	26.5	23.4	27.6		23.2	26.5	26	19.3	19.4	17.8	27.4	19.8	25.6	26.3	19.8	23	19.8	20.3	24.5	22.9	18.6	28	27.8	20	18.8	18.1
IMPC_GRS_001	Grip Strength	IMPC_GRS_008_001___1 point	Forelimb grip strength measurement mean	IMPC_GRS_008_001	115.8	112.567	128.1	128.667	113.633	126.167	113.167	106.767	110.3	102.8	121.9	120.6	122.7	115.233	126.1	115.367	111.133	100.1	95.7667	116.333	125.433	101.4		118.633	127.233	136.767	111.033	104.9	103.633	150.867	117.267	112.567	129.4	104.8	115.1	106.067	107.8	115.1	100.533	106.633	124.567	126.4	112.833	106.9	99.9667
IMPC_GRS_001	Grip Strength	IMPC_GRS_009_001___1 point	Forelimb and hindlimb grip strength measurement mean	IMPC_GRS_009_001	200.033	230.1	200.167	218.767	205.6	215.5	189	205.933	191.7	190.567	198.067	223.9	189.133	226.167	263.033	200	222.2	189.567	168.4	206.367	221.8	220.233		202.567	179.267	193.267	196.5	179.533	163.733	253.833	190.167	201.167	206.667	154.1	194.8	196.033	204.933	208.2	188.733	189.7	215.9	212.733	202	199.333	142.667
IMPC_GRS_001	Grip Strength	IMPC_GRS_010_001___1 point	Forelimb grip strength normalised against body weight	IMPC_GRS_010_001	5.10132	5.7432	6.31034	4.71306	5.62541	4.8713	5.38889	3.92524	5.1784	4.03137	5.27706	4.94262	5.78774	4.31585	5.83796	4.25707	3.70444	5.21354	4.20029	4.38994	5.3604	3.67391		5.11351	4.80126	5.26026	5.75302	5.40722	5.8221	5.50608	5.92256	4.39714	4.92015	5.29293	5.00435	5.3569	5.31034	4.69796	4.3901	5.73297	4.44881	4.54676	5.64167	5.68617	5.52302
IMPC_GRS_001	Grip Strength	IMPC_GRS_011_001___1 point	Forelimb and hindlimb grip strength normalised against body weight	IMPC_GRS_011_001	8.81204	11.7398	9.86043	8.01343	10.1782	8.32046	9	7.57108	9	7.4732	8.57431	9.17623	8.92138	8.47066	12.1775	7.38007	7.40667	9.87326	7.38596	7.78742	9.47863	7.97947		8.73132	6.76478	7.43333	10.1813	9.2543	9.1985	9.26399	9.60438	7.85807	7.85805	7.78283	8.46956	9.90067	10.0952	8.49796	8.24163	10.1989	7.71071	7.65228	10.1	10.6028	7.88214
IMPC_HEM_002	Hematology	IMPC_HEM_001_001___1 point	White blood cell count	IMPC_HEM_001_001	16.48	14.3	11.74	12.04	9.42	12.72	4.98	14.88		8.06	12.42	12.22	10	7.46	6.74	9.82	10.68	9.76	9.78	11.5	10.08		9		11.84	16.3	12.22	12.22	8.66	11.34	9.62	9.78	7.8	3.32	12.66	12.84	12.7		12.1	11.36
IMPC_HEM_002	Hematology	IMPC_HEM_002_001___1 point	Red blood cell count	IMPC_HEM_002_001	11.77	11.17	11.6	10.41	11.06	11.48	11.51	11.79		12.43	11.9	11.02	11.05	11.35	10.78	10.65	10.87	11.35	10.85	11.03	10.4		10.78		11.24	11.78	11.47	10.48	11.43	12	11.66	12.06	11.02	10.9	12.29	11.76	12.59		11.78	9.92
IMPC_HEM_002	Hematology	IMPC_HEM_003_001___1 point	Hemoglobin	IMPC_HEM_003_001	15.1	15.5	16.1	14.3	15.5	15	15.9	16.1		17.4	16.9	14.7	15.8	15.7	15.4	15	15.7	16.3	15.5	16.3	14.7		14.1		15.4	15.8	15.3	14.5	15.4	14.5	14.7	15.3	14.2	14.9	16.4	15.4	16.5		14.4	15.6
IMPC_HEM_002	Hematology	IMPC_HEM_004_001___1 point	Hematocrit	IMPC_HEM_004_001	49	47.5	49.4	50.9	51.6	50.6	47.8	50.9		50.8	49.7	44.6	46.6	52.6	51	52.7	51	53	49.5	50.6	48.8		49.7		53.5	52.4	52.5	50	52.8	57.2	56.3	57.9	51.9	51	56.3	54.8	58.4		55.4	47.5
IMPC_HEM_002	Hematology	IMPC_HEM_005_001___1 point	Mean cell volume	IMPC_HEM_005_001	41.6	42.5	42.6	48.9	46.7	44.1	41.5	43.2		40.9	41.8	40.5	42.2	46.3	47.3	49.5	46.9	46.7	45.6	45.9	46.9		46.1		47.6	44.5	45.8	47.7	46.2	47.7	48.3	48	47.1	46.8	45.8	46.6	46.4		47	47.9
IMPC_HEM_002	Hematology	IMPC_HEM_006_001___1 point	Mean corpuscular hemoglobin	IMPC_HEM_006_001	12.8	13.9	13.9	13.7	14	13.1	13.8	13.7		14	14.2	13.3	14.3	13.8	14.3	14.1	14.4	14.4	14.3	14.8	14.1		13.1		13.7	13.4	13.3	13.8	13.5	12.1	12.6	12.7	12.9	13.7	13.3	13.1	13.1		12.2	15.7
IMPC_HEM_002	Hematology	IMPC_HEM_007_001___1 point	Mean cell hemoglobin concentration	IMPC_HEM_007_001	30.8	32.6	32.6	31.2	32.6	31.5	33.3	34.3		34.3	34	33	33.9	29.8	30.2	28.5	30.8	30.8	31.1	32.2	30.1		28.4		28.8	30.2	29.1	29	29.2	25.3	26.1	26.4	27.4	29.2	29.1	28.1	28.3		26	32.8
IMPC_HEM_002	Hematology	IMPC_HEM_008_001___1 point	Platelet count	IMPC_HEM_008_001	796	819	640	968	749	999	796	1004		976	837	982	706	880	732	898	1176	844	736	946	820		899		858	1001	810	902	817	904	845	825	1114	955	572	767	503		756	667
IMPC_HEM_002	Hematology	IMPC_HEM_019_001___1 point	Mean platelet volume	IMPC_HEM_019_001	4.8	4.6	4.3	4.3	4.3	4.4	4.2	4.3		4.2	4.4	4.1	4.4	4.3	4.2	4.3	4.3	4.3	4.3	4.3	4.4		4.3		4.8	4.7	5	5.1	4.5	4.5	4.4	4.1	4.6	4.8	4.1	4.5	4.6		4.2	4.6
IMPC_HEM_002	Hematology	IMPC_HEM_027_001___1 point	Red blood cell distribution width	IMPC_HEM_027_001	17.6	17.7	18.1	18.3	17.4	17.6	18.5	18.4		19.3	17.6	19	17.8	18.1	18.4	18.1	18.5	18.2	18.1	17.2	17.9		16.8		17.4	19.5	19.3	19.4	17.1	16.9	17.1	16.4	18	17.6	18.1	17.4	17.4		17.3	17.4
IMPC_HEM_002	Hematology	IMPC_HEM_029_001___1 point	Neutrophil differential count	IMPC_HEM_029_001	15.72	12.45	17.04	16.01	13.89	15.39	14.47	17.8		21.84	11.92	15.84	12.42	12.31	13.38	16.83	12.41	11.28	13.38	10.17	12.72		12.58		21.37	15.77	15.3	14.57	13.63	16.4	13.83	32.82	52.05	15.96	13.9	12.07	11.18		14.63	17.87
IMPC_HEM_002	Hematology	IMPC_HEM_030_001___1 point	Neutrophil cell count	IMPC_HEM_030_001	2.59	1.78	2	1.93	1.31	1.96	0.72	2.65		1.76	1.48	1.94	1.24	0.92	0.9	1.65	1.33	1.1	1.31	1.17	1.28		1.13		2.53	2.57	1.87	1.78	1.18	1.86	1.33	3.21	4.06	0.53	1.76	1.55	1.42		1.77	2.03
IMPC_HEM_002	Hematology	IMPC_HEM_031_001___1 point	Lymphocyte differential count	IMPC_HEM_031_001	77.91	83.5	77.68	80.72	83.1	81.1	83.72	79.87		74.69	85.43	80.78	85.76	84.38	84.17	79.97	86.41	86.79	83.99	87.91	85		85.12		72.38	81.04	77	79.13	83.49	81.57	84.3	64.11	46.67	80.72	83.89	85.83	83.78		81.24	76.41
IMPC_HEM_002	Hematology	IMPC_HEM_032_001___1 point	Lymphocyte cell count	IMPC_HEM_032_001	12.84	11.94	9.12	9.72	7.83	10.32	4.17	11.88		6.02	10.61	9.87	8.58	6.29	5.67	7.85	9.23	8.47	8.21	10.11	8.57		7.66		8.57	13.21	9.41	9.67	7.23	9.25	8.11	6.27	3.64	2.68	10.62	11.02	10.64		9.83	8.68
IMPC_HEM_002	Hematology	IMPC_HEM_033_001___1 point	Monocyte differential count	IMPC_HEM_033_001	2.97	3.71	3.66	3.18	2.97	3.41	1.71	2.28		3.35	2.58	3.37	1.8	3.21	2.41	3.06	1.04	1.89	2.63	1.91	2.25		2.26		4.81	2.64	5.73	4.42	2.54	1.94	1.87	2.97	1.15	3.01	2.13	2.02	4.96		3.14	3.17
IMPC_HEM_002	Hematology	IMPC_HEM_034_001___1 point	Monocyte cell count	IMPC_HEM_034_001	0.49	0.53	0.43	0.38	0.28	0.43	0.09	0.34		0.27	0.32	0.41	0.18	0.24	0.16	0.3	0.11	0.18	0.26	0.22	0.23		0.2		0.57	0.43	0.7	0.54	0.22	0.22	0.18	0.29	0.09	0.1	0.27	0.26	0.63		0.38	0.36
IMPC_HEM_002	Hematology	IMPC_HEM_035_001___1 point	Eosinophil differential count	IMPC_HEM_035_001	2.12	0.35	1.19	0.07	0.03	0.09	0.1	0.02		0.12	0.04	0	0.01	0.08	0.04	0.05	0.14	0.04	0	0.01	0.03		0.02		0.93	0.37	1.39	1.55	0.23	0	0.1	0	0.13	0.3	0	0	0		0.74	1.85
IMPC_HEM_002	Hematology	IMPC_HEM_036_001___1 point	Eosinophil cell count	IMPC_HEM_036_001	0.35	0.05	0.14	0.01	0	0.01	0	0		0.01	0	0	0	0.01	0	0	0.01	0	0	0	0		0		0.11	0.06	0.17	0.19	0.02	0	0.01	0	0.01	0.01	0	0	0		0.09	0.21
IMPC_HEM_002	Hematology	IMPC_HEM_037_001___1 point	Basophil cell count	IMPC_HEM_037_001	0.21	0	0.05	0	0	0	0	0		0	0	0	0	0	0	0.01	0	0	0	0	0		0		0.07	0.03	0.06	0.05	0.01	0	0	0	0	0	0	0	0		0.03	0.08
IMPC_HEM_002	Hematology	IMPC_HEM_038_001___1 point	Basophil differential count	IMPC_HEM_038_001	1.27	0	0.43	0.01	0	0	0	0.03		0	0.03	0.01	0	0.02	0	0.08	0.02	0	0	0	0		0.02		0.59	0.18	0.49	0.41	0.12	0	0	0	0	0	0	0	0		0.25	0.7
IMPC_HWT_001	Heart Weight	IMPC_HWT_007_001___1 point	Body weight	IMPC_HWT_007_001	26.3	23	23	30.1	23.2	28.1	22.4	31.6	25.1	30.7	27.6	29.9	26.2	29.5	25	31.9	30.4	22.5	26.4	30.2	27.4	33.9	29.4	28.6	30	28.4	22.4	22.6	22.5	32.6	21.7	29.5	29	22.8	26.9	22.9	23.6	27.8	25.6	22.2	32	33.5	22.6	21.3	20.2
IMPC_HWT_001	Heart Weight	IMPC_HWT_008_001___1 point	Heart weight	IMPC_HWT_008_001	126	110	121	160	124	158	127	171	131	136	125	166	132	168	167	190	193	127	147	134	130	165	133	174	184	180	138	118	134	175	123	214	256	117	163	118	118	121	126	130	153	192	114	109	110
IMPC_HWT_001	Heart Weight	IMPC_HWT_012_001___1 point	Heart weight normalised against body weight	IMPC_HWT_012_001	4.79087	4.78261	5.26087	5.31561	5.34483	5.62278	5.66964	5.41139	5.21912	4.42997	4.52899	5.55184	5.03817	5.69492	6.68	5.95611	6.34868	5.64444	5.56818	4.43709	4.74453	4.86726	4.52381	6.08392	6.13333	6.33803	6.16071	5.22124	5.95556	5.3681	5.6682	7.25424	8.82759	5.13158	6.05948	5.15284	5	4.35252	4.92188	5.85586	4.78125	5.73134	5.04425	5.11737	5.44554
IMPC_HWT_001	Heart Weight	IMPC_HWT_999_999___1 point	Heart weight normalised against tibia length	IMPC_HWT_999_999			6.52643	8.45219	6.64167	8.20779				7.16166	6.65247	8.75066	6.99153	8.78661	8.72974	9.93204	10.1847	6.74456	7.68427	7.07871	6.77436	8.56698	6.97065	9.28991	9.68421	9.47368	7.26316	6.21053	7.05263	8.75	6.47368	11.3287	13.4808	6.44273	8.67483	6.33047	6.23349	6.47752	6.83668	7.08447	7.98956	10.0052	6.20577	5.93036
IMPC_IPG_001	Intraperitoneal glucose tolerance test (IPGTT)	IMPC_IPG_001_001___1 point	Body Weight	IMPC_IPG_001_001	22.5		20	25.4	19.2	23.7	20.4			25.4		25	22.3	27.3	21.5	27.1	27.1	20	21.6	26.4	24	26.3	25.9	24.5	28.6	26.1	19.7	19.6		27.7	19.1	25.4	26.6	19.2	23.2	19.5	20.5	25.3	23.3	17.8	28.6	29.3	19.1	18.3	17.6
IMPC_IPG_001	Intraperitoneal glucose tolerance test (IPGTT)	IMPC_IPG_002_001___0	Blood glucose concentration	IMPC_IPG_002_001-0	81.08		97.3	106.31	77.48	91.89	88.29			118.92		75.68	77.48	86.49	68.47	102.7	70.27	86.49	88.29	93.69	75.68	79.3	102.7	93.7	82.88	77.48	73.87	86.49		95.5	73.87	84.69	66.67	79.28	93.69	77.48	82.88	100.9	109.91	66.67	126.13	129.73	91.89	84.69	102.7
IMPC_IPG_001	Intraperitoneal glucose tolerance test (IPGTT)	IMPC_IPG_002_001___120	Blood glucose concentration	IMPC_IPG_002_001-120	106.31		90.09	113.51	73.87	120.72	95.5			127.93		109.91	86.49	133.33	82.88	108.11	108.11	72.07	120.72	144.14	84.68	131.5	113.5	126.1	194.6	108.11	82.88	82.88		120.72	79.28	104.51	97.3	81.08	109.91	88.29	91.89	104.51	111.71	72.07	149.55	156.76	88.29	73.87	75.68
IMPC_IPG_001	Intraperitoneal glucose tolerance test (IPGTT)	IMPC_IPG_002_001___15	Blood glucose concentration	IMPC_IPG_002_001-15	302.71		304.51	300.9	257.66	360.36	311.71			385.59		306.31	326.13	309.91	347.75	353.16	304.5	286.49	403.6	390.99	338.74	333.3	356.8	367.6	282.89	360.36	309.91	282.89		291.89	338.74	329.73	288.29	263.07	344.15	293.7	331.53	372.98	338.74	297.3	374.78	376.58	317.12	295.5	331.53
IMPC_IPG_001	Intraperitoneal glucose tolerance test (IPGTT)	IMPC_IPG_002_001___30	Blood glucose concentration	IMPC_IPG_002_001-30	263.07		248.65	239.64	196.4	302.71	264.87			342.35		300.9	311.71	295.5	281.08	374.78	263.06	207.21	223.42	353.15	277.48	345.9	309.9	378.4	351.35	349.55	248.65	209.01		259.46	264.87	356.76	255.86	210.81	288.29	232.43	245.05	300.9	324.33	223.43	320.72	304.51	246.85	201.8	218.02
IMPC_IPG_001	Intraperitoneal glucose tolerance test (IPGTT)	IMPC_IPG_002_001___60	Blood glucose concentration	IMPC_IPG_002_001-60	178.38		167.57	162.16	129.73	210.81	171.17			216.22		221.62	176.58	230.63	192.79	237.84	190.99	120.72	151.35	275.68	183.78	237.8	221.6	255.9	282.89	183.79	124.33	135.14		214.42	147.75	266.67	187.39	142.34	180.18	127.93	174.78	178.38	209.01	131.53	250.45	246.85	160.36	140.54	156.76
IMPC_IPG_001	Intraperitoneal glucose tolerance test (IPGTT)	IMPC_IPG_010_001___1 point	Fasted blood glucose concentration	IMPC_IPG_010_001	81.08		97.3	106.31	77.48	91.89	88.29			118.92		75.68	77.48	86.49	68.47	102.7	70.27	86.49	88.29	93.69	75.68	79.3	102.7	93.7	82.88	77.48	73.87	86.49		95.5	73.87	84.69	66.67	79.28	93.69	77.48	82.88	100.9	109.91	66.67	126.13	129.73	91.89	84.69	102.7
IMPC_IPG_001	Intraperitoneal glucose tolerance test (IPGTT)	IMPC_IPG_011_001___1 point	Initial response to glucose challenge	IMPC_IPG_011_001	221.63		207.21	194.59	180.18	268.47	223.42			266.67		230.63	248.65	223.42	279.28	250.46	234.23	200	315.31	297.3	263.06	254	254.1	273.9	200.01	282.88	236.04	196.4		196.39	264.87	245.04	221.62	183.79	250.46	216.22	248.65	272.08	228.83	230.63	248.65	246.85	225.23	210.81	228.83
IMPC_IPG_001	Intraperitoneal glucose tolerance test (IPGTT)	IMPC_IPG_012_001___1 point	Area under glucose response curve	IMPC_IPG_012_001	12554.6		9459.38	8648.02	7621.35	14986.8	11270.2			13676		16121.1	13729.7	15945.5	14999.6	16122.3	14418.8	6823.95	11580.7	20000.4	13620.9	18507	14148	18785.2	21392.8	16067.6	10014.1	7783.65		12743	11757.5	18580.9	13932.4	8607.98	12514	9324.23	11784.4	12176.1	12770.4	10067.2	14405	13716.6	9838.2	7985.77	7649.25
IMPC_OFD_001	Open Field	IMPC_OFD_001_001___10	Whole arena resting time series	IMPC_OFD_001_001-10	146.58	168.28	129.05	96.36	131.53	130.93	151.23	97.33	69.96	134.4	131.33	118.78	120.9	140.23	110.93	123.83	84.65	135.85	154.78	165.03	152.43	133.1	116.03	133.81	208.61	146.55	114.95	191.65	162.63	97.13	124.78	137.53	176.58	147.73	138.11	157.35	58.43	145.68	98.28	111.95	143.53	153.03	92.03	93.81	107.5
IMPC_OFD_001	Open Field	IMPC_OFD_001_001___15	Whole arena resting time series	IMPC_OFD_001_001-15	140.33	182.33	112.58	166.55	153.48	120.76	208.96	135.88	123.71	164.08	169.48	148.78	108.46	181.2	115.45	157.85	53.71	127.03	190.13	142.76	151.3	114.78	130.28	132.45	226.78	202.18	138.48	193.4	124.18	100.03	150.98	173.3	164.48	148.85	170.46	174.3	109.53	144.05	138.58	162.68	162.3	220.16	141.98	134.61	171.4
IMPC_OFD_001	Open Field	IMPC_OFD_001_001___20	Whole arena resting time series	IMPC_OFD_001_001-20	160.78	201.35	97.66	189.53	136.58	119.13	168.26	164.23	158.11	166.33	217.03	110.73	147.36	148.95	99.88	105.75	127.26	216.96	175.16	194.93	175.83	119.65	147.58	133.7	183.98	190.85	141.33	135.58	162.46	120.11	114.83	176.68	196.58	190.78	145.33	217.76	154.78	105.28	152.08	199.03	184.73	187.16	145.83	129.58	145.5
IMPC_OFD_001	Open Field	IMPC_OFD_001_001___5	Whole arena resting time series	IMPC_OFD_001_001-5	149.61	109.28	171.03	107.18	120.8	125.28	156.35	117.23	102.76	167.95	98.6	122.03	66.21	187.36	104.43	147.23	112.88	117.06	100.11	180.93	139.68	250.93	63.8	151.85	196.83	157.15	97.78	155.88	95.93	65.43	128.75	139.43	99.23	136.45	92.41	127.35	123.28	74.4	74.85	93.68	178.28	207.38	79.25	96.35	76.18
IMPC_OFD_001	Open Field	IMPC_OFD_002_001___10	Whole arena average speed series	IMPC_OFD_002_001-10	12.79	11.23	10.19	12.14	12.71	11.63	12.16	10.99	13.04	9.75	11.41	10.74	13.52	10.92	13.1	10.44	13.15	10.54	12.31	9.42	10.69	10.03	9.94	11.69	10.31	10.62	12.03	10.16	10.37	13.02	12.95	10.64	10.16	8.92	11.26	11.36	12.12	10.39	14.94	12.62	10.39	11.39	11.69	11.23	11.31
IMPC_OFD_001	Open Field	IMPC_OFD_002_001___15	Whole arena average speed series	IMPC_OFD_002_001-15	10.76	8.07	10.1	11.78	10.31	11.8	10.35	11.78	11.01	11.02	10.43	9.79	10.89	9.21	14.15	10.42	11.92	9.91	9.91	8.48	10	11.19	9.82	10.89	7.85	10.85	11.33	8.71	9.57	12.68	10.81	8.75	11.8	8.91	10.78	10.8	10.63	10.47	13.45	11.6	10.94	10.98	10.06	10.38	10.16
IMPC_OFD_001	Open Field	IMPC_OFD_002_001___20	Whole arena average speed series	IMPC_OFD_002_001-20	11.87	9.04	9.8	12.33	10.41	11.16	11.54	11.98	11.35	9.29	10.85	11.65	11.94	9.24	12.57	10.35	12.6	12.54	9.96	8.1	8.61	9.67	11.69	9.99	8.87	7.63	10.87	12.15	10.08	12.68	11.59	8.72	10.35	8.2	10.12	9.9	10.86	12.75	14.43	9.9	9.78	9.92	9.16	9.4	11.83
IMPC_OFD_001	Open Field	IMPC_OFD_002_001___5	Whole arena average speed series	IMPC_OFD_002_001-5	11.49	10.01	11.31	12.81	10.96	13.4	11.01	10.73	11.72	9.77	13.61	10.24	12.91	8.59	14.1	11.13	11.01	10.72	13.97	9.77	10.72	7.6	11.29	9.97	8.2	9.43	12.98	12.27	11.75	14.5	11.39	11.48	11.85	11.31	12.69	9.6	11.57	13.77	12.99	12.21	12.96	8.37	10.83	12.36	11.18
IMPC_OFD_001	Open Field	IMPC_OFD_003_001___10	Periphery distance travelled series	IMPC_OFD_003_001-10	1040.23	906.92	1006.61	1380.05	1458.66	640.14	831.39	956.04	1453.04	1485.02	1030.88	1235.82	1086.63	1212.94	1207.59	1471.35	1453.26	1003.77	1005.63	1060.31	1254.57	1425.42	1280.18	1157.9	531.44	804.03	1222.22	588.91	889.5	918.58	1022.42	1158.07	915.95	1239.67	982.62	1217.45	1704.27	1262.03	989.13	1261.36	1214.58	1251.2	1491.47	1676.09	1375.75
IMPC_OFD_001	Open Field	IMPC_OFD_003_001___15	Periphery distance travelled series	IMPC_OFD_003_001-15	1262.23	776.86	1215.25	948.24	1145.47	1050.67	328.51	871.04	1023.06	1079.77	931.69	971.87	1061.63	953.48	993.7	1004.03	1695.78	1216.01	902.72	1103.2	1114.01	1659.29	1234.42	1252.93	460.67	740.1	939.53	327.91	1003.49	833.99	981.25	719.18	908.73	1157.79	787.81	1106.42	1237.24	1427.96	1204.42	910.91	1261.89	732.21	1272.91	1319.15	900.86
IMPC_OFD_001	Open Field	IMPC_OFD_003_001___20	Periphery distance travelled series	IMPC_OFD_003_001-20	1269.12	811.72	1273.68	795.24	1517.97	1143.44	619.84	974.63	921.12	1118.26	615.06	1357.02	1004.25	1130.62	1194.04	1401.01	1059.29	360.93	838.88	810.33	947.69	1458.45	1125.83	1059.64	654.85	721.39	1193.43	1013.97	739.31	1095.37	1518.1	888.07	688.94	775.86	1054.7	607.31	1183.44	1627.93	1248.83	695.02	830.78	872.27	1147.56	1250.84	1221.45
IMPC_OFD_001	Open Field	IMPC_OFD_003_001___5	Periphery distance travelled series	IMPC_OFD_003_001-5	1316.07	1632.2	1047.68	1619.32	1558.04	1171.07	1011.04	1537.54	1393.73	1180.45	2078.15	1456.8	2033.25	875.68	1390.82	1510.28	1351.24	1668.82	2129.24	1051.04	1599.8	367.95	2265.76	1046.57	650.44	1205.06	2022.81	1225.77	1796.39	1709.39	1292.82	1281.83	1787.5	1679.84	1656.85	1396.46	1780.34	2234.93	1658.2	1719.81	1186.28	724.39	2122.75	1748.66	1910.94
IMPC_OFD_001	Open Field	IMPC_OFD_004_001___10	Periphery resting time series	IMPC_OFD_004_001-10	114.53	146.55	111.15	89.23	131.53	33.63	67.5	49	63.58	134.4	96.03	73.38	65.8	134.63	40.6	121.7	36.3	94.65	150.55	164.93	150.25	133.1	113.48	97.43	189.23	95.45	66.8	103.75	128.4	29.1	82.88	121.25	161.58	147.73	74.68	157.35	48.18	134.68	60.6	88.05	139.45	153.03	89.78	76.58	102.15
IMPC_OFD_001	Open Field	IMPC_OFD_004_001___15	Periphery resting time series	IMPC_OFD_004_001-15	138.8	182.33	75.4	164.7	149.93	64.08	15.78	92.23	86.48	157.43	161.38	131.95	56.48	173.7	39.6	141.15	49.78	98.53	187.88	131.38	149.6	107.4	130.28	123.05	226.78	197.75	70.2	18.9	110.93	27.85	134.05	170.65	142.85	148.85	151.63	174.3	56.93	144.05	102.08	127.88	162.3	210.48	141.98	131.23	148.15
IMPC_OFD_001	Open Field	IMPC_OFD_004_001___20	Periphery resting time series	IMPC_OFD_004_001-20	143.7	201.35	90.58	165.18	134.58	51.08	69.38	164.15	56.53	164.13	213.95	97	75.38	130.9	40.58	101.6	33.88	75.48	170.63	194.93	175.83	117.4	141.38	93.2	181.68	183.05	112.7	53.88	121.88	44.58	106	174.15	105.1	188.68	136.53	217.68	153.88	105.28	125.25	196.6	184.73	183.43	142.8	123.85	145.4
IMPC_OFD_001	Open Field	IMPC_OFD_004_001___5	Periphery resting time series	IMPC_OFD_004_001-5	134.88	106.15	165.1	107.18	120.8	83.33	142.65	113.63	85.83	167.95	89.65	122.03	49.43	184.18	57.88	147.23	104.3	102.13	97.53	180.93	139.68	250.93	63.8	79.05	194.05	157.15	85.23	141.28	89.43	47.85	126.2	137.63	96.98	136.45	77.38	127.35	123.28	74.4	64.75	80.75	178.28	207.38	79.25	83.35	62.25
IMPC_OFD_001	Open Field	IMPC_OFD_005_001___10	Distance travelled	IMPC_OFD_005_001-10	1958.83	1481.77	1743.11	2469.42	2131.46	1970.69	1814.25	2229.49	2998.52	1615.85	1932.97	1947.33	2417.72	1767.65	2468.79	1832.85	2826.37	1729.08	1786.8	1283.22	1597.43	1662.49	1826.47	1941.7	941.04	1629.41	2224.65	1099.34	1422.03	2637.34	2268.82	1729.02	1256.27	1358.92	1825.1	1600.29	2928.5	1603.25	3026.99	2375.39	1621.18	1677.43	2430.95	2327.09	2155.97
IMPC_OFD_001	Open Field	IMPC_OFD_005_001___15	Distance travelled	IMPC_OFD_005_001-15	1718.15	946.6	1877.66	1574.84	1515.14	2105.19	942.72	1934.3	1939.31	1513.76	1361.98	1480.8	2088.8	1094.38	2623.54	1482.8	2947.34	1714.61	1090.37	1331.29	1486.59	2085.34	1662.82	1833.4	586.65	1041.83	1821.28	929.78	1679.4	2545.88	1596.92	1093.76	1600.8	1347.2	1396.4	1373.52	2025.83	1620.9	2169.48	1592.47	1521.89	877.6	1590.37	1716.65	1325.6
IMPC_OFD_001	Open Field	IMPC_OFD_005_001___20	Distance travelled	IMPC_OFD_005_001-20	1655.82	895.54	2001.97	1367.13	1708.5	2028.6	1520.69	1628.56	1615.43	1241.85	900.41	2205.39	1825.24	1396.02	2515.47	2015.39	2179.71	1044.36	1243.97	853.3	1069.17	1744.79	1790.88	1661.4	1028.88	847.5	1734.55	1997.69	1393.05	2282.25	2161.32	1090.84	1070.71	896.08	1566.2	817.93	1576.88	2496.72	2137.73	1000.14	1130.6	1118.96	1412.42	1601.56	1827.19
IMPC_OFD_001	Open Field	IMPC_OFD_005_001___5	Distance travelled	IMPC_OFD_005_001-5	1728.22	1906.16	1454.6	2465.05	1960.24	2334.91	1576.54	1958.13	2312.14	1275.2	2728.87	1820.32	3016.87	950.61	2754.13	1700.06	2053.35	1959.62	2792.07	1149.52	1698.42	373.03	2664.19	1471.01	834.92	1347.38	2625.08	1768.75	2398.77	3395.76	1950.1	1843.04	2376.23	1849.37	2633.07	1658.18	2044.82	3106.54	2913.41	2517.48	1562.54	772.95	2389.09	2502.96	2502.5
IMPC_OFD_001	Open Field	IMPC_OFD_006_001___10	Number of Rears	IMPC_OFD_006_001-10	49	26	64	119	55	70	50	65	84	52	26	75	77	46	69	34	67	39	48	20	36	51	44	39	0	44	18	18	37	56	44	28	49	24	41	51	86	66	78	76	45	2	78	70	50
IMPC_OFD_001	Open Field	IMPC_OFD_006_001___15	Number of Rears	IMPC_OFD_006_001-15	61	26	88	91	60	74	28	58	51	33	31	69	70	37	59	37	112	70	30	17	51	96	42	14	0	23	35	30	42	79	39	22	82	23	55	38	75	75	89	70	46	8	54	38	43
IMPC_OFD_001	Open Field	IMPC_OFD_006_001___20	Number of Rears	IMPC_OFD_006_001-20	64	33	94	56	85	88	71	57	57	25	21	100	77	90	96	66	62	38	37	14	53	80	48	47	0	31	27	76	35	67	64	34	61	17	64	23	56	84	71	63	26	24	61	65	54
IMPC_OFD_001	Open Field	IMPC_OFD_006_001___5	Number of Rears	IMPC_OFD_006_001-5	23	28	43	59	26	52	64	48	47	12	21	45	76	20	25	9	32	39	29	16	24	13	30	5	2	16	19	25	17	66	30	5	33	26	44	31	24	74	41	60	22	8	48	32	47
IMPC_OFD_001	Open Field	IMPC_OFD_007_001___1 point	Whole arena resting time	IMPC_OFD_007_001	597.3	661.24	510.32	559.62	542.39	496.1	684.8	514.67	454.54	632.76	616.44	500.32	442.93	657.74	430.69	534.66	378.5	596.9	620.18	683.65	619.24	618.46	457.69	551.81	816.2	696.73	492.54	676.51	545.2	382.7	519.34	626.94	636.87	623.81	546.31	676.76	446.02	469.41	463.79	567.34	668.84	767.73	459.09	454.35	500.58
IMPC_OFD_001	Open Field	IMPC_OFD_008_001___1 point	Whole arena permanence	IMPC_OFD_008_001	1200	1200	1200	1200	1200	1200	1200	1200	1200	1200	1200	1200	1200	1200	1200	1200	1200	1200	1200	1200	1200	1200	1200	1200	1200	1200	1200	1200	1200	1200	1200	1200	1200	1200	1200	1200	1200	1200	1200	1200	1200	1200	1200	1200	1200
IMPC_OFD_001	Open Field	IMPC_OFD_009_001___1 point	Whole arena average speed	IMPC_OFD_009_001	11.71	9.71	10.26	12.3	11.12	11.99	11.36	11.31	11.89	9.95	11.86	10.65	12.35	9.6	13.47	10.57	12.18	10.69	11.92	8.94	10.07	10.09	10.7	10.66	8.83	9.67	11.88	11.07	10.53	13.29	11.72	10.04	11.19	9.46	11.35	10.41	11.37	12.08	13.92	11.83	10.99	10.29	10.56	10.93	11.17
IMPC_OFD_001	Open Field	IMPC_OFD_010_001___1 point	Periphery distance travelled	IMPC_OFD_010_001	4887.65	4127.7	4543.23	4742.85	5680.13	4005.31	2790.78	4339.26	4790.96	4863.5	4655.78	5021.5	5185.76	4172.72	4786.14	5386.68	5559.57	4249.52	4876.48	4024.89	4916.07	4911.11	5906.2	4517.05	2297.4	3470.58	5377.99	3156.56	4428.68	4557.32	4814.59	4047.14	4301.12	4853.17	4481.98	4327.64	5905.29	6552.86	5100.58	4587.09	4493.54	3580.08	6034.69	5994.74	5408.99
IMPC_OFD_001	Open Field	IMPC_OFD_011_001___1 point	Periphery resting time	IMPC_OFD_011_001	531.91	636.38	442.23	526.29	536.84	232.12	295.31	419.01	292.42	623.91	561.01	424.36	247.09	623.41	178.66	511.68	224.26	370.79	606.59	672.17	615.36	608.83	448.94	392.73	791.74	633.4	334.93	317.81	450.64	149.38	449.13	603.68	506.51	621.71	440.22	676.68	382.27	458.41	352.68	493.28	664.76	754.32	453.81	415.01	457.95
IMPC_OFD_001	Open Field	IMPC_OFD_012_001___1 point	Periphery permanence time	IMPC_OFD_012_001	1022.03	1107.1	937.86	995.365	1100.86	654.17	606.3	893.81	779.295	1143.83	1018.72	961.355	741.11	1088.26	610.91	1078.47	777.86	827.38	1086.48	1149.06	1132.9	1130.16	1069.27	868.045	1095.12	1040.73	844.18	653.64	925.78	586.6	934.225	1084.71	929.925	1156.58	916.805	1132.68	960.885	1063.24	807.58	945.82	1128.85	1142.65	1090.58	1017.59	1010.54
IMPC_OFD_001	Open Field	IMPC_OFD_013_001___1 point	Periphery average speed	IMPC_OFD_013_001	9.97	8.77	9.17	10.11	10.07	9.49	8.97	9.14	9.84	9.35	10.17	9.35	10.5	8.98	11.07	9.5	10.04	9.31	10.16	8.44	9.5	9.42	9.52	9.5	7.57	8.52	10.56	9.4	9.32	10.42	9.93	8.41	10.16	9.07	9.4	9.49	10.21	10.83	11.21	10.14	9.68	9.22	9.48	9.95	9.79
IMPC_OFD_001	Open Field	IMPC_OFD_014_001___1 point	Center distance travelled	IMPC_OFD_014_001	2173.37	1102.37	2534.11	3133.59	1635.22	4434.08	3063.41	3411.23	4074.43	783.15	2268.45	2432.33	4162.86	1035.94	5575.79	1644.42	4447.2	2198.16	2036.73	592.44	935.54	954.53	2038.15	2390.47	1094.09	1395.54	3027.58	2639.01	2464.56	6303.91	3162.56	1709.52	2002.88	598.39	2938.79	1122.27	2670.73	2274.56	5147.03	2898.38	1342.68	866.86	1788.13	2153.52	2402.27
IMPC_OFD_001	Open Field	IMPC_OFD_015_001___1 point	Center resting time	IMPC_OFD_015_001	65.39	24.86	68.09	33.33	5.55	263.98	389.49	95.66	162.12	8.85	55.43	75.96	195.84	34.33	252.03	22.98	154.24	226.11	13.59	11.48	3.88	9.63	8.75	159.08	24.46	63.33	157.61	358.7	94.56	233.32	70.21	23.26	130.36	2.1	106.09	0.08	63.75	11	111.11	74.06	4.08	13.41	5.28	39.34	42.63
IMPC_OFD_001	Open Field	IMPC_OFD_016_001___1 point	Center permanence time	IMPC_OFD_016_001	178.035	92.955	262.21	204.695	99.205	545.91	593.8	306.28	420.785	56.23	181.35	238.715	458.98	111.83	589.15	121.595	422.21	372.7	113.585	51.01	67.165	69.885	130.785	332.005	104.945	159.305	355.86	546.43	274.31	613.5	265.845	115.35	270.145	43.485	283.295	67.365	239.185	136.81	392.5	254.23	71.2	57.41	109.5	182.495	189.515
IMPC_OFD_001	Open Field	IMPC_OFD_017_001___1 point	Center average speed	IMPC_OFD_017_001	19.29	16.19	13.05	18.29	17.46	15.73	14.99	16.2	15.75	16.53	18.02	14.94	15.82	13.37	16.54	16.68	16.6	15	20.37	14.99	14.78	15.84	16.7	13.82	13.59	14.54	15.27	14.06	13.71	16.58	16.17	18.56	14.33	14.46	16.58	16.68	15.22	18.08	18.29	16.09	20	19.7	17.16	15.04	16.35
IMPC_OFD_001	Open Field	IMPC_OFD_018_001___1 point	Latency to center entry	IMPC_OFD_018_001	132.78	16.2	2.33	27.88	20.83	4.83	9.38	58.38	7.45	98.2	26.3	34.75	6.75	95.5	5.93	112.8	84.43	14.15	3.9	152.08	25.6	220.73	33.95	7.35	4.13	163.18	9.83	34.18	6.08	0.03	3.05	11.15	3.65	98.95	1.55	37.93	97.03	21.78	2.78	37.08	8.98	163.08	16.58	1.53	32.48
IMPC_OFD_001	Open Field	IMPC_OFD_019_001___1 point	Number of center entries	IMPC_OFD_019_001	44	26	52	58	42	64	41	52	68	24	49	59	74	28	60	28	75	55	52	20	25	28	44	66	29	20	51	42	47	88	60	43	37	16	57	24	42	55	79	52	35	16	40	37	58
IMPC_OFD_001	Open Field	IMPC_OFD_020_001___1 point	Distance travelled - total	IMPC_OFD_020_001	7061.02	5230.07	7077.34	7876.44	7315.34	8439.39	5854.2	7750.48	8865.4	5646.66	6924.23	7453.84	9348.63	5208.66	10361.9	7031.1	10006.8	6447.67	6913.21	4617.33	5851.61	5865.65	7944.36	6907.51	3391.49	4866.12	8405.56	5795.56	6893.25	10861.2	7977.16	5756.66	6304.01	5451.57	7420.77	5449.92	8576.03	8827.41	10247.6	7485.48	5836.21	4446.94	7822.83	8148.26	7811.26
IMPC_OFD_001	Open Field	IMPC_OFD_021_001___1 point	Number of rears - total	IMPC_OFD_021_001	197	113	289	325	226	284	213	228	239	122	99	289	300	193	249	146	273	186	144	67	164	240	164	105	2	114	99	149	131	268	177	89	225	90	204	143	241	299	279	269	139	42	241	205	194
IMPC_OFD_001	Open Field	IMPC_OFD_022_001___1 point	Percentage center time	IMPC_OFD_022_001	14.8362	7.74625	21.8508	17.0579	8.26708	45.4925	49.4833	25.5233	35.0654	4.68583	15.1125	19.8929	38.2483	9.31917	49.0958	10.1329	35.1842	31.0583	9.46542	4.25083	5.59708	5.82375	10.8987	27.6671	8.74542	13.2754	29.655	45.5358	22.8592	51.125	22.1537	9.6125	22.5121	3.62375	23.6079	5.61375	19.9321	11.4008	32.7083	21.1858	5.93333	4.78417	9.125	15.2079	15.7929
IMPC_OFD_001	Open Field	IMPC_OFD_042_001___10	Periphery permanence time series	IMPC_OFD_042_001-10	219.55	243.825	227.23	227.77	267.38	108.635	149.75	159.595	200.85	289.605	205.975	204.175	167.985	263.48	149.165	279.12	174.4	210.435	254.41	288.58	278.175	286.225	259.255	214.23	253.875	190.62	183.715	179.45	226.89	124.785	180.8	249.3	261.385	292.575	180.93	277.985	217.6	266.06	156.25	207.7	272.115	278.325	248.94	233.505	237.02
IMPC_OFD_001	Open Field	IMPC_OFD_042_001___15	Periphery permanence time series	IMPC_OFD_042_001-15	274.98	288.31	205.24	260.35	269.565	170.96	56.55	195.44	202.895	273.1	267.325	245.795	168.975	280.85	131.36	252.145	221.885	237.8	289.43	273.955	273.925	270.355	276.965	252.105	291.86	278.385	167.005	65.42	231.455	118.035	238.09	273.105	228.035	285.4	245.565	286.945	182.965	284.68	209.21	224.475	286.805	282.185	281.04	274.23	253.705
IMPC_OFD_001	Open Field	IMPC_OFD_042_001___20	Periphery permanence time series	IMPC_OFD_042_001-20	262.42	292.255	236.865	247.745	283.555	180.145	142.8	264.245	148.085	287.1	284.92	236.505	179.225	257.895	152.135	257.105	133.22	114.085	272.57	295.165	289.6	273.645	253.645	210.77	268.66	281.275	237.65	154.51	209.735	150.905	256.04	289.455	178.105	289.61	256.985	287.68	274.58	257.905	231.035	272.9	284.635	284.78	280.425	270.17	270.12
IMPC_OFD_001	Open Field	IMPC_OFD_042_001___5	Periphery permanence time series	IMPC_OFD_042_001-5	265.085	282.705	268.525	259.5	280.355	194.43	257.2	274.53	227.465	294.025	260.5	274.88	224.925	286.035	178.25	290.105	248.355	265.06	270.075	291.36	291.205	299.94	279.4	190.94	280.73	290.455	255.81	254.26	257.7	192.875	259.295	272.85	262.4	288.99	233.325	280.075	285.74	254.595	211.085	240.745	285.295	297.36	280.175	239.68	249.7
IMPC_OFD_001	Open Field	IMPC_OFD_043_001___10	Periphery average speed series	IMPC_OFD_043_001-10	9.91	9.32	8.67	9.96	10.74	8.53	10.11	8.64	10.59	9.57	9.38	9.45	10.63	9.41	11.12	9.35	10.52	8.67	9.68	8.58	9.81	9.31	8.78	9.91	8.22	8.45	10.45	7.78	9.03	9.6	10.44	9.04	9.18	8.56	9.25	10.09	10.06	9.61	10.34	10.54	9.16	9.99	9.37	10.68	10.2
IMPC_OFD_001	Open Field	IMPC_OFD_043_001___15	Periphery average speed series	IMPC_OFD_043_001-15	9.27	7.33	9.36	9.91	9.57	9.83	8.06	8.44	8.79	9.33	8.79	8.54	9.44	8.9	10.83	9.05	9.85	8.73	8.89	7.74	8.96	10.18	8.42	9.71	7.08	9.18	9.71	7.05	8.33	9.25	9.43	7.02	10.67	8.48	8.39	9.82	9.82	10.15	11.24	9.43	10.14	10.21	9.15	9.22	8.53
IMPC_OFD_001	Open Field	IMPC_OFD_043_001___20	Periphery average speed series	IMPC_OFD_043_001-20	10.69	8.93	8.71	9.63	10.19	8.86	8.44	9.74	10.06	9.09	8.67	9.73	9.67	8.9	10.7	9.01	10.66	9.35	8.23	8.08	8.33	9.33	10.03	9.01	7.53	7.34	9.55	10.08	8.42	10.3	10.12	7.7	9.44	7.69	8.76	8.68	9.8	10.67	11.81	9.11	8.32	8.61	8.34	8.55	9.79
IMPC_OFD_001	Open Field	IMPC_OFD_043_001___5	Periphery average speed series	IMPC_OFD_043_001-5	10.11	9.24	10.13	10.63	9.76	10.54	8.83	9.56	9.84	9.36	12.16	9.53	11.59	8.6	11.55	10.57	9.38	10.24	12.34	9.52	10.56	7.51	10.51	9.35	7.5	9.04	11.86	10.85	10.68	11.79	9.71	9.48	10.81	11.01	10.62	9.14	10.96	12.4	11.33	10.75	11.09	8.05	10.56	11.19	10.19
IMPC_OFD_001	Open Field	IMPC_OFD_044_001___10	Center distance travelled series	IMPC_OFD_044_001-10	918.6	574.84	736.49	1089.37	672.8	1330.55	982.86	1273.44	1545.48	130.83	902.09	711.51	1331.09	554.71	1261.2	361.49	1373.11	725.31	781.17	222.92	342.86	237.07	546.28	783.8	409.61	825.38	1002.43	510.43	532.53	1718.76	1246.4	570.95	340.32	119.24	842.48	382.84	1224.23	341.22	2037.86	1114.03	406.6	426.22	939.47	650.99	780.22
IMPC_OFD_001	Open Field	IMPC_OFD_044_001___15	Center distance travelled series	IMPC_OFD_044_001-15	455.92	169.74	662.41	626.6	369.67	1054.53	614.21	1063.26	916.24	433.99	430.29	508.93	1027.16	140.91	1629.85	478.76	1251.56	498.61	187.65	228.09	372.58	426.04	428.39	580.47	125.98	301.73	881.76	601.88	675.91	1711.89	615.67	374.59	692.07	189.41	608.59	267.1	788.58	192.95	965.06	681.56	260	145.39	317.46	397.5	424.74
IMPC_OFD_001	Open Field	IMPC_OFD_044_001___20	Center distance travelled series	IMPC_OFD_044_001-20	386.7	83.82	728.29	571.89	190.54	885.16	900.84	653.93	694.31	123.59	285.34	848.37	820.99	265.4	1321.43	614.38	1120.43	683.43	405.09	42.96	121.49	286.34	665.05	601.76	374.03	126.11	541.13	983.72	653.74	1186.88	643.22	202.78	381.77	120.21	511.5	210.61	393.44	868.79	888.91	305.12	299.82	246.69	264.86	350.72	605.74
IMPC_OFD_001	Open Field	IMPC_OFD_044_001___5	Center distance travelled series	IMPC_OFD_044_001-5	412.15	273.96	406.92	845.73	402.2	1163.84	565.5	420.59	918.41	94.74	650.72	363.52	983.62	74.93	1363.31	189.78	702.11	290.8	662.82	98.48	98.62	5.08	398.43	424.44	184.48	142.32	602.27	542.97	602.38	1686.37	657.27	561.2	588.72	169.53	976.23	261.72	264.48	871.6	1255.2	797.67	376.26	48.56	266.34	754.3	591.56
IMPC_OFD_001	Open Field	IMPC_OFD_045_001___10	Center resting time series	IMPC_OFD_045_001-10	32.05	21.73	17.9	7.13	0	97.3	83.73	48.33	6.38	0	35.3	45.4	55.1	5.6	70.33	2.13	48.35	41.2	4.23	0.1	2.18	0	2.55	36.38	19.38	51.1	48.15	87.9	34.23	68.03	41.9	16.28	15	0	63.43	0	10.25	11	37.68	23.9	4.08	0	2.25	17.23	5.35
IMPC_OFD_001	Open Field	IMPC_OFD_045_001___15	Center resting time series	IMPC_OFD_045_001-15	1.53	0	37.18	1.85	3.55	56.68	193.18	43.65	37.23	6.65	8.1	16.83	51.98	7.5	75.85	16.7	3.93	28.5	2.25	11.38	1.7	7.38	0	9.4	0	4.43	68.28	174.5	13.25	72.18	16.93	2.65	21.63	0	18.83	0	52.6	0	36.5	34.8	0	9.68	0	3.38	23.25
IMPC_OFD_001	Open Field	IMPC_OFD_045_001___20	Center resting time series	IMPC_OFD_045_001-20	17.08	0	7.08	24.35	2	68.05	98.88	0.08	101.58	2.2	3.08	13.73	71.98	18.05	59.3	4.15	93.38	141.48	4.53	0	0	2.25	6.2	40.5	2.3	7.8	28.63	81.7	40.58	75.53	8.83	2.53	91.48	2.1	8.8	0.08	0.9	0	26.83	2.43	0	3.73	3.03	5.73	0.1
IMPC_OFD_001	Open Field	IMPC_OFD_045_001___5	Center resting time series	IMPC_OFD_045_001-5	14.73	3.13	5.93	0	0	41.95	13.7	3.6	16.93	0	8.95	0	16.78	3.18	46.55	0	8.58	14.93	2.58	0	0	0	0	72.8	2.78	0	12.55	14.6	6.5	17.58	2.55	1.8	2.25	0	15.03	0	0	0	10.1	12.93	0	0	0	13	13.93
IMPC_OFD_001	Open Field	IMPC_OFD_046_001___10	Center permanence time series	IMPC_OFD_046_001-10	80.17	56.445	72.86	72	31.88	191.675	150.7	140.655	98.97	10.475	94.815	95.995	131.705	38.57	150.195	20.33	125.12	89.485	45.53	12.72	23.695	12.605	40.555	85.66	46.025	109.34	116.195	120.4	72.85	174.885	119.22	50.71	38.835	7.495	119.25	20.205	82.42	33.96	144.68	92.44	27.405	21.945	51.11	67.605	61.1
IMPC_OFD_001	Open Field	IMPC_OFD_046_001___15	Center permanence time series	IMPC_OFD_046_001-15	25.08	11.25	93.28	39.88	30.855	128.26	243.48	104.58	96.895	28.37	32.795	54.225	131.275	19.12	169.5	48.045	79.065	62.3	10.73	25.885	26.085	30.805	22.575	48.675	9.7	19.805	132.255	234.77	68.275	182.765	60.6	25.185	72.105	14.62	54.485	14.545	117.055	14.23	90.63	75.515	14.625	17.885	19.03	25.79	48.225
IMPC_OFD_001	Open Field	IMPC_OFD_046_001___20	Center permanence time series	IMPC_OFD_046_001-20	37.88	8.205	64.985	52.675	17.115	120.825	157.22	35.925	152.365	12.92	15.1	63.505	120.955	42.175	147.885	43.375	167.07	186.135	27.45	5.125	10.42	26.395	47.175	89.25	31.36	20.605	63.23	145.51	90.865	149.125	45.3	12.285	121.915	10.4	43.035	12.69	25.43	43.205	69.165	27.18	15.655	15.23	19.665	29.85	29.89
IMPC_OFD_001	Open Field	IMPC_OFD_046_001___5	Center permanence time series	IMPC_OFD_046_001-5	34.905	17.055	31.085	40.14	19.355	105.15	42.4	25.12	72.555	4.465	38.64	24.99	75.045	11.965	121.57	9.845	50.955	34.78	29.875	7.28	6.965	0.08	20.48	108.42	17.86	9.555	44.18	45.75	42.32	106.725	40.725	27.17	37.29	10.97	66.525	19.925	14.28	45.415	88.025	59.095	13.515	2.35	19.695	59.25	50.3
IMPC_OFD_001	Open Field	IMPC_OFD_047_001___10	Center average speed series	IMPC_OFD_047_001-10	19.09	16.56	13.4	16.79	21.1	14.1	14.68	13.79	16.69	12.49	15.16	14.06	17.38	16.82	15.79	19.86	17.89	15.02	18.91	17.66	15.94	18.81	14.37	15.91	15.37	14.17	14.73	15.71	13.79	16.08	16.12	16.58	14.28	15.91	15.09	18.95	16.96	14.86	19.05	16.25	17.43	19.42	19.23	12.92	13.99
IMPC_OFD_001	Open Field	IMPC_OFD_047_001___15	Center average speed series	IMPC_OFD_047_001-15	19.36	15.09	11.81	16.48	13.54	14.73	12.21	17.45	15.36	19.98	17.42	13.61	12.95	12.13	17.4	15.27	16.66	14.75	22.13	15.72	15.28	18.19	18.98	14.78	12.99	19.62	13.78	9.99	12.28	15.48	14.1	16.62	13.71	12.96	17.07	18.36	12.23	13.56	17.83	16.74	17.78	17.72	16.68	17.74	17.01
IMPC_OFD_001	Open Field	IMPC_OFD_047_001___20	Center average speed series	IMPC_OFD_047_001-20	18.59	10.22	12.58	20.19	12.61	16.77	15.44	18.24	13.67	11.53	23.74	17.04	16.76	11	14.92	15.66	15.2	15.3	17.67	8.38	11.66	11.86	16.23	12.34	12.87	9.85	15.64	15.42	13	16.13	17.64	20.79	12.54	14.48	14.94	16.7	16.04	20.11	21	12.33	19.15	21.45	15.92	14.54	20.33
IMPC_OFD_001	Open Field	IMPC_OFD_047_001___5	Center average speed series	IMPC_OFD_047_001-5	20.43	19.67	16.18	21.07	20.78	18.42	19.7	19.54	16.51	21.22	21.92	14.55	16.88	8.53	18.17	19.28	16.57	14.65	24.28	13.53	14.16	63.5	19.45	11.92	12.23	14.89	19.04	17.43	16.82	18.92	17.22	22.12	16.8	15.45	18.96	13.14	18.52	19.19	16.11	17.28	27.84	20.66	13.52	16.31	16.27
IMPC_OFD_001	Open Field	IMPC_OFD_048_001___10	Number of center entries series	IMPC_OFD_048_001-10	17	10	11	22	12	14	9	19	20	6	13	17	24	9	17	8	20	18	12	7	9	6	11	19	10	9	15	7	10	14	20	17	9	2	14	8	14	10	22	16	11	8	18	6	16
IMPC_OFD_001	Open Field	IMPC_OFD_048_001___15	Number of center entries series	IMPC_OFD_048_001-15	7	4	13	10	10	15	6	14	17	12	10	13	13	7	16	5	21	16	8	6	8	12	11	18	5	5	13	7	11	20	9	12	7	5	10	7	12	7	19	15	7	3	8	6	8
IMPC_OFD_001	Open Field	IMPC_OFD_048_001___20	Number of center entries series	IMPC_OFD_048_001-20	10	2	12	11	9	11	11	10	13	3	8	18	15	7	12	11	22	8	11	1	3	9	10	14	6	4	9	18	10	24	13	5	11	4	10	2	8	18	12	6	10	4	6	9	14
IMPC_OFD_001	Open Field	IMPC_OFD_048_001___5	Number of center entries series	IMPC_OFD_048_001-5	10	10	16	15	11	24	15	9	18	3	18	11	22	5	15	4	12	13	21	6	5	1	12	15	8	2	14	10	16	30	18	9	10	5	23	7	8	20	26	15	7	1	8	16	20
IMPC_XRY_001	X-ray	IMPC_XRY_008_001___1 point	Number of ribs right	IMPC_XRY_008_001			13	13	13	13				13	13	13	13	13	13	13	13	13	13	13	13	13	13	13	13	13	13	13	13	13	13	13	13	13	13	13	13	13	13	13	13	13	13	13
IMPC_XRY_001	X-ray	IMPC_XRY_009_001___1 point	Number of ribs left	IMPC_XRY_009_001			13	13	13	13				13	13	13	13	13	13	13	13	13	13	13	13	13	13	13	13	13	13	13	13	13	13	13	13	13	13	13	13	13	13	13	13	13	13	13
IMPC_XRY_001	X-ray	IMPC_XRY_013_001___1 point	Number of cervical vertebrae	IMPC_XRY_013_001			7	7	7	7				7	7	7	7	7	7	7	7	7	7	7	7	7	7	7	7	7	7	7	7	7	7	7	7	7	7	7	7	7	7	7	7	7	7	7
IMPC_XRY_001	X-ray	IMPC_XRY_014_001___1 point	Number of thoracic vertebrae	IMPC_XRY_014_001			13	13	13	13				13	13	13	13	13	13	13	13	13	13	13	13	13	13	13	13	13	13	13	13	13	13	13	13	13	13	13	13	13	13	13	13	13	13	13
IMPC_XRY_001	X-ray	IMPC_XRY_015_001___1 point	Number of lumbar vertebrae	IMPC_XRY_015_001			6	6	6	6				6	6	6	6	6	6	6	6	6	6	6	6	6	6	6	6	6	6	6	6	6	6	6	6	6	6	6	6	6	6	6	6	6	6	6
IMPC_XRY_001	X-ray	IMPC_XRY_016_001___1 point	Number of pelvic vertebrae	IMPC_XRY_016_001			4	4	4	4				4	4	4	4	4	4	4	4	4	4	4	4	4	4	4	4	4	4	4	4	4	4	4	4	4	4	4	4	4	4	4	4	4	4	4
IMPC_XRY_001	X-ray	IMPC_XRY_028_001___1 point	Number of digits	IMPC_XRY_028_001			20	20	20	20				20	20	20	20	20	20	20	20	20	20	20	20	20	20	20	20	20	20	20	20	20	20	20	20	20	20	20	20	20	20	20	20	20	20	20
IMPC_XRY_001	X-ray	IMPC_XRY_033_001___1 point	Tibia length	IMPC_XRY_033_001			18.54	18.93	18.67	19.25				18.99	18.79	18.97	18.88	19.12	19.13	19.13	18.95	18.83	19.13	18.93	19.19	19.26	19.08	18.73	19	19	19	19	19	20	19	18.89	18.99	18.16	18.79	18.64	18.93	18.68	18.43	18.35	19.15	19.19	18.37	18.38
TCP_TFL_001	Tail Flick	TCP_TFL_001_001___1	atency to tail flick	TCP_TFL_001_001-1	9.54	5.94	11.13	8.82	6.06	10.67	8.43			6.33	7.29	14.91	6.73	10.66	7.41	12.15									8.65	9.05	9.93	9.28	5.92	9.44	5.4	13.37	12.71	14.62	8.28	6.42		10.35	8.96	8.15
TCP_TFL_001	Tail Flick	TCP_TFL_001_001___2	atency to tail flick	TCP_TFL_001_001-2	6.37	4.59	10.74	8.29	10.07	4.27	5.14			15.32	9.54	14.33	10.07	9.05	5.92	7.04									13.71	13.75	8.9	9.3	9.1	10.69	11.87	4.81	11.65	6.79	7.07	6.28		6.29	10.31	9.78
TCP_TFL_001	Tail Flick	TCP_TFL_001_001___3	atency to tail flick	TCP_TFL_001_001-3	8.2	5.93	12.16	10.11	9.26	5.77	3.96			8.25	8.38	15.71	10.05	7.89	4.48	18									10.08	14.8	12.71	6.53	7.57	18	15.38	5.07	9.99	8.79	6.9	8.7		6.1	7.54	6.99
[truncated: 175 more columns]
