# Supplementary material for: Sexual Dimorphism of the Mouse Plasma Metabolome Is Associated with Phenotypes of 30 Gene Knockout Lines
Source: Metabolites. 2023 Aug 15;13(8):947. doi: 10.3390/metabo13080947 (PMC10456929; doi:10.3390/metabo13080947)
Supplement: Supplementary file 1 [file metabolites-13-00947-s001.zip › Supplementary Data S2_metabolite data_Zhang et al_KOMP_08-2023.xlsx]

## Sheet: read_me
Sexual Dimorphism of the Mouse Plasma Metabolome Is Associated with Phenotypes of 30 Gene Knockout Lines
Ying Zhang 1,2, Dinesh K. Barupal 3, Sili Fan 1, Bei Gao 4, Chao Zhu 5, Ann M. Flenniken 6,7, Colin McKerlie 6,8, Lauryl M. J. Nutter 6,8, Kevin C. Kent Lloyd 9 and Oliver Fiehn 1,*
1	West Coast Metabolomics Center, University of California Davis, Davis, CA 95616, USA; ofiehn@ucdavis.edu (O.F.) ythzhang@ucdavis.edu (Y.Z.); slfan@ucdavis.edu (S.F.)
2	Department of Chemistry, University of California, Davis, Davis, CA 95616, USA
3	Department of Environmental Medicine and Public Health, Icahn School of Medicine at Mount Sinai, New York, NY 10029, USA; dinesh.barupal@mssm.edu
4	School of Marine Sciences, Nanjing University of Information Science and Technology,Nanjing 210044, China; wintergb2012@gmail.com
5	College of Medicine & Nursing, Dezhou University, Dezhou 253023, China; zhuchao@dzu.edu.cn
6	The Centre for Phenogenomics, Toronto, ON M5T 3H7, Canada; flenniken@lunenfeld.ca (A.M.F.); colin.mckerlie@sickkids.ca (C.M.); lauryl.nutter@sickkids.ca (L.M.J.N.)
7	Lunenfeld-Tanenbaum Research Institute, Mount Sinai Hospital, Toronto, ON M5G 1X5, Canada
8	The Hospital for Sick Children, Toronto, ON M5G 1X8, Canada
9	Department of Surgery, School of Medicine, and Mouse Biology Program, University of California, Davis, Davis, CA 95616, USA; kclloyd@ucdavis.edu
	*Correspondence: ofiehn@ucdavis.edu
Assay	platform for measuring the metabolites
ParentName	Metabolite classes
CompoundName	Metabolite name
Unit	Peak intensity for untargeted assay, concentration for targeted assay
PubChemID	Compound identifier
KEGG	Compound identifier
SMILES	Compound identifier
InChiKey	Compound identifier

## Sheet: 2_metabolite data
SI Data 1b. Cleaned Metabolomics Dataset from All Platforms
								ID	34419	38434	38538	38541	69395	91834	115757	115864	55857	69499	144610	187595	198313	144713	170956	198416	209137	229587	237610	257540	281970	209241	220170	229695	237716	257643	307710	348926	365959	296904	319741	349029	410683	441144	483044	417795	432639	448374	510073	496096	204770
								Order	_001	_002	_003	_004	_005	_006	_007	_008	_009	_010	_011	_012	_013	_014	_015	_016	_017	_018	_019	_020	_021	_022	_023	_024	_025	_026	_027	_028	_029	_030	_031	_032	_033	_034	_035	_036	_037	_038	_039	_040	_041
								Genotype	null	null	null	null	null	null	null	null	null	null	null	null	null	null	null	null	null	null	null	null	null	null	null	null	null	null	null	null	null	null	null	null	null	null	null	null	null	null	null	null	A2m
								Gender	Male	Male	Female	Female	Male	Male	Male	Female	Female	Female	Male	Male	Male	Female	Female	Female	Male	Male	Male	Male	Male	Female	Female	Female	Female	Female	Male	Male	Male	Female	Female	Female	Male	Male	Male	Female	Female	Female	Male	Female	Male
Assay	ParentName	CompoundName	Unit	PubChemID	KEGG	SMILES	InChiKey	label	B6NC_24940_034419	B6NC_26164_038434	B6NC_26168_038538	B6NC_26171_038541	B6NC_31165_069395	B6NC_34678_091834	B6NC_37036_115757	B6NC_37043_115864	B6NC_28747_055857	B6NC_31169_069499	B6NC_42020_144610	B6NC_92334_187595	B6NC_98732_198313	B6NC_42023_144713	B6NC_47919_170956	B6NC_98735_198416	B6NC_100762_209137	B6NC_118075_229587	B6NC_130653_237610	B6NC_135404_257540	B6NC_142809_281970	B6NC_100766_209241	B6NC_103485_220170	B6NC_118083_229695	B6NC_130659_237716	B6NC_135407_257643	B6NC_158249_307710	B6NC_172883_348926	B6NC_180635_365959	B6NC_151396_296904	B6NC_165108_319741	B6NC_172886_349029	B6NC_202852_410683	B6NC_212524_441144	B6NC_219972_483044	B6NC_209085_417795	B6NC_211702_432639	B6NC_214377_448374	B6NC_228152_510073	B6NC_223417_496096	ABDJ_70_204770
gctof	Pentoses	xylulose NIST	Peak height	439205	C00312	C1[C@@H]([C@H](C(O1)(CO)O)O)O	LQXVFWRQNMEDEE-PYHARJCCSA-N	ONLI_0001	3210	1187	3206	4480	868	1689	2413	1395	1118	786	3088	939	1948	935	1240	949	3803	770	1136	934	991	933	468	3525	3481	4372	6029	836	6365	2194	3170	2643	831	3897	3019	1985	3989	3649	3499	2919	3385
gctof	Pentoses	xylose	Peak height	135191	C00181	C1[C@H]([C@@H]([C@H](C(O1)O)O)O)O	SRBFZHDQGSBBOR-IOVATXLUSA-N	ONLI_0002	6680	6581	6058	23587	7189	5725	14452	14565	3737	8276	3459	7250	2226	4362	5624	25844	11420	4921	55938	6315	4483	39331	9356	6210	5372	5916	31519	5677	8554	3073	7468	10895	2478	3635	1453	4221	15443	3185	3224	2628	4351
gctof	Sugar alcohols	xylitol	Peak height	6912	C00379	C([C@H](C([C@H](CO)O)O)O)O	HEBKCHPVOIAQTA-NGQZWQHPSA-N	ONLI_0003	1674	2385	1556	1706	2199	1710	1928	1783	1588	2010	1634	2006	1423	1597	1759	1923	1481	1765	2035	2586	1796	1727	1507	1232	1274	1045	2065	2099	1760	866	1488	1187	1583	1521	1454	1597	1353	1927	1916	1646	1978
gctof	Pyrimidine nucleosides	uridine	Peak height	6029	C00299	C1=CN(C(=O)NC1=O)[C@H]2[C@@H]([C@@H]([C@H](O2)CO)O)O	DRTQHJPVMGBUCF-XVFCMESISA-N	ONLI_0005	1978	588	1453	2625	1611	1345	1919	1494	1520	979	973	2026	2503	986	816	2181	2498	2113	1086	1445	1453	1366	1206	1034	599	540	826	1402	1273	1671	2409	432	510	3203	3159	1557	933	1022	1459	4518	3073
gctof	Xanthines	uric acid	Peak height	1175	C00366	C12=C(NC(=O)N1)NC(=O)NC2=O	LEHOTFFKMJEONL-UHFFFAOYSA-N	ONLI_0006	158	3742	16698	3330	5761	2572	5381	158	1739	5850	4000	158	158	8225	1648	3523	1200	3044	158	14704	158	552	817	5892	158	7673	1326	158	1146	158	2259	571	158	158	158	6484	158	158	158	158	1476
gctof	Ureas	urea	Peak height	1176	C00086	C(=O)(N)N	XSQUKJJJFZCRTK-UHFFFAOYSA-N	ONLI_0007	499288	627902	527808	454382	571636	509286	766994	506927	906891	815910	494959	605732	758942	613885	635613	883799	506848	510195	722338	651263	529609	628960	523568	385813	539383	566236	509626	844363	582538	601712	640418	785959	530480	722140	662116	348100	622229	751340	791277	496946	514062
gctof	Pyrimidones	uracil	Peak height	1174	C00106	C1=CNC(=O)NC1=O	ISAKRJDGNUQOIC-UHFFFAOYSA-N	ONLI_0008	2878	2110	3740	2587	3500	2579	5087	2403	1223	1472	2045	842	999	1492	2633	2848	1430	2861	886	1733	1185	2524	1116	1767	966	1521	2155	1568	1297	1334	1532	1040	1171	736	1089	1186	1209	1204	804	1670	1124
gctof	Tyrosine and derivatives	tyrosine	Peak height	6057	C00082	C1=CC(=CC=C1C[C@@H](C(=O)O)N)O	OUYCCCASQSFEME-QMMMGPOBSA-N	ONLI_0009	150539	218957	196544	206810	191751	210818	176129	174128	217324	203397	107036	108248	149451	140698	120934	310365	227026	170669	167635	197800	172134	178302	211144	222683	136534	221490	262716	116747	184722	153825	229374	298039	163056	113306	111614	149082	145839	209993	209105	155160	182081
gctof	Proline and derivatives	trans-4-hydroxyproline	Peak height	5810	C01157	C1[C@H](CN[C@@H]1C(=O)O)O	PMMYEEVYMWASQN-DMTCNVIQSA-N	ONLI_0011	12571	4673	14625	2345	14108	8969	10702	15576	15123	15274	6955	19328	9335	18164	15627	17421	16056	14045	16428	14790	10672	19669	20637	13639	12922	21540	22565	15206	15926	14806	10262	16815	12658	12326	14794	12829	17119	15231	6236	13264	15398
gctof	Hydroxypyrimidines	thymine	Peak height	1135	C00178	CC1=CNC(=O)NC1=O	RWQNBRDOKXIBIV-UHFFFAOYSA-N	ONLI_0012	869	657	1164	951	925	812	1280	936	559	519	708	618	552	938	1101	771	817	896	535	631	719	1253	1403	1034	758	1172	829	700	720	583	976	732	690	510	641	1176	993	666	448	728	732
gctof	L-alpha-amino acids	threonine	Peak height	6288	C00188	C[C@H]([C@@H](C(=O)O)N)O	AYFVYJQAPQTCCC-GBXIJSLDSA-N	ONLI_0014	50452	71735	90207	83189	67516	99132	73976	58019	122051	51232	57490	49920	53921	60217	72875	98443	93055	81654	67331	58376	58753	86813	118235	86124	58271	99689	86850	53140	77329	58717	88896	112370	76524	46152	42869	93848	75003	97190	81623	42026	78391
gctof	Oligopeptides	threonic acid	Peak height	497572	C01620	CC(=O)N[C@@H](CCC(=O)O)C(=O)N[C@@H](CCC(=O)O)C(=O)N[C@@H](CS)C(=O)O	LYEIRXNHQIDPMW-GUBZILKMSA-N	ONLI_0015	20004	15197	21341	13586	18720	17284	21910	16713	13999	10291	15581	9836	11268	13839	13101	21041	15684	21995	12689	11136	11580	14685	14212	10391	7889	17806	21151	11699	16463	14619	14719	11221	10551	10311	11990	12135	10433	8180	9460	14119	12937
gctof	Non-metal sulfates	sulfuric acid	Peak height	1118	C00059	OS(=O)(=O)O	QAOWNCQODCNURD-UHFFFAOYSA-N	ONLI_0017	8604	4730	757	8480	2422	13320	13065	4268	2029	2989	5058	1201	1261	6960	13635	15654	7456	3992	6828	9239	21668	12465	20750	1872	5639	11850	4486	5596	8559	2479	4918	8647	7937	7814	3487	10102	8814	7753	7475	34192	18996
gctof	O-glycosyl compounds	sucrose	Peak height	5988	C00089	C([C@@H]1[C@H]([C@@H]([C@H]([C@H](O1)O[C@]2([C@H]([C@@H]([C@H](O2)CO)O)O)CO)O)O)O)O	CZMRCDWAGMRECN-UGDNZRGBSA-N	ONLI_0018	2409	225	593	232	647	883	127	276	327	372	600	422	200	215	505	1091	430	492	1029	1582	1077	484	600	403	516	403	378	186	282	351	791	518	558	117	560	417	137	89	180	432	391
gctof	Dicarboxylic acids and derivatives	succinic acid	Peak height	1110	C00042	C(CC(=O)O)C(=O)O	KDYFGRWQOYBRFD-UHFFFAOYSA-N	ONLI_0019	7758	6541	8463	8969	8264	9514	11828	510	7182	6984	7486	7864	7089	6702	6654	15236	10387	13263	6648	5468	9079	6831	5702	4404	3171	2586	8844	7754	7090	7378	10007	6155	5446	6854	7468	7952	4747	3116	3654	6326	9452
gctof	Long-chain fatty acids	stearic acid	Peak height	5281	C01530	CCCCCCCCCCCCCCCCCC(=O)O	QIQXTHQIDYTFRH-UHFFFAOYSA-N	ONLI_0020	369952	431802	396331	370769	397753	323042	332860	272331	356830	394089	359638	407240	353832	357080	308671	313921	422685	379020	391071	334013	342981	310030	340535	396523	425261	420558	448871	541573	350945	375827	414548	385082	343735	435942	346185	408772	298564	417053	430359	434595	360821
gctof	Glucuronic acid derivatives	saccharic acid	Peak height	33037	C00818	[C@H]([C@@H]([C@@H](C(=O)O)O)O)([C@H](C(=O)O)O)O	DSLZVSRJTYRBFB-LLEIAEIESA-N	ONLI_0022	1017	840	961	1542	1734	1029	1703	744	898	739	872	1082	584	648	968	1432	795	2088	819	896	920	740	857	1052	687	1051	2011	712	1477	661	832	964	828	608	697	767	493	495	829	770	1069
gctof	Pentoses	ribose	Peak height	5779	C00121	C([C@@H]1[C@H]([C@H](C(O1)O)O)O)O	HMFHBZSHGGEWLO-SOOFDHNKSA-N	ONLI_0023	21581	18402	12701	29575	40496	30996	69840	33532	20951	5278	21260	4466	2045	6772	16975	29436	3997	7477	5957	3451	5013	4011	9405	5382	13257	4004	5890	3685	4598	4001	2733	2222	3405	2642	1855	5988	1201	2422	1483	5989	8721
gctof	Sugar acids and derivatives	ribonic acid	Peak height	5460677	C01685	C([C@H]([C@H]([C@H](C(=O)O)O)O)O)O	QXKAIJAYHKCRRA-BXXZVTAOSA-N	ONLI_0024	445	700	859	1086	978	706	750	555	797	606	680	703	677	721	973	1124	842	1111	861	500	516	1466	1051	734	710	849	1142	763	783	707	845	587	623	581	705	589	747	379	867	990	954
gctof	Sugar alcohols	ribitol	Peak height	94154	C01904	C([C@H](C([C@@H](CO)O)O)O)O	HEBKCHPVOIAQTA-QWWZWVQMSA-N	ONLI_0025	901	1058	723	1139	1124	1060	1023	697	956	958	701	839	604	912	1208	1235	892	1185	1144	909	727	491	510	928	872	945	1141	921	858	895	965	1042	729	877	806	901	806	718	806	781	1014
gctof	Oligosaccharides	raffinose	Peak height	10542	C00492	C([C@@H]1[C@@H]([C@@H]([C@H](C(O1)OC[C@@H]2[C@H]([C@@H]([C@H](C(O2)O[C@]3([C@H]([C@@H]([C@H](O3)CO)O)O)CO)O)O)O)O)O)O)O	MUPFEKGTMRGPLJ-BQCSWRFHSA-N	ONLI_0026	177	407	334	383	916	773	154	188	1060	594	79	1116	1119	230	834	1706	684	476	860	537	192	1253	905	365	457	32	1635	657	989	801	1450	32	926	834	424	883	496	813	731	292	1462
gctof	Alpha-keto acids and derivatives	pyruvic acid	Peak height	1060	C00022	CC(=O)C(=O)O	LCTONWCANYUPML-UHFFFAOYSA-N	ONLI_0027	4928	10611	2008	4419	20774	18523	11135	4860	8082	6928	12806	6732	2796	5775	9127	13981	2992	5237	7366	3194	12573	4896	3794	4653	4276	2676	4970	4834	4949	5655	3603	3190	4727	3597	3312	2579	2395	8520	566	1060	3970
gctof	Nucleoside and nucleotide analogues	pseudo uridine	Peak height	15047	C02067	C1=C(C(=O)NC(=O)N1)[C@H]2[C@@H]([C@@H]([C@H](O2)CO)O)O	PTJWIQPHWPFNBW-GBNDHIKLSA-N	ONLI_0028	4552	3403	5129	5639	4975	3131	6083	4895	3868	2521	3923	610	2396	4276	4727	4498	3659	5885	2898	3160	3243	5670	3723	4254	1992	3274	5124	3200	4188	3357	3596	3141	3910	3070	2945	4419	4113	2866	2941	4062	2460
gctof	Cyclohexanols	pinitol	Peak height	164619	C03844	COC1[C@@H]([C@H](C([C@@H]([C@@H]1O)O)O)O)O	DSCFFEYYQKSRSV-FEPQRWDDSA-N	ONLI_0030	731	1865	1301	2168	2290	1722	1109	1133	2606	1200	755	2076	1451	1188	1689	3546	1653	1685	1771	1280	1791	2519	2420	1688	1561	1111	2891	1472	1972	1893	2689	1913	1548	1174	683	1264	800	1416	1349	1398	1198
gctof	Medium-chain fatty acids	pimelic acid	Peak height	385	C02656	C(CCC(=O)O)CCC(=O)O	WLJVNTCWHIRURA-UHFFFAOYSA-N	ONLI_0031	1276	1621	1355	1588	1801	2018	1212	2589	1133	975	2036	1519	1275	1688	2760	2117	1500	2148	1389	1133	1347	1309	1111	1549	970	1610	2067	969	1412	1379	1069	1296	1118	892	1425	1527	1040	1412	865	425	2337
gctof	Non-metal phosphates	phosphate	Peak height	1004	C00009	OP(=O)(O)O	NBIIXXVUZAFLBC-UHFFFAOYSA-N	ONLI_0032	21151	5020	15678	18236	8121	2705	6007	14172	12808	9147	6534	18893	9356	954	2507	13112	7558	11487	9137	15370	5209	7019	3992	14617	11329	11008	5524	7719	4948	8191	12359	11202	6426	141	20687	8240	9633	71430	13760	10892	7798
gctof	Phenethylamines	phenylethylamine	Peak height	1001	C05332	C1=CC=C(C=C1)CCN	BHHGXPLMPWCGHP-UHFFFAOYSA-N	ONLI_0033	175	1427	205	302	271	1254	819	741	2488	1316	829	1256	558	642	930	3077	212	290	1282	395	1881	2574	2438	983	1773	1276	2026	813	831	225	365	2526	281	1104	224	133	734	788	1768	1681	751
gctof	Phenylalanine and derivatives	phenylalanine	Peak height	6140	C00079	C1=CC=C(C=C1)C[C@@H](C(=O)O)N	COLNVLDHVKWLRT-QMMMGPOBSA-N	ONLI_0034	40930	51229	43923	51964	48095	64425	51225	43068	56512	44183	36079	37827	43601	46447	48656	72879	53846	46880	49210	59617	46840	64600	56519	40266	37956	53552	56019	38772	51275	44720	47643	62603	52892	51347	27444	45230	48623	53898	57606	47335	54914
gctof	1-hydroxy-4-unsubstituted benzenoids	phenol	Peak height	996	C00146	C1=CC=C(C=C1)O	ISWSIDIOOBJBQZ-UHFFFAOYSA-N	ONLI_0035	24184	26197	9244	14083	22783	12299	28601	16141	22807	23431	29750	28402	13823	9760	26747	27309	19012	22493	22410	7456	24742	12234	5298	27248	15818	13922	19912	7022	20738	18889	14686	14326	7278	6218	15289	15928	18352	21781	10646	30034	16577
gctof	Medium-chain fatty acids	pelargonic acid	Peak height	8158	C01601	CCCCCCCCC(=O)O	FBUKVWPVBMHYJY-UHFFFAOYSA-N	ONLI_0036	24822	19728	31162	28494	24828	41805	35742	24813	29880	24646	32808	36036	15332	34111	28959	27984	31893	14206	30379	21221	34330	18326	32281	12584	19611	14818	39858	17175	35802	33847	23681	17701	16573	11993	18928	18670	33144	31560	25138	22004	18377
gctof	Long-chain fatty acids	palmitic acid	Peak height	985	C00249	CCCCCCCCCCCCCCCC(=O)O	IPCSVZSSVZVIGE-UHFFFAOYSA-N	ONLI_0039	72200	77515	78872	73472	80700	60922	68012	55465	65260	79472	76271	79738	73486	64891	68138	56883	80858	77088	77542	69403	71104	66276	61179	77497	79709	90366	78589	91153	67843	69443	83421	80678	62814	82216	64234	71944	62296	73751	73168	83720	65053
gctof	Alpha amino acids and derivatives	oxoproline	Peak height	7405	C01879	C1CC(=O)N[C@@H]1C(=O)O	ODHCTXKNWHHXJC-VKHMYHEASA-N	ONLI_0040	439966	450908	479939	509491	473012	515700	554614	486396	480865	439857	578491	555471	302128	559022	439316	514892	463845	414253	493177	454211	448230	561138	579527	436572	373736	652603	610178	404691	492144	431282	348277	458771	390896	395639	437249	365943	513197	496740	402437	409880	434985
gctof	Dicarboxylic acids and derivatives	oxalic acid	Peak height	971	C00209	C(=O)(C(=O)O)O	MUBZPKHOEPUJKR-UHFFFAOYSA-N	ONLI_0041	32	32	2972	32	368	7436	681	32	32	32	32	825	32	780	32	32	127	180	447	32	119	32	6519	510	206	105	440	524	32	133	32	288	710	605	32	32	32	32	548	573	32
gctof	L-alpha-amino acids	ornithine	Peak height	6262	C00077	C(C[C@@H](C(=O)O)N)CN	AHLPHDHHMVZTML-BYPYZUCNSA-N	ONLI_0042	81444	145513	99291	139710	118394	114970	111075	80830	150091	107959	54052	7497	120005	87239	75388	210342	133123	102689	98334	114305	70189	134700	129625	123414	66552	158162	121839	73273	139499	95203	104556	133924	78089	62721	47672	81131	78544	94755	134002	95620	124786
gctof	Long-chain fatty alcohols	octadecanol	Peak height	8221	D01924	CCCCCCCCCCCCCCCCCCO	GLDOVTGHNKAZLK-UHFFFAOYSA-N	ONLI_0044	1492	1166	1307	1548	1071	2403	2988	1046	944	1101	1005	2106	746	909	934	857	1688	1282	1046	1056	968	11390	886	1500	1604	1502	1079	913	1052	835	1473	1430	1074	710	732	1705	1036	756	1015	1234	1496
gctof	Long-chain fatty acids	myristic acid	Peak height	11005	C06424	CCCCCCCCCCCCCC(=O)O	TUNFSRHWOTWDNC-UHFFFAOYSA-N	ONLI_0045	4193	3247	4367	4547	4328	3326	3682	2901	3680	4205	3361	4964	3730	3306	3868	2452	4277	4135	4481	3069	2991	3839	3902	3255	3662	3772	4084	4749	3562	3595	3469	3422	3230	4407	3542	4197	3176	4305	4277	4152	4359
gctof	Cyclohexanols	myo-inositol	Peak height	892	C00137	C1(C(C(C(C(C1O)O)O)O)O)O	CDAISMWEOUEBRE-UHFFFAOYSA-N	ONLI_0046	82981	96741	104715	129360	132318	107435	90599	74284	102933	83179	69211	93928	50036	46877	58659	145654	45519	106986	66009	40356	62236	64410	60998	53229	63687	60134	128569	61937	58874	66902	73532	53461	33810	39070	30963	51155	37231	49652	97929	93861	86869
gctof	Alpha amino acids	methionine sulfoxide	Peak height	847	C02989	CS(=O)CCC(C(=O)O)N	QEFRNWWLZKMPFJ-UHFFFAOYSA-N	ONLI_0047	8151	16719	14445	7413	11531	11664	11701	5776	18132	11862	7764	6272	16311	11218	11156	21205	16331	5574	10992	11973	8913	20571	26600	9069	14506	26510	21524	11143	17549	12200	15027	15931	15161	11883	9765	17320	13553	14893	19815	15107	16445
gctof	Methionine and derivatives	methionine	Peak height	6137	C00073	CSCC[C@@H](C(=O)O)N	FFEARJCKVFRZRR-BYPYZUCNSA-N	ONLI_0048	29365	50548	30070	37659	35835	62659	53358	33323	63338	32221	33111	19159	35125	33445	40104	71472	50752	43588	39822	46795	34478	58155	54378	36612	31146	56210	36454	36195	46216	26599	44072	66412	46459	36772	13576	31454	34701	55059	47787	17119	47868
gctof	Hexoses	mannose	Peak height	18950	C00159	C([C@@H]1[C@H]([C@@H]([C@@H](C(O1)O)O)O)O)O	WQZGKKKJIJFFOK-QTVWNMPRSA-N	ONLI_0049	74201	55899	78152	82328	75249	65285	96609	69696	34291	55116	72323	44190	38778	83194	32522	40604	48739	72775	37964	63391	60497	59653	34847	73229	41215	58615	52198	53237	63676	48953	34149	32820	38265	31698	70363	75585	76479	26502	43260	69060	41820
gctof	O-glycosyl compounds	maltose	Peak height	10991489	C00208	C([C@@H]1[C@H]([C@@H]([C@H]([C@H](O1)O[C@@H]2[C@H](O[C@@H]([C@H]([C@H]2O)O)O)CO)O)O)O)O	GUBGYTABKSRVRQ-DKBJLJRDSA-N	ONLI_0050	805	514	718	1240	1266	728	2313	580	665	1058	934	491	1517	708	390	642	670	1674	1663	738	780	687	1187	938	779	524	1488	870	726	488	551	345	898	559	1498	1896	446	561	824	569	417
gctof	Beta hydroxy acids and derivatives	malic acid	Peak height	525	C00711	C(C(C(=O)O)O)C(=O)O	BJEPYKJPYRNKOW-UHFFFAOYSA-N	ONLI_0051	12943	24940	15152	29397	25198	22563	22617	13127	12786	16096	13799	16906	8661	8603	11629	29420	11953	38377	9484	9435	17936	10370	8445	8102	6544	7974	22969	11592	9233	9484	12087	11350	6621	8248	5667	8319	5682	5092	5672	6972	13597
gctof	Glucuronic acid derivatives	lyxose	Peak height	441476	C08348	[C@@H]1([C@H]([C@H](O[C@H]([C@@H]1O)O)C(=O)O)O)O	AEMOLEFTQBMNLQ-DTEWXJGMSA-N	ONLI_0052	1514	2258	892	3564	1651	1859	4728	6116	1305	3632	1469	3042	421	743	2199	8876	1592	1208	4990	2288	1671	3190	3679	2670	2802	2468	2733	1180	951	1223	1066	6567	1482	765	603	2201	1656	576	472	622	1787
gctof	Sugar alcohols	lyxitol	Peak height	439255	C00532	C([C@@H](C([C@H](CO)O)O)O)O	HEBKCHPVOIAQTA-IMJSIDKUSA-N	ONLI_0053	2976	5243	4172	5337	5453	4570	4011	3470	8087	6484	3301	6288	6155	3540	6366	9297	4470	5503	6950	5298	979	5661	6513	4682	4247	5379	7540	6104	6134	5693	4811	6334	5808	3667	3108	3481	3851	3133	5276	995	5450
gctof	L-alpha-amino acids	lysine	Peak height	5962	C00047	C(CCN)C[C@@H](C(=O)O)N	KDXKERNSBIXSRK-YFKPBYRVSA-N	ONLI_0054	36102	133191	122201	156959	114780	112149	120530	92299	164281	105903	55060	16502	93535	126614	105213	160668	135680	123063	73944	84345	48300	205574	186286	160004	87174	203766	159637	52923	125033	93682	135045	152883	86279	62665	56353	53545	100913	114151	100290	87879	52052
gctof	Medium-chain fatty acids	lauric acid	Peak height	3893	C02679	CCCCCCCCCCCC(=O)O	POULHZVOKOAJMA-UHFFFAOYSA-N	ONLI_0057	4129	4324	5365	5910	5774	6427	8146	3901	3553	5190	6430	8304	2098	4982	5053	3846	6699	4290	4909	4614	6618	5271	3123	6956	6561	6366	8131	8056	4633	4499	5124	7493	3226	5759	2591	8566	6360	6053	4857	7306	6744
gctof	Alpha hydroxy acids and derivatives	lactic acid	Peak height	61503	C00256	C[C@H](C(=O)O)O	JVTAAEKCZFNVCJ-UWTATZPHSA-N	ONLI_0058	1718084	2367103	465392	977827	1550438	2141803	2543946	1641247	2344156	2416364	2035650	2136408	1358531	1483116	2382303	2441352	1414129	1564799	2363554	1717515	2914905	1911619	911882	894820	1164259	904687	1388597	1287769	1465719	1785360	576583	1039612	2000867	1520363	1060016	1157035	1479838	1769236	1061754	749268	1439944
gctof	Secondary alcohols	lactamide	Peak height	94220		CC(C(=O)N)O	SXQFCVDSOLSHOQ-UHFFFAOYSA-N	ONLI_0059	1900	4461	997	1374	2130	3340	2753	1532	2147	3683	3670	1051	1793	1667	3388	3720	1551	2050	2950	2033	3763	2705	1664	1690	2074	1962	1508	1584	2019	2149	1570	546	2304	1657	1446	1548	2268	1625	1411	1210	1898
gctof	Sugar acids and derivatives	isothreonic acid	Peak height	151152	C21649	C([C@H]([C@@H](C(=O)O)O)O)O	JPIJQSOTBSSVTP-GBXIJSLDSA-N	ONLI_0060	2259	1850	1780	1670	2377	2299	2328	1383	1583	1418	2131	2838	2019	2454	1889	1668	1962	1899	1617	2388	3130	1193	1662	1348	1946	1592	1242	1924	2490	2059	1820	1789	1712	2855	3440	2007	2181	1525	1960	1649	2048
gctof	Isoleucine and derivatives	isoleucine	Peak height	6306	C00407	CC[C@H](C)[C@@H](C(=O)O)N	AGPKZVBTJJNPAG-WHFBIAKZSA-N	ONLI_0061	183883	209192	233854	207195	204901	252237	241861	174685	194191	216139	170630	130118	173391	171744	208710	300529	240636	194479	176936	186190	176524	214931	254495	191529	170623	246198	236274	111932	154968	179708	257036	298404	160878	138072	133115	175414	191960	197931	182048	214286	207276
gctof	Sugar acids and derivatives	isohexonic acid	Peak height	10690	C00257	C([C@H]([C@H]([C@@H]([C@H](C(=O)O)O)O)O)O)O	RGHNJXZEOKUKBD-SQOUGZDYSA-N	ONLI_0062	999	810	909	1280	1424	985	1609	711	896	738	855	1070	547	826	951	1380	1013	1875	829	900	989	713	856	990	503	991	1849	694	1435	642	802	934	821	612	679	771	487	479	793	733	1028
gctof	Tricarboxylic acids and derivatives	isocitric acid	Peak height	1198	C00311	C(C(C(C(=O)O)O)C(=O)O)C(=O)O	ODBLHEXUDAPZAU-UHFFFAOYSA-N	ONLI_0063	2265	2564	2730	5750	3198	2484	2797	3071	1689	2076	2783	3077	1974	3394	3165	2547	2470	3695	1932	1986	2169	2459	2588	2448	1503	2864	4267	2402	2409	2139	2586	1923	1546	1826	1857	2177	2074	1740	1388	2424	2108
gctof	Purine nucleosides	inosine	Peak height	135398641	C00294	C1=NC2=C(C(=O)N1)N=CN2[C@H]3[C@@H]([C@@H]([C@H](O3)CO)O)O	UGQMRVRMYYASKQ-KQYNXXCUSA-N	ONLI_0064	772	428	53	314	2129	93	4408	100	1749	36	2371	352	123	43	45	25	133	164	280	130	309	84	472	296	6441	5	197	437	274	62	284	41	119	755	227	529	164	54	379	54	2839
gctof	Arylsulfates	indoxyl sulfate	Peak height	10258		C1=CC=C2C(=C1)C(=CN2)OS(=O)(=O)O	BXFFHSIDQOFMLE-UHFFFAOYSA-N	ONLI_0065	965	1933	1030	397	1163	2501	1237	938	4167	3226	1184	988	667	2758	3539	3049	904	1242	1824	803	1341	1506	868	2092	1509	2248	1084	536	1447	805	2080	3295	598	1229	483	1197	1318	1264	849	1383	1108
gctof	Indolyl carboxylic acids and derivatives	indole-3-propionic acid	Peak height	3744		C1=CC=C2C(=C1)C(=CN2)CCC(=O)O	GOLXRNDWAUTYKT-UHFFFAOYSA-N	ONLI_0066	2794	4300	3055	4228	4533	3780	3476	5462	7039	5777	2876	5301	3990	4076	6914	8306	4276	4478	5660	435	3576	8314	4914	1864	5269	1971	7732	5803	3691	6063	7785	7532	2488	2881	2536	5146	2653	3085	3744	2019	7151
gctof	Indolyl carboxylic acids and derivatives	indole-3-lactate	Peak height	92904	C02043	C1=CC=C2C(=C1)C(=CN2)CC(C(=O)O)O	XGILAAMKEQUXLS-UHFFFAOYSA-N	ONLI_0067	2689	3496	3469	4278	3004	2227	1709	1687	4804	4802	2299	3081	2851	2367	6671	7820	3800	3805	3395	3906	3307	5054	4113	4009	4444	4932	5882	2955	3596	4218	3990	4152	2282	1335	2801	4884	2872	3028	3017	3728	4162
gctof	Indole-3-acetic acid derivatives	indole-3-acetate	Peak height	802	C00954	C1=CC=C2C(=C1)C(=CN2)CC(=O)O	SEOVTRFCIGRIMH-UHFFFAOYSA-N	ONLI_0068	3249	3807	5783	6258	1245	1846	1934	6910	4102	5189	1267	5975	3898	4388	3107	5674	2959	3310	3142	2529	4694	5658	3167	6521	7147	5629	3087	4787	2670	6672	6609	7103	2273	3286	5599	6525	4280	5311	3926	4065	2860
gctof	Homogeneous other non-metal compounds	hydroxylamine	Peak height	787	C00192	NO	AVXURJPOCDRRFD-UHFFFAOYSA-N	ONLI_0069	591395	665972	639951	572286	610660	956135	707112	569184	700034	813147	709677	381941	709632	875621	916738	937018	664545	636194	790182	709772	652930	969209	770411	622867	720267	680645	640860	559893	706091	693305	700424	805052	929911	708054	745332	508406	821096	560826	591426	700325	533566
gctof	Organonitrogen compounds	hydroxycarbamate NIST	Peak height	16639161		C(=O)(NO)O	DRAJWRKLRBNJRQ-UHFFFAOYSA-N	ONLI_0070	6438	7652	10579	11943	13634	10138	9677	9713	15389	19530	13038	14553	13762	15339	15399	18126	7258	7877	16947	5437	7929	15576	14083	7339	7731	7745	9143	13324	10224	6189	4534	9550	11949	7489	11129	11770	8275	7879	9328	3707	8209
gctof	Phenylpropanoic acids	hydrocinnamic acid	Peak height	107	C05629	C1=CC=C(C=C1)CCC(=O)O	XMIIGOLPHOKFCH-UHFFFAOYSA-N	ONLI_0071	4666	7129	5789	4377	8613	8943	8278	7488	1594	774	6933	10684	1050	4269	7421	10426	6050	12064	8572	9721	648	1048	9299	1100	7709	8220	13131	6065	10501	8213	6316	8969	5877	6063	2585	7108	5430	8319	11069	1846	6630
gctof	Hippuric acids	hippuric acid	Peak height	464	C01586	C1=CC=C(C=C1)C(=O)NCC(=O)O	QIAFMBKCNZACKA-UHFFFAOYSA-N	ONLI_0072	357	292	243	170	3368	3182	234	281	6968	310	226	912	325	123	534	461	2628	3707	2067	1569	378	479	292	518	472	2839	3254	4179	3412	4246	286	5611	240	4500	323	4501	3979	189	3351	256	1460
gctof	Glucuronic acid derivatives	hexuronic acid	Peak height	84740	C08348	C(=O)[C@@H]([C@H]([C@H]([C@@H](C(=O)O)O)O)O)O	IAJILQKETJEXLJ-RSJOWCBRSA-N	ONLI_0073	4666	8625	4653	8266	14500	4920	11367	7102	5060	5562	9805	2806	2997	5876	5465	9907	3563	11356	5244	5135	3078	2622	6188	5391	2259	4641	9682	5484	5930	4732	4843	4750	2979	4349	3879	4913	627	2323	4514	4517	2397
gctof	Hexoses	hexose	Peak height	439357	C00984	C([C@@H]1[C@@H]([C@@H]([C@H]([C@H](O1)O)O)O)O)O	WQZGKKKJIJFFOK-PHYPRBDBSA-N	ONLI_0074	253	1851	17162	388	234	260	220	348	329	396	1887	440	227	434	302	340	112	17319	365	411	677	282	500	26	1425	45	303	430	388	185	113	829	439	290	394	108	259	313	452	149	434
gctof	Sugar alcohols	hexitol	Peak height	11850	C01697	C([C@H]([C@@H]([C@@H]([C@H](CO)O)O)O)O)O	FBPFZTCFMRRESA-GUCUJZIJSA-N	ONLI_0075	1039	1593	3070	2337	1214	3187	1979	3155	3801	1466	2649	3640	623	2059	2185	2409	1582	1485	2401	1507	2510	1803	1794	2864	2482	2279	2218	1269	1065	1509	632	1928	1517	2069	1426	1443	1452	1267	1325	1764	815
gctof	Alkanes	hexadecane	Peak height	11006	C14499	CCCCCCCCCCCCCCCC	DCAYPVUWAIABOU-UHFFFAOYSA-N	ONLI_0076	18570	21359	10311	6665	10338	11061	16056	10161	8863	14488	10237	17098	20374	9830	17194	11888	11071	8434	15392	14497	14626	6311	18115	23208	30011	17695	18978	10028	12423	13345	20435	17882	9367	9479	16881	15565	17379	14525	9367	17556	15528
gctof	Alpha hydroxy acids and derivatives	glycolic acid	Peak height	757	C00160	C(C(=O)O)O	AEMRFAOFKBGASW-UHFFFAOYSA-N	ONLI_0078	14666	18612	10441	13628	10087	16466	28367	17883	16478	17901	12675	10868	7782	24846	21592	20808	14140	9839	18422	33872	18646	23863	18344	11880	9972	16435	18703	13244	18949	21455	10547	16913	17537	15746	6833	12703	23903	16664	22513	14520	11982
gctof	Alpha amino acids	glycine	Peak height	750	C00037	C(C(=O)O)N	DHMQDGOQFOQNFH-UHFFFAOYSA-N	ONLI_0079	176584	156521	104282	172656	136200	193430	173491	139273	178304	152864	143815	133725	173274	158274	171974	153776	207261	166924	185140	139297	167849	149325	191441	126391	142185	169231	206847	137258	198456	159342	125743	129046	179115	118428	162118	163139	145404	115254	170819	160927	194399
gctof	Glycerophosphates	glycerol-alpha-phosphate	Peak height	439162	C00093	C([C@H](COP(=O)(O)O)O)O	AWUCVROLDVIAJX-GSVOUGTGSA-N	ONLI_0080	1943	1212	1239	1057	1746	1154	1469	2330	1416	469	988	2409	850	563	665	1822	1000	1247	1091	1282	1809	1109	768	1333	1206	1532	1587	824	764	791	952	900	789	1420	1447	946	868	1270	1515	1687	1173
gctof	Glycosylglycerols	glycerol-3-galactoside	Peak height	656504	C05401	C([C@@H]1[C@@H]([C@@H]([C@H]([C@@H](O1)OCC(CO)O)O)O)O)O	NHJUPBDCSOGIKX-VGPGGAHRSA-N	ONLI_0081	695	3370	488	1524	2078	891	1062	754	2478	1620	833	2148	2093	640	1623	3487	1766	1941	1487	1736	1896	1717	1760	4419	3336	2210	3821	2390	2773	1158	1958	3930	1966	1984	1031	1277	933	1348	1953	716	1428
gctof	Sugar alcohols	glycerol	Peak height	753	C00116	C(C(CO)O)O	PEDCQBHIVMGVHV-UHFFFAOYSA-N	ONLI_0082	251154	214320	292963	257658	316765	277609	310359	249976	174807	178702	215855	200505	249452	255073	332182	277182	242714	292489	218432	303579	264157	377518	260908	175618	220002	256309	218422	251039	215986	290502	240130	212280	261491	227720	242729	302089	401045	255507	154637	340784	762311
gctof	Sugar acids and derivatives	glyceric acid	Peak height	439194	C00258	C([C@H](C(=O)O)O)O	RBNPOMFGQQGHHO-UWTATZPHSA-N	ONLI_0083	15870	7487	11533	11304	11848	6321	11265	11417	9993	7392	6568	6710	10500	7361	9568	9921	2807	3805	10823	7226	9135	6535	8292	5035	5779	4335	7434	1463	6294	9792	7203	1697	7305	8698	6113	6783	6845	8412	7932	9230	8187
gctof	Monosaccharide phosphates	glucose-1-phosphate	Peak height	439165	C00103	C([C@@H]1[C@H]([C@@H]([C@H](C(O1)OP(=O)(O)O)O)O)O)O	HXXFSFRBOHSIMQ-GASJEMHNSA-N	ONLI_0086	2546	2699	3761	3812	4257	2113	2409	2901	2827	3423	2987	2337	1962	2324	1649	2741	2598	3927	2195	3457	3274	2744	2131	2528	1475	2442	2515	2344	3038	2186	1359	1614	2127	1929	1743	3535	1739	2307	2861	1375	2975
gctof	Hexoses	glucose	Peak height	64689	C00221	C([C@@H]1[C@H]([C@@H]([C@H]([C@@H](O1)O)O)O)O)O	WQZGKKKJIJFFOK-VFUOTHLCSA-N	ONLI_0087	76852	113129	99438	121818	115359	125334	146391	77403	72375	100432	114259	38652	52203	95279	85740	82169	74512	110611	93030	98622	104298	70550	101117	103296	87209	119918	85345	80180	103667	9451	3836	108485	83771	84992	65740	70971	80994	62786	95191	37691	84665
gctof	Dicarboxylic acids and derivatives	fumaric acid	Peak height	444972	C00122	C(=C/C(=O)O)\C(=O)O	VZCYOOQTPOCHFL-OWOJBTEDSA-N	ONLI_0088	9763	7330	12214	13311	3388	8987	8789	4447	5985	7033	4896	6641	7091	3227	4383	13701	10939	17250	1725	1528	6820	3335	1321	1764	3402	2610	12728	3290	3855	8688	8965	5351	2953	2912	3236	7539	2549	2175	2897	5710	8857
gctof	Hexoses	fucose	Peak height	439650	C02095	C[C@@H]1[C@@H]([C@@H]([C@H]([C@@H](O1)O)O)O)O	SHZGCJCMOBCMKK-FPRJBGLDSA-N	ONLI_0089	1452	1045	1260	1457	1676	1407	1589	684	1104	1277	1648	351	803	1702	1322	1704	1326	1428	636	870	1207	1150	746	1040	620	1122	1242	659	1090	1090	582	903	749	851	1339	1071	836	563	814	1422	835
gctof	C-glycosyl compounds	fructose	Peak height	439709	C02336	C([C@@H]1[C@H]([C@@H]([C@](O1)(CO)O)O)O)O	RFSUNEUAIZKAJO-ARQDHWQXSA-N	ONLI_0090	4184	3842	2524	2628	2246	2947	3125	98124	6735	7322	5552	5274	8279	886	3607	1775	3891	3468	886	113644	3322	4551	3492	30859	886	3123	2381	886	4128	22274	3389	886	886	886	886	8217	11646	4847	886	4184	6700
gctof	1,2-aminoalcohols	ethanolamine	Peak height	700	C00189	C(CO)N	HZAXFHJVJLSVMW-UHFFFAOYSA-N	ONLI_0091	36760	36224	43843	45613	60204	35616	63330	29262	43629	35964	36708	33492	34746	34879	35286	56401	29912	43737	30982	32989	25619	44907	31227	26895	37155	33017	37879	27644	31496	36535	30745	28188	26096	25537	27462	30634	35995	24033	29057	45044	36571
gctof	Sugar alcohols	erythritol	Peak height	169019	C16884	C([C@H]([C@@H](CO)O)O)O	UNXHWFMMPAWVPI-QWWZWVQMSA-N	ONLI_0092	4271	3488	2778	2705	3335	2841	3189	822	2957	2848	4097	5295	3818	2704	1030	2291	2482	3409	3500	3201	4293	2156	2010	2131	2767	2151	2998	6204	2755	3810	3370	2995	4250	4829	4568	2484	2865	3529	3389	1868	3060
gctof	Fatty alcohols	dodecanol	Peak height	8193	C02277	CCCCCCCCCCCCO	LQZZUXJYWNFBMV-UHFFFAOYSA-N	ONLI_0093	1371	1218	1611	1613	1453	1260	1199	1023	1127	1207	1639	1151	899	1376	1635	1122	1397	1539	1107	1371	1213	1333	1499	1230	2016	1959	2081	1204	1295	1308	2143	1188	1328	1202	1648	1549	1825	1155	1090	1432	1686
gctof	1,2-aminoalcohols	D-erythro-sphingosine	Peak height	5280335	C00319	CCCCCCCCCCCCC/C=C/[C@H]([C@H](CO)N)O	WWUZIQQURGPMPG-KRWOKUGFSA-N	ONLI_0094	3588	1664	2343	5342	2111	987	930	1898	2838	1586	1919	1965	7640	5910	1647	1189	7633	3539	2978	4787	1958	2646	660	6089	5068	2848	2901	5512	3438	4657	6431	4275	2085	5112	4867	4338	3047	4237	6971	10012	3636
gctof	L-cysteine-S-conjugates	cystine	Peak height	67678	C00491	C([C@@H](C(=O)O)N)SSC[C@@H](C(=O)O)N	LEVWYRKDKASIDU-IMJSIDKUSA-N	ONLI_0095	1441	3037	3511	6397	1996	1777	2010	843	487	451	439	408	965	482	368	724	2023	2400	318	432	504	1534	934	1279	636	1072	739	301	1072	479	1279	715	448	251	226	1440	504	117	649	2271	993
gctof	Cysteine and derivatives	cysteine	Peak height	5862	C00097	C([C@@H](C(=O)O)N)S	XUJNEKJLAYXESH-REOHCLBHSA-N	ONLI_0096	2201	190	3133	2828	2636	1224	1871	239	250	89	2906	26	1580	146	241	600	2038	3070	202	145	179	569	366	221	118	5632	3552	130	734	1813	2027	80	121	135	1585	1350	172	151	383	2124	2000
gctof	Oxepanes	conduritol-beta-epoxide	Peak height	9989541		[C@@H]1([C@@H]([C@H](C2C([C@@H]1O)O2)O)O)O	ZHMWOVGZCINIHW-SPHYCDKFSA-N	ONLI_0098	2351	5167	3872	6911	3782	4303	3497	4909	5700	3587	2238	4670	2033	3474	2805	6957	2756	4627	3795	2743	2855	4200	3342	2371	2939	2658	5157	2652	3716	2909	3006	3354	2276	2218	1150	1547	1655	2368	3377	1893	2990
gctof	Tricarboxylic acids and derivatives	citric acid	Peak height	311	C00158	C(C(=O)O)C(CC(=O)O)(C(=O)O)O	KRKNYBCHXYNGOX-UHFFFAOYSA-N	ONLI_0100	128199	129456	148945	352059	191392	133148	152408	153646	93911	117934	148889	174217	113338	200653	149185	135456	147705	214391	104012	91196	134255	154497	149544	138802	77822	150583	228771	141327	148123	118443	141962	98381	81876	95193	94929	131772	115502	88920	74472	116586	111795
gctof	Catechols	catechol	Peak height	289	C00090	C1=CC=C(C(=C1)O)O	YCIMNLLNPGFGHC-UHFFFAOYSA-N	ONLI_0101	801	572	382	864	846	679	615	603	838	728	300	705	548	359	1058	1449	849	996	418	568	609	1148	863	593	739	474	873	426	1171	678	1089	898	696	573	401	694	559	514	701	466	810
gctof	Medium-chain fatty acids	caprylic acid	Peak height	379	C06423	CCCCCCCC(=O)O	WWZKQHOCKIZLMA-UHFFFAOYSA-N	ONLI_0102	3391	2602	3828	4891	3457	2885	2701	2021	3415	3506	2187	3399	3338	2755	3702	2646	3290	3309	3667	2619	2591	3006	3344	2311	2259	2511	3856	3568	2946	4042	3131	2212	2679	3292	2950	3304	2855	3685	3499	4162	4076
gctof	Medium-chain fatty acids	capric acid	Peak height	2969	C01571	CCCCCCCCCC(=O)O	GHVNFZFCNZKVNT-UHFFFAOYSA-N	ONLI_0103	1581	1245	1648	1028	1060	1624	1271	847	1095	846	1236	1999	1193	280	1304	1105	1316	1153	1175	988	1034	1129	1096	1028	1268	804	1736	969	1246	1305	1531	1197	1068	1019	1259	1399	1356	1330	1017	1142	1408
gctof	Beta amino acids and derivatives	beta-alanine	Peak height	239	C00099	C(CN)C(=O)O	UCMIRNVEIXFBKS-UHFFFAOYSA-N	ONLI_0104	17683	11432	21147	17690	20461	19996	21108	15091	16831	19646	18224	32524	25325	22850	17658	15454	20094	19785	25677	16880	12804	21257	14640	15196	17991	9062	7694	18136	16416	21166	20367	13205	22049	19612	20375	14330	23010	16350	18549	11632	9181
gctof	Benzoic acids	benzoic acid	Peak height	243	C00180	C1=CC=C(C=C1)C(=O)O	WPYMKLBDIGXBTP-UHFFFAOYSA-N	ONLI_0105	8184	3728	8158	9374	6749	6642	5368	20206	3959	16836	7647	19534	14882	10336	13080	30288	8155	6445	20438	8421	9802	6391	7331	15142	21801	3648	17673	31361	5689	19041	22058	2890	8554	3074	9937	11859	24683	19609	10879	10580	9375
gctof	Alpha amino acids	aminomalonate	Peak height	100714	C00872	C(C(=O)O)(C(=O)O)N	JINBYESILADKFW-UHFFFAOYSA-N	ONLI_0109	3799	1812	2161	3360	4239	2808	2647	9877	1348	39637	1627	470	11822	5289	3793	2821	6409	4143	14988	8142	16115	3372	2384	2826	5031	2569	2558	470	2481	9130	3942	2230	11007	470	288581	2988	33538	470	470	3399	2584
gctof	Gamma-keto acids and derivatives	alpha-ketoglutarate	Peak height	51	C00026	C(CC(=O)O)C(=O)C(=O)O	KPGXRSRHYNQIFN-UHFFFAOYSA-N	ONLI_0110	2400	5510	3201	5194	9844	5989	3140	4096	4694	5104	4072	6652	2939	3645	4242	6091	3100	5421	3077	2483	7411	2037	2626	2709	2853	1931	4976	5176	2786	3607	2693	2911	2839	3496	3636	3140	1616	2736	1520	2221	2439
gctof	Alpha amino acids	alpha-aminoadipic acid	Peak height	469	C00956	C(CC(C(=O)O)N)CC(=O)O	OYIFNHCXNCRBQI-UHFFFAOYSA-N	ONLI_0111	243	1363	631	906	986	1919	1310	684	1452	388	1315	298	1213	1573	1023	2089	1635	1477	1191	1102	1023	1170	1196	462	818	773	898	342	1599	671	857	973	779	645	242	957	942	830	1279	864	1201
gctof	Alanine and derivatives	alanine	Peak height	5950	C00041	C[C@@H](C(=O)O)N	QNAYBMKLOCPYGJ-REOHCLBHSA-N	ONLI_0113	928666	1750252	779146	959134	978311	1794857	1110918	903849	1613679	875669	1273555	835486	1080713	854809	1242901	1720234	1065889	1074560	979589	919999	1156945	1275174	1111202	1082851	781709	1144826	1082418	767609	963829	1089714	856297	1050720	1201373	830756	661047	777690	818892	1108015	1194698	507906	1122091
gctof	Purine nucleosides	adenosine	Peak height	60961	C00212	C1=NC(=C2C(=N1)N(C=N2)[C@H]3[C@@H]([C@@H]([C@H](O3)CO)O)O)N	OIRDTQYFTABQOQ-KQYNXXCUSA-N	ONLI_0114	240	1300	163	360	9711	183	7401	62	1620	80	2762	43	132	124	97	71	153	321	107	122	106	227	733	382	318	119	561	340	223	133	289	98	381	113	544	1503	204	136	289	67	923
gctof	Hexoses	6-deoxyglucitol	Peak height	151266		C[C@H]([C@H]([C@@H]([C@H](CO)O)O)O)O	SKCKOFZKJLZSFA-JGWLITMVSA-N	ONLI_0115	1543	2541	1748	1783	2418	3328	3092	2952	3430	2873	423	2735	2811	3379	2566	3296	2120	2326	2202	3185	3559	1337	2120	2788	3804	2361	3392	1208	3035	2446	1975	3591	3104	3215	2235	1912	2952	2524	3083	1635	3419
gctof	Tryptamines and derivatives	5-methoxytryptamine	Peak height	1833	C05659	COC1=CC2=C(C=C1)NC=C2CCN	JTEJPPKMYBDEMY-UHFFFAOYSA-N	ONLI_0116	2103	1032	2862	11291	7698	2472	7921	7292	4277	397	545	76	325	131	1281	13994	357	735	67	219	275	828	3314	491	613	154	290	198	169	261	838	133	326	58	117	3618	112	87	154	253	1367
gctof	Hydroxy fatty acids	4-hydroxybutyric acid	Peak height	10413	C00989	C(CC(=O)O)CO	SJZRECIVHVDYJC-UHFFFAOYSA-N	ONLI_0117	8794	7289	11254	9316	8041	8091	5539	5606	6479	7790	6095	4463	12484	5760	7909	7806	9207	8182	6881	8544	7043	8555	7736	7200	8260	6853	9593	4604	6451	10972	9221	8694	7455	3391	10710	9655	4038	3129	4608	10621	9732
gctof	Beta hydroxy acids and derivatives	3-hydroxypropionic acid	Peak height	68152	C01013	C(CO)C(=O)O	ALRHLSYJTWAHJZ-UHFFFAOYSA-N	ONLI_0118	4167	3116	3588	3548	3322	2734	3564	2784	3121	3373	5419	3422	4532	2890	3239	3543	3579	3017	3669	2788	3056	3264	2875	2696	3427	2991	3112	3219	2859	4238	3570	4256	3335	2649	4590	4243	3035	3060	2709	3036	4474
gctof	Beta hydroxy acids and derivatives	3-hydroxybutyric acid	Peak height	92135	C01089	C[C@H](CC(=O)O)O	WHBMMWSBFZVSSR-GSVOUGTGSA-N	ONLI_0119	7654	103490	212287	119584	118991	76463	155281	130770	100060	118484	68126	52865	73829	60583	116904	140280	31704	108282	63463	85692	53368	138234	197207	124411	166844	197286	109315	61275	66437	59076	78810	14939	72150	29834	112254	8941	200440	55084	94788	209673	9061
gctof	Beta amino acids and derivatives	3-aminoisobutyric acid	Peak height	64956	C05145	CC(CN)C(=O)O	QCHPKSFMDHPSNR-UHFFFAOYSA-N	ONLI_0120	683	406	1040	843	1370	1213	1127	977	1154	1055	522	246	1854	662	931	695	1229	1127	1061	1352	858	1329	821	750	746	399	556	1112	1315	314	1263	596	1019	964	1139	2163	1593	1031	1055	779	239
gctof	Tetrahydrofurans	3,6-anhydro-D-galactose	Peak height	16069996	C06474	C1[C@H]([C@@H]([C@H](O1)[C@H](C=O)O)O)O	WZYRMLAWNVOIEX-BGPJRJDNSA-N	ONLI_0121	945	1455	779	962	713	782	779	893	906	655	959	785	628	782	1024	1038	987	937	688	807	1002	1097	1359	1354	862	1116	1828	862	1283	696	837	874	705	712	907	1013	782	919	778	1035	3161
gctof	Phenylpropanoic acids	3-3-hydroxyphenylpropionic acid	Peak height	91	C11457	C1=CC(=CC(=C1)O)CCC(=O)O	QVWAEZJXDYOKEH-UHFFFAOYSA-N	ONLI_0122	7584	8759	6268	9891	657	386	1844	3138	408	6837	3376	3657	8055	6749	6474	9209	526	506	410	382	5010	6712	2861	4125	7054	334	1236	615	505	796	8436	660	541	502	5308	746	467	1783	411	7116	334
gctof	Short-chain keto acids and derivatives	2-ketoisocaproic acid	Peak height	70	C00233	CC(C)CC(=O)C(=O)O	BKAJNAXTPSGJCU-UHFFFAOYSA-N	ONLI_0123	10085	13899	13686	7083	11506	14405	9478	16052	9495	12750	11673	16282	14454	12671	16652	7621	13993	10145	10227	10788	19331	16410	13972	7450	9034	13324	10541	10547	3685	16548	11236	8499	10954	7895	14091	17391	16111	11500	6873	12413	10471
gctof	Short-chain hydroxy acids and derivatives	2-hydroxyglutaric acid	Peak height	439939	C03196	C(CC(=O)O)[C@@H](C(=O)O)O	HWXBTNAVRSUOJR-VKHMYHEASA-N	ONLI_0124	975	1363	1277	2072	1468	1736	2169	807	1932	1135	1512	1714	801	1395	801	1948	1339	2451	1018	1234	1326	856	2062	963	1189	1439	1893	905	1027	518	1309	1346	874	1104	1291	1543	1194	1299	1008	455	1438
gctof	Alpha hydroxy acids and derivatives	2-hydroxybutanoic acid	Peak height	11266	C05984	CCC(C(=O)O)O	AFENDNXGAFYKQO-UHFFFAOYSA-N	ONLI_0125	145677	21077	48814	20072	21166	14092	10382	48294	26239	45636	311022	163854	49056	40884	31149	34452	31387	13935	66805	39518	28046	17261	20772	23117	17430	25756	16929	42875	23088	34163	37043	50129	28657	79806	2514	8605244	53235	20248	42802	422200	21574
gctof	Beta hydroxy acids and derivatives	2-deoxytetronic acid	Peak height	150929		C(C(CO)O)C(=O)O	DZAIOXUZHHTJKN-UHFFFAOYSA-N	ONLI_0126	1652	1424	1539	1239	1913	348	1800	366	1136	1298	1424	1585	1543	1474	1422	1755	1225	1765	720	1490	1532	1507	1444	1200	1666	1433	1675	1406	1124	1698	1624	1518	1458	1559	1427	1380	1468	1069	1231	1356	1431
gctof	L-alpha-amino acids	2-aminobutyric acid	Peak height	80283	C02356	CC[C@@H](C(=O)O)N	QWCKQJZIFLGMSD-VKHMYHEASA-N	ONLI_0127	17427	31246	16485	24220	9497	19213	16390	17802	41417	39415	21687	11292	29087	23228	28639	26753	21349	10283	17354	20909	18792	25105	31800	17835	27867	36217	12924	17390	25761	32679	14652	38868	33229	16601	24434	38198	21985	24255	29719	31159	33204
gctof	Triazinones	1,3,5-trimethylcyanuric acid	Peak height	13225	C00526	CN1C(=O)N(C(=O)N(C1=O)C)C	AHWDQDMGFXRVFB-UHFFFAOYSA-N	ONLI_0128	43904	40239	46299	36013	43646	42527	37332	34978	43810	39022	44588	37275	42909	42917	38110	39275	41189	44184	44536	35618	37566	46192	42278	34405	38869	41034	45802	41139	41327	43869	45281	40029	46350	41718	44464	41957	24086	43558	39668	43857	42642
CSHPOS	Phosphosphingolipids	SM d38:1	Peak height	44260124	C00550	CCCCCCCCCCCCCCCCCCCC(=O)N[C@@H](COP(=O)([O-])OCC[N+](C)(C)C)[C@@H](/C=C/CCCCCCCCCCCCC)O	AADLTHQNYQJHQV-SVLGDMRNSA-N	ONLI_0155	509434	405040	433463	401892	502612	694762	576593	435118	289611	356689	626900	461354	556279	512246	429878	388985	418164	548486	441431	474158	668057	394396	411380	530880	383044	566875	481767	525564	638434	391161	460325	348143	594621	399238	796832	422503	500912	469512	632780	458056	445287
CSHPOS	Triacylglycerols	TAG 56:10; TAG 18:2-18:3-20:5;	Peak height	131763301		CCCCC/C=C\C/C=C\CCCCCCCC(=O)OC[C@@H](COC(=O)CCC/C=C\C/C=C\C/C=C\C/C=C\C/C=C\CC)OC(=O)CCCC/C=C\C/C=C\C/C=C\CCCCC	CEGFLXYMGPCHEY-MOSCTQMVSA-N	ONLI_0156	729243	273967	201400	253143	315090	343829	295110	357699	255292	280012	323214	257195	314680	167155	316431	143040	546807	448235	391051	494604	325006	402166	511400	382506	361677	643106	787299	331133	425372	412224	677878	309186	531726	270284	465504	559560	326467	262458	522391	308477	134258
CSHPOS	Triacylglycerols	TAG 58:7; TAG 18:1-18:1-22:5;	Peak height	131760076		CCCCCC/C=C\CCCCCCCCCC(=O)OC[C@@H](COC(=O)CCCCC/C=C\C/C=C\C/C=C\C/C=C\C/C=C\CC)OC(=O)CCCCCCCCC/C=C\CCCCCC	AANCKINPVVQDGX-OSUITXOZSA-N	ONLI_0157	1776288	1724390	742250	1681502	3021339	2155286	1530934	1588605	2075372	1591340	1916246	5888001	4380590	941622	2348805	910594	3276963	3435397	5854422	1851506	5047120	1713044	1295519	930990	3438982	1220538	3494242	3586078	4039188	2405154	2149036	1643338	4761344	3310267	1541250	1413496	829393	1162878	1038059	726417	4357922
CSHPOS	Acyl carnitines	AC 14:1	Peak height	90659872		CCCC/C=C\CCCCCCCC(=O)O[C@H](CC(=O)[O-])C[N+](C)(C)C	ABVVZYXTZLEOHP-OLHLWXQYSA-N	ONLI_0158	190452	91520	293086	280697	257909	128724	219265	308772	56638	90676	163652	129790	138451	244710	80316	94481	150539	156854	103517	270946	159640	148756	236364	286528	343680	305749	90771	164614	184352	188084	160020	115330	138918	126188	310648	337142	387435	116222	92542	275604	98376
CSHPOS	Triacylglycerols	TAG 54:7; TAG 18:2-18:2-18:3;	Peak height	100977823		CCCCC/C=C\C/C=C\CCCCCCCC(=O)OC[C@@H](COC(=O)CCCCCCC/C=C\C/C=C\C/C=C\CC)OC(=O)CCCCCCC/C=C\C/C=C\CCCCC	NGPHUAVENUDDAO-GZNXBNPNSA-N	ONLI_0159	3421049	4518047	1351453	4678385	9991861	4119998	1881026	3515996	12291984	9920342	3750126	10268843	18449962	1741132	8919264	8114968	12837254	11231889	19532388	13032223	18226316	7878586	8088364	4851405	16986934	5068497	24321080	12732569	37478060	14037190	8492675	23533466	32096278	13762347	2349992	5395695	1997466	4151419	18628946	1713183	27650700
CSHPOS	Phosphatidylcholines	PC(22:6(4Z,7Z,10Z,13Z,16Z,19Z)/18:0)	Peak height	52923691		CCCCCCCCCCCCCCCCCC(=O)O[C@H](COC(=O)CC/C=C\C/C=C\C/C=C\C/C=C\C/C=C\C/C=C\CC)COP(=O)([O-])OCC[N+](C)(C)C	AHWXJDWBIIDPKS-TZUVPVEASA-N	ONLI_0160	2312778	1548816	1850645	2749098	2469930	3155668	1992230	1978367	1071636	1277023	2009290	2222765	2356441	1853505	1183019	1228496	3187754	2170022	1739842	1757647	3150252	1955762	1492986	1181540	1158197	1396712	1287610	2893246	1927995	1412934	1300517	1311424	2597718	2195926	2629223	1328237	1286696	1284170	2346113	2099628	1997370
CSHPOS	Linoleic acids and derivatives	DAG 36:2; DAG 18:0-18:2;	Peak height	6441562		CCCCCCCCCCCCCCCCCC(=O)OC[C@H](CO)OC(=O)CCCCCCC/C=C\C/C=C\CCCCC	AJMZUFBKADIAKC-SKTOPKGQSA-N	ONLI_0161	540496	722547	422785	812858	1076660	765677	496917	665219	783706	692875	680703	1114169	954984	473817	692962	339484	843877	1038172	1151533	541857	1478998	518353	530158	497837	622641	442544	780889	1002358	1244930	842428	915016	568070	1215262	1258409	537207	712554	371090	463099	422589	385730	1216404
CSHPOS	Triacylglycerols	TAG 55:2; TAG 17:0-18:1-20:1;	Peak height	134718461		CCCCCCCCCCCCCCCCC(=O)OC[C@H](COC(=O)CCCCCCCCC/C=C/CCCCCCCC)OC(=O)CCCCCCCCC/C=C/CCCCCC	AKDAPWJIGQLALK-XSUIJCOHSA-N	ONLI_0162	180664	132906	39381	186272	262698	315756	152963	135516	172110	105912	365324	785191	365267	58183	259838	52341	365537	381946	611712	180267	562617	59677	112755	39888	334796	171504	225977	219122	403777	138964	184968	157701	608842	317815	45764	122564	34924	110045	150608	0	468434
CSHPOS	Cholesteryl esters	9-HODE cholesteryl ester	Peak height	71684431		CCCCC/C=C\C=C\C(CCCCCCCC(=O)O[C@H]1CC[C@@]2([C@H]3CC[C@]4([C@H]([C@@H]3CC=C2C1)CC[C@@H]4[C@H](C)CCCC(C)C)C)C)O	ALWABJCAEDQEGO-SGAXLBQASA-N	ONLI_0163	26819	42666	53776	42124	140108	32100	0	86536	29687	0	35175	32236	25186	32449	32371	39029	28609	36110	34728	29581	34481	34807	29083	33387	0	0	39575	30979	0	24051	0	0	82672	33372	27457	0	0	0	28169	52009	0
CSHPOS	Phosphatidylethanolamines	PE38:4	Peak height	46891781	C21480	CCCCCCCCCCCCCCCCCC(=O)OC[C@H](COP(=O)([O-])OCC[NH3+])OC(=O)CCC/C=C\C/C=C\C/C=C\C/C=C\CCCCC	ANRKEHNWXKCXDB-BHFWLYLHSA-N	ONLI_0164	1901756	1507500	1119189	1234994	2076927	1678931	1613562	1217500	1054528	1071378	1514051	2089410	1854245	1131528	1226485	834022	2178869	2603410	2032817	1938406	2750007	1262933	1375144	1285309	1068878	1477435	2208378	1843892	2448639	1023628	1786921	1305135	2409727	1869290	1963896	1393136	1011720	1258364	1831146	791115	1700379
CSHPOS	Phosphocholines	SM d42:4; SM d14:2/28:2;	Peak height	138120868		CCCCCCCCCCC/C=C\C/C=C\CCCCCCCCCCCC(=O)NC(COP(=O)([O-])OCC[N+](C)(C)C)C(/C=C/CC/C=C/CCCCC)O	APVVIKGWDUMMAY-VIVRHXLSSA-N	ONLI_0165	440397	579506	853189	692924	822438	761445	671100	795105	554663	743901	578238	582855	638721	794286	840163	824372	617639	694056	611283	717249	751080	842541	769491	934408	674077	785093	566392	769400	654127	899903	665901	817337	669014	505621	693824	636072	859615	707612	908878	775883	639290
CSHPOS	Phosphatidylcholines	PC 38:4; PC 18:0-20:4;	Peak height	53478701	C00157	CCCCCCCCCCCCCCCCCC(=O)OC[C@H](COP(=O)([O-])OCC[N+](C)(C)C)OC(=O)CCCCCC/C=C\C/C=C\C/C=C\C/C=C\CC	HAKKEJDMTIQLJH-UGKDIXSWSA-N	ONLI_0167	287093984	228046928	367928256	397744864	293096832	336897184	326675808	397707424	254311088	269817792	294708064	275355520	319079552	397377664	235959840	277662848	306557152	301995424	237445408	222731024	351722880	301478272	403220768	380985184	302515328	420714528	210028656	364817600	253764128	352004832	386677760	365905728	344255200	360757280	442618496	427002912	423345760	469814336	307711328	500283072	245321776
CSHPOS	Phosphatidylcholines	PC36:1	Peak height	24778825	C00157	CCCCCCCCCCCCCCCCCC(=O)OC[C@H](COP(=O)([O-])OCC[N+](C)(C)C)OC(=O)CCCCCCC/C=C\CCCCCCCC	ATHVAWFAEPLPPQ-VRDBWYNSSA-N	ONLI_0168	21608998	24323184	18791640	27338758	33711072	25474926	27659658	25049542	19186784	18661492	25183584	38569572	32098116	17283484	23405868	15101868	28415798	35756904	28558804	25434906	58923228	19341854	16188047	15517045	16562175	20523472	21446550	30448098	49683568	22604370	25545676	20404490	35373080	51674968	41145400	17447132	17821608	22716936	19460062	22356458	38760356
CSHPOS	Triacylglycerols	TAG 53:5; TAG 17:1-18:2-18:2;	Peak height	NA		0	0	ONLI_0169	693930	608197	322393	679298	1251504	863019	407061	482246	607338	657123	733747	1298135	1457451	303078	643582	397989	1460514	1274807	1655625	960038	1272243	602168	619038	388559	1082779	575966	1160836	1081657	1710470	983366	681434	727398	2236742	814098	379235	568562	299412	380058	774411	244553	1007208
CSHPOS	Phosphatidylethanolamines	PC35:3	Peak height	52924614		CCCCCCCCCCCCCCCCCC(=O)O[C@H](COC(=O)CCCCCC/C=C\C/C=C\C/C=C\CCCCC)COP(=O)(O)OCCN	AYXGHIQPMDYMJC-AHMBLZLYSA-N	ONLI_0170	5556449	5211152	2056256	3686758	5320500	5556158	4210943	2861408	2363480	2505125	3858902	4375177	5140433	2254604	2512001	2454892	5075102	5409745	5658336	5907378	5694946	3047473	2981776	1926479	2210834	2204701	5482526	6048390	6259554	3297338	2732608	2603392	6765290	4111047	4335956	2039595	1981056	2188800	5142528	1841662	3819414
CSHPOS	Alkyldiacylglycerols	TAG 49:0; TAG 15:0-16:0-18:0;	Peak height	131754177		CCCCCCCCCCCCCCCCCCOC[C@H](COC(=O)CCCCCCCCCCCCCC)OC(=O)CCCCCCCCCCCCCCC	AYHAGPSMXXZJSI-VCZQVZGSSA-N	ONLI_0171	131016	58226	50167	122301	142884	145624	71595	70473	158342	100619	244829	220028	223095	54088	175189	34853	137856	136095	289215	48105	255667	55204	125283	64120	325215	168782	120674	69581	146205	55350	124304	72729	186203	73521	47287	57430	50142	54173	58010	51102	160278
CSHPOS	1-acyl-sn-glycero-3-phosphoethanolamines	LPE 18:0	Peak height	9547068	C21484	CCCCCCCCCCCCCCCCCC(=O)OC[C@H](COP(=O)(O)OCCN)O	BBYWOYAFBUOUFP-JOCHJYFZSA-N	ONLI_0172	710934	717584	813726	876452	880442	814840	712251	945608	676330	782702	655629	857540	867437	956462	1097912	838072	800779	1008624	939301	836986	1251753	1008089	935903	1090934	1040203	918344	937384	864818	1118265	893318	965404	1110877	1075785	818493	851643	972505	990463	1043558	836022	861225	935396
CSHPOS	Triacylglycerols	TAG 53:1; TAG 17:0-18:0-18:1;	Peak height	138126516		CCCCCCCCCCCCCCCCCC(=O)OC(COC(=O)CCCCCCCCCCCCCCCC)COC(=O)CCCCCCCCC/C=C\CCCCCC	BHJLNGDWUXQOBH-QOCHGBHMSA-N	ONLI_0173	123122	123673	0	138693	151593	180972	60730	111645	176637	112905	218288	481917	202523	39570	146555	33404	172041	237564	394708	61231	422519	52347	51871	0	299975	66975	177793	107312	241243	127195	150608	134045	372048	133441	43365	52526	0	64191	64730	0	231846
CSHPOS	Triacylglycerols	TAG 60:13; TAG 18:2-20:5-22:6;	Peak height	131763450		CCCCC/C=C\C/C=C\CCCCCCCC(=O)OC[C@@H](COC(=O)CC/C=C\C/C=C\C/C=C\C/C=C\C/C=C\C/C=C\CC)OC(=O)CCC/C=C\C/C=C\C/C=C\C/C=C\C/C=C\CC	GKGVYCDLFAHWTQ-MYJMWWOYSA-N	ONLI_0175	1416738	432276	560460	764417	521962	813878	482937	1216168	447698	564832	682567	350590	510836	709794	371585	383481	1054442	640038	418119	722759	459383	1719116	1452724	882686	618839	1331549	918690	686567	469342	866655	1477088	598856	808073	357397	980997	1394073	937366	694848	1057371	828130	187972
CSHPOS	Triacylglycerols	TAG 47:0; TAG 15:0-16:0-16:0;	Peak height	131754153		CCCCCCCCCCCCCCCC(=O)OC[C@H](COC(=O)CCCCCCCCCCCCCC)OC(=O)CCCCCCCCCCCCCCC	BLIGKERFCBUUQF-MFERNQICSA-N	ONLI_0176	136690	134747	64249	158205	155137	250480	124920	151289	132620	155288	252697	333662	218505	187879	162165	69355	193066	235043	282222	111382	314120	123852	103092	98308	578192	170201	146152	127474	176276	111423	160076	70075	238146	132064	67955	81966	107003	126608	117429	105238	199556
CSHPOS	Linoleic acids and derivatives	DAG 36:3; DAG 18:1-18:2;	Peak height	9543722	C00165	CCCCCCCC/C=C\CCCCCCCC(=O)OC[C@H](CO)OC(=O)CCCCCCC/C=C\C/C=C\CCCCC	BLZVZPYMHLXLHG-JOBMVARSSA-N	ONLI_0177	1652964	1544222	1028453	1769903	2791832	1704042	1198883	1243260	1479604	1530272	1463811	1935851	1918950	1002612	1555523	941226	2095092	2788615	2480693	1850489	2329030	1374503	1409207	1246795	1539967	1422285	2149585	2258632	3002329	1916044	1665119	1256608	3230325	1771675	1203462	1531962	887801	890446	1233761	749825	1910367
CSHPOS	Phosphatidylcholines	PC38:7	Peak height	53479075	C00157	CCCCC/C=C\C/C=C\C/C=C\CCCCC(=O)O[C@H](COC(=O)CCCCCC/C=C\C/C=C\C/C=C\C/C=C\CC)COP(=O)([O-])OCC[N+](C)(C)C	BNNUJTATKJXKJP-XCDHYEIISA-N	ONLI_0178	9524714	9379379	2684287	5239164	14262360	9457517	4784416	5010856	11627784	7641096	6162412	16464672	21157536	2475844	10819760	8536623	14855591	16710538	19541010	20855838	23800790	10312830	8498291	3849422	9797633	3462772	23513720	21181822	25345840	8174934	7513620	11016444	24562606	21660732	9523991	4286614	3978165	6473398	23253996	3126436	15945210
CSHPOS	Phosphatidylcholines	PC40:7 A	Peak height	24778982		CCCCC/C=C\C/C=C\CCCCCCCC(=O)OC[C@H](COP(=O)([O-])OCC[N+](C)(C)C)OC(=O)CC/C=C\C/C=C\C/C=C\C/C=C\C/C=C\CCCCC	BPUROMFCPFGBOT-ZEGPSQTJSA-N	ONLI_0179	38940340	41643816	45275848	57077372	69139256	80086640	39848108	48572592	29944570	29725622	49229456	63624812	66414336	45806112	31420024	22024496	65669276	61187740	52744712	32888050	103568168	40541280	39859632	35256172	24579280	39586284	33147592	68170640	66888096	47647072	37141840	29624122	67067976	70902072	80338808	31389950	36431876	41017492	48492152	53658828	48139684
CSHPOS	Phosphatidylcholines	PC 39:7; PC 17:1-22:6;	Peak height	52922579		CCCCCCC/C=C\CCCCCCCC(=O)OC[C@H](COP(=O)([O-])OCC[N+](C)(C)C)OC(=O)CC/C=C\C/C=C\C/C=C\C/C=C\C/C=C\C/C=C\CC	BWMGYQAIDPQZGJ-VKOPMEPESA-N	ONLI_0180	633271	367763	412668	580788	540434	788622	301966	433134	355121	393280	616759	587153	573917	467260	364238	215238	710123	816250	529068	487724	1013266	341840	488926	354884	203259	492203	460533	714574	561171	371930	440667	366608	882531	643267	866978	405629	262156	394424	500326	399684	328780
CSHPOS	Phosphatidylcholines	PC36:3 A	Peak height	24778937		CCCCCCCC/C=C\CCCCCCCC(=O)OC[C@H](COP(=O)([O-])OCC[N+](C)(C)C)OC(=O)CCCC/C=C\C/C=C\CCCCCCCC	BXRLDROZWDUSGM-ZRYFCQOPSA-N	ONLI_0181	144627680	157356144	96045464	143967184	203336160	193733712	118148736	115839872	117224456	103503832	121390760	215330080	227173312	90684352	122841064	116796192	178378544	186632704	188404272	167891424	297886176	146004816	133443216	87044544	117828680	91381792	171473568	214108208	234806224	136571536	122812560	124226288	240431216	229723008	166858960	87868688	107938024	110169792	208689600	98084904	202753744
CSHPOS	Triacylglycerols	TAG 56:0; TAG 16:0-18:0-22:0;	Peak height	131755012		CCCCCCCCCCCCCCCCCCCCCC(=O)OC[C@H](COC(=O)CCCCCCCCCCCCCCC)OC(=O)CCCCCCCCCCCCCCCCC	CAPRXGZRZWSDGE-UWGNJQTFSA-N	ONLI_0182	68007	46740	78287	128105	127362	426576	55768	81328	269330	151493	412274	469463	272896	58284	210489	63013	150595	147287	256472	59742	441929	65888	210398	42164	1058464	115398	64589	53824	146607	55646	166791	139819	173131	126402	136460	134481	53805	79242	72373	76117	139669
CSHPOS	Triacylglycerols	TAG 52:7; TAG 16:1-18:2-18:4;	Peak height	131759572		CCCCCC/C=C\CCCCCCCC(=O)OC[C@@H](COC(=O)CCCC/C=C\C/C=C\C/C=C\C/C=C\CC)OC(=O)CCCCCCC/C=C\C/C=C\CCCCC	CMQKNURFVKDTED-HQIPLBRRSA-N	ONLI_0183	218951	154309	46262	122985	310463	255773	55966	141505	158981	184136	187734	269023	316295	51444	166687	49933	317294	357164	497056	246655	306096	152975	169061	112601	165344	201270	479205	297782	516450	242480	235139	156826	451576	188799	201710	156917	91224	48012	192925	54724	217301
CSHPOS	Triacylglycerols	TAG 58:10; TAG 16:1-20:4-22:5;	Peak height	131759657		CCCCCC/C=C\CCCCCCCC(=O)OC[C@@H](COC(=O)CC/C=C\C/C=C\C/C=C\C/C=C\C/C=C\CCCCC)OC(=O)CCC/C=C\C/C=C\C/C=C\C/C=C\CCCCC	FARJXFHQIBPRRK-MCQDRIRZSA-N	ONLI_0184	7270068	2513101	3351961	4364370	3995081	3741578	2014256	4537920	2962386	3569552	2747224	2775306	3843284	3344238	2859926	1897241	5596132	3941432	4022285	4390216	2795365	6650148	6637795	4544968	4236037	4203080	4192429	3776865	3243796	5165436	6225330	2893627	5469268	2160108	3424568	5946345	3353872	2922667	4079358	2717378	1736774
CSHPOS	1-alkyl,2-acylglycero-3-phosphocholines	PCo-44:5	Peak height	53481767		CCCCC/C=C\C/C=C\CCCCCCCCCCCCOC[C@H](COP(=O)([O-])OCC[N+](C)(C)C)OC(=O)CCCCCCCC/C=C\C/C=C\C/C=C\CCCCC	CEZAZXUWDFPTTE-FHIJIHMSSA-N	ONLI_0185	39487	29886	25234	0	45419	34944	0	28301	25824	0	27860	40111	27053	32828	28245	21524	0	36935	35219	26824	37152	0	29535	35874	28934	25266	28044	0	25063	30311	27795	33283	25806	39341	34882	41222	29724	31939	30688	38160	29262
CSHPOS	1-(1Z-alkenyl),2-acylglycerophosphoethanolamines	PEo-36:3	Peak height	53480897		CCCCCCCC/C=C\CCCCCCCC(=O)O[C@H](CO/C=C\CCCCCC/C=C\CCCCCCCC)COP(=O)(O)OCCN	CFANDHZPOSNKNO-UDHSZFGOSA-N	ONLI_0186	167401	199330	148487	154356	225088	135963	197400	129181	115226	138998	142731	216917	244325	133618	166131	170321	180162	266312	226378	282809	334421	180028	155328	156606	166301	166053	230937	204520	284776	160880	129049	222348	180079	210765	173960	140942	172444	162841	221141	142507	273897
CSHPOS	Triacylglycerols	TAG 60:2; TAG 18:1-20:1-22:0;	Peak height	131757450		CCCCCCCCCCCCCCCCCCCCCC(=O)OC[C@@H](COC(=O)CCCCCCCCC/C=C\CCCCCC)OC(=O)CCCCCCCCC/C=C\CCCCCCCC	CFOWRVBCJCEHTO-NYLLBKPFSA-N	ONLI_0187	139642	134319	0	200923	167418	536323	145170	138899	278325	163651	516405	1383204	648528	130355	227727	69831	283368	245005	452352	139825	1184635	75100	164279	42969	1552617	207678	189142	169337	307152	51633	160860	161773	547903	145338	101506	146956	54877	202639	169897	0	391050
CSHPOS	Cholesterols and derivatives	Zymosterol	Peak height	92746	C05437	C[C@H](CCC=C(C)C)[C@H]1CC[C@@H]2[C@@]1(CCC3=C2CC[C@@H]4[C@@]3(CC[C@@H](C4)O)C)C	CGSJXLIKVBJVRY-XTGBIJOFSA-N	ONLI_0188	550278	2142071	1476332	4356921	427576	16685512	4433980	7160882	10382784	1081742	6765320	25477014	19901286	809284	813313	1094912	3829161	630383	4386858	868241	12801177	3242116	2332127	803558	40774076	7472591	504918	814315	298686	1680710	510462	3553085	2521958	794341	2572223	1834403	4692624	14987636	3295686	1156499	1620224
CSHPOS	Triacylglycerols	TAG 54:3; TAG 16:0-18:0-20:3;	Peak height	131755017		CCCCCCCCCCCCCCCCCC(=O)O[C@@H](COC(=O)CCCCCCCCCCCCCCC)COC(=O)CCC/C=C\C/C=C\C/C=C\CCCCCCCC	CICXNKCKBFXJSH-LZWIKYMTSA-N	ONLI_0189	13396520	11615583	9351903	19049240	17077036	16669620	9198250	13840214	14478878	15101148	12848588	21965308	20677550	8556036	13832244	8494265	18533948	15470845	21059038	11234429	20497596	12806185	14316853	9362213	18207580	11444290	15802055	16207440	19116720	15857957	17824982	12629584	21722434	16881988	9709022	14601345	8276600	10102319	11959420	7908324	15328716
CSHPOS	Triacylglycerols	TAG 56:4; TAG 18:0-18:0-20:4;	Peak height	131750364	C00422	CCCCCCCCCCCCCCCCCC(=O)OC[C@@H](COC(=O)CCC/C=C\C/C=C\C/C=C\C/C=C\CCCCC)OC(=O)CCCCCCCCCCCCCCCCC	CIRJQIDEADRSMG-ZYKWSEAGSA-N	ONLI_0190	4022310	3193290	1336734	2802718	5529644	4283528	2151584	2244610	1454502	2370556	3499860	6171512	4668386	1179934	2953041	1004592	6238320	5145571	5678224	4229676	4415279	2150653	2256768	1324867	2628515	2150681	3951140	4153860	4222510	2657913	2940197	1572672	6157154	3209612	2008103	2292231	960883	1138016	2561459	1100035	4209644
CSHPOS	Triacylglycerols	TAG 54:1; TAG 18:0-18:0-18:1;	Peak height	131750547		CCCCCCCCCCCCCCCCCC(=O)OC[C@@H](COC(=O)CCCCCCCCC/C=C\CCCCCC)OC(=O)CCCCCCCCCCCCCCCCC	CXVKBFLPGNGMQW-NAWMRHBJSA-N	ONLI_0191	500035	622809	198545	531307	776405	877454	565830	367483	547242	491149	914041	5644914	2310303	168407	655983	254249	1059140	1444402	3198320	609230	3576776	313341	351156	235295	1368544	484910	1540983	1145347	2587095	351337	446247	412519	2960262	1703149	356856	332741	149045	372071	569295	139894	3223276
CSHPOS	Triacylglycerols	TAG 51:3; TAG 15:0-18:1-18:2;	Peak height	138140505		CCCCCCCCCCCCCCC(=O)OCC(COC(=O)CCCCCCCC/C=C\C=C/CCCCC)OC(=O)CCCCCCCCC/C=C\CCCCCC	CYSYJKJDVJLYTD-KDHVXLOFSA-N	ONLI_0192	1670262	1868528	627460	1709218	3135998	2650346	1270497	1455342	2702416	2059905	2421143	6139866	4395340	768352	1985088	951610	3446563	4103438	6616068	2091418	5009310	1285205	1128565	850323	3505510	1414082	3745240	3285372	4563992	2518226	1906061	1745553	5545924	2312251	1366569	1245399	593882	1168484	1347425	476830	3385452
CSHPOS	Sphingomyelins	SMd42:2	Peak height	52931217		CCCCCCCCCCCCCCCCCCCCCCCC(=O)N[C@@H](COP(=O)([O-])OCC[N+](C)(C)C)[C@@H](/C=C/CCCCCCCC/C=C\CCC)O	DACOGJMBYLZYDH-GXJPFUDISA-N	ONLI_0193	9073611	8484061	8902531	10064981	9151372	8476367	8821756	9107695	6097269	7467638	6894486	6733512	8033768	9054540	8494180	8179728	7936448	8996870	8206450	8153289	10854066	9371279	7292374	9489759	8249894	9057154	6948287	7553286	8223556	7622066	7401458	7809160	7424096	6092472	8575336	7812436	8178414	8470842	10069759	8701040	5616702
CSHPOS	1-acyl-sn-glycero-3-phosphoethanolamines	LPE18:2	Peak height	52925130		CCCCC/C=C\C/C=C\CCCCCCCC(=O)OC[C@H](COP(=O)(O)OCCN)O	DBHKHNGBVGWQJE-USWSLJGRSA-N	ONLI_0194	963527	909828	519859	961179	1055297	982678	920528	1181549	1045652	1168874	866282	1264076	1380332	634675	2067954	1248712	1517332	2064321	1511528	1775083	2121856	1694744	1259484	874995	1401784	1061419	1577823	1264964	1570256	1232046	1642356	1661494	1539225	1288897	569836	995392	785724	1291194	1031031	1060523	1799686
CSHPOS	Alkyldiacylglycerols	TAG 54:0; TAG 16:0-18:0-20:0;	Peak height	131755693		CCCCCCCCCCCCCCCCCCCC(=O)OC[C@H](COC(=O)CCCCCCCCCCCCCCC)OCCCCCCCCCCCCCCCCCC	FPBBGJFVHOTVDS-GNFJTHHVSA-N	ONLI_0195	278296	153665	290485	478722	170614	704278	248009	790538	424392	329384	706350	473636	795177	244462	374621	198428	936779	208641	600778	301409	550438	618214	543709	65520	906300	555745	274366	272647	184031	64829	1560104	332803	1295070	446266	418933	632905	365125	688960	872728	444179	265422
CSHPOS	1-(1Z-alkenyl),2-acyl-glycerophosphocholines	PCo-36:3	Peak height	53480801		CCCCCCCC/C=C\CCCCCCCC(=O)O[C@H](CO/C=C\CCCCCC/C=C\CCCCCCCC)COP(=O)([O-])OCC[N+](C)(C)C	DIHWZUCEXWUHOD-IIVNATNGSA-N	ONLI_0196	213536	169626	122034	175341	236268	174094	180600	119199	119334	114929	167261	245677	226571	164218	153062	163830	178653	225739	292306	219538	181615	172581	135650	145790	184919	140873	190582	220240	216707	119405	186584	134479	172429	217263	187684	128659	159633	116919	208040	61675	270205
CSHPOS	Triacylglycerols	TAG 48:3; TAG 12:0-18:1-18:2;	Peak height	138143748		CCCCCCCCCCCC(=O)OCC(COC(=O)CCCCCCCC/C=C\C=C/CCCCC)OC(=O)CCCCCCCCC/C=C\CCCCCC	DILVDBIGCVMQJQ-HQZFYGAOSA-N	ONLI_0197	309991	537549	139545	440709	1226408	817118	409808	273273	385498	702501	828673	1742403	1229468	208119	662987	176967	1189572	1909019	2245870	393530	2454240	381005	289140	214365	505209	396267	1279407	1226843	3185224	968057	548437	454454	1160072	966482	538811	319208	154051	287383	260143	154482	1971765
CSHPOS	Triacylglycerols	TAG 56:7; TAG 16:0-18:1-22:6;	Peak height	131755186		CCCCCCCCCCCCCCCC(=O)OC[C@@H](COC(=O)CC/C=C\C/C=C\C/C=C\C/C=C\C/C=C\C/C=C\CC)OC(=O)CCCCCCCCC/C=C\CCCCCC	DNTWVXNMAFTXDU-RVFBAGKZSA-N	ONLI_0198	11250264	10396000	6370917	11713098	13747787	14502352	9275380	13838204	12595353	13569638	10599458	28442610	25204206	9652313	12285707	7361394	18692682	18964910	27155484	9918679	23715826	14943370	10163303	8441792	23010412	10450319	17469644	16079257	20744240	21086888	20561752	10966733	29685740	14654994	10796704	11029361	8157113	10873153	8108810	7147976	14814364
CSHPOS	Triacylglycerols	TAG 48:3; TAG 14:0-16:0-18:3;	Peak height	131753281		CCCCCCCCCCCCCCCC(=O)O[C@@H](COC(=O)CCCCCCCCCCCCC)COC(=O)CCCC/C=C\C/C=C\C/C=C\CCCCC	ROOGPSPBLOJPPQ-MMNSDLEGSA-N	ONLI_0199	432092	612212	154339	677915	1398420	1172236	368336	450325	585419	933651	1274336	1977477	1442996	193368	924922	148668	1569618	2167832	2399022	524348	3058518	399721	363457	165404	425820	475813	1641811	1401577	3719702	1039365	1007008	431687	1346172	1314840	783852	363279	174243	299091	353823	188007	1820707
CSHPOS	Triacylglycerols	TAG 50:3; TAG 16:0-16:1-18:2;	Peak height	131750350	C00422	CCCCCCCCCCCCCCCC(=O)OC[C@@H](COC(=O)CCCCCCC/C=C\C/C=C\CCCCC)OC(=O)CCCCCCC/C=C\CCCCCC	HDFLQJUGWGNORO-NSVHLBAISA-N	ONLI_0200	10075100	15665807	4132356	13330708	36386516	25256688	16498302	9110187	16051176	17170014	25757420	62439972	41078328	5973853	18812160	4672702	35474836	55265268	63887332	13064661	71674592	8022840	8141727	6145762	19166456	14135152	37408216	36341940	74120528	23374606	17728244	10429116	42215392	31594312	17693104	9244999	6208506	9139238	8200620	4505715	50188268
CSHPOS	Triacylglycerols	TAG 50:0; TAG 16:0-16:0-18:0;	Peak height	99649112		CCCCCCCCCCCCCCCCCC(=O)OC[C@H](COC(=O)CCCCCCCCCCCCCCC)OC(=O)CCCCCCCCCCCCCCC	DQKMNCLZNGAXNX-DPDRHGIRSA-N	ONLI_0201	3746760	7598166	9500578	3159335	9051344	10334869	8379189	10768962	10377710	9924581	5776190	15934382	12734524	9203443	8338592	10047217	3650665	6420430	8494384	10316888	7571403	11030329	7428739	6969173	12427830	11483702	10476620	10820803	5072922	8434736	13271151	7259397	5182480	9339131	3254176	11417263	6643562	10093297	11710006	10968560	6927370
CSHPOS	Phosphatidylethanolamines	PE 16:0-20:4	Peak height	9546800	C00350	CCCCCCCCCCCCCCCC(=O)OC[C@H](COP(=O)(O)OCCN)OC(=O)CCC/C=C\C/C=C\C/C=C\C/C=C\CCCCC	DRIVXEVMDWCWLI-CAQMIEAISA-N	ONLI_0202	1232178	1465521	458158	735092	1931214	1247712	1385054	612230	533994	771007	1247285	2114565	1874711	618842	1029550	519493	2031429	2140805	1920218	1997546	2724133	969132	890140	531798	556617	700741	1832197	1642163	2297710	801923	884998	687481	2164818	1985694	1790198	746272	487537	487023	1089715	346937	1871395
CSHPOS	Phosphatidylcholines	PC42:6	Peak height	52923651	C00157	CCCCC/C=C\C/C=C\CCCCCCCCCC(=O)O[C@H](COC(=O)CCCCC/C=C\C/C=C\C/C=C\C/C=C\CCCCC)COP(=O)([O-])OCC[N+](C)(C)C	DSVRMAGYENFTLY-GDDYDVMSSA-N	ONLI_0203	1024830	991743	109688	129656	1054780	854123	1314076	133804	91347	135799	815202	1202547	976926	106281	116207	91261	1260639	1677070	1139952	926057	1548532	138982	125332	105225	106987	104256	1554455	1400471	1549372	168570	170948	113693	1698835	1314706	1427111	97678	109749	104556	743392	135747	1419836
CSHPOS	Triacylglycerols	TAG 56:3; TAG 18:1-18:1-20:1;	Peak height	131750410	C00422	CCCCCCCC/C=C\CCCCCCCCCC(=O)OC[C@H](COC(=O)CCCCCCC/C=C\CCCCCCCC)OC(=O)CCCCCCC/C=C\CCCCCCCC	QXMHHXQBBKDSSL-QGDSHWIZSA-N	ONLI_0205	1823746	1996279	452366	1331061	3689536	3272295	1392925	1051580	1228296	1237724	2534998	12170021	5721212	504236	1694256	569825	4246230	4261428	7558360	2123738	8847707	860370	844887	605502	2851052	1035160	3515319	3514860	5383329	1079118	1186902	965994	7352846	4729942	1170924	806768	376496	725913	1435172	337470	6816436
CSHPOS	Triacylglycerols	TAG 52:5; TAG 16:0-18:2-18:3;	Peak height	131755325		CCCCCCCCCCCCCCCC(=O)OC[C@@H](COC(=O)CCCC/C=C\C/C=C\C/C=C\CCCCC)OC(=O)CCCCCCC/C=C\C/C=C\CCCCC	PWAOXOJAJJJACV-MSFNIHOKSA-N	ONLI_0206	8388068	8829190	3113218	8587373	21895210	10520077	6622060	6552136	17112682	14753703	10403554	22925300	30953040	4003412	14161836	10084748	23560974	24451050	34804712	16694739	28124324	11677590	11574244	7964357	30489328	13794271	36755416	22551872	49870404	22142570	16074381	22956864	44915480	16693321	6996028	10462812	4749463	7461042	20031084	3588837	33614276
CSHPOS	Phosphatidylcholines	PC(18:0/22:6(4Z,7Z,10Z,13Z,16Z,19Z)	Peak height	24778876	C00157	CCCCCCCCCCCCCCCCCC(=O)OC[C@H](COP(=O)([O-])OCC[N+](C)(C)C)OC(=O)CC/C=C\C/C=C\C/C=C\C/C=C\C/C=C\C/C=C\CC	FAUYAENFVCNTAL-PFFNLMTBSA-N	ONLI_0207	49530132	41071508	77698944	73375952	68058648	66843764	62944200	81129176	48118348	42081472	54340488	66477240	70500576	74553800	65797264	36972084	65400592	71512960	53854420	39815312	97930912	60133928	84074320	82056032	49548324	95375080	47567968	74147152	69594688	80407784	133119680	61914004	78078000	90660752	100293592	80902648	84352168	95974040	52627156	110864888	57343284
CSHPOS	Triacylglycerols	TAG 46:2; TAG 12:0-16:0-18:2;	Peak height	NA		0	0	ONLI_0208	165454	120646	0	115421	230218	164793	48491	46249	146600	188006	221071	306791	242628	35368	225717	42091	242415	329178	416475	122275	568596	134021	45516	38694	276128	54013	323148	253720	671086	146471	145522	171196	346489	214212	116549	58176	35211	57528	144885	43278	532194
CSHPOS	Triacylglycerols	TAG 51:1; TAG 16:0-17:0-18:1;	Peak height	9544019		CCCCCCCCCCCCCCCCC(=O)O[C@H](COC(=O)CCCCCCCCCCCCCCC)COC(=O)CCCCCCC/C=C\CCCCCCCC	RHDRMOUSDQDVCE-IWRJKWNLSA-N	ONLI_0209	260087	241006	131841	316080	423942	452946	172009	200813	739194	315337	486635	1099926	592814	173306	510355	224942	352658	486832	949234	198860	967641	158217	178758	133509	858763	279397	521343	353743	675951	290456	375703	373430	809799	437236	143648	219274	110748	226348	251175	67521	742840
CSHPOS	Triacylglycerols	TAG 52:5; TAG 16:0-16:1-20:4;	Peak height	131750351	C00422	CCCCCCCCCCCCCCCC(=O)OC[C@@H](COC(=O)CCC/C=C\C/C=C\C/C=C\C/C=C\CCCCC)OC(=O)CCCCCCC/C=C\CCCCCC	BURBQZUNMNAKMA-RAKRAUFVSA-N	ONLI_0210	7247519	6942193	3642914	7565660	12576470	9286107	5069804	6114065	9613684	9361241	9533339	11960462	12320361	4182701	9141180	5647750	13276468	13639192	13308214	9402155	12306566	8146716	7835546	5833699	10684437	10116545	13147227	11552197	14171416	11200584	13073796	9004761	13160306	9340685	7633836	7604592	4391259	6369473	8848795	4030619	9850178
CSHPOS	1-(1Z-alkenyl),2-acyl-glycerophosphocholines	PC 38:5e; PC 18:1e/20:4; [M+H]+	Peak height	24779390		CCCCCCCCCCCCCCCC/C=C\OC[C@H](COP(=O)([O-])OCC[N+](C)(C)C)OC(=O)CCC/C=C\C/C=C\C/C=C\C/C=C\CCCCC	FHHVIBPVBBRLOR-IYACIECVSA-N	ONLI_0211	351012	322430	541832	510222	450604	419576	325557	513406	359872	429111	288607	463251	489792	583205	404657	473717	405015	474816	471764	404179	584825	481401	500274	587268	442470	623025	421143	388415	406078	426495	445467	475113	390508	464225	342920	455729	492015	566168	420609	433122	339947
CSHPOS	Triacylglycerols	TAG 56:2; TAG 16:0-18:1-22:1;	Peak height	131755171		CCCCCCCCCCCCCCCC(=O)OC[C@@H](COC(=O)CCCCCCCCCCC/C=C\CCCCCCCC)OC(=O)CCCCCCCCC/C=C\CCCCCC	JBTULCCTZFQLPM-JSPVYFJMSA-N	ONLI_0212	644814	785974	122373	470297	1126296	1081256	573363	393631	1070516	479825	975228	5655264	2308025	160264	608108	318166	1362910	1569912	3066016	696206	3698450	445166	453811	212078	2289808	454425	1298517	1316623	2637828	338407	354338	602979	2853428	1838819	612611	285669	128348	373703	809593	113931	3043202
CSHPOS	Phosphatidylcholines	PC40:4	Peak height	53479183	C00157	CCCCCCCC/C=C\CCCCCCCCCCCC(=O)OC[C@H](COP(=O)([O-])OCC[N+](C)(C)C)OC(=O)CCCCCCC/C=C\C/C=C\C/C=C\CC	FHUAYOMRHXZKHT-JUGJLYODSA-N	ONLI_0213	719882	796687	782646	960647	1056011	921155	972124	833073	717450	650431	923481	1001807	995184	1004713	1150187	651037	1048100	1192425	1027541	778896	1631283	834630	780300	697888	654871	854914	682530	1059612	1096213	894451	1045972	876279	1060894	1352052	1147777	1035387	889314	832883	629062	1084243	1072874
CSHPOS	1-(1Z-alkenyl),2-acylglycerophosphoethanolamines	PE 40:7e; PE 18:1e/22:6;	Peak height	42607458		CCCCCCCCCCCCCCCC/C=C\OC[C@H](COP(=O)(O)OCCN)OC(=O)CC/C=C\C/C=C\C/C=C\C/C=C\C/C=C\C/C=C\CC	FIJFPUAJUDAZEY-MNDXXDKYSA-N	ONLI_0214	712626	660205	724011	622369	850453	722776	652295	700254	560291	613403	590668	733824	760509	666111	697144	706498	702414	955505	790253	674170	862688	726933	831892	874591	732240	925003	741816	673318	841297	612052	711709	735714	760928	763619	719591	709237	809220	885642	1037954	646736	631114
CSHPOS	Phosphosphingolipids	SMd40:1	Peak height	44260125		CCCCCCCCCCCCCCCCCCCCCC(=O)N[C@@H](COP(=O)([O-])OCC[N+](C)(C)C)[C@@H](/C=C/CCCCCCCCCCCCC)O	FJJANLYCZUNFSE-TWKUQIQBSA-N	ONLI_0215	5837416	4415729	1846263	1996092	4053754	4687082	6481362	2390451	1334555	1867773	4712198	3924694	4305714	2452524	1943773	1664964	4391558	6084860	4153675	5212096	6112699	1936293	2054870	2201837	1825889	2014488	5937671	4652206	6155909	2011078	2447277	1751704	5678308	3990752	6651785	1811975	2097362	2033353	6047064	2259764	4683070
CSHPOS	Triacylglycerols	TAG 50:4; TAG 14:0-16:0-20:4;	Peak height	131753284		CCCCCCCCCCCCCCCC(=O)O[C@@H](COC(=O)CCCCCCCCCCCCC)COC(=O)CCC/C=C\C/C=C\C/C=C\C/C=C\CCCCC	FKJNKIIHHYXTFQ-SUNRTHERSA-N	ONLI_0217	2342915	2714200	978831	2694824	5275732	4247354	1583353	1957006	2494938	2896464	3984644	5962281	5011328	1285642	2595747	839114	5440121	6612115	6736409	2479729	7305344	2257124	1909686	1302254	2518962	2307785	4718841	5123836	8792157	4168025	3913904	1840033	5524882	4022689	3052635	1911006	936874	1454697	1948820	1129662	4009259
CSHPOS	Phosphocholines	SMd40:2 A	Peak height	52931202		CCCCCCCCCCC/C=C/[C@H]([C@H](COP(=O)(O)OCC[N+](C)(C)C)NC(=O)CCCCCCCCCCCCC/C=C\CCCCCCCC)O	FOULCGVQZYQEQM-DNXGLLHMSA-O	ONLI_0218	1721934	1587380	555587	633359	1591480	2078454	2039744	760956	434899	555032	1945885	1841768	1710025	770423	874703	597513	1841759	2526058	2113196	1656787	3001198	685542	592219	691057	579540	815666	1908836	2050344	3074421	733669	776974	677944	2295012	2167539	2794658	535642	678551	710223	2375745	686298	2310227
CSHPOS	Phosphatidylcholines	PC 36:4; PC 18:2-18:2;	Peak height	5288075	C00157	CCCCC/C=C\C/C=C\CCCCCCCC(=O)OC[C@H](COP(=O)([O-])OCC[N+](C)(C)C)OC(=O)CCCCCCC/C=C\C/C=C\CCCCC	FVXDQWZBHIXIEJ-LNDKUQBDSA-N	ONLI_0220	53087848	60745584	21649898	32723964	84113424	50535808	43116492	34429520	62913516	45489468	39325140	82911904	110638256	22364430	58975572	63594992	73292344	82417168	100037888	105700192	118900048	57457096	46550512	32214926	69494920	26620120	118858728	105520384	124603312	52152736	45327064	68911648	123121904	103247096	49704248	31837010	32683384	45507940	129826592	23913018	105531160
CSHPOS	1,2-diacylglycerols	DAG 34:2; DAG 16:1-18:1;	Peak height	9543694	C00165	CCCCCCCC/C=C\CCCCCCCC(=O)O[C@@H](CO)COC(=O)CCCCCCC/C=C\CCCCCC	FWWLDEIJAPIBES-DATDAJMQSA-N	ONLI_0221	964325	1005863	538482	811806	1362459	1338246	928906	666078	696145	863917	1188429	1280271	1105036	706478	1205840	638058	1283411	1427646	1359078	1410050	1472961	680894	790771	756901	836890	838008	1561642	1280095	1647066	981119	1089098	801994	1666830	944983	709997	1032814	516046	688405	811146	399346	1289992
CSHPOS	Cholesteryl esters	CE (18:3)	Peak height	131801659	C02530	CC/C=C\C/C=C\C/C=C\CCCCCCCC(=O)O[C@H]1CC[C@@]2(C3CC[C@]4(C(C3CC=C2C1)CCC4[C@H](C)CCCC(C)C)C)C	FYMCIBHUFSIWCE-KNWYFNKZSA-N	ONLI_0222	731807	802934	464750	578354	687272	1551507	952348	870407	793806	541562	1091521	2222568	1776971	626220	921497	425983	961554	1618224	1266899	1253696	2320247	807685	761160	717757	1795032	1071334	1122368	806642	1436162	626710	711207	704697	1388323	1023097	1221734	657407	666661	837603	681059	476866	1517748
CSHPOS	Triacylglycerols	TAG 49:4; TAG 15:2-16:0-18:2;	Peak height	NA		0	0	ONLI_0223	211434	105151	0	37136	99011	33076	28121	0	0	30897	51595	95786	47104	0	38619	0	152678	263399	228875	218008	118045	0	0	0	51720	0	348691	45071	215750	41375	37398	0	295692	55781	33694	0	0	0	0	0	69002
CSHPOS	Phosphatidylcholines	PC16:0/9:0COOH	Peak height	46907870		CCCCCCCCCCCCCCCC(=O)OC[C@H](COP(=O)([O-])OCC[N+](C)(C)C)OC(=O)CCCCCCCC(=O)O	GHQQYDSARXURNG-SSEXGKCCSA-N	ONLI_0224	12077	50132	14911	50778	60456	28455	14148	15215	13374	0	15725	30871	40990	35122	52245	19533	16911	77528	16926	12634	30087	8178	31522	14533	9994	39267	54327	31632	56287	40934	38529	10320	11728	111465	69153	43706	50598	70138	94263	65893	86129
CSHPOS	Phosphatidylethanolamines	PE 36:3; PE 18:1-18:2;	Peak height	9546753	C00350	CCCCCCCC/C=C\CCCCCCCC(=O)OC[C@H](COP(=O)(O)OCCN)OC(=O)CCCCCCC/C=C\C/C=C\CCCCC	GKAFCSRKMWFPSJ-RJXNKANHSA-N	ONLI_0225	715387	587398	176609	291338	769994	589116	435990	218725	277516	358524	354066	816567	683722	198671	353169	276986	718745	850654	704287	814708	1039196	375350	336229	228183	286628	264314	920496	652818	1050780	288269	312108	338876	1078046	711484	415102	291624	178164	214048	682458	117958	749534
CSHPOS	Triacylglycerols	TAG 50:5; TAG 14:0-18:2-18:3;	Peak height	131753671		CCCCCCCCCCCCCC(=O)OC[C@@H](COC(=O)CCCCCCC/C=C\C/C=C\C/C=C\CC)OC(=O)CCCCCCC/C=C\C/C=C\CCCCC	BVZCCLFFAYZNFZ-QLFKCXFRSA-N	ONLI_0226	245734	329070	86044	234153	627078	399999	305780	170185	289946	355606	378878	600955	495815	108620	306764	152784	672714	868911	934650	385986	680094	272029	261010	170500	361870	312066	769848	634334	1227814	656667	384990	315486	647774	400185	305223	245907	123923	178472	298378	56523	510666
CSHPOS	1-acyl-sn-glycero-3-phosphocholines	LPC 20:4	Peak height	53480469		CC/C=C\C/C=C\C/C=C\C/C=C\CCCCCCC(=O)OC[C@H](COP(=O)([O-])OCC[N+](C)(C)C)O	GOMVPVRDBLLHQC-VEJNOCSESA-N	ONLI_0227	47303504	37673296	81485976	103721920	62205408	75199168	45806604	113119152	46066580	76084552	63186532	63474176	79674296	97586200	78678896	57500352	70092952	56786964	64196420	54443808	92614744	86515912	90640960	76735696	79547112	80070024	36674204	75861392	51991960	85490832	95256736	90353256	62356060	74855616	60867748	84947680	92885664	91335552	51542408	110666048	52500280
CSHPOS	Phosphatidylcholines	PC32:2	Peak height	24778764	C00157	CCCCCC/C=C\CCCCCCCC(=O)OC[C@H](COP(=O)([O-])OCC[N+](C)(C)C)OC(=O)CCCCCCC/C=C\CCCCCC	GPWHCUUIQMGELX-VHQDNGOZSA-N	ONLI_0228	1464064	1843133	868990	1572035	2614592	2949072	1603362	1477857	1014967	1348163	2474455	2821367	2716880	1307556	1851829	1050422	2563222	3014648	2305769	2099454	4146176	1490826	1312266	910895	1139201	1188347	1813305	3054601	4037756	1873621	1488328	1425535	2570650	2253290	2563101	1078923	1054721	1272376	1657574	1178832	2637712
CSHPOS	1-(1Z-alkenyl),2-acyl-glycerophosphocholines	PCo-38:4 A	Peak height	53480815		CCCCCCCC/C=C\CCCCCC/C=C\OC[C@H](COP(=O)([O-])OCC[N+](C)(C)C)OC(=O)CCCCCCCCC/C=C\C/C=C\CCCCC	GWBOVQHRCURSPU-QMFAPAEZSA-N	ONLI_0229	817082	1091845	1077432	909182	1144467	1078190	1079410	1057177	824657	888678	813085	1099529	1035045	1073196	964298	935845	922165	1300794	1284083	1031259	1156856	958405	1112702	1197577	1019270	1221492	1085934	1054274	1184778	940670	1056533	1204160	1094834	1057792	1177900	980333	1218639	1160176	1304186	1123085	949685
CSHPOS	1-acyl-sn-glycero-3-phosphocholines	LPC 22:4	Peak height	52924039		CCCCC/C=C\C/C=C\C/C=C\C/C=C\CCCCCC(=O)OC[C@H](COP(=O)([O-])OCC[N+](C)(C)C)O	ZOJBSSVHFSBHMP-JJJSWPRASA-N	ONLI_0230	251764	248861	327416	375455	429678	380954	360440	413561	154573	302438	389730	412119	459807	468935	505831	212974	376285	512335	473101	348457	597260	375436	293955	259570	319491	294296	222691	401320	420977	333593	421479	313502	387263	390094	313411	319594	314925	283593	214797	421862	405656
CSHPOS	Phosphatidylethanolamines	PE34:2	Peak height	9546747	C00350	CCCCCCCCCCCCCCCC(=O)OC[C@H](COP(=O)(O)OCCN)OC(=O)CCCCCCC/C=C\C/C=C\CCCCC	HBZNVZIRJWODIB-NHCUFCNUSA-N	ONLI_0231	966970	1051522	303412	457387	1536463	661300	827774	373409	535533	493991	708967	1599871	1205302	303401	742162	486519	1559881	1757407	1780622	1879577	1897262	673803	654048	360273	630784	554572	1910496	1204928	2336720	462282	680132	570046	1859493	1522135	859171	552005	340366	361693	1278921	244732	1756606
CSHPOS	Triacylglycerols	TAG 52:6; TAG 16:0-16:1-20:5;	Peak height	131755156		CCCCCCCCCCCCCCCC(=O)OC[C@@H](COC(=O)CCC/C=C\C/C=C\C/C=C\C/C=C\C/C=C\CC)OC(=O)CCCCCCC/C=C\CCCCCC	CCDSJNBGVOSHIH-OFLVPTCNSA-N	ONLI_0232	1443382	1141952	476648	1487973	2754780	1950120	725800	952838	1302625	1370246	1897032	2722505	2753390	527477	1370285	471759	3208218	3936026	3433240	1625328	2849446	1261270	1235746	731117	1327064	1688324	3229842	2879048	4987982	2518260	2299390	1147123	3385740	1653303	1611448	1099147	601390	679860	1393994	527036	1585125
CSHPOS	Triacylglycerols	TAG 58:10; TAG 18:2-18:2-22:6;	Peak height	131750599		CCCCC/C=C\C/C=C\CCCCCCCC(=O)OC[C@@H](COC(=O)CC/C=C\C/C=C\C/C=C\C/C=C\C/C=C\C/C=C\CC)OC(=O)CCCCCCC/C=C\C/C=C\CCCCC	YNVHIDISXOPRLL-VOUXIQFDSA-N	ONLI_0233	5251602	1984522	2237897	2763760	3349332	2388297	1963884	3476312	1815356	2510686	1672199	2105922	3020540	2472707	1975392	2122106	4218131	2854690	3312115	3647184	1982993	5119713	4703042	4024776	4498884	3204106	3536273	2585306	2464054	4577282	3565964	2445817	4830820	1610420	2036135	4515655	2697767	2131460	3313660	1850946	1689408
CSHPOS	Fatty acid esters	AC 18:1	Peak height	53477830		CCCCCC/C=C/CCCCCCCCCC(=O)O[C@@H](CCC(=O)[O-])[N+](C)(C)C	HITOYGLMAFIRNI-YSESTWPTSA-N	ONLI_0234	1179642	635569	1969948	1817166	1530332	886525	1194856	1615944	348284	649005	1077157	938474	799345	1162804	524218	278996	818331	1039817	713605	1345198	879254	850113	1454620	1821146	975968	1846870	548156	929828	807603	887447	763160	433352	699735	687208	1844896	1664146	1735716	866527	527526	1532803	516068
CSHPOS	Triacylglycerols	TAG 56:4; TAG 18:1-18:2-20:1;	Peak height	131750415	C00422	CCCCCCCC/C=C\CCCCCCCCCC(=O)OC[C@H](COC(=O)CCCCCCC/C=C\CCCCCCCC)OC(=O)CCCCCCC/C=C\C/C=C\CCCCC	YONCDTJKIZDSKQ-UVIGLXQBSA-N	ONLI_0235	5466060	5301684	1701795	6277784	13085732	9602921	3624119	3808670	3470584	3933964	6218915	23005680	14627863	1660464	4863717	1655251	11645231	10155869	15764822	5633290	14938681	3244322	3309897	1686340	8042822	3442405	7019520	8599277	11199387	4315425	3876800	2614986	17902004	8012396	3058333	3219521	1470723	2346191	3471356	1051239	13427340
CSHPOS	Cholesteryl esters	CE (16:1)	Peak height	13828666	C02530	CCCCCC/C=C\CCCCCCCC(=O)O[C@H]1CC[C@@]2([C@H]3CC[C@]4([C@H]([C@@H]3CC=C2C1)CC[C@@H]4[C@H](C)CCCC(C)C)C)C	HODJWNWCVNUPAQ-XDOSKZMUSA-N	ONLI_0236	117534	152407	117811	232309	226687	696355	207024	275759	262940	120251	264030	606604	293975	76550	146220	68963	257771	300288	290010	159910	904223	75923	59818	65491	240572	176165	74754	172561	365551	74662	0	51184	214109	334103	278220	76565	149242	156397	70228	71685	351603
CSHPOS	Triacylglycerols	TAG 60:11; TAG 18:1-20:4-22:6;	Peak height	131760287		CCCCCC/C=C\CCCCCCCCCC(=O)OC[C@@H](COC(=O)CC/C=C\C/C=C\C/C=C\C/C=C\C/C=C\C/C=C\CC)OC(=O)CCC/C=C\C/C=C\C/C=C\C/C=C\CCCCC	HSALVDSITWQZNS-FENZPOJDSA-N	ONLI_0237	1632014	974406	931960	1487961	1106905	1064600	902353	1858916	994409	1515486	917425	1028796	1431982	1135984	1214752	1229424	1788980	1037720	1093010	1066605	1293755	1732015	1989311	1171095	1878414	1145919	1353035	1406030	978304	1335189	1922933	1654153	1723872	1033889	1395031	1775776	1352390	1230350	1066903	1116041	677985
CSHPOS	Triacylglycerols	TAG 46:3; TAG 12:0-16:1-18:2;	Peak height	NA		0	0	ONLI_0238	49977	32919	0	33486	106334	47515	29963	0	51454	106644	51062	96716	102915	0	100114	42649	102213	122720	175608	87019	164356	32328	51724	46479	32299	28160	132063	97543	256805	53039	97632	56990	169382	95891	47758	39904	0	0	95066	0	124743
CSHPOS	Triacylglycerols	TAG 58:1; TAG 18:0-18:1-22:0;	Peak height	131755932		CCCCCCCCCCCCCCCCCCCCCC(=O)OC[C@H](COC(=O)CCCCCCCCCCCCCCCCC)OC(=O)CCCCCCCCC/C=C\CCCCCC	HTEKPEUBHXJJTE-VIQUSSKHSA-N	ONLI_0239	148600	151981	0	222045	175013	466074	80954	155760	247261	136637	599316	1561483	545598	59951	222776	50792	247344	257829	589027	140181	1048502	47929	145041	0	1282259	171158	233700	67277	327599	47507	85158	174323	506041	75710	133094	77187	0	151047	156406	37755	463467
CSHPOS	1-(1Z-alkenyl)-glycero-3-phosphocholines	LPC p-16:0	Peak height	10917802		CCCCCCCCCCCCCC/C=C\OC[C@H](COP(=O)([O-])OCC[N+](C)(C)C)O	HTZINLFNXLXRBC-CQLBIITFSA-N	ONLI_0240	222045	244947	235316	242970	267028	233408	226422	285980	195377	246036	197452	267791	276419	311388	289566	202257	253958	260591	298030	242643	340893	270346	238601	308703	280546	258385	236980	225761	257513	257297	254088	252172	284191	251386	250377	235819	273268	245272	257164	257419	276064
CSHPOS	Triacylglycerols	TAG 48:2; TAG 14:0-16:0-18:2;	Peak height	131753280		CCCCCCCCCCCCCCCC(=O)O[C@@H](COC(=O)CCCCCCCCCCCCC)COC(=O)CCCCCCC/C=C\C/C=C\CCCCC	YUIIXXZIUIOJQY-RGFFXGESSA-N	ONLI_0241	898205	1676661	347493	1421182	3776357	3087263	1612908	975882	2269194	2249749	2797742	9327684	5052254	592041	3149794	686672	3691169	7010164	9237075	1164794	14657838	880225	924844	636747	2291363	1254634	4303162	3920393	13071954	2489683	2273482	1432828	4669232	5075606	1749188	924804	503381	881129	824020	528055	11875918
CSHPOS	Cholesterols and derivatives	Cholesterol	Peak height	5997	C00187	C[C@H](CCCC(C)C)[C@H]1CC[C@@H]2[C@@]1(CC[C@H]3[C@H]2CC=C4[C@@]3(CC[C@@H](C4)O)C)C	HVYWMOMLDIMFJA-DPAQBDIFSA-N	ONLI_0243	9675906	9501287	8982540	9395226	10084383	9868778	9314252	10036265	9373165	9408313	9836100	10199917	9409974	8434237	9610710	7582974	9072998	9547776	10886308	9992136	10751643	9979944	9485102	9290088	9290047	9889370	10478499	10157982	10808966	9153205	7802013	10206528	10187073	10065227	10024369	9656499	8978485	10356838	10279625	9458829	9282739
CSHPOS	Triacylglycerols	TAG 54:2; TAG 18:0-18:1-18:1;	Peak height	42627601	C00422	CCCCCCCCCCCCCCCCCC(=O)OC[C@@H](COC(=O)CCCCCCC/C=C\CCCCCCCC)OC(=O)CCCCCCC/C=C\CCCCCCCC	RYNHWWNZNIGDAQ-WNMJAFDRSA-N	ONLI_0244	2841397	3520060	1639636	3983954	6521944	5458916	2517424	3295586	6532638	4061253	4659417	26485052	13135234	1600038	4281838	1970682	6409693	8495211	15431606	3064014	22174712	2637859	3135698	1724306	8387985	2724945	6322574	6956840	13468814	4079698	4406062	3724104	13012127	12642034	2748104	3494811	1703390	2595249	2812566	1308255	17322642
CSHPOS	Triacylglycerols	TAG 50:3; TAG 16:0-16:0-18:3;	Peak height	131750534		CCCCCCCCCCCCCCCC(=O)OC[C@@H](COC(=O)CCCCCCC/C=C\C/C=C\C/C=C\CC)OC(=O)CCCCCCCCCCCCCCC	WLFXGZDFDKIDIL-MXPUMGEASA-N	ONLI_0245	9962806	12796170	4794459	12293550	19334378	17326914	10536783	8250086	14203584	14365739	18505300	26066928	21176686	6031910	15585843	3719893	20695874	26113198	26940294	11233798	29156816	7780144	8560957	6100063	11550810	11794366	22275348	20800694	29699272	14635024	18278602	9225333	21572810	19632328	15691222	9037162	5542979	8927222	7949304	4877770	23171504
CSHPOS	Triacylglycerols	TAG 54:4; TAG 16:0-18:0-20:4;	Peak height	131750342	C00422	CCCCCCCCCCCCCCCCCC(=O)O[C@@H](COC(=O)CCCCCCCCCCCCCCC)COC(=O)CCC/C=C\C/C=C\C/C=C\C/C=C\CCCCC	IBSUTTNKAUSOHR-WPQPACDXSA-N	ONLI_0246	18793492	15623085	15581456	25300502	21762128	22422110	12036374	21706030	20091040	20152074	15938112	27533308	25064170	13870130	18702726	12514296	24255994	20853624	25009726	16578497	26931802	21005490	20488760	15630971	27160882	18558732	20953008	19204852	27335714	21385206	24431626	19912966	28337532	21514014	13689176	19761450	14706396	14477718	19670894	12692165	21602840
CSHPOS	Long-chain ceramides	Cer-NS d35:1; Cer-NS d18:1/17:0;	Peak height	44584335		CCCCCCCCCCCCCCCCC(=O)N[C@@H](CO)[C@@H](/C=C/CCCCCCCCCCCCC)O	ICWGMOFDULMCFL-QKSCFGQVSA-N	ONLI_0247	11034802	9990191	10091113	11454365	10259463	11110214	10324670	10375604	9077177	10392217	9080462	11445412	11193178	10850704	11331998	9919472	11374525	11811552	11137628	12058067	12618115	10840373	12096524	11328656	10556897	11443928	11373116	11290576	11397611	10959784	11700340	9855557	12155329	11255695	12100820	11108155	10098462	9392223	11127757	10426760	10663266
CSHPOS	Phosphatidylcholines	PC 16:0-22:6	Peak height	6441886		CCCCCCCCCCCCCCCC(=O)OC[C@H](COP(=O)([O-])OCC[N+](C)(C)C)OC(=O)CC/C=C\C/C=C\C/C=C\C/C=C\C/C=C\C/C=C\CC	IESVDEZGAHUQJU-ZLBXKVHBSA-N	ONLI_0249	334187008	300671936	313063552	308361536	439782176	449843744	357516256	301324000	204560992	210225056	397680128	463651680	405621696	326606624	310253792	164522688	430903168	514996576	418541440	325488704	570670400	267550704	329223360	314532992	211139376	349280640	323322240	467616448	458979552	317748640	412772000	257136272	477851872	460811552	564529088	318418816	328464256	366451008	355537120	330544384	366912384
CSHPOS	Triacylglycerols	TAG 48:4; TAG 12:0-18:1-18:3;	Peak height	NA		0	0	ONLI_0250	169212	103142	43808	178332	249906	166014	49801	55470	166023	234749	182132	246224	295149	40549	185707	44662	316235	350723	398264	255624	406260	109666	118719	54046	129476	159756	433981	187063	688255	180863	199355	187922	450918	219950	120665	118611	34604	44429	221175	36176	283378
CSHPOS	Phosphatidylcholines	PC40:5 A	Peak height	53479083		CCCCCCCC/C=C\CCCCCCCCCC(=O)O[C@H](COC(=O)CCCCCC/C=C\C/C=C\C/C=C\C/C=C\CC)COP(=O)([O-])OCC[N+](C)(C)C	IJTJDJOOHZVSAC-NDRUHXFFSA-N	ONLI_0251	7969198	7956369	5342841	6820816	12102412	11357971	12951280	7038262	4141844	4363952	11003606	12036276	11449165	6524306	6704392	4316503	12039341	12835714	9745664	7366604	19202638	6526812	5281538	5608583	5378922	7316917	6779820	13886607	13325310	6600378	7603724	5268292	11094566	15357763	16224634	6330831	5263602	5641704	7511874	7610373	12099017
CSHPOS	Cholesteryl esters	CE (20:4)	Peak height	6479222	C02530	CCCCC/C=C\C/C=C\C/C=C\C/C=C\CCCC(=O)O[C@H]1CC[C@@]2([C@H]3CC[C@]4([C@H]([C@@H]3CC=C2C1)CC[C@@H]4[C@H](C)CCCC(C)C)C)C	IMXSFYNMSOULQS-BEDFLICRSA-N	ONLI_0252	99191400	127175680	169380432	148463904	100011704	251786400	116579760	182474592	158007584	108033920	142801536	239087232	187179168	139213328	108885192	101179032	132517992	121509592	116267840	94329328	231026992	123602112	138031232	148150336	181617168	165436256	83781920	166330064	94813120	107913840	151794384	135336752	127802312	162589216	213540688	137698112	161249344	208803904	153060624	188860192	102230288
CSHPOS	Triacylglycerols	TAG 42:1; TAG 12:0-12:0-18:1;	Peak height	138179082	NA	CCCCCCCCCCCC(=O)OCC(COC(=O)CCCCCCCCC/C=C\CCCCCC)OC(=O)CCCCCCCCCCC	IOKBJIOMCMNTIK-VXPUYCOJSA-N	ONLI_0253	0	0	0	0	0	0	0	0	0	0	0	0	0	0	0	0	0	28842	0	0	0	0	0	0	26791	0	0	0	35661	0	0	0	31346	0	0	0	0	0	29128	0	0
CSHPOS	Triacylglycerols	TAG 50:4; TAG 14:0-18:2-18:2;	Peak height	131753663		CCCCCCCCCCCCCC(=O)OC[C@@H](COC(=O)CCCCCCC/C=C\C/C=C\CCCCC)OC(=O)CCCCCCC/C=C\C/C=C\CCCCC	UVOGHPPAYFAQIT-AVIDDATOSA-N	ONLI_0254	1762559	2473982	787188	2158761	5474505	3531620	1742531	1523748	1870784	2362373	3149111	5745644	4883984	973716	2183522	943031	4968737	6225514	7388108	2093470	6828278	2031806	1746382	1248586	2947855	2169528	4778877	5189834	8716778	4173307	2642768	1779413	5793870	3323686	2166218	1755309	871431	1322633	1853970	795922	4159782
CSHPOS	Triacylglycerols	TAG 56:6; TAG 18:0-18:2-20:4;	Peak height	131750374	C00422	CCCCCCCCCCCCCCCCCC(=O)OC[C@@H](COC(=O)CCC/C=C\C/C=C\C/C=C\C/C=C\CCCCC)OC(=O)CCCCCCC/C=C\C/C=C\CCCCC	CKEOSPBKHRUVTN-WDVRSESKSA-N	ONLI_0255	4198904	3627817	2976096	5308340	5994466	4904040	3044584	4728077	6169440	5323121	4568362	9660949	8932848	2961777	5281196	2499462	6825062	6599778	9401005	3255569	9287340	4018713	3843080	2627156	5504834	3371870	5505394	6737658	7395908	6357530	6916348	4092684	8670915	7388584	4504634	4318341	2474739	3002953	2852102	2353146	6683707
CSHPOS	Triacylglycerols	TAG 58:4; TAG 18:1-18:2-22:1;	Peak height	131760188		CCCCCCCC/C=C\CCCCCCCCCCCC(=O)OC[C@H](COC(=O)CCCCCCCCC/C=C\CCCCCC)OC(=O)CCCCCCC/C=C\C/C=C\CCCCC	ODZGUPAQUQGEKA-MJECLYFESA-N	ONLI_0256	610562	800268	50697	270642	1045310	750478	417923	225319	538576	408692	1034156	2999268	1321853	107118	543441	254399	1464815	1381373	1817738	954722	1611192	196505	287966	165092	1515413	366044	1038034	1066546	1278088	287810	259247	569994	2654628	782210	373321	209352	46282	217013	549699	47657	1663353
CSHPOS	Cholesteryl esters	CE ( 22:4)	Peak height	16061341	C02530	CCCCC/C=C\C/C=C\C/C=C\C/C=C\CCCCCC(=O)O[C@H]1CC[C@@]2([C@H]3CC[C@]4([C@H]([C@@H]3CC=C2C1)CC[C@@H]4[C@H](C)CCCC(C)C)C)C	ITGTXSFLBABXQA-BMURBKCOSA-N	ONLI_0257	52778	531881	548300	393223	431210	4499312	1058694	1669790	1401958	516939	1733194	4782433	2931326	785661	869573	427278	907038	494611	550641	644840	4034015	731139	570366	539859	2365420	1230590	564155	637905	720965	687444	1029371	711097	759197	1543394	300107	451068	1108920	2095363	1554217	863551	669514
CSHPOS	Sphingomyelins	SMd41:2 A	Peak height	52931209		CCCCCCCCCCCCCCCCCCCCCCC(=O)N[C@@H](COP(=O)([O-])OCC[N+](C)(C)C)[C@@H](/C=C/CCCCCCCC/C=C\CCC)O	JBDGKEXQKCCQFK-JWQIMADESA-N	ONLI_0258	485477	448388	364210	435779	368270	600224	354239	383675	295347	341995	539429	388898	533995	445281	481334	339401	631652	527644	466782	400701	572342	429027	348238	346068	288037	382011	371562	500377	426036	405645	520475	383136	528131	424290	477445	292695	330627	359193	557828	443026	345506
CSHPOS	Triacylglycerols	TAG 53:3; TAG 17:0-18:1-18:2;	Peak height	138183776		CCCCCCCCCCCCCCCCC(=O)OCC(COC(=O)CCCCCCCC/C=C\C=C/CCCCC)OC(=O)CCCCCCCCC/C=C\CCCCCC	JCUUGUUICZELJG-KDHVXLOFSA-N	ONLI_0259	1237820	1330612	653423	1467600	2016374	1935145	903417	1019954	2077612	1491818	1565856	5339196	3419174	640715	1540200	858124	2350280	2562449	4153202	1424461	4041180	1239846	980317	794510	3685198	1022473	2486118	2252230	3163515	1728624	1629184	1545810	4089544	2049881	864071	1078254	552777	850747	1136212	406540	2729699
CSHPOS	Triacylglycerols	TAG 60:3; TAG 18:2-20:1-22:0;	Peak height	25240389		CCCCCCCCCCCCCCCCCCCCCC(=O)OC[C@@H](COC(=O)CCCCCCC/C=C\C/C=C\CCCCC)OC(=O)CCCCCCCCC/C=C\CCCCCCCC	LEZBCWXJJZZACU-NYUYSZTLSA-N	ONLI_0260	180731	160201	0	205492	219876	434262	93865	176109	550962	232557	781362	1351657	1141857	0	271438	131782	592035	251732	548216	200227	1119912	173923	175400	115357	1378128	320594	296081	192379	370690	64244	152089	226724	880420	178072	110533	73010	0	382686	322074	0	379136
CSHPOS	Triacylglycerols	TAG 58:6; TAG 18:1-20:1-20:4;	Peak height	131750413	C00422	CCCCCCCC/C=C\CCCCCCCCCC(=O)O[C@@H](COC(=O)CCCCCCC/C=C\CCCCCCCC)COC(=O)CCC/C=C\C/C=C\C/C=C\C/C=C\CCCCC	GSNFRUMSEHHPSY-ZGZATPIUSA-N	ONLI_0261	493917	539335	312909	567407	1033790	1090791	428212	537050	763731	596948	597231	2943512	1720465	301335	587730	293830	1204498	925874	1170227	498220	1896892	573015	501029	283328	1660370	351903	735667	983073	952699	720772	658601	572832	1383650	1014604	612374	472899	232937	404563	305797	222456	1148827
CSHPOS	Triacylglycerols	TAG 55:3; TAG 15:0-19:0-21:3;	Peak height	NA		0	0	ONLI_0262	524530	388516	176494	484288	596930	459078	288921	267113	265187	358259	569491	819589	743883	175740	517370	122615	949967	871448	1126657	451775	817522	307176	308001	150552	393326	286311	589823	498684	1055341	308902	398243	275716	1323645	520368	216942	299522	60205	203648	308594	62052	654335
CSHPOS	Phosphatidylcholines	PC34:2	Peak height	5287971	C00157	CCCCCCCCCCCCCCCC(=O)OC[C@H](COP(=O)([O-])OCC[N+](C)(C)C)OC(=O)CCCCCCC/C=C\C/C=C\CCCCC	JLPULHDHAOZNQI-ZTIMHPMXSA-N	ONLI_0263	1248267776	1324320512	809992960	945402752	1546078464	1316891136	1241381632	938951424	1022242368	950798720	1193557120	1708166272	1606588800	829416320	1397348608	1020172032	1401471744	1793959680	1839284480	1601530368	2006335872	1196433792	1162819584	999921408	1116954624	1041053248	1719045248	1683119616	2001956096	1061151936	1350647552	1261704064	1843154944	1633174656	1449104128	1005584128	997213760	1135851008	1691401856	825876288	1688300416
CSHPOS	Triacylglycerols	TAG 60:12; TAG 18:2-20:4-22:6;	Peak height	131763347		CCCCC/C=C\C/C=C\CCCCCCCC(=O)OC[C@@H](COC(=O)CC/C=C\C/C=C\C/C=C\C/C=C\C/C=C\C/C=C\CC)OC(=O)CCC/C=C\C/C=C\C/C=C\C/C=C\CCCCC	LVEQOBLTSBRKGQ-WVQHRUTQSA-N	ONLI_0264	4196027	1526770	2421162	2803071	1509354	2010504	1144734	3279680	1767532	2114386	1626971	978659	1613715	1810911	1461331	1486350	3037332	1479288	1138376	2466737	1277036	3672820	4538038	2508660	2328960	2581209	2746478	2031549	1416150	1852424	4076396	2092226	2824428	947196	2682425	3559055	2358734	2151841	2650799	2030132	435261
CSHPOS	1-acyl-sn-glycero-3-phosphoethanolamines	LPE20:4	Peak height	42607465		CCCCC/C=C\C/C=C\C/C=C\C/C=C\CCCC(=O)OC[C@H](COP(=O)(O)OCCN)O	ROPRRXYVXLDXQO-XSQXPFHXSA-N	ONLI_0265	819356	632290	674588	896910	1137149	1162564	1050257	1589331	543861	970247	1128053	1001544	1179186	1158860	2063196	678636	1368352	1964247	1006389	945799	2070645	1177502	956721	958311	934255	1106778	1006474	930025	936591	1217198	1529106	1059241	1014453	771385	645812	817389	813957	1195127	522580	1810954	1337760
CSHPOS	Triacylglycerols	TAG 49:3; TAG 15:0-16:1-18:2;	Peak height	131754333		CCCCCCCCCCCCCCC(=O)OC[C@@H](COC(=O)CCCCCCC/C=C\C/C=C\CCCCC)OC(=O)CCCCCCC/C=C\CCCCCC	CQSXCZMDDSQLAG-RLFYQNGLSA-N	ONLI_0266	197692	192380	41118	150455	423011	246959	156192	66190	139134	175617	214618	482927	377044	50819	206273	125297	425596	555599	857155	248318	410584	53156	73262	50057	230865	138264	515016	389666	738984	255680	221285	143149	588330	251988	147335	72804	0	46644	154771	33791	465580
CSHPOS	Triacylglycerols	TAG 48:0; TAG 14:0-16:0-18:0;	Peak height	131753268		CCCCCCCCCCCCCCCCCC(=O)OC[C@H](COC(=O)CCCCCCCCCCCCC)OC(=O)CCCCCCCCCCCCCCC	JTDPHURHZMZJHD-DYVQZXGMSA-N	ONLI_0267	1309452	2097860	1459521	2247347	2380751	2385744	1468496	2180894	3625310	2259246	2066652	5099181	3958312	3008504	3341754	1676099	2182092	2679940	5501496	1591775	5151462	1930745	1569097	1624533	5440734	2484887	2577881	2180340	4996605	2159639	5782557	3159282	4173200	2817086	883792	2722526	2429370	3837355	3172494	2728199	6092138
CSHPOS	Triacylglycerols	TAG 58:2; TAG 18:0-18:2-22:0;	Peak height	131756084		CCCCCCCCCCCCCCCCCCCCCC(=O)OC[C@H](COC(=O)CCCCCCCCCCCCCCCCC)OC(=O)CCCCCCC/C=C\C/C=C\CCCCC	VTHDNMHRPKXWMZ-WMMWWMJFSA-N	ONLI_0268	233214	254701	49612	268878	282425	738321	277708	297552	598897	257410	884698	2264379	1479789	45171	374327	173843	690251	336145	627106	190593	1789906	153295	192107	56525	1920881	416510	389652	318069	590855	138747	187512	327525	1154089	281786	110798	133531	0	519058	579951	36778	572204
CSHPOS	Triacylglycerols	TAG 46:0; TAG 14:0-16:0-16:0;	Peak height	91867460		CCCCCCCCCCCCCCCC(=O)OC[C@H](COC(=O)CCCCCCCCCCCCC)OC(=O)CCCCCCCCCCCCCCC	JWVXCFSNEOMSHH-DXQCBLCSSA-N	ONLI_0269	261299	380598	228847	357425	503233	524139	341710	336793	469255	422235	435240	785544	531717	369644	643288	291417	493378	616639	865445	314021	1016624	326626	284103	345138	947944	423909	625582	451005	1082068	417324	676778	564775	649374	429344	158170	410198	447421	827270	517505	347662	946067
CSHPOS	Triacylglycerols	TAG 50:2; TAG 16:0-16:0-18:2;	Peak height	25240356	C00422	CCCCCCCCCCCCCCCC(=O)OC[C@H](COC(=O)CCCCCCC/C=C\C/C=C\CCCCC)OC(=O)CCCCCCCCCCCCCCC	MTWYSKGJIDFSRC-IICCMCGVSA-N	ONLI_0270	18118104	27480116	8948053	31399380	55169188	52774192	27171836	21693314	59412080	37705584	44715028	149207136	94594648	11756536	47971232	18226840	58996448	86130720	135041216	26845690	173372896	22476004	20236336	16518620	69808048	28798020	64020572	59693100	149626992	40529104	41085404	43728044	95610744	87397952	29871210	23356358	11558715	25124726	30621392	8295422	152715472
CSHPOS	Ceramides	Cer d40:1	Peak height	5283570	C00195	CCCCCCCCCCCCCCCCCCCCCCCCCC(=O)N[C@@H](CO)[C@@H](/C=C/CCCCCCCCCCCCC)O	CJROVRTUSFQVMR-GVOPMEMSSA-N	ONLI_0271	407390	329915	124448	185362	428612	446990	670649	206696	149051	161574	452116	546023	436944	113747	229646	116102	423152	675087	500211	448271	699962	182576	179043	161753	184754	167212	531455	598913	794313	155234	274767	210574	624847	574091	885673	207486	207520	208268	335293	139022	641262
CSHPOS	1-alkyl,2-acylglycero-3-phosphocholines	PCp-32:0 or PC o-32:1	Peak height	52923742		CCCCCCCCCCCCCCCCOC[C@H](COP(=O)([O-])OCC[N+](C)(C)C)OC(=O)CCCCCCC/C=C\CCCCCC	HJVQHTGUAIETCQ-VEAYGOGPSA-N	ONLI_0272	353537	428959	432632	336160	484386	340123	307321	336794	304902	356623	389829	469211	391906	339072	374667	366107	414978	561000	415894	510483	471480	416977	373467	440963	418980	453681	480871	438785	502539	326992	332954	383933	450059	377685	423597	327103	363160	385265	567931	324459	361683
CSHPOS	Triacylglycerols	TAG 58:0; TAG 18:0-18:0-22:0;	Peak height	131755786		CCCCCCCCCCCCCCCCCCCCCC(=O)OC[C@H](COC(=O)CCCCCCCCCCCCCCCCC)OC(=O)CCCCCCCCCCCCCCCCC	KFFURWDSOSXFNL-XKJQNMSGSA-N	ONLI_0273	49509	41073	44714	47037	37215	155668	36639	43380	131534	64381	158107	692710	65208	0	62589	37426	53940	88259	57417	41568	168720	42718	52437	0	652551	58751	42939	0	57631	0	88129	50465	60841	0	103298	46422	51593	56054	41523	45878	59965
CSHPOS	1-alkyl,2-acylglycerophosphoethanolamines	PE 38:7e; PE 16:1e/22:6; [M+H]+	Peak height	138193153		CCCCCC/C=C\CCCCCCCCOCC(COP(=O)(O)OCCN)OC(=O)CC/C=C\C/C=C\C/C=C\C/C=C\C/C=C\C/C=C\CC	KGCPGAKRLOCUEV-ZLXBYIIJSA-N	ONLI_0274	915355	948797	749238	656329	1027980	1001999	883929	689495	566345	563605	752335	1050048	942881	633247	632200	629992	921338	1316998	1051908	1088425	1371752	748317	704220	775272	692662	822929	1148388	1004663	1369205	632318	752351	770701	1103422	1144106	967555	679109	767113	844064	1310102	580092	942771
CSHPOS	Phosphatidylcholines	PC16:0/16:0	Peak height	452110	D03585	CCCCCCCCCCCCCCCC(=O)OC[C@H](COP(=O)([O-])OCC[N+](C)(C)C)OC(=O)CCCCCCCCCCCCCCC	KILNVBDSWZSGLL-KXQOOQHDSA-N	ONLI_0275	2164974	2131955	3205326	2934146	3645684	3445853	1922739	2908912	2202144	1831801	2792897	3215970	3675342	2398076	2929608	1347639	3370152	3838038	3488534	2749030	5188396	2711134	3440228	2628438	1871569	3195417	2643010	4119318	4233268	2328012	5763280	1973056	4142268	3839288	4869748	2527386	2713792	3176598	3339010	3206822	2196812
CSHPOS	Phosphatidylcholines	PC 36:5; PC 16:0-20:5;	Peak height	5313224		CCCCCCCCCCCCCCCC(=O)OCC(COP(=O)(O)OCC[N+](C)(C)C)OC(=O)CCC/C=C/C/C=C/C/C=C/C/C=C/C/C=C/CC	KLTHQSWIRFFBRI-RWSHWRRPSA-O	ONLI_0276	5076898	5176668	2692240	3898220	7971785	7887420	8684766	5258124	4056169	3453074	8586032	13889508	9288147	5106168	9095049	2829162	8529519	15588548	14940180	6497110	17070752	5010606	5186400	3812998	4046337	6651319	7482788	9633240	16318840	7007413	9089264	5132602	10996683	14213499	11013788	6040900	5587818	5981988	4829447	4810546	15751262
CSHPOS	Phosphatidylcholines	PC38:3	Peak height	53478919	C00157	CCCCCC/C=C\CCCCCCCCCC(=O)O[C@H](COC(=O)CCCCCCCCC/C=C\C/C=C\CCCCC)COP(=O)([O-])OCC[N+](C)(C)C	KNNHXKQRTYEWCA-HYYWERRFSA-N	ONLI_0277	17421810	18675644	17212974	20669640	28891346	23501796	24846310	20838686	12444768	13504199	25112412	34563852	28264420	19272428	21260930	11788826	26625060	32170768	26992028	17883102	68564888	18356256	17783222	15630901	15149751	19523818	18748032	36704448	35995652	22181470	26860502	18540972	28104092	57613912	35471976	17493084	19880144	21905800	18478664	24918154	30351472
CSHPOS	Triacylglycerols	TAG 58:5; TAG 18:1-18:2-22:2;	Peak height	131760195		CCCCCC/C=C\CCCCCCCCCC(=O)OC[C@@H](COC(=O)CCCCCCCCCCC/C=C\C/C=C\CCCCC)OC(=O)CCCCCCC/C=C\C/C=C\CCCCC	NRIOEETWLZWDRL-NUDAZDJUSA-N	ONLI_0278	590366	505127	53279	279615	998351	719484	337638	233234	281260	249504	680042	2232796	1243088	104169	436050	144897	1355880	1107540	1420518	756308	1252922	214811	221042	147559	696114	265792	923998	859574	1151711	239541	236029	235521	2149371	546159	203274	196209	62094	209252	458482	45679	1140525
CSHPOS	1-alkyl,2-acylglycero-3-phosphocholines	PCo-40:6	Peak height	24779341		CCCCCCCCCCCCCCCCCCOC[C@H](COP(=O)([O-])OCC[N+](C)(C)C)OC(=O)CC/C=C\C/C=C\C/C=C\C/C=C\C/C=C\C/C=C\CC	QBZALASVZLFAHF-KYPHJRDXSA-N	ONLI_0280	487548	510869	716398	483710	669927	586212	619600	656624	395468	525983	404890	612281	584380	504431	601966	496942	524643	654486	720999	549908	651452	615294	768787	806302	620854	894342	554443	587124	610232	442646	559129	635252	600353	611204	593696	617064	780057	695954	725978	535263	484167
CSHPOS	Triacylglycerols	TAG 49:1; TAG 15:0-16:0-18:1;	Peak height	131754160		CCCCCCCCCCCCCCCC(=O)O[C@@H](COC(=O)CCCCCCCCCCCCCC)COC(=O)CCCCCCCCC/C=C\CCCCCC	KWXJMBTWCDOOOM-FMXLGRSFSA-N	ONLI_0281	321618	289368	146359	341983	475871	532063	237703	227043	685181	400118	570715	1438518	825676	169396	488946	158781	542500	639068	1218808	268742	1391716	201061	231120	163672	840114	242519	574385	380476	802344	362176	296696	302329	895770	475837	203656	220382	137753	190544	212169	140483	843429
CSHPOS	Phosphatidylcholines	PC38:2	Peak height	24779263	C00157	CCCCCCCCCCCCCCCCCCCC(=O)OC[C@H](COP(=O)([O-])OCC[N+](C)(C)C)OC(=O)CCCCCCC/C=C\C/C=C\CCCCC	KXXLFCAPKGRXBT-FMJYHZMHSA-N	ONLI_0282	6932042	6560595	1329246	2004066	7276017	5045284	8392760	1550870	1457912	1673608	4837712	7834414	6262464	1488997	2325802	1544786	7797958	9456890	8373320	8964319	9781935	2063555	1805188	1282463	1968220	1522634	7837015	9490318	10103126	2329442	2274960	1782304	10165948	7800757	7182278	1396688	1425778	1483146	5412908	1865425	8658510
CSHPOS	Phosphosphingolipids	SMd32:1	Peak height	11433862		CCCCCCCCCCCCC/C=C/[C@H]([C@H](COP(=O)([O-])OCC[N+](C)(C)C)NC(=O)CCCCCCCCCCCCC)O	KYICBZWZQPCUMO-PSALXKTOSA-N	ONLI_0283	241955	251576	372352	381422	354280	346587	266345	447058	338836	300423	297498	262523	326637	445329	362714	316918	342210	338151	334194	228810	411430	350512	315120	383371	320005	425319	267447	360223	330892	378226	404516	321777	283251	323852	335204	319913	435983	469422	338896	396092	320528
CSHPOS	Triacylglycerols	TAG 58:4; TAG 18:2-18:2-22:0;	Peak height	25240386		CCCCCCCCCCCCCCCCCCCCCC(=O)OC[C@@H](COC(=O)CCCCCCC/C=C\C/C=C\CCCCC)OC(=O)CCCCCCC/C=C\C/C=C\CCCCC	OEWUGNNMLZAOCV-HESLGCGWSA-N	ONLI_0284	734009	700892	117121	299141	1092643	731289	329688	197306	408198	427921	965950	1914517	1120747	110870	639454	229727	1586261	1418651	1463495	900191	1373626	231736	325529	172434	611890	420016	1122099	985549	1370244	280381	448608	557837	2154590	745607	311383	215796	51882	148040	673423	52211	1210984
CSHPOS	1-acyl-sn-glycero-3-phosphocholines	LPC 16:1	Peak height	24779461		CCCCCC/C=C\CCCCCCCC(=O)OC[C@H](COP(=O)([O-])OCC[N+](C)(C)C)O	LFUDDCMNKWEORN-ZXEGGCGDSA-N	ONLI_0285	3665581	4434152	2899592	4857237	6974456	8574825	4855916	4684962	2515341	3708960	7677614	8099103	6393194	4024417	5978863	2393944	6374680	9644185	7398226	4972506	12835201	3617518	3371873	3064498	3249958	4119410	3276980	6429230	9570733	4223352	4097916	3279242	5975354	7399849	7015420	2836454	3814578	3895772	3688192	4327089	8908912
CSHPOS	Ceramides	Cer-NS d37:4; Cer-NS d22:3/15:1;	Peak height	NA		0	0	ONLI_0286	17807382	14602109	17512156	17802400	15243282	17624836	11753775	16651091	15919250	17359616	15397662	17004066	15371425	15721963	17112434	10993667	16981846	17850870	17420792	17084510	17690158	16257632	17847438	14681721	13434688	16267285	16400733	16024548	17557322	15808306	23772408	13924457	17120900	16174973	17371964	16191112	13337421	14122246	14890052	15703487	13514131
CSHPOS	Phosphosphingolipids	N-Octadecanoylsphing-4-enine-1-phosphocholine	Peak height	6453725		CCCCCCCCCCCCCCCCCC(=O)N[C@@H](COP(=O)([O-])OCC[N+](C)(C)C)[C@@H](/C=C/CCCCCCCCCCCCC)O	LKQLRGMMMAHREN-YJFXYUILSA-N	ONLI_0287	290845	275119	999786	821504	407178	410786	240280	891673	624138	555968	335323	383305	344792	883178	784524	295263	414433	492818	451520	430356	585843	593359	1035000	945509	434444	1420481	347507	516314	476907	593760	936060	558518	516620	362998	601666	877349	986548	1332990	537238	974354	212984
CSHPOS	Phosphosphingolipids	SMd36:1	Peak height	5283588	C00550	CCCCCCCCCCCCCCCCCC(=O)N[C@@H](COP(=O)(O)OCC[N+](C)(C)C)[C@@H](/C=C/CCCCCCCCCCCCC)O	LKQLRGMMMAHREN-YJFXYUILSA-O	ONLI_0288	865297	920554	2896001	2038013	1198773	1119356	1109222	2203482	1707714	1489712	1036958	1026005	1125188	2671802	2077418	1781561	1051975	1463338	1243539	1277534	1505971	1742966	2766428	3213068	1923094	3515045	1068394	1465200	1444299	1811640	2386170	1879341	1279130	963313	1637781	2670062	3259218	3646505	1663678	2595410	932603
CSHPOS	1-acyl-sn-glycero-3-phosphocholines	LPC 17:1	Peak height	24779451		CCCCCCC/C=C\CCCCCCCC(=O)OC[C@H](COP(=O)([O-])OCC[N+](C)(C)C)O	LPMGFNAQZPADDZ-FJIRUFBNSA-N	ONLI_0289	559941	538700	337921	546238	693464	645914	584812	539154	320967	436014	540440	733714	654629	448866	599215	293692	655212	808156	704554	634388	914958	428294	302821	266792	353729	320993	459667	644909	738929	527644	393149	387508	734275	645519	574788	372277	296549	303765	359432	414286	676627
CSHPOS	Phosphosphingolipids	SMd33:1	Peak height	52931139		CCCCCCCCCCCCCCC(=O)N[C@@H](COP(=O)([O-])OCC[N+](C)(C)C)[C@@H](/C=C/CCCCCCCCCCCCC)O	LQINJRUGTUOHGS-YPDYIYJKSA-N	ONLI_0290	903367	900114	1485459	1477482	1133392	1189769	843070	1351239	1272942	1118008	1063050	1090609	1114238	1628934	1540207	1320416	972862	1140988	1251302	970255	1624557	1505900	1445821	1470174	1316394	1752441	986411	1256912	1098915	1563156	1343893	1264448	1147680	1100195	967301	1081249	1352205	1449061	1479528	1294617	1072376
CSHPOS	1-acyl-sn-glycero-3-phosphocholines	LPC 22:6	Peak height	10415542		CC/C=C\C/C=C\C/C=C\C/C=C\C/C=C\C/C=C\CCC(=O)OC[C@H](COP(=O)([O-])OCC[N+](C)(C)C)O	LSOWKZULVQWMLY-APPDJCNMSA-N	ONLI_0291	21504060	17539940	33408644	34446816	29112166	31618918	22781378	37931492	12137948	24365360	25523494	28746858	34169280	39453380	35981336	17015632	32865616	32088666	29137454	23349448	41169216	33574608	33388918	31641244	29084624	31197912	18024574	34306608	28834116	32454678	40909232	30880806	29442636	31995956	28616430	34750592	34896888	33456920	20361108	39121332	27459002
CSHPOS	Triacylglycerols	TAG 52:3; TAG 16:1-18:1-18:1;	Peak height	102240596	C00422	CCCCCCCC/C=C\CCCCCCCC(=O)OC[C@H](COC(=O)CCCCCCC/C=C\CCCCCC)OC(=O)CCCCCCC/C=C\CCCCCCCC	YBWITEZBUYUNFC-JZBMGIQCSA-N	ONLI_0292	136774096	154041312	66356984	179759712	289275520	212576272	130631256	135803408	278080736	198775568	190618432	455793024	447012032	76523856	197878320	98091392	276569088	298859712	489876192	140227232	442510368	140858016	126782616	108941112	376768000	178392096	320018336	301911296	463576896	258472464	235078704	189142896	480425600	273423296	142626112	148777168	79540200	149337520	157799120	57094220	375130208
CSHPOS	Triacylglycerols	TAG 51:4; TAG 15:0-16:0-20:4;	Peak height	131750647		CCCCCCCCCCCCCCCC(=O)O[C@@H](COC(=O)CCCCCCCCCCCCCC)COC(=O)CCC/C=C\C/C=C\C/C=C\C/C=C\CCCCC	LVHOHHSODZICOO-IIKXJSSRSA-N	ONLI_0293	1126887	847868	392563	869422	1371629	888346	466922	634207	829159	900264	873928	1193255	1425375	405867	1034519	424932	1831923	1813623	2411812	1383920	1328374	792657	745990	537607	1186004	662773	1882579	1298733	2352780	1070186	1209370	821361	2444237	870857	496978	673373	238002	366987	990566	265080	1381469
CSHPOS	Triacylglycerols	TAG 56:6; TAG 16:0-18:1-22:5;	Peak height	131755185		CCCCCCCCCCCCCCCC(=O)OC[C@@H](COC(=O)CCCCC/C=C\C/C=C\C/C=C\C/C=C\C/C=C\CC)OC(=O)CCCCCCCCC/C=C\CCCCCC	LXKOOMKDVRTCPD-NMQVVHJTSA-N	ONLI_0294	7772472	7426102	5356108	9808222	13721057	10067884	6871744	8695915	11004266	9285167	9034006	23089780	21118886	5217374	10165126	5628855	13628840	14054145	20476856	6380382	20865408	7975610	7271005	5533686	13921063	6739779	11088339	14259438	16162789	12292540	12577325	9136852	19010006	15662074	8952792	8815283	5324089	6495660	5255754	4435600	15514594
CSHPOS	Sphingomyelins	SM d42:3; SM d14:1/28:2;	Peak height	NA		0	0	ONLI_0295	2819097	3234884	3539779	3770746	4073703	3589478	3223484	3474937	2528754	3055958	3460034	3531692	3863146	3487602	4276020	3273296	3937562	3860231	3834076	3469815	5707786	3874057	3064028	3479375	3251641	3624247	3060932	3676235	4320374	3356672	3253702	3328520	3816352	3561029	4523672	3142709	3401092	3214833	4739650	3645972	3317826
CSHPOS	Phosphatidylcholines	PC 40:8; PC 20:4-20:4;	Peak height	24779076	C00157	CCCCC/C=C\C/C=C\C/C=C\C/C=C\CCCC(=O)OC[C@H](COP(=O)([O-])OCC[N+](C)(C)C)OC(=O)CCC/C=C\C/C=C\C/C=C\C/C=C\CCCCC	LZLVZIFMYXDKCN-QJWFYWCHSA-N	ONLI_0296	4033453	3428214	2432399	2866024	4853918	5680198	3341099	2794283	1520854	2384532	4158050	4588928	4924662	3354182	2687058	1902190	4861490	4454028	4014178	3276858	5985792	2720032	2826945	2326332	1895085	2314265	3211142	5703014	4890642	3060108	2842310	2096680	5786727	4537876	4926276	2569844	2519236	2558095	4400919	3085516	3696798
CSHPOS	Acyl carnitines	AC 10:0	Peak height	10245190		CCCCCCCCCC(=O)OC(CC(=O)[O-])C[N+](C)(C)C	LZOSYCMHQXPBFU-UHFFFAOYSA-N	ONLI_0297	0	0	0	0	0	12580	8257	7862	6372	0	0	0	0	0	0	0	6694	0	0	0	0	0	0	0	0	0	0	0	0	0	0	0	0	0	0	0	0	0	0	10840	0
CSHPOS	Triacylglycerols	TAG 51:4; TAG 16:0-17:2-18:2;	Peak height	138208584		CCCCCCCCCCCCCCCC(=O)OCC(COC(=O)CCCCCCCC/C=C\C=C/CCCCC)OC(=O)CCCCCCCCC/C=C\C/C=C\CC	MBVRTVOCODAFTO-ZQYFXHSESA-N	ONLI_0299	1387704	1130761	444628	975901	2019215	1196256	661096	842646	906776	1060311	1350820	2019468	2375445	559544	1030637	661595	2304833	2535219	3457132	1441126	2045187	934678	831422	679821	1658243	1036376	2485004	1791538	2956512	1518597	1097771	1037977	3280905	1237808	677154	820630	347120	537586	1362657	255067	1984092
CSHPOS	Phosphatidylcholines	PC37:2	Peak height	52922735		CCCCCCCCCCCCCCCCCCC(=O)O[C@H](COC(=O)CCCCCCC/C=C\C/C=C\CCCCC)COP(=O)([O-])OCC[N+](C)(C)C	MCZUABDVGPPWPM-HJTCUGKVSA-N	ONLI_0300	9289016	11512710	3102690	4378725	11572276	9812472	9791757	4369281	4024521	3939696	8112177	9899918	12747188	3322652	6003090	5722113	12052646	13159450	12952648	16776254	14490061	6345570	4842788	4019135	4830862	4471078	13875406	15337851	14901976	5590666	5104202	5068684	17628542	13590312	11600293	3037017	3621742	4529628	17338192	3976287	12412399
CSHPOS	Triacylglycerols	TAG 52:3; TAG 16:0-18:0-18:3;	Peak height	131755026		CCCCCCCCCCCCCCCCCC(=O)O[C@@H](COC(=O)CCCCCCCCCCCCCCC)COC(=O)CCCCCCC/C=C\C/C=C\C/C=C\CC	QRLNWUKVSNTXQG-VWMLCLGZSA-N	ONLI_0301	37235800	36395576	30682506	43563964	36364684	54363164	34330764	40552996	59078204	38477212	48839692	66672648	55942324	30497744	38524276	26414950	43476832	40810892	46944940	35035488	61598236	40704636	35337164	31279504	57550808	42746468	40373236	40656864	44368520	38723764	49491740	35679940	48431892	42461968	46272452	36787488	30880998	42588056	38634156	28308392	39166972
CSHPOS	Sphingomyelins	SMd38:2	Peak height	52931179		CCCCCCCCCCCCC/C=C/[C@H]([C@H](COP(=O)([O-])OCC[N+](C)(C)C)NC(=O)CCCCCCCCC/C=C\CCCCCCCC)O	MDRFMTLYKHBJTF-NQYLGBTJSA-N	ONLI_0302	309646	243509	268883	225657	332699	418758	318953	265940	163636	207833	493432	407554	386670	261039	289098	187263	388478	457860	369199	308439	650754	219405	257271	288680	224296	361800	291970	396771	472784	215430	302976	201868	405851	421932	601048	175306	265816	294599	438114	266441	367373
CSHPOS	Phosphatidylcholines	PC35:1	Peak height	52922679		CCCCCCCCCCCCCCCCC(=O)O[C@H](COC(=O)CCCCCCC/C=C\CCCCCCCC)COP(=O)([O-])OCC[N+](C)(C)C	MFHIZGSSDZJFKD-IYEJTHTFSA-N	ONLI_0303	1537881	1718801	917103	1302392	1867552	1515115	1834541	1137764	945089	910724	1572356	2254388	1641146	1078603	1139232	741498	1881504	2597794	1933162	2028298	3026032	1004089	783533	797671	741998	902985	1418812	1929894	2572293	1275210	990801	980828	2275781	2210660	1857098	904899	688660	954465	1128758	899231	1855285
CSHPOS	Triacylglycerols	TAG 60:1; TAG 18:1-20:0-22:0;	Peak height	131757302		CCCCCCCCCCCCCCCCCCCCCC(=O)OC[C@@H](COC(=O)CCCCCCCCC/C=C\CCCCCC)OC(=O)CCCCCCCCCCCCCCCCCCC	MFTJGJJGQONILX-RXNSVRMPSA-N	ONLI_0304	57904	0	0	137164	65502	179463	0	43354	174162	54254	223398	483265	146749	0	0	0	140273	59232	194157	0	382915	42011	0	0	642372	163870	36667	0	82170	0	48762	44100	213230	0	0	0	0	47424	69513	0	134712
CSHPOS	Phosphatidylcholines	PC35:2 A	Peak height	52922721	C00157	CCCCCCCCCCCCCCCCC(=O)O[C@H](COC(=O)CCCCCCC/C=C\C/C=C\CCCCC)COP(=O)([O-])OCC[N+](C)(C)C	MJWAVUYQCBFFHQ-WESJWMGVSA-N	ONLI_0306	11366815	12186199	6524096	8551505	12897930	10639856	10439112	8474059	8233616	7904426	8862871	12572847	16040301	6838894	9789726	9532526	13270818	15637714	15385575	16976750	17752076	10181993	9505808	7105043	8490120	8388132	17503156	15964979	17224768	10457971	9827278	10460963	18387382	13890368	11411497	7934121	7404083	7881758	16428617	7066150	13691914
CSHPOS	Triacylglycerols	TAG 53:3; TAG 17:0-17:0-19:3;	Peak height	NA		0	0	ONLI_0307	1731306	1283254	732685	1963538	1984249	1555004	752517	1205537	1549612	1643441	1533580	3211153	2922914	689633	1892014	633510	2869687	2721558	3971526	1416438	2938210	1284266	1176528	792011	2097638	1153279	2632039	2174255	3276519	1844668	1977258	1225836	4025242	2079108	1025187	1280520	468633	830618	1230664	467580	2138212
CSHPOS	Cholesteryl esters	CE (20:3)	Peak height	53477892	C02530	CCCCC/C=C\C/C=C\C/C=C\CCCCCCC(=O)O[C@H]1CC[C@@]2(C3CC[C@]4(C(C3CC=C2C1)CCC4[C@H](C)CCCC(C)C)C)C	MLPRJPSMAFZPLA-PJSAOELNSA-N	ONLI_0308	1171635	1942303	1567533	3314556	2020382	9202809	2999966	3735208	3680868	948481	5048434	10485080	5653058	1565800	1668016	1197992	2623875	3166897	3199296	1688411	11896294	1788427	1465543	1470000	6584948	2344393	1553944	2825590	3328965	1463669	1671781	1953409	2809898	3343663	5638172	1280901	1961257	3879653	2581376	1961721	2711870
CSHPOS	Linoleic acids and derivatives	DAG 36:4; DAG 18:2-18:2;	Peak height	9543729	C00165	CCCCC/C=C\C/C=C\CCCCCCCC(=O)OC[C@H](CO)OC(=O)CCCCCCC/C=C\C/C=C\CCCCC	MQGBAQLIFKSMEM-ZHARMHCNSA-N	ONLI_0310	1331812	1079650	658715	972262	1963502	1075237	706258	746812	1000002	1183059	1025719	1054678	1405621	581366	1013986	960220	1594994	1605557	1645715	2021024	1636379	1008919	1201738	1044097	1404814	1125521	2180343	1453476	2241050	1268218	1226515	1290836	2482129	1077460	678810	1184814	615720	548789	1498699	494171	1515140
CSHPOS	Triacylglycerols	TAG 55:4; TAG 18:1-18:2-19:1;	Peak height	138214690		CCCCCCCCC/C=C\CCCCCCCC(=O)OCC(COC(=O)CCCCCCCCC/C=C\CCCCCC)OC(=O)CCCCCCCC/C=C\C=C/CCCCC	MUPLOFIEWBEBDZ-GMWWFSEGSA-N	ONLI_0311	403875	337432	159813	459110	683998	632466	285124	300087	362956	376110	575332	1343677	761672	168685	392031	174897	739104	741402	1055469	503586	988860	346906	336346	164359	756890	277523	562447	514240	858849	515246	312784	319194	1257787	453817	222285	277603	138058	178477	394803	140651	685782
CSHPOS	Triacylglycerols	TAG 48:4; TAG 12:0-18:2-18:2;	Peak height	138214981		CCCCCCCCCCCC(=O)OCC(COC(=O)CCCCCCCC/C=C\C=C/CCCCC)OC(=O)CCCCCCCC/C=C\C=C/CCCCC	MVLRQPPTISTJFW-ZHSZNRNPSA-N	ONLI_0312	99060	52559	0	93846	202773	109039	51071	47085	145231	160529	103666	216024	163657	33258	125691	52566	161184	283185	266871	150793	239840	56285	99009	30541	140712	98647	302099	169716	440900	167431	98008	132121	291637	133799	49708	56551	37806	32596	145384	27582	226619
CSHPOS	Phosphatidylethanolamines	PE 18:1-18:1;	Peak height	9546757	C00350	CCCCCCCC/C=C\CCCCCCCC(=O)OC[C@H](COP(=O)(O)OCCN)OC(=O)CCCCCCC/C=C\CCCCCCCC	MWRBNPKJOOWZPW-NYVOMTAGSA-N	ONLI_0313	388243	383277	160256	248828	422133	295066	263208	222330	269183	288638	265152	578337	484379	138426	381310	237313	517837	558333	595194	664428	632016	335148	313179	192799	305718	256103	684318	468618	795876	242271	296233	340211	729074	662809	302032	215132	128754	219159	569763	110553	500747
CSHPOS	Cholesteryl esters	CE (18:2)	Peak height	131801653	C15441	CCCCC/C=C\C/C=C\CCCCCCCC(=O)O[C@H]1CC[C@@]2(C3CC[C@]4(C(C3CC=C2C1)CCC4[C@H](C)CCCC(C)C)C)C	NAACPBBQTFFYQB-XHDSEGDBSA-N	ONLI_0314	70219968	66203768	53232404	92579832	60599700	153855456	66315216	84821600	84122024	50862724	94702632	177975744	149796656	57886404	81538280	56685760	78647984	88522544	96293432	79348808	140966080	74400472	62094872	57662512	131833840	70516736	79583488	91664792	104197848	70269368	57796880	61700816	77229024	74192152	99635040	57943716	70357760	72176776	79481264	61906036	78064344
CSHPOS	Triacylglycerols	TAG 54:8; TAG 16:0-18:3-20:5;	Peak height	131755359		CCCCCCCCCCCCCCCC(=O)OC[C@@H](COC(=O)CCC/C=C\C/C=C\C/C=C\C/C=C\C/C=C\CC)OC(=O)CCCC/C=C\C/C=C\C/C=C\CCCCC	MLMMWEQUUKJWQX-VOLMLRHSSA-N	ONLI_0315	772994	566671	310440	533848	1004313	944855	450911	604987	456168	456443	877985	965029	1097598	303557	449570	168084	1404276	1494024	1524253	690057	1183090	584553	588023	428309	448366	775029	1303816	1202951	1563244	888324	1155173	368334	1472007	815656	945499	621791	376189	360371	519940	351910	529293
CSHPOS	Phosphosphingolipids	SMd36:2	Peak height	6443882	C00550	CCCCCCCCCCCCC/C=C/[C@H]([C@H](COP(=O)([O-])OCC[N+](C)(C)C)NC(=O)CCCCCCC/C=C\CCCCCCCC)O	NBEADXWAAWCCDG-QDDWGVBQSA-N	ONLI_0316	2047820	2051024	4268494	3444672	2639394	2982106	2348268	3725466	2968553	2569104	2306793	2548964	2770145	3724925	3812658	3521388	2514319	2966701	3064706	2817259	3243826	3794830	4001033	4797203	3568372	5509446	2443632	2768504	3199040	3505937	4193200	3904107	2771135	2557403	3157194	3345050	4886831	5721578	3670165	3922038	2102657
CSHPOS	Phosphatidylcholines	PC 42:10; PC 20:4-22:6;	Peak height	52923327		CCCCC/C=C\C/C=C\C/C=C\C/C=C\CCCC(=O)OC[C@H](COP(=O)([O-])OCC[N+](C)(C)C)OC(=O)CC/C=C\C/C=C\C/C=C\C/C=C\C/C=C\C/C=C\CC	APEHGLQXFOZAEF-MHNOHXJZSA-N	ONLI_0317	1478505	1514465	934705	1096735	1974631	2751998	1468447	1237734	508481	916697	2004702	2290726	2223928	1380296	1134417	739243	2259504	2052325	1984201	1284653	2587683	734632	946556	686475	678839	869050	1281093	2773280	2590259	1159691	1203722	882346	2525914	2721114	2316884	975640	880909	1043650	1419704	1260853	1833693
CSHPOS	Triacylglycerols	TAG 56:8; TAG 18:2-18:3-20:3;	Peak height	131763293		CCCCC/C=C\C/C=C\CCCCCCCC(=O)OC[C@@H](COC(=O)CCCCCC/C=C\C/C=C\C/C=C\CCCCC)OC(=O)CCCC/C=C\C/C=C\C/C=C\CCCCC	MWPUONRBGFMSLE-FXGUSIRISA-N	ONLI_0318	7071122	2892780	3875316	4960751	5207889	4249360	2215689	4643958	4022138	4760571	3461272	3776057	5134564	3204149	3760283	2528759	5934256	4200874	4618328	5157642	4563200	5286679	7267010	4899792	5490029	4953642	6082210	4969212	4406564	5268083	6771619	4230604	7431690	2999942	3496530	6673208	3202415	3390271	5243634	2894855	2571842
CSHPOS	Triacylglycerols	TAG 55:4; TAG 15:1-19:0-21:3;	Peak height	138219306		CCCCCCCCCCCCCCCCCCC(=O)OC(COC(=O)CCCCCCC/C=C\CCCCC)COC(=O)CCCCCCC/C=C\C=C/C=C\CCCCCCC	NJIJHXNPEZSWHJ-GGRUKSBGSA-N	ONLI_0319	614936	387019	200505	642591	713463	525010	224817	376887	257588	422152	518615	882567	757494	208516	529585	156339	1009773	1021891	1153930	600331	817323	391227	412285	212154	494112	302800	771595	600905	1174870	470880	584545	383681	1517028	597515	245977	302071	179615	191974	451200	141340	772644
CSHPOS	Phosphatidylcholines	PC36:4 A	Peak height	52922783	C00157	CCCCCCCC/C=C\CCCCCCCC(=O)O[C@H](COC(=O)CCCC/C=C\C/C=C\C/C=C\CCCCC)COP(=O)([O-])OCC[N+](C)(C)C	NKQPOVROGSWLTO-NVPMBMBWSA-N	ONLI_0320	414279456	393556352	367436608	383561760	511557408	548221440	472525792	387533760	272059168	297819040	474850944	521576512	491804160	426907104	336030528	320865600	506019840	567952192	459295680	418828416	655992320	316949760	427549024	369316032	330305888	390353024	364861856	556503488	507974336	370202944	461557568	390495232	552291072	511365056	659614272	372450176	406593088	484996000	465627168	390857632	436804928
CSHPOS	1-(1Z-alkenyl),2-acyl-glycerophosphocholines	PCo-42:5	Peak height	52924034		CCCCCCCCCCCCCCCCCC/C=C\OC[C@H](COP(=O)([O-])OCC[N+](C)(C)C)OC(=O)CCCCC/C=C\C/C=C\C/C=C\C/C=C\CCCCC	NLEDXBSUDVLSEN-UFFJXODHSA-N	ONLI_0321	98747	108895	117353	74637	86881	153273	78802	112806	95624	119018	83060	128705	96560	99905	45281	67213	97399	135593	124095	97022	103175	87100	109280	98293	102647	105910	84206	89426	105304	82134	94503	78216	77543	113134	114895	115030	107091	110315	92298	98220	80761
CSHPOS	Triacylglycerols	TAG 54:4; TAG 16:1-18:0-20:3;	Peak height	131759314		CCCCCCCCCCCCCCCCCC(=O)O[C@@H](COC(=O)CCCCCCC/C=C\CCCCCC)COC(=O)CCC/C=C\C/C=C\C/C=C\CCCCCCCC	IJAGVFPXKMAQRV-PGYKOVLESA-N	ONLI_0322	52810804	50866736	30025090	91534216	115200624	87418488	36926556	63826636	73754320	77195496	52821184	142731440	138230144	32451570	54234916	36717344	101286640	81160544	122800120	47344612	123861592	69419520	56035444	38791444	130772424	53999436	81274112	80191912	139314336	103366528	70368592	66248100	173481168	83878392	35529440	65836140	32117926	40826160	59696896	22417294	100122576
CSHPOS	Phosphatidylcholines	PC 36:0; PC 18:0-18:0;	Peak height	94190	C00157	CCCCCCCCCCCCCCCCCC(=O)OC[C@H](COP(=O)([O-])OCC[N+](C)(C)C)OC(=O)CCCCCCCCCCCCCCCCC	NRJAVPSFFCBXDT-HUESYALOSA-N	ONLI_0323	544180	583092	1163327	1028014	746132	688622	722126	1209000	845960	813889	657872	595134	724255	856275	928283	805723	724206	642217	677653	677657	917958	999675	1117614	1119839	1118095	1157672	633102	931484	784926	1003883	1102004	1245535	781716	869225	974477	1021482	1256480	1422118	883516	1253136	637021
CSHPOS	1-alkyl,2-acylglycerophosphoethanolamines	PE 36:5e; PE 16:0e/20:5;	Peak height	52925030		CCCCCCCCCCCCCCCCOC[C@H](COP(=O)(O)OCCN)OC(=O)CCC/C=C\C/C=C\C/C=C\C/C=C\C/C=C\CC	NTBDNAWCQLUDHG-CEGBOXLASA-N	ONLI_0324	410333	434063	396422	406324	549316	533271	477712	446331	387641	389469	317323	471826	517050	486554	388632	384632	436829	538349	571495	443770	696018	495843	481635	479104	374650	445052	451295	504716	489125	424319	482753	445570	559767	528295	731557	500051	513671	464492	701432	438345	576927
CSHPOS	Phosphatidylcholines	PC16:0/18:2	Peak height	134753865	C00157	CCCCCCCCCCCCCCCC(=O)OC[C@H](COP(=O)([O-])OCC[N+](C)(C)C)OC(=O)CCCC/C=C/C/C=C/CCCCCCCC	NVWYLRLKCCCUBZ-UOBGCCIWSA-N	ONLI_0325	37688384	34762336	41403976	39599580	29590414	35307832	29828164	39776108	38286416	39912932	35704492	32418468	32924232	36960916	39599180	29618012	34313464	34912460	34500156	36088004	31474816	35109316	38613168	39182880	34308308	37059936	35363872	32480954	33909412	37989140	51949896	32950926	32823016	33497152	35930856	39785116	37506504	36453984	34506120	38042228	29995568
CSHPOS	Triacylglycerols	TAG 44:1; TAG 12:0-16:0-16:1;	Peak height	138225270	C00157	CCCCCCCCCCCCCCCC(=O)OC(COC(=O)CCCCCCCCCCC)COC(=O)CCCCC/C=C\CCCCCCCC	OBZBCSUQYLLPST-BZZOAKBMSA-N	ONLI_0326	0	30756	28495	0	28877	37885	0	30464	36472	0	0	43647	34738	0	31060	30438	42663	46177	55941	0	52729	27776	39384	0	136083	0	55351	39270	124026	30660	41051	44676	98251	48113	35458	0	0	38558	0	0	58246
CSHPOS	Phosphatidylcholines	PC33:1	Peak height	52922442	C00157	CCCCCCCCCCCCCCCCC(=O)O[C@H](COC(=O)CCCCCCC/C=C\CCCCCC)COP(=O)([O-])OCC[N+](C)(C)C	OFRWLQSOUIZELQ-VEAYGOGPSA-N	ONLI_0327	1844913	2275668	725804	1337046	2981088	1994852	2278020	1119747	896863	1133213	2444880	3657442	2249465	1214155	1518572	764122	2912207	4406933	3394906	2582063	4516984	934668	802493	599008	678546	796369	2164075	2398055	4397596	1213361	1122550	950501	2998820	2855789	2695160	876077	756202	807188	1133234	761584	3348254
CSHPOS	Triacylglycerols	TAG 54:5; TAG 18:0-18:2-18:3;	Peak height	131756093		CCCCCCCCCCCCCCCCCC(=O)OC[C@@H](COC(=O)CCCC/C=C\C/C=C\C/C=C\CCCCC)OC(=O)CCCCCCC/C=C\C/C=C\CCCCC	FOOVNYMOCOZYCS-FEJMAITCSA-N	ONLI_0328	82051616	70271056	47374780	99354288	152815184	79388216	44315084	72203832	122761512	119830936	58673964	129577136	184049264	46284108	97144136	81620560	147209664	115112592	172015904	110477696	149891728	105056184	100823672	81681824	181483824	79329952	155937632	108662632	245328192	131614792	103663672	154567376	267313840	144124032	38507480	94148824	50327524	53272924	140981296	37049420	193333952
CSHPOS	Triacylglycerols	TAG 56:8; TAG 16:1-18:1-22:6;	Peak height	131759453		CCCCCC/C=C\CCCCCCCCCC(=O)O[C@@H](COC(=O)CCCCCCC/C=C\CCCCCC)COC(=O)CC/C=C\C/C=C\C/C=C\C/C=C\C/C=C\C/C=C\CC	OBEVBHFXQRTJAZ-AAMJSBRJSA-N	ONLI_0329	13572474	8627755	6864238	9141538	9495657	10049331	7927446	9675505	6362466	8609181	9640270	10007007	11050089	8950408	8203319	5154778	12887445	12895425	13310751	9990556	8458087	12400046	10604742	8948742	10337173	11099773	11913018	11445018	9441554	13742546	17934494	6351902	13311716	6540572	9102366	10899576	7810910	8714876	8001840	7837333	5323904
CSHPOS	Phosphatidylcholines	PC37:3	Peak height	52922657		CCCCCCCCCCCCCCCCCC(=O)OC[C@H](COP(=O)([O-])OCC[N+](C)(C)C)OC(=O)CCCCCCC/C=C\C/C=C\C/C=C\CC	WZCLAXMADUBPSG-RIXBAXMTSA-N	ONLI_0330	1233838	1158865	864842	1105296	1522800	1440177	1172579	963588	707234	764816	1525057	1662295	1503877	1194640	1278129	710800	1582059	2242882	1814122	1309060	2435469	1101718	810475	669598	664984	915220	1380869	1820327	1720274	1293167	1425117	769038	1919392	1804800	1455782	788990	865205	849256	1299386	1089178	1530399
CSHPOS	1,2-diacylglycerols	DAG 24:0; DAG 12:0-12:0;	Peak height	33979		CCCCCCCCCCCC(=O)OCC(CO)OC(=O)CCCCCCCCCCC	OQQOAWVKVDAJOI-UHFFFAOYSA-N	ONLI_0331	10412178	9304229	9243652	12034222	11623092	11500602	10777952	9832046	9670256	9539325	6994126	13091249	11906577	8802102	11603056	10154611	10454211	11521385	13129548	9504461	13024034	9944011	11464449	12556937	12326074	10059117	13976302	11722492	10743899	10258454	11448295	10557762	15349012	11478351	11221579	9267021	11914420	10078593	11903805	11440723	9628478
CSHPOS	Phosphatidylcholines	PC35:4	Peak height	52922330	C00157	CCCCCCCCCCCCCCC(=O)OC[C@H](COP(=O)([O-])OCC[N+](C)(C)C)OC(=O)CCC/C=C\C/C=C\C/C=C\C/C=C\CCCCC	ZSWHHKKYMMYPPD-MSZSINMWSA-N	ONLI_0332	871925	778197	488713	687101	938014	1137339	815153	687514	597552	576199	749361	884263	1040684	912455	588237	668747	1073917	1064207	1139595	1086241	1289241	649502	654922	475052	530362	507480	1174273	1076354	957857	722321	618737	706174	1335086	723223	963714	597093	584987	693390	1172930	489891	760548
CSHPOS	Triacylglycerols	TAG 56:1; TAG 16:0-18:1-22:0;	Peak height	131755163		CCCCCCCCCCCCCCCCCCCCCC(=O)OC[C@H](COC(=O)CCCCCCCCCCCCCCC)OC(=O)CCCCCCCCC/C=C\CCCCCC	OZXLEWFIONDQJM-SKYDHSLNSA-N	ONLI_0333	193209	169742	0	296289	271103	578223	247634	254291	283493	144321	839207	1823876	1139057	32622	249513	65855	567335	329791	695988	225722	1645805	158348	121031	66074	1205098	433448	350364	257010	520452	63384	160439	158414	1303714	277847	144375	56123	60143	252690	372457	0	687105
CSHPOS	Triacylglycerols	TAG 46:1; TAG 14:0-16:0-16:1;	Peak height	131753273		CCCCCCCCCCCCCCCC(=O)O[C@@H](COC(=O)CCCCCCCCCCCCC)COC(=O)CCCCCCC/C=C\CCCCCC	JYICXCHHKWVGEI-FIZKWYBOSA-N	ONLI_0334	114910	144437	110381	170937	324767	337030	143792	65892	240744	251354	270590	868019	569760	129533	351479	103802	336210	539094	834704	133539	1269915	148074	108352	110279	435297	136254	461481	336700	1375008	240467	215009	252675	488605	521743	149901	145421	61581	134995	114804	111088	1212839
CSHPOS	1-acyl-sn-glycero-3-phosphocholines	LPC 22:1	Peak height	53480471		CCCCCCCC/C=C\CCCCCCCCCCCC(=O)OC[C@H](COP(=O)([O-])OCC[N+](C)(C)C)O	PAFOXYLFALKPOE-BKAVPCLVSA-N	ONLI_0335	374046	453358	160099	168634	440498	322344	458519	172296	151725	141706	337100	463228	369118	188733	190312	106716	467717	506949	458561	453728	663672	169219	144343	122021	124596	176504	352462	561027	569230	152657	133868	145887	492647	495341	455060	181021	181314	148924	334231	165376	532896
CSHPOS	Sphingomyelins	SMd32:2	Peak height	52931131		CCCCCCCCCCCCCC(=O)N[C@@H](COP(=O)([O-])OCC[N+](C)(C)C)[C@@H](/C=C/CCCCCCCC/C=C\CCC)O	PEJGMBUENJSLLH-RHAKMSQVSA-N	ONLI_0336	0	32460	0	28640	37287	27115	20749	29292	0	0	36924	32273	37805	38817	32706	0	0	40186	42168	30949	31942	31458	18190	0	30212	31523	0	30997	0	0	29644	27407	20897	33361	34018	0	0	61334	34018	67183	26791
CSHPOS	Linoleic acids and derivatives	DAG 36:5; DAG 18:2-18:3;	Peak height	9543737		CCCCC/C=C\C/C=C\CCCCCCCC(=O)OC[C@H](CO)OC(=O)CCCCCCC/C=C\C/C=C\C/C=C\CC	PGXBELQFNRPKBC-WBVIKXMWSA-N	ONLI_0337	260406	196626	48984	124648	278762	137577	130960	122048	192603	217628	170122	161897	305923	87555	200390	195081	310416	329510	320528	404576	293088	148152	159790	165199	282727	177237	361730	313945	530368	278207	308266	303245	489967	241736	138533	164561	111462	125012	267620	61951	409057
CSHPOS	Triacylglycerols	TAG 42:0; TAG 12:0-14:0-16:0;	Peak height	131803451		CCCCCCCCCCCCCCCC(=O)OC[C@H](COC(=O)CCCCCCCCCCC)OC(=O)CCCCCCCCCCCCC	PGZSAELMQZLYOA-WBCKFURZSA-N	ONLI_0338	0	32327	40195	0	31373	0	0	31837	56073	0	33511	0	0	47519	0	33063	40754	45348	47349	0	0	0	0	0	50431	39820	46772	39829	47806	30289	0	0	59306	27242	30270	33173	27631	30287	25606	26645	0
CSHPOS	1-(1Z-alkenyl),2-acyl-glycerophosphocholines	PCp-40:7 or PC o-40:8	Peak height	53480839		CCCCCCCC/C=C\CCCCCC/C=C\OC[C@H](COP(=O)([O-])OCC[N+](C)(C)C)OC(=O)CC/C=C\C/C=C\C/C=C\C/C=C\C/C=C\C/C=C\CC	PWAHARWXEAMNGK-VCDFOAEJSA-N	ONLI_0339	382441	383633	446540	513253	645872	824079	352809	406290	293702	306849	476951	633101	563695	446590	559297	196754	572478	835804	769416	532645	734776	418041	445297	366709	237428	602298	476621	668150	766799	398440	676507	376087	738999	655651	933787	374930	368038	425505	726137	680206	437647
CSHPOS	Triacylglycerols	TAG 54:6; TAG 18:1-18:2-18:3;	Peak height	100921577		CCCCCCCC/C=C\CCCCCCCC(=O)OC[C@@H](COC(=O)CCCCCCC/C=C\C/C=C\C/C=C\CC)OC(=O)CCCCCCC/C=C\C/C=C\CCCCC	OTUIORVXGJUHBH-JBQDKWDBSA-N	ONLI_0340	21256054	21011994	8116542	23230390	50290200	20289210	8557352	18214450	52116492	46403940	16031318	48467980	88067168	9662792	40827128	33984712	58551068	47957636	83145160	47877764	79810192	34314560	35470020	22787592	86015224	22917592	96110792	48383268	148976048	56114540	37377044	86704976	144881760	59259504	9048578	25640818	10142925	16657369	74160336	7855258	114578984
CSHPOS	1-acyl-sn-glycero-3-phosphoethanolamines	LPE 18:1	Peak height	9547071		CCCCCCCC/C=C\CCCCCCCC(=O)OC[C@H](COP(=O)(O)OCCN)O	PYVRVRFVLRNJLY-MZMPXXGTSA-N	ONLI_0341	357777	392587	336829	450276	513262	505187	292588	468617	314596	455696	315366	524019	461103	404350	488626	373787	473491	498333	478791	500457	719472	557628	391576	370865	388476	359450	381577	426122	509401	396222	394840	445712	516117	454619	308356	334304	329462	426895	367021	370499	447237
CSHPOS	Phosphatidylcholines	PC34:0	Peak height	24778686	C00157	CCCCCCCCCCCCCCCCCC(=O)O[C@H](COC(=O)CCCCCCCCCCCCCCC)COP(=O)([O-])OCC[N+](C)(C)C	PZNPLUBHRSSFHT-RRHRGVEJSA-N	ONLI_0342	3030648	3466883	4869993	4635449	4351797	3793034	3500078	4912698	4512442	3799795	3474194	4408502	4509976	3946517	5239406	3952062	4245446	4009844	4338766	4076833	5943512	4832250	5128726	5080152	4644821	5258422	3702516	5365686	4945684	4645284	5810346	4952286	5007448	5578102	5101648	4728874	5284160	6086859	5574566	5177015	3825480
CSHPOS	Phosphosphingolipids	SMd42:1	Peak height	5283595		CCCCCCCCCCCCCCCCCCCCCCCC(=O)N[C@@H](COP(=O)(O)OCC[N+](C)(C)C)[C@@H](/C=C/CCCCCCCCCCCCC)O	QEDPUVGSSDPBMD-XTAIVQBESA-O	ONLI_0343	2742548	2014151	1497740	1904834	1831963	1734142	2794124	2025417	1328173	1659166	1706196	1507000	1439760	1970517	2115606	1573608	1879706	2684778	1865347	2607407	2326028	1958798	1453441	1688038	1421962	1717984	2472001	1669357	2732712	1656704	1852427	1596143	2359726	1413397	2088069	1638458	1574402	1846820	1957998	1911644	1713437
CSHPOS	1-alkyl,2-acylglycero-3-phosphocholines	PCo-34:3	Peak height	24779293		CCCCCCCCCCCCCCCCOC[C@H](COP(=O)([O-])OCC[N+](C)(C)C)OC(=O)CCCC/C=C\C/C=C\C/C=C\CCCCC	QEWRXEALGMKRGP-MZWPLUPDSA-N	ONLI_0344	956752	1195877	658579	693693	1330776	905140	1008153	779571	700959	776278	895034	1550682	1405879	679824	1112169	978256	1484275	1403866	1462498	1590920	1754440	1099502	758429	755769	923630	704451	1231304	1404681	1598763	1016831	806474	1066668	1268709	1274380	999272	655810	679802	750751	1248054	546806	1498271
CSHPOS	Triacylglycerols	SMd34:0	Peak height	9544103		CCCCCCCCCCCCCCCCC(=O)OC[C@H](COC(=O)CCCCCCC/C=C\CCCCCCCC)OC(=O)CCCCCCC/C=C\CCCCCCCC	ANBFFIILUQJIQL-XFGXVVNZSA-N	ONLI_0345	899889	901483	946525	935175	1041656	942378	1132825	963843	781332	898528	698046	1098448	962241	1107499	1307541	1293835	861379	1402846	1049458	1411835	1286623	1342511	1234372	1210643	1534682	1214423	1246197	1377475	1195126	1113529	1300926	1393444	1846660	1014123	1524636	1130587	1210321	1423474	1478538	984971	1115371
CSHPOS	Phosphatidylcholines	PC 32:1; PC 16:0-16:1;	Peak height	6443788		CCCCCCCCCCCCCCCC(=O)OC[C@H](COP(=O)([O-])OCC[N+](C)(C)C)OC(=O)CCCCCCC/C=C\CCCCCC	QIBZFHLFHCIUOT-NPBIGWJUSA-N	ONLI_0346	6451668	10157512	4773228	8006450	19722902	17851880	13524732	6874598	5130622	5503898	17132184	24877466	14347167	6043928	10058722	3421370	14553937	27587922	17048420	10430266	41211772	4377286	5053684	4320435	4028118	6777604	8150721	16768036	38638552	6805802	5878629	5343432	15633827	20895700	24097028	4096206	5495716	7323852	7377861	6533544	25696870
CSHPOS	Triacylglycerols	TAG 58:9; TAG 18:1-18:2-22:6;	Peak height	131760203		CCCCCC/C=C\CCCCCCCCCC(=O)OC[C@@H](COC(=O)CC/C=C\C/C=C\C/C=C\C/C=C\C/C=C\C/C=C\CC)OC(=O)CCCCCCC/C=C\C/C=C\CCCCC	NWOHTDXNYMHGGE-HAXGSABZSA-N	ONLI_0347	9160261	4697654	4491797	6917088	7832636	6035562	4377397	7995912	3500458	5816538	3718034	5854241	7006386	5738609	3397697	4024796	9339084	5901006	6516668	5607170	4799575	12499389	8739008	6427808	10408033	5655065	6267130	5783520	4732892	11972189	7653408	4701329	11021965	3338840	3861990	8915785	5761378	4191060	4483988	4537683	2925901
CSHPOS	Phosphatidylcholines	PC39:6	Peak height	24778795		CCCCCCCCCCCCCCCCC(=O)OC[C@H](COP(=O)([O-])OCC[N+](C)(C)C)OC(=O)CC/C=C\C/C=C\C/C=C\C/C=C\C/C=C\C/C=C\CC	KSRURLYJRNYEOH-SHHFQLSYSA-N	ONLI_0348	2765604	2404181	2494887	2442456	2630630	2856721	2526154	2444332	1687264	1511588	2010851	2432533	2635327	2931088	1966820	1445101	2598088	2854686	2362934	2395062	3225536	2122213	2504972	2075846	1717508	2338521	2850718	2918619	2600042	2653191	2344272	1802790	3494723	2237756	2731677	2407336	2363489	2419424	2740742	2308704	1747149
CSHPOS	1-alkyl,2-acylglycero-3-phosphocholines	PC 38:6e; PC 16:0e/22:6;	Peak height	16759366		CCCCCCCCCCCCCCCCOC[C@H](COP(=O)([O-])OCC[N+](C)(C)C)OC(=O)CC/C=C\C/C=C\C/C=C\C/C=C\C/C=C\C/C=C\CC	QQQQNYAHSSIZBU-HIQXTUQZSA-N	ONLI_0349	518663	470686	395224	412996	638102	768899	305027	540959	424221	499171	540988	758348	683266	410271	550754	216082	933962	932111	939793	473074	783348	265635	446535	316225	221847	608314	767488	650120	989200	334589	1291487	275886	1044280	1161169	985697	359456	270164	512556	803062	490660	578744
CSHPOS	Triacylglycerols	TAG 53:4; TAG 17:1-18:1-18:2;	Peak height	9544155		CCCCCCCC/C=C\CCCCCCCC(=O)O[C@H](COC(=O)CCCCCCC/C=C\CCCCCCC)COC(=O)CCCCCCC/C=C\C/C=C\CCCCC	VESVDAJIPQIOEH-NAAHWEMHSA-N	ONLI_0350	1609312	1497174	665982	1577632	2809918	2092428	965035	1350306	1835350	1596734	1652679	3886847	3931641	795754	1993682	1040822	3001556	3076276	4718645	2088389	3811468	1573328	1268494	990328	3101871	1270984	3286854	2521690	4296350	2439308	1625329	1849696	5035034	2135492	988781	1329183	583216	961159	2053285	540595	3276467
CSHPOS	Phosphatidylcholines	PC37:4	Peak height	52922853		CCCCCCCCC/C=C\CCCCCCCC(=O)O[C@H](COC(=O)CCCCCCC/C=C\C/C=C\C/C=C\CC)COP(=O)([O-])OCC[N+](C)(C)C	QRPUCJXFPYFTMB-FBFLODOBSA-N	ONLI_0351	3730500	3024432	3304865	3883570	3237418	4224810	3271935	3622162	2611646	2554049	3206628	3053299	3523391	4123998	2359825	2706594	3564140	3519684	2958320	3484243	4036550	2668510	3242111	2975629	2207582	3450462	3049718	3799659	2894656	3152832	3439336	3160358	4338242	2882898	4120065	3468117	2872451	3346784	3738003	3013792	2109684
CSHPOS	Triacylglycerols	TAG 56:8; TAG 16:0-18:2-22:6;	Peak height	131755335		CCCCCCCCCCCCCCCC(=O)OC[C@@H](COC(=O)CC/C=C\C/C=C\C/C=C\C/C=C\C/C=C\C/C=C\CC)OC(=O)CCCCCCC/C=C\C/C=C\CCCCC	RDZINTYLBOTMAU-CQEMWSBKSA-N	ONLI_0352	16022829	10672862	6066702	9749176	14586892	11348477	9746400	10807778	7585308	11184211	9185184	15296231	18044226	9515457	8750999	7348424	21075710	19296770	23091736	13910857	11359208	17002054	12870677	11123168	22247758	12174754	22542086	16855050	17313090	23887078	18691834	9747827	29838928	7740938	8303698	14018971	8515532	9774641	12283682	7033330	10247247
CSHPOS	Phosphatidylcholines	PC 40:8e; PC 18:2e/22:6;	Peak height	NA		0	0	ONLI_0353	87546	41232	110840	104744	134665	125400	30488	99029	67620	75653	83160	110162	104907	74605	79023	40919	85875	140562	127159	45854	169119	47169	119521	80724	48009	163002	102760	122970	116645	78427	117076	89641	112880	97561	93890	87078	86396	104728	100621	82508	55758
CSHPOS	1,2-aminoalcohols	Heptadecasphing-4-enine	Peak height	5283557		CCCCCCCCCCCC/C=C/[C@H]([C@H](CO)N)O	RBEJCQPPFCKTRZ-LHMZYYNSSA-N	ONLI_0354	12150063	13227757	11405820	13017373	12019858	12470875	11781347	11049727	10505934	11697492	9437157	12685737	12277045	13059829	11895632	7563584	12972324	12055846	12416750	11794395	12699929	12293750	12846403	14903585	14519448	11918763	12930331	12061544	12019495	13486712	16819072	14163957	13044096	11892449	14191110	12774935	14221630	12596408	12203465	11844125	13934061
CSHPOS	Acyl carnitines	AC 20:4;	Peak height	136212424		CCCCC/C=C\C/C=C\C/C=C\C/C=C\CCCC(=O)O[C@H](CC(=O)[O-])C[N+](C)(C)C	RBFQHRALHSUPIA-JTPUQHSZSA-N	ONLI_0355	186009	99228	315538	431891	260395	158984	211726	421432	109590	142074	209986	150149	149487	330249	196422	83014	163599	179107	122994	173013	203495	186690	282365	265411	189659	298117	93472	178674	153415	194757	233468	139965	131927	120760	383368	415150	306971	187277	103322	383686	74285
CSHPOS	Triacylglycerols	TAG 52:1; TAG 16:0-18:0-18:1;	Peak height	5365005	C00422	CCCCCCCCCCCCCCCCCC(=O)OC(COC(=O)CCCCCCCCCCCCCCC)COC(=O)CCCCCCC/C=C\CCCCCCCC	NPCZZYKITFKRQZ-RFBIWTDZSA-N	ONLI_0356	1693419	1742636	1081547	2393279	2978495	3003611	1594056	1945285	7335168	3317359	2853185	11340460	6332616	1089626	4259469	1660402	3017995	3992520	8014340	1678249	10278073	1685269	1883103	1483650	7119944	2060314	4119319	3021456	7904964	2630764	3464081	3528224	7114919	5799568	1439374	2427098	1017551	2362579	2019006	749097	9116358
CSHPOS	1-alkyl,2-acylglycero-3-phosphocholines	PCo-40:4	Peak height	52923852		CCCCCCCCCCCCCCCCCCCCOC[C@H](COP(=O)([O-])OCC[N+](C)(C)C)OC(=O)CCC/C=C\C/C=C\C/C=C\C/C=C\CCCCC	RDNHPNJCALITSY-MBZSPAKGSA-N	ONLI_0358	215725	293923	364695	268141	323702	283630	224228	301996	270825	361386	185416	337690	334026	319642	290049	327137	281428	273906	351385	278498	384084	349585	390725	383072	361731	352196	231961	268160	275257	339443	350680	438904	269951	337182	258206	353059	427496	481308	333819	276246	251920
CSHPOS	Cholesteryl esters	CE (20:2)	Peak height	53477891		CCCCC/C=C\C/C=C\CCCCCCCCCC(=O)O[C@H]1CC[C@@]2(C3CC[C@]4(C(C3CC=C2C1)CCC4[C@H](C)CCCC(C)C)C)C	REFJKOQDWJELKE-NJJZEKHRSA-N	ONLI_0359	57254	148127	67873	49964	111740	847850	223163	301643	449826	62975	333670	2021574	651829	54903	67743	42543	195901	185504	192288	128699	1560904	61807	134466	116619	898165	165216	114687	176400	191052	44973	63323	135595	229133	173459	354125	56440	165569	358755	228283	54227	136106
CSHPOS	Triacylglycerols	TAG 50:5; TAG 14:0-16:0-20:5;	Peak height	131753291		CCCCCCCCCCCCCCCC(=O)O[C@@H](COC(=O)CCCCCCCCCCCCC)COC(=O)CCC/C=C\C/C=C\C/C=C\C/C=C\C/C=C\CC	REVSLNKZXRDJPV-ROXMGXQMSA-N	ONLI_0360	327707	390110	115571	391988	874888	639250	250255	240192	388579	504149	653310	939409	869088	144885	462152	151036	989764	1196291	1284350	534072	1225952	404677	380001	234677	375210	459209	1047990	902763	1869787	838431	750150	302462	1074638	576614	439974	330252	131846	215423	331133	161355	605515
CSHPOS	Triacylglycerols	TAG 58:3; TAG 18:1-18:2-22:0;	Peak height	138251358		CCCCCCCCCCCCCCCCCCCCCC(=O)OCC(COC(=O)CCCCCCCCC/C=C\CCCCCC)OC(=O)CCCCCCCC/C=C\C=C/CCCCC	REWHXIGYTWQEOU-RUAITIBSSA-N	ONLI_0361	471278	551463	57145	535829	768809	820051	337739	325840	791967	501798	800190	2614823	1628410	81174	644974	325178	988769	839255	1627947	620189	2209911	280578	278270	151309	1485872	482336	952817	643584	1511120	346090	371652	688030	2314373	607844	227704	241915	72147	376774	822496	79347	1229138
CSHPOS	Cholesteryl esters	CE (18:1)	Peak height	5283632	C14641	CCCCCCCC/C=C\CCCCCCCC(=O)O[C@H]1CC[C@@]2([C@H]3CC[C@]4([C@H]([C@@H]3CC=C2C1)CC[C@@H]4[C@H](C)CCCC(C)C)C)C	RJECHNNFRHZQKU-RMUVNZEASA-N	ONLI_0362	1485858	906193	1945224	4267678	982500	5230652	1112886	2649415	4595966	1120333	1757809	3066226	2618209	1525424	949265	1166048	1009101	915582	941614	1045375	3002758	2140560	1340897	1724584	5103036	1986339	525596	1093775	809200	1034997	544444	1126510	833078	891694	1738898	1507092	1848276	2840428	912301	1169508	684476
CSHPOS	1-acyl-sn-glycero-3-phosphocholines	LPC 15:0	Peak height	24779458	C04230	CCCCCCCCCCCCCCC(=O)OC[C@H](COP(=O)([O-])OCC[N+](C)(C)C)O	RJZVWDTYEWCUAR-JOCHJYFZSA-N	ONLI_0363	1378462	1324313	936190	1353514	1477744	1608862	1014023	1573512	929790	1207775	1172107	1391219	1482362	1474441	1362065	935683	1568834	1710221	1781382	1729697	1705305	1445837	1256524	1207157	1038266	1160360	1513444	1405712	1421926	1436128	1219587	1298912	1602268	1196354	1165936	1219343	1162845	1228626	1331470	930734	1292105
CSHPOS	Triacylglycerols	TAG 44:2; TAG 14:0-14:1-16:1;	Peak height	131753421		CCCCCCCCCCCCCC(=O)OC[C@@H](COC(=O)CCCCCCC/C=C\CCCCCC)OC(=O)CCCCCCC/C=C\CCCC	SGPSMGCUZQMTGS-CCRVATGYSA-N	ONLI_0364	0	34338	0	0	31407	0	0	0	34044	32985	0	38541	39575	0	34826	34347	40980	39226	101140	30036	48049	26997	0	31104	29022	0	49854	31722	157287	34630	32863	41482	52564	37757	0	0	0	0	39120	0	142811
CSHPOS	Triacylglycerols	TAG 52:4; TAG 16:0-18:1-18:3;	Peak height	131755181		CCCCCCCCCCCCCCCC(=O)OC[C@@H](COC(=O)CCCCCCC/C=C\C/C=C\C/C=C\CC)OC(=O)CCCCCCCCC/C=C\CCCCCC	VMDPPWLXQNSYER-RPLIZZJZSA-N	ONLI_0365	45403740	40743924	28888258	42186200	53705964	46501472	32609756	37616744	50217780	45260416	50767208	59460704	60894880	32039348	44731100	30957158	56810088	58960324	62867960	50445720	59276584	43326956	43297068	41988384	58591904	53079440	56094824	56257036	61634340	55263260	57886156	46275128	62923808	46896640	39633240	42784324	29976424	37672096	48294432	25664564	52841120
CSHPOS	Phosphosphingolipids	SMd34:1	Peak height	5283590		CCCCCCCCCCCCCCCC(=O)N[C@@H](COP(=O)(O)OCC[N+](C)(C)C)[C@@H](/C=C/CCCCCCCCCCCCC)O	RWKUXQNLWDTSLO-GWQJGLRPSA-O	ONLI_0366	12589099	13502394	19407530	17582610	16619743	16712119	13703364	19579958	13870866	15240067	13600694	15858701	15812667	20384948	23276594	17652436	14822172	19697028	18110376	17206204	23101652	19276818	20737182	22199026	18154286	23458530	15703256	17557390	17643584	19729670	19293100	18171396	18332522	15071849	17648074	16655662	20855842	22194716	18764952	19934382	14594764
CSHPOS	Phosphatidylcholines	PC33:2	Peak height	52922715	C00157	CCCCCCCCCCCCCCC(=O)O[C@H](COC(=O)CCCCCCC/C=C\C/C=C\CCCCC)COP(=O)([O-])OCC[N+](C)(C)C	SBNDHGBVMZMSNL-UESLNCBNSA-N	ONLI_0367	3865730	3977770	1686468	2135722	3991912	3487592	3372359	2441662	2137698	2497188	2619770	4212628	4582490	2197782	2523570	2500998	4157878	5042678	5123443	6022566	5216654	3066088	2541028	1953331	2471738	2073304	5968255	4080443	5019698	2949287	2195392	3221184	5415644	3228385	3124622	2167929	1989305	2241008	4553650	1457568	3727466
CSHPOS	Alkyldiacylglycerols	TAG 52:0; TAG 16:0-18:0-18:0;	Peak height	131755032		CCCCCCCCCCCCCCCCCCOC[C@H](COC(=O)CCCCCCCCCCCCCCC)OC(=O)CCCCCCCCCCCCCCCCC	CEEXXJUVQPNYKF-IONAWPRUSA-N	ONLI_0368	2416607	2419417	4961242	2002641	3042166	5835444	2938413	5513372	6201238	5116101	3489367	6478226	5409546	2923647	4864619	3447629	2505323	3951249	5051894	4519229	4372156	4757354	4316212	2497660	4259466	5160680	4619862	4596294	2988328	2851669	6515546	2283201	3269292	5016924	2067334	4545909	2469786	3299956	4511349	4535993	2414920
CSHPOS	Triacylglycerols	TAG 51:2; TAG 16:0-17:0-18:2;	Peak height	138259707		CCCCCCCCCCCCCCCCC(=O)OC(COC(=O)CCCCCCCCCCCCCCC)COC(=O)CCCCCCCC/C=C\C=C/CCCCC	SEJGBQZTRJHHNJ-OCGDUTRDSA-N	ONLI_0369	878995	1174026	432842	1206656	1980820	2069480	809752	863787	2674672	1406375	1747268	7006367	4048252	458119	1632190	678470	2283892	2995216	5286716	1035601	6244806	695098	562656	457744	2690520	736190	2163738	2024359	3500877	1615428	1280864	1212756	4010035	2541062	934624	702353	297267	709502	801405	342056	3740349
CSHPOS	1-acyl-sn-glycero-3-phosphocholines	LPC 24:0	Peak height	24779481		CCCCCCCCCCCCCCCCCCCCCCCC(=O)OC[C@H](COP(=O)([O-])OCC[N+](C)(C)C)O	SKJMUADLQLZAGH-WJOKGBTCSA-N	ONLI_0371	520805	619865	632698	644304	809273	654882	645195	656365	575901	612007	627549	882090	775872	679805	809670	560034	776855	948112	934303	805928	949360	690995	753980	594953	626270	764744	796468	872879	1099663	686883	707592	744900	868140	779537	847910	637989	763380	736496	840865	638847	761070
CSHPOS	1-alkyl,2-acylglycero-3-phosphocholines	PC 36:2e; PC 18:1e/18:1;	Peak height	53481725		CCCCCCCC/C=C\CCCCCCCCOC[C@H](COP(=O)([O-])OCC[N+](C)(C)C)OC(=O)CCCCCCCCC/C=C\CCCCCC	GSROTDACALJGFK-YIFANWOHSA-N	ONLI_0372	855247	833331	701515	514143	992948	756458	907659	614930	503628	627305	583273	1153514	1004037	536164	544756	680379	888464	1028263	955498	969397	1055945	839888	745391	892366	824322	897994	865343	963656	936172	622900	735940	765478	928496	1077187	899632	685453	862885	636458	1103450	553287	870034
CSHPOS	Phosphatidylcholines	PC 36:2	Peak height	10350317		CCCCCCCC/C=C\CCCCCCCC(=O)OC[C@H](COP(=O)([O-])OCC[N+](C)(C)C)OC(=O)CCCCCCC/C=C\CCCCCCCC	SNKAWJBJQDLSFF-NVKMUCNASA-N	ONLI_0373	619880512	667591872	499931488	607105664	808966528	647461888	669595008	617167872	576762432	549349824	547378240	882330688	870351040	478508608	736035456	592248640	782176000	863675456	908790592	862685824	1108383232	709274432	696006592	573308096	654098880	600690176	897568960	889488896	991823872	750632448	813506112	726624640	916215168	972639680	770225472	615189376	636435648	683054784	871623040	572884544	928920640
CSHPOS	1-acyl-sn-glycero-3-phosphocholines	LPC 18:2	Peak height	11005824		CCCCC/C=C\C/C=C\CCCCCCCC(=O)OC[C@H](COP(=O)([O-])OCC[N+](C)(C)C)O	SPJFYYJXNPEZDW-FTJOPAKQSA-N	ONLI_0374	243689184	202718944	245144480	302731328	320126816	287227744	242256912	336263136	210560000	295109536	232761904	348725376	368879936	243242384	431534464	254177024	298698624	301656128	383281632	353854464	467886880	380055360	312166880	297956160	363024384	266801888	258689936	350202272	352616608	329409376	370971104	396074720	305501632	344414464	257605776	310282848	324873376	311720320	270781920	259190672	342934912
CSHPOS	Phosphatidylcholines	PC36:6	Peak height	52922847	C00157	CCCCC/C=C\C/C=C\C/C=C\CCCCC(=O)O[C@H](COC(=O)CCCCCCC/C=C\C/C=C\C/C=C\CC)COP(=O)([O-])OCC[N+](C)(C)C	SPWBDEZMKCRQSX-NGPPOSSDSA-N	ONLI_0375	1667061	1344558	597895	1078862	2181422	3892226	1062323	984143	748824	570483	2777478	2749306	2078956	664544	850486	435766	2467472	3858410	2187612	1638728	4546560	719846	850800	413266	576962	759991	1801789	3034318	4130000	659539	828978	673184	3158218	2034066	3168856	577242	601475	642606	1496321	693238	1277467
CSHPOS	Cholesteryl esters	CE ( 22:1)	Peak height	16219158		CCCCCCCC/C=C\CCCCCCCCCCCC(=O)O[C@H]1CC[C@@]2([C@H]3CC[C@]4([C@H]([C@@H]3CC=C2C1)CC[C@@H]4[C@H](C)CCCC(C)C)C)C	SQHUGNAFKZZXOT-QXAJUEOOSA-N	ONLI_0376	96772032	152165520	139831920	298954272	110058976	461819296	162895120	271370528	373919872	109757640	154846512	385348672	335906144	129165944	114619280	134682848	147946496	135465968	187014768	122296864	243090928	123522136	97426040	155686624	506743968	214598688	103982416	150565296	112808888	135936704	86137912	165690768	121399752	90608608	187850192	141425472	161514880	281683392	151782960	126947496	136701776
CSHPOS	Phosphatidylethanolamines	PE 36:4; PE 18:2-18:2;	Peak height	9546812		CCCCC/C=C\C/C=C\CCCCCCCC(=O)OC[C@H](COP(=O)(O)OCCN)OC(=O)CCCCCCC/C=C\C/C=C\CCCCC	SSCDRSKJTAQNNB-DWEQTYCFSA-N	ONLI_0378	682320	816812	91815	374479	1012708	525770	490728	325662	423235	488553	386196	951040	850725	101495	395734	522148	883277	808529	789099	1378507	1381772	474071	505478	323159	476006	338461	1478101	855574	1712920	382541	315805	595538	1643087	943963	314730	366464	231699	394465	1483331	91315	912317
CSHPOS	Phosphatidylcholines	PC38:5 A	Peak height	52923235	C00157	CCCCC/C=C\C/C=C\CCCCCCCC(=O)O[C@H](COC(=O)CCCCCC/C=C\C/C=C\C/C=C\CCCCC)COP(=O)([O-])OCC[N+](C)(C)C	SUACBSWYGWBPFC-GPUJSUHJSA-N	ONLI_0379	61851016	58947956	57116416	91139904	85279352	98567368	61452896	73755392	50176448	52622904	76936304	78439088	90639816	69255560	45709056	45149364	91968256	83165480	65019408	50207708	123360800	55573148	58595640	50727940	42508560	57592012	46215336	89604800	76026896	65250164	63262940	52444268	84555736	87830368	96751480	53570404	54988252	61976896	62506620	77696120	62726308
CSHPOS	1-acyl,2-alkylglycero-3-phosphocholines	PCo-32:0	Peak height	173570		CCCCCCCCCCCCCCCCO[C@H](COC(=O)CCCCCCCCCCCCCCC)COP(=O)([O-])OCC[N+](C)(C)C	SVWBXNAUENUONE-LDLOPFEMSA-N	ONLI_0380	804285	937954	809620	693920	1155901	1010369	1166236	797518	518979	625526	901052	1088879	1006056	858524	833860	695212	891942	1382617	1240948	1279627	1312020	721776	879070	833645	803966	875404	1156698	1290120	1195613	801964	705311	917109	1261012	1081917	1268550	632428	889931	748713	1361088	844821	1012784
CSHPOS	Phosphosphingolipids	SMd41:1	Peak height	46891684	C00550	CCCCCCCCCCCCCCCCCCCCCCC(=O)N[C@@H](COP(=O)([O-])OCC[N+](C)(C)C)[C@@H](/C=C/CCCCCCCCCCCCC)O	SXZWBNWTCVLZJN-NMIJJABPSA-N	ONLI_0381	1388073	1019683	1166001	1302348	947070	1078516	1128209	1473029	989170	1062810	949835	765969	880374	1660528	1419784	1060598	873375	1087710	946314	1274187	1017089	1276027	1050282	1236396	1004252	1256109	1051798	819746	965950	1238297	1297335	1138500	954626	682010	981316	1001141	1174144	1346268	1148933	1406515	738980
CSHPOS	1-(1Z-alkenyl),2-acyl-glycerophosphocholines	PC 40:7e; PC 18:1e/22:6;	Peak height	42607430		CCCCCCCCCCCCCCCC/C=C\OC[C@H](COP(=O)([O-])OCC[N+](C)(C)C)OC(=O)CC/C=C\C/C=C\C/C=C\C/C=C\C/C=C\C/C=C\CC	TXHZYNSTTCIWMJ-RXSQUPBGSA-N	ONLI_0382	907217	742612	1222478	936748	981290	1039041	976178	906937	677679	762913	766099	815241	900603	987185	815225	941408	945851	1030238	952024	920310	898632	877241	1178584	1096135	1256236	1189710	960981	832282	793311	913552	945926	907851	723778	890713	821465	1092694	1059703	1087512	953489	621892	710878
CSHPOS	Triacylglycerols	TAG 47:2; TAG 14:0-16:1-17:1;	Peak height	138268019		CCCCCCCCCCCCCC(=O)OCC(COC(=O)CCCCC/C=C\CCCCCCCCC)OC(=O)CCCCC/C=C\CCCCCCCC	TXTUHJQIYSFKNK-YWVGYDOYSA-N	ONLI_0383	55130	0	0	0	71361	43500	36599	0	35914	52837	33722	83415	57077	0	54637	0	62423	154219	239113	55776	98452	0	0	0	224923	0	155063	57103	215058	58166	0	0	136567	0	38014	52302	0	39428	0	0	104878
CSHPOS	Triacylglycerols	TAG 55:3; TAG 18:1-18:2-19:0;	Peak height	138268805		CCCCCCCCCCCCCCCCCCC(=O)OCC(COC(=O)CCCCCCCCC/C=C\CCCCCC)OC(=O)CCCCCCCC/C=C\C=C/CCCCC	UAIFODZHZUTFRI-RUAITIBSSA-N	ONLI_0384	369558	328750	123543	381082	569356	573476	226147	210822	326031	251647	544222	1436253	809263	148072	478485	157966	631504	787135	1138207	426972	1085761	236050	219629	188937	712137	272271	538638	516567	818465	284296	305255	230949	1236251	481024	182123	241086	118832	150314	350955	136573	764014
CSHPOS	1-acyl-sn-glycero-3-phosphocholines	LPC 20:0	Peak height	24779473	C04230	CCCCCCCCCCCCCCCCCCCC(=O)OC[C@H](COP(=O)([O-])OCC[N+](C)(C)C)O	UATOAILWGVYRQS-HHHXNRCGSA-N	ONLI_0385	6195356	6645842	989879	1441849	5844761	4467750	7617308	1394114	901134	1504169	3964097	5808238	5537262	1571728	1676000	1291976	6850587	7637767	6377708	7142576	8037965	1666970	1317858	1268646	1619926	1493140	6983834	8093738	8445130	1816780	1391892	1485185	8939918	6973366	6576490	1390604	1432677	1218185	5241834	1518073	7714712
CSHPOS	Triacylglycerols	TAG 52:4; TAG 16:0-18:2-18:2;	Peak height	97042228	C00422	CCCCCCCCCCCCCCCC(=O)OC[C@@H](COC(=O)CCCCCCC/C=C\C/C=C\CCCCC)OC(=O)CCCCCCC/C=C\C/C=C\CCCCC	LXAWUIOWWNQCQA-QOFSRLOCSA-N	ONLI_0386	139070352	114702248	68122760	128320048	221845504	132537080	99264192	107476968	168326576	158687984	145648432	232025728	252151776	81282240	150763824	102463000	222486064	233282976	317851040	172409760	231462672	135479680	133410912	130958984	268820096	174507376	288293504	217824928	338441056	218342688	183263232	183391408	335290592	163396208	94280008	136812288	80591696	106708688	178391120	58790276	242641280
CSHPOS	Triacylglycerols	TAG 53:2; TAG 17:0-18:1-18:1;	Peak height	131802077		CCCCCCCCCCCCCCCCC(=O)OC[C@@H](COC(=O)CCCCCCC/C=C\CCCCCCCC)OC(=O)CCCCCCC/C=C\CCCCCCCC	ANBFFIILUQJIQL-AWWAHHQNSA-N	ONLI_0387	531661	608527	275467	712910	979692	905001	470460	518586	1414155	678858	894791	2990845	1886420	310104	960447	337056	1028873	1270251	2401833	593876	2703030	447966	406362	278822	1438008	411380	1062879	972307	1702963	854759	663746	643658	2267560	1148350	483034	436146	222638	434358	440804	203827	1926970
CSHPOS	Triacylglycerols	TAG 40:0; TAG 12:0-14:0-14:0;	Peak height	5127847		CCCCCCCCCCCCCC(=O)OCC(COC(=O)CCCCCCCCCCC)OC(=O)CCCCCCCCCCCCC	UGBCBXMLXHJYBS-UHFFFAOYSA-N	ONLI_0388	27687	36323	47205	52426	42102	30645	43145	35572	33939	34018	38034	41719	46242	35648	51193	28191	32806	32826	45801	30501	44485	51651	48825	36756	41230	46254	38943	27478	39447	34922	44589	0	48535	28625	46090	44591	24584	28076	37291	39380	32401
CSHPOS	Triacylglycerols	TAG 52:2; TAG 16:0-18:0-18:2;	Peak height	131750341	C00422	CCCCCCCCCCCCCCCCCC(=O)O[C@@H](COC(=O)CCCCCCCCCCCCCCC)COC(=O)CCCCCCC/C=C\C/C=C\CCCCC	MDCUASFVKLEFPW-NXNLMSDJSA-N	ONLI_0389	47980484	75566904	31986478	101108096	127041216	110039984	55077384	67198720	203200704	102601048	88043888	372156096	271269824	39706816	117163320	49767368	123307840	161788080	309661696	44896036	375415104	60333104	44189288	37088044	171948224	59348468	114430288	145999328	283412928	124889936	114519176	96805144	236604656	260881376	71081992	60001980	30558604	73750072	43138920	29661694	308023168
CSHPOS	1-acyl-sn-glycero-3-phosphocholines	LPC 22:0	Peak height	24779479		CCCCCCCCCCCCCCCCCCCCCC(=O)OC[C@H](COP(=O)([O-])OCC[N+](C)(C)C)O	UIINDYGXBHJQHX-GDLZYMKVSA-N	ONLI_0390	683768	763973	542795	534945	813572	566440	877334	559785	446840	468206	645894	788408	773715	616005	710508	444527	883213	1011913	913070	1019196	1013659	599321	486610	565302	501832	563789	1022055	947546	1133646	531313	665579	645492	992406	828051	866804	586263	602987	574069	917542	475426	890831
CSHPOS	Phosphatidylcholines	PC 16:0-14:0	Peak height	24778679	C00157	CCCCCCCCCCCCCCCC(=O)OC[C@H](COP(=O)([O-])OCC[N+](C)(C)C)OC(=O)CCCCCCCCCCCCC	UIXXHROAQSBBOV-PSXMRANNSA-N	ONLI_0391	1370794	1694818	1607828	2216414	2637637	2165203	1939930	1870232	1365372	1707778	1941213	2301004	2191307	1717414	1756507	1469193	1874378	2431624	2328810	2028631	2649512	1944763	1862376	1702620	1467519	1774618	1992674	2369657	3448837	1827489	2343068	1774348	2280512	2267028	2751038	1915828	1597680	1992444	2146424	1884649	1865038
CSHPOS	Phosphatidylcholines	PC 35:3; PC 17:1-18:2;	Peak height	52922545		CCCCCCC/C=C\CCCCCCCC(=O)OC[C@H](COP(=O)([O-])OCC[N+](C)(C)C)OC(=O)CCCCCCC/C=C\C/C=C\CCCCC	UJXPBTXUYBVHBS-SMHLTHDGSA-N	ONLI_0392	1214759	924447	987242	899411	1008136	882641	809879	768860	1105890	918877	1347844	807092	1007304	805568	975394	1213670	895369	1176798	918318	960061	1295380	1101480	960030	898568	879428	1243636	876015	872689	1026447	904438	955359	930233	1507884	847110	851237	1196425	975417	688874	830277	747020	731070
CSHPOS	Triacylglycerols	TAG 48:1; TAG 14:0-16:0-18:1;	Peak height	131753274		CCCCCCCCCCCCCCCC(=O)O[C@@H](COC(=O)CCCCCCCCCCCCC)COC(=O)CCCCCCCCC/C=C\CCCCCC	UPTISBGEYYYCRS-DLOIZKPKSA-N	ONLI_0393	1599611	2830029	887355	2958510	5990862	4803666	3035720	1734450	6079224	4346432	5078411	15692985	8919654	1303900	6995522	1682584	5406716	10011575	15438535	2345620	18241782	1667690	1627237	1122748	5386247	2809896	7335552	5885267	18468346	4535992	4602632	3890836	8181890	9214534	3035269	2280640	1104805	1803568	1777262	1181947	21012118
CSHPOS	1-(1Z-alkenyl),2-acyl-glycerophosphocholines	PCo-40:5	Peak height	52924022		CCCCCCCCCCCCCCCCCC/C=C\OC[C@H](COP(=O)([O-])OCC[N+](C)(C)C)OC(=O)CCC/C=C\C/C=C\C/C=C\C/C=C\CCCCC	UWNFEVACEPZILS-RNNLSGHUSA-N	ONLI_0394	117086	131691	130303	118993	183669	265695	172483	172446	110785	151576	124809	200012	151943	152115	91775	122990	156001	242421	222438	152496	193618	124734	175346	203578	147547	205243	237732	148429	164805	96271	164888	183873	238867	171067	247205	158378	164222	151353	195556	150742	152118
CSHPOS	Sphingomyelins	SM d40:3; SM d15:3/25:0;	Peak height	NA		0	0	ONLI_0395	624452	758803	560607	486836	1108396	1264849	731328	437963	395137	324687	1063614	1187046	1135975	562228	432367	254835	1009055	1062309	1208744	684853	2043574	465177	434470	465262	410454	532546	574122	1100940	1137708	428011	285955	380617	940725	1231692	1605368	470551	437317	502948	1060307	518518	1021096
CSHPOS	Phosphatidylcholines	PC34:3 A	Peak height	52923213	C00157	CCCCCCCCCCCCCC(=O)O[C@H](COC(=O)CCCCCC/C=C\C/C=C\C/C=C\CCCCC)COP(=O)([O-])OCC[N+](C)(C)C	VKVSSDKCKXJFIM-AFYHZPHLSA-N	ONLI_0396	11450527	13825290	5312046	9201560	19806634	25323752	14196207	8745969	4977937	6428578	20585592	19430060	16254385	6948456	7255848	4876572	17704008	24875394	15743239	14406557	27855674	7103688	7509227	5046030	5011246	7915437	10604446	19574620	25558212	6789069	7522250	5722140	20463532	14001261	21051660	5189405	6882416	6917886	13998060	7007910	15736693
CSHPOS	Monoalkylglycerophosphocholines	Lyso-PAF C-16	Peak height	162126		CCCCCCCCCCCCCCCCOC[C@H](COP(=O)([O-])OCC[N+](C)(C)C)O	VLBPIWYTPAXCFJ-XMMPIXPASA-N	ONLI_0397	1014744	1284865	716800	742041	1356093	1183800	1144665	878951	514738	662934	950637	1367941	1320179	939118	885479	760243	1269192	1440914	1533440	1319924	1613298	813166	770023	850259	863558	790741	1013960	1566124	1359810	840327	828060	947635	1235052	1462496	1340944	753370	894620	879447	1439911	936165	1788116
CSHPOS	Triacylglycerols	TAG 60:12; TAG 16:0-22:6-22:6;	Peak height	131755689		CCCCCCCCCCCCCCCC(=O)OC[C@@H](COC(=O)CC/C=C\C/C=C\C/C=C\C/C=C\C/C=C\C/C=C\CC)OC(=O)CC/C=C\C/C=C\C/C=C\C/C=C\C/C=C\C/C=C\CC	VLEDHTUUVAXNOJ-WJBWTTGGSA-N	ONLI_0398	390145	167523	326734	343649	311773	569494	157933	405829	181532	371990	318350	396065	459976	469816	325330	124595	626370	379981	449253	269080	294100	513491	521563	320505	370085	352852	303115	489928	237296	700530	991730	235189	606564	335775	384570	475666	275354	346579	263668	281992	149458
CSHPOS	Cholesteryl esters	CE (22:6)	Peak height	53477890	C02530	CC/C=C\C/C=C\C/C=C\C/C=C\C/C=C\C/C=C\CCC(=O)O[C@H]1CC[C@@]2(C3CC[C@]4(C(C3CC=C2C1)CCC4[C@H](C)CCCC(C)C)C)C	VOEVEGPMRIYYKC-IWVSHIRDSA-N	ONLI_0399	25874534	27519852	36550832	31892446	30780900	63523848	29582550	40365340	31821806	20234028	40454736	80216200	74012832	32364148	28093570	20254210	40520620	43086272	44298300	24013866	84550624	29742856	34910976	35170632	49022400	44732496	27801684	44973648	41515052	32972452	32689596	27015964	47758588	50957284	57819276	25616044	34721068	55586108	40485676	44524444	35268424
CSHPOS	Triacylglycerols	TAG 58:8; TAG 18:1-18:1-22:6;	Peak height	131760077		CCCCCC/C=C\CCCCCCCCCC(=O)OC[C@@H](COC(=O)CC/C=C\C/C=C\C/C=C\C/C=C\C/C=C\C/C=C\CC)OC(=O)CCCCCCCCC/C=C\CCCCCC	VULLTLRIKFDMHX-IPUZCYPISA-N	ONLI_0400	4131232	2848042	2415211	5451274	4593240	5671300	2785162	6345499	2891115	4021606	2641528	7472513	7078252	3293807	2619186	2453305	5442940	4429414	5173969	2557093	6149586	6689832	3747142	2711440	6976446	2998268	4144640	3839232	3059750	6990350	5037459	3158215	6200154	3346656	2949634	3958394	3269722	3103117	2026807	2695246	2654625
CSHPOS	1-(1Z-alkenyl),2-acyl-glycerophosphocholines	PCp-38:2 or PC o-38:3	Peak height	53480813		CCCCCCCC/C=C\CCCCCCCCCC(=O)O[C@H](CO/C=C\CCCCCC/C=C\CCCCCCCC)COP(=O)([O-])OCC[N+](C)(C)C	VXNFJZDUQIFCMO-WCXGAVHKSA-N	ONLI_0401	75753	68625	37628	77652	75976	40122	47998	39005	39351	39078	46140	97558	87590	30564	42654	31169	83913	100358	92917	47418	122317	72696	44316	42499	82185	46627	86499	39657	102836	42414	47043	74589	76363	107393	80581	75649	39168	80991	77650	41102	91598
CSHPOS	1-acyl-sn-glycero-3-phosphocholines	LPC 14:0	Peak height	460604	C04230	CCCCCCCCCCCCCC(=O)OC[C@H](COP(=O)([O-])OCC[N+](C)(C)C)O	VXUOFDJKYGDUJI-OAQYLSRUSA-N	ONLI_0402	750630	851808	847778	1256575	1175346	1300824	718318	1253961	908907	1127519	1134611	1252639	1362495	1142112	1381129	809969	1116539	1207287	1309398	972142	1732004	1149924	1145676	905097	1055558	1053365	865377	1061339	1295389	1302068	1249941	1026712	1003813	1164466	1033348	1001316	1074635	1104906	898346	1248592	1309636
CSHPOS	1-alkyl,2-acylglycero-3-phosphocholines	PC 36:3e; PC 16:0e/20:3;	Peak height	16759365		CCCCCCCCCCCCCCCCOC[C@H](COP(=O)([O-])OCC[N+](C)(C)C)OC(=O)CCCCCC/C=C\C/C=C\C/C=C\CCCCC	VYKSGWCIVDQIQR-MEAIPJDCSA-N	ONLI_0403	494416	533398	418107	475983	724254	603363	482368	432599	291792	333612	430598	684822	583567	410799	566567	379958	587926	744495	767000	620361	741859	376114	385887	354494	389940	455578	614572	717530	764219	463343	378985	419063	716236	761450	665416	296963	398332	378385	591154	456215	723143
CSHPOS	1-(1Z-alkenyl)-glycero-3-phosphocholines	LPC p-18:0	Peak height	24779527		CCCCCCCCCCCCCCCC/C=C\OC[C@H](COP(=O)([O-])OCC[N+](C)(C)C)O	WBOMIOWRFSPZMC-AYICAFKVSA-N	ONLI_0404	320963	398125	348747	325910	432263	410585	410842	370417	209234	303031	320037	398124	379984	395238	428506	294648	337206	480727	441309	335679	426754	327121	352185	369820	368080	376187	363206	458576	365033	387622	339584	369314	373750	391885	428347	320526	346844	369190	399514	489616	466628
CSHPOS	Triacylglycerols	TAG 49:2; TAG 15:0-16:0-18:2;	Peak height	131754166		CCCCCCCCCCCCCCCC(=O)O[C@@H](COC(=O)CCCCCCCCCCCCCC)COC(=O)CCCCCCC/C=C\C/C=C\CCCCC	DDWAXVHDVUVXSQ-ZDFZEWNHSA-N	ONLI_0405	502263	417471	191841	697322	904174	868076	391033	459916	631452	567124	792487	2044156	1184089	244506	680669	326983	937275	1267197	2086465	517564	2043312	347519	372841	317417	1254665	523481	1120842	657442	1528612	591596	582805	520360	1451960	777444	345514	371223	171098	342897	446987	144475	1494035
CSHPOS	Triacylglycerols	TAG 58:6; TAG 18:1-18:2-22:3;	Peak height	138286297		CCCCCC/C=C\CCCCCCCCCC(=O)OCC(COC(=O)CCCCCCCCCCC/C=C\C/C=C\C/C=C\CC)OC(=O)CCCCCCCC/C=C\C=C/CCCCC	WCIIIQSFALPOGU-CIRMXUQZSA-N	ONLI_0406	764940	613357	386190	840292	1124137	817360	354079	667641	639348	802709	668411	1517498	1367987	376212	749213	257543	1431057	1197784	1459407	550390	1282914	676384	624206	317248	812602	327416	814252	1131510	1124687	723705	977133	520171	1624138	1311473	614386	592230	262003	369585	325242	288360	1119921
CSHPOS	Triacylglycerols	TAG 56:9; TAG 16:1-18:2-22:6;	Peak height	131759576		CCCCCC/C=C\CCCCCCCC(=O)OC[C@@H](COC(=O)CC/C=C\C/C=C\C/C=C\C/C=C\C/C=C\C/C=C\CC)OC(=O)CCCCCCC/C=C\C/C=C\CCCCC	NPWRXJYSKONMPV-SRVQGIHESA-N	ONLI_0407	2896648	1471278	1098147	1578748	2298818	2446970	1078149	1972786	1214600	1405483	1833278	2147331	1928506	1086760	1292868	702113	2783252	3255917	2427060	1850692	1939470	2511283	2544225	1772946	1780594	2243454	2550758	2413260	2289968	2701509	2449112	1367578	3016655	1187131	1998666	2636798	1339765	1087460	2031475	1079347	916882
CSHPOS	1-acyl-sn-glycero-3-phosphocholines	LPC 18:3	Peak height	24779469		CC/C=C\C/C=C\C/C=C\CCCCCCCC(=O)OC[C@H](COP(=O)([O-])OCC[N+](C)(C)C)O	WKQNRCYKYCKESD-YVHLTTHBSA-N	ONLI_0408	1988458	1447752	1418877	1828864	2064839	1564094	1768925	1915072	1187299	1549628	1791250	2147703	1870956	1374030	2834050	1160431	2087105	2657893	2638788	2646409	2502302	1611398	1984462	1605277	1951270	1962492	1941365	2129366	2790828	1599741	2509569	1970271	2127549	2274157	1732787	1956317	1770422	1758070	1382943	1522111	2399209
CSHPOS	Triacylglycerols	TAG 54:5; TAG 16:0-18:1-20:4;	Peak height	131755177		CCCCCCCCCCCCCCCC(=O)OC[C@@H](COC(=O)CCC/C=C\C/C=C\C/C=C\C/C=C\CCCCC)OC(=O)CCCCCCCCC/C=C\CCCCCC	WKSLEDJKCJNITP-AHQIBYCWSA-N	ONLI_0409	27813998	23015314	18696040	34503496	37494148	26494370	15275231	26467588	34907204	34785852	21901236	36613956	42879068	17098502	29095016	24651252	36772992	30604820	39465028	31209050	40752076	30950104	34250356	25693952	41524128	27150332	34956124	30954352	47557920	36674340	32482342	39916008	48833772	39892128	15693296	31260726	19203962	19541236	39131028	15030050	40425472
CSHPOS	Phosphosphingolipids	N-Nervonoyl-D-erythro-sphingosylphosphorylcholine	Peak height	44260126	C00550	CCCCCCCCCCCCC/C=C/[C@H]([C@H](COP(=O)([O-])OCC[N+](C)(C)C)NC(=O)CCCCCCCCCCCCC/C=C\CCCCCCCC)O	WKZHECFHXLTOLJ-QYKFWSDSSA-N	ONLI_0410	3839435	2171746	2699482	3869702	2848775	3239564	2207600	3057229	1691335	2492160	2366378	2056737	2491228	2484598	2855110	1753071	2846225	3649270	2959447	2785801	4916465	2988989	2097225	2654344	1797714	2955440	2466505	2372993	3247685	1885912	2288746	1897911	2869636	1935734	3496704	2274418	2018418	2536091	3781488	2890898	1329105
CSHPOS	Triacylglycerols	TAG 58:8; TAG 18:0-18:2-22:6;	Peak height	131756104		CCCCCCCCCCCCCCCCCC(=O)OC[C@@H](COC(=O)CC/C=C\C/C=C\C/C=C\C/C=C\C/C=C\C/C=C\CC)OC(=O)CCCCCCC/C=C\C/C=C\CCCCC	HHLFQZIIXPUFCA-KIZDZYDBSA-N	ONLI_0411	3224285	2119938	2100809	3671392	2667082	2879874	1575067	3935692	1640917	3037924	1925443	3076184	2452304	2523870	2132926	1421234	3512351	2606014	2436022	1890750	2396418	4559749	3250217	2149113	2603790	1790687	1876383	2143884	1857320	4271393	4922736	1897693	3228672	2415946	1923009	3414722	1928230	1603247	1267121	2329078	1437984
CSHPOS	Triacylglycerols	TAG 56:3; TAG 14:0-20:0-22:3;	Peak height	138290251		CCCCCCCCCCCCCCCCCCCC(=O)OC(COC(=O)CCCCCCCCCCCCC)COC(=O)CCCCCCCCCCC/C=C\C/C=C\C/C=C\CC	WOXDUJQRLLENEU-JYISLEBKSA-N	ONLI_0412	2290088	2254449	574405	1591406	3360749	2874824	1227524	1089270	1206523	1448971	2889395	7091870	4215403	501964	2050971	534268	4227166	4151497	5505729	2457161	5635493	901174	1058322	609911	1833302	1237162	3623373	3530837	5116722	1151522	1641263	988651	6367744	3978530	1442606	932724	420360	756712	1711497	399485	4173663
CSHPOS	Triacylglycerols	TAG 53:4; TAG 16:0-17:0-20:4;	Peak height	134776734		CCCCCCCCCCCCCCCCC(=O)O[C@H](COC(=O)CCCCCCCCCCCCCCC)COC(=O)CCC/C=C/C/C=C/C/C=C/C/C=C/CCCCC	WQFNYIJLJYJWKK-BNJGEZIZSA-N	ONLI_0413	1573479	1287667	580604	1585215	2235170	1464209	684212	994940	1173673	1465462	1234874	2357936	2241907	685336	1483890	625321	2267920	2392500	3111306	1566703	2127220	1245530	1083117	782336	1563720	1074650	2212131	1882170	2743913	1902315	1603566	1324524	3383155	1575820	838710	1004396	518111	654915	1308856	438305	1876131
CSHPOS	1-alkyl,2-acylglycerophosphates	PCp-42:3 or PC o-42:4	Peak height	52929632		CCCCCCCCCCCCCCCCCCCCOC[C@H](COP(=O)(O)O)OC(=O)CCCCC/C=C\C/C=C\C/C=C\C/C=C\CCCCC	CQZWFFADRVQCKP-SANZOQRGSA-N	ONLI_0414	40930	49491	85759	44097	48733	108478	28079	76132	40454	75112	23338	75508	84520	47851	30457	40547	45633	77875	89556	50388	47082	43433	46851	49605	40668	38099	44016	96458	50417	44336	51919	80376	79631	85365	49787	98441	47730	81823	85003	42590	85555
CSHPOS	Triacylglycerols	TAG 51:5; TAG 15:0-18:2-18:3;	Peak height	131754537		CCCCCCCCCCCCCCC(=O)OC[C@@H](COC(=O)CCCCCCC/C=C\C/C=C\C/C=C\CC)OC(=O)CCCCCCC/C=C\C/C=C\CCCCC	VEGWTLAYXMHOLL-HHBBQONFSA-N	ONLI_0415	237094	159236	29043	189406	277950	144392	61409	91569	262964	302531	209058	272673	324484	43441	271653	172870	318055	465667	534333	310112	347697	198671	160834	98909	222456	127185	535129	220032	642521	277890	294414	247921	610360	266009	111087	96949	0	99641	290271	43820	313114
CSHPOS	Phosphatidylcholines	PC34:1	Peak height	5497103	C00157	CCCCCCCCCCCCCCCC(=O)OC[C@H](COP(=O)([O-])OCC[N+](C)(C)C)OC(=O)CCCCCCC/C=C\CCCCCCCC	WTJKGGKOPKCXLL-VYOBOKEXSA-N	ONLI_0416	240096592	264627296	159826752	212255216	345756256	277684192	281464064	182162144	154565536	149910640	292065984	468541920	298357600	169156288	284217696	88078136	292351424	481691872	365831744	279317760	586275136	154182304	139378544	136710816	118662296	169691568	228531296	301898688	586086656	185516992	165881008	152971936	359055936	427786176	429306080	159893280	135692256	164033520	160486304	162950432	432705792
CSHPOS	1-acyl-sn-glycero-3-phosphocholines	LPC 19:0	Peak height	24779472		CCCCCCCCCCCCCCCCCCC(=O)OC[C@H](COP(=O)([O-])OCC[N+](C)(C)C)O	WYIMORDZGCUBAA-AREMUKBSSA-N	ONLI_0417	2314215	2384225	906278	1149418	2246820	2182039	2313487	1234955	966942	977725	1998863	1993341	2210022	1393400	1468356	1108402	2395878	2571684	2388677	2784098	2714198	1294557	1111623	1090160	1202588	1191886	2620992	2624947	2185408	1431723	1092676	1096634	2954822	2282286	2177187	1060642	1104209	1031115	2956016	1258444	2369950
CSHPOS	Triacylglycerols	TAG 54:8; TAG 18:2-18:3-18:3;	Peak height	97161142		CCCCC/C=C\C/C=C\CCCCCCCC(=O)OC[C@@H](COC(=O)CCCCCCC/C=C\C/C=C\C/C=C\CC)OC(=O)CCCCCCC/C=C\C/C=C\C/C=C\CC	IMPMCCKWZKDAGE-GLLBNYCSSA-N	ONLI_0418	602225	554921	187099	644788	1288554	567649	177061	465165	1972629	1562200	583938	1576380	2512582	220852	1461569	820085	2101169	1903232	2981469	1980436	2761316	1313168	1375517	581209	1806576	712439	3580211	1934247	5319106	2031545	1900578	2726059	4514484	2206153	471704	649995	209148	515965	2651365	329005	2960672
CSHPOS	Triacylglycerols	TAG 58:11; TAG 18:2-18:3-22:6;	Peak height	131763405		CCCCC/C=C\C/C=C\CCCCCCCC(=O)OC[C@@H](COC(=O)CC/C=C\C/C=C\C/C=C\C/C=C\C/C=C\C/C=C\CC)OC(=O)CCCCCCC/C=C\C/C=C\C/C=C\CC	CCWQXSQVMPACON-RXTLCQEBSA-N	ONLI_0419	2595111	904911	1150431	1335084	1296597	1227776	1009583	1837519	1232780	1376248	1310001	881657	1322280	994802	1248167	695337	2406444	1609962	1202232	1824410	1356949	2003712	2533328	1608866	1416801	2194466	2288354	1500678	1431958	1473251	2768297	1321561	2067954	966286	1934067	2418075	1409945	1251500	1925580	1124080	563637
CSHPOS	Monoalkylglycerophosphocholines	Lyso-PC o-18	Peak height	2733532		CCCCCCCCCCCCCCCCCCOC[C@H](COP(=O)([O-])OCC[N+](C)(C)C)O	XKBJVQHMEXMFDZ-AREMUKBSSA-N	ONLI_0420	187130	216949	179455	166983	239985	213776	237289	216264	147329	163975	172066	201509	199946	209922	223308	158162	196461	219910	235015	220822	231348	175058	202810	223372	272687	212950	203535	232158	200941	185320	190507	215863	246225	228115	226715	189622	233381	239907	243726	214263	273536
CSHPOS	Cholesteryl esters	CE ( 24:1)	Peak height	53477888	C02530	CCCCCCCC/C=C\CCCCCCCCCCCCCC(=O)O[C@H]1CC[C@@]2([C@H]3CC[C@]4([C@H]([C@@H]3CC=C2C1)CC[C@@H]4[C@H](C)CCCC(C)C)C)C	PUKCXSHDVCMMAN-FYGHJIOESA-N	ONLI_0421	0	35270	0	292519	0	2733411	221568	191954	2128187	0	1262818	2109418	1723929	0	0	0	165529	0	48460	0	918623	0	43812	0	4358990	287772	0	0	0	0	0	46311	0	0	724622	51670	68935	893835	181643	0	41106
CSHPOS	Triacylglycerols	TAG 56:7; TAG 16:0-18:2-22:5;	Peak height	131755334		CCCCCCCCCCCCCCCC(=O)OC[C@@H](COC(=O)CCCCC/C=C\C/C=C\C/C=C\C/C=C\C/C=C\CC)OC(=O)CCCCCCC/C=C\C/C=C\CCCCC	RUFOURHRNYZYIN-LCRTUSODSA-N	ONLI_0422	11057324	5887632	7272546	9301074	9318818	7921756	4852618	8789746	7212923	8134218	6891924	7976495	10078124	5597614	6721178	4324097	10355783	8120325	9438637	7366607	7773816	8892332	10162565	6846344	8879757	8008588	9706524	9115888	7706626	9030334	11707290	6635152	11983988	6460226	6744360	9954447	5834548	6255722	6599460	4651427	5236860
CSHPOS	Triacylglycerols	TAG 56:5; TAG 18:1-18:2-20:2;	Peak height	131760192		CCCCCC/C=C\CCCCCCCCCC(=O)OC[C@@H](COC(=O)CCCCCCCCC/C=C\C/C=C\CCCCC)OC(=O)CCCCCCC/C=C\C/C=C\CCCCC	HLTNSFGECJJVPF-SGFVPPCASA-N	ONLI_0423	5008015	3966507	1731262	5258766	11288449	6362768	3306955	3746524	3627122	4438990	5703500	14943891	11426970	1755085	5373714	2146382	11515774	10002099	13481346	7330048	11671454	4179998	3945486	2328944	9797731	4450791	7658719	7071996	10894152	4776177	4609716	3304585	16966272	5043588	2574535	3507332	1802895	2294909	4495784	1103751	11590208
CSHPOS	Triacylglycerols	TAG 56:9; TAG 16:0-20:4-20:5;	Peak height	131755442		CCCCCCCCCCCCCCCC(=O)OC[C@@H](COC(=O)CCC/C=C\C/C=C\C/C=C\C/C=C\C/C=C\CC)OC(=O)CCC/C=C\C/C=C\C/C=C\C/C=C\CCCCC	XOJDXSDPICSSTA-FXRJZKPYSA-N	ONLI_0424	1647154	1457165	634772	1108398	2080942	1743824	1128534	1368834	738794	1125277	1278380	1714950	2186687	791661	993430	681953	2678948	2547397	2496486	1542028	1451579	1837206	1491870	1167171	1552932	1599285	2019481	2045575	2353396	2526658	1721760	998783	3128707	1029769	1290687	1741592	991487	881110	1484275	881649	953878
CSHPOS	Cholesteryl esters	CE ( 22:5)	Peak height	42608400		CC/C=C\C/C=C\C/C=C\C/C=C\C/C=C\CCCCCC(=O)O[C@H]1CC[C@@]2([C@H]3CC[C@]4([C@H]([C@@H]3CC=C2C1)CC[C@@H]4[C@H](C)CCCC(C)C)C)C	XOLZNHXNFMEUGA-DCDLNIKOSA-N	ONLI_0425	281051	314655	330532	606666	484858	1520017	502940	467240	886422	377708	999050	2757913	1241912	358364	481957	193580	705137	619534	602916	455834	2543216	373571	263859	185023	1332699	389059	234116	499785	583070	320407	363709	333681	694801	688079	1172401	204905	228665	613706	330487	551017	459303
CSHPOS	1,2-diacylglycerols	DAG 38:6; DAG 18:2-20:4;	Peak height	53478108		CCCCC/C=C\C/C=C\CCCCCCCC(=O)OC[C@H](CO)OC(=O)CCCCCC/C=C\C/C=C\C/C=C\C/C=C\CC	XQKXAZZSUMABAU-HKOSRXLCSA-N	ONLI_0426	576090	478739	236210	325312	520421	486666	385127	292943	261073	331137	329479	318801	436924	309022	261944	273850	486504	504360	365044	510495	383515	262056	459795	327290	342674	387094	522619	603466	511295	326275	452054	301860	641648	295106	438649	419881	300695	314090	371841	228119	257377
CSHPOS	1-acyl-sn-glycero-3-phosphocholines	LPC 20:3 b	Peak height	138300357		CC/C=C\C/C=C\C/C=C\CCCCCCCCCC(=O)OCC(COP(=O)([O-])OCC[N+](C)(C)C)O	XUDGAAFUMTTZCO-QNEBEIHSSA-N	ONLI_0427	6189239	6327508	6300510	8040884	9941525	9593283	7805452	8545053	3392536	6201772	9936917	12471394	10963549	8241800	11298961	4557668	10199763	12043856	11488820	7781788	22099772	8322905	6616456	5733308	7121712	5701008	5829400	12743703	12276053	8317416	9679254	8523215	8723117	16402359	9248713	6819590	7927918	7470106	5646582	8536632	13112510
CSHPOS	1-acyl,2-(1Z-alkenyl)-glycerophosphocholines	PCo-40:7 A	Peak height	53479405	C00157	CCCCCCCC/C=C\CCCCCC/C=C\OC(COC(=O)CCCCC/C=C\C/C=C\C/C=C\C/C=C\C/C=C\CC)COP(=O)([O-])OCC[N+](C)(C)C	XUVCLJCZWPTAIO-OAKHYACESA-N	ONLI_0428	763332	928936	764075	735081	1416575	1334851	969143	811783	552209	623133	959974	1394630	1156483	925196	921984	629093	974297	1458674	1311724	939381	1421892	739395	743753	723250	625688	773013	964263	1509261	1603682	829826	793542	833815	1290508	1436056	1351136	571924	900612	796654	1294195	905976	1315598
CSHPOS	Phosphatidylcholines	PC 36:6; PC 18:3-18:3;	Peak height	24778990		CC/C=C\C/C=C\C/C=C\CCCCCCCC(=O)OC[C@H](COP(=O)([O-])OCC[N+](C)(C)C)OC(=O)CCCCCCC/C=C\C/C=C\C/C=C\CC	XXKFQTJOJZELMD-JICBSJGISA-N	ONLI_0429	318774	340268	268439	367630	575076	688777	351264	345061	216536	294127	504582	635118	657877	357654	319400	173670	593980	610740	451283	317677	843462	266856	335283	183443	218702	237423	311974	619480	575584	413121	459376	296065	498995	539361	598485	284881	258386	302220	348205	344853	464645
CSHPOS	Triacylglycerols	TAG 58:9; TAG 18:2-18:2-22:5;	Peak height	131750598		CCCCC/C=C\C/C=C\CCCCCCCC(=O)OC[C@@H](COC(=O)CCCCC/C=C\C/C=C\C/C=C\C/C=C\C/C=C\CC)OC(=O)CCCCCCC/C=C\C/C=C\CCCCC	DNOZVMIUNWBFHO-OIANEIKYSA-N	ONLI_0430	8176703	4284242	5106230	7232528	6145630	5888166	3357499	7373001	3848101	5779576	4267443	4454903	4976192	5447684	3667797	2998528	7351956	5037198	4895582	4725046	4163455	9564668	7649898	5179979	5772332	5190384	4596094	4648510	3613933	8170340	8931783	3648414	6614866	3209759	4395369	7471789	5255266	3870904	4196431	4986736	2280199
CSHPOS	Cholesteryl esters	CE (20:5)	Peak height	53477889	C02530	CC/C=C\C/C=C\C/C=C\C/C=C\C/C=C\CCCC(=O)O[C@H]1CC[C@@]2(C3CC[C@]4(C(C3CC=C2C1)CCC4[C@H](C)CCCC(C)C)C)C	XZFUGMCJZFRBKF-JIKDAPOUSA-N	ONLI_0432	979228	1088762	855770	1276718	1592308	2941691	2108574	2260818	1489643	1008098	2067576	5184524	3303796	1207208	2227938	861005	2164921	3325164	3750965	1412630	6086938	1475664	1677633	1264144	2440144	2064638	1383670	2280366	3203492	2168206	2613200	1706363	2450154	3681386	2436250	1433472	1710051	2191764	1240572	1704313	3616317
CSHPOS	1-acyl-sn-glycero-3-phosphocholines	LPC 18:1	Peak height	16081932	C04230	CCCCCCCC/C=C\CCCCCCCC(=O)OC[C@H](COP(=O)([O-])OCC[N+](C)(C)C)O	YAMUFBLWGFFICM-PTGWMXDISA-N	ONLI_0433	44633400	47680844	46177776	64113824	73199664	66393816	48168680	61906944	36962228	45732216	57282044	80515912	65502404	53431060	64457148	34761908	60571424	73521344	66642248	51825196	126395912	50190328	41397252	40805876	47743900	46958992	35752476	65352588	92210696	52199732	54363080	52454880	62999376	86610144	65989308	43015452	46627780	50055640	39199088	56244856	85935272
CSHPOS	Triacylglycerols	TAG 47:1; TAG 15:0-16:0-16:1;	Peak height	131754159		CCCCCCCCCCCCCCCC(=O)O[C@@H](COC(=O)CCCCCCCCCCCCCC)COC(=O)CCCCCCC/C=C\CCCCCC	RCYIETYFTUBXFK-KWLHUJJFSA-N	ONLI_0434	71977	66975	48382	86981	128008	119971	99031	0	93030	57837	131655	244928	93479	37269	132118	62874	208477	176522	259451	45345	332310	64594	46180	105782	572910	74546	186020	256755	259522	120990	102659	111256	228274	112587	0	85846	0	121256	52843	47085	265236
CSHPOS	Phosphatidylethanolamines	PE36:2	Peak height	53479650		CCCCCCCC/C=C\CCCCCCCC(=O)OC[C@H](COP(=O)(O)OCCN)OC(=O)CCCCCCCCC/C=C\CCCCCC	ZTSRQLQWGSDQGP-RTJYTIBZSA-N	ONLI_0435	1344809	1511616	591820	828796	1707300	992314	1014060	729572	963832	969706	929902	2270605	1782860	359241	1226936	870934	1817595	2277646	2378849	2659041	3009854	1197477	1081886	692489	1160527	900543	2571419	1726441	3095536	928724	1254484	1213808	3072372	2549468	1030795	852416	579612	798379	2261813	424190	2437618
CSHPOS	1,2-diacylglycerols	DAG 34:1; DAG 16:0-18:1;	Peak height	5282283	C13861	CCCCCCCCCCCCCCCC(=O)OC[C@H](CO)OC(=O)CCCCCCC/C=C\CCCCCCCC	YEJYLHKQOBOSCP-OZKTZCCCSA-N	ONLI_0436	372610	437000	320991	415545	569545	680802	452268	368838	477148	483484	495009	722506	527079	327360	691255	308920	505403	785562	602077	456768	906950	334898	334294	266699	326116	291240	536546	640564	978455	438659	493451	328718	706508	790937	479811	357089	304645	365056	312166	291057	864622
CSHPOS	Triacylglycerols	TAG 54:3; TAG 18:0-18:1-18:2;	Peak height	131755942		CCCCCCCCCCCCCCCCCC(=O)OC[C@@H](COC(=O)CCCCCCC/C=C\C/C=C\CCCCC)OC(=O)CCCCCCCCC/C=C\CCCCCC	TVLMJMFKNWRCGI-HIAAHSCQSA-N	ONLI_0437	21352382	25454748	14415925	48235384	54683828	45904188	17795478	31250752	39678964	33242744	27826676	117158576	81587312	14637017	27079288	14453741	49447300	46799772	81954592	19363358	101991816	25312308	21005448	14700267	65055180	22222502	33291902	43576584	71278000	43198740	32771858	27001356	81145496	65378292	19667202	26394198	13221566	20390678	17512514	12096142	70360200
CSHPOS	Triacylglycerols	TAG 56:5; TAG 18:0-18:1-20:4;	Peak height	131755946		CCCCCCCCCCCCCCCCCC(=O)OC[C@@H](COC(=O)CCC/C=C\C/C=C\C/C=C\C/C=C\CCCCC)OC(=O)CCCCCCCCC/C=C\CCCCCC	YGKXJDDGNQKJPT-COCAYHFYSA-N	ONLI_0438	1343525	1093087	1053440	2060176	1888965	1924482	1013060	1763573	2651927	1727378	1597358	4348030	3650654	1125317	1504402	1059117	1888309	1644053	3088102	982410	3639702	1675126	1583304	1480772	5196748	1450635	1467420	1860518	2116091	2365144	2171370	1779390	3347383	1855220	1162830	1681305	1085524	1686961	1070782	912637	1854789
CSHPOS	1-alkyl,2-acylglycero-3-phosphocholines	PC 16:0/o-20:5	Peak height	10485310		CCCCCCCCCCCCCCCCOC[C@H](COP(=O)([O-])OCC[N+](C)(C)C)OC(=O)CCC/C=C\C/C=C\C/C=C\C/C=C\C/C=C\CC	YHSSHPWVFALMBA-IARQOZKNSA-N	ONLI_0439	2125574	2270164	2456099	2178814	3051627	2809884	2190078	2587292	2378392	2173009	2085674	3243160	3436122	2538014	2746024	2988594	2638082	2993092	3219444	2646876	4078596	2920112	2604266	2723208	2456315	2788250	2104702	3264446	3586290	2312136	2563041	2721645	3026251	3086098	3154916	2243334	2441662	3056728	3436828	2101264	2906416
CSHPOS	Phosphosphingolipids	SMd34:2	Peak height	52931145		CCCCCCCCCCCCC/C=C/[C@H]([C@H](COP(=O)([O-])OCC[N+](C)(C)C)NC(=O)CCCCCCC/C=C\CCCCCC)O	OAHFTKWSJGVMTG-MBIABJCFSA-N	ONLI_0440	2623690	2729793	2362630	2192179	3587976	3481369	2840675	2404866	1640084	1947109	3140011	3335575	3433141	2654452	2899373	1999125	3558092	3852881	3805115	3695166	4923880	2403707	2600450	2517912	2174105	2894966	3367012	3544611	4549676	2118118	2674516	2378508	3917936	3478110	4468317	2195819	2414589	2628876	3987227	2537301	3385012
CSHPOS	Acyl carnitines	AC 8:1	Peak height	70679121		CCCCC/C=C/C(=O)O[C@@H](CC(=O)[O-])C[N+](C)(C)C	LOSHAHDSFZXVCT-LXKVQUBZSA-N	ONLI_0441	29778	11977	14506	44799	38952	26383	33671	35151	12410	15210	12589	12271	15868	16327	14820	16668	11371	12292	9251	35599	14716	26785	16394	11063	32102	29392	12141	15506	15135	12227	15827	16296	26991	10492	39245	35823	20498	11518	9842	16907	8432
CSHPOS	1-(1Z-alkenyl),2-acyl-glycerophosphocholines	PCo-38:5 A	Peak height	53480715		CCCCCCCCCCCCCCCC/C=C\OCC(COP(=O)([O-])OCC[N+](C)(C)C)OC(=O)CCCCCC/C=C\C/C=C\C/C=C\C/C=C\CC	YPAPIRJFGNBODV-AMFPDOHCSA-N	ONLI_0442	2353134	3268986	2806859	2723841	3728086	3965509	3101003	2663937	1924213	2296392	2907663	3779678	3591771	2977197	2908884	2314326	3085486	4250732	4184924	3128636	3638150	2517254	2658439	2392974	2238238	2831020	3077254	4113720	4727364	2637257	2955604	2682215	3899716	3671961	4382835	2196968	2785150	2698574	4315607	3520856	3825270
CSHPOS	Phosphatidylethanolamines	PE 34:0; PE 17:0-17:0;	Peak height	46891875		CCCCCCCCCCCCCCCCC(=O)OC[C@H](COP(=O)(O)OCCN)OC(=O)CCCCCCCCCCCCCCCC	YSFFAUPDXKTJMR-DIPNUNPCSA-N	ONLI_0443	8337214	7634070	8025801	8720593	7967444	8737432	7910463	7950966	7032403	8058578	7321408	8373457	8409400	8463654	9348318	6927238	8839433	8637823	8905580	8962239	9502297	8245705	9067213	8912928	8203076	8601749	9016016	8664434	8265574	8213207	9077867	7926670	9199931	8139050	9572646	8551619	8134036	7922414	8250568	8518394	8218119
CSHPOS	Phosphatidylcholines	PC 39:5; PC 19:0-20:5;	Peak height	52922977		CCCCCCCCCCCCCCCCCCC(=O)OC[C@H](COP(=O)([O-])OCC[N+](C)(C)C)OC(=O)CCC/C=C\C/C=C\C/C=C\C/C=C\C/C=C\CC	YTUVRFVITPTFSM-ZDQXWTFCSA-N	ONLI_0445	867686	998729	305615	425150	980374	932150	710634	412652	389240	377742	781301	877007	1256872	256789	583989	419747	1217656	1401518	1280621	1755768	1618867	513684	492642	325320	336061	406767	1388904	1494555	1557179	521229	413837	411646	1821778	1430094	1115935	260536	282901	348499	1679264	365121	1011025
CSHPOS	Triacylglycerols	TAG 51:0; TAG 16:0-17:0-18:0;	Peak height	138309104		CCCCCCCCCCCCCCCCCC(=O)OCC(COC(=O)CCCCCCCCCCCCCCC)OC(=O)CCCCCCCCCCCCCCCC	YVLSJEQNDDKMQI-UHFFFAOYSA-N	ONLI_0446	51579	39226	38789	68563	49127	128613	41568	61665	56023	46330	159480	147294	67582	0	58925	0	103410	54078	160081	43708	143193	0	45771	35257	214414	65953	60554	0	58584	58952	132426	0	121857	37469	0	0	38418	53184	58679	33063	53610
CSHPOS	1-acyl-sn-glycero-3-phosphoethanolamines	LPE 16:0	Peak height	9547069		CCCCCCCCCCCCCCCC(=O)OC[C@H](COP(=O)(O)OCCN)O	YVYMBNSKXOXSKW-HXUWFJFHSA-N	ONLI_0447	972822	967213	932893	973618	1095724	1167185	951135	1070209	923495	997588	1006165	1406858	1221703	1007496	1396492	869029	1125847	1481516	1371840	1283692	1981566	1252780	1180539	1188529	1160734	1193072	1305251	1066409	1479168	1068789	1252337	1169109	1426555	1168285	1267884	1094443	1066017	1095764	955704	887326	1286700
CSHPOS	Phosphatidylcholines	PC34:4	Peak height	52922891	C00157	CCCCCCCCCCCCCCCC(=O)O[C@H](COC(=O)CCCC/C=C\C/C=C\C/C=C\C/C=C\CC)COP(=O)([O-])OCC[N+](C)(C)C	YWDDIWXKFJEMKF-JTZVLWBESA-N	ONLI_0448	455906	447280	340501	551771	684212	877023	406961	484253	337135	425653	722731	769046	737127	519283	459355	336001	776973	704640	716214	547717	931163	425067	422332	261405	321883	384699	405900	830517	846955	541389	553588	452215	715202	632089	709912	383877	417849	444338	467783	483015	600903
CSHPOS	Phosphosphingolipids	SMd39:1	Peak height	52931193		CCCCCCCCCCCCCCCCCCCCC(=O)N[C@@H](COP(=O)([O-])OCC[N+](C)(C)C)[C@@H](/C=C/CCCCCCCCCCCCC)O	YXSZOBWVQJIWNE-QVDCKBILSA-N	ONLI_0449	408109	352781	169874	161293	378510	441043	447863	225625	146930	151797	491666	344001	296194	224988	194953	141429	399962	483921	366730	429312	487164	180552	170659	238867	149942	225214	405277	546780	456968	183306	196689	151009	445157	370397	499626	142648	170227	157388	484363	191276	361414
CSHPOS	1-acyl-sn-glycero-3-phosphocholines	LPC 20:2	Peak height	52924053		CCCCC/C=C\C/C=C\CCCCCCCCCC(=O)OC[C@H](COP(=O)([O-])OCC[N+](C)(C)C)O	YYQVCMMXPIJVHY-ZOIJLGJPSA-N	ONLI_0450	1310045	1084066	1175201	1473500	1726179	1481125	1503088	1345012	610260	1169280	1311221	1828346	1747618	1331071	1823330	880211	1728888	1819839	1777362	1605188	2655369	1577458	951963	861954	1216469	1025392	1271213	2058398	1649687	1419443	1154933	1143522	1620390	1608336	1357676	1100371	1153383	925917	1159690	1361324	1742092
CSHPOS	1-acyl-sn-glycero-3-phosphocholines	LPC 20:1	Peak height	52924051		CCCCCCCC/C=C\CCCCCCCCCC(=O)OC[C@H](COP(=O)([O-])OCC[N+](C)(C)C)O	YYSFWGQAKJTHRE-MEOKJUQFSA-N	ONLI_0451	2068949	2156334	1017025	1357962	2649366	2667347	2070703	1231173	762480	965694	1870349	2532821	2670324	1141023	1060543	713092	2701740	2694180	2311081	2114700	4105677	1334115	922418	973926	1089856	1107096	1606143	3095177	2694528	1244043	927273	990276	2447700	3146935	2644750	1020066	1042428	1024108	2159771	1307319	2692754
CSHPOS	Triacylglycerols	TAG 62:2; TAG 18:2-22:0-22:0;	Peak height	9545738		CCCCCCCCCCCCCCCCCCCCCC(=O)OC[C@@H](COC(=O)CCCCCCC/C=C\C/C=C\CCCCC)OC(=O)CCCCCCCCCCCCCCCCCCCCC	VPZZYXWJCZKULK-CUUCRUSKSA-N	ONLI_0452	72933	41368	0	60646	83355	327072	50310	71409	153813	0	198943	159513	196810	0	0	45348	143093	56818	187128	0	401739	49547	46244	0	775721	144465	49217	0	81939	0	0	46681	239223	0	0	44763	0	53226	48692	0	145318
CSHPOS	Ceramides	Cer d42:1	Peak height	5283571	C00195	CCCCCCCCCCCCCCCCCCCCCCCC(=O)N[C@@H](CO)[C@@H](/C=C/CCCCCCCCCCCCC)O	ZJVVOYPTFQEGPH-AUTSUKAISA-N	ONLI_0453	559466	372392	305201	392300	553249	392354	586591	379192	401367	352376	340030	409113	377257	265528	575007	260204	443884	635619	548100	501167	556657	365879	364886	336391	372660	399236	580812	531410	704607	385646	413820	399407	615076	379297	603233	448775	319201	313830	249907	280176	437092
CSHPOS	Triacylglycerols	TAG 50:1; TAG 16:0-16:0-18:1;	Peak height	131750533		CCCCCCCCCCCCCCCC(=O)OC[C@@H](COC(=O)CCCCCCCCC/C=C\CCCCCC)OC(=O)CCCCCCCCCCCCCCC	ZKEWGTVAIGJNBK-ZMSSUMMHSA-N	ONLI_0454	8587927	12336549	5609244	15654403	22830204	18660282	11058306	10580354	39965268	19692282	17075406	68296104	44128364	6732321	26627286	10788232	21858164	29448000	58926552	10467266	64647860	10796924	9445357	7971284	34040504	12964296	27082120	23199246	59262012	19574344	20169674	22961296	47002472	40816772	10132949	12549554	5818050	13603178	12547666	4717622	68607344
CSHPOS	Triacylglycerols	TAG 52:6; TAG 16:1-18:2-18:3;	Peak height	131759571		CCCCCC/C=C\CCCCCCCC(=O)OC[C@@H](COC(=O)CCCCCCC/C=C\C/C=C\C/C=C\CC)OC(=O)CCCCCCC/C=C\C/C=C\CCCCC	NOOJQDXMGLPOOA-UJLFLSCOSA-N	ONLI_0455	943059	992795	313596	844907	2358635	1403072	786508	637091	1004825	954677	1280226	2118042	2111998	441968	961314	572238	2204092	2673724	2548589	1417183	1934313	938430	957582	735746	1489053	1188433	2495144	2199370	3843107	1952043	1238104	1359754	2769064	1072295	1211694	855517	462910	607351	1303591	354299	1818189
CSHPOS	Triacylglycerols	TAG 44:0; TAG 12:0-14:0-18:0;	Peak height	138315726		CCCCCCCCCCCCCCCCCC(=O)OCC(COC(=O)CCCCCCCCCCC)OC(=O)CCCCCCCCCCCCC	ZPXAKNNNRATWOJ-UHFFFAOYSA-N	ONLI_0456	42534	40087	65710	124737	64709	74348	44823	38208	49914	52611	61601	49480	74729	51321	49605	62147	130941	81512	119761	47337	179381	48347	50437	48765	190955	47274	54722	46080	63868	46239	49224	46987	78227	50480	53356	37853	54841	43925	44355	56457	143521
CSHPOS	1-(1Z-alkenyl),2-acylglycerophosphoethanolamines	PEo-38:5/or PEp-38:4	Peak height	53480855		CCCCCCCCCCCCCCCC/C=C\OC[C@H](COP(=O)(O)OCCN)OC(=O)CCCCCC/C=C\C/C=C\C/C=C\C/C=C\CC	ZTZQZGHJLWFLFQ-VZBWJDOASA-N	ONLI_0457	887392	1119707	928239	707191	1391190	970166	848571	1029774	1092402	874777	769837	1201455	1246127	1030666	921022	1118862	929742	1180625	1030797	945565	1318240	1130794	1307560	1170740	1255132	1328309	1458095	1185993	849679	1034685	1685685	1262635	862850	1034581	983504	1247096	1630906	1188191	1375456	1138584	825831
CSHPOS	Triacylglycerols	TAG 60:11; TAG 18:2-20:4-22:5;	Peak height	131763346		CCCCC/C=C\C/C=C\CCCCCCCC(=O)OC[C@@H](COC(=O)CCCCC/C=C\C/C=C\C/C=C\C/C=C\C/C=C\CC)OC(=O)CCC/C=C\C/C=C\C/C=C\C/C=C\CCCCC	CJMQGODMMNFMOQ-ORXARHRGSA-N	ONLI_0458	1971568	1078465	1350840	1848438	952227	1318568	887422	2317235	1481141	1843847	1167633	1092255	1510818	1367590	1453132	966520	2046187	1038960	1103160	1359802	1314315	2066750	2371380	1391439	1596062	1201053	1486651	1379908	949503	1424334	3008278	1811543	1899842	1172476	1824554	1959463	1395454	1478442	1413057	1344876	631120
CSHNEG	Medium-chain fatty acids	FA 11:0	Peak height	8180	C17715	CCCCCCCCCCC(=O)O	ZDPHROOEEOARMN-UHFFFAOYSA-N	ONLI_0471	220144	273658	159934	154290	306392	248514	257591	468816	143301	225703	266951	174178	351241	342335	276538	325683	194143	220288	178264	250869	239171	213013	215070	273875	296306	305890	211713	291249	190676	254980	192324	185277	229816	165423	238968	286345	209441	409599	206395	246058	166903
CSHNEG	Long-chain fatty acids	FA 13:0	Peak height	12530	C17076	CCCCCCCCCCCCC(=O)O	SZHOJFHSIKHZHA-UHFFFAOYSA-N	ONLI_0473	210729	146147	297984	146529	202840	195268	204319	460517	120070	199008	171546	238511	413986	184030	392431	209629	231264	165852	172223	214723	197451	158040	173919	172900	199539	222469	172804	185776	186420	220069	167823	111842	212454	188135	210167	236500	205937	289457	167175	225657	265253
CSHNEG	Long-chain fatty acids	FA 14:1	Peak height	5312400		CCCCCCCC/C=C\CCCC(=O)O	AFGUVBVUFZMJMX-KTKRTIGZSA-N	ONLI_0474	1859690	665435	1953634	1487144	2539054	1413977	1337223	2587542	275387	806460	1403685	756348	969124	1146164	697051	608141	986638	1623540	698603	2074035	1126066	1351172	1415294	962447	1673956	1815817	525449	1162927	1955609	816382	571222	294682	1380852	1145343	1795770	2051083	1674521	748105	465460	2305022	669672
CSHNEG	Long-chain fatty acids	FA 15:1	Peak height	6365140		CCCCC/C=C/CCCCCCCC(=O)O	DJCQJZKZUCHHAL-VOTSOKGWSA-N	ONLI_0475	201203	158688	942464	166018	307664	174009	174945	178824	164591	131222	163471	145231	184073	163873	198791	217851	245974	305960	160282	240178	189284	255422	192246	136963	260442	214316	141419	229342	337861	160811	197405	110999	253910	172219	204542	192882	188644	160669	174251	207804	120189
CSHNEG	Long-chain fatty acids	FA 15:0	Peak height	13849	C16537	CCCCCCCCCCCCCCC(=O)O	WQEPLUUGTLDZJY-UHFFFAOYSA-N	ONLI_0476	2131243	1488480	2989378	1536884	2120548	2177093	1750579	2478670	714704	1177044	1618199	1028665	1553260	1905473	1734544	1404278	1889551	2636522	1362690	1702824	1470966	1354967	1449406	1577246	1949842	2215320	1500261	1615297	1420122	1452878	1244599	923401	1589750	1006636	1611902	1861601	1607076	1679214	1380381	2333703	1263525
CSHNEG	Long-chain fatty acids	FA 16:1	Peak height	445638	C08362	CCCCCC/C=C\CCCCCCCC(=O)O	SECPZKHBENQXJG-FPLPWBNLSA-N	ONLI_0477	36554544	27764784	29225358	50049880	74204992	92471256	65775500	71389600	9202247	20147082	54789784	25536150	30352180	35798836	26217934	14595012	32972348	92211904	28818668	35724240	50330304	18009748	34978240	32061606	39100284	55495512	15894012	39697620	62445064	29105858	17299612	8852794	30434434	30352960	89910608	42661956	45717300	29900588	11719849	67825136	32152364
CSHNEG	Long-chain fatty acids	FA 17:0	Peak height	10465		CCCCCCCCCCCCCCCCC(=O)O	KEMQGTRYUADPNZ-UHFFFAOYSA-N	ONLI_0478	12877739	10106023	10028123	13226439	12222089	10642529	7862328	9192804	9693405	9729280	10159909	10533521	12963974	10775919	11013468	5917133	13306226	13222460	12370792	13633807	12426369	14423370	11751807	11415323	8354932	13211821	10128466	13111743	13927853	9710984	11095795	8595251	14503672	11018382	14079315	14733993	9448876	11216385	11809632	11908676	7849321
CSHNEG	Linoleic acids and derivatives	FA 18:3	Peak height	5280934	C06427	CC/C=C\C/C=C\C/C=C\CCCCCCCC(=O)O	DTOSIQBPPRVQHS-PDBXOOCHSA-N	ONLI_0479	24477446	17355208	14161468	23745102	42216776	41369360	28005430	38659648	14093975	19966702	24755804	16051682	27360148	19616822	23436470	25186180	31996236	42608848	19509162	39797948	25421378	27425102	29613342	22967236	42204316	39849124	20036252	30259250	35328740	29761424	20533082	14721227	33071926	17671198	37559124	39143860	25371104	31687770	23703454	41184520	14685587
CSHNEG	Linoleic acids and derivatives	FA 18:2	Peak height	5280644	C04056	CCCCCC/C=C/C=C\CCCCCCCC(=O)O	JBYXPOFIGCOSSB-GOJKSUSPSA-N	ONLI_0480	383269184	229709040	264081952	361681280	515677568	520485888	394194368	591245760	155815744	229494080	310447040	178675664	263876672	294266560	273386912	267677200	345671680	436317024	203898416	405390176	274661632	296228896	427213440	337562208	436101440	466927360	189437392	310809120	338219648	291256992	229049392	163463840	356564736	175368432	388621696	507388384	337457696	391796992	226530976	524716896	166798640
CSHNEG	Long-chain fatty acids	FA 18:1	Peak height	445639	C00712	CCCCCCCC/C=C\CCCCCCCC(=O)O	ZQPPMHVWECSIRJ-KTKRTIGZSA-N	ONLI_0481	273538880	197454944	244132960	351289888	367449472	441602304	303729408	489681920	112052800	161557312	247303008	173961632	199818384	265254560	215220688	149624272	226363952	340884576	172483344	243083680	244027152	190460976	293310912	249224368	299136960	351739680	114817400	227351248	251725856	227109280	182420128	98044912	277862560	172838944	349685856	414861216	279088928	288783296	110309712	443405568	161935328
CSHNEG	Long-chain fatty acids	FA 20:5	Peak height	446284	C06428	CC/C=C\C/C=C\C/C=C\C/C=C\C/C=C\CCCC(=O)O	JAZBEHYOTPTENJ-JLNKQSITSA-N	ONLI_0483	5785212	3524299	3950086	4657124	6841644	9789993	6691696	12644083	3319899	3437860	6444218	4549456	6524000	7640282	7676773	2847107	8323992	10014241	6150106	4635821	7574115	8608048	7032222	6133597	5210714	11157008	5326253	6277880	5435652	9520821	8832642	4103612	7178922	4559771	8720334	9415748	7527586	8204898	3349208	16693289	4729406
CSHNEG	Long-chain fatty acids	FA 20:4	Peak height	444899	C00219	CCCCC/C=C\C/C=C\C/C=C\C/C=C\CCCC(=O)O	YZXBAPSDXZZRGB-DOFZRALJSA-N	ONLI_0484	30683774	21586682	31609436	36472476	39724700	41705108	34584572	70658544	21489080	25619880	32568688	20522300	31367232	42741716	38309132	30229128	32226650	36704384	22533714	20994504	29529868	34524052	40558688	32969728	35103592	43146232	20388058	28198192	22975148	35830168	32969346	23320408	30233048	21949918	34455076	49543376	34815444	45826960	19009002	76905008	19748644
CSHNEG	Long-chain fatty acids	FA 20:3 a	Peak height	5312531	C21938	CCCCCCCC/C=C\C/C=C\C/C=C\CCCC(=O)O	UNSRRHDPHVZAHH-YOILPLPUSA-N	ONLI_0485	1122616	909611	1131161	1717727	1835923	1843362	1811468	2808468	931229	1312051	1583274	1556616	1886621	1738833	2746661	905828	2031595	2385029	1362025	841536	2163948	1428847	1099526	839433	1143000	1365838	961408	1343071	1173809	1686542	1812989	1112924	1489871	1518671	1502939	1682626	1135143	1494215	425745	2994988	1917614
CSHNEG	Long-chain fatty acids	FA 20:3 b	Peak height	5280581	C03242	CCCCC/C=C\C/C=C\C/C=C\CCCCCCC(=O)O	HOBAELRKJCKHQD-QNEBEIHSSA-N	ONLI_0486	6916214	4946194	4922410	5955644	10534834	11894229	8330146	10266274	2128943	3962526	6673367	5625682	6456486	7334820	5878589	3378529	7840122	9821254	4894260	6141654	7659589	6195909	7115170	5370134	5951272	7226384	4626765	7781192	5330565	6572014	5368138	2826696	6611946	4794532	7105676	9599706	6931556	7677804	2924704	10639314	4199205
CSHNEG	Long-chain fatty acids	FA 20:2	Peak height	6439848	C16525	CCCCC/C=C\C/C=C\CCCCCCCCCC(=O)O	XSXIVVZCUAHUJO-HZJYTTRNSA-N	ONLI_0487	4549812	2904905	2992188	4141971	6282446	6460434	4734330	5501148	1415322	2452612	3816963	3741878	3601668	3608345	3102884	1858522	4685670	5466765	2775424	4264725	3440209	3719284	3776489	2719852	4013894	3520069	2686696	4487460	2834068	3623589	2869767	1595669	4227985	2330383	4050206	4988348	3412989	3140377	1578564	4719724	2704594
CSHNEG	Long-chain fatty acids	FA 20:1	Peak height	5282768	C16526	CCCCCCCC/C=C\CCCCCCCCCC(=O)O	BITHHVVYSMSWAG-KTKRTIGZSA-N	ONLI_0488	23776838	14080528	7443936	10559963	36203220	26797068	20000554	15831646	3640444	9271465	22069516	18983228	14917816	7746739	11114310	4465630	21588858	25533676	15536907	29564582	18764240	8901905	11722015	7164337	9555339	18002190	10638620	18277086	15128922	6967426	7577181	3754292	26937554	13157184	14772909	11630440	8572695	11000478	7353818	12504011	15308972
CSHNEG	Long-chain fatty acids	FA 20:0	Peak height	10467	C06425	CCCCCCCCCCCCCCCCCCCC(=O)O	VKOBVWXKNCXXDE-UHFFFAOYSA-N	ONLI_0489	6940468	3980536	2680069	2565510	7487492	5380018	5797330	5873536	1878180	2793977	4738242	4270766	4234124	2699740	3689790	1979483	5680744	7986681	4161507	9196976	5231596	4973092	4831888	3168746	4406162	4209900	5225934	6973144	5142730	2278948	2627294	2154908	7779906	4214202	3556034	3576205	2783437	3221686	4104807	3492203	5373602
CSHNEG	Very long-chain fatty acids	FA 22:6	Peak height	445580	C06429	CC/C=C\C/C=C\C/C=C\C/C=C\C/C=C\C/C=C\CCC(=O)O	MBMBGCFOFBJSGT-KUBAVDMBSA-N	ONLI_0491	40103032	19528294	31530220	34902616	36855696	47427536	33783384	67698816	12025393	23461582	29862144	21680388	29800844	57778900	32903250	18361706	36092728	40554340	22552446	26957966	26351682	47948288	43829216	32944038	29118340	43092740	20759884	27402862	23547072	42252536	37235484	15168681	29710566	23287830	37961016	55182544	43266848	40941108	15559427	82561752	14361586
CSHNEG	Very long-chain fatty acids	FA 22:2	Peak height	5312554	C16533	CCCCC/C=C\C/C=C\CCCCCCCCCCCC(=O)O	HVGRZDASOHMCSK-HZJYTTRNSA-N	ONLI_0492	626244	508216	192355	219205	746644	616115	624239	297772	97729	171697	398852	562445	422271	164042	217008	169016	627526	844799	495333	981027	562503	288400	226784	204171	271599	221248	566256	924861	531515	173804	147877	101906	840592	332507	441334	361828	218349	139092	274888	254813	428019
CSHNEG	Very long-chain fatty acids	FA 22:1	Peak height	5281116	C08316	CCCCCCCC/C=C\CCCCCCCCCCCC(=O)O	DPUOLQHDNGRHBS-KTKRTIGZSA-N	ONLI_0493	6251692	6716835	4373436	4176914	7683074	5895395	4912905	4713546	3155428	3711130	5568719	6602896	5864452	3771761	5468679	3056560	7490950	7484020	5517036	11004964	9443158	4389378	4351410	3874885	3615396	5138495	6097214	7250375	10360017	5095379	4922604	3773810	10499295	5225468	5721088	4899542	8699873	6175930	4464986	4416079	5551142
CSHNEG	Very long-chain fatty acids	FA 22:0	Peak height	8215	C08281	CCCCCCCCCCCCCCCCCCCCCC(=O)O	UKMSUNONTOPOIO-UHFFFAOYSA-N	ONLI_0494	1516016	1073826	875782	814630	1773432	1426731	1192058	1177326	789750	1018943	1303331	947501	1113835	816267	1217166	915247	1723304	2039952	1162132	2321908	1351488	1150671	1993985	776372	1632232	1557764	1365331	1761850	1811349	836128	882751	1025172	2349631	1046221	893738	1315541	758597	1197029	1720518	1013395	1216910
CSHNEG	Very long-chain fatty acids	FA 24:1	Peak height	5281120	C08323	CCCCCCCC/C=C\CCCCCCCCCCCCCC(=O)O	GWHCXVQVJPWHRF-KTKRTIGZSA-N	ONLI_0495	1410530	916741	943685	1091350	1635750	826750	861247	916494	397549	694105	1221174	1005914	832974	601855	744656	531612	1270953	1550148	1054022	1944329	1087742	986494	989364	776253	933138	1370948	795687	1444310	1247605	498221	662985	532492	1655886	899616	876283	1248578	691131	677258	815486	780234	822945
CSHNEG	Very long-chain fatty acids	FA 24:0	Peak height	11197	C08320	CCCCCCCCCCCCCCCCCCCCCCCC(=O)O	QZZGJDVWLFXDLK-UHFFFAOYSA-N	ONLI_0496	2870175	1607381	2707942	1954069	2293838	1966903	1496846	2364194	1585095	2073251	1700812	1331024	1688353	2057074	2078843	1717158	2389256	2617596	1875653	2948306	2084672	2285562	2220411	1725350	4203960	2741009	2155916	2212862	2471782	1510754	2146412	1896893	2909688	1461023	1615925	2603933	1826329	2047769	2747596	2030486	1565616
CSHNEG	Medium-chain fatty acids	FAHFA 24:0; FAHFA 16:0/8:0;	Peak height	138184454		CCCCCCCCCCCCCCCC(=O)OC(CCC)CCCC(=O)O	JFADBWKNFGCNQI-UHFFFAOYSA-N	ONLI_0497	96483	99567	43525	122909	139414	117105	53064	74329	111854	118871	65284	81651	84114	97817	96031	80045	97574	94838	80623	73504	82302	62012	87607	89540	73144	63061	74129	200878	255587	48099	161800	207352	73667	124937	79978	127594	119927	131077	89870	105607	82747
CSHNEG	1-(1Z-alkenyl)-glycero-3-phosphoethanolamines	LPE P-16:0	Peak height	42607469		CCCCCCCCCCCCCC/C=C\OC[C@H](COP(=O)(O)OCCN)O	QYTPGOPLNFESQC-NUTQULCTSA-N	ONLI_0498	141964	130093	152633	168509	163288	173425	150859	160081	129313	150418	201226	184172	159522	175460	187675	128597	172693	228704	217656	217470	298905	164091	125687	127377	119424	148952	185023	181195	172091	162010	201288	153633	202973	233105	216051	145035	114985	170182	139709	131632	150779
CSHNEG	1-acyl-sn-glycero-3-phosphoethanolamines	LPE 20:4	Peak height	53480952		CC/C=C\C/C=C\C/C=C\C/C=C\CCCCCCC(=O)OC[C@H](COP(=O)(O)OCCN)O	JPNPIRVRGLGTRE-YSKCIPFOSA-N	ONLI_0503	9925804	6405558	8791653	14771079	11601126	15007505	8438117	20533844	9666522	13441992	16657162	9300492	16232498	11714111	27821082	5674891	16367317	22549890	13874381	12365563	30106300	18452690	13963706	9467661	9449895	13974994	11210998	14189453	14330125	13811975	20042870	11206248	14032359	12737468	10165120	14219068	8571063	15533336	7305971	23196290	12582104
CSHNEG	1-acyl-sn-glycero-3-phosphoethanolamines	LPE 22:6	Peak height	52925132		CC/C=C\C/C=C\C/C=C\C/C=C\C/C=C\C/C=C\CCC(=O)OC[C@H](COP(=O)(O)OCCN)O	XEVRBOQZSXWGQO-PAUXXPOVSA-N	ONLI_0504	5376979	2250480	4962668	6343966	4579168	7947588	3616793	9041169	2942908	5371614	8348625	4373608	7907307	4718648	11119080	1301044	8997227	11739848	6840030	5508422	16003895	6777778	6382891	3778257	3070321	6682320	4717238	7495144	7282986	4498418	10396543	3311838	7101056	7158948	7002372	6660979	3545907	5241960	2720186	9973443	4414295
CSHNEG	1-acyl-sn-glycero-3-phosphoethanolamines	LPE 22:5	Peak height	53480955		CC/C=C\C/C=C\C/C=C\C/C=C\C/C=C\CCCCCC(=O)OC[C@H](COP(=O)(O)OCCN)O	OSRWIBSZJTWIKA-SCFYABBUSA-N	ONLI_0505	426135	262321	217464	357421	541774	534377	388577	354175	308916	468250	657791	541411	745302	397663	1669851	40730	727789	1105472	629612	620997	1571877	303909	207093	124029	231594	185529	378410	556680	660891	289630	755900	232253	585157	574082	478463	254297	93539	250782	127909	566380	629123
CSHNEG	1-acyl-sn-glycero-3-phosphocholines	LPC 16:0	Peak height	460602	C04230	CCCCCCCCCCCCCCCC(=O)OC[C@H](COP(=O)([O-])OCC[N+](C)(C)C)O	ASWBNKHCZGQVJV-HSZRJFAPSA-N	ONLI_0509	95812704	84045152	79542672	89763632	95469480	96209632	86545624	96022560	75868168	83650952	88019136	102971400	99771800	81738152	124006344	72018128	110287632	126447464	117775896	96797096	142885392	90996816	99301768	89232664	86956264	91066248	101728560	103287080	126331240	91145944	107181744	86952896	117077456	118655240	127109456	87998920	85468816	98384664	95496000	94270912	109120296
CSHNEG	1-acyl-sn-glycero-3-phosphocholines	LPC 18:1	Peak height	53480465	C04230	CCCCCC/C=C\CCCCCCCCCC(=O)OC[C@H](COP(=O)([O-])OCC[N+](C)(C)C)O	PZRFVAHZNWPPAC-VBKSFVIKSA-N	ONLI_0511	804975	665795	873664	1126752	705619	1035717	1498767	1193924	725316	980848	989271	2662768	563562	703571	1099524	1443797	1029302	1226426	1215795	452605	1640068	541836	669036	721944	1042597	407670	1005708	543528	1403259	634793	920555	845311	1036450	1511693	1078964	403858	812787	566952	407323	452861	1708158
CSHNEG	1-acyl-sn-glycero-3-phosphocholines	LPC 17:0	Peak height	24779463	C04230	CCCCCCCCCCCCCCCCC(=O)OC[C@H](COP(=O)([O-])OCC[N+](C)(C)C)O	SRRQPVVYXBTRQK-XMMPIXPASA-N	ONLI_0512	25083448	20596110	21920548	24940790	21477968	22951176	21712808	22340410	20170006	23255942	18287760	22470898	22984924	22693574	26338644	19550396	24492556	23675988	24975576	23178720	24735870	22738164	24516016	24309220	21367296	22739252	24686596	22136052	23451916	21564876	24992276	21316666	26597348	25456854	27883718	23564194	22054116	20344682	23271044	22519144	22365144
CSHNEG	1-acyl-sn-glycero-3-phosphocholines	LPC 18:3	Peak height	5313992		CC/C=C\C/C=C\C/C=C\CCCCCCCC(=O)OC[C@H](COP(=O)(O)OCC[N+](C)(C)C)O	WKQNRCYKYCKESD-YVHLTTHBSA-O	ONLI_0513	662496	471582	418431	552471	671221	476318	549096	635664	392163	527196	653957	658382	622096	435086	936919	408144	657719	927780	828643	837782	845817	464132	635501	479832	562439	567738	622620	661894	826651	509921	809242	556322	733483	726262	566874	610489	538431	465350	416569	457169	680366
CSHNEG	1-acyl-sn-glycero-3-phosphocholines	LPC 18:0	Peak height	497299		CCCCCCCCCCCCCCCCCC(=O)OC[C@H](COP(=O)([O-])OCC[N+](C)(C)C)O	IHNKQIMGVNPMTC-RUZDIDTESA-N	ONLI_0516	46529912	36073940	50952880	55382488	44638520	44986768	41899888	58407488	42282852	49044784	39026256	44315728	49483184	50813284	61808496	43089140	47320528	53091212	48206768	42636652	62911256	53810004	58943444	55729600	50094656	60467724	47908008	51289840	54820660	56477384	64082240	52640080	60366172	61519696	60920352	57692948	54521984	61527384	44926072	64588488	49896688
CSHNEG	1-acyl-sn-glycerol-3-phosphoinositols	LPI 18:2	Peak height	52928605		CCCCC/C=C\C/C=C\CCCCCCCC(=O)OC[C@H](COP(=O)(O)OC1C([C@@H](C(C(C1O)O)O)O)O)O	SAHCQBPGXQFTRA-FPKLTXOWSA-N	ONLI_0518	53922	54018	49508	92780	72930	75665	67147	113301	98601	106571	64231	100077	124695	57744	194213	67761	96454	126170	75913	109076	137221	135788	114723	82901	118154	92710	83770	122518	110008	87913	119693	105175	82189	77561	48597	79482	61411	63734	74226	136237	94404
CSHNEG	1-acyl-sn-glycerol-3-phosphoinositols	LPI 18:0	Peak height	42607495		CCCCCCCCCCCCCCCCCC(=O)OC[C@H](COP(=O)(O)OC1C([C@@H](C(C(C1O)O)O)O)O)O	MXAFDFDAIFZFET-DRPMWXDOSA-N	ONLI_0521	145044	80410	130868	146945	127647	149125	315425	149666	109127	144372	243153	103508	112099	108913	148575	168023	144453	185288	153963	142444	230923	149135	145929	179559	190213	158938	148835	132143	243926	130281	165389	156598	118993	301911	170894	129787	179739	119182	173539	147813	336143
CSHNEG	1-acyl-sn-glycero-3-phosphocholines	LPC 20:5	Peak height	11757087		CC/C=C\C/C=C\C/C=C\C/C=C\C/C=C\CCCC(=O)OC[C@H](COP(=O)([O-])OCC[N+](C)(C)C)O	PDIGSOAOQOXRDU-WJPZTBRDSA-N	ONLI_0522	228507	178425	245453	362583	351676	375147	338093	659856	334651	371210	410941	565328	488667	456001	852421	266477	409670	631435	831546	331308	835166	558299	442333	364822	392805	569709	342023	384423	587624	605846	787389	506817	475878	878192	396700	519607	472066	466037	230975	504531	701606
CSHNEG	1-acyl-sn-glycero-3-phosphocholines	LPC 20:3 a	Peak height	52924055		CCCCC/C=C\C/C=C\C/C=C\CCCCCCC(=O)OC[C@H](COP(=O)([O-])OCC[N+](C)(C)C)O	BBNHCUBQEQJHIG-FZZJNMCHSA-N	ONLI_0524	2111139	2307780	2260774	2890648	3529076	3407278	2566888	3348190	1218663	2344389	3877563	3809705	3751638	2715592	3962682	1519116	3676616	4613614	4143877	2552606	7978046	2771162	2167062	2066364	2277911	1948612	2092288	4395444	4336484	2849714	3153071	2459729	3186166	6053232	3405572	2405854	2422842	2561734	1908442	2857554	4191534
CSHNEG	1-acyl-sn-glycerol-3-phosphoinositols	LPI 20:4	Peak height	42607497		CCCCC/C=C\C/C=C\C/C=C\C/C=C\CCCC(=O)OC[C@H](COP(=O)(O)OC1C([C@@H](C(C(C1O)O)O)O)O)O	LXUGKKVCSTYZFK-YPTWYXPQSA-N	ONLI_0529	201476	128472	328811	466424	261528	371769	232484	644295	353683	305750	331603	222931	409696	475082	733260	185003	290602	412290	274441	268376	493109	407274	360589	304144	291210	508845	192983	339224	330946	419017	583631	338905	180318	308026	247799	432477	232349	381843	223384	908748	274574
CSHNEG	Long-chain ceramides	Cer-NS d36:1; Cer-NS d18:1/18:0;	Peak height	5283565		CCCCCCCCCCCCCCCCCC(=O)N[C@@H](CO)[C@@H](/C=C/CCCCCCCCCCCCC)O	VODZWWMEJITOND-NXCSZAMKSA-N	ONLI_0530	75326	65202	164182	231702	89569	74825	66933	193655	125392	109510	72857	58115	91294	147169	113909	67415	87476	96073	100028	82579	85408	116050	197848	159420	110083	344971	67671	109745	93758	146511	196701	98604	78003	83579	110055	295037	187605	212924	92647	197202	91668
CSHNEG	1-acyl-sn-glycero-3-phosphocholines	LPC 22:5 a	Peak height	53480473		CCCCC/C=C\C/C=C\C/C=C\C/C=C\C/C=C\CCC(=O)OC[C@H](COP(=O)([O-])OCC[N+](C)(C)C)O	YBUXFQUGNPBZPS-YNBHEIDWSA-N	ONLI_0531	263249	264080	241050	296866	509082	433293	427181	437988	129029	309599	621014	572940	582776	313530	611684	213795	505628	654341	650083	449021	897810	352406	256499	263412	279456	316337	342851	543698	598786	351126	506788	281875	479809	639067	428006	319884	281241	271513	255854	310484	553230
CSHNEG	Ceramides	Cer (d18:1(4E)/22:0)	Peak height	5283567	C00195	CCCCCCCCCCCCCCCCCCCCCC(=O)N[C@@H](CO)[C@@H](/C=C/CCCCCCCCCCCCC)O	KEPQASGDXIEOIL-GLQCRSEXSA-N	ONLI_0535	775116	430926	218394	296846	459498	634036	668753	295098	255673	225932	701886	786883	513365	154148	328883	119106	809125	1082683	725560	568130	1201027	199022	282493	157737	171660	211920	894616	774859	1519160	182107	377739	208965	1167850	1012319	1722212	252688	214906	191762	420380	175641	684129
CSHNEG	Long-chain ceramides	Cer-NS d40:2; Cer-NS d18:2/22:0;	Peak height	52931120		CCCCCCCCCCCCCCCCCCCC(=O)N[C@@H](CO)[C@@H](/C=C/CCCCCCCC/C=C\CCC)O	FNIDWIWVIDQZRV-FDPIOYFLSA-N	ONLI_0536	129646	120415	26562	31098	193388	225892	168489	38356	28253	31323	195141	229024	187681	33972	63987	0	203030	274446	227621	201499	404162	28966	36905	19167	0	74530	202801	308086	377772	64800	64060	28838	261053	272492	340545	33722	30615	33885	136623	25449	212102
CSHNEG	Ceramides	Cer (d18:1(4E)/23:0)	Peak height	52931115		CCCCCCCCCCCCCCCCCCCCCCC(=O)N[C@@H](CO)[C@@H](/C=C/CCCCCCCCCCCCC)O	NAJHAHQNQCNWOP-PUYNVXOJSA-N	ONLI_0537	275520	167437	244966	300344	232973	229324	215271	281847	229110	225684	210687	263988	153936	170567	399111	128722	256527	334746	278482	240288	279495	246110	322890	168760	162272	218023	269571	221383	313109	224539	393714	173261	295654	191925	353288	243574	189831	258288	159946	172635	191390
CSHNEG	Ceramides	Cer-NS d41:2; Cer-NS d18:2/23:0;	Peak height	52931124		CCCCCCCCCCCCCCCCCCCCCCC(=O)N[C@@H](CO)[C@@H](/C=C/CCCCCCCC/C=C\CCC)O	ZMECGTOWDUDJOX-YOFLLLADSA-N	ONLI_0538	49041	83798	67820	88026	116747	72076	86100	51992	28165	32793	96705	101832	124088	32752	75534	26670	104361	107120	110766	92907	144191	65707	58905	22880	0	71863	70915	163660	125105	67210	91859	27523	90090	125158	128764	75105	35950	36638	76167	35614	77160
CSHNEG	Phosphatidylcholines	PC 25:0; PC 12:0-13:0;	Peak height	24778516		CCCCCCCCCCCCC(=O)O[C@H](COC(=O)CCCCCCCCCCC)COP(=O)([O-])OCC[N+](C)(C)C	FCTBVSCBBWKZML-WJOKGBTCSA-N	ONLI_0539	997512	817142	815278	1051042	848089	866555	965517	955174	786643	882246	850689	870660	1016276	964011	1021805	750140	946962	898548	956874	988358	1094932	1042674	964588	932189	817599	957674	979599	937931	988105	853397	921130	845273	1140878	1041376	1167288	982401	877660	931349	1057301	925993	920599
CSHNEG	Ceramides	Cer-NDS d41:0; Cer-NDS d18:0/23:0;	Peak height	53481049		CCCCCCCCCCCCCCCCCCCCCCC(=O)N[C@@H](CO)[C@@H](CCCCCCCCCCCCCCC)O	FTSDYFFYZJTACJ-IOLBBIBUSA-N	ONLI_0541	74843	129784	69944	116431	162266	82672	78130	112470	284191	156194	33283	138548	260362	68854	226959	185410	90957	132132	158186	352153	255525	325755	138372	93819	304086	138597	231724	292124	389014	137810	234439	256602	255652	265330	130532	130608	110662	190893	329272	100623	193936
CSHNEG	Phytoceramides	Cer-NP t40:0; Cer-NP t18:0/22:0;	Peak height	5322153		CCCCCCCCCCCCCCCCCCCCCC(=O)N[C@@H](CO)[C@@H]([C@@H](CCCCCCCCCCCCCC)O)O	CIMNZQFRNXDRER-HIERITDVSA-N	ONLI_0542	126580	131002	96113	136003	225691	156284	80587	131681	199028	146229	107344	168704	231491	61287	177612	104196	166903	240349	226206	219181	275601	212637	165094	93442	161727	129339	236683	252911	312151	161284	180418	201964	282952	301451	175715	138566	87646	142514	242007	101565	217070
CSHNEG	Ceramides	Cer-NS d42:3; Cer-NS d18:2/24:1;	Peak height	NA		0	0	ONLI_0543	170644	152907	176310	268100	289696	324296	147023	203416	135361	161187	237578	240783	279580	132770	286992	86397	305050	306434	243953	241320	278624	220247	196545	162153	138432	248461	176016	331506	275188	173942	227692	145532	236083	210379	378616	272666	166715	148828	168957	172010	186854
CSHNEG	Ceramides	Cer-NS d42:2; Cer-NS d18:1/24:1;	Peak height	5283568		CCCCCCCCCCCCC/C=C/[C@H]([C@H](CO)NC(=O)CCCCCCCCCCCCC/C=C\CCCCCCCC)O	VJSBNBBOSZJDKB-KPEYJIHVSA-N	ONLI_0545	1182701	1194619	1221506	1593200	1821558	1464571	1189308	1270127	864262	1059981	1313348	1388802	1618952	861866	1568392	521042	1618727	1910598	1537985	1560704	2186105	1283301	1088402	990918	728611	1430499	1097233	2146110	2006162	854949	1337924	843633	1595524	1567103	2433670	1871790	1058710	1046147	1015126	1119846	1048474
CSHNEG	Phosphatidylethanolamines	PE 34:3; PE 16:0-18:3;	Peak height	9546746		CCCCCCCCCCCCCCCC(=O)OC[C@H](COP(=O)(O)OCCN)OC(=O)CCCCCCC/C=C\C/C=C\C/C=C\CC	QONZHKTZKTUIMU-WSQRTPJYSA-N	ONLI_0546	421893	351392	62256	77437	600810	180577	265418	62659	253451	155248	289275	539995	431560	40070	265415	77867	550128	1019748	665908	976962	622192	208931	242354	0	61901	194846	911791	387222	1215955	153839	290404	150194	866270	616089	444674	208905	26617	168827	277601	36502	619050
CSHNEG	Phosphatidylethanolamines	PE 34:1; PE 16:0-18:1;	Peak height	5283496	C13877	CCCCCCCCCCCCCCCC(=O)OC[C@H](COP(=O)(O)OCCN)OC(=O)CCCCCCC/C=C\CCCCCCCC	FHQVHHIBKUMWTI-OTMQOFQLSA-N	ONLI_0547	396363	574455	147381	276394	916455	355169	461608	225557	400653	299474	308290	682090	777194	179162	381567	283691	470549	926086	792929	813819	1137609	315568	245588	188454	272381	205180	719644	701208	1534956	323923	302032	280658	953531	968335	505014	242566	155231	205915	552383	178869	1140590
CSHNEG	Phosphatidylethanolamines	PE 36:6e; PE 16:1e/20:5;	Peak height	52924236		CCCCCC/C=C\CCCCCCCC(=O)OC[C@H](COP(=O)(O)OCCN)OC(=O)CCC/C=C\C/C=C\C/C=C\C/C=C\C/C=C\CC	LEBOQMHVVYOZDX-AFHBIVKPSA-N	ONLI_0548	79723	47896	34892	0	95852	47862	40695	37064	31171	50372	31880	167247	57682	36142	43501	0	63181	152766	99491	88634	196796	46070	31166	45095	34966	71536	90227	64717	89793	35280	42243	71503	101396	106000	192591	50413	30336	84049	110889	41167	46046
CSHNEG	Ceramides	Cer-NS d43:1; Cer-NS d19:1/24:0;	Peak height	134745021		CCCCCCCCCCCCCCCCCCCCCCCC(=O)N[C@@H](CO)[C@@H](/C=C/CCCCCCCCCCCCCC)O	KSYIVRBEJSMJMX-PVNBSDFKSA-N	ONLI_0549	91358	43546	36018	110375	34480	26463	29145	88327	91968	42638	27369	32538	38993	31709	133020	32987	37744	101345	75198	92293	75246	127126	123813	75564	101158	97255	70745	31927	85165	47015	109748	98081	46595	29357	70735	90862	44103	78300	28355	32406	41770
CSHNEG	Ceramides	PE 36:4e; PE 18:2e/18:2;	Peak height	NA		0	0	ONLI_0550	358156	350370	199095	355164	403502	283407	279719	210309	261584	273986	268186	530562	591624	271300	167207	177112	397158	759767	541028	689405	568753	539374	272299	355928	187731	297121	490972	489374	1060261	323918	283504	564282	497804	295750	367189	275260	241436	292733	390503	192641	552146
CSHNEG	Phytoceramides	Cer-NP t42:0; Cer-NP t18:0/24:0;	Peak height	129678169		[2H]CCCCCCCCCCCCCCCCCCCCCCCC(=O)N[C@@H](CO)[C@@H]([C@@H](CCCCCCCCCCCCCC)O)O	ZESJDNWGTANZCC-UHYFRKBVSA-N	ONLI_0551	157711	169180	116859	190782	229372	169722	125821	161811	252747	233721	150741	305997	318638	87739	249017	135516	248127	267625	327101	284845	345105	284127	206089	124812	229540	173713	233173	258342	448725	214329	317416	263464	281131	397786	194726	195640	133508	265218	311769	149393	325016
CSHNEG	1-alkyl,2-acylglycerophosphoethanolamines	PE 36:2e; PE 18:1e/18:1;	Peak height	138160177		CCCCCCCC/C=C\CCCCCCCCOCC(COP(=O)(O)OCCN)OC(=O)CCCCCCC/C=C\CCCCCCCC	GHNXVMPBTBKJRP-CLFAGFIQSA-N	ONLI_0552	87965	88313	123161	86679	96068	69439	83746	64113	61190	79094	55052	93996	103347	67620	77466	75638	83574	103872	90567	90123	148708	91771	69736	73147	67655	81495	99699	77974	90475	65729	55489	81069	118025	99820	99077	35095	69300	82064	87604	34042	92155
CSHNEG	Phytoceramides	HexCer-AP t34:0; HexCer-AP t18:0/16:0;	Peak height	70678878		CCCCCCCCCCCCCC[C@H]([C@H]([C@H](CO)NC(=O)C(CCCCCCCCCCCCCC)O)O)O	RHIXBFQKTNYVCX-KHDKDNTOSA-N	ONLI_0554	158474	135828	176404	195439	229021	226818	42025	179479	217387	180500	133636	204295	186202	139513	203538	112833	247911	247498	229421	227938	291470	207454	252278	199588	129455	201369	228261	196841	244533	185466	190018	136862	289047	235155	255244	158003	162041	192759	270276	174253	133873
CSHNEG	Sphingomyelins	SM d32:1; SM d16:1/16:0;	Peak height	52931133		CCCCCCCCCCCCCCCC(=O)N[C@@H](COP(=O)([O-])OCC[N+](C)(C)C)[C@@H](/C=C/CCCCCCCCCCC)O	RPTUKVYGSPDHGQ-PSALXKTOSA-N	ONLI_0555	197040	217413	304915	335851	275295	285233	204314	346330	266064	310541	305268	208024	264093	362845	348093	335895	246080	263830	246292	189962	371937	323607	296673	277482	319457	370756	201380	256222	254146	388545	326069	287606	273395	260950	321546	303172	330568	395933	332232	369529	285088
CSHNEG	Phosphatidylethanolamines	PE 36:4; PE 16:0-20:4;	Peak height	53479588	C00350	CCCCCCCCCCCCCCCC(=O)OC[C@H](COP(=O)(O)OCCN)OC(=O)CCCCCC/C=C\C/C=C\C/C=C\C/C=C\CC	NQIMLWFRWGTTOZ-JGGKAAGMSA-N	ONLI_0556	7898238	1668912	1819922	3202029	5008988	5715662	8863759	1617127	3108211	3136330	6865078	3138195	7010870	775322	4861338	2782817	10136640	15497848	10828240	8514068	15511089	3413649	3395711	802554	2865588	2497643	6857468	7029462	17261200	1165341	5479711	1293038	13075678	8762665	9935334	2676534	1123469	1051155	4061598	1181152	10457458
CSHNEG	Phosphatidylethanolamines	PE 36:3	Peak height	52924364	C00350	CCCCCCCC/C=C\CCCCCCCC(=O)O[C@H](COC(=O)CCCCCCC/C=C\C/C=C\CCCCC)COP(=O)(O)OCCN	DOILLFCKSSPXMF-ZKZIFNJMSA-N	ONLI_0557	2075242	1681547	622611	1113834	2398620	1756983	978051	742790	933201	1103813	1400604	2458417	2530204	563226	1040195	814892	2677182	3051072	2435982	3068410	3980024	1386074	1014726	641012	863581	924346	2656040	2403382	4209883	794025	1034999	838094	3981352	3105512	1648619	913550	444907	591097	2149628	381171	1932927
CSHNEG	Phosphatidylethanolamines	PE 36:2; PE 18:0-18:2;	Peak height	9546749	C00350	CCCCCCCCCCCCCCCCCC(=O)OC[C@H](COP(=O)(O)OCCN)OC(=O)CCCCCCC/C=C\C/C=C\CCCCC	YDTWOEYVDRKKCR-KNERPIHHSA-N	ONLI_0559	3807595	3830357	1423998	2259875	4654514	2670269	2567699	1701575	2751374	2588003	2600432	5252347	4878026	1126608	3313424	2747290	5159801	5922948	5795440	6584752	6873494	3291735	2972658	2018109	3089172	2398662	7266498	4963652	8163934	2214695	3387575	3164471	7959960	6567604	2982015	2455592	1396858	1957922	5636618	1051037	5857964
CSHNEG	Phosphatidylethanolamines	PE 36:1; PE 18:0-18:1;	Peak height	9546742		CCCCCCCCCCCCCCCCCC(=O)OC[C@H](COP(=O)(O)OCCN)OC(=O)CCCCCCC/C=C\CCCCCCCC	JQKOHRZNEOQNJE-DJEJVYNPSA-N	ONLI_0560	252042	383598	118160	210952	405444	252784	212466	167422	273241	277150	182205	512413	396006	99926	278487	248433	333898	402626	435756	506589	493618	217312	235056	165281	231589	131510	487174	280943	667608	151478	287731	220966	602770	623893	230645	175531	117866	166337	400095	93365	459192
CSHNEG	1-(1Z-alkenyl),2-acylglycerophosphoethanolamines	PE 38:7e; PE 16:1e/22:6; [M-H]-	Peak height	5283497	C00350	CCCCCCCCCCCCCC/C=C\OC[C@H](COP(=O)(O)OCCN)OC(=O)CC/C=C\C/C=C\C/C=C\C/C=C\C/C=C\C/C=C\CC	WVGALBKSWOUIEZ-XNHMFJFDSA-N	ONLI_0562	3523876	2598641	2500204	2479879	3612959	3337464	2399658	2153773	2404242	2220905	2517639	3145758	3761418	2016525	2429329	1541729	3619190	4471240	4454424	4009303	5174928	2411885	2639635	2441532	1862256	2766721	3851366	3883276	5176800	1971297	2717604	2350074	4764912	4572755	4634645	2496014	2153674	2757357	4966017	2164260	2658404
CSHNEG	Sphingomyelins	SM d33:1; SM d17:1/16:0;	Peak height	52931137		CCCCCCCCCCCCCCCCC(=O)N[C@@H](COP(=O)([O-])OCC[N+](C)(C)C)[C@@H](/C=C/CCCCCCCCCCC)O	CGMZWBZSOINWHL-YPDYIYJKSA-N	ONLI_0563	806150	731739	1193573	1376880	983622	1010331	732745	1098994	1046825	957594	964694	683514	897511	1397085	1387769	1065484	812787	873611	1031442	784331	1237039	1298121	1214374	1126838	1207566	1272190	831626	1022918	869590	1317258	1111849	940390	937286	921972	848072	1020252	1077496	1172373	1090535	1069673	981909
CSHNEG	1-alkyl,2-acylglycerophosphoethanolamines	PE 38:6e; PE 18:1e/20:5;	Peak height	138287875		CCCCCCCC/C=C\CCCCCCCCOCC(COP(=O)(O)OCCN)OC(=O)CCC/C=C\C/C=C\C/C=C\C/C=C\C/C=C\CC	WHKDVYYCCUAIBY-QSOAFSPRSA-N	ONLI_0564	174551	203878	160795	189030	326782	207498	221019	183285	121197	159260	179714	177705	231184	170166	158641	130943	200814	232666	210344	296067	302980	158550	130900	149541	138220	194356	136577	207199	216220	173281	174945	163220	249735	201104	364834	227872	205904	219405	229398	179272	145672
CSHNEG	1-alkyl,2-acylglycerophosphoethanolamines	PE 38:6e; PE 18:2e/20:4;	Peak height	138243517		CCCCC/C=C\C/C=C\CCCCCCCCOCC(COP(=O)(O)OCCN)OC(=O)CCCCCC/C=C\C/C=C\C/C=C\C/C=C\CC	QGMRGDWLZOYPFY-YUPWHRRNSA-N	ONLI_0565	993431	742748	586678	564963	1241818	794714	697639	567763	480775	414608	602326	1151351	964575	555137	536342	530015	1039560	1119031	1511071	1218191	1246131	705483	549596	506242	458282	652398	1450310	1061818	1540181	485536	710723	545844	1469331	1644786	1357077	696953	489088	659941	1632212	629657	597085
CSHNEG	Phosphatidylcholines	PC 30:0; PC 14:0-16:0;	Peak height	129657	C00157	CCCCCCCCCCCCCCCC(=O)O[C@H](COC(=O)CCCCCCCCCCCCC)COP(=O)([O-])OCC[N+](C)(C)C	RFVFQQWKPSOBED-PSXMRANNSA-N	ONLI_0566	269310	515018	439179	624310	660325	246099	590143	444788	588505	638277	304063	279385	385555	500500	672430	873060	244408	245703	490392	596156	349907	649733	627203	843704	980028	756675	579741	282557	232343	739957	595176	1100483	201203	372450	270814	452535	921874	892143	1076601	413971	920924
CSHNEG	1-alkyl,2-acylglycerophosphoethanolamines	PE 38:4e; PE 18:0e/20:4;	Peak height	52925027		CCCCCCCCCCCCCCCCCCOC[C@H](COP(=O)(O)OCCN)OC(=O)CCC/C=C\C/C=C\C/C=C\C/C=C\CCCCC	LRBBGQHIVCMVRY-PQNGYSQDSA-N	ONLI_0567	882476	1033323	976426	942570	1288649	1124143	741195	1208866	1340145	1062685	804603	1322766	1602496	932285	1037368	1105083	1143995	1279419	1542130	1051424	1767201	1250488	1213765	1270580	1067937	1245039	1231470	1112015	1242292	1159046	1406171	1271388	1322455	1489065	1304898	1053027	1240528	1339108	1796137	981696	1193831
CSHNEG	Glycosyl-N-acylsphingosines	HexCer-NS d34:1; HexCer-NS d18:1/16:0;	Peak height	134853938		CCCCCCCCCCCCCCCC(=O)N[C@@H](CO[C@H]1C(C([C@H](C(O1)CO)O)O)O)[C@@H](/C=C/CCCCCCCCCCCCC)O	VJLLLMIZEJJZTE-JRIZINFMSA-N	ONLI_0568	317512	264960	1038939	553771	449550	287870	298667	737271	658223	544125	338581	388238	379133	731706	732527	380178	266177	341085	374482	430922	565547	937253	772095	985194	534996	1187736	277588	478998	318008	761235	543909	610806	346051	422690	305771	1030588	779500	976993	433295	711594	321307
CSHNEG	Sphingomyelins	SM d34:2; SM d18:2/16:0;	Peak height	52931235		CCCCCCCCCCCCCCCC(=O)N[C@@H](COP(=O)([O-])OCC[N+](C)(C)C)[C@@H](/C=C/CCCCCCCC/C=C\CCC)O	YLWSJLLZUHSIEA-CKSUKHGVSA-N	ONLI_0569	2247399	2198604	1789362	1728866	2574684	2683372	2321484	1736781	1387446	1540052	2549587	2509042	2594546	2167057	2453630	1573212	2811263	2953449	2798997	3077617	3831268	1769883	1914072	1951418	1772358	2349151	2619242	2807234	3385799	1817917	2058588	1635928	3348161	2976997	3805348	1799104	1819672	2027331	2963296	2044198	2614844
CSHNEG	Phosphosphingolipids	SM d34:1	Peak height	9939941		CCCCCCCCCCCCCCCC(=O)N[C@@H](COP(=O)([O-])OCC[N+](C)(C)C)[C@@H](/C=C/CCCCCCCCCCCCC)O	RWKUXQNLWDTSLO-GWQJGLRPSA-N	ONLI_0570	8339227	8059108	13180529	11751177	9333313	10506704	9182062	12799825	10720148	11136994	9370614	8171446	10259209	13373431	14631680	11380300	10236820	11814422	10723360	10631717	12715889	12219244	13046935	13462826	11345243	14479156	10342478	9309635	9980586	11382414	12809437	11236806	11570807	9589730	11870862	11667875	12527021	13359139	11751977	12722229	9299711
CSHNEG	Phosphatidylethanolamines	PE 38:6; PE 16:0-22:6;	Peak height	9546799		CCCCCCCCCCCCCCCC(=O)OC[C@H](COP(=O)(O)OCCN)OC(=O)CC/C=C\C/C=C\C/C=C\C/C=C\C/C=C\C/C=C\CC	MPWUZHVZZKSTPV-MADBQMNMSA-N	ONLI_0571	6475636	5292407	3108964	3440037	8769836	7140756	5028450	2773397	2923727	3083155	6588283	8226852	8045788	3481318	3551712	1788683	9565895	11178529	8360627	7614692	10718321	3770586	3555403	2894980	2691227	4439189	8163888	8598171	11310433	3353499	5016460	2483996	9681948	9096427	9196896	4154251	2684712	2944076	4515276	2122470	5767540
CSHNEG	Phosphatidylethanolamines	PE 38:5; PE 18:1-20:4;	Peak height	53479651	C00350	CCCCCCCC/C=C\CCCCCCCC(=O)OC[C@H](COP(=O)(O)OCCN)OC(=O)CCCCCC/C=C\C/C=C\C/C=C\C/C=C\CC	ZYMZKMQPPJPQHY-COHGUQLJSA-N	ONLI_0572	3103270	2410209	1308494	2290826	4245624	3274213	1187883	1321249	1466629	1568211	3114830	3370612	3606252	1568842	1461449	321214	4334694	4556340	3589248	3287459	5445642	1911034	1492521	853496	656298	1294184	3047172	3613956	4917442	1328428	1726760	827740	4569714	3683691	3401780	1431296	833902	883931	2287710	1020199	1522041
CSHNEG	1-(1Z-alkenyl),2-acylglycerophosphoethanolamines	PE18:1e/18-HETE	Peak height	134718784		CCCCCCCCCCCCCCCC/C=C\OCC(COP(=O)(O)OCCN)OC(=O)CCC/C=C\C/C=C\C/C=C\C/C=C\CCC(CC)O	ANCAYQLYUYMKFT-GZPCIZTNSA-N	ONLI_0573	168606	172884	92390	98866	164886	134135	92419	115078	183095	106388	88630	164175	201115	75293	124737	133379	109277	244064	174444	201212	190840	121862	121111	122381	140187	81391	270723	178996	197545	166339	98420	165230	237589	210268	167434	113093	42127	109302	195754	78308	166958
CSHNEG	Phosphatidylethanolamines	PE 38:4; PE 18:0-20:4;	Peak height	53479610	C00350	CCCCCCCCCCCCCCCCCC(=O)OC[C@H](COP(=O)(O)OCCN)OC(=O)CCCCCC/C=C\C/C=C\C/C=C\C/C=C\CC	YEHAZLUVAZKVRO-PDWSRYNESA-N	ONLI_0574	7982129	7029295	4013272	4841418	10120422	6717218	7123264	4169010	4748030	4981861	6622170	7391514	9444674	4446746	5066781	3309240	8769803	11450961	9372368	10661878	14099752	6991089	5633786	4904284	4294016	6869518	10096484	10235212	11952253	5107664	7593740	5363292	13709291	10427699	9523724	7192721	4285601	5554748	9088117	3579850	7512370
CSHNEG	1-alkyl,2-acylglycerophosphoethanolamines	PE 40:8e; PE 18:2e/22:6;	Peak height	138283942		CCCCC/C=C\C/C=C\CCCCCCCCOCC(COP(=O)(O)OCCN)OC(=O)CC/C=C\C/C=C\C/C=C\C/C=C\C/C=C\C/C=C\CC	VVEHXBSUSFPSAC-OJMLKDQNSA-N	ONLI_0575	482535	517632	556711	705974	709609	768245	423142	521956	462110	440672	577203	695722	955262	466215	557776	311550	862604	1071261	831446	656211	1144854	600515	482374	412307	317142	578570	544648	768490	1062126	365311	644445	459210	957653	798512	929979	487601	381415	513032	702481	488002	436176
CSHNEG	Phosphosphingolipids	SM d35:1; SM d18:1/17:0;	Peak height	46891763		CCCCCCCCCCCCCCCCC(=O)N[C@@H](COP(=O)([O-])OCC[N+](C)(C)C)[C@@H](/C=C/CCCCCCCCCCCCC)O	YMQZQHIESOAPQH-JXGHDCMNSA-N	ONLI_0576	1060853	930385	1112173	1406953	815426	1075522	939678	1282744	1124225	1072517	924022	1041916	1003883	1288711	1218969	1109479	1150953	1062491	885556	983080	919569	1172394	1381922	1320618	1094337	1213418	913558	955655	883019	1055040	1300037	984190	772439	939607	1270791	1217238	1028697	979843	957857	1304907	777944
CSHNEG	1-alkyl,2-acylglycerophosphoethanolamines	PE 40:6e; PE 18:0e/22:6;	Peak height	52923729		CCCCCCCCCCCCCCCCCCOC[C@H](COP(=O)(O)OCCN)OC(=O)CC/C=C\C/C=C\C/C=C\C/C=C\C/C=C\C/C=C\CC	CFLIAMAPAOTPGM-AOXDHDBISA-N	ONLI_0577	1800548	1555452	1640296	1488193	1808883	1756383	1278822	1776327	1668044	1675980	1250550	1729532	2074646	1212049	1540619	1616512	1633732	1870118	2032498	1595633	2058442	1791073	2190270	2055215	1753624	2022238	2007222	1514645	2185658	1472295	2094305	1850736	2238167	2136884	2005237	1646269	1637768	1931060	2538532	1426422	1456158
CSHNEG	1-alkyl,2-acylglycero-3-phosphocholines	PC 32:1e; PC 16:1e/16:0;	Peak height	6913608		CCCCCCCCCCCCCCCC(=O)O[C@H](COCCCCCCCC/C=C\CCCCCC)COP(=O)(O)OCC[N+](C)(C)C	BXQUYBIIGCTQFV-MGIDVFSBSA-O	ONLI_0578	42535	81922	96372	82967	79670	87245	71918	63819	78708	39525	95328	42227	45065	101071	64481	96432	41650	76235	70529	120912	85505	90207	121443	86054	83950	122468	78973	113919	87990	32599	36468	93878	90840	41901	88474	65901	72075	102043	90523	37066	37519
CSHNEG	Phosphatidylglycerols	PG 36:0; PG 17:0-19:0;	Peak height	52926502		CCCCCCCCCCCCCCCCCCC(=O)O[C@H](COC(=O)CCCCCCCCCCCCCCCC)COP(=O)(O)OC[C@H](CO)O	VRXBINAFDUHENA-IOLBBIBUSA-N	ONLI_0579	560787	327182	410914	520576	410513	358310	466570	433751	393902	356032	414732	350221	434780	380511	436988	287460	479139	486743	447861	520441	454623	462072	419250	374977	405277	455734	405242	502347	411827	449966	509423	387986	576615	420853	575100	589602	440841	408273	477411	537170	590993
CSHNEG	1-(1Z-alkenyl),2-acylglycerophosphoethanolamines	PE 40:5e; PE 18:0e/22:5;	Peak height	53480858		CCCCCCCCCCCCCCCC/C=C\OC[C@H](COP(=O)(O)OCCN)OC(=O)CCCCC/C=C\C/C=C\C/C=C\C/C=C\C/C=C\CC	QIJJGYHBXLEBJV-MVCMTJSTSA-N	ONLI_0580	193126	218179	117990	115097	174302	184338	216417	191950	168896	146356	131505	256022	219395	81119	129860	121777	213734	371135	319086	270708	445965	138436	114696	152514	112623	157035	335849	156324	239118	131672	188551	194641	198640	369295	233060	147998	129538	145398	205284	109156	218348
CSHNEG	1-(1Z-alkenyl),2-acyl-glycerophosphocholines	PC 32:0e; PC 16:0e/16:0;	Peak height	11146967		CCCCCCCCCCCCCCCC(=O)O[C@H](CO/C=C\CCCCCCCCCCCCCC)COP(=O)([O-])OCC[N+](C)(C)C	PEWXKAOBUSBJLD-MCBGMKGZSA-N	ONLI_0581	289533	297650	256728	267887	337240	332816	326909	253162	198267	266533	332166	268683	327630	316880	308063	210809	304034	357930	315365	409522	273648	284117	295318	264490	257966	304451	312659	392893	333252	229655	234475	245853	281197	316501	400762	265713	251344	270811	428200	276116	343048
CSHNEG	Glycosyl-N-acylsphingosines	HexCer-NS d36:1; HexCer-NS d18:1/18:0;	Peak height	135039461		CCCCCCCCCCCCCCCCCC(=O)N[C@@H](CO[C@@H]1C(C([C@@H](C(O1)CO)O)O)O)[C@@H](/C=C/CCCCCCCCCCCCC)O	YMYQEDCYNANIPI-FKFSGHLWSA-N	ONLI_0582	0	0	264749	136432	37637	0	0	154021	179702	89626	0	0	30281	191455	113406	41854	0	0	0	0	0	114660	292622	220312	106524	379707	0	0	0	142455	195674	181141	24097	0	37601	338818	228880	292857	25541	180523	0
CSHNEG	Sphingomyelins	SM d36:2	Peak height	52931161		CCCCCCCCCCCCCCCCCC(=O)N[C@@H](COP(=O)([O-])OCC[N+](C)(C)C)[C@@H](/C=C/CCCCCCCC/C=C\CCC)O	NELGJAUZKNHZLS-NUIAMLAYSA-N	ONLI_0583	170194	90020	271251	186146	91732	88195	72039	223297	206948	176121	89007	78039	188676	241591	227852	211113	92204	103950	64475	96918	108050	241999	271031	211331	186357	324591	173440	89210	91112	189482	187474	259690	102777	91961	206071	227216	284171	341946	136556	206081	66370
CSHNEG	Phosphatidylethanolamines	PE 40:7; PE 18:1-22:6;	Peak height	52922113		CCCCCCCC/C=C\CCCCCCCC(=O)OC[C@H](COP(=O)(O)OCCN)OC(=O)CC/C=C\C/C=C\C/C=C\C/C=C\C/C=C\C/C=C\CC	JZSZAGWWWKKXLO-RMEBTJIYSA-N	ONLI_0584	1967980	1831590	1066293	1172628	3449649	2451918	1404024	1072494	765921	1076469	2031667	2231007	2489940	1307381	949928	473970	2781177	2648289	2239071	2179142	3196615	1393865	931094	873258	578734	1296721	1977087	2803826	2704970	1098614	1319433	646702	2710882	2372100	2430876	1230525	831811	729493	1546435	809349	1246961
CSHNEG	Phosphatidylcholines	PC 32:2; PC 14:0-18:2;	Peak height	24778624		CCCCCCCCCCCCCC(=O)OC[C@H](COP(=O)([O-])OCC[N+](C)(C)C)OC(=O)CCCCCCC/C=C\C/C=C\CCCCC	IWXJKHSPEQSQMD-GMGFYYQASA-N	ONLI_0585	479492	676877	305286	412736	957952	801727	574728	459346	394091	484422	681298	887583	748027	457796	530047	406972	664696	832118	691382	723905	918123	544111	335195	301504	418469	340260	621147	922591	1100358	569903	515008	456758	761030	674657	651963	347565	354398	446318	588025	359412	819404
CSHNEG	Phosphatidylethanolamines	PE 40:6; PE 18:0-22:6;	Peak height	9546798		CCCCCCCCCCCCCCCCCC(=O)OC[C@H](COP(=O)(O)OCCN)OC(=O)CC/C=C\C/C=C\C/C=C\C/C=C\C/C=C\C/C=C\CC	XYYHNDVKALDFHQ-OXHZBIAZSA-N	ONLI_0586	1818198	1700232	1251268	1143968	2820888	1942760	1721856	1024609	1120778	936215	1522709	2025266	1829611	1077631	1219942	596171	1844473	2629597	2028803	1932890	3375855	1246978	1293645	1144509	810335	1724175	2290554	1990904	3358290	979191	1690015	929200	2714963	2545467	2628881	1593580	908019	1151948	1559552	774628	1746326
CSHNEG	Phosphatidylethanolamines	PE 40:5; PE 18:0-22:5;	Peak height	53479611		CCCCCCCCCCCCCCCCCC(=O)OC[C@H](COP(=O)(O)OCCN)OC(=O)CC/C=C\C/C=C\C/C=C\C/C=C\C/C=C\CCCCC	DPRXQVIZBLENFV-NPQRSGSQSA-N	ONLI_0588	240273	228161	45444	97537	349455	254666	241119	95809	81442	72223	252754	230094	260491	46886	137625	27217	307195	455070	319873	248113	580575	111225	41603	94461	46983	119126	297632	429209	453455	75410	144984	40859	353748	315051	297588	144737	43026	43107	243304	37319	260688
CSHNEG	1-alkyl,2-acylglycero-3-phosphocholines	PC 34:3e; PC 16:1e/18:2;	Peak height	53481709		CCCCCC/C=C\CCCCCCCCOC[C@H](COP(=O)([O-])OCC[N+](C)(C)C)OC(=O)CCCCCCC/C=C\C/C=C\CCCCC	AXCLECQLCBWNLZ-KZZBVOOISA-N	ONLI_0589	255249	364195	178966	249450	349036	231492	234605	255898	235255	262297	255967	373291	439501	218483	364954	295113	390831	375197	427317	459517	544590	363613	248876	207965	243660	234313	330039	420232	483108	283783	258119	315719	361928	324529	295841	204619	211134	185089	415775	176102	325809
CSHNEG	Phosphatidylcholines	PC 33:2; PC 15:0-18:2;	Peak height	24778664		CCCCCCCCCCCCCCC(=O)OC[C@H](COP(=O)([O-])OCC[N+](C)(C)C)OC(=O)CCCCCCC/C=C\C/C=C\CCCCC	DGBYUHHIADYUMU-UESLNCBNSA-N	ONLI_0590	1273566	1140992	560320	726182	1055290	1076690	937448	793860	690750	771868	888752	1059424	1279132	613179	776812	734251	1061208	1336698	1491857	1672234	1356578	853062	758919	566368	595480	548886	1631776	1212872	1325840	830887	704646	840381	1432006	1037564	1039947	611215	518578	649418	1251366	445000	1029418
CSHNEG	1-alkyl,2-acylglycero-3-phosphocholines	PC 34:2e; PC 16:1e/18:1;	Peak height	138286710		CCCCCCCC/C=C\CCCCCCCC(=O)OC(COCCCCCCCC/C=C\CCCCCC)COP(=O)([O-])OCC[N+](C)(C)C	WDQJCKHLEYAETE-MGXYOJEMSA-N	ONLI_0592	71788	85218	80321	87694	84518	67920	68529	84792	64041	89049	95892	69332	70680	77342	98219	77470	74448	78834	62549	71316	105557	83367	75278	93074	63549	70791	75437	100307	77478	70378	60490	69086	111669	65841	86158	35010	73797	90817	85108	71423	37052
CSHNEG	1-alkyl,2-acylglycero-3-phosphocholines	PC 34:2e; PC 16:0e/18:2;	Peak height	6443157		CCCCCCCCCCCCCCCCOC[C@H](COP(=O)([O-])OCC[N+](C)(C)C)OC(=O)CCCCCCC/C=C\C/C=C\CCCCC	IQACMFWAGALEAQ-WESJWMGVSA-N	ONLI_0593	420559	556101	247610	245937	529069	384006	453510	241460	221287	218696	337082	480841	456133	225635	299069	249228	481469	499188	595960	622622	533244	326082	290713	232191	317545	289150	582880	622317	597120	273602	288120	289686	514974	571107	501117	230050	212828	215999	536686	205791	544504
CSHNEG	Sphingomyelins	SM d38:1; SM d16:1/22:0;	Peak height	52931183		CCCCCCCCCCCCCCCCCCCCCC(=O)N[C@@H](COP(=O)([O-])OCC[N+](C)(C)C)[C@@H](/C=C/CCCCCCCCCCC)O	XNBRFUCJENKXCT-SVLGDMRNSA-N	ONLI_0594	35802	25699	34924	32053	31354	71293	62437	68240	19517	53704	65910	68129	25597	24703	32612	37333	59478	72007	32404	0	65702	0	29070	64980	28310	25276	54226	30108	32185	26060	54643	16918	58943	58169	80469	0	60311	21518	30153	25130	24316
CSHNEG	1-alkyl,2-acylglycerophosphoethanolamines	PC 34:1e; PC 16:0e/18:1;	Peak height	42607455		CCCCCCCCCCCCCCCCOC[C@H](COP(=O)(O)OCCN)OC(=O)CCCCCCC/C=C\CCCCCCCC	JJGMGPGKWYLISM-NPBIGWJUSA-N	ONLI_0596	481790	588173	558144	581490	589776	625522	589333	500169	419094	504786	576091	542156	619517	651054	596246	537740	564496	716701	659154	658972	686429	538720	543632	530989	482788	608373	536548	658787	711895	475321	547253	469373	682969	734947	819661	562233	547685	549793	703541	626198	529832
CSHNEG	Phosphatidylinositols	PI 32:1; PI 16:0-16:1;	Peak height	52928334	C00626	CCCCCCCCCCCCCCCC(=O)OC[C@H](COP(=O)(O)OC1C([C@@H](C(C(C1O)O)O)O)O)OC(=O)CCCCCCC/C=C\CCCCCC	QAWXBJDYTIBLRK-JEHNQGNYSA-N	ONLI_0597	33533	73592	17672	44970	121296	112046	109362	25417	53751	54487	158720	265406	119378	0	100793	20072	134850	252612	194174	102834	253531	26949	28202	20836	0	28337	85058	121370	365220	20475	50095	30286	122569	185908	143444	0	18703	28351	56437	20657	216249
CSHNEG	Phosphatidylinositols	PI 32:0; PI 16:0-16:0;	Peak height	24779556	C00626	CCCCCCCCCCCCCCCC(=O)OC[C@H](COP(=O)(O)OC1C([C@@H](C(C(C1O)O)O)O)O)OC(=O)CCCCCCCCCCCCCCC	IBUKXRINTKQBRQ-CSRWQWPHSA-N	ONLI_0598	85373	111995	32450	106541	149373	111463	77378	100737	101023	133701	65061	178744	112175	32836	115497	126468	119591	129152	198237	177906	208210	128232	93024	69350	90343	82093	138987	107104	149003	113087	135899	152695	117174	132945	76817	81362	68314	106904	117022	75616	115325
CSHNEG	Phosphatidylcholines	PC 34:4; PC 14:0-20:4;	Peak height	53478607	C00157	CCCCCCCCCCCCCC(=O)OC[C@H](COP(=O)([O-])OCC[N+](C)(C)C)OC(=O)CCCCCC/C=C\C/C=C\C/C=C\C/C=C\CC	BXZPYXMUABUWBT-JAHIUHDMSA-N	ONLI_0599	173568	175002	112235	181854	262521	383108	178341	168033	128967	170820	240931	252277	301962	185281	155834	135724	255590	241568	226116	185250	327417	180959	135150	100522	133457	136121	175732	275736	301307	218728	223505	180984	258974	214512	321646	107587	119339	134252	171805	143811	231618
CSHNEG	Phosphatidylcholines	PC 34:3	Peak height	24778699	C00157	CCCCCCCCCCCCCCCC(=O)OC[C@H](COP(=O)([O-])OCC[N+](C)(C)C)OC(=O)CCCC/C=C\C/C=C\C/C=C\CCCCC	CNNSEHUKQJCGTE-UPPWDXJYSA-N	ONLI_0600	2517389	1836122	1160225	1161543	2087150	1760124	2756166	1192544	1464023	1204258	2521068	2338694	2380120	1102719	1953618	1129452	2597768	3797177	2650802	3074250	2847392	1514854	1512636	1223414	1133979	1598186	2902858	2335667	3922110	1440576	2101849	1568472	3154928	2521841	3000796	1503662	1266909	1470418	2038554	1103707	2597230
CSHNEG	Phosphatidylcholines	PC 34:3; PC 16:1-18:2;	Peak height	24778768		CCCCCC/C=C\CCCCCCCC(=O)OC[C@H](COP(=O)([O-])OCC[N+](C)(C)C)OC(=O)CCCCCCC/C=C\C/C=C\CCCCC	QJWDAOSZZYVBJZ-KXESGEQTSA-N	ONLI_0601	3513576	4070807	1884567	3110942	5068684	6642150	3574388	2749800	1534114	2169714	6168788	4642186	4380460	2126224	2421032	1651510	5136263	6574205	4300878	3943098	7356458	2271500	2168678	1473972	1420896	2519594	3006682	4991086	7076950	1940481	2197022	1568472	5832510	3982104	6546846	1796110	1704318	2140268	3600483	2307598	3416766
CSHNEG	1-alkyl,2-acylglycero-3-phosphocholines	PC 36:5e; PC 16:1e/20:4;	Peak height	53481713		CCCCCC/C=C\CCCCCCCCOC[C@H](COP(=O)([O-])OCC[N+](C)(C)C)OC(=O)CCC/C=C\C/C=C\C/C=C\C/C=C\CCCCC	HOTMLHWJOWGLLX-UZKIFIPLSA-N	ONLI_0603	424247	413091	641657	530452	503267	545903	335854	547617	596474	510036	357457	458418	558763	601454	510888	742399	371401	412811	465712	505034	494365	617966	590978	739615	531945	671565	407710	424158	436308	534917	524405	554960	518125	456977	491605	490461	584493	770524	687904	506600	389161
CSHNEG	Phosphatidylcholines	16:0-20:4 PC	Peak height	10747814	C00157	CCCCCCCCCCCCCCCC(=O)OC[C@H](COP(=O)([O-])OCC[N+](C)(C)C)OC(=O)CCC/C=C\C/C=C\C/C=C\C/C=C\CCCCC	IIZPXYDJLKNOIY-JXPKJXOSSA-N	ONLI_0604	2926510	2091232	2998932	3145496	1980067	3189712	3522325	3254940	2767373	3066124	3339959	5130266	1683745	2026441	2858327	3830864	3166978	3169016	2982327	1325395	3175786	1484369	2925860	2367704	2747020	1641859	3703490	1588567	3009511	1767681	3159472	2364368	3237640	3403977	3579378	1532240	2709987	1972982	1693597	1568551	2972946
CSHNEG	1-alkyl,2-acylglycero-3-phosphocholines	PC 36:4e; PC 16:0e/20:4;	Peak height	53481701		CCCCCCCCCCCCCCCCOC[C@H](COP(=O)([O-])OCC[N+](C)(C)C)OC(=O)CCCCCC/C=C\C/C=C\C/C=C\C/C=C\CC	SOUZQPFUXRVDGK-KCTKZSJBSA-N	ONLI_0605	996694	1050964	961444	959586	1285879	1388125	1068332	1112796	962965	843343	1076552	1126664	1225469	1079094	1007114	1031776	1061678	1606178	1454395	1322008	1161910	907133	1120381	903953	871689	1048052	1331725	1583646	1460704	876516	1121889	975834	1342350	1441595	1557621	840414	943944	1036988	1521593	1129811	1138394
CSHNEG	Phosphatidylcholines	PC 36:3; PC 16:0-20:3;	Peak height	24778719	C00157	CCCCCCCCCCCCCCCC(=O)OC[C@H](COP(=O)([O-])OCC[N+](C)(C)C)OC(=O)CCCCCC/C=C\C/C=C\C/C=C\CCCCC	SRIGHEHXEGELQJ-YYQUKWHJSA-N	ONLI_0606	1666719	1089421	1510946	1772431	1282881	1766662	1335736	1765624	1549961	1743533	1462091	2788845	1111267	824510	1556131	1178018	1638082	1689419	1772110	916801	1933642	845573	1489305	1006795	1131986	727778	2088308	1001501	1982250	1058880	1350397	1112977	1859282	2048318	1584190	652584	1148663	992182	969480	806842	1537602
CSHNEG	1-alkyl,2-acylglycero-3-phosphocholines	PC 36:3e; PC 18:1e/18:2;	Peak height	6443159		CCCCCCCC/C=C\CCCCCCCCOC[C@H](COP(=O)([O-])OCC[N+](C)(C)C)OC(=O)CCCCCCC/C=C\C/C=C\CCCCC	MFZLAZYUXHHSIA-HVODBARTSA-N	ONLI_0607	44238	40252	0	0	52751	37187	55588	56437	0	0	56512	52450	44423	0	0	52832	41607	54111	56844	0	57715	42661	0	37795	0	50895	41863	62270	40264	0	0	25506	36577	52533	60700	0	32615	40921	63585	0	43888
CSHNEG	Sphingomyelins	SM d40:2; SM d14:0/26:2;	Peak height	NA		0	0	ONLI_0608	143269	108973	59357	46943	87767	138388	154265	81827	34117	69662	177541	203789	69562	32446	67887	77289	159834	181237	166760	102827	220245	0	60800	39161	65725	31073	209346	116151	160552	31821	79548	56088	182021	169731	192202	27732	67113	29455	106773	25363	155285
CSHNEG	1-alkyl,2-acylglycero-3-phosphocholines	PC 36:2e; PC 18:0e/18:2;	Peak height	6443070		CCCCCCCCCCCCCCCCCCOC[C@H](COP(=O)([O-])OCC[N+](C)(C)C)OC(=O)CCCCCCC/C=C\C/C=C\CCCCC	LMGTVCKIUNTOEP-HJTCUGKVSA-N	ONLI_0609	231857	223877	207687	179672	214255	207316	218686	173753	142237	187986	162363	264850	313678	177370	180767	189656	246638	290794	246311	334021	253951	235227	227511	244934	221119	247814	268923	211155	273227	173570	201587	186905	229752	291525	240397	187557	248840	174993	339792	137608	245356
CSHNEG	Sphingomyelins	SM d39:1; SM d16:1/23:0;	Peak height	52931189		CCCCCCCCCCCCCCCCCCCCCCC(=O)N[C@@H](COP(=O)([O-])OCC[N+](C)(C)C)[C@@H](/C=C/CCCCCCCCCCC)O	DZDNLWWCTCDASI-QVDCKBILSA-N	ONLI_0611	381872	315059	151184	148768	285304	342478	359251	178801	158523	121252	410942	304190	295889	169691	188560	130623	290847	406589	265135	361332	375103	160629	150078	137968	160111	159809	314241	349980	392884	197274	152924	135151	382508	321381	432688	142154	149909	148136	444054	192098	360199
CSHNEG	Phosphatidylcholines	PC 35:1; PC 17:0-18:1;	Peak height	5313302		CCCCCCCCCCCCCCCCC(=O)OC[C@H](COP(=O)(O)OCC[N+](C)(C)C)OC(=O)CCCCCCC/C=C\CCCCCCCC	SXNXGNVZTLZDHE-IYEJTHTFSA-O	ONLI_0613	451219	417139	268826	388692	436409	363762	450324	353133	334784	248673	439868	437715	371728	340232	355443	254376	421119	575654	439865	493951	545019	313241	226066	177843	214732	224510	415069	415761	538730	338217	288368	226976	486220	415404	452885	308367	185890	217296	358808	213651	417989
CSHNEG	Phosphatidylinositols	PI 34:2; PI 16:0-18:2;	Peak height	46891796		CCCCCCCCCCCCCCCC(=O)OC[C@H](COP(=O)(O)OC1C([C@@H](C(C(C1O)O)O)O)O)OC(=O)CCCCCCC/C=C\C/C=C\CCCCC	BSNJSZUDOMPYIR-YBCFFXQBSA-N	ONLI_0614	7920890	7595722	3362142	4911686	9769659	6503487	7083154	4535458	5992161	6233333	6825766	10918169	9813400	3297097	9536593	5516310	10645145	12607281	13184543	12429612	14485346	7628272	6316860	4599640	6134548	4765780	12267061	10648029	15286615	6639624	7391813	6186538	12661116	10167023	9241527	4636498	3840234	5432912	9914215	4380276	10230774
CSHNEG	Phosphatidylinositols	PI 34:1; PI 16:0-18:1;	Peak height	5771758		CCCCCCCCCCCCCCCC(=O)OC[C@H](COP(=O)(O)OC1C([C@@H](C(C(C1O)O)O)O)O)OC(=O)CCCCCCC/C=C\CCCCCCCC	PDLAMJKMOKWLAJ-PVPULFMTSA-N	ONLI_0615	766563	938078	373249	633551	1152774	738662	642772	611365	830072	727181	688772	1299743	1118766	324596	1168577	580037	947448	1394159	1449629	1329453	1787716	746885	672712	453672	532301	448331	1109128	982490	1764489	795888	799359	649410	1338948	1565439	961154	438885	433790	654366	1003202	509406	1209108
CSHNEG	Phosphatidylcholines	PC 36:4; PC 16:0-20:4;	Peak height	53478669	C00157	CCCCCCCCCCCCCCCC(=O)OC[C@H](COP(=O)([O-])OCC[N+](C)(C)C)OC(=O)CCCCCC/C=C\C/C=C\C/C=C\C/C=C\CC	JAVWFBAAZSHHAD-HCYAGMRRSA-N	ONLI_0617	39944260	34557080	36588928	40518636	40459448	42432736	34918148	35155792	34303880	35343920	43498248	38152304	41073816	35750232	37165904	29695132	44659368	42338800	39213212	37590416	47189972	35380876	38130548	36117664	30418086	37223512	34857328	42851036	41540908	33427118	41704212	34486804	45110480	44651428	50544168	36898152	36096192	38840704	39854724	38611168	33771028
CSHNEG	Ceramides	HexCer-NS d40:2; HexCer-NS d18:1/22:1;	Peak height	NA		0	0	ONLI_0618	99604	136483	90671	57513	227938	241532	83444	80119	84990	43211	314321	341783	287481	58141	80976	20854	210484	232575	232562	113367	607189	79505	81902	67252	27653	86241	78684	281223	234910	68815	76541	65416	223088	493752	424515	84689	82794	101324	137925	67743	224481
CSHNEG	Sphingomyelins	SM d40:3; SM d14:1/26:2;	Peak height	52931199		CCCCCCCC/C=C\CCCCCCCCCCCC(=O)N[C@@H](COP(=O)([O-])OCC[N+](C)(C)C)[C@@H](/C=C/CCCCCCCC/C=C\CCC)O	FMJPKVXVBYILLP-FTRJIJDXSA-N	ONLI_0619	183301	208365	136657	136068	288349	446007	190761	125375	99754	108110	332885	292927	380252	183141	92051	81218	287307	295201	278965	198165	461920	143565	136303	101709	110914	126158	143398	296910	268945	153440	133503	89567	237736	405431	500853	100525	124818	127422	281439	221543	322200
CSHNEG	Phosphatidylcholines	PC 36:3 a	Peak height	53478723		CCCCCC/C=C\CCCCCCCCCC(=O)OC[C@H](COP(=O)([O-])OCC[N+](C)(C)C)OC(=O)CCCCCCC/C=C\C/C=C\CCCCC	YBNAKFLXDDROCX-YGRWKTHCSA-N	ONLI_0620	17941684	15149478	13240506	17597622	19634292	18731434	10424558	14954810	16231092	15154869	15301530	17311852	21506996	11990215	16021765	9975962	19059766	19044622	19247296	17903208	21756980	17876960	15922405	11481082	11162406	13298497	18322922	20178158	21803930	15358963	14741006	14330707	20444244	21681182	17622514	13543536	12366038	13862967	19690768	14457111	14930314
CSHNEG	Phosphatidylcholines	PC 36:3 b	Peak height	24778715		CCCCCCCCCCCCCCCC(=O)OC[C@H](COP(=O)([O-])OCC[N+](C)(C)C)OC(=O)CCC/C=C\C/C=C\C/C=C\CCCCCCCC	XMZFUVYOYPLVOA-VLHUWQDUSA-N	ONLI_0621	15849112	14816153	13240506	17272772	17262724	16848084	10424558	14443004	15113593	15154869	15301530	17110554	19398836	11900258	13349022	7651489	16887562	16957060	19056414	17903208	21756980	17296264	15068190	10776594	10330976	12815375	18128324	20178158	21803930	14516907	14084100	11976540	20444244	21392124	15834586	13543536	12076881	13862967	19690768	13217951	14017839
CSHNEG	Phosphatidylcholines	PC 36:3; PC 18:1-18:2;	Peak height	24778939		CCCCCCCC/C=C\CCCCCCCC(=O)OC[C@H](COP(=O)([O-])OCC[N+](C)(C)C)OC(=O)CCCCCCC/C=C\C/C=C\CCCCC	GDWULUGDXGHJIJ-VJHNMZKJSA-N	ONLI_0622	17941684	15149478	13240506	17597622	19634292	18731434	10424558	14954810	16231092	15154869	15301530	17311852	21506996	11990215	16021765	9975962	19059766	19044622	19247296	17903208	21756980	17876960	15922405	11481082	11162406	13298497	18322922	20178158	21803930	15358963	14741006	14330707	20444244	21681182	17622514	13543536	12366038	13862967	19690768	14457111	14930314
CSHNEG	Sphingomyelins	SM d40:2; SM d18:2/22:0;	Peak height	52931237		CCCCCCCCCCCCCCCCCCCCCC(=O)N[C@@H](COP(=O)([O-])OCC[N+](C)(C)C)[C@@H](/C=C/CCCCCCCC/C=C\CCC)O	APNZBDYCMWLVNM-NWHASJFHSA-N	ONLI_0623	954001	952648	368207	378104	1211133	1448529	980154	387010	309878	348830	1285550	1104442	1205065	494639	473097	394855	1117428	1208659	1132431	1006308	2168802	468200	402792	488973	361866	475753	1129891	1090084	1312436	382890	448087	355681	1345499	1381077	1705579	315043	380101	415669	1435221	492810	1163852
CSHNEG	Phosphatidylcholines	PC 36:2; PC 18:0-18:2;	Peak height	6441487		CCCCCCCCCCCCCCCCCC(=O)OC[C@H](COP(=O)([O-])OCC[N+](C)(C)C)OC(=O)CCCCCCC/C=C\C/C=C\CCCCC	FORFDCPQKJHEBF-VPUSDGANSA-N	ONLI_0625	40860300	41631544	35846856	43509692	45634540	39289032	38834520	39043736	38403776	38789376	41717284	44990776	49442660	31570584	45123376	35632436	47732424	49330644	48888208	47692740	55813804	44651224	44020796	37905812	41292520	38866808	47442156	46692312	53818028	42498924	48053080	40795724	52871736	53258272	47009280	41581712	38010960	40113228	46077112	39511924	45766640
CSHNEG	Phosphatidylinositols	PI 35:2; PI 17:0-18:2;	Peak height	52927654		CCCCCCCCCCCCCCCCC(=O)OC[C@H](COP(=O)(O)OC1C([C@@H](C(C(C1O)O)O)O)O)OC(=O)CCCCCCC/C=C\C/C=C\CCCCC	AJAKJCJJRMUWFW-WNEYDAEMSA-N	ONLI_0628	506783	431767	184988	241250	509219	370681	318700	230662	301236	397765	341742	472127	675291	172263	455397	294198	570459	605150	659617	670067	781890	403285	392687	197148	250706	226700	676122	574834	730922	381083	386692	361905	785589	609265	489363	256342	206872	273636	688067	242119	500724
CSHNEG	Phosphatidylcholines	PC 36:0; PC 16:0-20:0;	Peak height	24778711		CCCCCCCCCCCCCCCCCCCC(=O)O[C@H](COC(=O)CCCCCCCCCCCCCCC)COP(=O)([O-])OCC[N+](C)(C)C	HVPURDWMANOTFO-HUESYALOSA-N	ONLI_0629	32300	26666	25266	0	35074	25985	24475	26375	0	32962	32975	39413	0	48246	104239	48157	33657	243495	0	31057	34821	41972	0	73024	112889	82393	0	27308	25859	40614	25602	145696	33083	123058	28082	74310	132370	33031	82549	31045	31309
CSHNEG	Phosphatidylcholines	PC 38:6e; PC 18:2e/20:4;	Peak height	24778979		CCCCC/C=C\C/C=C\CCCCCCCC(=O)OC[C@H](COP(=O)([O-])OCC[N+](C)(C)C)OC(=O)CCC/C=C\C/C=C\C/C=C\C/C=C\CCCCC	ZZSZQATYGVHNLZ-PUMLCSCDSA-N	ONLI_0631	72900	44966	77889	73597	98505	75881	78277	71043	41106	58159	69122	76394	40184	106851	38904	84341	70168	65393	77560	81174	94026	78299	72499	77530	75913	64443	72876	90971	69008	39644	74292	43582	82226	85491	95773	74695	79670	83440	164859	73656	51624
CSHNEG	1-alkyl,2-acylglycero-3-phosphocholines	PC 38:5e; PC 18:1e/20:4; [M+Hac-H]-	Peak height	70698776		CCCCCCCC/C=C\CCCCCCCCOC[C@H](COP(=O)(O)OCC[N+](C)(C)C)OC(=O)CCCCCC/C=C\C/C=C\C/C=C\C/C=C\CC	YPEVVVCDYBKGNI-XVPBXHJGSA-O	ONLI_0632	602906	803534	719100	767364	867229	956797	689312	762261	579213	704630	794352	843165	828424	800342	797852	599007	741118	923924	994564	770823	736357	689916	675973	621416	574126	686577	715054	1047517	979000	648921	709856	642840	857962	874456	1141502	628092	692686	655326	952745	976833	845809
CSHNEG	Phosphatidylcholines	PC 37:4; PC 17:0-20:4;	Peak height	24778518		CCCCCCCCCCCCCCCCC(=O)OC[C@H](COP(=O)([O-])OCC[N+](C)(C)C)OC(=O)CCC/C=C\C/C=C\C/C=C\C/C=C\CCCCC	MHUZXLUKTLNHIX-GUNPMBPGSA-N	ONLI_0633	1319854	836701	1099603	1517364	979087	1256833	1144998	1292152	911554	1129242	1207657	1042770	1079193	1167466	814980	1047027	1292064	1121293	917884	1101972	1265512	996071	1246654	868732	808180	1054710	1013252	1049544	963758	1035998	1129595	909308	1318741	1156384	1199843	1163597	901989	1032267	1113136	1125118	791485
CSHNEG	1-alkyl,2-acylglycero-3-phosphocholines	PC 38:4e; PC 18:0e/20:4;	Peak height	6443065		CCCCCCCCCCCCCCCCCCOC[C@H](COP(=O)([O-])OCC[N+](C)(C)C)OC(=O)CCC/C=C\C/C=C\C/C=C\C/C=C\CCCCC	GBNPCIWXLWZJGA-IGBSIYCFSA-N	ONLI_0635	364578	299646	324089	278232	338361	427929	298892	383486	283609	285158	314941	303723	309341	356493	347348	269870	300511	391446	395391	425005	329251	350882	374591	402928	358309	434064	339675	312245	397529	317935	392276	353983	352251	335885	332217	332214	338785	318522	463434	347529	312537
CSHNEG	Glycosyl-N-acylsphingosines	GlcCerd18:14E/24:0	Peak height	6321361		CCCCCCCCCCCCCCCCCCCCCCCC(=O)N[C@@H](CO[C@H]1C(C([C@@H]([C@H](O1)CO)O)O)O)[C@@H](/C=C/CCCCCCCCCCCCC)O	POQRWMRXUOPCLD-AAAFHMTMSA-N	ONLI_0637	134330	72329	160611	196397	79524	94178	85511	171072	123813	144346	114652	136994	88394	80353	180134	88540	116321	206121	187183	86561	180572	125124	183510	151958	87877	109751	119366	85080	208779	106033	198775	97172	174467	161712	191130	127254	101669	134855	101359	75063	96058
CSHNEG	Phosphatidylinositols	PI 36:4; PI 16:0-20:4;	Peak height	53480053		CCCCCCCCCCCCCCCC(=O)OC[C@H](COP(=O)(O)OC1C([C@@H](C(C(C1O)O)O)O)O)OC(=O)CCCCCC/C=C\C/C=C\C/C=C\C/C=C\CC	VWRYMIZQLPXULA-ZLIQYQLMSA-N	ONLI_0638	13331469	12619303	6764856	10175787	15743122	13628174	15307825	9542453	9201672	10785424	18441212	19374398	16454473	8495011	16376108	7723498	19139362	25613362	19865460	16293813	26244378	10640971	9952136	7335434	8594464	8383007	16816810	16985746	25046000	10983312	14224688	9983244	22208900	19479484	18253370	7896490	6971978	8756122	12824021	10445353	17701120
CSHNEG	Phosphatidylcholines	PC 37:2; PC 19:0-18:2;	Peak height	52922957		CCCCCCCCCCCCCCCCCCC(=O)OC[C@H](COP(=O)([O-])OCC[N+](C)(C)C)OC(=O)CCCCCCC/C=C\C/C=C\CCCCC	LOOVXTAPKGYHKO-HJTCUGKVSA-N	ONLI_0640	3085595	3251110	1024860	1553246	3345801	3028186	2938502	1398364	1527952	1350208	2418339	2746692	3741373	1102540	2107862	1699544	3523554	4219608	3694317	4827137	3993075	2096822	1695522	1213858	1621066	1595153	3990499	4425875	4329188	1799905	1625298	1403973	5420707	4070043	3381429	1024330	1079766	1548248	4794050	1281339	3399649
CSHNEG	Phosphatidylinositols	PI 36:3; PI 18:1-18:2;	Peak height	52928384		CCCCCCCC/C=C\CCCCCCCC(=O)OC[C@H](COP(=O)(O)OC1C([C@@H](C(C(C1O)O)O)O)O)OC(=O)CCCCCCC/C=C\C/C=C\CCCCC	MXJMOLQIXMJUEL-PEAJWMICSA-N	ONLI_0641	3737561	2542864	1515866	2314844	3125215	3294571	2349836	1829582	1552178	1741745	2497133	2970446	3242126	1307672	2066902	1438430	3388140	3590810	2723518	2728104	4758514	2049384	2067926	1485214	1324578	1612030	2741054	3402306	3888435	1954571	1683086	1539207	3968814	3057772	2943910	1443572	1537069	1736815	3260200	1614952	2227091
CSHNEG	Phosphatidylcholines	PC 37:1; PC 19:0-18:1;	Peak height	52922955		CCCCCCCCCCCCCCCCCCC(=O)OC[C@H](COP(=O)([O-])OCC[N+](C)(C)C)OC(=O)CCCCCCC/C=C\CCCCCCCC	WMCPHMOQTITNBG-KXTYCBLYSA-N	ONLI_0643	212900	215167	63194	102979	223619	180373	202446	87077	84868	82779	166613	194530	197982	70695	116597	108829	198576	244739	194074	255504	249454	98349	75613	75764	61282	72630	193506	227981	273396	94421	83119	87290	292384	264906	228774	32376	35696	61555	208270	90213	205431
CSHNEG	Phosphatidylinositols	PI 36:2; PI 18:0-18:2;	Peak height	52928409		CCCCCCCCCCCCCCCCCC(=O)OC[C@H](COP(=O)(O)OC1C([C@@H](C(C(C1O)O)O)O)O)OC(=O)CCCCCCC/C=C\C/C=C\CCCCC	KZVRAFHIKMDULK-LNVBWDHHSA-N	ONLI_0644	12192783	11499026	6540162	9419205	16542067	11573755	9288917	8146250	10080764	11793990	9860908	15495453	16281238	5626641	16247113	9372954	16216660	17733336	18542200	19135402	22113580	13256712	11706958	7844660	10819535	8742575	18911680	17958926	21377260	11520874	13559986	10546539	18690406	17436858	13416800	7999864	7346424	9450775	17197214	8322786	14798131
CSHNEG	Phosphatidylcholines	PC 38:7; PC 16:1-22:6;	Peak height	24778773		CCCCCC/C=C\CCCCCCCC(=O)OC[C@H](COP(=O)([O-])OCC[N+](C)(C)C)OC(=O)CC/C=C\C/C=C\C/C=C\C/C=C\C/C=C\C/C=C\CC	DLRNZUPJXRVWRW-FKZZUUMNSA-N	ONLI_0645	589513	746137	410215	628690	1147657	1696907	779456	596114	265932	372363	1349939	1036898	1040738	523945	501890	236433	1241994	1451722	830570	659018	1561383	394041	459461	379831	236302	480334	442602	1217586	1188165	591657	554606	277159	1134889	951929	1651320	338385	409769	479687	646515	667996	779183
CSHNEG	Phosphatidylinositols	PI 36:1; PI 18:0-18:1;	Peak height	13073037		CCCCCCCCCCCCCCCCCC(=O)OCC(COP(=O)(O)OC1[C@@H]([C@H](C([C@H]([C@@H]1O)O)O)O)O)OC(=O)CCCCCCC/C=C/CCCCCCCC	YOBFISPJJWPPTK-UDGQDVNKSA-N	ONLI_0646	564281	897970	224551	456835	986875	466599	556947	360950	568884	741570	392242	800794	851270	257777	815102	660200	660079	797436	949855	1098052	1020885	728342	488725	329871	557053	312053	798804	842829	915039	663389	603587	707774	782655	847356	492365	339584	411001	535069	732013	460701	1094280
CSHNEG	Phosphatidylcholines	PC 38:6; PC 18:2-20:4;	Peak height	53478789	C00157	CCCCC/C=C\C/C=C\CCCCCCCC(=O)OC[C@H](COP(=O)([O-])OCC[N+](C)(C)C)OC(=O)CCCCCC/C=C\C/C=C\C/C=C\C/C=C\CC	RUHBZJXWUDKAMZ-XXAGCNFXSA-N	ONLI_0648	5430754	4066265	3465971	4381724	5348045	6446096	3711438	4184515	3607238	3963839	5263764	4367226	5569128	3799732	4193717	2751287	6480418	5216749	5090190	4834084	6683128	3760898	4815600	3017912	3670048	3481130	4387912	6257094	5881670	3782828	4827372	3630953	6994868	6108585	6020898	4248222	3516632	3890098	5487100	4069912	3983925
CSHNEG	Sphingomyelins	SM d42:5; SM d14:3/28:2;	Peak height	NA		0	0	ONLI_0649	0	23557	348123	261857	0	72908	24563	206565	259104	145541	28116	0	30859	313554	104326	222297	0	0	0	0	0	253133	181908	274016	205124	274201	0	32385	0	167575	161792	155665	25185	22970	43520	174067	246613	280320	82320	345398	0
CSHNEG	Phosphatidylcholines	PC 38:5; PC 16:0-22:5;	Peak height	24778737		CCCCCCCCCCCCCCCC(=O)OC[C@H](COP(=O)([O-])OCC[N+](C)(C)C)OC(=O)CCCCC/C=C\C/C=C\C/C=C\C/C=C\C/C=C\CC	ARDJUHDXABDVFH-ZHSIBHBUSA-N	ONLI_0650	1267721	1348321	1105412	1372292	1901357	1428269	1576104	1338226	1224116	1505077	1865104	2309454	1782375	1592073	2510019	719757	1923351	1969358	1830014	1543769	2242850	1362980	1505436	1013450	1236051	1457540	1235199	1651605	1866767	1621790	2183970	1427189	1893617	2453182	2149280	1580397	1316376	1500143	750170	1766231	1931095
CSHNEG	Phosphatidylcholines	PC 38:5; PC 18:1-20:4;	Peak height	53478767	C00157	CCCCCCCC/C=C\CCCCCCCC(=O)OC[C@H](COP(=O)([O-])OCC[N+](C)(C)C)OC(=O)CCCCCC/C=C\C/C=C\C/C=C\C/C=C\CC	SWOKEJBWARJLGN-ORKYUJCWSA-N	ONLI_0651	4084622	5015156	4847140	6480624	7111574	7008744	5425562	6347378	3983564	4780134	6550146	6219588	6487250	6875886	3961746	3633076	6108574	6060189	5084924	4236220	7742100	4807774	3894406	4521703	3759800	4776918	3667758	7156692	5470638	6285368	4173414	4504570	5241987	7308403	7375878	4292249	4963278	5296384	4878060	6684272	5790574
CSHNEG	Sphingomyelins	HexCer-NS d42:3; HexCer-NS d18:1/24:2;	Peak height	NA		0	0	ONLI_0652	98157	83212	227153	193163	129312	128508	104925	148916	148346	153353	114338	125877	147529	198152	219789	94788	156981	150434	148745	153191	182596	273803	235080	202125	135323	261884	152325	182030	141862	155800	161158	135659	158138	161849	189743	233250	160128	157335	158665	145264	81419
CSHNEG	Phosphatidylcholines	PC 38:4	Peak height	16219824		CCCCCCCCCCCCCCCCCC(=O)OC[C@H](COP(=O)([O-])OCC[N+](C)(C)C)OC(=O)CCC/C=C\C/C=C\C/C=C\C/C=C\CCCCC	PSVRFUPOQYJOOZ-QNPWAGBNSA-N	ONLI_0653	22477284	18293992	27489310	29219200	21395488	23290234	20553240	28151266	22784634	22151526	24097604	18451164	24307736	25354528	20483002	19522848	23202864	20594572	18433638	20008832	23957704	23463410	28786646	26270868	21038126	29938552	17937102	24345288	19759706	24949746	30880178	24290920	25651244	24622284	29258500	29487682	25986548	31220672	21759256	32806726	15925001
CSHNEG	Phosphatidylcholines	PC 38:4; PC 16:0-22:4;	Peak height	24778732		CCCCCCCCCCCCCCCC(=O)OC[C@H](COP(=O)([O-])OCC[N+](C)(C)C)OC(=O)CCCCC/C=C\C/C=C\C/C=C\C/C=C\CCCCC	IRWRFKUTKSUFST-MDYGELLQSA-N	ONLI_0654	22477284	18293992	27489310	29219200	21395488	23290234	20553240	28151266	22784634	22151526	24097604	18451164	24307736	25354528	20483002	19522848	23202864	20594572	18433638	20008832	23957704	23463410	28786646	26270868	21038126	29938552	17937102	24345288	19759706	24949746	30880178	24290920	25651244	24622284	29258500	29487682	25986548	31220672	21759256	32806726	15925001
CSHNEG	Sphingomyelins	SM d42:3; SM d18:2/24:1;	Peak height	52931215		CCCCCCCC/C=C\CCCCCCCCCCCCCC(=O)N[C@@H](COP(=O)([O-])OCC[N+](C)(C)C)[C@@H](/C=C/CCCCCCCC/C=C\CCC)O	TXFLWJQVQCDUDZ-BRUGZULGSA-N	ONLI_0656	1942884	1927088	2223006	2195534	1907206	2194956	1852065	2258464	1681147	1987658	1964827	1757426	2222670	2252358	2390213	2101334	2411678	2327383	2040648	2001896	2332832	2428189	1914306	2222433	2018237	2291891	1952370	2181636	2126808	1877852	1958248	1999945	2233233	1881983	2532960	2373853	1988298	1980853	2615534	2280772	1644272
CSHNEG	Phosphatidylcholines	PC 38:3	Peak height	24778855		CCCCCCCCCCCCCCCCCC(=O)OC[C@H](COP(=O)([O-])OCC[N+](C)(C)C)OC(=O)CCC/C=C\C/C=C\C/C=C\CCCCCCCC	QXDDDGCNWRUEFM-UMKMFDOBSA-N	ONLI_0657	4906599	4346573	4623442	5599923	6017688	5713525	5411518	5551484	3642877	3822550	6834072	6586950	6396697	4827172	5898567	3179392	6971228	7027064	5911762	4395860	10640103	4976988	5037294	4430514	3818762	5228128	4973991	7538184	7241506	5566491	6663201	4360736	6555868	10139303	8691902	4647612	5129114	5409976	4462620	6470129	6269898
CSHNEG	Phosphatidylcholines	PC 38:3; PC 18:0-20:3;	Peak height	24778857		CCCCCCCCCCCCCCCCCC(=O)OC[C@H](COP(=O)([O-])OCC[N+](C)(C)C)OC(=O)CCCCCC/C=C\C/C=C\C/C=C\CCCCC	VGSUMLIRUGDCTF-NSMRCOLJSA-N	ONLI_0658	4906599	4346573	4623442	5599923	6017688	5713525	5505992	5551484	3642877	3822550	6834072	6586950	6396697	4827172	5898567	3179392	6971228	7027064	5911762	4395860	10640103	4976988	5037294	4430514	3873095	5228128	4973991	7538184	7241506	5763292	6663201	4484488	6555868	10139303	8691902	4647612	5129114	5409976	4462620	6470129	6397176
CSHNEG	Phosphatidylinositols	PI 37:4; PI 17:0-20:4;	Peak height	9547141		CCCCCCCCCCCCCCCCC(=O)OC[C@H](COP(=O)(O)OC1C([C@@H](C(C(C1O)O)O)O)O)OC(=O)CCC/C=C\C/C=C\C/C=C\C/C=C\CCCCC	IVKFRZJXXGDYJH-YAOSNULYSA-N	ONLI_0659	1155979	1064391	629411	861328	1045726	1071113	872154	824854	695927	788238	1090657	991649	1143943	911372	1054071	641409	1187748	1414604	1153357	1242484	1365117	769910	736135	618544	605250	704548	1259398	1134014	1274756	976192	887430	749788	1527638	1021018	1177599	689586	577410	734097	1197162	821753	929939
CSHNEG	Phosphosphingolipids	SM d42:2; SM d18:1/24:1;	Peak height	138265057		CCCCCCCCCCCCC/C=C/C(C(COP(=O)([O-])OCC[N+](C)(C)C)NC(=O)CCCCCCCCC/C=C\CCCCCCCCCCCC)O	SUTDVWUQTJGTCQ-IMMYYDDQSA-N	ONLI_0661	6034121	5274101	6185801	6841498	5408698	5034596	4889262	5811696	4774136	5274436	5050065	4052693	5678893	5722930	5811821	4967350	5500271	5466632	5333048	5321710	6821494	6546552	4940368	6143788	5277826	5720384	4504099	5091818	5484772	4988382	5224435	5563867	5090060	4427057	5619909	5730314	5290356	6060917	6094240	6725716	3845643
CSHNEG	Phosphatidylcholines	PC 38:1; PC 20:0-18:1;	Peak height	24779038	C00157	CCCCCCCCCCCCCCCCCCCC(=O)OC[C@H](COP(=O)([O-])OCC[N+](C)(C)C)OC(=O)CCCCCCC/C=C\CCCCCCCC	IKNYBQRADNMEDT-FHLWKLDVSA-N	ONLI_0663	201854	206336	87373	131064	280653	183220	262129	103298	131448	111575	229151	320022	240676	99558	115359	100352	300769	332671	245166	259667	409135	118668	88537	123133	97925	119430	232357	307358	389500	120806	136641	119246	334472	407141	308695	101184	104305	109182	166233	137402	354587
CSHNEG	Phosphatidylinositols	PI 37:2; PI 19:0-18:2;	Peak height	52927884		CCCCCCCCCCCCCCCCCCC(=O)OC[C@H](COP(=O)(O)OC1C([C@@H](C(C(C1O)O)O)O)O)OC(=O)CCCCCCC/C=C\C/C=C\CCCCC	NUMIHVUWHVIWMT-ISIIRVGKSA-N	ONLI_0664	576017	592980	221223	248841	1358405	734368	181863	291648	321520	333318	427122	1279811	1478354	190903	652772	134020	795299	1254605	1452410	2129316	1321104	677682	510741	148426	94366	362566	1762950	1601493	1704372	544708	282835	194563	1617936	1659618	747980	329400	87879	441868	1922991	337694	317692
CSHNEG	Phosphatidylcholines	PC 40:6; PC 18:0-22:6;	Peak height	24778876		CCCCCCCCCCCCCCCCCC(=O)OC[C@H](COP(=O)([O-])OCC[N+](C)(C)C)OC(=O)CC/C=C\C/C=C\C/C=C\C/C=C\C/C=C\C/C=C\CC	FAUYAENFVCNTAL-PFFNLMTBSA-N	ONLI_0665	1266486	722540	1581236	1383416	783570	1238856	1431801	1764489	1292208	1212504	1205642	1986485	722346	964275	1328922	1139023	1275519	1369726	1209798	496362	1478855	677710	1490702	1128803	1060024	821807	1225578	706085	1314585	932550	1533471	981350	1477988	1586748	1695883	931341	1301125	1114740	629947	989348	1053002
CSHNEG	Phosphatidylinositols	PI 38:6; PI 16:0-22:6;	Peak height	52927464		CCCCCCCCCCCCCCCC(=O)OC[C@H](COP(=O)(O)OC1C([C@@H](C(C(C1O)O)O)O)O)OC(=O)CC/C=C\C/C=C\C/C=C\C/C=C\C/C=C\C/C=C\CC	FPHAZHKZJQOPBU-BYFJYSEFSA-N	ONLI_0666	1018961	1020810	555444	707991	1244241	1100063	906664	757887	704297	751309	1162587	1360121	1358018	621167	1075040	668009	1523975	1615072	1628104	1135398	1802557	862992	979781	734158	669791	760724	1212165	1296464	1580203	892635	1073292	737369	1696318	1387484	1412977	632894	566066	764728	1054558	755281	1085057
CSHNEG	Phosphatidylcholines	PC 39:4; PC 19:0-20:4;	Peak height	52922975		CCCCCCCCCCCCCCCCCCC(=O)OC[C@H](COP(=O)([O-])OCC[N+](C)(C)C)OC(=O)CCC/C=C\C/C=C\C/C=C\C/C=C\CCCCC	XHOZASDZLMZZMU-TTYGYADASA-N	ONLI_0667	747402	583526	303627	423953	614431	734147	526533	367738	269507	330068	579797	480632	557250	389179	324521	374129	667807	605084	469894	658782	586244	348087	366894	344914	266416	350467	667904	696718	436550	339072	336930	316086	902252	626489	722576	278005	262316	335601	824329	364202	391434
CSHNEG	Phosphatidylinositols	PI 38:5; PI 18:1-20:4;	Peak height	52928302		CCCCCCCC/C=C\CCCCCCCC(=O)OC[C@H](COP(=O)(O)OC1C([C@@H](C(C(C1O)O)O)O)O)OC(=O)CCC/C=C\C/C=C\C/C=C\C/C=C\CCCCC	SHIZRFSRTKXRQL-FFZLMNBLSA-N	ONLI_0668	5683381	4326524	2331496	4460786	5655060	7087889	4109855	3424314	2103854	3184244	5632292	5735507	6580665	3273636	3180298	1948835	6458344	6271874	5027032	3559657	9664322	2803433	2253523	1785164	1836582	2414174	3666861	5830758	7992725	3995476	2942482	1855960	7337570	6783908	6309150	1972901	1919213	2133961	4719008	3905365	4450138
CSHNEG	Phosphatidylinositols	PI 38:4; PI 18:0-20:4;	Peak height	42607491		CCCCCCCCCCCCCCCCCC(=O)OC[C@H](COP(=O)(O)OC1C([C@@H](C(C(C1O)O)O)O)O)OC(=O)CCC/C=C\C/C=C\C/C=C\C/C=C\CCCCC	KRTOMQDUKGRFDJ-LWFBQQSYSA-N	ONLI_0669	67522184	50196488	61901088	72583000	70213168	76159432	54375500	72040840	57871528	55424228	84999096	68020296	77715440	67067536	74853928	40545536	81321008	84994208	73126648	58457564	97005080	63274884	73996096	56845728	47186820	75239128	55515228	78546160	86226616	69111040	83755952	52171248	87517632	83112584	97666592	66083212	59423328	73500112	74472520	91310744	57510764
CSHNEG	Phosphatidylinositols	PI 38:3; PI 18:0-20:3;	Peak height	52928308		CCCCCCCCCCCCCCCCCC(=O)OC[C@H](COP(=O)(O)OC1C([C@@H](C(C(C1O)O)O)O)O)OC(=O)CCCCCC/C=C\C/C=C\C/C=C\CCCCC	ZUGLBBVIAIBIKG-BZXCBJNASA-N	ONLI_0670	3893545	3743127	2842534	3270210	6503220	6032430	3099538	2875526	2017230	2458990	5531013	7607059	5771936	2319036	3414506	1327074	6068272	6453360	6301702	4354135	15046214	3575651	2691104	2463389	2027814	2879979	3916152	7684792	8817634	3407996	3289123	2339630	5269075	9582251	6922460	2132649	2459950	2551211	4604390	2727401	4999050
CSHNEG	Phosphatidylcholines	PC 40:8; PC 18:2-22:6;	Peak height	24778983		CCCCC/C=C\C/C=C\CCCCCCCC(=O)OC[C@H](COP(=O)([O-])OCC[N+](C)(C)C)OC(=O)CC/C=C\C/C=C\C/C=C\C/C=C\C/C=C\C/C=C\CC	FCTKCFNDGVBOBD-YZXVGOFNSA-N	ONLI_0671	1403665	1137233	817583	959846	1486463	1745386	1076760	952566	595277	852841	1312582	1500347	1495907	1041486	836820	665767	1411878	1342724	1241645	1072694	1614896	988516	1045808	818001	710899	848341	1144045	1715031	1624065	1009527	953626	735908	1668400	1565437	1398987	874479	829671	834157	1459901	995426	1129919
CSHNEG	Phosphatidylcholines	PC 40:7; PC 18:1-22:6;	Peak height	24778955		CCCCCCCC/C=C\CCCCCCCC(=O)OC[C@H](COP(=O)([O-])OCC[N+](C)(C)C)OC(=O)CC/C=C\C/C=C\C/C=C\C/C=C\C/C=C\C/C=C\CC	FPEVDFOXMCHLKL-KFDYCXSYSA-N	ONLI_0672	3208208	2626782	3174864	3548528	3689056	4116310	2487036	3304374	2367465	2315643	3379334	2982249	3900533	3357534	2138660	1506216	3767380	3329109	2815478	2086229	4532476	2712381	2800426	2694752	1939214	2757938	2317702	3926414	3261633	3198078	2892554	2073064	3854113	3707195	4314802	2954961	2705163	3170354	2913890	3907102	2433721
CSHNEG	Phosphatidylcholines	PC 40:6	Peak height	24778900	C00157	CCCCCC/C=C\CCCCCCCCCC(=O)OC[C@H](COP(=O)([O-])OCC[N+](C)(C)C)OC(=O)CCCCC/C=C\C/C=C\C/C=C\C/C=C\C/C=C\CC	FYVNIFOYDIIODX-KNKJIUSSSA-N	ONLI_0673	10398049	8085776	13242342	12226830	10652759	10708040	9939151	12644991	10574336	9273741	10373945	10141896	11282026	11630549	11434137	7087192	11782719	11414178	10095129	8363254	13163940	11245900	13316197	12720206	9640923	13756221	8722448	12007413	11741669	11621728	14714008	10363608	12814452	13074253	15515408	13866378	12915207	14039973	9863085	15417599	9231991
CSHNEG	Phosphatidylcholines	PC 40:5; PC 18:0-22:5;	Peak height	24778873		CCCCCCCCCCCCCCCCCC(=O)OC[C@H](COP(=O)([O-])OCC[N+](C)(C)C)OC(=O)CCCCC/C=C\C/C=C\C/C=C\C/C=C\C/C=C\CC	MAAMGQXOTCBPFS-JPGWWKBXSA-N	ONLI_0674	432551	411494	406851	738036	533178	430709	462437	456500	429550	517948	596578	624406	538995	574139	682846	232532	611088	537082	386450	440449	748121	459948	330944	254172	369917	324067	311181	535338	503990	451309	636914	389216	651411	659932	687169	461778	342954	335307	224918	627921	374217
CSHNEG	Phosphatidylcholines	PC 40:4	Peak height	24779048		CCCCCCCCCCCCCCCCCCCC(=O)OC[C@H](COP(=O)([O-])OCC[N+](C)(C)C)OC(=O)CCC/C=C\C/C=C\C/C=C\C/C=C\CCCCC	UAVRPIXHIHJERN-CBTSKTMBSA-N	ONLI_0675	738676	570748	85708	106472	596845	559562	721552	104474	79787	117368	641274	615800	666423	94452	92069	119311	791023	901696	574422	579173	740036	99171	127762	87170	96780	130567	729258	904563	798831	113535	142226	130593	843607	863791	937482	118919	118391	117966	536239	121431	641677
CSHNEG	Phosphatidylcholines	PC 40:4; PC 18:0-22:4;	Peak height	52923573	C00157	CCCCC/C=C\C/C=C\CCCCCCCCCCCC(=O)OC[C@H](COP(=O)([O-])OCC[N+](C)(C)C)OC(=O)CCCCCCC/C=C\C/C=C\CCCCC	QQIYXJBHMDYXHH-NMUBDWGHSA-N	ONLI_0676	233043	248580	245421	363123	284322	254558	280149	315433	232599	273264	337689	331463	382256	329582	401060	167591	358193	350721	299289	259828	469913	319665	274967	245592	243098	326643	232255	299031	316985	336991	381207	281308	326010	408666	336230	314440	233135	289862	213264	372304	311987
CSHNEG	Phosphatidylinositols	PI 39:4; PI 19:0-20:4;	Peak height	52927893		CCCCCCCCCCCCCCCCCCC(=O)OC[C@H](COP(=O)(O)OC1C([C@@H](C(C(C1O)O)O)O)O)OC(=O)CCC/C=C\C/C=C\C/C=C\C/C=C\CCCCC	UNISCSAECSQMPE-LSUZBHEKSA-N	ONLI_0677	832843	744542	258388	346600	813581	853230	2468941	298515	380112	319943	918805	557531	714465	296769	486412	583571	958794	1141416	833127	944983	1126650	417855	404827	380161	681275	340825	818408	908211	903397	365160	390846	466332	1292893	876613	878918	284682	411086	253863	1096696	345976	2295440
CSHNEG	Phosphatidylinositols	PI 40:6; PI 18:0-22:6;	Peak height	52927465		CCCCCCCCCCCCCCCCCC(=O)OC[C@H](COP(=O)(O)OC1C([C@@H](C(C(C1O)O)O)O)O)OC(=O)CC/C=C\C/C=C\C/C=C\C/C=C\C/C=C\C/C=C\CC	DJVOKHFQPGWUPK-PNBUVQRSSA-N	ONLI_0679	1708492	1499552	1409288	1700479	2119308	2108557	1173023	1583277	1446547	1446928	1912845	2243927	2252664	1305910	1866652	1110194	2419745	2205945	2406032	1451826	2907277	1659078	1852331	1406924	1298073	1493591	1693205	2205325	2354622	1612362	1779686	1340139	2548071	2468675	2625071	1233646	1283088	1595897	2132982	1736490	1578455
CSHNEG	Phosphatidylinositols	PI 40:5; PI 18:0-22:5;	Peak height	53480067		CCCCCCCCCCCCCCCCCC(=O)OC[C@H](COP(=O)(O)OC1C([C@@H](C(C(C1O)O)O)O)O)OC(=O)CCCCC/C=C\C/C=C\C/C=C\C/C=C\C/C=C\CC	QLABQLNIHHHJCI-FCGLMCRWSA-N	ONLI_0680	386211	346543	242746	293840	586845	669458	390200	286995	218422	235799	684204	638847	661467	226560	322029	172675	622913	629090	533222	321454	1072390	307591	201460	229346	157633	274991	334998	648679	707940	333495	375574	209568	663440	865890	768321	192700	191463	245193	486678	341553	432685
CSHNEG	Phosphatidylinositols	PI 40:4; PI 20:0-20:4;	Peak height	52928284		CCCCCCCCCCCCCCCCCCCC(=O)OC[C@H](COP(=O)(O)OC1C([C@@H](C(C(C1O)O)O)O)O)OC(=O)CCC/C=C\C/C=C\C/C=C\C/C=C\CCCCC	FPYBELXGPLJKPW-NGNRSKJCSA-N	ONLI_0682	659619	220249	429020	1104491	489740	1283913	195080	452818	448840	374909	1172918	545570	957358	218751	1120025	102235	1439776	1779755	1312512	568173	4475567	540510	602713	133396	131788	456119	277701	951202	2402021	319892	1321652	136271	1445849	2540726	2096534	347964	135120	179303	360450	690827	275268
CSHNEG	Phosphatidylcholines	PC 42:7; PC 20:1-22:6;	Peak height	52923147		CCCCCCCC/C=C\CCCCCCCCCC(=O)OC[C@H](COP(=O)([O-])OCC[N+](C)(C)C)OC(=O)CC/C=C\C/C=C\C/C=C\C/C=C\C/C=C\C/C=C\CC	FYVDGOCCFDKYOR-OEQCKVCZSA-N	ONLI_0683	257208	284844	124499	184669	314467	320085	246745	113527	107582	99639	259462	323371	333703	131516	81378	83063	399291	342147	249733	222509	438321	128857	143032	107473	105946	78442	269089	412908	391337	131557	127491	88364	468628	440619	450080	88614	111247	143551	243654	189140	343731
HILICPOS	Acyl carnitines	2R-3-Hydroxyisovaleroylcarnitine	Peak height	131668011		CC(C)(CC(=O)O[C@H](CC(=O)[O-])C[N+](C)(C)C)O	IGLHHSKNBDXCEY-SECBINFHSA-N	ONLI_0702	2979439	2287086	2327477	2456197	2559562	1532277	3384234	2333622	1792287	2010397	2282019	1064821	1532319	2832463	2034707	1919019	1848038	2569836	1444156	2479681	1867042	1641621	2346917	2331617	2089436	2659385	1981365	1616477	2250105	2249340	2316641	1624625	2124071	1401590	2016785	2623970	2810757	1948332	1642685	1957027	1762970
HILICPOS	Acyl carnitines	R-Butyrylcarnitine	Peak height	213144	C02862	CCCC(=O)O[C@H](CC(=O)[O-])C[N+](C)(C)C	QWYFHHGCZUCMBN-SECBINFHSA-N	ONLI_0703	12386613	10583536	11201301	15640643	13992411	11771335	20618696	19957138	37553488	11119919	11147153	14689304	12020806	15767636	15893906	25059598	18101766	13109158	11797074	15867901	28477614	13899022	13384595	8026876	13700505	13766500	15519116	17613040	26977200	15299652	23834840	20322798	19192696	16105468	15318038	22318078	16333157	17277368	10051399	12955730	26952758
HILICPOS	Pyrrolidinylpyridines	S-Cotinine N-oxide	Peak height	9815514		CN1[C@@H](CCC1=O)C2=C[N+](=CC=C2)[O-]	CIPULDKLIIVIER-VIFPVBQESA-N	ONLI_0704	34530	49100	47091	53892	38060	33387	71946	92314	83842	14998	104090	28084	15834	30197	44555	113766	27329	33492	29294	27573	29446	29136	34164	27984	33769	28155	28221	31889	15419	29285	30643	28902	15294	30996	27974	38841	24734	27361	27006	29807	207599
HILICPOS	Histidine and derivatives	1-Methyl-L-histidine	Peak height	92105	C01152	CN1C=C(N=C1)C[C@@H](C(=O)O)N	BJHIKXHVCXFQLS-OTWZMJIISA-N	ONLI_0705	771457	609676	517501	757174	752604	1043116	539487	570157	335130	365976	773460	604631	642810	479480	361696	273292	842399	794160	663508	560026	727691	433854	402144	452595	183537	732586	922164	694348	865087	425100	450606	215855	737114	621532	773861	438036	322600	433926	780752	455383	319568
HILICPOS	Indolines	2-Indolinone	Peak height	321710	C12312	C1C2=CC=CC=C2NC1=O	JYGFTBXVXVMTGB-UHFFFAOYSA-N	ONLI_0706	1934990	2740587	2586188	5755736	2041796	2733366	906920	4633952	8226247	6866592	1714533	1986884	1701937	6439798	4528878	3763428	1576208	1977158	2836670	749994	2094421	2514449	3787307	4485192	2195129	2748169	2594192	696068	1560227	3218135	8334324	3514738	462830	2325060	1055138	4837405	1308998	1701582	1250705	3549378	1862068
HILICPOS	Acyl carnitines	3-Hydroxybutyrylcarnitine	Peak height	90659885		CC(CC(=O)O[C@H](CC(=O)[O-])C[N+](C)(C)C)O	UEFRDQSMQXDWTO-YGPZHTELSA-N	ONLI_0707	3050656	2524055	4846952	2617840	2525936	2783501	3241648	2350991	1397026	1188112	3954042	2105198	2233566	1749397	928286	2203606	2708305	2385002	2660062	2414732	3053084	1097413	1861812	2356093	1683471	3984516	2012908	2126220	2592805	1328729	1698552	876607	2636342	1981040	2346773	1577178	4790996	757137	2257252	4899053	2869212
HILICPOS	Fatty alcohols	4-Hydroxynonenal	Peak height	5283344	C21642	CCCCCC(/C=C/C=O)O	JVJFIQYAHPMBBX-FNORWQNLSA-N	ONLI_0708	45322	44037	55483	47255	46510	55715	69835	62728	59193	56905	63242	33693	40370	64991	64129	52459	47502	44825	44630	51961	61321	54876	52543	87452	49568	48383	49687	52728	306231	54048	63356	36523	57696	40722	80618	56248	62011	67550	63536	47364	51895
HILICPOS	Hydroxyindoles	5-Hydroxytryptophol	Peak height	9061		C1=CC2=C(C=C1O)C(=CN2)CCO	KQROHCSYOGBQGJ-UHFFFAOYSA-N	ONLI_0710	19390720	40905540	23628558	72591504	77693912	24105028	101590112	102410544	91751792	2460166	65912096	7064926	4569488	4350325	34753264	117967680	2377918	6559548	3676856	3589498	9029901	5666921	26440018	5041357	9983410	4256112	3635254	8272988	2204326	5614036	6929348	2928294	3453930	1571259	10792389	30823042	4458951	5280216	3501026	4611846	24194802
HILICPOS	Hydroxypyrimidines	5-Methylcytosine	Peak height	65040	C02376	CC1=C(NC(=O)N=C1)N	LRSASMSXMSNRBT-UHFFFAOYSA-N	ONLI_0711	90388	118930	109974	79646	162578	88681	111420	102728	79471	97079	92287	100664	126298	123924	82981	106579	100291	93772	96426	122985	94032	96414	86896	122885	101930	103762	110874	97542	98211	119671	83168	98859	89958	90929	91749	108153	110399	104018	98256	99697	157458
HILICPOS	Dihydroxy bile acids, alcohols and derivatives	7-Keto-3a,12-a-dihydroxycholanic acid	Peak height	188292	C04643	C[C@H](CCC(=O)O)[C@H]1CC[C@@H]2[C@@]1([C@H](C[C@H]3[C@H]2C(=O)C[C@H]4[C@@]3(CC[C@H](C4)O)C)O)C	RHCPKKNRWFXMAT-RRWYKFPJSA-N	ONLI_0712	20033	13756	13915	64463	10582	11474	0	32805	0	0	0	10605	0	0	0	0	12677	0	0	148406	22693	0	0	0	0	0	0	0	0	0	0	27353	0	0	0	0	0	0	0	0	0
HILICPOS	Dipeptides	Arg-Ala	Peak height	4198036		CC(C(=O)O)NC(=O)C(CCCN=C(N)N)N	WVRUNFYJIHNFKD-UHFFFAOYSA-N	ONLI_0714	85242	118786	47034	56570	114287	100849	132578	70561	96882	47554	51918	74052	61712	57235	37518	99555	75104	69220	73291	87603	95250	58463	59638	78769	51293	68289	98882	70038	58703	75144	122150	76778	71275	60185	60935	83907	47143	105243	68827	42918	60005
HILICPOS	Dipeptides	Arg-Gly	Peak height	5074903		C(CC(C(=O)NCC(=O)O)N)CN=C(N)N	XUUXCWCKKCZEAW-UHFFFAOYSA-N	ONLI_0717	82617	100473	55764	110962	110314	105150	128926	71236	128186	51671	88870	70909	81983	81785	37489	91984	126331	98609	72286	84083	74826	41791	99185	83562	70662	70850	128957	71959	68998	85002	109731	113720	94081	64681	96307	146261	96075	76322	130892	50056	80873
HILICPOS	Dipeptides	Arg-Ser	Peak height	9943142		C(CC(C(=O)NC(CO)C(=O)O)N)CN=C(N)N	IJYZHIOOBGIINM-UHFFFAOYSA-N	ONLI_0720	6747	26552	5967	0	7826	6476	7968	0	7738	6671	6800	0	7780	0	0	8688	0	8160	0	9854	0	0	6937	13751	6574	7931	0	0	0	0	6068	0	5658	0	5733	9250	6675	8596	0	7042	5982
HILICPOS	Dipeptides	Arg-Val	Peak height	335257		CC(C)C(C(=O)O)NC(=O)C(CCCN=C(N)N)N	DAQIJMOLTMGJLO-UHFFFAOYSA-N	ONLI_0722	0	10384	8908	10812	7171	0	0	12022	14467	0	8846	0	0	0	7203	10578	0	0	6879	0	0	6574	9255	8006	0	0	9328	10333	0	0	6334	11260	0	0	0	0	5707	0	0	0	0
HILICPOS	Dipeptides	Glu-Arg	Peak height	9796450		C(C[C@@H](C(=O)O)NC(=O)[C@H](CCC(=O)O)N)CN=C(N)N	MPZWMIIOPAPAKE-BQBZGAKWSA-N	ONLI_0729	120395	181391	170314	147984	168441	127451	122874	159780	190360	124428	79437	157514	104801	95720	96622	164382	146920	141875	184289	138190	173622	146818	151673	180599	102488	141422	217956	169385	211011	97306	205543	133793	128045	128905	115920	168182	98160	139787	136227	90977	117056
HILICPOS	Gluconolactones	Gluconolactone	Peak height	7027	C00198	C([C@@H]1[C@H]([C@@H]([C@H](C(=O)O1)O)O)O)O	PHOQVHQSTUBQQK-SQOUGZDYSA-N	ONLI_0730	1089536	748379	795768	1136260	943662	860779	1030302	870299	1046355	996257	1261538	925929	983568	1411754	1233906	696411	930946	971026	1370619	940744	546327	1129645	1122410	1025517	1389764	1137613	867986	1251967	828820	928256	1197802	1074404	1071856	724044	1189962	1099353	1100895	1102116	1177372	988593	1138009
HILICPOS	Dipeptides	Glu-Lys	Peak height	7015703	C04700	C(CC[NH3+])C[C@@H](C(=O)[O-])NC(=O)[C@H](CCC(=O)[O-])[NH3+]	BBBXWRGITSUJPB-YUMQZZPRSA-N	ONLI_0731	211555	198694	334171	330039	262875	223251	228582	273930	305690	158172	215969	191643	114414	208405	163745	197108	275149	225546	254619	188641	238232	319740	333870	284076	156008	326742	339843	258544	299888	180609	294416	226558	231399	212567	175639	338306	206472	182419	215652	195090	118607
HILICPOS	Dipeptides	Glu-Phe	Peak height	18653118		C1=CC=C(C=C1)C[C@@H](C(=O)O)NC(=O)[C@H](CCC(=O)O)N	XMBSYZWANAQXEV-QWRGUYRKSA-N	ONLI_0732	195012	365930	240914	334497	312298	273924	256581	237289	469654	280101	216194	289278	260138	162226	179804	435066	264944	270833	296402	356114	388023	222040	243450	325538	254520	206795	416838	321100	289018	253474	246048	327922	226196	245804	186322	220084	166045	217141	342411	180760	288541
HILICPOS	Glycerophosphocholines	Glycerophosphocholine	Peak height	71920	C03404	C[N+](C)(C)CCOP(=O)([O-])OC[C@H](CO)O	SUHOQUVVVLNYQR-QMMMGPOBSA-N	ONLI_0733	36307588	60853864	66446484	69398816	84521184	71133616	80077256	112230152	72303712	62271336	62360504	66043404	56672512	57838912	84024376	84776392	56073768	72843968	52569500	39400492	72796328	64591548	59792632	63100832	64490320	69624344	54500356	57194160	56124240	80979056	95462800	71289352	47631244	45082672	40677136	66212052	64937876	91197840	55129456	94206576	78781856
HILICPOS	Peptides	Glycyl-leucine	Peak height	92843	C02155	CC(C)C[C@@H](C(=O)O)NC(=O)CN	DKEXFJVMVGETOO-LURJTMIESA-N	ONLI_0734	740444	996658	775116	958414	844355	839780	712719	765662	686041	764947	581154	646472	629410	972441	650325	1202811	582443	763709	646158	516399	747458	750416	801920	931511	696802	811351	845891	702314	578511	824257	965801	823340	508984	547320	489818	874493	773863	713491	641030	615978	518069
HILICPOS	Acyl carnitines	Hexanoyl-L-carnitine	Peak height	3246938		CCCCCC(=O)O[C@H](CC(=O)[O-])C[N+](C)(C)C	VVPRQWTYSNDTEA-LLVKDONJSA-N	ONLI_0735	1098478	651465	1447366	1444938	1642805	780841	1903578	2037532	737425	738711	1327552	895852	717212	1460244	591466	726077	839149	999432	738025	1689482	1019853	878355	1192984	920582	1407881	1746374	573383	1158068	1210320	841162	589219	407678	1018988	984739	1922176	1886203	1931228	786809	574551	1584473	628042
HILICPOS	Acyl carnitines	Isovaleryl-L-carnitine	Peak height	6426851	C20826	CC(C)CC(=O)OC(CC(=O)[O-])C[N+](C)(C)C	IGQBPDJNUXPEMT-UHFFFAOYSA-N	ONLI_0739	2523983	2583556	2465102	2529592	2027381	2056361	3118724	3004385	4162306	2427983	2018848	1991223	1857560	2347961	2504850	3814265	2482099	2066362	2102763	3427605	2851686	2148346	2819186	1887999	2776456	3433379	2364107	2090178	3068114	2907775	3649562	3179734	2904843	2305141	2450995	2974060	2743402	2789591	2785023	2537133	2573591
HILICPOS	Acyl carnitines	Lauroyl-L-carnitine	Peak height	168381		CCCCCCCCCCCC(=O)O[C@H](CC(=O)[O-])C[N+](C)(C)C	FUJLYHJROOYKRA-QGZVFWFLSA-N	ONLI_0740	81945	52776	102869	68707	128695	59005	95989	133669	41197	51622	97687	75704	61128	99806	56258	36867	54765	70181	61231	138970	64060	68641	80546	66702	86310	95911	48420	73458	78863	67053	46604	47498	67901	56524	85129	126058	106727	55589	45202	104823	60003
HILICPOS	Oligopeptides	L-Cysteine-glutathione disulfide	Peak height	53477713		C(CC(=O)N[C@@H](CSSCC(C(=O)O)N)C(=O)NCC(=O)O)[C@@H](C(=O)O)N	BNRXZEPOHPEEAS-PPSBICQBSA-N	ONLI_0742	134122	69484	127667	209530	122896	131383	52196	172409	208637	114258	119160	109999	57879	58451	109962	62027	139136	170090	112722	69622	128043	73269	118168	65902	31733	84710	112429	115333	110029	66102	133564	46748	112456	91569	144029	101567	43759	56948	86921	106286	54444
HILICPOS	Dipeptides	Leu-Arg	Peak height	3800205		CC(C)CC(C(=O)NC(CCCN=C(N)N)C(=O)O)N	SENJXOPIZNYLHU-UHFFFAOYSA-N	ONLI_0744	37659	51177	34807	28204	47257	45032	35481	49171	41305	42765	48870	34141	33705	29629	32298	46937	44416	30076	31166	30084	31768	34427	32770	36110	42106	51537	41984	35492	31614	32723	40245	49398	34369	25522	26097	33879	31244	15360	25519	24036	24631
HILICPOS	Dipeptides	Leu-Pro	Peak height	80817		CC(C)C[C@@H](C(=O)N1CCC[C@H]1C(=O)O)N	VTJUNIYRYIAIHF-IUCAKERBSA-N	ONLI_0745	745371	882845	934714	1005804	1168703	973519	1012598	978753	690710	673454	924802	738092	756257	972928	854490	923813	678173	683962	831248	687154	818905	828083	797748	832681	623718	859350	830012	751325	779102	868765	891393	600935	687480	656370	873246	835570	722760	710610	743636	662014	719950
HILICPOS	L-alpha-amino acids	L-Homocitrulline	Peak height	65072	C02427	C(CCNC(=O)N)C[C@@H](C(=O)O)N	XIGSAGMEBXLVJJ-YFKPBYRVSA-N	ONLI_0746	92079	133606	113763	166595	121723	122663	102590	132443	165092	174171	129928	102178	120541	144802	102868	154367	145985	126333	113507	84566	145207	141512	152955	112395	118982	192724	138441	117581	168492	147849	250260	100861	107664	95194	113394	133319	95088	110305	101925	111232	105134
HILICPOS	Acyl carnitines	Linoleoylcarnitine	Peak height	6450015		CCCCC/C=C\C/C=C\CCCCCCCC(=O)O[C@H](CC(=O)[O-])C[N+](C)(C)C	MJLXQSQYKZWZCB-DQFWFXSYSA-N	ONLI_0747	212859	124448	288089	223627	372072	139205	238143	344802	98720	151245	201151	159423	182337	194164	118113	101931	178809	165075	132391	330217	136719	164548	242844	244218	237217	294830	108894	203671	157140	191617	117456	91418	177410	111034	234796	363639	247025	140903	170194	245156	84702
HILICPOS	Dipeptides	Lys-Gly	Peak height	259320		C(CCN)CC(C(=O)NCC(=O)O)N	HGNRJCINZYHNOU-UHFFFAOYSA-N	ONLI_0749	20506	7735	10307	12904	10264	10928	9798	11669	12575	24860	24253	11632	8053	9246	11846	26526	20954	20899	22200	9869	10107	7963	9322	9778	8874	12014	12033	7720	10644	6725	13568	9414	9091	9414	10918	10845	6740	9906	10180	10273	11982
HILICPOS	Dipeptides	Lys-Val	Peak height	140709		CC(C)C(C(=O)O)NC(=O)C(CCCCN)N	YQAIUOWPSUOINN-UHFFFAOYSA-N	ONLI_0750	457497	528583	511502	610229	913629	574737	624471	691598	477850	287005	596277	369945	318285	496179	426102	477959	346178	498771	362017	329182	304474	344082	344688	388841	216921	378724	408020	400915	310119	354018	449023	222370	339197	236075	333080	492288	282964	295396	319132	418203	228618
HILICPOS	N-acyl-L-alpha-amino acids	N-.alpha.-Acetyl-L-arginine	Peak height	67427		CC(=O)N[C@@H](CCCN=C(N)N)C(=O)O	SNEIUMQYRCDYCH-LURJTMIESA-N	ONLI_0751	977692	1465528	1112722	914876	1299922	929919	1147387	966670	1088770	1301916	917033	1147096	1408861	696385	1056726	1847802	1112128	937453	1169266	1270875	1599006	1094966	976856	966589	1370528	951094	1762619	1487961	1415674	1428670	1377750	1410850	1337412	1342786	766549	957915	939775	973625	1631017	779700	1528943
HILICPOS	N-acyl-alpha amino acids	N.alpha.-Acetyl-L-lysine	Peak height	192590	C12989	CC(=O)NC(CCCCN)C(=O)O	VEYYWZRYIYDQJM-UHFFFAOYSA-N	ONLI_0752	740444	996658	775116	958414	844355	839780	712719	765662	686041	764947	581154	646472	629410	972441	650325	1202811	582443	763709	646158	516399	747458	750416	801920	931511	696802	811351	845891	702314	578511	824257	965801	823340	508984	547320	489818	874493	773863	713491	641030	615978	518069
HILICPOS	L-alpha-amino acids	N.alpha.-Methyl-L-lysine	Peak height	7010497		CN[C@@H](CCCCN)C(=O)O	OLYPWXRMOFUVGH-LURJTMIESA-N	ONLI_0753	770541	1104167	895462	1074164	1029676	898446	1225941	1158689	958963	1007903	878127	783081	874348	1076268	779724	1393894	677894	1293819	1117692	928368	920121	1129923	885693	892469	1181665	1248278	1274043	994742	1000068	1085675	1650500	1041285	922719	748538	515026	800552	785916	907966	1042648	739567	990952
HILICPOS	Hybrid peptides	N-Acetyl-L-carnosine	Peak height	10221026		CC(=O)NCCC(=O)N[C@H](CC1=CN=CN1)C(=O)O	BKAYIFDRRZZKNF-SECBINFHSA-N	ONLI_0754	33190	30833	8725	12866	37352	27117	44055	22519	8403	11038	37081	24101	25333	25772	10054	8318	14349	47931	23654	13437	44849	12069	9471	0	0	6371	29199	22838	27077	9673	11811	7385	14224	24271	34985	0	10560	6550	25945	23779	25659
HILICPOS	N-acyl-L-alpha-amino acids	N-alpha-Acetyl-L-ornithine	Peak height	439232	C00437	CC(=O)N[C@@H](CCCN)C(=O)O	JRLGPAXAGHMNOL-LURJTMIESA-N	ONLI_0756	1485396	1708247	1394958	2466082	1807584	1232847	1611020	1604299	1990718	1793157	1206040	1292205	1242290	1174539	1774324	1988957	1399671	1177468	1461776	1163353	1321680	1390864	1658262	1403377	1122955	1625042	1614497	1052044	1303157	1706920	2084583	1551626	1593440	1459872	951570	1688950	1520824	1574272	1458366	984026	1751323
HILICPOS	L-alpha-amino acids	NEPSILON,NEPSILON,NEPSILON-TRIMETHYLLYSINE	Peak height	440120	C03793	C[N+](C)(C)CCCC[C@@H](C(=O)[O-])N	MXNRLFUSFKVQSK-QMMMGPOBSA-N	ONLI_0757	12011654	12018419	11989828	16273984	18484570	11444447	11429915	13938083	17213884	11886034	12138230	11469691	11424411	13653900	10487309	17710960	11278485	15263758	12129695	9933674	11094601	10393674	9422536	9360849	9628214	11382012	14746397	10855226	11069878	12083017	14430123	10388550	11054885	10910137	10123410	14242158	9559568	9706858	14830655	11671192	9141238
HILICPOS	Glycosylamines	Nicotinamide riboside cation	Peak height	439924	C03150	C1=CC(=C[N+](=C1)[C@H]2[C@@H]([C@@H]([C@H](O2)CO)O)O)C(=O)N	JLEBZPBDRKPWTD-TURQNECASA-O	ONLI_0760	132440	151086	300482	279522	294729	231277	232565	379135	250550	338282	241276	186977	214059	264611	179696	220317	102978	182729	195443	187367	192266	185185	387043	240335	540533	200231	182275	199163	173998	339891	306851	189562	156639	106895	196516	343212	195534	220100	214671	454843	108087
HILICPOS	Alpha amino acids	O-Acetyl-L-homoserine	Peak height	528	C01077	CC(=O)OCCC(C(=O)O)N	FCXZBWSIAGGPCB-UHFFFAOYSA-N	ONLI_0761	11368	13550	0	11434	12933	15234	35671	11470	14124	12000	9174	10848	0	11599	8370	19517	28540	10575	15079	12822	13214	13667	14638	18746	10635	27035	14802	12861	12100	11157	10512	28437	8174	10210	11102	12257	11662	16090	36500	12578	11382
HILICPOS	N-acyl-alpha amino acids	Phenylacetylglutamine	Peak height	92258	C04148	C1=CC=C(C=C1)CC(=O)N[C@@H](CCC(=O)N)C(=O)O	JFLIEFSWGNOPJJ-JTQLQIEISA-N	ONLI_0763	290770	489869	264597	293615	420649	340468	559875	363243	326073	299563	344108	431360	419733	490196	341706	517594	309902	338484	355577	435722	326545	411104	373537	496126	562891	433778	337039	398366	329281	510354	310319	518215	341540	369452	352079	419680	520469	465508	418288	423597	575720
HILICPOS	Pyridoxals and derivatives	Pyridoxal	Peak height	1050	C00250	CC1=NC=C(C(=C1O)C=O)CO	RADKZDMFGJYCBB-UHFFFAOYSA-N	ONLI_0765	82432	140331	188119	327599	153911	160805	94433	263283	380147	395317	162801	165757	162800	213481	294900	309958	155965	171132	155039	142290	204819	243692	243056	157287	199436	224587	181482	129403	156146	298576	373738	246757	133974	135286	115431	253463	144441	220198	145762	200713	178921
HILICPOS	Dipeptides	Ser-Glu	Peak height	3613616		C(CC(=O)O)C(C(=O)O)NC(=O)C(CO)N	LAFKUZYWNCHOHT-UHFFFAOYSA-N	ONLI_0766	72743	109275	141537	156339	90776	96054	63835	101504	177717	96110	100470	107279	89188	72363	100522	97773	112031	129326	123750	97982	174359	90419	132594	144059	78787	91380	154644	127336	127109	83457	119063	114112	83696	105136	101106	99893	76446	110467	85159	60351	85345
HILICPOS	Dipeptides	Ser-His	Peak height	7016093		C1=C(NC=N1)C[C@@H](C(=O)[O-])NC(=O)[C@H](CO)[NH3+]	YZMPDHTZJJCGEI-BQBZGAKWSA-N	ONLI_0767	7172	0	0	0	0	0	0	0	0	0	0	0	0	0	0	0	0	6162	0	0	0	0	0	0	0	0	0	0	0	0	0	0	0	0	0	0	0	0	0	0	0
HILICPOS	Dipeptides	Ser-Lys	Peak height	16122513		C(CCN)C[C@@H](C(=O)O)NC(=O)[C@H](CO)N	SBMNPABNWKXNBJ-BQBZGAKWSA-N	ONLI_0768	6454	0	0	0	5651	5490	0	0	0	0	5414	0	0	6513	0	6128	0	6089	0	0	0	0	0	0	0	0	6287	0	0	0	5380	0	0	5137	0	5666	0	0	0	0	0
HILICPOS	Dipeptides	Ser-Tyr	Peak height	4575735		C1=CC(=CC=C1CC(C(=O)O)NC(=O)C(CO)N)O	MALNXHYEPCSPPU-UHFFFAOYSA-N	ONLI_0770	20692	9762	23846	10788	23923	24086	37364	13857	28701	21938	13237	9887	9045	9377	9810	29451	11781	11143	24101	12196	21757	10217	10804	13592	12282	8655	27889	12834	30065	7537	13495	12800	12689	11036	14035	10995	8824	8852	24405	11083	10380
HILICPOS	Dialkylamines	Spermidine	Peak height	1102	C00315	C(CCNCCCN)CN	ATHGHQPFGPMSJY-UHFFFAOYSA-N	ONLI_0772	805868	460671	310654	477711	1323789	998452	1198960	923469	829257	903922	750548	1175762	386363	594636	1268732	397790	880949	796365	593501	826085	610107	1360416	871152	925317	952027	1630596	534046	1135680	1245072	642597	687587	1165910	468281	956647	936492	901692	1067960	1069285	1001322	1082364	1155770
HILICPOS	Proline and derivatives	Stachydrine	Peak height	115244	C10172	C[N+]1(CCC[C@H]1C(=O)[O-])C	CMUNUTVVOOHQPW-LURJTMIESA-N	ONLI_0773	44529304	68566680	56993976	70718304	69848248	49899936	44169648	50279208	75058712	81344896	23887078	47016076	57243504	26777322	36740264	88922192	36900912	123600232	100284112	67443672	47922164	74368784	59034592	62505008	108114656	74959688	84961920	71201864	67534040	84957616	117992272	80098336	46588844	42935964	24574928	38965588	32737198	19677780	83142672	32478120	57976284
HILICPOS	Acyl carnitines	Stearoyl-L-carnitine	Peak height	52922056		CCCCCCCCCCCCCCCCCC(=O)O[C@H](CC(=O)[O-])C[N+](C)(C)C	FNPHNLNTJNMAEE-HSZRJFAPSA-N	ONLI_0774	68921	49239	56353	48587	46236	51111	78619	64370	31696	35159	43869	47885	53409	54940	39317	50305	49032	39797	34178	47385	49619	40996	50806	78225	45692	81952	58269	53041	46907	41201	52446	53655	45322	31984	40641	53705	63744	54130	45216	72132	44051
HILICPOS	Dipeptides	Thr-Ala	Peak height	18218243		CC(C(C(=O)NC(C)C(=O)O)N)O	VPZKQTYZIVOJDV-UHFFFAOYSA-N	ONLI_0776	55104	57987	51875	56942	65290	49943	74205	43110	52028	40228	63724	58315	48015	35834	40980	69025	56739	62436	48036	62902	56545	48650	43077	53370	40782	47293	78561	56464	47100	47324	63566	47868	43464	42798	36129	44216	42975	39604	46408	42966	55091
HILICPOS	Dipeptides	Thr-Arg	Peak height	7016110	C00762	C[C@H]([C@@H](C(=O)N[C@@H](CCCN=C(N)N)C(=O)O)N)O	HYLXOQURIOCKIH-VQVTYTSYSA-N	ONLI_0777	0	0	0	0	0	0	0	0	0	0	0	0	0	0	0	0	0	0	0	0	0	0	0	0	0	0	0	0	0	0	0	0	0	0	0	5866	0	0	0	0	0
HILICPOS	Pyrrolidinylpyridines	trans-3'-Hydroxycotinine	Peak height	10219774		CN1[C@@H](CC(C1=O)O)C2=CN=CC=C2	XOKCJXZZNAUIQN-IENPIDJESA-N	ONLI_0780	20664	29888	14463	11290	18403	23929	22438	14155	15332	14652	27162	25362	15022	14154	12927	15927	12549	12142	11169	11400	12790	14233	12798	13704	24403	12443	13718	15305	13214	12102	14387	13446	13503	11660	12673	14430	12674	22491	14654	12563	15179
HILICPOS	Tryptamines and derivatives	Tryptamine	Peak height	1150	C00398	C1=CC=C2C(=C1)C(=CN2)CCN	APJYDQYYACXCRM-UHFFFAOYSA-N	ONLI_0781	456144	563357	1036076	1231355	623402	897660	513128	1219414	1035072	1133288	710262	653894	936012	1034659	819043	1317170	753865	686879	720453	744257	985135	1179756	1747830	1319750	1095139	1521039	875176	622054	784829	1180108	1682921	1769021	659158	637918	786870	1288566	1171856	1458978	1028775	1104712	697028
HILICPOS	Dipeptides	Val-Gln	Peak height	5253209		CC(C)C(C(=O)NC(CCC(=O)N)C(=O)O)N	XXDVDTMEVBYRPK-UHFFFAOYSA-N	ONLI_0784	0	0	0	0	0	0	7086	8909	8048	0	0	7271	0	0	0	0	7540	0	7338	0	6580	0	8335	8422	0	0	9490	0	6714	0	0	0	7046	0	0	8066	0	9375	0	0	0
HILICPOS	Xanthines	Xanthine	Peak height	1188	C00385	C1=NC2=C(N1)C(=O)NC(=O)N2	LRFVTYWOQMYALW-UHFFFAOYSA-N	ONLI_0787	0	11890	0	15226	86461	0	92464	0	50484	0	70166	0	0	0	0	0	0	0	0	0	30699	8871	0	0	13582	0	0	0	0	0	0	0	0	0	0	0	0	0	0	7726	0
HILICPOS	Purine nucleosides	1-Methyladenosine	Peak height	27476	C02494	CN1C=NC2=C(C1=N)N=CN2[C@H]3[C@@H]([C@@H]([C@H](O3)CO)O)O	GFYLSDSUCHVORB-IOSLPCCCSA-N	ONLI_0788	1621982	1695372	1994602	2313660	2371804	1208752	2707999	2577826	1632819	1615113	1783226	1354873	1646827	2703752	1984853	2489598	1549872	1982970	1370296	1617618	1979607	1770636	1832707	1870138	1500490	1983320	1501123	1551670	1257816	2149036	2248864	1579576	1531284	1185797	1614001	2596594	1862076	1369678	1275199	2066482	1363618
HILICPOS	Purine nucleosides	1-Methylguanosine	Peak height	96373	C04545	CN1C(=O)C2=C(N=C1N)N(C=N2)[C@H]3[C@@H]([C@@H]([C@H](O3)CO)O)O	UTAIYTHAJQNQDW-KQYNXXCUSA-N	ONLI_0789	211512	135287	332344	257691	195279	159741	210353	214247	148508	247870	184718	138144	167609	238008	200672	167349	150133	223652	186634	160182	191315	207494	156773	154002	145557	203361	233783	142753	153002	185436	189689	151403	127762	130689	171574	269507	185774	138180	152451	183289	108433
HILICPOS	Guanidines	3-Guanidinopropionic acid	Peak height	67701	C03065	C(CN=C(N)N)C(=O)O	KMXXSJLYVJEBHI-UHFFFAOYSA-N	ONLI_0791	310200000	448563456	336807616	351666912	439067008	442164192	431376544	375516256	319501952	306491840	325518368	337914528	324791616	233062176	210951264	426129888	344219296	389942592	333354464	337038784	377657632	308341472	353446464	381636768	246422896	418386016	387320288	309646560	391863872	318306464	410166560	281986528	320834592	347039808	260962224	340430976	277560704	325002624	341587008	303037920	350692384
HILICPOS	1-hydroxy-4-unsubstituted benzenoids	3-Hydroxyphenylacetic acid	Peak height	12122	C05593	C1=CC(=CC(=C1)O)CC(=O)O	FVMDYYGIDFPZAX-UHFFFAOYSA-N	ONLI_0792	7691	17815	7538	11273	15360	27074	9344	15424	0	10633	15867	28015	13020	16338	7837	17219	13821	15980	10990	9438	0	0	12859	15806	26082	0	24829	0	0	20180	25065	0	0	10990	17192	0	0	0	0	0	8916
HILICPOS	Proline and derivatives	3-Hydroxyproline	Peak height	150779		C1CN[C@@H](C1O)C(=O)O	BJBUEDPLEOHJGE-BKLSDQPFSA-N	ONLI_0793	2506859	2922420	1206702	1643747	2813524	2216186	3883045	1428619	1632639	1119890	3032190	2184276	1997381	1493383	1210954	1487425	2896893	3093416	2074933	2593177	1465323	1056172	1115521	1427933	1055230	1270335	3064352	2545766	1851431	1064168	1154289	986688	2357235	1750756	1869715	1570899	1118394	1030182	2874237	605716	2306529
HILICPOS	Delta amino acids and derivatives	5-Aminovaleric acid	Peak height	138	C00431	C(CCN)CC(=O)O	JJMDCOVWQOJGCB-UHFFFAOYSA-N	ONLI_0795	1791380608	1970536192	1892692480	1949891328	1834056576	1814052736	1497477120	1739138560	2499503616	2164530432	1406420992	1915368704	1767766144	1672572672	1793030528	2759088128	1491131136	1746091904	1882707840	1599247872	1869103872	2139627776	1789357312	1925877760	2035661952	1395935744	1864909696	1707561216	1776144128	1741452416	1897668992	1596541952	1419109376	1446473344	1025095424	1292269696	1456116864	1357333376	1910954112	1477437696	1873281280
HILICPOS	Dipeptides	Ala-Ile	Peak height	417358		CCC(C)C(C(=O)O)NC(=O)C(C)N	ZSOICJZJSRWNHX-UHFFFAOYSA-N	ONLI_0798	0	23916	114294	94822	49417	0	28390	74160	96792	79828	81154	0	24816	93184	62311	49707	21405	57901	19973	0	17447	57400	69341	67969	20767	50240	47156	63304	60224	70049	51596	54059	52812	22695	56173	64797	67211	30320	55544	181578	43945
HILICPOS	Alpha amino acids	Betaine	Peak height	247	C00719	C[N+](C)(C)CC(=O)[O-]	KWIUHFFTVRNATP-UHFFFAOYSA-N	ONLI_0799	1791380608	1970536192	1892692480	1949891328	1834056576	1814052736	1497477120	1739138560	2499503616	2164530432	1406420992	1915368704	1767766144	1672572672	1793030528	2759088128	1491131136	1746091904	1882707840	1599247872	1869103872	2139627776	1789357312	1925877760	2035661952	1395935744	1864909696	1707561216	1776144128	1741452416	1897668992	1596541952	1419109376	1446473344	1025095424	1292269696	1456116864	1357333376	1910954112	1477437696	1873281280
HILICPOS	Alpha amino acids and derivatives	Creatinine	Peak height	588	C00791	CN1CC(=O)N=C1N	DDRJAANPRJIHGJ-UHFFFAOYSA-N	ONLI_0801	107943184	130909472	154250080	153474640	133485248	121230136	117528056	149415840	122169776	120975712	114481720	108492536	112921584	179801600	146573680	131963800	110826336	140429552	107650128	90615432	128358264	124976512	127800736	145316512	115126344	140421344	124758744	110562408	102866992	157984768	149738912	100010888	98025528	99456488	112751352	151427280	139429504	110628856	104203216	126271976	88215648
HILICPOS	Pyrimidones	Cytosine	Peak height	597	C00380	C1=C(NC(=O)N=C1)N	OPTASPLRGRRNAP-UHFFFAOYSA-N	ONLI_0802	165464	275472	337961	280619	232382	172097	215227	293944	523556	431008	185785	391673	191625	179443	457544	641323	182605	223700	246372	301573	280449	275062	287989	199785	349760	338104	394834	452761	241205	214087	399354	442160	272446	233561	146216	287963	203723	364044	383902	131985	544292
HILICPOS	Hexoses	Galactosamine	Peak height	24154	C02262	C([C@@H]1[C@@H]([C@@H]([C@H](C(O1)O)N)O)O)O	MSWZFWKMSRAUBD-GASJEMHNSA-N	ONLI_0803	692149	777900	701154	769547	823558	712339	688314	649137	610535	661016	804809	602229	593689	544546	405272	706499	494423	1041490	661569	884648	724904	528622	656034	798934	602937	619396	546630	770484	569223	677328	671388	675695	571989	638792	746713	609017	545659	506661	716832	577086	550626
HILICPOS	Purine nucleosides	N2,N2-Dimethylguanosine	Peak height	135501639		CN(C)C1=NC2=C(C(=O)N1)N=CN2[C@H]3[C@@H]([C@@H]([C@H](O3)CO)O)O	RSPURTUNRHNVGF-IOSLPCCCSA-N	ONLI_0807	44285	16984	44476	22172	22839	21293	49084	28166	15281	25595	26567	42647	26475	76990	42437	20620	25859	51385	21651	26053	24935	32091	41456	23861	23588	29034	26915	45604	26125	50807	13805	0	22452	16596	24579	57900	31062	14639	21339	28984	13003
HILICPOS	Hydroxyindoles	N-Acetyl-5-hydroxytryptamine	Peak height	903	C00978	CC(=O)NCCC1=CNC2=C1C=C(C=C2)O	MVAWJSIDNICKHF-UHFFFAOYSA-N	ONLI_0808	104690	79304	105743	234916	283900	101062	88555	174523	158258	26358	125452	15801	12651	34976	39613	145048	0	31679	0	9499	69107	24553	49250	16423	15481	18452	13459	38128	26402	0	12967	32247	0	18019	27618	60791	12313	41103	18556	21231	20234
HILICPOS	Pyrimidine nucleosides	N-Acetylcytidine	Peak height	107461		CC(=O)NC1=NC(=O)N(C=C1)[C@H]2[C@@H]([C@@H]([C@H](O2)CO)O)O	NIDVTARKFBZMOT-PEBGCTIMSA-N	ONLI_0809	55392	35395	38670	42152	33180	36398	36484	55287	39436	55753	36428	22480	16955	60489	49066	46184	34704	47869	31402	27940	36911	38222	41732	36831	34196	52857	35813	16252	14951	46790	43868	41512	18831	17804	16240	55881	36906	40502	36743	58503	34477
HILICPOS	Acylaminosugars	N-Acetylglucosamine	Peak height	439174	C00140	CC(=O)N[C@@H]1[C@H]([C@@H]([C@H](OC1O)CO)O)O	OVRNDRQMDRJTHS-RTRLPJTCSA-N	ONLI_0810	197784	76599	161057	226992	137435	110136	57204	179789	140349	152303	201359	154704	175837	93266	114930	64515	225832	311878	178970	162201	166326	146077	147778	72453	53720	180706	184586	195633	193254	112666	195241	66678	218784	225240	166683	172143	47947	84016	115277	102507	102868
HILICPOS	Phenylalanine and derivatives	N-Acetylphenylalanine	Peak height	74839	C03519	CC(=O)N[C@@H](CC1=CC=CC=C1)C(=O)O	CBQJSKKFNMDLON-JTQLQIEISA-N	ONLI_0811	124325	254466	221289	266434	449336	348180	147220	240179	597793	363973	168233	195242	237365	254537	290019	651438	298983	422307	279730	337294	285999	260290	274851	282926	313017	251861	373196	274850	399362	433682	394648	466532	196973	309448	118161	261458	255365	254913	362782	244864	264139
HILICPOS	Leucine and derivatives	N-Methylleucine	Peak height	2777993		CC(C)C[C@@H](C(=O)O)NC	XJODGRWDFZVTKW-LURJTMIESA-N	ONLI_0812	181486	161768	293727	166506	171758	104629	46102	92391	219571	236335	34852	32887	52127	37574	38487	62779	49115	44560	33026	31587	34991	40785	40366	43507	32022	34469	31169	310974	355893	33190	382352	279075	321482	214094	567888	208339	415591	282614	459931	663358	42112
HILICPOS	Tyrosine and derivatives	N-Methyltyrosine	Peak height	70652	C03404	COC(=O)[C@H](CC1=CC=C(C=C1)O)N	MWZPENIJLUWBSY-VIFPVBQESA-N	ONLI_0813	26159	42358	27472	23872	36501	12747	30148	24810	56060	32759	23037	28296	18905	22245	18146	63362	26294	25345	26584	22552	26991	20654	26531	14775	25568	34231	19396	10438	17982	20542	20679	29704	22835	23031	9068	20335	8946	22834	29841	11596	27281
HILICPOS	Monoalkylamines	Putrescine	Peak height	1045	C00134	C(CCN)CN	KIDHWZJUCRJVML-UHFFFAOYSA-N	ONLI_0814	1799259	897886	1284481	1510450	1742964	1359865	2049498	1384186	1275649	1170550	1805514	1157841	1150493	1602198	1358589	1166243	1479974	1161871	1114355	1355867	1390317	1150376	1094488	1082638	971423	1070518	1137916	1391081	1393818	1244118	1260878	985350	1332764	1185542	1049816	1207915	1155806	787069	1098778	1294102	1067136
HILICPOS	Retinoids	Retinoic acid	Peak height	444795	C00777	CC1=C(C(CCC1)(C)C)/C=C/C(=C/C=C/C(=C/C(=O)O)/C)/C	SHGAZHPCJJPHSC-YCNIQYBTSA-N	ONLI_0815	12630	13426	0	22859	36050	12351	58989	22471	12523	12637	0	0	29479	15010	15029	18116	14222	12805	13666	12041	31975	15458	21470	16525	11797	0	0	11612	10137	0	23902	19583	14005	0	23910	22852	60214	0	16625	20759	17593
HILICPOS	Nicotinamides	1-Methylnicotinamide	Peak height	457	C02918	C[N+]1=CC=CC(=C1)C(=O)N	LDHMAVIPBRSVRG-UHFFFAOYSA-O	ONLI_0816	5236996	4164530	4278116	2806022	4039868	6191226	3791943	4310252	4896226	9889132	2033498	3357745	3819068	6239172	3840168	7022908	5719503	6212132	3749668	3802804	3951529	9160662	5423701	2922670	7801750	7460722	2122016	1777611	1667309	6915121	11244730	6606862	3283351	3187979	3046825	4592406	8042364	1587489	3500920	4937864	3157345
HILICPOS	Ureas	3-Ureidopropionic acid	Peak height	111	C02642	C(CNC(=O)N)C(=O)O	JSJWCHRYRHKBBW-UHFFFAOYSA-N	ONLI_0818	1225746	1233129	1060676	1026241	717616	804782	1475055	900680	1443772	770192	387319	434151	263899	721330	607150	2322932	492798	812679	354719	1031478	499646	894915	1491086	1598520	1065662	3736131	1202574	378315	549464	593100	1845143	1640922	384459	288848	433236	1790239	981715	1931291	741174	722414	352406
HILICPOS	Gamma amino acids and derivatives	4-Acetamidobutyric acid	Peak height	18189	C02946	CC(=O)NCCCC(=O)O	UZTFMUBKZQVKLK-UHFFFAOYSA-N	ONLI_0819	343142	482644	525938	721506	474606	466531	566646	546632	544946	392582	320181	517690	312543	341037	447889	542771	308687	413864	426917	294656	478378	367371	425566	288904	448894	314965	447376	468307	301692	447320	660629	431390	382339	340990	304431	328482	385107	357209	368656	289483	307272
HILICPOS	Aminobenzoic acids	4-Aminobenzoic acid	Peak height	978	C00568	C1=CC(=CC=C1C(=O)O)N	ALYNCZNDIQEVRV-UHFFFAOYSA-N	ONLI_0820	53163064	114065456	65242268	79561936	81789984	62031292	80037968	65647836	173892432	111571040	47429636	89366992	71510872	60742260	75443160	174275280	67464016	67013048	76352000	65698868	80996784	104864184	95302208	61652640	101207136	58455960	109222816	63272024	84722416	70329104	100705656	90060152	80877320	68083624	28593846	64981456	51655588	72865128	93278032	29287988	96435800
HILICPOS	Gamma amino acids and derivatives	4-Guanidinobutyric acid	Peak height	500	C01035	C(CC(=O)O)CN=C(N)N	TUHVEAJXIMEOSA-UHFFFAOYSA-N	ONLI_0821	2263892	3585428	2584689	3477703	3087584	3391736	4432206	4469234	15799766	6829583	1914473	3972458	4249172	2207124	5441752	14834169	3592426	3853967	4358228	3412054	6865846	3866465	4354836	2283900	4354737	2289328	5030874	4967274	6899965	4413503	10027296	6169856	4986240	5677396	2918388	3832930	3708153	3788649	5436171	2394674	4557320
HILICPOS	5'-deoxy-5'-thionucleosides	5'-Methylthioadenosine	Peak height	439176	C00170	CSC[C@@H]1[C@H]([C@H]([C@@H](O1)N2C=NC3=C(N=CN=C32)N)O)O	WUUGFSXJNOTRMR-IOSLPCCCSA-N	ONLI_0822	1267525	943924	1401855	1780822	1940682	1751435	1173924	1695340	1284463	1215758	1740446	1151588	1127310	995819	1228706	1346252	1341026	1360037	1105624	870495	1654686	1136239	1027126	759070	544826	854979	1225363	1146847	1294064	847032	1408876	545149	953375	1156332	1114275	1106899	592546	645816	789943	944155	1973127
HILICPOS	Purine nucleosides	6-Methyladenosine	Peak height	102175		CNC1=C2C(=NC=N1)N(C=N2)[C@H]3[C@@H]([C@@H]([C@H](O3)CO)O)O	VQAYFKKCNSOZKM-IOSLPCCCSA-N	ONLI_0823	35073	10173	44243	41443	29747	30523	14553	33719	30783	32279	35209	12262	11801	26469	37264	13409	37341	39882	26280	11063	35788	17166	31497	10782	10345	16063	23628	16018	22650	12121	44961	0	16458	31789	31411	31888	11350	8806	10211	25658	10593
HILICPOS	Acyl carnitines	Acetylcarnitine	Peak height	7045767	C02571	CC(=O)O[C@H](CC(=O)[O-])C[N+](C)(C)C	RDHQFKQIGNGIED-MRVPVSSYSA-N	ONLI_0824	662892352	589336640	817974784	727072448	702983680	610080896	719519360	762325248	779764800	618921408	790320256	606216640	507545600	631015104	643929984	723165568	567907712	733260736	572737536	669635904	681649600	639514112	746309184	613265920	728925248	794953728	546722112	626897088	713942400	643442688	723042304	463151520	676554624	539994240	720445696	737716800	865425408	608773568	667845376	785731072	559625984
HILICPOS	6-aminopurines	Adenine	Peak height	190	C00147	C1=NC2=NC=NC(=C2N1)N	GFFGJBXGBJISGV-UHFFFAOYSA-N	ONLI_0825	826428	604604	707135	1018094	931143	769488	889306	1048816	833594	597303	999045	659071	607545	462419	687514	768085	861710	863690	696481	509241	883387	573266	632488	422993	431957	507894	806324	726794	1160235	412984	825565	394607	661741	672026	672184	611457	343079	330592	468712	431564	611381
HILICPOS	Guanidines	Agmatine	Peak height	199	C00179	C(CCN=C(N)N)CN	QYPPJABKJHAVHS-UHFFFAOYSA-N	ONLI_0828	54680	56841	59440	49068	63938	61377	66532	53610	67518	60769	59405	56908	72056	72093	75872	84785	53133	63183	62330	66529	68467	56684	68770	58856	59341	56557	61150	66304	63353	72227	74197	66891	55292	59340	55220	129209	63417	56630	60903	60668	66177
HILICPOS	Dipeptides	Ala-Ala	Peak height	5460362	C00993	C[C@H](C(=O)N[C@H](C)C(=O)O)N	DEFJQIDDEAULHB-QWWZWVQMSA-N	ONLI_0829	26657	27173	36562	29201	30510	19007	40795	23481	35816	21982	14122	29552	23391	12232	12924	48782	13259	20421	34890	13552	14593	27355	34253	18287	25718	63636	23163	32316	15978	27720	34446	25946	9929	24274	7297	13714	10720	36992	38996	8628	18123
HILICPOS	Hybrid peptides	Anserine	Peak height	112072	C01262	CN1C=NC=C1C[C@@H](C(=O)O)NC(=O)CCN	MYYIAHXIVFADCU-QMMMGPOBSA-N	ONLI_0834	501647	665008	326131	308458	693318	653213	704253	387407	263033	248520	551890	451589	475224	391087	294370	244316	557609	622641	507522	437564	585923	237652	301524	289924	268906	284352	554925	585658	584931	235266	320559	211179	463918	440674	557365	289029	296484	323237	483269	245510	506674
HILICPOS	L-alpha-amino acids	Arginine	Peak height	6322	C00062	C(C[C@@H](C(=O)O)N)CN=C(N)N	ODKSFYDXXFIFQN-BYPYZUCNSA-N	ONLI_0835	148040064	190596848	176934544	167585824	179461904	158640032	169391680	201316128	223000848	162468384	129966576	177051344	152022128	147040816	134897680	200499024	174716400	161802976	160497680	179199104	158022352	188436096	199652800	199881984	158563776	180448144	175799104	145770432	152818896	180014608	239047952	209107552	157967520	159525200	69494416	187866608	184937712	211721616	178618000	126222384	173257264
HILICPOS	Asparagine and derivatives	Asparagine	Peak height	6267	C00152	C([C@@H](C(=O)O)N)C(=O)N	DCXYFEDJOCDNAF-REOHCLBHSA-N	ONLI_0836	1120929	2335073	1553621	1500691	1588581	2234746	1432413	1355912	2479770	1249166	1453947	1708101	1473682	1202390	1085704	2108148	1679246	1918891	1410035	1936218	1575596	1249900	1828910	2217360	1306352	2117544	2090426	1453055	1324017	1313097	1941515	1894545	1477364	1403867	1169437	1515876	1367096	2339576	2313665	829488	1530802
HILICPOS	Aspartic acid and derivatives	Aspartic acid	Peak height	5960	C00049	C([C@@H](C(=O)O)N)C(=O)O	CKLJMWTZIZZHCS-REOHCLBHSA-N	ONLI_0837	44000	47916	26384	44627	70175	43335	53375	39248	67363	49618	44522	40203	37771	24050	30617	78240	34569	44023	40065	43080	41228	34402	34679	31847	53354	37558	46680	50292	30688	31625	37464	39509	31531	32055	30003	34753	27208	37082	68564	36905	55959
HILICPOS	Bilirubins	Biliverdin	Peak height	5280353	C00500	CC\1=C(/C(=C/C2=C(C(=C(N2)/C=C\3/C(=C(C(=O)N3)C)C=C)C)CCC(=O)O)/N/C1=C\C4=NC(=O)C(=C4C)C=C)CCC(=O)O	RCNSAJSGRJSBKK-NSQVQWHSSA-N	ONLI_0838	195015	67043	117043	520234	155410	253613	91650	346169	82529	193687	504970	109674	115038	100931	183029	43665	280641	290682	197759	189866	283416	126369	259319	92426	53796	151060	149971	123517	213042	94475	399474	41252	477441	152090	372149	140216	65741	47409	80443	137564	147699
HILICPOS	Biotin and derivatives	Biotin	Peak height	171548	C00120	C1[C@H]2[C@@H]([C@@H](S1)CCCCC(=O)O)NC(=O)N2	YBJHBAHKTGYVGT-ZKWXMUAHSA-N	ONLI_0839	19802	22118	55010	51112	36407	18128	41343	70721	16637	17112	35088	22698	42177	13432	16461	0	24152	31084	30657	29697	32565	21491	17558	44863	7665	92388	0	27857	16893	13540	41497	0	30646	29422	27112	39695	15172	15104	24585	21440	33655
HILICPOS	Carnitines	Carnitine	Peak height	10917	C00318	C[N+](C)(C)C[C@@H](CC(=O)[O-])O	PHIQHXFUZVPYII-ZCFIWIBFSA-N	ONLI_0841	178983232	128872360	183426192	191488160	122744864	160205136	177229328	157091296	189681568	137994240	177812624	123411688	120889216	225054224	173187936	153641952	143647840	137180496	159272368	148037344	168159968	144896784	148044192	127187720	110802256	142989376	134163288	144327168	174399504	166001808	191317584	110113512	179789520	156560448	164024528	157515136	165539520	139191552	140570432	142378896	142865872
HILICPOS	Hybrid peptides	Carnosine	Peak height	439224	C00386	C1=C(NC=N1)C[C@@H](C(=O)O)NC(=O)CCN	CQOVPNPJLQNMDC-ZETCQYMHSA-N	ONLI_0842	5938	0	0	0	0	8453	0	0	0	0	0	0	0	0	0	0	0	0	6439	0	0	0	0	0	0	5438	0	0	0	0	0	0	0	0	0	0	7733	0	0	0	0
HILICPOS	Cholines	Choline	Peak height	305	C00114	C[N+](C)(C)CCO	OEYIOHPDSNJKLS-UHFFFAOYSA-N	ONLI_0843	365630144	333851360	357982112	407958752	445709952	421876416	433211712	405160576	382552320	424728736	397329344	321523168	299356288	362175072	373438304	570060032	260849984	397337536	308990496	330118048	337997472	287918112	315613184	330902784	412783456	299913792	280408352	274107424	318860896	342567808	376924480	246981616	238546208	303069984	221281520	278159296	234922256	241360144	304319136	351030848	316962656
HILICPOS	L-alpha-amino acids	Citrulline	Peak height	9750	C00327	C(C[C@@H](C(=O)O)N)CNC(=O)N	RHGKLRLOHDJJDR-BYPYZUCNSA-N	ONLI_0844	4858868	7385328	6888028	7599765	7118264	6779466	5956320	7966830	11746059	7374546	4673824	6340542	6607856	6719886	6048600	12525525	7256635	6365346	6818028	8007213	7268446	6942544	7669682	8422226	6294414	8793637	7817190	6204590	5854122	7338466	11275560	9070294	5513444	5353262	4261676	7336712	6280241	7179658	6896119	6678233	6312974
HILICPOS	Alpha amino acids and derivatives	Creatine	Peak height	586	C00300	CN(CC(=O)O)C(=N)N	CVSVTCORWBXHQV-UHFFFAOYSA-N	ONLI_0846	310200000	448563456	336807616	351666912	439067008	442164192	431376544	375516256	319501952	306491840	325518368	337914528	324791616	233062176	210951264	426129888	344219296	389942592	333354464	337038784	377657632	308341472	353446464	381636768	246422896	418386016	387320288	309646560	391863872	318306464	410166560	281986528	320834592	347039808	260962224	340430976	277560704	325002624	341587008	303037920	350692384
HILICPOS	L-cysteine-S-conjugates	Cystathionine	Peak height	439258	C02291	C(CSC[C@@H](C(=O)O)N)[C@@H](C(=O)O)N	ILRYLPWNYFXEMH-WHFBIAKZSA-N	ONLI_0847	37041	43328	48382	52755	61087	40455	55029	60431	66298	39753	52240	36991	24852	38096	47937	61791	43187	50938	50858	37330	34403	60492	39333	34962	29438	46250	63348	44674	41177	44416	42614	56487	55559	33049	32900	58972	31390	27349	28044	40058	26692
HILICPOS	Alpha amino acids	DL-2-Methylglutamic acid	Peak height	95440		CC(CCC(=O)O)(C(=O)O)N	QHSCIWIRXWFIGH-UHFFFAOYSA-N	ONLI_0848	452937	462096	377446	484521	482423	392685	404029	345385	419908	362031	486723	383143	340406	315249	271442	541152	364305	549461	366146	668472	461276	315491	362693	455000	367362	372524	341068	407871	373813	418574	447354	401511	367370	359176	426530	376188	344854	325812	411625	339631	332257
HILICPOS	Tropane alkaloids	Ecgonine	Peak height	443003	C10858	CN1C2CCC1[C@H]([C@H](C2)O)C(=O)O	PHMBVCPLDPDESM-RLXKETGRSA-N	ONLI_0849	11384	17013	18034	13403	30507	33610	17145	10709	12005	10405	11617	16494	12717	17026	29672	13846	8538	12944	16490	26098	13315	13771	13873	13009	12698	12580	11337	12109	13845	12377	13263	14917	28233	8452	26014	11933	14343	13423	10139	14345	14477
HILICPOS	Gamma amino acids and derivatives	gamma-Aminobutyric Acid GABA	Peak height	119	C00334	C(CC(=O)O)CN	BTCSSZJGUNDROE-UHFFFAOYSA-N	ONLI_0850	1215312	1458733	1906778	1966195	1843368	1481137	1960381	1965168	2623881	1997410	1157999	1465318	1664702	1714435	1952179	3356006	1400971	1751966	1429900	1571158	1639986	1736924	2066072	2176824	1841346	1415688	2073758	1594047	1625522	1512125	2242148	2209240	1358728	1320213	1093829	1656172	1508580	1403568	1728588	1453449	1560647
HILICPOS	Dipeptides	gamma-Glutamylleucine	Peak height	151023		CC(C)C[C@@H](C(=O)O)NC(=O)CC[C@@H](C(=O)O)N	MYFMARDICOWMQP-YUMQZZPRSA-N	ONLI_0851	553413	950699	681834	751299	789511	544754	582499	574503	1002059	727546	511770	629659	635048	411502	435229	1069760	646108	628339	769564	718958	822891	523057	698654	747956	654367	543232	1080709	682016	764054	542114	788120	747851	502332	587784	445290	490919	471079	530521	761107	442571	852139
HILICPOS	Dipeptides	gamma-Glutamylmethionine	Peak height	7009567		CSCC[C@@H](C(=O)O)NC(=O)CC[C@@H](C(=O)O)N	RQNSKRXMANOPQY-BQBZGAKWSA-N	ONLI_0852	214594	250875	287886	273823	170824	102825	85183	48603	497431	255859	134267	211469	305672	169799	179665	315315	298979	269512	368651	291577	297305	261580	392066	403878	313884	315523	494185	297789	361745	218797	301592	442239	266550	258278	195585	280443	225209	319024	384776	137974	260920
HILICPOS	Dipeptides	Glu-Gln	Peak height	10171586		C(CC(=O)O)[C@@H](C(=O)N[C@@H](CCC(=O)N)C(=O)O)N	MGHKSHCBDXNTHX-WDSKDSINSA-N	ONLI_0853	1007608	897066	1455076	1672825	825425	721386	693750	751857	1583798	883748	934742	862384	801705	894581	787422	1032095	1103853	1054373	1224740	990692	1382782	1340876	1224242	1299631	793100	1105074	1375601	1127522	1319940	887324	1353441	934359	834343	965969	1279925	999011	1026593	1078306	910636	936407	734562
HILICPOS	Glutamic acid and derivatives	Glutamic acid	Peak height	33032	C00025	C(CC(=O)O)[C@@H](C(=O)O)N	WHUUTDBJXJRKMK-VKHMYHEASA-N	ONLI_0854	2227057	2383784	1504306	1893973	3139171	2672613	2259622	1983250	2190726	2016807	2353798	2099049	1652977	939026	1373718	2050980	1624594	2017856	2221656	2164141	2077574	1332751	1742997	1544151	1548183	1133790	2620823	2642574	2424928	1130464	1611552	1238436	1747325	1940446	1477292	1308484	1022404	1587404	2283951	1251392	1909159
HILICPOS	L-alpha-amino acids	Glutamine	Peak height	5961	C00064	C(CC(=O)N)[C@@H](C(=O)O)N	ZDXPYRJPNDTMRX-VKHMYHEASA-N	ONLI_0855	42306292	49100748	65682692	96336456	44512872	50315672	45732900	53567580	58383060	49667352	50042008	47085760	42726840	61260256	45212196	66793512	55338048	57260588	42937080	50097576	54479092	64170352	53420328	61788680	40006104	71256112	56074012	48277056	52947200	61108832	69111304	48777968	44055764	53351408	85188392	57217216	67873120	55095228	42976616	47409056	46094336
HILICPOS	Dipeptides	Glu-Thr	Peak height	6998031		C[C@H]([C@@H](C(=O)O)NC(=O)[C@H](CCC(=O)O)N)O	JSIQVRIXMINMTA-ZDLURKLDSA-N	ONLI_0858	93462	129432	117381	140397	133283	125189	103268	128414	161597	74322	111307	122634	100737	89411	84388	129087	117306	118785	131817	91385	137992	88175	153829	159948	92133	107723	172055	133333	157484	76817	122512	117514	103967	99926	95960	134681	85360	98886	148794	59478	92674
HILICPOS	Dipeptides	Gly-val	Peak height	97417		CC(C)C(C(=O)O)NC(=O)CN	STKYPAFSDFAEPH-UHFFFAOYSA-N	ONLI_0859	8734	15742	11482	13832	9910	9498	11902	11590	9747	12152	9298	12922	13499	8680	8567	16125	14285	11306	10396	13690	11569	7820	12205	14338	10873	11625	14904	13862	10801	13840	11435	15525	9342	10884	10136	0	11417	10300	10546	6167	12784
HILICPOS	Purine nucleosides	Guanosine	Peak height	135398635	C00387	C1=NC2=C(N1[C@H]3[C@@H]([C@@H]([C@H](O3)CO)O)O)N=C(NC2=O)N	NYHBQMYGNKIUIF-UUOKFMHZSA-N	ONLI_0860	140894	308011	0	191079	707932	68154	674062	0	322741	0	459607	128417	31632	0	0	0	79525	0	55732	47305	94049	0	35031	12809	188702	0	32742	161139	18381	20009	53149	0	52680	54730	84872	194498	24238	22186	54505	0	440396
HILICPOS	2-arylethylamines	Histamine	Peak height	774	C00388	C1=C(NC=N1)CCN	NTYJJOPFIAHURM-UHFFFAOYSA-N	ONLI_0861	2154185	3063642	4482825	5985418	10203498	10059253	5945416	12257488	6255706	11505929	4589602	3890218	3890372	2039578	2291347	8359837	2024922	1101086	2690976	4592020	4509361	2312883	5542060	1496242	3321756	5181556	2131510	2781967	3042443	4233864	4731137	2180019	1837837	2610074	2921867	5542505	2332346	3336934	5121846	4613786	2592294
HILICPOS	Histidine and derivatives	Histidine	Peak height	6274	C00135	C1=C(NC=N1)C[C@@H](C(=O)O)N	HNDVDQJCIGZPNO-YFKPBYRVSA-N	ONLI_0862	8886110	10264892	8432503	10404233	9493170	11317178	9939901	9435611	14845259	10553530	7647954	11054883	9983423	8164176	8568313	12700416	11170005	11612537	10102769	10627399	10822476	9147845	10353304	9219534	8497832	8454416	12691262	8857929	9600509	10477955	14080351	10984525	9524371	10284630	9447163	10218041	9143969	10397869	11678608	7102670	11046279
HILICPOS	L-alpha-amino acids	Homoarginine	Peak height	9085	C01924	C(CCN=C(N)N)C[C@@H](C(=O)O)N	QUOGESRFPZDMMT-YFKPBYRVSA-N	ONLI_0863	727113	961396	1233858	1446129	870159	670792	885309	1349514	1809268	1459346	598652	791612	717141	1531037	1355490	2060652	899710	618492	777115	834092	606678	1587218	1563236	2561443	1518142	1618726	565586	805273	443845	1337033	1610178	2094441	612761	651266	399201	2333443	2015880	1345303	809140	791584	1137145
HILICPOS	Hypoxanthines	Hypoxanthine	Peak height	135398638	C00262	C1=NC2=C(N1)C(=O)NC=N2	FDGQSTZJBFJUBT-UHFFFAOYSA-N	ONLI_0864	317073	286207	82768	349550	3358284	35483	3223335	88742	1327434	27065	2038232	71505	95305	69379	83030	42030	60495	127250	92863	28961	75095	48651	207997	63267	790936	43698	67012	94798	87564	60293	78750	46228	83773	55932	61860	174849	55549	39007	104047	52828	207045
HILICPOS	Alkyl-phenylketones	Kynurenine	Peak height	161166	C00328	C1=CC=C(C(=C1)C(=O)C[C@@H](C(=O)O)N)N	YGPSJZOEDVAXAB-QMMMGPOBSA-N	ONLI_0866	127643	106069	260872	242307	127801	178709	116550	317558	235771	231711	117643	130104	141558	189358	236726	343420	122088	161660	110161	97704	158314	215818	259141	304053	164468	175335	177816	98022	104525	202171	327188	207696	114849	100801	150126	192275	261229	234560	120506	229956	112882
HILICPOS	Leucine and derivatives	Leucine	Peak height	6106	C00123	CC(C)C[C@@H](C(=O)O)N	ROHFNLRQFUQHCH-YFKPBYRVSA-N	ONLI_0867	108452632	157154704	129335784	120558856	111521784	126185576	103258448	119128968	172340112	175150544	94395408	135047936	138609920	90316072	114387312	209755680	152796256	128048624	128171920	129876808	149804432	123209064	153333152	146056112	141073696	133102488	165692992	106264800	121901872	138821968	188826768	211273872	113606432	125041800	77385192	123331688	114965192	149113376	192602112	112552048	180584864
HILICPOS	Arginine and derivatives	N,N-Dimethylarginine	Peak height	123831	C03626	CN(C)C(=NCCC[C@@H](C(=O)O)N)N	YDGMGEXADBMOMJ-LURJTMIESA-N	ONLI_0871	8384401	11079646	10664848	11911409	12419807	9635347	12679621	11783833	12301765	8854148	8055864	10939033	9577709	12646094	9057054	13666528	8657616	9902943	9134193	9788857	7573142	10891993	10510924	13536334	8537150	13205426	9925701	8024958	6366220	12438213	13711056	11123461	8543857	7736567	7037786	13303199	12689346	11232257	9584902	9702981	9877331
HILICPOS	Carboximidic acids	N8-Acetylspermidine	Peak height	123689	C01029	CC(=O)NCCCCNCCCN	FONIWJIDLJEJTL-UHFFFAOYSA-N	ONLI_0872	2637160	1645521	2796176	3322220	1973809	1411411	2144986	2209658	1294220	1826299	1721668	1294524	1420438	3014073	2282519	1816090	1524955	2222157	1644449	1614268	1782958	2462148	2059173	2551297	1374370	2190109	1778440	1347150	2241669	2111983	2418375	1762760	1514013	1592197	1497982	2032561	2207310	1322868	1508075	2923422	1205027
HILICPOS	N-acyl-L-alpha-amino acids	N-Acetylalanine	Peak height	88064		C[C@@H](C(=O)O)NC(=O)C	KTHDTJVBEPMMGL-VKHMYHEASA-N	ONLI_0873	56267	87788	66206	68194	63648	56860	51029	63204	79624	68058	57907	49696	59457	58242	76929	83067	46110	80880	56654	61431	63929	56655	84678	55118	54727	66400	69013	59498	50780	94822	78697	71175	43861	49835	54387	69542	51051	57296	61690	55266	54354
HILICPOS	Methionine and derivatives	N-Acetylmethionine	Peak height	6180	C02712	CC(=O)NC(CCSC)C(=O)O	XUYPXLNMDZIRQH-UHFFFAOYSA-N	ONLI_0875	170022	389202	146674	198092	256027	200610	262354	192857	393883	308164	163511	230547	262842	174397	223339	465264	227232	293205	202789	284236	314100	202761	235583	195941	279697	179189	329340	223318	213559	242745	388221	351184	206672	189018	141011	246796	213022	205449	229767	148576	252622
HILICPOS	N-acyl-L-alpha-amino acids	N-Acetyltryptophan	Peak height	700653		CC(=O)N[C@@H](CC1=CNC2=CC=CC=C21)C(=O)O	DZTHIGRZJZPRDV-LBPRGKRZSA-N	ONLI_0876	775715	1121318	1174742	1884101	1326533	1398638	1120105	1534598	1241670	1432887	1336326	1055506	1346391	1227074	1326622	2577172	1010902	1557933	1033023	1170368	1810073	1199154	1316622	1296655	1837240	1281946	1271904	934324	1057142	1658667	1892719	1635501	1051359	978988	1542210	1526221	1100775	1066316	1306424	1689088	1196177
HILICPOS	Nicotinamides	Nicotinamide	Peak height	936	C00153	C1=CC(=CN=C1)C(=O)N	DFPAKSUCGFBDDF-UHFFFAOYSA-N	ONLI_0877	67604624	60004096	45460796	30608064	58696784	79126880	55120912	49321724	48403288	79645864	35086352	43695412	35024336	31997794	32469000	53825756	59703976	64103348	54924532	67401968	33822044	73071440	58445772	32784574	72084528	58517508	27716746	21030026	20164436	37708184	70985176	56258920	50956316	26135534	29385614	28164986	58640008	21124800	47080436	31444860	38935772
HILICPOS	Histidine and derivatives	N-Methylhistidine	Peak height	90638	C03298	CN[C@@H](CC1=CN=CN1)C(=O)O	CYZKJBZEIFWZSR-LURJTMIESA-N	ONLI_0878	1588129	2125331	2045395	2022466	2106546	3305786	2281529	1977451	1458352	1541632	2315144	1817965	1992011	1942862	1401294	1806939	1987915	2199774	2117262	1051620	2291379	1505385	2135756	2062217	1264183	2009958	2145259	2228368	1780699	1709674	1951722	1303170	1650699	1881324	2263984	1696050	1814118	1994817	1906728	1363013	2094792
HILICPOS	L-alpha-amino acids	N-Methyllysine	Peak height	164795	C02728	CNCCCC[C@@H](C(=O)O)N	PQNASZJZHFPQLE-LURJTMIESA-N	ONLI_0879	8072946	13500490	10319820	16346725	10131377	6250888	13198724	15773468	18894072	16860410	6892361	8821658	9184799	17129034	16024804	24984256	8163666	10859826	8692629	10980788	6782286	15201924	16174912	20517692	16063090	19100704	12039558	10055569	8015950	14412985	22212650	26949760	8377210	8952599	4031684	16765629	15703410	17073814	10602863	12224051	14639381
HILICPOS	Proline and derivatives	N-Methylproline	Peak height	643474		CN1CCC[C@H]1C(=O)O	CWLQUGTUXBXTLF-YFKPBYRVSA-N	ONLI_0880	2325730	3769864	1759048	2577463	5263333	5876439	4765238	3397426	2517860	2520122	4085339	3679575	5240559	3575452	1748216	4466470	3851856	3991539	3230684	2679206	3558583	3682918	2201967	2656003	2211015	3057889	3344601	3802067	2400974	3888893	3326867	2993782	3189251	4027696	2335238	3130707	2748583	3107292	3434715	2585676	4921515
HILICPOS	Secondary alcohols	Pantothenic acid	Peak height	6613	C00864	CC(C)(CO)[C@H](C(=O)NCCC(=O)O)O	GHOKWGTUZJEAQD-ZETCQYMHSA-N	ONLI_0882	4342970	5764676	6772424	9564143	5593860	6482463	6219950	12362905	9925198	9191245	5260080	7106275	6419560	9954393	8880441	13537531	4879844	6005130	6762886	6689226	6984434	10468772	8115974	10547680	12595476	15503397	6065215	5404361	4266811	11593651	12492465	10140975	4781010	4890344	4309950	9940157	10823980	13069016	5902384	8724949	6031350
HILICPOS	Alpha amino acids	Pipecolic acid	Peak height	849	C00137	C1CCNC(C1)C(=O)O	HXEACLLIILLPRG-UHFFFAOYSA-N	ONLI_0884	1731737	603560	373261	408533	526720	496317	620634	424716	472300	488781	599449	487652	564312	469483	351206	500236	459374	594681	594216	1582000	3730532	449491	401021	291002	365797	411382	569754	511533	654475	1637792	529698	490955	512606	514494	348935	611230	372487	361469	526801	314781	1265498
HILICPOS	Proline and derivatives	Proline	Peak height	145742	C00148	C1C[C@H](NC1)C(=O)O	ONIBWKKTOPOVIA-BYPYZUCNSA-N	ONLI_0885	8580027	22382730	11797521	13914471	12615558	16214390	10172656	11295202	29794414	15048394	9367749	17069370	15431744	8413555	11728467	25727884	17968118	13169418	13552720	16341326	15878683	12754415	16670717	14794646	13736173	12447109	21353578	13472191	15472647	12210861	24329288	23525204	16385024	14424827	8012800	12965419	10263823	19689326	25450946	6479078	18668340
HILICPOS	Dipeptides	Proline-hydroxyproline	Peak height	11902892		C1C[C@H]([NH2+]C1)C(=O)N2C[C@@H](C[C@H]2C(=O)[O-])O	ONPXCLZMBSJLSP-CSMHCCOUSA-N	ONLI_0886	200214	275362	400112	644024	300067	220642	417805	244658	222153	186617	423186	178047	148240	423598	206352	225307	305446	357728	147991	216417	214882	157645	209652	266254	148422	443122	314089	215279	295582	281300	334165	171932	195230	159195	489421	486534	331189	204836	174214	153072	72042
HILICPOS	Acyl carnitines	Propionylcarnitine	Peak height	107738	C03017	CCC(=O)OC(CC(=O)[O-])C[N+](C)(C)C	UFAHZIUFPNSHSL-UHFFFAOYSA-N	ONLI_0887	18270324	11802648	12168656	17258540	10180818	9665213	15994686	16551489	19790412	13436589	13430782	10096145	9072541	12375315	13742889	22126080	10670943	15906024	12900117	18496480	13379118	11604844	12632918	11720396	12032632	12929822	16115835	11966213	13541220	14444803	17337800	13639445	12743515	9092092	12700763	25617690	11324410	12917552	15895599	10360659	10528012
HILICPOS	Pyridoxamine 5'-phosphates	Pyridoxamine	Peak height	1052	C00534	CC1=NC=C(C(=C1O)CN)CO	NHZMQXZHNVQTQA-UHFFFAOYSA-N	ONLI_0888	11537	25942	16332	15849	16021	26559	16734	51014	34833	38331	28791	15767	30938	16965	16341	53816	15556	31446	26595	17166	27229	16740	26019	33941	35579	29139	27899	13560	15939	32657	33652	32272	25574	29120	25543	34297	35442	27350	15391	25945	34596
HILICPOS	5'-deoxy-5'-thionucleosides	S-Adenosyl-homocysteine	Peak height	439155	C00021	C1=NC(=C2C(=N1)N(C=N2)[C@H]3[C@@H]([C@@H]([C@H](O3)CSCC[C@@H](C(=O)O)N)O)O)N	ZJUKTBDSGOFHSH-WFMPWKQPSA-N	ONLI_0889	8376	35578	14091	36549	69217	70985	39897	42944	41032	9538	32555	29743	8365	0	25775	64076	11066	14392	12634	15121	11201	0	9478	17251	0	0	11387	10417	0	11653	9170	28859	26885	12835	10865	35368	10571	13837	0	12525	12369
HILICPOS	Serine and derivatives	Serine	Peak height	5951	C00065	C([C@@H](C(=O)O)N)O	MTCFGRXMJLQNBG-REOHCLBHSA-N	ONLI_0891	2540002	3736278	3490848	3637897	3338488	3837158	2813664	2995433	5099604	3027511	3106848	3315637	3024190	2918741	2797563	4062464	3544990	3857535	2850826	3187622	3183602	3058993	3650451	4066462	2586101	3717534	3675788	3061015	2999940	2886036	4040802	3696446	2823829	2688569	2486256	3349107	2777849	4242747	3924797	2097600	3332763
HILICPOS	Arginine and derivatives	Targinine	Peak height	132862	C03884	CN=C(N)NCCC[C@@H](C(=O)O)N	NTNWOCRCBQPEKQ-YFKPBYRVSA-N	ONLI_0892	821430	1094320	973669	1269748	1092092	727782	1089778	1015401	1711212	999708	697847	1040146	946634	1021201	770691	1517938	1169270	1042611	924608	1179968	736666	1318725	1312705	1285040	1091676	1222020	1014387	763917	647414	1221658	1835466	1853146	976162	845135	602281	1610848	1296797	1475735	1089218	837995	1251935
HILICPOS	Organosulfonic acids	Taurine	Peak height	1123	C00245	C(CS(=O)(=O)O)N	XOAAWQZATWQOTB-UHFFFAOYSA-N	ONLI_0893	2801767	3760505	2159858	2637259	4202036	3766700	4195226	3413532	3488758	3475044	3542434	3506548	2216709	1866482	2979746	6270793	2473710	3691148	2873115	2538408	2956618	2120495	2104578	2470418	1852716	2529458	2576557	2454968	2568246	2524801	3298031	1430717	2160424	2601788	2261356	2070758	1490252	1659111	2775612	1896890	2774244
HILICPOS	Trialkyl amine oxides	TMAO	Peak height	1145	C01104	C[N+](C)(C)[O-]	UYPYRKYUKCHHIB-UHFFFAOYSA-N	ONLI_0896	7795386	10607606	25573094	30626682	17615176	10935926	9988182	35007392	47078060	75541368	7250263	8373926	6210088	24825604	31782964	56439936	7281353	13586767	7887542	7169722	9154973	30030858	30772686	25781506	28761978	31756602	16132477	4387350	8398425	25965364	95756352	47998692	3067554	12884208	8186964	72037768	31527564	47528848	6731994	16322492	3977415
HILICPOS	Indolyl carboxylic acids and derivatives	Tryptophan	Peak height	6305	C00078	C1=CC=C2C(=C1)C(=CN2)C[C@@H](C(=O)O)N	QIVBCDIJIAJPQS-VIFPVBQESA-N	ONLI_0897	43730848	54296380	82492568	99648392	54094016	75364904	46084268	104160152	84523768	92528296	58151328	55218624	87309136	84204216	66628660	109660112	67476728	57087148	60886068	61825312	79948952	89227456	137650272	112126136	95225200	122904096	72414312	54658876	58874460	97220584	142677280	135769344	51747748	56692340	67364600	108790416	87749240	129709504	79416176	87121776	63617504
HILICPOS	Valine and derivatives	Valine	Peak height	6287	C00183	CC(C)[C@@H](C(=O)O)N	KZSNJWFQEVHDMF-BYPYZUCNSA-N	ONLI_0899	1791380608	1970536192	1892692480	1949891328	1834056576	1814052736	1497477120	1739138560	2499503616	2164530432	1406420992	1915368704	1767766144	1672572672	1793030528	2759088128	1491131136	1746091904	1882707840	1599247872	1869103872	2139627776	1789357312	1925877760	2035661952	1395935744	1864909696	1707561216	1776144128	1741452416	1897668992	1596541952	1419109376	1446473344	1025095424	1292269696	1456116864	1357333376	1910954112	1477437696	1873281280
HILICNEG	Medium-chain hydroxy acids and derivatives	10-Hydroxydecanoic acid	Peak height	74300	C02774	C(CCCCC(=O)O)CCCCO	YJCJVMMDTBEITC-UHFFFAOYSA-N	ONLI_0908	2.09242e+06	371216	1.39959e+06	1.44806e+06	1.28362e+06	818925	1.58065e+06	2.23241e+06	749890	1.10598e+06	2.13686e+06	1.37259e+06	1.20902e+06	789202	1.3147e+06	1.30437e+06	1.4095e+06	2.64418e+06	1.06551e+06	2.55219e+06	74767.3	770688	3.10243e+06	1.07095e+06	3.79756e+06	4.10449e+06	1.38498e+06	1.71058e+06	971411	1.27249e+06	1.0936e+06	849035	2.00277e+06	862659		2.31901e+06	2.04352e+06	1.34589e+06	900820	2.02677e+06	788936
HILICNEG	Salicylic acids	2,6-Dihydroxybenzoic acid	Peak height	9338	C21298	C1=CC(=C(C(=C1)O)C(=O)O)O	AKEUNCKRJATALU-UHFFFAOYSA-N	ONLI_0914	1.35262e+08	6.8655e+07	9.24747e+07	8.19006e+07	1.5198e+08	1.14811e+08	1.47143e+08	1.51904e+08	2.23054e+08	1.22226e+08	1.1067e+08	1.39898e+08	1.54161e+08	7.17501e+07	2.2754e+08	1.67261e+08	2.00573e+08	1.09188e+08	2.89054e+07	135682592	9.5344e+06	8.17519e+07	1.6999e+08	1.62511e+08	1.54841e+08	1.13143e+08	1.50418e+08	1.2998e+08	9.8004e+07	1.32597e+08	1.27719e+08	1.51377e+08	1.42105e+08	8.97757e+07		1.08205e+08	9.52469e+07	1.09921e+08	1.41942e+08	7.75125e+07	7.06241e+06
HILICNEG	Pyrimidine 2'-deoxyribonucleosides	2-Deoxyuridine	Peak height	13712	C00526	C1[C@@H]([C@H](O[C@H]1N2C=CC(=O)NC2=O)CO)O	MXHRCPNRJAMMIM-SHYZEUOFSA-N	ONLI_0916	891984	240454	530914	611637	1.58219e+06	676513	888043	812046	806452	2.05173e+06	723949	666351	509017	533769	1.07391e+06	837723	951644	1.10097e+06	418497	803367	135776	454183	1.34559e+06	653570	671521	1.44443e+06	911549	572804	1.10814e+06	544476	717208	1.00546e+06	684265	290995		676032	826035	698127	488374	786824	15283.6
HILICNEG	Hydroxy fatty acids	2-Hydroxy-3-methylbutyric acid	Peak height	99823		CC(C)C(C(=O)O)O	NGEWQZIDQIYUNV-UHFFFAOYSA-N	ONLI_0917	5.90431e+06	2.34282e+06	5.12754e+06	4.90614e+06	4.6959e+06	4.13591e+06	3.94019e+06	6.3352e+06	6.33258e+06	5.34879e+06	4.33283e+06	4.62101e+06	3.61974e+06	2.90551e+06	5307638	5.78304e+06	4.22314e+06	7.02486e+06	3.63132e+06	4.11151e+06	307768	1.58111e+06	5.06228e+06	5.87926e+06	5.06191e+06	8.73091e+06	5307638	3.87029e+06	2.54067e+06	5.74614e+06	4.42595e+06	7.02401e+06	4.29879e+06	2.93604e+06		4.97257e+06	4.67265e+06	5307638	4.77013e+06	4.66965e+06	1.72118e+07
HILICNEG	Hydroxy fatty acids	2-Hydroxy-4-methylpentanoic acid	Peak height	92779		CC(C)CC(C(=O)O)O	LVRFTAZAXQPQHI-UHFFFAOYSA-N	ONLI_0918	6.50698e+06	1.90851e+06	1.09015e+06	1.07911e+06	1.34145e+06	4.14052e+06	4.86804e+06	1.60968e+06	2.00723e+06	4.00614e+06	6.24407e+06	4.16887e+06	3.30025e+06	467747	4.51325e+06	1.02024e+06	5.70078e+06	2.59542e+06	1.4556e+06	4.45702e+06	266124	619996	2.42339e+06	3.79726e+06	1.55214e+06	1.25486e+06	4.42508e+06	5.24083e+06	3.49263e+06	1.3932e+06	1.23145e+06	1.81755e+06	3.92596e+06	3.16342e+06		1.3447e+06	1.06726e+06	1.23674e+06	5.58889e+06	1.62364e+06	1.39557e+06
HILICNEG	Alpha hydroxy acids and derivatives	2-Hydroxyisobutyric acid	Peak height	11671	C21297	CC(C)(C(=O)O)O	BWLBGMIXKSTLSX-UHFFFAOYSA-N	ONLI_0919	9.94357e+06	3.84317e+06	4.3052e+06	6.35409e+06	5.86367e+06	8.62473e+06	8.4127e+06	6.13292e+06	7.0825e+06	8.73913e+06	6.55637e+06	7.64743e+06	7217326	2.77051e+06	7.25613e+06	9.46717e+06	9.91584e+06	8.0732e+06	2.97008e+06	8.8715e+06	375993	1.93069e+06	1.0505e+07	7.90803e+06	8.68139e+06	7.10299e+06	9.90198e+06	7.18355e+06	5.22317e+06	4.04868e+06	5.42753e+06	1.05854e+07	9.52959e+06	5.70717e+06		5.38409e+06	7.55927e+06	4.33018e+06	7.68306e+06	6.16328e+06	1.94427e+07
HILICNEG	Hydroquinolones	2-Hydroxyquinoline	Peak height	6038	C06338	C1=CC=C2C(=C1)C=CC(=O)N2	LISFMEBWQUVKPJ-UHFFFAOYSA-N	ONLI_0920	8.48395e+06	2.68729e+06	1.76198e+07	1.62825e+07	3.39578e+07	1.02454e+07	5.43518e+06	1.1666e+07	4.86144e+07	8.2353e+06	8.0598e+06	6.07202e+06	1.30497e+07	2.06919e+07	2.69023e+07	2.16383e+07	8.43535e+06	1.96344e+07	5.0284e+06	8.25838e+06	655634	1.11444e+07	1.39865e+07	3.10556e+07	1.3341e+07	5.33672e+07	1.56647e+07	1.22802e+07	1.58018e+07	3.27955e+07	1.4854e+07	3.72572e+07	5.45028e+06	900231		1.43087e+07	7.14753e+06	1.68322e+07	6.8108e+06	2.20081e+07	1.67802e+06
HILICNEG	P-methoxybenzoic acids and derivatives	3-Hydroxy-4-methoxybenzoic acid	Peak height	12575		COC1=C(C=C(C=C1)C(=O)O)O	LBKFGYZQBSGRHY-UHFFFAOYSA-N	ONLI_0923	32277.3	14473.2	25244.7	15568	57810.8	13830.7	18149.3	54604.1	95201	83749.6	9241.05	29825.4	28110.6	12566.6	38239.9	84774.8	37110.1	25326.9	23003.2	18722.2	10042.6	9323.63	32027.8	58446.3	43343.4	20268.6	53379	18954.4	39538.3	38118	44706.5	60725.7	18922.8	17420		20182.5	18258.4	44385.9	33355.6	18935.4	9734.98
HILICNEG	Medium-chain hydroxy acids and derivatives	3-Hydroxyoctanoic acid	Peak height	26613	C20793	CCCCCC(CC(=O)O)O	NDPLAKGOSZHTPH-UHFFFAOYSA-N	ONLI_0924	2.3418e+06	623887	2.48925e+06	2.73104e+06	2.73553e+06	1.31127e+06	2.1704e+06	3.17918e+06	1.49875e+06	1.60442e+06	2.64038e+06	2.21313e+06	1.63545e+06	1.22307e+06	1.80472e+06	1957697	2.07545e+06	4.55456e+06	1.27555e+06	2.8256e+06	101354	1.14345e+06	4.84121e+06	1.61235e+06	5.32152e+06	5.79438e+06	1.58536e+06	1.7683e+06	1.1082e+06	1957697	2.06673e+06	1.55376e+06	2.00603e+06	888741		3.253e+06	2.41754e+06	2.05956e+06	961145	2.32933e+06	1.06643e+06
HILICNEG	Histidine and derivatives	3-Methylhistidine	Peak height	64969	C01152	CN1C=NC=C1C[C@@H](C(=O)O)N	JDHILDINMRGULE-LURJTMIESA-N	ONLI_0928	171982	134253	298364	266796	148250	224258	168465	175519	123350	145194	214796	158165	216615	161565	156292	177863	352774	315975	91984.2	84489.7	11942.4	78623.4	439418	163487	115966	245392	153117	200498	127724	148493	116555	181846	214497	133705		106669	161326	179548	167912	124363	1.29194e+06
HILICNEG	Phenylpropanoic acids	3-Phenyllactic acid	Peak height	3848	C01479	C1=CC=C(C=C1)CC(C(=O)O)O	VOXXWSYKYCBWHO-UHFFFAOYSA-N	ONLI_0929	480384	247404	243585	221605	621513	398050	429677	465442	793050	541082	326465	803560	448261	242445	1.01669e+06	719986	750154	584771	281263	773120	30325.1	230437	579201	818479	494634	360102	723007	528472	355573	407324	328343	730615	427938	271187		240677	277762	514652	671486	399672	518504
HILICNEG	Medium-chain fatty acids	4-Acetylbutyric acid	Peak height	18407	C02129	CC(=O)CCCC(=O)O	MGTZCLMLSSAXLD-UHFFFAOYSA-N	ONLI_0931	8.48798e+06	3.12379e+06	6.24148e+06	9673090	1.02174e+07	5.51598e+06	9.57674e+06	1.04613e+07	1.33342e+07	7.53743e+06	8.63984e+06	1.04209e+07	1.11827e+07	7.84236e+06	1.4141e+07	6.79335e+06	1.40514e+07	1.10709e+07	6.32262e+06	8.44066e+06	397908	3.54496e+06	1.8788e+07	1.01638e+07	9.5882e+06	1.60639e+07	3.03021e+07	6.4727e+06	1.52723e+07	1.32679e+07	7.95309e+06	6.44981e+06	3.23483e+07	5.30275e+06		8.36927e+06	1.25645e+07	7.09093e+06	7.19861e+06	9.60835e+06	1.73189e+07
HILICNEG	Hydroxybenzoic acid derivatives	4-Hydroxybenzoic acid	Peak height	135	C00156	C1=CC(=CC=C1C(=O)O)O	FJKROLUGYXJWQN-UHFFFAOYSA-N	ONLI_0932	447086	255260	381847	258793	1.48644e+06	521162	402792	725422	2.0956e+06	870455	293353	503829	448677	278244	1.63994e+06	1.36177e+06	656706	477535	361155	415489	167084	456726	693361	1.07777e+06	963527	454956	536139	366102	477478	563044	896875	1.167e+06	325169	274562		400595	393998	482142	472875	394119	417539
HILICNEG	Catechols	4-Methylcatechol	Peak height	9958	C06730	CC1=CC(=C(C=C1)O)O	ZBCATMYQYDCTIZ-UHFFFAOYSA-N	ONLI_0934	114870	69337.5	72366.8	128173	86623.7	129689	66248.5	40603.8	55809.9	96451.9	49152.4	62331.3	136568	58119.5	52199.2	234448	161645	32549.1	49811	90758	6962.3	71413.9	56537.7	91545.2	43703	80253.9	61522.4	85646.3	50970.9	57513	83569.8	52765.5	48654.3	62297.5		84573.2	61961.6	70747.8	82146.5	66012.2	295462
HILICNEG	Pyridinecarboxylic acids	4-Pyridoxic acid	Peak height	6723	C00847	CC1=NC=C(C(=C1O)C(=O)O)CO	HXACOUQIXZGNBF-UHFFFAOYSA-N	ONLI_0935	635518	211986	549945	406166	978641	368288	587740	921231	826535	866710	545611	510093	479840	662851	1.65645e+06	1.43215e+06	555796	757447	522914	353951	41142.6	295566	790772	1.12323e+06	823410	645921	877178	405650	455266	1.32309e+06	659836	929959	630158	301893		663332	617618	496601	516788	663804	2.63886e+06
HILICNEG	Hydroxyeicosatetraenoic acids	5,8,11,14-Eicosatetraenoic acid, 16-hydroxy-, 5Z,8Z,11Z,14Z,16R-	Peak height	9548884	C14778	CCCC[C@H](/C=C\C/C=C\C/C=C\C/C=C\CCCC(=O)O)O	JEKNPVYFNMZRJG-STHMYGMFSA-N	ONLI_0936	3.9979e+06	1.2257e+06	2.04498e+06	1.88319e+06	2.37133e+06	3.02575e+06	3.02084e+06	3.61194e+06	4.23304e+06	1.44488e+06	2.03533e+06	2.34263e+06	2.80361e+06	1.86206e+06	2.30125e+06	2959351	4.24342e+06	2.43467e+06	5.76485e+06	2.09903e+06	159624	1.69141e+06	2.95167e+06	3.11582e+06	6.08708e+06	6.0096e+06	2.66857e+06	3.36791e+06	2.8055e+06	4.7945e+06	2.4647e+06	2.97881e+06	4.72302e+06	2.21082e+06		2.28832e+06	2.96013e+06	2.24966e+06	1.72959e+06	3.98439e+06	1.85406e+06
HILICNEG	Medium-chain hydroxy acids and derivatives	6-Hydroxycaproic acid	Peak height	14490	C06103	C(CCC(=O)O)CCO	IWHLYPDWHHPVAA-UHFFFAOYSA-N	ONLI_0938	1.95656e+06	739939	4.60676e+06	4.41717e+06	3.1066e+06	1.4164e+06	2.28248e+06	4.26882e+06	2.05592e+06	1.50322e+06	2.12459e+06	2.14595e+06	1.43766e+06	1.19782e+06	2.05592e+06	2.27319e+06	1.77544e+06	5.6605e+06	1.57518e+06	2.96209e+06	89208.7	1.51844e+06	6.23672e+06	2.66754e+06	6.51458e+06	8.40488e+06	1.71648e+06	1.87546e+06	1.17564e+06	2.45134e+06	3.38133e+06	2.25467e+06	1.57969e+06	852360		5.08769e+06	3.72057e+06	2.57843e+06	1.48028e+06	3.36543e+06	2.02461e+06
HILICNEG	Imidazoles	Allantoin	Peak height	204	C01551	C1(C(=O)NC(=O)N1)NC(=O)N	POJWUDADGALRAB-UHFFFAOYSA-N	ONLI_0943	4.15703e+07	1.94031e+07	3.69963e+07	3.49142e+07	3.52949e+07	3.7073e+07	5.01665e+07	4.37259e+07	3.93891e+07	4.96528e+07	4.34213e+07	3.51635e+07	3.21323e+07	3.53967e+07	5.03564e+07	5.71727e+07	4.58704e+07	5.37301e+07	3.08002e+07	3.31961e+07	2.90259e+06	1.70721e+07	6.13368e+07	4.42408e+07	3.26622e+07	7.26003e+07	4.57986e+07	3.3452e+07	3.29789e+07	42912612	3.64036e+07	5.21753e+07	3.84511e+07	2.36215e+07		3.17776e+07	3.7513e+07	4.02741e+07	3.19196e+07	3.39642e+07	5.58027e+06
HILICNEG	Medium-chain fatty acids	Azelaic acid	Peak height	2266	C08261	C(CCCC(=O)O)CCCC(=O)O	BDJRBEYXGGNYIS-UHFFFAOYSA-N	ONLI_0949	5.3881e+08	690999552	9.9456e+08	9.03549e+08	7.13369e+08	4.49861e+08	8.50552e+08	1.05851e+09	5.66277e+08	3.88806e+08	9.35554e+08	6.31996e+08	7.51714e+08	7.16729e+08	1.2301e+09	8.36408e+08	8.78426e+08	1.20746e+09	4.29716e+08	6.07752e+08	6.15014e+07	4.86399e+08	1.72541e+09	6.08421e+08	6.24934e+08	7.58979e+08	7.09462e+08	5.90707e+08	5.8512e+08	5.91437e+08	5.10565e+08	6.74104e+08	8.11587e+08	4.2236e+08		5.10086e+08	5.61547e+08	5.68975e+08	4.30876e+08	6.0245e+08	1.45356e+07
HILICNEG	Methyl-branched fatty acids	Citraconic acid	Peak height	643798	C02226	C/C(=C/C(=O)O)/C(=O)O	HNEGQIOMVPPMNR-IHWYPQMZSA-N	ONLI_0954	213739	546609	452528	625078	510576	214084	282238	357674	315437	325193	543493	448486	330990	497544	315924	407416	501376	483616	247378	329673	105183	799538	1.45714e+06	176764	199911	294675	319817	286501	409822	239391	266656	213642	471793	234947		233137	260778	431998	301662	205425	209174
HILICNEG	O-glucuronides	Ethyl-beta-glucuronide	Peak height	18392195		CCO[C@H]1[C@@H]([C@H]([C@@H]([C@H](O1)C(=O)O)O)O)O	IWJBVMJWSPZNJH-UQGZVRACSA-N	ONLI_0965	587175	206259	575815	347975	309240	504502	406724	291587	396041	409830	432145	447969	359321	328221	452079	440502	661716	467151	224256	380004	29724.6	226176	408155	522771	310686	560412	430286	502646	275806	532378	287655	292169	453182	262879		274755	326839	378664	513491	456851	321404
HILICNEG	Hydroxycinnamic acids	Ferulic acid	Peak height	445858	C01494	COC1=C(C=CC(=C1)/C=C/C(=O)O)O	KSEBMYQBYZTDHS-HWKANZROSA-N	ONLI_0966	200933	189355	361879	242686	479429	267474	304465	443098	1.36812e+06	313109	89447.3	576851	583929	67205.4	261116	1.07379e+06	525552	385392	432849	352036	28603.9	330244	545552	311557	385882	400750	579736	236143	246213	327251	597996	1.30683e+06	375088	192542		206722	239068	761753	665965	234753	405256
HILICNEG	Medium-chain hydroxy acids and derivatives	Galactonic acid	Peak height	128869	C00880	C([C@H]([C@@H]([C@@H]([C@H](C(=O)O)O)O)O)O)O	RGHNJXZEOKUKBD-MGCNEYSASA-N	ONLI_0968	0	46372	74349.3	141578	29013	52309.7	41743.1	69073.2	37073.6	47891.2	43241	85472.4	52682.9	38417.2	36458.7	124161	118224	918025	21506.4	0	0	82761.3	964431	97112.7	25732.7	32472.8	43241	28073.1	38569.1	43034.1	71082.5	62052.4	65362.3	19734.7		21037.1	28394.7	30585.3	38491.6	47924.5	166079
HILICNEG	Hexoses	Galactose	Peak height	439353	C00962	C([C@@H]1[C@@H]([C@@H]([C@H]([C@@H](O1)O)O)O)O)O	WQZGKKKJIJFFOK-FPRJBGLDSA-N	ONLI_0969	9.87228e+07	4.73123e+07	8.69729e+07	7.14469e+07	6.66588e+07	7.66065e+07	7.41019e+07	6.17832e+07	8.14245e+07	7.99848e+07	8.7595e+07	8.0737e+07	6.92843e+07	4.80534e+07	8.00654e+07	7.69092e+07	1.00037e+08	9.23625e+07	4.88944e+07	9.25042e+07	9.32101e+06	4.03664e+07	7.63599e+07	9.31529e+07	6.80303e+07	1.13145e+08	8.01199e+07	9.59139e+07	5.93758e+07	8.08491e+07	5.65945e+07	6.7317e+07	7.3947e+07	6.23772e+07		5.98924e+07	6.84006e+07	6.90952e+07	8.60192e+07	74774880	4.56e+07
HILICNEG	Hydroxybenzoic acid derivatives	Gentisinic acid	Peak height	3469	C00628	C1=CC(=C(C=C1O)C(=O)O)O	WXTMDXOMEHJXQO-UHFFFAOYSA-N	ONLI_0972	257220	72865.3	229454	123090	733235	112027	119546	265142	406126	399232	169747	272188	228646	148665	524736	331169	239211	187780	165171	119051	92603.2	148091	338087	283681	335861	193237	175098	182627	528490	408587	324306	254866	192305	235770		229454	286400	163177	144991	151734	5094.2
HILICNEG	Alpha amino acids and derivatives	Guanidinoacetic acid	Peak height	763	C00581	C(C(=O)O)N=C(N)N	BPMFZUMJYQTVII-UHFFFAOYSA-N	ONLI_0988	113595	46949.4	111904	92706.6	125817	105684	100177	106187	188412	128363	122637	98282.3	104736	76766.2	130028	102931	136693	112879	91678.5	91804.3	4364.03	49961.8	166243	100157	113144	105345	97021.7	102505	83051.3	76009.5	79555.8	102121	81414.1	62149		63956.9	81412.9	120621	79131.6	72781.4	160490
HILICNEG	N-acyl-alpha amino acids	Hexanoylglycine	Peak height	99463		CCCCCC(=O)NCC(=O)O	UPCKIPHSXMXJOX-UHFFFAOYSA-N	ONLI_0989	2.66892e+06	488870	741242	1.12217e+06	1.1798e+06	1.46462e+06	2.72421e+06	880648	1.99292e+06	4.194e+06	2.101e+06	2.3371e+06	2.02518e+06	483698	764719	1.19183e+06	2.14841e+06	1.58761e+06	590734	3.13525e+06	219818	321707	1.50409e+06	766842	1.15625e+06	1.42027e+06	1.66485e+06	1.73714e+06	1339470	753566	1.05077e+06	1.43579e+06	2.31078e+06	1.04159e+06		644155	927788	1.15146e+06	2.69815e+06	1.13683e+06	34853.1
HILICNEG	Methoxyphenols	Homovanillic acid	Peak height	1738	C05582	COC1=C(C=CC(=C1)CC(=O)O)O	QRMZSPFSDQBLIX-UHFFFAOYSA-N	ONLI_0993	15947.2	33354.6	55166.8	4577.84	40887.6	27218.4	0	0	63947.6	32942.5	11627.6	0	18420.1	24265	109148	184854	30424.1	20976.1	168479	64849.5	0	26571.6	56310.9	175053	71272.6	29239	472809	38469	43057.4	20703.2	38294.4	48936.4	0	0		25785.3	21254.5	10178.8	64271.5	95305.5	0
HILICNEG	Indolecarboxylic acids and derivatives	Indole-3-carboxylic acid	Peak height	69867	C19837	C1=CC=C2C(=C1)C(=CN2)C(=O)O	KMAKOBLIOCQGJP-UHFFFAOYSA-N	ONLI_0995	445788	100725	354461	244400	323161	167956	256624	492463	517743	107720	180439	253365	250508	130023	382956	730291	340999	232490	230936	221062	0	182497	468438	189547	357157	400873	256245	225193	158125	236978	243148	512853	410928	109674		214414	242899	310951	171100	317226	35330.9
HILICNEG	Short-chain keto acids and derivatives	Ketoisovaleric acid	Peak height	49	C00141	CC(C)C(=O)C(=O)O	QHKABHOOEWYVLI-UHFFFAOYSA-N	ONLI_1000	6.88891e+06	2.48362e+06	3.15011e+06	3.97536e+06	7.30336e+06	4.47474e+06	5.00284e+06	6.2163e+06	6.19459e+06	7.2997e+06	5.06481e+06	4.43613e+06	5.35928e+06	2.57381e+06	5.46186e+06	3.00449e+06	6.40673e+06	4.78373e+06	3.74406e+06	4.62821e+06	853869	1.43228e+06	5.06675e+06	4.36804e+06	5.44335e+06	6.06997e+06	3.70947e+06	4.03312e+06	6.45572e+06	5.10045e+06	3.94737e+06	3.95885e+06	4.22076e+06	3.52705e+06		3.85357e+06	5.82534e+06	4.05085e+06	3.27287e+06	4.75791e+06	2.88638e+06
HILICNEG	Quinoline carboxylic acids	Kynurenic acid	Peak height	3845	C01717	C1=CC=C2C(=C1)C(=O)C=C(N2)C(=O)O	HCZHHEIFKROPDY-UHFFFAOYSA-N	ONLI_1001	222872	83558.4	137576	85804.4	206894	282891	360053	196124	446952	503253	165479	298129	259124	94436.5	339700	708073	346934	297474	111579	212271	33570	63057.1	255705	168963	158766	183944	521125	183828	254757	213095	301758	249896	140680	129817		161438	101374	270874	341628	181323	105716
HILICNEG	Sugar alcohols	Mannitol	Peak height	6251	C00392	C([C@H]([C@H]([C@@H]([C@@H](CO)O)O)O)O)O	FBPFZTCFMRRESA-KVTDHHQDSA-N	ONLI_1010	682900	370163	994101	645579	521439	469037	558152	509177	420674	486189	739349	492370	450625	292226	441336	1.08323e+06	548273	440867	393580	531942	46979.6	193880	387485	490212	437852	428984	493008	512062	458420	660914	314171	407063	485452	500645		348917	441932	402469	496483	519053	830968
HILICNEG	N-acyl-alpha amino acids	N-Acetylglycine	Peak height	10972		CC(=O)NCC(=O)O	OKJIRPAQVSHGFK-UHFFFAOYSA-N	ONLI_1015	1.67905e+06	721286	904864	1.15218e+06	472311	944002	1.83981e+06	653511	737456	1.52165e+06	1.31702e+06	1.31067e+06	1.07712e+06	381174	617219	557700	1.26119e+06	1.69624e+06	306614	960941	86145.4	211297	1.30631e+06	539287	556034	1.30963e+06	1.22266e+06	1.11303e+06	874736	511325	438542	490839	1.23979e+06	879465		547789	1.05252e+06	606764	1.49798e+06	1.13181e+06	904864
HILICNEG	Histidine and derivatives	N-Acetylhistidine	Peak height	273260	C02997	CC(=O)NC(CC1=CN=CN1)C(=O)O	KBOJOGQFRVVWBH-UHFFFAOYSA-N	ONLI_1016	1.95444e+06	1.10514e+06	2.10312e+06	1.36217e+06	2.35933e+06	2.49745e+06	2.03671e+06	2.10613e+06	5.05236e+06	2.29731e+06	1.66529e+06	2.76233e+06	2.27519e+06	598132	2.61873e+06	5.43875e+06	3.34164e+06	3.35171e+06	1.24059e+06	1.89416e+06	20939.8	401341	4.3429e+06	2.44133e+06	1.75039e+06	2.15014e+06	3.07804e+06	1.73679e+06	1.32676e+06	1.91222e+06	1.89994e+06	3.49666e+06	2.42863e+06	1.19177e+06		854500	1.14482e+06	2.0454e+06	2.26451e+06	968341	553652
HILICNEG	Tyrosine and derivatives	N-Acetyl-L-tyrosine	Peak height	68310	C01657	CC(=O)N[C@@H](CC1=CC=C(C=C1)O)C(=O)O	CAHKINHBCWCHCF-JTQLQIEISA-N	ONLI_1017	393960	245592	390365	305031	932692	313488	360225	554729	1.0024e+06	355941	322981	403327	468469	212261	414394	1.29156e+06	469118	622248	405104	461982	42506.3	149363	464083	370443	430036	672392	461706	245295	236980	480204	646537	1.18572e+06	512776	209411		304985	317755	611666	518443	402013	84417.7
HILICNEG	L-alpha-amino acids	N-epsilon-Acetyllysine	Peak height	92832	C02727	CC(=O)NCCCC[C@@H](C(=O)O)N	DTERQYGMUDWYAZ-ZETCQYMHSA-N	ONLI_1021	1.16092e+06	835218	2.03112e+06	1.65373e+06	1.53361e+06	1.41773e+06	1.57238e+06	1.67684e+06	1.56701e+06	1.61539e+06	1.50168e+06	1.67769e+06	1.63361e+06	1.04915e+06	1.66445e+06	3.8881e+06	3.09256e+06	3.32957e+06	815828	989388	10772.5	693076	3.7914e+06	1.30662e+06	1.18756e+06	2.18259e+06	1.81489e+06	1.18209e+06	1.00375e+06	1.24817e+06	1.54635e+06	2.11747e+06	1.83613e+06	887176		1.40014e+06	1.56976e+06	1.50411e+06	1.27391e+06	1.16875e+06	2.12751e+06
HILICNEG	N-acyl-alpha amino acids	N-Isovalerylglycine	Peak height	546304		CC(C)CC(=O)NCC(=O)O	ZRQXMKMBBMNNQC-UHFFFAOYSA-N	ONLI_1022	16569986	7.68723e+06	5.2713e+06	5.1712e+06	2.0813e+07	1.635e+07	2.28219e+07	1.25732e+07	2.14198e+07	2.98167e+07	1.01318e+07	1.43362e+07	2.30288e+07	2.26516e+06	1.76374e+07	2.07595e+07	2.41777e+07	8.6297e+06	6.77478e+06	1.14766e+07	405338	1.77751e+06	9.16582e+06	1.38277e+07	9.71887e+06	9.85991e+06	2.51387e+07	1.28758e+07	8.53705e+06	1.18101e+07	1.41587e+07	1.43635e+07	2.18608e+07	1.20835e+07		5.0741e+06	8.16875e+06	1.10641e+07	1.99454e+07	8.5102e+06	2.04338e+06
HILICNEG	Pyrimidinecarboxylic acids	Orotic acid	Peak height	967	C00295	C1=C(NC(=O)NC1=O)C(=O)O	PXQPEWDEAKTCGB-UHFFFAOYSA-N	ONLI_1026	3.71e+06	1.85413e+06	1.94402e+06	1.39378e+06	2.10963e+06	2.97216e+06	4.49827e+06	2.51874e+06	2594753	2.67077e+06	2.79603e+06	3.74976e+06	2.87732e+06	782142	1.622e+06	2.3839e+06	3.57911e+06	2.30568e+06	1.02038e+06	2.27877e+06	174360	447804	2.72095e+06	1.68124e+06	1.9329e+06	1.87842e+06	3.57039e+06	3.76908e+06	2.51705e+06	1.57307e+06	1.361e+06	2.19015e+06	4.44565e+06	2.75092e+06		1.36929e+06	1.36873e+06	1.68666e+06	4.21839e+06	1.35119e+06	231833
HILICNEG	Phenolic glycosides	Phenyl glucuronide	Peak height	87235		C1=CC=C(C=C1)O[C@H]2[C@@H]([C@H]([C@@H]([C@H](O2)C(=O)O)O)O)O	WVHAUDNUGBNUDZ-GOVZDWNOSA-N	ONLI_1028	872659	31629.9	38483.1	39788.8	92046.4	467569	163123	188862	166540	231720	529269	550536	448942	109597	174429	287999	431320	822872	122400	103614	27209.7	70667.1	120518	250093	107872	211276	140866	108085	161761	49677.5	181295	224561	87362.1	71012.8		133875	55665.6	62554.7	412506	544936	0
HILICNEG	Phenylpyruvic acid derivatives	Phenylpyruvic acid	Peak height	997	C00166	C1=CC=C(C=C1)CC(=O)C(=O)O	BTNMPGBKDVTSJY-UHFFFAOYSA-N	ONLI_1031	4.21001e+06	2.51407e+06	2.48455e+06	2.90172e+06	7.68563e+06	1.7766e+06	2.05065e+06	1.94907e+06	1.76811e+07	3.13274e+06	1.97183e+06	4.91267e+06	5.36811e+06	946237	3.80475e+06	1.30933e+07	2.90172e+06	2.16655e+06	2.97271e+06	2.50043e+06	709814	2.29115e+06	3.00803e+06	4.69601e+06	4.48307e+06	2.48288e+06	4.57408e+06	2.09816e+06	2.57471e+06	2.82584e+06	7.85083e+06	8.99298e+06	3.1534e+06	2.29447e+06		1.52665e+06	1.43425e+06	1.02723e+07	6.21764e+06	1.76726e+06	87785.4
HILICNEG	Dipeptides	Ser-Asn	Peak height	13071897		C(C(C(=O)O)NC(=O)C(CO)N)C(=O)N	LTFSLKWFMWZEBD-UHFFFAOYSA-N	ONLI_1038	Inf	Inf	Inf	NA	14628.2	43900.4	8545.94	36185	NA	12793.1	NA	Inf	Inf	NA	NA	NA	Inf	26377.9	10557.9	17741.6	0	NA	129978	16903.3	16500.5	22098.6	29079.9	3215.52	6394.21	16984.7	37883.1	48487	79546.7	66449		4901.72	70068.2	29262.2	15773.4	14698.9	Inf
HILICNEG	Monosaccharides	Sorbose	Peak height	6904	C00247	C([C@@H]([C@H]([C@@H](C(=O)CO)O)O)O)O	BJHIKXHVCXFQLS-OTWZMJIISA-N	ONLI_1041	1.4561e+06	5.06291e+06	1674803	2.44783e+06	1.12126e+06	2.94445e+06	608614	1.22683e+06	1.13017e+06	1.30596e+06	3.16217e+06	1.01917e+06	649759	462952	1.14184e+06	2.14668e+06	2.26989e+06	1.55006e+06	1.03289e+06	963756	603429	2.64756e+06	940020	3.1729e+06	1.27638e+06	906090	973848	1.98269e+06	1.83874e+06	825200	641201	2.73164e+06	3.83719e+06	1.36289e+06		2.62817e+06	1.67843e+06	1.92097e+06	2.41786e+06	2.21836e+06	4.25053e+06
HILICNEG	S-sulfo-L-cysteines	S-Sulfocysteine	Peak height	115015	C05824	C([C@@H](C(=O)O)N)SS(=O)(=O)O	NOKPBJYHPHHWAN-REOHCLBHSA-N	ONLI_1042	131633	152736	145150	177612	448241	239962	28237.8	52737.6	95681.3	183214	53351.4	235544	548677	144901	215765	238005	334254	495146	106830	213398	11013	219822	710700	113612	34806.9	132823	133968	242438	183042	136327	115554	170720	156417	112409		59475.6	197680	117526	151690	72937.4	130903
HILICNEG	Xanthines	Theophylline	Peak height	2153	C07130	CN1C2=C(C(=O)N(C1=O)C)NC=N2	ZFXYFBGIUFBOJW-UHFFFAOYSA-N	ONLI_1047	NA	NA	Inf	Inf	13571.9	29406.4	17198.7	18187.2	Inf	17410.3	20111.4	16253.1	11095.4	17317.9	0	13776.4	22945.1	28005.3	16452.1	0	6833.49	37458.6	29397.2	33693	7892.39	8476.08	22990.3	9678.32	46646	22295.3	17531.6	20837.1	75432.3	31883.8		17715.3	18867.4	20871	25499.1	18467	3.51962e+06
HILICNEG	Pyrimidine 2'-deoxyribonucleosides	Thymidine	Peak height	5789	C00214	CC1=CN(C(=O)NC1=O)[C@H]2C[C@@H]([C@H](O2)CO)O	IQFYYKKMVGJFEH-XLPZGREQSA-N	ONLI_1051	772143	256502	394036	429487	931604	637276	716643	733235	688312	1.25347e+06	674394	632261	442135	464283	857051	565675	720408	996920	301150	488580	87639.6	317819	1.03278e+06	623802	382268	1.0676e+06	565323	855454	510027	517272	559471	949292	644214	310490		428519	688230	639779	460962	550107	37888.2
HILICNEG	Medium-chain fatty acids	trans-Traumatic acid	Peak height	5283028	C16308	C(CCCCC(=O)O)CCC/C=C/C(=O)O	MAZWDMBCPDUFDJ-VQHVLOKHSA-N	ONLI_1053	1.90438e+06	330105	600554	403604	654688	868510	1.48892e+06	822831	540102	2.45615e+06	962090	791729	652125	314281	850457	1.38993e+06	803380	678986	355648	2.37286e+06	43552.2	355160	942382	858259	781747	650392	2.17053e+06	662598	559258	738002	518039	769542	1.31715e+06	482813		433414	761469	764244	887417	593682	927550
HILICNEG	Dipeptides	Val-Asp	Peak height	9964657		CC(C)C(C(=O)NC(CC(=O)O)C(=O)O)N	OBTCMSPFOITUIJ-UHFFFAOYSA-N	ONLI_1059	NA	Inf	Inf	Inf	6911.56	36476.9	22828.7	17982.2	NA	17210.2	NA	NA	NA	NA	NA	NA	Inf	20553.2	3505.09	7076.78	0	NA	70238.4	7427.6	9072	13458.3	12844.8	5768.02	18140	0	18143.4	7779.52	30069	27588.7		4192.68	12504.3	0	4950.16	5302.32	Inf
BileAcid_Steroids	21-hydroxysteroids	cortisol	nM/L	5754	C00735	C[C@]12CCC(=O)C=C1CC[C@@H]3[C@@H]2[C@H](C[C@]4([C@H]3CC[C@@]4(C(=O)CO)O)C)O	JYGXADMDTFJGBT-VWUMJDOOSA-N	ONLI_1061				3.13	3.11								3.23	3.19					3.13				3.08		3.28									3.07	3.08		3.16	3.06			3.15
BileAcid_Steroids	21-hydroxysteroids	cortisone	nM/L	222786	C00762	C[C@]12CCC(=O)C=C1CC[C@@H]3[C@@H]2C(=O)C[C@]4([C@H]3CC[C@@]4(C(=O)CO)O)C	MFYSYFVPBJMHGN-ZPOLXVRWSA-N	ONLI_1063							0.71	0.71									0.7	0.7
BileAcid_Steroids	21-hydroxysteroids	corticosterone	nM/L	5753	C02140	C[C@]12CCC(=O)C=C1CC[C@@H]3[C@@H]2[C@H](C[C@]4([C@H]3CC[C@@H]4C(=O)CO)C)O	OMFXVFTZEKFJBZ-HJTSIMOOSA-N	ONLI_1064	126.34	233.91	99.61	97.39	97.71	233.25	8.88	115.69	73.59	111.26	71.29	8.85	16.02	19.03	854.48	114.15	6.89	25.16	16.28	288.28	369.25	133.89	166.34	150.85	265.27	60.05	20.04	283.95	47.09	140.66	67.74	87.3	9.77	8.64	95.65	1107.09	58.93	47.88	161.52	925.43	22.23
BileAcid_Steroids	Gluco/mineralocorticoids, progestogins and derivatives	progesterone	nM/L	5994	C00410	CC(=O)[C@H]1CC[C@@H]2[C@@]1(CC[C@H]3[C@H]2CCC4=CC(=O)CC[C@]34C)C	RJKFOVLPORLFTN-LEKSSAKUSA-N	ONLI_1065			1.91	1.64	0.94					0.61	0.59		0.73	2.48	2.23	3.43				0.58	0.74		0.89	1.29	7.85			1.92				2.41			0.95	2.49	0.86	0.78	1.02	3.57
BileAcid_Steroids	Androgens and derivatives	testosterone	nM/L	6013	C00535	C[C@]12CC[C@H]3[C@H]([C@@H]1CC[C@@H]2O)CCC4=CC(=O)CC[C@]34C	MUMGGOZAMZWBJJ-DYKIIFRCSA-N	ONLI_1069	1.26	0.66				2.86	1.23				1.31						1.61	0.57		1.67	0.83							10.95	1.64										6.9
BileAcid_Steroids	Sulfated steroids	dehydroepiandrosterone sulfate	nM/L	12594	C04555	C[C@]12CC[C@H]3[C@H]([C@@H]1CCC2=O)CC=C4[C@@]3(CC[C@@H](C4)OS(=O)(=O)O)C	CZWCKYRVOZZJNM-USOAJAOKSA-N	ONLI_1070																			991.78																646.47						1808.66
BileAcid_Steroids	21-hydroxysteroids	cortexone	nM/L	6166	C03205	C[C@]12CC[C@H]3[C@H]([C@@H]1CC[C@@H]2C(=O)CO)CCC4=CC(=O)CC[C@]34C	ZESRJSPZRDMNHY-YFWFAHHUSA-N	ONLI_1071	1.76	6.11	7.16			5.18		4.35	2.89	7.06	3.5				19.9			0.92		13.15	7.47	7.98		9.17		4.5		19.87	1.39	5.87	2.74					66.99			10.63	40.01
BileAcid_Steroids	Gluco/mineralocorticoids, progestogins and derivatives	17-OH pregnenolone	nM/L	91451	C05138	CC(=O)[C@]1(CC[C@@H]2[C@@]1(CC[C@H]3[C@H]2CC=C4[C@@]3(CC[C@@H](C4)O)C)C)O	JERGUCIJOXJXHF-TVWVXWENSA-N	ONLI_1077												267.17	221.49										226.1														226.28				173.46
BileAcid_Steroids	Gluco/mineralocorticoids, progestogins and derivatives	20-hydroxyprogesterone	nM/L	92747	C04042	C[C@H]([C@H]1CC[C@@H]2[C@@]1(CC[C@H]3[C@H]2CCC4=CC(=O)CC[C@]34C)C)O	RWBRUCCWZPSBFC-SJOKZOANSA-N	ONLI_1078			12.19																					12.46		12.72										13.19				5.83
BileAcid_Steroids	Androgens and derivatives	androstanediol	nM/L	441301	C07632	C[C@]12CC[C@H](C[C@@H]1CC[C@@H]3[C@@H]2CC[C@]4([C@H]3CCC4O)C)O	CBMYJHIOYJEBSB-UNPXRYTGSA-N	ONLI_1080															5.98					8.43		9.88				8.25
BileAcid_Steroids	Estrogens and derivatives	estrone	nM/L	5870	C00468	C[C@]12CC[C@H]3[C@H]([C@@H]1CCC2=O)CCC4=C3C=CC(=C4)O	DNXHEGUUPJUMQT-CBZIJGRNSA-N	ONLI_1084												11.54								23.94			10.5
BileAcid_Steroids	Estrogens and derivatives	estradiol	nM/L	5757	C00951	C[C@]12CC[C@H]3[C@H]([C@@H]1CC[C@@H]2O)CCC4=C3C=CC(=C4)O	VOXZDWNPVJITMN-ZBRFXRBCSA-N	ONLI_1085																				0.54
BileAcid_Steroids	Gluco/mineralocorticoids, progestogins and derivatives	pregnenolone	nM/L	8955	C01953	CC(=O)[C@H]1CC[C@@H]2[C@@]1(CC[C@H]3[C@H]2CC=C4[C@@]3(CC[C@@H](C4)O)C)C	ORNBQBCIOKFOEO-QGVNFLHTSA-N	ONLI_1088					12.36														13.63								17.94						10.49		13.6
BileAcid_Steroids	Taurinated bile acids and derivatives	Taurodehydrocholate	nM/L	121933		C[C@H](CCC(=O)NCCS(=O)(=O)O)[C@H]1CC[C@@H]2[C@@]1(C(=O)C[C@H]3[C@H]2C(=O)C[C@H]4[C@@]3(CCC(=O)C4)C)C	UBDJSBRKNHQFPD-PYGYYAGESA-N	ONLI_1091			8.01					8.59		7.71														7.78							8.2						9.33
BileAcid_Steroids	Taurinated bile acids and derivatives	Tauro-omega-Muricholic acid	nM/L	118703092		C[C@H](CCC(=O)NCCS(=O)(=O)O)[C@H]1CC[C@@H]2[C@@]1(CC[C@H]3[C@H]2[C@H]([C@@H]([C@H]4[C@@]3(CC[C@H](C4)O)C)O)O)C	XSOLDPYUICCHJX-SYCKBGHMSA-N	ONLI_1092	338.02	372.65	295.09		142.92	383.78	101.44	474.14	612.06	372.93	75.44	217.29	179.57	505.71	157.56	502.61	74.98	79.88	223.09	17291	148.32	226.41	389.09	464.21	214.34	630	151.62	382.07	145.36	457.5	197.87	345.21			185.39	206.52	224.51	418.18	255.22	326.41	110.51
BileAcid_Steroids	Trihydroxy bile acids, alcohols and derivatives	Tauro-a-Muricholic acid	nM/L	53477700		C[C@H](CCC(=O)O)C1CC[C@@H]2[C@@]1(CC[C@H]3[C@H]2[C@@H]([C@H]([C@H]4[C@@]3(CC[C@H](C4)O)C)O)O)C	DKPMWHFRUGMUKF-LPMPYYIQSA-N	ONLI_1093	4.44	21.24	15.12		35.81	37.33	3.83	36.63	25.38	63.26	6.35	18.81	9.52	38.17	1.44	120.44	4.13	4.52	45.79	1586.71	85.5	4.79	45.62	51.06	23.84	44.63	17.86	50.32	5.46	37.5	36.72	44.11			21.31	6.85	38.69	37.26	6.01	36.74	18.42
BileAcid_Steroids	Taurinated bile acids and derivatives	Tauro-ß-Muricholic acid	nM/L	168408		C[C@H](CCC(=O)NCCS(=O)(=O)O)[C@H]1CCC2[C@@]1(CCC3C2[C@H]([C@H]([C@H]4[C@@]3(CC[C@H](C4)O)C)O)O)C	XSOLDPYUICCHJX-OEYGYFRSSA-N	ONLI_1094	48.68	35.32	21.85		53.24	65.96	12.62	42.35	117.75	89.61	11.62	37.04	13.81	39.01	13.83	92.87	9.75	11.55	35.61	12497.1	9.75	18.58	76.8	87.9	31.73	85.35	36.82	195.22	14.77	37.53	44.45	63.23			50.03	133.3	78.19	35.14	15.9	124.98	25.09
BileAcid_Steroids	Taurinated bile acids and derivatives	Tauroursodeoxycholic acid	nM/L	12443252	C16868	C[C@H](CCC(=O)NCCS(=O)(=O)O)[C@H]1CC[C@@H]2[C@@]1(CC[C@H]3[C@H]2[C@H](CC4[C@@]3(CC[C@H](C4)O)C)O)C	BHTRKEVKTKCXOH-VSHSPWMTSA-N	ONLI_1095			67.87		65.63		16	211.81		100.36	34.44	42.84	44.94	103.33		119.11	22.99	11.37	118.92				244.84	221.64	159.16		57.39		25.26		95.65	95.33			32.14		58.92	136.87			28.67
BileAcid_Steroids	Trihydroxy bile acids, alcohols and derivatives	Taurocholic acid	nM/L	6675	C05122	C[C@H](CCC(=O)NCCS(=O)(=O)O)[C@H]1CC[C@@H]2[C@@]1([C@H](C[C@H]3[C@H]2[C@@H](C[C@H]4[C@@]3(CC[C@H](C4)O)C)O)O)C	WBWWGRHZICKQGZ-HZAMXZRMSA-N	ONLI_1096	261.96	422.37	116.84		326.64	360.61	25.92	266.48	963.57	432.69	75.63	88.5	63.14	241.89	147.53	604.62	47.78	22.94	391.16	17653.6	274.56	184.88	801.36	565.91	261.26	1438.17	109.19	951.43	59.19	462.71	336.27	301.89			186.57	507.11	468	724.69	208.94	982.68	206.95
BileAcid_Steroids	Trihydroxy bile acids, alcohols and derivatives	omega-Muricholic acid	nM/L	5283851	C17727	C[C@H](CCC(=O)O)[C@H]1CC[C@@H]2[C@@]1(CC[C@H]3[C@H]2[C@H]([C@@H]([C@H]4[C@@]3(CC[C@H](C4)O)C)O)O)C	DKPMWHFRUGMUKF-NTPBNISXSA-N	ONLI_1097			4.75		7.97	11.31	2.52	9.8		15.54	3.88	9.07	3.91	9.26	631.93	23.47	4.81	3.9	6.37		1562.86	24447.4	7.81	9.89	7.12		4.93	18.52	3.34		13.01	9.94			6.85	1019.84	10.59	6.44			6.09
BileAcid_Steroids	Glycinated bile acids and derivatives	Glycoursodeoxycholic acid	nM/L	12310288		C[C@H](CCC(=O)NCC(=O)O)[C@H]1CC[C@@H]2[C@@]1(CC[C@H]3[C@H]2[C@H](C[C@H]4[C@@]3(CC[C@H](C4)O)C)O)C	GHCZAUBVMUEKKP-XROMFQGDSA-N	ONLI_1098	36.57	76.92	1105.45	656.55	190.53	255	141.33	1725.75	14.94	542.83	68.52	640.51	119.52	527.52	6.12	218.86	105.66	63.33	190.24	163.9	10.24	26.35	113.78	582.07	73.45	28.19	106.72	21.18	123.11	44.91	219.32	169.99	13.44	3.76	22.48	12.74	60.97	104.42	5.42	10.9	31.07
BileAcid_Steroids	Glycinated bile acids and derivatives	Glycohyodeoxycholic acid	nM/L	114611		C[C@H](CCC(=O)NCC(=O)O)[C@H]1CC[C@@H]2[C@@]1(CC[C@H]3[C@H]2C[C@@H]([C@H]4[C@@]3(CC[C@H](C4)O)C)O)C	SPOIYSFQOFYOFZ-BRDORRHWSA-N	ONLI_1099
BileAcid_Steroids	Glycinated bile acids and derivatives	Glycocholic acid	nM/L	10140	C01921	C[C@H](CCC(=O)NCC(=O)O)[C@H]1CC[C@@H]2[C@@]1([C@H](C[C@H]3[C@H]2[C@@H](C[C@H]4[C@@]3(CC[C@H](C4)O)C)O)O)C	RFDAIACWWDREDC-FRVQLJSFSA-N	ONLI_1101			3.09		5.03			12.54		10.98		2.05	1.01	7.1		10.2			4.59	3.17			5.68	12.88	1.14		1.01				5.31	7.93					3.47	10.38			3.25
BileAcid_Steroids	Trihydroxy bile acids, alcohols and derivatives	ß-Muricholic acid	nM/L	5283853	C17726	C[C@H](CCC(=O)O)[C@H]1CC[C@@H]2[C@@]1(CC[C@H]3[C@H]2[C@H]([C@H]([C@H]4[C@@]3(CC[C@H](C4)O)C)O)O)C	DKPMWHFRUGMUKF-CRKPLTDNSA-N	ONLI_1102	3.4	10.19	1134.75		42.12	25.4	140.01	1769.81		556.27	72.16	89.77	43.64	31.96		20.06	109.91	73.92	19.52	180.28	1.57		53.4	595.72	1.36	1.2	12.73	1.74	126.05	2.87	236.23	7.79			1.46		69.52	34.19		3.33	122.43
BileAcid_Steroids	Taurinated bile acids and derivatives	Taurochenodeoxycholic acid	nM/L	387316	C05465	C[C@H](CCC(=O)NCCS(=O)(=O)O)[C@H]1CC[C@@H]2[C@@]1(CC[C@H]3[C@H]2[C@@H](C[C@H]4[C@@]3(CC[C@H](C4)O)C)O)C	BHTRKEVKTKCXOH-BJLOMENOSA-N	ONLI_1103	39.81	253.48	37.41		110.69	311.91	6.77	106.68	70.64	79.07	14.77	15.89	15.62	76.93	21.49	48	16.23	4.57	81.43	221.09		64.97	73.23	113.27	51.66	102.36	14.52	68.5	7		48.25	47.04			17.58	4.73	61.23	89.23		82.57	27.66
BileAcid_Steroids	Taurinated bile acids and derivatives	Taurodeoxycholic acid	nM/L	2733768	C05463	C[C@H](CCC(=O)NCCS(=O)(=O)O)[C@H]1CC[C@@H]2[C@@]1([C@H](C[C@H]3[C@H]2CC[C@H]4[C@@]3(CC[C@H](C4)O)C)O)C	AWDRATDZQPNJFN-VAYUFCLWSA-N	ONLI_1104	136.74	78.23	41.81	168.27	473.45	144.71	8.43	125.78	10.49	54.71	3.54	521.46	50.11	220.12	2.48	124.36	5.45	6.34	111.11	1078.29	29.94	14.33	43.03	20.03	12.34	19.21	172.18	26.87	12.51	26.71	27.79	102.73			26.77	148.01	117.01	24.12		49.55	52.45
BileAcid_Steroids	Trihydroxy bile acids, alcohols and derivatives	Cholic acid	nM/L	221493	C00695	C[C@H](CCC(=O)O)[C@H]1CC[C@@H]2[C@@]1([C@H](C[C@H]3[C@H]2[C@@H](C[C@H]4[C@@]3(CC[C@H](C4)O)C)O)O)C	BHQCQFFYRZLCQQ-OELDTZBJSA-N	ONLI_1105	112.82	200	543.82	990.1	936.99	505.68	91.98	1747.34	15.62	1066.09	71.89	498.61	73.82	588.19	4.06	288.21	96.82	72.89	334.1	2919.28	75.86	22.67	109.15	568.52	6.81	88.96	257.31	42.17	144.44	94.02	654.43	180.42	8.67		13.74	43.4	135.68	17.39		67.03	44.12
BileAcid_Steroids	Dihydroxy bile acids, alcohols and derivatives	Ursodeoxycholic acid	nM/L	31401	C07880	C[C@H](CCC(=O)O)[C@H]1CC[C@@H]2[C@@]1(CC[C@H]3[C@H]2[C@H](C[C@H]4[C@@]3(CC[C@H](C4)O)C)O)C	RUDATBOHQWOJDD-UZVSRGJWSA-N	ONLI_1106			1.05	7141				2.97		1.15				1.69	14.68	2.29			1.88		24.19			1.46	2.39						1.52	1.64		6658.24
BileAcid_Steroids	Glycinated bile acids and derivatives	Glycochenodeoxycholic acid	nM/L	12544	C05466	C[C@H](CCC(=O)NCC(=O)O)[C@H]1CC[C@@H]2[C@@]1(CC[C@H]3[C@H]2[C@@H](C[C@H]4[C@@]3(CC[C@H](C4)O)C)O)C	GHCZAUBVMUEKKP-GYPHWSFCSA-N	ONLI_1107												1.05	1.2	1.3																											1.52
BileAcid_Steroids	Pyrrolopyrimidine nucleosides and nucleotides	Glycodeoxycholic acid	nM/L	5604	C05464	C1=CN(C2=NC=NC(=C21)N)C3C(C(C(O3)CO)O)O	HDZZVAMISRMYHH-UHFFFAOYSA-N	ONLI_1108	3.01		33.43			11.51		94.25		22.18	9.57	17.44	5.68	20.75		21.89	4.22	3.42	13.18	144.03		2.91		12.73			10.19		1.11		24.01	6.82								1.88
BileAcid_Steroids	Taurinated bile acids and derivatives	Taurolithocholic acid	nM/L	439763	C02592	C[C@H](CCC(=O)NCCS(=O)(=O)O)[C@H]1CC[C@@H]2[C@@]1(CC[C@H]3[C@H]2CC[C@H]4[C@@]3(CC[C@H](C4)O)C)C	QBYUNVOYXHFVKC-GBURMNQMSA-N	ONLI_1109								1.26																																	1.46
BileAcid_Steroids	Dihydroxy bile acids, alcohols and derivatives	Chenodeoxycholic acid	nM/L	10133	C02528	C[C@H](CCC(=O)O)[C@H]1CC[C@@H]2[C@@]1(CC[C@H]3[C@H]2[C@@H](C[C@H]4[C@@]3(CC[C@H](C4)O)C)O)C	RUDATBOHQWOJDD-BSWAIDMHSA-N	ONLI_1110	61.38	108.28	461.4	61.43	418.33	138.42	55.49	1128.6	33.45	338.73	57.94	71.73	48.23	271.94	34.79	155.25	45.86	30.33	258.21	73.79	46.73	55.82	195.41	561.95	213.47	57.49	45.57	14.3	29.99	37.21	268.96	168.49			27.82	72.28	119.75	176.61	3.09	38.33	71.57
BileAcid_Steroids	Dihydroxy bile acids, alcohols and derivatives	Deoxycholic acid	nM/L	222528	C04483	C[C@H](CCC(=O)O)[C@H]1CC[C@@H]2[C@@]1([C@H](C[C@H]3[C@H]2CC[C@H]4[C@@]3(CC[C@H](C4)O)C)O)C	KXGVEGMKQFWNSR-LLQZFEROSA-N	ONLI_1111	28.36	87.14	46.72		75.07	32.18	18.41	219.71	3.7	53.74	20.88	20.44	7.08	27.76	2.28	49.19	12.05	10.95	28.3	218.21	10.2	6.02	8.11	71.01	6.48	30.53	13.96	5.78	5.44	13.88	48.12	27.85				81.98	17.8	21.34		6.61
BileAcid_Steroids	Monohydroxy bile acids, alcohols and derivatives	Lithocholic acid	nM/L	9903	C03990	C[C@H](CCC(=O)O)[C@H]1CC[C@@H]2[C@@]1(CC[C@H]3[C@H]2CC[C@H]4[C@@]3(CC[C@H](C4)O)C)C	SMEROWZSTRWXGI-HVATVPOCSA-N	ONLI_1113			28.55				17.86	60.63			19.46						13.2	16.91						28.62					22.53		57.43							98.85
Oxylipins	Thromboxanes	TXB2	nM/L	5283137	C05963	CCCCC[C@@H](/C=C/[C@@H]1[C@H]([C@H](CC(O1)O)O)C/C=C\CCCC(=O)O)O	XNRNNGPBEPRNAR-JQBLCGNGSA-N	ONLI_1125	3.13	5.83	4.03	7	18.55	3.99	19.85	10.18	8.11	2.3	7.82	0.37		0.31		13.23	2.17	2.14	0.42	0.76	0.82	0.38	0.87	2.14		0.45		0.41	2.29	0.32	2.38		0.45		0.27	1.71		0.41	0.37	0.77	1.96
Oxylipins	Prostaglandins and related compounds	6-keto-PGF1alpha	nM/L	5280888	C05961	CCCCC[C@@H](/C=C/[C@H]1[C@@H](C[C@@H]([C@@H]1CC(=O)CCCCC(=O)O)O)O)O	KFGOFTHODYBSGM-ZUNNJUQCSA-N	ONLI_1126		0.54	0.37	0.47	0.52		0.6	0.51								0.43
Oxylipins	Prostaglandins and related compounds	PGE2	nM/L	5280360	C00584	CCCCC[C@@H](/C=C/[C@H]1[C@@H](CC(=O)[C@@H]1C/C=C\CCCC(=O)O)O)O	XEYBRNLFEZDVAW-ARSRFYASSA-N	ONLI_1128				2.66	3.63		2.46																							3.65
Oxylipins	Prostaglandins and related compounds	PGD2	nM/L	448457	C00696	CCCCC[C@@H](/C=C/[C@@H]1[C@H]([C@H](CC1=O)O)C/C=C\CCCC(=O)O)O	BHMBVRSPMRCCGG-OUTUXVNYSA-N	ONLI_1129			1.96			12.81		1.01	8.06		1.47				54.52					133.74	29.94	95.49		5.7		129.37		20.03	3.47	8.71	3.83					35.34			197.81	21.44	12.61
Oxylipins	Prostaglandins and related compounds	PGE3	nM/L	5280937	C06439	CC/C=C\C[C@@H](/C=C/[C@H]1[C@@H](CC(=O)[C@@H]1C/C=C\CCCC(=O)O)O)O	CBOMORHDRONZRN-QLOYDKTKSA-N	ONLI_1133	172.66	751.05				591.29			1090.69						620.37					1213.89	439.44	2257.36				851.39		392.75		1550.91						722.95	0.34		1003.95	1468.41
Oxylipins	Prostaglandins and related compounds	PGF3alpha	nM/L	5280940	C06476	CC/C=C\C[C@@H](/C=C/[C@H]1[C@@H](C[C@@H]([C@@H]1C/C=C\CCCC(=O)O)O)O)O	SAKGBZWJAIABSY-SAMSIYEGSA-N	ONLI_1134			0.37	0.57				0.3		0.34				0.29		0.41			0.35	0.61			0.38	0.49	0.4	0.32					0.31	0.33									0.26
Oxylipins	Long-chain fatty acids	9,12,13-TriHOME	nM/L	9858729	C14833	CCCCC[C@@H]([C@H](/C=C/[C@H](CCCCCCCC(=O)O)O)O)O	MDIUMSLCYIJBQC-MVFSOIOZSA-N	ONLI_1135	1.21	3.42	0.98	4.19	3.77	2.14	1.18	1.31	4.02	3.65	1.16	1.5	1.31	0.72	1.65	13.71	1.09	1.26	1.03	15.21	1.7	1.01	1.66	2.08	1.53		1.04	0.95	1.62	1.08	1.16	2.28	1.34	1.26	0.96	1.16	0.89	1.35	2.05	1.28	0.98
Oxylipins	Long-chain fatty acids	9,10-e-DiHO	nM/L	441460		CCCCCCCC[C@H]([C@H](CCCCCCCC(=O)O)O)O	VACHUYIREGFMSP-SJORKVTESA-N	ONLI_1138	2.02	3.71	2.7	3.1	5.36	3.44	2.92	2.83	6.15	6.01	2.96	1.95	2.38	1.66	4.53	18.2	2.48	4.52	4.28	8.08	4.16	3.02	5.55	4.58	5.84	1.19	2.3	1.97	4.69	2.75	2.93	5.8	6.24	3.41	3.51	2.21	2.07	3.72	6.2	1.41	3.21
Oxylipins	Long-chain fatty acids	12_13-DiHOME	nM/L	10236635	C14829	CCCCCC(C(C/C=C\CCCCCCCC(=O)O)O)O	CQSLTKIXAJTQGA-FLIBITNWSA-N	ONLI_1139	23.36	13.02	13.81	15.29	27.52	10.53	18.09	14.51	12.39	13.68	9.97	7.5	12.95	7.94	14.98	23.03	13.34	20.41	10.66	36.18	10.21	12.87	20.68	17.75	31.26	13.49	10.54	15.34	20.42	12.09	8.24	18.49	18.69	12.86	20.4	21.25	17.93	12.07	15.99	13.02	13.3
Oxylipins	Long-chain fatty acids	9,10-DiHOME	nM/L	9966640	C14828	CCCCC/C=C\CC(C(CCCCCCCC(=O)O)O)O	XEBKSQSGNGRGDW-YFHOEESVSA-N	ONLI_1140	15.83	12.69	8.89	13.08	17.16	8.17	10.97	10.54	12.46	11.82	5.98	6.39	9.44	5.34	13.1	26.78	10.46	13.9	9.13	26.26	10.07	10.51	15.69	12.11	22.12	9.88	9.14	13.43	15.38	10.57	6.77	21.77	16.48	10.36	13.2	16.04	11.86	12.53	15.49	9.81	10.83
Oxylipins	Linoleic acids and derivatives	15,16-DiHODE	nM/L	16061068		CCC(C(C/C=C\C/C=C\CCCCCCCC(=O)O)O)O	LKLLJYJTYPVCID-OHPMOLHNSA-N	ONLI_1141	4.73	6.19	3.04	5.21	8.01	3.05	5.83	5.04	6.11	6.34	2.99	3.87	5.32	2.06	7.04	10.98	5.35	8.06	5.03	9.26	5.65	4.43	5.93	3.84	10.45	3.19	6.65	8.22	8.65	5.86	5.37	16.99	9.99	8.2	7.03	6.66	4.63	7.39	7.06	4.58	6.46
Oxylipins	Linoleic acids and derivatives	12,13-DiHODE	nM/L	16061067		CC/C=C\CC(C(C/C=C\CCCCCCCC(=O)O)O)O	RGRKFKRAFZJQMS-OOHFSOINSA-N	ONLI_1142	1.45	1.05			2.41		1.69	1.28	1.28	1.4		1.11	1.44		1.56	2.31	1.19	2.06	1.25	2.59	1.72	1.47	1.77	1.57	2.84	1.14	1.76	1.62	2.46	1.45	1.26	2.04	2.12	1.57	1.85	1.81	1.34	1.17	2.07	1.2	1.73
Oxylipins	Linoleic acids and derivatives	9,10-DiHODE	nM/L	16061066		CC/C=C\C/C=C\CC(C(CCCCCCCC(=O)O)O)O	QRHSEDZBZMZPOA-ZJSQCTGTSA-N	ONLI_1143	1.13	1.35	0.47	1.19	1.62	0.74	0.79	0.85	1.34	1.37	0.55	0.76	1.06	0.3	1.58	3.22	1.11	1.33	0.98	1.62	1.21	1.04	1.48	0.9	2.3	0.76	1.25	1.77	1.62	1.45	0.95	3.78	2.5	1.7	1.19	1.58	0.88	1.84	1.97	0.8	1.42
Oxylipins	Hydroxyeicosatrienoic acids	14,15-DiHETrE	nM/L	5283147	C14775	CCCCCC(C(C/C=C\C/C=C\C/C=C\CCCC(=O)O)O)O	SYAWGTIVOGUZMM-ILYOTBPNSA-N	ONLI_1144	1.34	0.64	1.28	1.51	1.58	0.95	1.48	1.78	0.7	0.88	0.87	0.65	1.04	1.55	0.78	0.99	1.07	1.12	0.69	1.39	0.58	1.05	1.45	1.06	1.79	1.11	0.63	1	1	1.07	0.76	0.63	0.88	0.74	1.68	1.65	1.65	1.03	0.51	1.78	0.57
Oxylipins	Hydroxyeicosatrienoic acids	11,12-DiHETrE	nM/L	5283146	C14774	CCCCC/C=C\CC(C(C/C=C\C/C=C\CCCC(=O)O)O)O	LRPPQRCHCPFBPE-KROJNAHFSA-N	ONLI_1145	0.73	0.39	0.89	1.12	0.94	0.65	0.86	1.28	0.52	0.76	0.57	0.52	0.63	1.06	0.58	0.7	0.63	0.59	0.59	0.78	0.42	0.83	0.98	0.72	1.21	0.85	0.34	0.63	0.58	0.91	0.58	0.58	0.55	0.51	0.8	1.01	1.11	0.71	0.34	1.36	0.45
Oxylipins	Hydroxyeicosatrienoic acids	8,9-DiHETrE	nM/L	5283144	C14773	CCCCC/C=C\C/C=C\CC(C(C/C=C\CCCC(=O)O)O)O	DCJBINATHQHPKO-TYAUOURKSA-N	ONLI_1146	1.79	1.54	2.75	3.03	2.67	2.98	1.85	2.93	2.62	1.57	1.36	1.71	1.98	3.33	3.08	2.3	1.22	1.5	1.85	1.7	2.16	2.05	2.87	2.22	3.35	2.95	0.98	1.67	1.36	4.58	1.86	2.42	1.57	1.56	2.02	2.38	2.64	2.85	1.49	3.59	1.38
Oxylipins	Hydroxyeicosatrienoic acids	5,6-DiHETrE	nM/L	5283142	C14772	CCCCC/C=C\C/C=C\C/C=C\CC(C(CCCC(=O)O)O)O	GFNYAPAJUNPMGH-QNEBEIHSSA-N	ONLI_1147	1.38	1.37	2.21	2.94	2.58	2.67	1.34	2.51	2.16	1.59	1.54	1.8	2.14	3.2	2.74	2.68	1.15	1.49	2.09	1.06	2.32	2.17	2.52	1.57	3.11	2.79	1.15	1.64	1.23	4.55	2.17	2.77	1.7	2.03	1.81	2.04	2.66	3.09	1.46	4.61	1.64
Oxylipins	Hydroxyeicosatetraenoic acids	17,18-DiHETE	nM/L	16061120		CCC(C(C/C=C\C/C=C\C/C=C\C/C=C\CCCC(=O)O)O)O	XYDVGNAQQFWZEF-JPURVOHMSA-N	ONLI_1148	8.91	3.9	7.23	9.46	9.51	7.42	11.73	13.54	4.55	4.98	5.37	5.01	6.31	10.8	10.4	7.51	10.02	8.12	6.56	8.19	4.27	8.96	9.62	6.01	11.6	8.21	5.84	5.67	9.05	8.28	7.21	6.17	6.17	5.64	10.42	10.23	11.43	6.02	3.2	13.57	5.2
Oxylipins	Hydroxyeicosatetraenoic acids	14,15-DiHETE	nM/L	16061119		CC/C=C\CC(C(C/C=C\C/C=C\C/C=C\CCCC(=O)O)O)O	BLWCDFIELVFRJY-QXBXTPPVSA-N	ONLI_1149	0.74		1	1.11	1.42	0.99	1.96	1.83	0.54	1.26	1.23	0.86	1.25	1.26	1.12	0.6	1.28	1.7	0.68	1.01	0.87	1.05	1.33	1.17	1.32	0.95	0.85	1	1.41	1.56	1.1	0.61	0.95	0.71	1.78	1.44	1.39	0.91	0.51	1.72	0.84
Oxylipins	Very long-chain fatty acids	19,20-DiHDPE	nM/L	16061148		CCC(C(C/C=C\C/C=C\C/C=C\C/C=C\C/C=C\CCC(=O)O)O)O	FFXKPSNQCPNORO-MBYQGORISA-N	ONLI_1150	4.36	2.2	4.33	3.74	4.51	3.24	4.19	5.06	2.16	2.68	2.4	2.74	3.17	5.32	3.31	3.06	3.48	3.67	2.81	3.47	2.03	4.62	4.64	3.47	4.1	4.04	2.45	3.38	2.97	4.03	2.78	2.13	2.89	2.46	4.47	4.66	5.65	3.27	1.68	6.44	2.1
Oxylipins	Leukotrienes	6-trans-LTB4	nM/L	5283128		CCCCC/C=C\C[C@H](/C=C/C=C/C=C/[C@H](CCCC(=O)O)O)O	VNYSSYRCGWBHLG-UKNWISKWSA-N	ONLI_1153					0.72		0.28					0.28		0.34		0.26			0.27		0.29				0.35		0.28								0.31	0.45	0.32	0.26		0.26
Oxylipins	Linoleic acids and derivatives	13S-HODE	nM/L	6443013	C14762	CCCCC[C@@H](/C=C/C=C\CCCCCCCC(=O)O)O	HNICUWMFWZBIFP-IRQZEAMPSA-N	ONLI_1156	103.96	238.12	31.15	82.89	328.25	250.22	533.41	113.32	159.5	128.26	83.22	71.48	78.43	59.01	196.6	266.1	93.84	132.03	88.67	244.74	122.71	112.72	125.19	92.4	160.68	106.07	83.27	134.54	91.3	137.73	66.75	111.13	130.33	57.92	114.27	261.54	60.72	100.33	146.7	105.3	85.04
Oxylipins	Linoleic acids and derivatives	9-HODE	nM/L	5282945		CCCCC/C=C/C=C/C(CCCCCCCC(=O)O)O	NPDSHTNEKLQQIJ-SIGMCMEVSA-N	ONLI_1157	24.21	38.26	12.41	44.74	80.44	48.62	46.76	42.24	61.7	67	33.97	40.72	40.75	22.13	60.05	183.05	56.81	44.94	44.14	83.34	43.38	37.8	67.45	50.47	74.56	28.48	42.8	31.89	52.25	32.7	27.26	71.9	70.91	46.76	24.13	30.35	31.01	57.76	58.04	31.83	52.16
Oxylipins	Linoleic acids and derivatives	13-HOTE	nM/L	10469728		CC/C=C\CC(/C=C/C=C\CCCCCCCC(=O)O)O	KLLGGGQNRTVBSU-JDTPQGGVSA-N	ONLI_1158	8.36	24.59	1.59	5.67	45.08	25.13	68.16	9.83	8.79	7.64	7.55	7.3	7.89	5.06	11.48	16.88	6.93	13.67	7.38	17.88	8.38	7.28	13.82	5.02	16.62	9.34	8.03	15.14	8.86	10.35	6.5	11.91	13.33	6.48	13.34	23.44	5.12	9.21	10.85	7.64	7.13
Oxylipins	Linoleic acids and derivatives	9-HOTE	nM/L	53480359		CC/C=C\CC/C=C/C=C(\CCCCCCCC(=O)O)/O	YUPHIKSLGBATJK-OBKPXJAFSA-N	ONLI_1159	1.15	2.16		1.71	3.81	2.91	1.19	1.37	3.92	2.54	0.96	1.74	1.86	0.79	4.07	8.13	2.71	1.81	1.87	5.01	3.13	2.55	3.2	1.96	3.53	1.83	1.57	2.44	2.09	2.6	1.02	3.65	3.74	2.58	0.98	2.14	1.11	2.67	4.35	2.04	2.71
Oxylipins	Hydroxyeicosatetraenoic acids	15-HETE	nM/L	5280724	C04742	CCCCC[C@@H](/C=C/C=C\C/C=C\C/C=C\CCCC(=O)O)O	JSFATNQSLKRBCI-VAEKSGALSA-N	ONLI_1161	2.77	4.1	2.07	3.52	8.81	4.39	12.59	6.55	3.37	1.49	4.42	1.17	1.03	2.01	4	5.51	1.07	1.08	1.02	1.45	1.37	1.53	1.61	0.94	1.43	1.34	1	1.61	0.92	1.68	1.09	0.94	1.15	0.59	1.29	3.11	0.97	1.25	0.81	1.91	1.13
Oxylipins	Hydroxyeicosatetraenoic acids	12S-HETE	nM/L	5283155	C14777	CCCCC/C=C\C[C@@H](/C=C/C=C\C/C=C\CCCC(=O)O)O	ZNHVWPKMFKADKW-LQWMCKPYSA-N	ONLI_1162	205.28	623.17	175.54	306.94	1290.21	715.45	2287.09	872.57	284.58	54.51	579.87	156.62	93.66	206.5	401.27	422.96	49.79	177.52	87.03	154.78	110.07	88.69	161.13	93.08	153.52	116.15	68.26	156.53	30.01	168.42	105.99	66.98	156.49	57.07	285.28	410.12	126.76	158.14	65.73	189.02	68.22
Oxylipins	Hydroxyeicosatetraenoic acids	8S-HETE	nM/L	5283154	C14776	CCCCC/C=C\C/C=C\C=C\[C@H](C/C=C\CCCC(=O)O)O	NLUNAYAEIJYXRB-VYOQERLCSA-N	ONLI_1163	3.26	3.35	2.6	3.23	5.35	5.05	6.7	4.5	3.57	1.58	3.21	1.36	1.36	3.17	4.49	3.2	1.44	1.24	1.62	2.41	2.17	5.53	2.27	2.23	2.23	5.33	1.47	2.61	1.12	4.93	1.64	2.17	1.33	0.99	1.49	4.93	2.24	2.61	1.88	5.31	0.92
Oxylipins	Hydroxyeicosatetraenoic acids	11-HETE	nM/L	5312981	C14780	CCCCC/C=C\C=C/[C@@H](C/C=C\C/C=C/CCCC(=O)O)O	GCZRCCHPLVMMJE-RSPKXIRXSA-N	ONLI_1164	1.34	2.09	1.76	3.2	8.69	2.27	13.14	6.33	2.19	1.04	4.73	1.15	0.98	1.62	2.01	5.98	0.62	0.76	1.06	0.78	0.61	0.84	1.52	0.84	1.4	0.85	1.05	0.73	0.62	1.08	0.92	0.89	1.14	0.6	0.91	1.56	0.92	1	0.44	0.97	1.25
Oxylipins	Hydroxyeicosatetraenoic acids	9-HETE	nM/L	5312978		CCCCC/C=C\C/C=C\CC(/C=C\C=C\CCCC(=O)O)O	KATOYYZUTNAWSA-DLJQHUEDSA-N	ONLI_1165	0.74		0.63	0.93	1.06	1.07	1	0.93		0.76	0.88	0.91	0.82	1.15	0.73	0.99		0.74	0.63		0.62	0.71	0.76	0.95	1.02	0.84	0.78	0.61	0.63	1.01	0.89	0.86	0.66		0.69	0.73	0.65	0.88		0.79	0.82
Oxylipins	Hydroxyeicosatetraenoic acids	5-HETE	nM/L	5280733	C04805	CCCCC/C=C\C/C=C\C/C=C\C=C\[C@H](CCCC(=O)O)O	KGIJOOYOSFUGPC-JGKLHWIESA-N	ONLI_1166	5.65	7.91	5.89	11.78	13.41	11.01	7.32	9.31	7.7	6.59	6.87	9.57	11.61	11.14	10.07	8.17	7.68	7.63	10.28	5.1	14.76	7.52	8.59	5.48	9.43	8.52	6.85	8.34	7.28	14.43	7.71	9.44	8.99	12.39	8.75	10.59	9.16	9.37	7.75	14.44	9.82
Oxylipins	Hydroxyeicosapentaenoic acids	15-HEPE	nM/L	53480357		CC/C=C\C(C/C=C/C=C\C/C=C\C/C=C\CCCC(=O)O)O	UDXLGBLAJBYLSZ-XBCQTNLFSA-N	ONLI_1167	0.29	0.46			1.21	0.63	1.58	0.26		0.41	0.33			0.32	0.49			0.3			0.37			0.31			0.31			0.29	0.36				0.27	0.49
Oxylipins	Hydroxyeicosapentaenoic acids	12S-HEPE	nM/L	10041593		CC/C=C\C/C=C\CC(/C=C/C=C\C/C=C\CCCC(=O)O)O	MCRJLMXYVFDXLS-QGQBRVLBSA-N	ONLI_1168	13.72	36.77	4.67	8.75	66.46	55.56	140.33	26.25	5.43	3.02	16.43	13.28	8.07	16.33	22.81	9.99	4.66	18.83	7.65	13.18	9.8	9.73	10.73	7.31	10.52	10.57	10.04	16.09	3.79	18.59	11.78	4.47	13.98	4.09	28.72	41.16	10.75	12.03	4.91	14.83	3.76
Oxylipins	Hydroxyeicosapentaenoic acids	5S-HEPE	nM/L	6439678		CC/C=C\C/C=C\C/C=C\C/C=C\C=C\C(CCCC(=O)O)O	FTAGQROYQYQRHF-FCWZHQICSA-N	ONLI_1170				0.79	0.83	1.3		0.67	0.74		0.61	0.93	0.79	1.01	1.38	0.74			1.13	0.55	1.26	0.84	0.62		0.91	0.82	0.84	0.96	0.62	1.71	0.72	1.05	0.94	0.76		0.89	0.56	0.76	0.57	1.08	1.18
Oxylipins	Very long-chain fatty acids	17-HDoHE	nM/L	6439179		CC/C=C\CC(/C=C/C=C\C/C=C\C/C=C\C/C=C\CCC(=O)O)O	SWTYBBUBEPPYCX-VIIQGJSXSA-N	ONLI_1171	9.85	10.62	3.33	2.87	9.9	13.14	21.56	6.62	1.25	4.17	4.21	0.83		4.02	6.22	1.47	1.57	2.62		2.73	1.57	2.82	1.83	1.5		1.76		2.82	0.91	3.22	1.62				2.58	9	1.02	0.65	0.76	2.2
Oxylipins	Very long-chain fatty acids	14-HDoHE	nM/L	11566378		CC/C=C\C/C=C\CC(/C=C/C=C\C/C=C\C/C=C\CCC(=O)O)O	ZNEBXONKCYFJAF-BGKMTWLOSA-N	ONLI_1172	104.36	258.3	45.99	76.51	459.24	311.79	760.63	143.1	28.34	33.77	68.04	67.06	52.2	141.72	125.31	75.17	25.9	85.07	39.13	65.68	39.71	55.73	79.3	47.07	87.65	47.57	43.84	88.39	18.95	114.52	70.86	28.94	73.41	22.6	161.48	308.6	73.13	87.7	35.54	81.89	16.36
Oxylipins	Very long-chain fatty acids	4-HDoHE	nM/L	14429109		CC/C=C\C/C=C\C/C=C\C/C=C\C/C=C\C=C\C(CCC(=O)O)O	IFRKCNPQVIJFAQ-PQVBWYSWSA-N	ONLI_1173	1.2	1.43	3.04	4.29	5.21	2	3.77	5.32	1.03	2.23	2.22	5.06	5.76	4.53	1.72	2.19	3.32	3.12	4.34	0.88	3.16	1.09	3.06	1.07	2.63	1.7	2.92	2.15	3.89	2.58	3.95	4.11	4.09	7.24	6.19	2.08	3.16	3.53	1.24	2.38	5.62
Oxylipins	Linoleic acids and derivatives	13-KODE	nM/L	6446027	C14765	CCCCCC(=O)/C=C/C=C\CCCCCCCC(=O)O	JHXAZBBVQSRKJR-BSZOFBHHSA-N	ONLI_1174	5.87	11.21			7.2	11.83	3.49		10.63						9.87	10.74				14.73	6.35	4.31	3.79			6.58		6.58		5.31						11.64			5.74	7.44
Oxylipins	Linoleic acids and derivatives	9-KODE	nM/L	9839084	C14766	CCCCC/C=C\C=C\C(=O)CCCCCCCC(=O)O	LUZSWWYKKLTDHU-ZJHFMPGASA-N	ONLI_1175	5.9	11.35	18.41	36.52	41.07	18.37	21.67	39.48	25.07	42.79	25.54	31.96	30.09	20.49	18	109.55	30.76	32.71	26.84	26.36	13.56	9.73	54.67	49.65	48.82	7.9	18.85	6.08	37.84	11.74	21.74	39.77	51.71	29.71	16.38	6.46	24.81	34.23	20	14.17	37.28
Oxylipins	Long-chain fatty acids	15-KETE	nM/L	5280701	C04577	CCCCCC(=O)/C=C/C=C\C/C=C\C/C=C\CCCC(=O)O	YGJTUEISKATQSM-USWFWKISSA-N	ONLI_1176	2.17	2.68				2.71			2.54						2.76					1.83	3.13	3.16				2.46		2.54		2.96						3			2.83	3.6
Oxylipins	Long-chain fatty acids	5-KETE	nM/L	5283159	C14732	CCCCC/C=C\C/C=C\C/C=C\C=C\C(=O)CCCC(=O)O	MEASLHGILYBXFO-XTDASVJISA-N	ONLI_1177					0.31																							0.25												0.56
Oxylipins	Linoleic acids and derivatives	9,10-EpO	nM/L	15868	C19418	CCCCCCCCC1C(O1)CCCCCCCC(=O)O	IMYZYCNQZDBZBQ-UHFFFAOYSA-N	ONLI_1178			0.56			1.84			1.37
Oxylipins	Long-chain fatty acids	1213Ep-9-KODE	nM/L	5283007		CCCCCC1C(O1)/C=C/C(=O)CCCCCCCC(=O)O	RCMABBHQYMBYKV-BUHFOSPRSA-N	ONLI_1179	1.78	5.69		3.77	9.75	5.28	13.07	1.89	15.24		2.69	2.78	2.64		17.49	4.66				2.35		11.78	2.08			8.57		3.12	1.96	11.06			2.76	1.37	2.66	18.37				15.64	1.73
Oxylipins	Long-chain fatty acids	1213-EpOME	nM/L	5356421	C14826	CCCCCC1C(O1)C/C=C\CCCCCCCC(=O)O	CCPPLLJZDQAOHD-FLIBITNWSA-N	ONLI_1180	11.15	11.99	7.59	17.8	20.32	18.43	11.67	12.29	14.29	11.77	11.05	16.31	17.33	13.62	14.9	24.24	14.61	14.25	16.85	15.07	13.32	13.3	22.79	14.51	22.58	13.44	15.25	16.33	12.88	16.87	11.61	19.02	23.9	13.6	10.85	15.44	17.85	25.65	14.6	12.99	17.04
Oxylipins	Medium-chain fatty acids	910-EpOME	nM/L	6246154	C14825	CCCCC/C=C\CC1C(O1)CCCCCCCC(=O)O	FBUKMFOXMZRGRB-YFHOEESVSA-N	ONLI_1181	3.57	4.6	2.52	8.62	8.21	6.64	2.39	4.75	6.28	4.47	3.04	4.34	4.54	3.34	8.04	10.11	3.77	4.72	5.25	6.91	6.21	5.2	6.27	4.49	7.17	5.02	4.6	4.49	4.42	8.33	3.65	8.04	7.43	4.11	1.86	5.41	3.66	7.45	6.88	6.12	6.92
Oxylipins	Long-chain fatty acids	15,16-EpODE	nM/L	16061062		CCC1C(O1)C/C=C\C/C=C\CCCCCCCC(=O)O	HKSDVVJONLXYKL-OHPMOLHNSA-N	ONLI_1182	11.25	11.33	3.91	9.88	12.65	14.18	11.71	9.49	15.1	8.96	6.29	6.36	8.21	4.78	15.6	18.97	10.44	12.16	7.89	22.69	14.7	11.67	11.19	9	16.46	16.89	8.73	12.59	15.62	16.35	9.79	15.07	15.84	9.86	11.19	18.09	11.52	14.97	17.39	15.01	8.66
Oxylipins	Long-chain fatty acids	alpha-12(13)-EpODE	nM/L	16061061		CC/C=C\CC1C(O1)C/C=C\CCCCCCCC(=O)O	BKKGUKSHPCTUGE-OOHFSOINSA-N	ONLI_1184	0.32	0.4		0.38	0.64	0.77		0.53	0.76	0.55	0.47	0.46	0.58	0.32	0.56	1.36	0.36	0.66	0.47	1.04	0.86	0.66	0.61	0.43	0.75	0.51	0.47	0.49	0.8	0.58	0.56	0.79	0.82	0.7		0.59	0.5	0.73	0.99	0.72	0.54
Oxylipins	Hepoxilins	11,12-EpETrE	nM/L	53480479	C14770	CCCCC/C=C/CC1C(O1)C/C=C\C/C=C/CCCC(=O)O	DXOYQVHGIODESM-IQCOFVSKSA-N	ONLI_1186	0.37	0.44	0.72	1.15	0.61	0.88	0.33	0.86	0.75	0.61	0.33	0.42	0.41	1.26	0.82	0.99	0.37	0.3	0.41	0.34	0.66	0.84	1.07	0.58	1.1	1.03	0.31	0.26	0.32	1.36	0.6	0.98	0.48	0.32	0.32	1.21	0.9	1.27	0.57	1.83	0.32
Oxylipins	Long-chain fatty acids	89-EpETrE	nM/L	5283203	C14769	CCCCC/C=C\C/C=C\CC1C(O1)C/C=C\CCCC(=O)O	DBWQSCSXHFNTMO-TYAUOURKSA-N	ONLI_1187	1.07	0.6	1.96	3.41	2	1.77	0.88	2.12	1.37	1.9	0.81	1.49	1.66	4.57	1.39	2.48	1.06	1.16	1.21		0.72	1.58	2.71	1.79	3.13	2.34	0.99		1.09	3.06	2.22	2.37	1.36	1	2.75	2.31	3.42	3.19	1.05	3.29	0.85
Oxylipins	Long-chain fatty acids	1718-EpETE	nM/L	16061089	C13843	CCC1C(O1)C/C=C\C/C=C\C/C=C\C/C=C\CCCC(=O)O	GPQVVJQEBXAKBJ-JPURVOHMSA-N	ONLI_1188	0.68		0.56		0.37	0.27	0.82	0.56	0.37	0.42	0.6		0.28	0.37	0.71		0.45	0.58	0.33		0.59	0.48	0.36	0.44	0.36				0.53	1.06	0.59	0.35			0.38	0.55	0.36	0.29		1.05
Oxylipins	Long-chain fatty acids	10-Nitrooleate	nM/L	24836820		CCCCCCCC/C(=C\CCCCCCCC(=O)O)/[N+](=O)[O-]	WRADPCFZZWXOTI-BMRADRMJSA-N	ONLI_1198	7.13	3.74	0.56		9.54	2.26	2.89	1.48	4.6	0.82	0.71	1.71	0.68	4.54	2.91	0.99	2.07	1.42	4.33	6.24	2.39	13.36	0.43	1.26	1.39	2.49	0.74	6.02	3.43	2.02	0.53	0.78	2.31	3.12	1.36	5.68	2.82	0.66	2.02	5.41	3.97
Oxylipins	Linoleic acids and derivatives	10-Nitrolinoleate	nM/L	5282259	C13800	CCCCC/C=C\C/C(=C\CCCCCCCC(=O)O)/[N+](=O)[O-]	LELVHAQTWXTCLY-XYWKCAQWSA-N	ONLI_1200	4.61				14.37									4.76					6.54	4.41		13.28				3.33		14.86	4.03				3.39	3.32		5.5	3.54				8.19
[truncated: 179 more columns]
