# Supplementary material for: Sexual Dimorphism of the Mouse Plasma Metabolome Is Associated with Phenotypes of 30 Gene Knockout Lines
Source: Metabolites. 2023 Aug 15;13(8):947. doi: 10.3390/metabo13080947 (PMC10456929; doi:10.3390/metabo13080947)
Supplement: Supplementary file 1 [file metabolites-13-00947-s001.zip › Supplementary Data S3_WT metabolite differences_Zhang et al_KOMP_08-2023.xlsx]

## Sheet: read_me
Sexual Dimorphism of the Mouse Plasma Metabolome Is Associated with Phenotypes of 30 Gene Knockout Lines
Ying Zhang 1,2, Dinesh K. Barupal 3, Sili Fan 1, Bei Gao 4, Chao Zhu 5, Ann M. Flenniken 6,7, Colin McKerlie 6,8, Lauryl M. J. Nutter 6,8, Kevin C. Kent Lloyd 9 and Oliver Fiehn 1,*
1	West Coast Metabolomics Center, University of California Davis, Davis, CA 95616, USA; ofiehn@ucdavis.edu (O.F.) ythzhang@ucdavis.edu (Y.Z.); slfan@ucdavis.edu (S.F.)
2	Department of Chemistry, University of California, Davis, Davis, CA 95616, USA
3	Department of Environmental Medicine and Public Health, Icahn School of Medicine at Mount Sinai, New York, NY 10029, USA; dinesh.barupal@mssm.edu
4	School of Marine Sciences, Nanjing University of Information Science and Technology,Nanjing 210044, China; wintergb2012@gmail.com
5	College of Medicine & Nursing, Dezhou University, Dezhou 253023, China; zhuchao@dzu.edu.cn
6	The Centre for Phenogenomics, Toronto, ON M5T 3H7, Canada; flenniken@lunenfeld.ca (A.M.F.); colin.mckerlie@sickkids.ca (C.M.); lauryl.nutter@sickkids.ca (L.M.J.N.)
7	Lunenfeld-Tanenbaum Research Institute, Mount Sinai Hospital, Toronto, ON M5G 1X5, Canada
8	The Hospital for Sick Children, Toronto, ON M5G 1X8, Canada
9	Department of Surgery, School of Medicine, and Mouse Biology Program, University of California, Davis, Davis, CA 95616, USA; kclloyd@ucdavis.edu
	*Correspondence: ofiehn@ucdavis.edu
Spreadsheet	Output
1_no bodyweight adjusted	Sex as a Biological Variable in Metabolomics Dataset for Wildtype Mice
2_after bw adjusted	Sex as a Biological Variable in Metabolomics Data with Bodyweight as a Confounder for Wildtype Mice
Note: fold change calculations used female mice as reference, coefficient > 0 or foldchange >1 means higher metabolite levels in male WT mice

## Sheet: 1_no bodyweight adjusted
	SI Data 3a. Sex as a Biological Variable in Metabolomics Dataset for Wildtype Mice.
long column names	label	Metbaolites	Platform	InChiKey	PubChemID	SMILES	# of female WT mice	# of male WT mice	Normality of male WT mice after data transformation	Normality of female WT mice after data transformation	p value Male vs. Female	estimate of WT Male vs. Female	foldchange WT male vs. female	adjusted p value	comment of row3
short column names	label	Metbaolites	Platform	InChiKey	PubChemID	SMILES	F_Count	M_Count	Normality_M	Normality_F	p_value	Coefficient	fold_change	adjusted_p_value
	ONLI_0001	xylulose NIST	gctof	LQXVFWRQNMEDEE-PYHARJCCSA-N	439205	C1[C@@H]([C@H](C(O1)(CO)O)O)O	20	20	0.942862	0.890923	0.854584	-0.0577916	1.00032	0.903995
	ONLI_0002	xylose	gctof	SRBFZHDQGSBBOR-IOVATXLUSA-N	135191	C1[C@H]([C@@H]([C@H](C(O1)O)O)O)O	20	20	0.994988	0.779798	0.456433	-0.234023	0.941643	0.575906
	ONLI_0003	xylitol	gctof	HEBKCHPVOIAQTA-NGQZWQHPSA-N	6912	C([C@H](C([C@H](CO)O)O)O)O	20	20	0.841637	0.894759	0.00366678	0.867046	1.20308	0.00845776
	ONLI_0005	uridine	gctof	DRTQHJPVMGBUCF-XVFCMESISA-N	6029	C1=CN(C(=O)NC1=O)[C@H]2[C@@H]([C@@H]([C@H](O2)CO)O)O	20	20	0.986966	0.99966	0.344151	0.296587	1.13732	0.465616
	ONLI_0006	uric acid	gctof	LEHOTFFKMJEONL-UHFFFAOYSA-N	1175	C12=C(NC(=O)N1)NC(=O)NC2=O	20	20	0.00144114	0.0821136	0.195287	-0.361103	0.67145	0.294394
	ONLI_0007	urea	gctof	XSQUKJJJFZCRTK-UHFFFAOYSA-N	1176	C(=O)(N)N	20	20	0.812026	0.993125	0.834941	0.0657011	1.01321	0.891415
	ONLI_0008	uracil	gctof	ISAKRJDGNUQOIC-UHFFFAOYSA-N	1174	C1=CNC(=O)NC1=O	20	20	0.975157	0.963078	0.612082	-0.159668	1.04195	0.712032
	ONLI_0009	tyrosine	gctof	OUYCCCASQSFEME-QMMMGPOBSA-N	6057	C1=CC(=CC=C1C[C@@H](C(=O)O)N)O	20	20	0.941839	0.590694	0.11109	-0.494132	0.87835	0.184289
	ONLI_0011	trans-4-hydroxyproline	gctof	PMMYEEVYMWASQN-DMTCNVIQSA-N	5810	C1[C@H](CN[C@@H]1C(=O)O)O	20	20	0.624214	0.594175	0.0834512	-0.535214	0.852932	0.142629
	ONLI_0012	thymine	gctof	RWQNBRDOKXIBIV-UHFFFAOYSA-N	1135	CC1=CNC(=O)NC1=O	20	19	0.273645	0.835338	0.00177751	-0.907324	0.759018	0.00447155
	ONLI_0014	threonine	gctof	AYFVYJQAPQTCCC-GBXIJSLDSA-N	6288	C[C@H]([C@@H](C(=O)O)N)O	20	20	0.988429	0.96878	0.0256823	-0.680897	0.81516	0.0496978
	ONLI_0015	threonic acid	gctof	LYEIRXNHQIDPMW-GUBZILKMSA-NÂ Â	497572	CC(=O)N[C@@H](CCC(=O)O)C(=O)N[C@@H](CCC(=O)O)C(=O)N[C@@H](CS)C(=O)O	20	20	0.724342	0.784577	0.38629	0.271889	1.0736	0.507533
	ONLI_0017	sulfuric acid	gctof	QAOWNCQODCNURD-UHFFFAOYSA-N	1118	OS(=O)(=O)O	20	20	0.999595	0.998767	0.50501	-0.209634	0.782609	0.619715
	ONLI_0018	sucrose	gctof	CZMRCDWAGMRECN-UGDNZRGBSA-N	5988	C([C@@H]1[C@H]([C@@H]([C@H]([C@H](O1)O[C@]2([C@H]([C@@H]([C@H](O2)CO)O)O)CO)O)O)O)O	19	20	0.86303	0.99995	0.692879	0.119317	1.35805	0.780095
	ONLI_0019	succinic acid	gctof	KDYFGRWQOYBRFD-UHFFFAOYSA-N	1110	C(CC(=O)O)C(=O)O	20	20	0.984564	0.992308	0.0551185	0.590358	1.22641	0.0968786
	ONLI_0020	stearic acid	gctof	QIQXTHQIDYTFRH-UHFFFAOYSA-N	5281	CCCCCCCCCCCCCCCCCC(=O)O	20	20	0.191152	0.335949	0.255649	0.355456	1.04679	0.368812
	ONLI_0022	saccharic acid	gctof	DSLZVSRJTYRBFB-LLEIAEIESA-N	33037	[C@H]([C@@H]([C@@H](C(=O)O)O)O)([C@H](C(=O)O)O)O	20	20	0.958293	0.849275	0.116237	0.487368	1.24507	0.191352
	ONLI_0023	ribose	gctof	HMFHBZSHGGEWLO-SOOFDHNKSA-N	5779	C([C@@H]1[C@H]([C@H](C(O1)O)O)O)O	19	20	0.829934	0.94707	0.552275	-0.179336	1.14433	0.65864
	ONLI_0024	ribonic acid	gctof	QXKAIJAYHKCRRA-BXXZVTAOSA-N	5460677	C([C@H]([C@H]([C@H](C(=O)O)O)O)O)O	20	20	0.967037	0.996853	0.340671	-0.298714	0.911939	0.463244
	ONLI_0025	ribitol	gctof	HEBKCHPVOIAQTA-QWWZWVQMSA-N	94154	C([C@H](C([C@@H](CO)O)O)O)O	20	20	0.717484	0.980903	0.750197	0.100329	1.03523	0.823013
	ONLI_0026	raffinose	gctof	MUPFEKGTMRGPLJ-BQCSWRFHSA-N	10542	C([C@@H]1[C@@H]([C@@H]([C@H](C(O1)OC[C@@H]2[C@H]([C@@H]([C@H](C(O2)O[C@]3([C@H]([C@@H]([C@H](O3)CO)O)O)CO)O)O)O)O)O)O)O	20	20	0.927491	0.934216	0.72172	0.111647	1.0441	0.803574
	ONLI_0027	pyruvic acid	gctof	LCTONWCANYUPML-UHFFFAOYSA-N	1060	CC(=O)C(=O)O	20	20	0.988602	0.913099	0.176411	0.421236	1.43078	0.26947
	ONLI_0028	pseudo uridine	gctof	PTJWIQPHWPFNBW-GBNDHIKLSA-N	15047	C1=C(C(=O)NC(=O)N1)[C@H]2[C@@H]([C@@H]([C@H](O2)CO)O)O	20	20	0.890787	0.673909	0.405718	-0.261036	0.915971	0.524371
	ONLI_0030	pinitol	gctof	DSCFFEYYQKSRSV-FEPQRWDDSA-N	164619	COC1[C@@H]([C@H](C([C@@H]([C@@H]1O)O)O)O)O	20	20	0.861464	0.629199	0.329554	-0.305579	0.880714	0.450409
	ONLI_0031	pimelic acid	gctof	WLJVNTCWHIRURA-UHFFFAOYSA-N	385	C(CCC(=O)O)CCC(=O)O	20	20	0.772472	0.981206	0.985148	0.00587091	1.00419	0.987602
	ONLI_0032	phosphate	gctof	NBIIXXVUZAFLBC-UHFFFAOYSA-N	1004	OP(=O)(O)O	19	20	0.517989	0.755767	0.136471	-0.454669	0.664473	0.217975
	ONLI_0033	phenylethylamine	gctof	BHHGXPLMPWCGHP-UHFFFAOYSA-N	1001	C1=CC=C(C=C1)CCN	20	20	0.806182	0.995363	0.276048	-0.340844	0.702306	0.389857
	ONLI_0034	phenylalanine	gctof	COLNVLDHVKWLRT-QMMMGPOBSA-N	6140	C1=CC=C(C=C1)C[C@@H](C(=O)O)N	20	20	0.683387	0.549047	0.463415	-0.230436	0.955057	0.582889
	ONLI_0035	phenol	gctof	ISWSIDIOOBJBQZ-UHFFFAOYSA-N	996	C1=CC=C(C=C1)O	20	20	0.660022	0.913967	0.89988	0.0396777	1.03133	0.937132
	ONLI_0036	pelargonic acid	gctof	FBUKVWPVBMHYJY-UHFFFAOYSA-N	8158	CCCCCCCCC(=O)O	20	20	0.956336	0.699973	0.504314	0.209974	1.03998	0.619715
	ONLI_0039	palmitic acid	gctof	IPCSVZSSVZVIGE-UHFFFAOYSA-N	985	CCCCCCCCCCCCCCCC(=O)O	20	20	0.996181	0.977664	0.492735	0.215677	1.0292	0.611174
	ONLI_0040	oxoproline	gctof	ODHCTXKNWHHXJC-VKHMYHEASA-N	7405	C1CC(=O)N[C@@H]1C(=O)O	20	20	0.997488	0.989193	0.607385	-0.161771	0.972718	0.707591
	ONLI_0041	oxalic acid	gctof	MUBZPKHOEPUJKR-UHFFFAOYSA-N	971	C(=O)(C(=O)O)O	20	19	2.69e-07	1.15e-05	0.318595	-0.217671	0.409506	0.438409
	ONLI_0042	ornithine	gctof	AHLPHDHHMVZTML-BYPYZUCNSA-N	6262	C(C[C@@H](C(=O)O)N)CN	20	20	0.524382	0.384027	0.161873	-0.43548	0.858324	0.251559
	ONLI_0044	octadecanol	gctof	GLDOVTGHNKAZLK-UHFFFAOYSA-N	8221	CCCCCCCCCCCCCCCCCCO	20	19	0.696143	0.465648	0.976436	-0.0089336	0.770409	0.981312
	ONLI_0045	myristic acid	gctof	TUNFSRHWOTWDNC-UHFFFAOYSA-N	11005	CCCCCCCCCCCCCC(=O)O	20	20	0.908057	0.972934	0.355433	0.289789	1.0481	0.477669
	ONLI_0046	myo-inositol	gctof	CDAISMWEOUEBRE-UHFFFAOYSA-N	892	C1(C(C(C(C(C1O)O)O)O)O)O	19	20	0.818644	0.999046	0.860024	0.0533264	1.06962	0.906322
	ONLI_0047	methionine sulfoxide	gctof	QEFRNWWLZKMPFJ-UHFFFAOYSA-N	847	CS(=O)CCC(C(=O)O)N	20	20	0.977104	0.992168	0.141481	-0.457118	0.828896	0.22464
	ONLI_0048	methionine	gctof	FFEARJCKVFRZRR-BYPYZUCNSA-N	6137	CSCC[C@@H](C(=O)O)N	20	19	0.86873	0.591367	0.890635	-0.0415838	0.96745	0.92991
	ONLI_0049	mannose	gctof	WQZGKKKJIJFFOK-QTVWNMPRSA-N	18950	C([C@@H]1[C@H]([C@@H]([C@@H](C(O1)O)O)O)O)O	20	20	0.875743	0.759427	0.719219	0.11329	1.0466	0.801899
	ONLI_0050	maltose	gctof	GUBGYTABKSRVRQ-DKBJLJRDSA-N	10991489	C([C@@H]1[C@H]([C@@H]([C@H]([C@H](O1)O[C@@H]2[C@H](O[C@@H]([C@H]([C@H]2O)O)O)CO)O)O)O)O	20	20	0.946078	0.970387	0.0127419	0.754172	1.39968	0.0263006
	ONLI_0051	malic acid	gctof	BJEPYKJPYRNKOW-UHFFFAOYSA-N	525	C(C(C(=O)O)O)C(=O)O	20	20	0.956435	0.966892	0.215039	0.387052	1.28814	0.318211
	ONLI_0052	lyxose	gctof	AEMOLEFTQBMNLQ-DTEWXJGMSA-N	441476	[C@@H]1([C@H]([C@H](O[C@H]([C@@H]1O)O)C(=O)O)O)O	20	20	0.950224	0.925848	0.127251	-0.473622	0.657966	0.205697
	ONLI_0053	lyxitol	gctof	HEBKCHPVOIAQTA-IMJSIDKUSA-N	439255	C([C@@H](C([C@H](CO)O)O)O)O	20	20	0.888631	0.946011	0.621912	-0.155286	0.973418	0.721382
	ONLI_0054	lysine	gctof	KDXKERNSBIXSRK-YFKPBYRVSA-N	5962	C(CCN)C[C@@H](C(=O)O)N	20	20	0.850972	0.945972	0.00251016	-0.897883	0.68464	0.00603188
	ONLI_0057	lauric acid	gctof	POULHZVOKOAJMA-UHFFFAOYSA-N	3893	CCCCCCCCCCCC(=O)O	19	20	0.86306	0.632302	0.927923	0.0273587	1.01557	0.951118
	ONLI_0058	lactic acid	gctof	JVTAAEKCZFNVCJ-UWTATZPHSA-N	61503	C[C@H](C(=O)O)O	20	20	0.322905	0.714694	0.0514816	0.59899	1.24972	0.0910828
	ONLI_0059	lactamide	gctof	SXQFCVDSOLSHOQ-UHFFFAOYSA-N	94220	CC(C(=O)N)O	20	20	0.982213	0.974721	0.312988	0.31608	1.14816	0.433658
	ONLI_0060	isothreonic acid	gctof	JPIJQSOTBSSVTP-GBXIJSLDSA-N	151152	C([C@H]([C@@H](C(=O)O)O)O)O	20	19	0.999938	1	5.52e-05	1.12275	1.32211	0.000193048
	ONLI_0061	isoleucine	gctof	AGPKZVBTJJNPAG-WHFBIAKZSA-N	6306	CC[C@H](C)[C@@H](C(=O)O)N	20	20	0.888006	0.814939	0.0118763	-0.761094	0.850846	0.0248969
	ONLI_0062	isohexonic acid	gctof	RGHNJXZEOKUKBD-SQOUGZDYSA-N	10690	C([C@H]([C@H]([C@@H]([C@H](C(=O)O)O)O)O)O)O	20	20	0.88614	0.804277	0.0529909	0.59535	1.25289	0.0935476
	ONLI_0063	isocitric acid	gctof	ODBLHEXUDAPZAU-UHFFFAOYSA-N	1198	C(C(C(C(=O)O)O)C(=O)O)C(=O)O	20	20	0.998376	0.999793	0.709052	-0.117576	0.956025	0.793115
	ONLI_0064	inosine	gctof	UGQMRVRMYYASKQ-KQYNXXCUSA-N	135398641	C1=NC2=C(C(=O)N1)N=CN2[C@H]3[C@@H]([C@@H]([C@H](O3)CO)O)O	20	20	0.336168	0.686397	0.0109857	0.76859	1.29758	0.0233003
	ONLI_0065	indoxyl sulfate	gctof	BXFFHSIDQOFMLE-UHFFFAOYSA-N	10258	C1=CC=C2C(=C1)C(=CN2)OS(=O)(=O)O	20	20	0.975668	0.930348	0.0105408	-0.772665	0.594223	0.0225076
	ONLI_0066	indole-3-propionic acid	gctof	GOLXRNDWAUTYKT-UHFFFAOYSA-N	3744	C1=CC=C2C(=C1)C(=CN2)CCC(=O)O	20	20	0.989321	0.796998	0.108111	-0.498155	0.772134	0.181101
	ONLI_0067	indole-3-lactate	gctof	XGILAAMKEQUXLS-UHFFFAOYSA-N	92904	C1=CC=C2C(=C1)C(=CN2)CC(C(=O)O)O	19	19	0.432786	0.996389	1.21e-05	-1.18399	0.664255	4.79e-05
	ONLI_0068	indole-3-acetate	gctof	SEOVTRFCIGRIMH-UHFFFAOYSA-N	802	C1=CC=C2C(=C1)C(=CN2)CC(=O)O	20	20	0.999965	0.998433	4.6e-06	-1.26436	0.59477	2.04e-05
	ONLI_0069	hydroxylamine	gctof	AVXURJPOCDRRFD-UHFFFAOYSA-N	787	NO	20	20	0.983815	0.94721	0.405706	-0.261042	0.937634	0.524371
	ONLI_0070	hydroxycarbamate NIST	gctof	DRAJWRKLRBNJRQ-UHFFFAOYSA-N	16639161	C(=O)(NO)O	20	20	0.990789	0.9928	0.633618	-0.150106	0.938883	0.732317
	ONLI_0071	hydrocinnamic acid	gctof	XMIIGOLPHOKFCH-UHFFFAOYSA-N	107	C1=CC=C(C=C1)CCC(=O)O	20	20	0.9873	0.779715	0.113781	0.490567	1.28455	0.188077
	ONLI_0072	hippuric acid	gctof	QIAFMBKCNZACKA-UHFFFAOYSA-N	464	C1=CC=C(C=C1)C(=O)NCC(=O)O	20	20	0.522314	0.810285	0.525052	0.199913	1.17541	0.637507
	ONLI_0073	hexuronic acid	gctof	IAJILQKETJEXLJ-RSJOWCBRSA-N	84740	C(=O)[C@@H]([C@H]([C@H]([C@@H](C(=O)O)O)O)O)O	19	20	0.21587	0.401939	0.515381	0.196178	1.19749	0.627657
	ONLI_0074	hexose	gctof	WQZGKKKJIJFFOK-PHYPRBDBSA-N	439357	C([C@@H]1[C@@H]([C@@H]([C@H]([C@H](O1)O)O)O)O)O	20	20	0.952025	0.993635	0.180102	0.417742	1.12614	0.274068
	ONLI_0075	hexitol	gctof	FBPFZTCFMRRESA-GUCUJZIJSA-N	11850	C([C@H]([C@@H]([C@@H]([C@H](CO)O)O)O)O)O	20	20	0.994961	0.999993	0.221607	-0.38169	0.870477	0.325535
	ONLI_0076	hexadecane	gctof	DCAYPVUWAIABOU-UHFFFAOYSA-N	11006	CCCCCCCCCCCCCCCC	20	20	0.820759	0.988641	0.606082	-0.162321	0.914437	0.707095
	ONLI_0078	glycolic acid	gctof	AEMRFAOFKBGASW-UHFFFAOYSA-N	757	C(C(=O)O)O	20	20	0.993897	0.777302	0.55958	-0.183609	0.962412	0.665379
	ONLI_0079	glycine	gctof	DHMQDGOQFOQNFH-UHFFFAOYSA-N	750	C(C(=O)O)N	20	20	0.965454	0.960232	0.0329947	0.65257	1.1056	0.0619131
	ONLI_0080	glycerol-alpha-phosphate	gctof	AWUCVROLDVIAJX-GSVOUGTGSA-N	439162	C([C@H](COP(=O)(O)O)O)O	20	20	0.997185	0.999808	0.146832	0.451231	1.15805	0.231764
	ONLI_0081	glycerol-3-galactoside	gctof	NHJUPBDCSOGIKX-VGPGGAHRSA-N	656504	C([C@@H]1[C@@H]([C@@H]([C@H]([C@@H](O1)OCC(CO)O)O)O)O)O	20	20	0.880405	0.934027	0.55864	0.184046	1.01439	0.665245
	ONLI_0082	glycerol	gctof	PEDCQBHIVMGVHV-UHFFFAOYSA-N	753	C(C(CO)O)O	20	20	0.792818	0.891067	0.260628	-0.351821	0.921173	0.374652
	ONLI_0083	glyceric acid	gctof	RBNPOMFGQQGHHO-UWTATZPHSA-N	439194	C([C@H](C(=O)O)O)O	20	20	0.998127	0.930014	0.77009	-0.0921259	0.982181	0.838107
	ONLI_0086	glucose-1-phosphate	gctof	HXXFSFRBOHSIMQ-GASJEMHNSA-N	439165	C([C@@H]1[C@H]([C@@H]([C@H](C(O1)OP(=O)(O)O)O)O)O)O	20	20	0.366424	0.752763	0.231347	0.37392	1.09095	0.337993
	ONLI_0087	glucose	gctof	WQZGKKKJIJFFOK-VFUOTHLCSA-N	64689	C([C@@H]1[C@H]([C@@H]([C@H]([C@@H](O1)O)O)O)O)O	20	20	0.942402	0.978613	0.164963	0.432378	1.17045	0.255867
	ONLI_0088	fumaric acid	gctof	VZCYOOQTPOCHFL-OWOJBTEDSA-N	444972	C(=C/C(=O)O)\C(=O)O	20	20	0.996823	0.995467	0.687681	0.126657	1.07908	0.776414
	ONLI_0089	fucose	gctof	SHZGCJCMOBCMKK-FPRJBGLDSA-N	439650	C[C@@H]1[C@@H]([C@@H]([C@H]([C@@H](O1)O)O)O)O	20	20	0.778797	0.880964	0.860161	0.0555512	1.02434	0.906322
	ONLI_0090	fructose	gctof	RFSUNEUAIZKAJO-ARQDHWQXSA-N	439709	C([C@@H]1[C@H]([C@@H]([C@](O1)(CO)O)O)O)O	20	20	0.0638333	0.508742	0.179223	-0.396737	0.773125	0.273247
	ONLI_0091	ethanolamine	gctof	HZAXFHJVJLSVMW-UHFFFAOYSA-N	700	C(CO)N	20	20	0.835101	0.763086	0.507511	-0.208411	0.967416	0.621435
	ONLI_0092	erythritol	gctof	UNXHWFMMPAWVPI-QWWZWVQMSA-N	169019	C([C@H]([C@@H](CO)O)O)O	20	20	0.999791	0.995039	7.44e-06	1.24331	1.51602	3.09e-05
	ONLI_0093	dodecanol	gctof	LQZZUXJYWNFBMV-UHFFFAOYSA-N	8193	CCCCCCCCCCCCO	20	20	0.999885	0.99613	0.230672	-0.374441	0.908487	0.337619
	ONLI_0094	D-erythro-sphingosine	gctof	WWUZIQQURGPMPG-KRWOKUGFSA-N	5280335	CCCCCCCCCCCCC/C=C/[C@H]([C@H](CO)N)O	20	20	0.939421	0.99811	0.962815	-0.0147044	0.941916	0.973701
	ONLI_0095	cystine	gctof	LEVWYRKDKASIDU-IMJSIDKUSA-N	67678	C([C@@H](C(=O)O)N)SSC[C@@H](C(=O)O)N	19	20	0.391987	0.735061	0.800818	-0.0762662	1.06474	0.862996
	ONLI_0096	cysteine	gctof	XUJNEKJLAYXESH-REOHCLBHSA-N	5862	C([C@@H](C(=O)O)N)S	20	20	0.94666	0.955833	0.807794	0.0766985	1.12457	0.86819
	ONLI_0098	conduritol-beta-epoxide	gctof	ZHMWOVGZCINIHW-SPHYCDKFSA-N	9989541	[C@@H]1([C@@H]([C@H](C2C([C@@H]1O)O2)O)O)O	20	20	0.663005	0.870996	0.624625	-0.154082	0.927701	0.723487
	ONLI_0100	citric acid	gctof	KRKNYBCHXYNGOX-UHFFFAOYSA-N	311	C(C(=O)O)C(CC(=O)O)(C(=O)O)O	20	20	0.995409	0.999726	0.713997	-0.115489	0.962144	0.797181
	ONLI_0101	catechol	gctof	YCIMNLLNPGFGHC-UHFFFAOYSA-N	289	C1=CC=C(C(=C1)O)O	20	20	0.999976	0.994683	0.412665	-0.257228	0.890037	0.528973
	ONLI_0102	caprylic acid	gctof	WWZKQHOCKIZLMA-UHFFFAOYSA-N	379	CCCCCCCC(=O)O	20	20	0.997945	0.972495	0.72875	-0.10929	0.978612	0.808049
	ONLI_0103	capric acid	gctof	GHVNFZFCNZKVNT-UHFFFAOYSA-N	2969	CCCCCCCCCC(=O)O	20	20	0.450827	0.663907	0.382106	0.274248	1.10779	0.504255
	ONLI_0104	beta-alanine	gctof	UCMIRNVEIXFBKS-UHFFFAOYSA-N	239	C(CN)C(=O)O	20	19	0.550268	0.506868	0.363412	0.273353	1.07624	0.483724
	ONLI_0105	benzoic acid	gctof	WPYMKLBDIGXBTP-UHFFFAOYSA-N	243	C1=CC=C(C=C1)C(=O)O	20	19	0.999961	0.667531	0.108554	-0.476918	0.690192	0.181299
	ONLI_0109	aminomalonate	gctof	JINBYESILADKFW-UHFFFAOYSA-N	100714	C(C(=O)O)(C(=O)O)N	20	20	0.312206	0.970906	0.820615	-0.069755	2.74718	0.879621
	ONLI_0110	alpha-ketoglutarate	gctof	KPGXRSRHYNQIFN-UHFFFAOYSA-N	51	C(CC(=O)O)C(=O)C(=O)O	20	20	0.994028	0.913784	0.123617	0.478043	1.2839	0.20144
	ONLI_0111	alpha-aminoadipic acid	gctof	OYIFNHCXNCRBQI-UHFFFAOYSA-N	469	C(CC(C(=O)O)N)CC(=O)O	19	20	0.286883	0.72276	0.317594	0.300217	1.15411	0.437779
	ONLI_0113	alanine	gctof	QNAYBMKLOCPYGJ-REOHCLBHSA-N	5950	C[C@@H](C(=O)O)N	20	20	0.957357	0.857842	0.487035	0.218509	1.05337	0.605971
	ONLI_0114	adenosine	gctof	OIRDTQYFTABQOQ-KQYNXXCUSA-N	60961	C1=NC(=C2C(=N1)N(C=N2)[C@H]3[C@@H]([C@@H]([C@H](O3)CO)O)O)N	20	20	0.986021	0.811514	0.165635	0.431696	3.68877	0.256076
	ONLI_0115	6-deoxyglucitol	gctof	SKCKOFZKJLZSFA-JGWLITMVSA-N	151266	C[C@H]([C@H]([C@@H]([C@H](CO)O)O)O)O	20	20	0.530353	0.513234	0.928669	-0.0282306	1.00161	0.951118
	ONLI_0116	5-methoxytryptamine	gctof	JTEJPPKMYBDEMY-UHFFFAOYSA-N	1833	COC1=CC2=C(C=C1)NC=C2CCN	20	20	0.961448	0.86075	0.1401	-0.458632	0.481303	0.223328
	ONLI_0117	4-hydroxybutyric acid	gctof	SJZRECIVHVDYJC-UHFFFAOYSA-N	10413	C(CC(=O)O)CO	20	20	0.970732	0.961647	0.537932	-0.193779	0.940142	0.648256
	ONLI_0118	3-hydroxypropionic acid	gctof	ALRHLSYJTWAHJZ-UHFFFAOYSA-N	68152	C(CO)C(=O)O	20	20	0.999243	0.969364	0.909271	0.0359395	1.03116	0.938798
	ONLI_0119	3-hydroxybutyric acid	gctof	WHBMMWSBFZVSSR-GSVOUGTGSA-N	92135	C[C@H](CC(=O)O)O	20	20	0.86495	0.617848	0.0119139	-0.760784	0.630745	0.0249109
	ONLI_0120	3-aminoisobutyric acid	gctof	QCHPKSFMDHPSNR-UHFFFAOYSA-N	64956	CC(CN)C(=O)O	19	20	0.63381	0.926691	0.287854	0.318971	1.13073	0.404402
	ONLI_0121	3,6-anhydro-D-galactose	gctof	WZYRMLAWNVOIEX-BGPJRJDNSA-N	16069996	C1[C@H]([C@@H]([C@H](O1)[C@H](C=O)O)O)O	20	20	0.925852	0.779569	0.342231	-0.297678	0.976769	0.46458
	ONLI_0122	3-3-hydroxyphenylpropionic acid	gctof	QVWAEZJXDYOKEH-UHFFFAOYSA-N	91	C1=CC(=CC(=C1)O)CCC(=O)O	19	20	0.788082	0.993776	0.0253917	-0.653586	0.532224	0.0493727
	ONLI_0123	2-ketoisocaproic acid	gctof	BKAJNAXTPSGJCU-UHFFFAOYSA-N	70	CC(C)CC(=O)C(=O)O	20	20	0.894548	0.541612	0.449525	-0.237601	0.923785	0.570769
	ONLI_0124	2-hydroxyglutaric acid	gctof	HWXBTNAVRSUOJR-VKHMYHEASA-N	439939	C(CC(=O)O)[C@@H](C(=O)O)O	20	20	0.752047	0.782369	0.484796	0.219495	1.06531	0.605055
	ONLI_0125	2-hydroxybutanoic acid	gctof	AFENDNXGAFYKQO-UHFFFAOYSA-N	11266	CCC(C(=O)O)O	20	20	0.596823	0.311851	0.477802	-0.223134	0.119795	0.598182
	ONLI_0126	2-deoxytetronic acid	gctof	DZAIOXUZHHTJKN-UHFFFAOYSA-N	150929	C(C(CO)O)C(=O)O	20	20	0.999761	0.983304	0.4597	0.232334	1.0257	0.579121
	ONLI_0127	2-aminobutyric acid	gctof	QWCKQJZIFLGMSD-VKHMYHEASA-N	80283	CC[C@@H](C(=O)O)N	20	20	0.985784	0.995777	0.00323781	-0.877349	0.724309	0.00757685
	ONLI_0128	1,3,5-trimethylcyanuric acid	gctof	AHWDQDMGFXRVFB-UHFFFAOYSA-N	13225	CN1C(=O)N(C(=O)N(C1=O)C)C	20	20	0.934452	0.977567	0.320314	0.311394	1.0374	0.440022
	ONLI_0155	SM d38:1	CSHPOS	AADLTHQNYQJHQV-SVLGDMRNSA-N	44260124	CCCCCCCCCCCCCCCCCCCC(=O)N[C@@H](COP(=O)([O-])OCC[N+](C)(C)C)[C@@H](/C=C/CCCCCCCCCCCCC)O	20	20	0.995115	0.990552	8.72e-05	1.12058	1.27576	0.000281764
	ONLI_0156	TAG 56:10; TAG 18:2-18:3-20:5;	CSHPOS	CEGFLXYMGPCHEY-MOSCTQMVSA-N	131763301	CCCCC/C=C\C/C=C\CCCCCCCC(=O)OC[C@@H](COC(=O)CCC/C=C\C/C=C\C/C=C\C/C=C\C/C=C\CC)OC(=O)CCCC/C=C\C/C=C\C/C=C\CCCCC	20	20	0.751215	0.909271	0.108211	0.498019	1.17675	0.181101
	ONLI_0157	TAG 58:7; TAG 18:1-18:1-22:5;	CSHPOS	AANCKINPVVQDGX-OSUITXOZSA-N	131760076	CCCCCC/C=C\CCCCCCCCCC(=O)OC[C@@H](COC(=O)CCCCC/C=C\C/C=C\C/C=C\C/C=C\C/C=C\CC)OC(=O)CCCCCCCCC/C=C\CCCCCC	20	20	0.999835	0.991319	4.68e-05	1.1542	2.06528	0.000168861
	ONLI_0158	AC 14:1	CSHPOS	ABVVZYXTZLEOHP-OLHLWXQYSA-N	90659872	CCCC/C=C\CCCCCCCC(=O)O[C@H](CC(=O)[O-])C[N+](C)(C)C	20	20	0.976905	0.656311	0.203387	-0.396882	0.751511	0.30546
	ONLI_0159	TAG 54:7; TAG 18:2-18:2-18:3;	CSHPOS	NGPHUAVENUDDAO-GZNXBNPNSA-N	100977823	CCCCC/C=C\C/C=C\CCCCCCCC(=O)OC[C@@H](COC(=O)CCCCCCC/C=C\C/C=C\C/C=C\CC)OC(=O)CCCCCCC/C=C\C/C=C\CCCCC	19	20	0.653017	0.910208	0.0452534	0.589332	1.71095	0.0813147
	ONLI_0160	PC(22:6(4Z,7Z,10Z,13Z,16Z,19Z)/18:0)	CSHPOS	AHWXJDWBIIDPKS-TZUVPVEASA-N	52923691	CCCCCCCCCCCCCCCCCC(=O)O[C@H](COC(=O)CC/C=C\C/C=C\C/C=C\C/C=C\C/C=C\C/C=C\CC)COP(=O)([O-])OCC[N+](C)(C)C	20	20	0.999552	0.99965	8.62e-06	1.23665	1.51153	3.54e-05
	ONLI_0161	DAG 36:2; DAG 18:0-18:2;	CSHPOS	AJMZUFBKADIAKC-SKTOPKGQSA-N	6441562	CCCCCCCCCCCCCCCCCC(=O)OC[C@H](CO)OC(=O)CCCCCCC/C=C\C/C=C\CCCCC	20	20	0.996754	0.679516	0.000509962	1.0134	1.52028	0.00142048
	ONLI_0162	TAG 55:2; TAG 17:0-18:1-20:1;	CSHPOS	AKDAPWJIGQLALK-XSUIJCOHSA-N	134718461	CCCCCCCCCCCCCCCCC(=O)OC[C@H](COC(=O)CCCCCCCCC/C=C/CCCCCCCC)OC(=O)CCCCCCCCC/C=C/CCCCCC	20	20	0.999999	0.996899	2.19e-05	1.19267	2.65943	8.36e-05
	ONLI_0163	9-HODE cholesteryl ester	CSHPOS	ALWABJCAEDQEGO-SGAXLBQASA-N	71684431	CCCCC/C=C\C=C\C(CCCCCCCC(=O)O[C@H]1CC[C@@]2([C@H]3CC[C@]4([C@H]([C@@H]3CC=C2C1)CC[C@@H]4[C@H](C)CCCC(C)C)C)C)O	20	20	0.770292	0.00975458	0.273695	0.322148	1.30497	0.387214
	ONLI_0164	PE38:4	CSHPOS	ANRKEHNWXKCXDB-BHFWLYLHSA-N	46891781	CCCCCCCCCCCCCCCCCC(=O)OC[C@H](COP(=O)([O-])OCC[NH3+])OC(=O)CCC/C=C\C/C=C\C/C=C\C/C=C\CCCCC	20	20	0.410589	0.741763	8.53e-10	1.53676	1.68475	1.25e-08
	ONLI_0165	SM d42:4; SM d14:2/28:2;	CSHPOS	APVVIKGWDUMMAY-VIVRHXLSSA-N	138120868	CCCCCCCCCCC/C=C\C/C=C\CCCCCCCCCCCC(=O)NC(COP(=O)([O-])OCC[N+](C)(C)C)C(/C=C/CC/C=C/CCCCC)O	20	20	0.961879	0.998904	0.00202443	-0.914739	0.855606	0.00496849
	ONLI_0167	PC 38:4; PC 18:0-20:4;	CSHPOS	HAKKEJDMTIQLJH-UGKDIXSWSA-N	53478701	CCCCCCCCCCCCCCCCCC(=O)OC[C@H](COP(=O)([O-])OCC[N+](C)(C)C)OC(=O)CCCCCC/C=C\C/C=C\C/C=C\C/C=C\CC	20	20	0.647624	0.693519	0.00405774	-0.858582	0.827193	0.00922735
	ONLI_0168	PC36:1	CSHPOS	ATHVAWFAEPLPPQ-VRDBWYNSSA-N	24778825	CCCCCCCCCCCCCCCCCC(=O)OC[C@H](COP(=O)([O-])OCC[N+](C)(C)C)OC(=O)CCCCCCC/C=C\CCCCCCCC	20	20	0.997513	0.937837	4.36e-07	1.35685	1.62984	2.44e-06
	ONLI_0169	TAG 53:5; TAG 17:1-18:2-18:2;	CSHPOS	0	NA	0	20	20	0.992176	0.943386	1.64e-05	1.20663	1.96453	6.39e-05
	ONLI_0170	PC35:3	CSHPOS	AYXGHIQPMDYMJC-AHMBLZLYSA-N	52924614	CCCCCCCCCCCCCCCCCC(=O)O[C@H](COC(=O)CCCCCC/C=C\C/C=C\C/C=C\CCCCC)COP(=O)(O)OCCN	20	20	0.260802	0.260802	2.77e-10	1.56185	2.11297	6.19e-09
	ONLI_0171	TAG 49:0; TAG 15:0-16:0-18:0;	CSHPOS	AYHAGPSMXXZJSI-VCZQVZGSSA-N	131754177	CCCCCCCCCCCCCCCCCCOC[C@H](COC(=O)CCCCCCCCCCCCCC)OC(=O)CCCCCCCCCCCCCCC	19	20	0.604343	0.877129	0.0172453	0.69315	1.62067	0.0345336
	ONLI_0172	LPE 18:0	CSHPOS	BBYWOYAFBUOUFP-JOCHJYFZSA-N	9547068	CCCCCCCCCCCCCCCCCC(=O)OC[C@H](COP(=O)(O)OCCN)O	19	19	0.980608	0.943022	0.0126707	-0.707312	0.898742	0.0262224
	ONLI_0173	TAG 53:1; TAG 17:0-18:0-18:1;	CSHPOS	BHJLNGDWUXQOBH-QOCHGBHMSA-N	138126516	CCCCCCCCCCCCCCCCCC(=O)OC(COC(=O)CCCCCCCCCCCCCCCC)COC(=O)CCCCCCCCC/C=C\CCCCCC	20	20	0.968004	0.362499	0.000759076	0.969005	2.17466	0.00203685
	ONLI_0175	TAG 60:13; TAG 18:2-20:5-22:6;	CSHPOS	GKGVYCDLFAHWTQ-MYJMWWOYSA-N	131763450	CCCCC/C=C\C/C=C\CCCCCCCC(=O)OC[C@@H](COC(=O)CC/C=C\C/C=C\C/C=C\C/C=C\C/C=C\C/C=C\CC)OC(=O)CCC/C=C\C/C=C\C/C=C\C/C=C\C/C=C\CC	20	20	0.980437	0.984052	0.0836953	-0.534808	0.773551	0.142743
	ONLI_0176	TAG 47:0; TAG 15:0-16:0-16:0;	CSHPOS	BLIGKERFCBUUQF-MFERNQICSA-N	131754153	CCCCCCCCCCCCCCCC(=O)OC[C@H](COC(=O)CCCCCCCCCCCCCC)OC(=O)CCCCCCCCCCCCCCC	20	20	0.687745	0.616275	0.0231061	0.692488	1.2849	0.0452565
	ONLI_0177	DAG 36:3; DAG 18:1-18:2;	CSHPOS	BLZVZPYMHLXLHG-JOBMVARSSA-N	9543722	CCCCCCCC/C=C\CCCCCCCC(=O)OC[C@H](CO)OC(=O)CCCCCCC/C=C\C/C=C\CCCCC	20	20	0.809293	0.613163	5.39e-05	1.14675	1.53563	0.000190164
	ONLI_0178	PC38:7	CSHPOS	BNNUJTATKJXKJP-XCDHYEIISA-N	53479075	CCCCC/C=C\C/C=C\C/C=C\CCCCC(=O)O[C@H](COC(=O)CCCCCC/C=C\C/C=C\C/C=C\C/C=C\CC)COP(=O)([O-])OCC[N+](C)(C)C	20	20	0.998111	0.554806	3.82e-06	1.27232	2.49766	1.72e-05
	ONLI_0179	PC40:7 A	CSHPOS	BPUROMFCPFGBOT-ZEGPSQTJSA-N	24778982	CCCCC/C=C\C/C=C\CCCCCCCC(=O)OC[C@H](COP(=O)([O-])OCC[N+](C)(C)C)OC(=O)CC/C=C\C/C=C\C/C=C\C/C=C\C/C=C\CCCCC	20	20	0.963226	0.635251	2.99e-05	1.17719	1.56538	0.000111511
	ONLI_0180	PC 39:7; PC 17:1-22:6;	CSHPOS	BWMGYQAIDPQZGJ-VKOPMEPESA-N	52922579	CCCCCCC/C=C\CCCCCCCC(=O)OC[C@H](COP(=O)([O-])OCC[N+](C)(C)C)OC(=O)CC/C=C\C/C=C\C/C=C\C/C=C\C/C=C\C/C=C\CC	20	19	0.999993	0.893954	2.6e-07	1.37076	1.67108	1.53e-06
	ONLI_0181	PC36:3 A	CSHPOS	BXRLDROZWDUSGM-ZRYFCQOPSA-N	24778937	CCCCCCCC/C=C\CCCCCCCC(=O)OC[C@H](COP(=O)([O-])OCC[N+](C)(C)C)OC(=O)CCCC/C=C\C/C=C\CCCCCCCC	20	20	0.980367	0.531518	1.36e-08	1.4665	1.70304	1.07e-07
	ONLI_0182	TAG 56:0; TAG 16:0-18:0-22:0;	CSHPOS	CAPRXGZRZWSDGE-UWGNJQTFSA-N	131755012	CCCCCCCCCCCCCCCCCCCCCC(=O)OC[C@H](COC(=O)CCCCCCCCCCCCCCC)OC(=O)CCCCCCCCCCCCCCCCC	20	20	0.877772	0.991	0.394146	0.267463	1.14511	0.513411
	ONLI_0183	TAG 52:7; TAG 16:1-18:2-18:4;	CSHPOS	CMQKNURFVKDTED-HQIPLBRRSA-N	131759572	CCCCCC/C=C\CCCCCCCC(=O)OC[C@@H](COC(=O)CCCC/C=C\C/C=C\C/C=C\C/C=C\CC)OC(=O)CCCCCCC/C=C\C/C=C\CCCCC	20	20	0.999551	0.835766	1.83e-06	1.30267	2.14924	8.81e-06
	ONLI_0184	TAG 58:10; TAG 16:1-20:4-22:5;	CSHPOS	FARJXFHQIBPRRK-MCQDRIRZSA-N	131759657	CCCCCC/C=C\CCCCCCCC(=O)OC[C@@H](COC(=O)CC/C=C\C/C=C\C/C=C\C/C=C\C/C=C\CCCCC)OC(=O)CCC/C=C\C/C=C\C/C=C\C/C=C\CCCCC	20	20	0.731737	0.727824	0.447369	-0.238724	0.922406	0.568929
	ONLI_0185	PCo-44:5	CSHPOS	CEZAZXUWDFPTTE-FHIJIHMSSA-N	53481767	CCCCC/C=C\C/C=C\CCCCCCCCCCCCOC[C@H](COP(=O)([O-])OCC[N+](C)(C)C)OC(=O)CCCCCCCC/C=C\C/C=C\C/C=C\CCCCC	20	20	0.646694	0.721084	0.32847	0.296733	1.09284	0.449691
	ONLI_0186	PEo-36:3	CSHPOS	CFANDHZPOSNKNO-UDHSZFGOSA-N	53480897	CCCCCCCC/C=C\CCCCCCCC(=O)O[C@H](CO/C=C\CCCCCC/C=C\CCCCCCCC)COP(=O)(O)OCCN	20	19	0.997641	0.944328	5.48e-07	1.35157	1.41724	3.02e-06
	ONLI_0187	TAG 60:2; TAG 18:1-20:1-22:0;	CSHPOS	CFOWRVBCJCEHTO-NYLLBKPFSA-N	131757450	CCCCCCCCCCCCCCCCCCCCCC(=O)OC[C@@H](COC(=O)CCCCCCCCC/C=C\CCCCCC)OC(=O)CCCCCCCCC/C=C\CCCCCCCC	20	20	0.48674	0.446599	0.00878254	0.785845	1.86705	0.0189543
	ONLI_0188	Zymosterol	CSHPOS	CGSJXLIKVBJVRY-XTGBIJOFSA-N	92746	C[C@H](CCC=C(C)C)[C@H]1CC[C@@H]2[C@@]1(CCC3=C2CC[C@@H]4[C@@]3(CC[C@@H](C4)O)C)C	20	20	0.848911	0.771838	0.56116	-0.182874	0.995327	0.666275
	ONLI_0189	TAG 54:3; TAG 16:0-18:0-20:3;	CSHPOS	CICXNKCKBFXJSH-LZWIKYMTSA-N	131755017	CCCCCCCCCCCCCCCCCC(=O)O[C@@H](COC(=O)CCCCCCCCCCCCCCC)COC(=O)CCC/C=C\C/C=C\C/C=C\CCCCCCCC	20	20	0.935764	0.83791	0.00650225	0.81755	1.25621	0.0142237
	ONLI_0190	TAG 56:4; TAG 18:0-18:0-20:4;	CSHPOS	CIRJQIDEADRSMG-ZYKWSEAGSA-N	131750364	CCCCCCCCCCCCCCCCCC(=O)OC[C@@H](COC(=O)CCC/C=C\C/C=C\C/C=C\C/C=C\CCCCC)OC(=O)CCCCCCCCCCCCCCCCC	20	20	0.997954	0.36027	1.28e-07	1.39865	2.21939	8.07e-07
	ONLI_0191	TAG 54:1; TAG 18:0-18:0-18:1;	CSHPOS	CXVKBFLPGNGMQW-NAWMRHBJSA-N	131750547	CCCCCCCCCCCCCCCCCC(=O)OC[C@@H](COC(=O)CCCCCCCCC/C=C\CCCCCC)OC(=O)CCCCCCCCCCCCCCCCC	20	20	0.998505	0.999986	2.01e-07	1.38379	4.03387	1.2e-06
	ONLI_0192	TAG 51:3; TAG 15:0-18:1-18:2;	CSHPOS	CYSYJKJDVJLYTD-KDHVXLOFSA-N	138140505	CCCCCCCCCCCCCCC(=O)OCC(COC(=O)CCCCCCCC/C=C\C=C/CCCCC)OC(=O)CCCCCCCCC/C=C\CCCCCC	20	20	0.965123	0.994155	3.2e-05	1.17382	2.22562	0.00011811
	ONLI_0193	SMd42:2	CSHPOS	DACOGJMBYLZYDH-GXJPFUDISA-N	52931217	CCCCCCCCCCCCCCCCCCCCCCCC(=O)N[C@@H](COP(=O)([O-])OCC[N+](C)(C)C)[C@@H](/C=C/CCCCCCCC/C=C\CCC)O	20	20	0.999365	0.951153	0.687471	-0.126746	0.987282	0.776414
	ONLI_0194	LPE18:2	CSHPOS	DBHKHNGBVGWQJE-USWSLJGRSA-N	52925130	CCCCC/C=C\C/C=C\CCCCCCCC(=O)OC[C@H](COP(=O)(O)OCCN)O	20	20	0.977815	0.982715	0.393859	0.267624	1.10026	0.513411
	ONLI_0195	TAG 54:0; TAG 16:0-18:0-20:0;	CSHPOS	FPBBGJFVHOTVDS-GNFJTHHVSA-N	131755693	CCCCCCCCCCCCCCCCCCCC(=O)OC[C@H](COC(=O)CCCCCCCCCCCCCCC)OCCCCCCCCCCCCCCCCCC	19	20	0.597881	0.991842	0.724848	-0.106373	0.954585	0.805857
	ONLI_0196	PCo-36:3	CSHPOS	DIHWZUCEXWUHOD-IIVNATNGSA-N	53480801	CCCCCCCC/C=C\CCCCCCCC(=O)O[C@H](CO/C=C\CCCCCC/C=C\CCCCCCCC)COP(=O)([O-])OCC[N+](C)(C)C	20	20	0.708054	0.988324	4.92e-08	1.42893	1.46302	3.43e-07
	ONLI_0197	TAG 48:3; TAG 12:0-18:1-18:2;	CSHPOS	DILVDBIGCVMQJQ-HQZFYGAOSA-N	138143748	CCCCCCCCCCCC(=O)OCC(COC(=O)CCCCCCCC/C=C\C=C/CCCCC)OC(=O)CCCCCCCCC/C=C\CCCCCC	20	20	0.999975	0.884568	1.17e-05	1.22255	3.12082	4.67e-05
	ONLI_0198	TAG 56:7; TAG 16:0-18:1-22:6;	CSHPOS	DNTWVXNMAFTXDU-RVFBAGKZSA-N	131755186	CCCCCCCCCCCCCCCC(=O)OC[C@@H](COC(=O)CC/C=C\C/C=C\C/C=C\C/C=C\C/C=C\C/C=C\CC)OC(=O)CCCCCCCCC/C=C\CCCCCC	20	20	0.974093	0.908621	0.0176463	0.721147	1.38976	0.035206
	ONLI_0199	TAG 48:3; TAG 14:0-16:0-18:3;	CSHPOS	ROOGPSPBLOJPPQ-MMNSDLEGSA-N	131753281	CCCCCCCCCCCCCCCC(=O)O[C@@H](COC(=O)CCCCCCCCCCCCC)COC(=O)CCCC/C=C\C/C=C\C/C=C\CCCCC	20	20	0.998654	0.531491	5.98e-06	1.25297	3.08028	2.54e-05
	ONLI_0200	TAG 50:3; TAG 16:0-16:1-18:2;	CSHPOS	HDFLQJUGWGNORO-NSVHLBAISA-N	131750350	CCCCCCCCCCCCCCCC(=O)OC[C@@H](COC(=O)CCCCCCC/C=C\C/C=C\CCCCC)OC(=O)CCCCCCC/C=C\CCCCCC	20	20	0.998715	0.583266	3.47e-06	1.27637	3.19341	1.59e-05
	ONLI_0201	TAG 50:0; TAG 16:0-16:0-18:0;	CSHPOS	DQKMNCLZNGAXNX-DPDRHGIRSA-N	99649112	CCCCCCCCCCCCCCCCCC(=O)OC[C@H](COC(=O)CCCCCCCCCCCCCCC)OC(=O)CCCCCCCCCCCCCCC	20	20	0.742392	0.759266	0.3008	-0.324032	0.878765	0.418935
	ONLI_0202	PE 16:0-20:4	CSHPOS	DRIVXEVMDWCWLI-CAQMIEAISA-N	9546800	CCCCCCCCCCCCCCCC(=O)OC[C@H](COP(=O)(O)OCCN)OC(=O)CCC/C=C\C/C=C\C/C=C\C/C=C\CCCCC	20	20	0.260802	0.260802	2.77e-10	1.56185	2.7014	6.19e-09
	ONLI_0203	PC42:6	CSHPOS	DSVRMAGYENFTLY-GDDYDVMSSA-N	52923651	CCCCC/C=C\C/C=C\CCCCCCCCCC(=O)O[C@H](COC(=O)CCCCC/C=C\C/C=C\C/C=C\C/C=C\CCCCC)COP(=O)([O-])OCC[N+](C)(C)C	20	20	0.260802	0.260802	2.77e-10	1.56185	10.2159	6.19e-09
	ONLI_0205	TAG 56:3; TAG 18:1-18:1-20:1;	CSHPOS	QXMHHXQBBKDSSL-QGDSHWIZSA-N	131750410	CCCCCCCC/C=C\CCCCCCCCCC(=O)OC[C@H](COC(=O)CCCCCCC/C=C\CCCCCCCC)OC(=O)CCCCCCC/C=C\CCCCCCCC	20	20	0.953473	0.992492	1.08e-08	1.47277	4.39306	8.7e-08
	ONLI_0206	TAG 52:5; TAG 16:0-18:2-18:3;	CSHPOS	PWAOXOJAJJJACV-MSFNIHOKSA-N	131755325	CCCCCCCCCCCCCCCC(=O)OC[C@@H](COC(=O)CCCC/C=C\C/C=C\C/C=C\CCCCC)OC(=O)CCCCCCC/C=C\C/C=C\CCCCC	20	20	0.909715	0.971233	0.00273595	0.891007	1.84823	0.00653543
	ONLI_0207	PC(18:0/22:6(4Z,7Z,10Z,13Z,16Z,19Z)	CSHPOS	FAUYAENFVCNTAL-PFFNLMTBSA-N	24778876	CCCCCCCCCCCCCCCCCC(=O)OC[C@H](COP(=O)([O-])OCC[N+](C)(C)C)OC(=O)CC/C=C\C/C=C\C/C=C\C/C=C\C/C=C\C/C=C\CC	20	20	0.814477	0.917867	0.173046	-0.424456	0.870131	0.266351
	ONLI_0208	TAG 46:2; TAG 12:0-16:0-18:2;	CSHPOS	0	NA	0	20	20	0.991953	0.999406	3.31e-05	1.17201	2.59496	0.000121817
	ONLI_0209	TAG 51:1; TAG 16:0-17:0-18:1;	CSHPOS	RHDRMOUSDQDVCE-IWRJKWNLSA-N	9544019	CCCCCCCCCCCCCCCCC(=O)O[C@H](COC(=O)CCCCCCCCCCCCCCC)COC(=O)CCCCCCC/C=C\CCCCCCCC	20	20	0.996623	0.997856	0.00623034	0.821375	1.6787	0.0137033
	ONLI_0210	TAG 52:5; TAG 16:0-16:1-20:4;	CSHPOS	BURBQZUNMNAKMA-RAKRAUFVSA-N	131750351	CCCCCCCCCCCCCCCC(=O)OC[C@@H](COC(=O)CCC/C=C\C/C=C\C/C=C\C/C=C\CCCCC)OC(=O)CCCCCCC/C=C\CCCCCC	20	20	0.998964	0.979123	0.000827022	0.980515	1.39829	0.00218773
	ONLI_0211	PC 38:5e; PC 18:1e/20:4; [M+H]+	CSHPOS	FHHVIBPVBBRLOR-IYACIECVSA-N	24779390	CCCCCCCCCCCCCCCC/C=C\OC[C@H](COP(=O)([O-])OCC[N+](C)(C)C)OC(=O)CCC/C=C\C/C=C\C/C=C\C/C=C\CCCCC	20	20	0.997861	0.998535	0.000842847	-0.979191	0.850251	0.00221729
	ONLI_0212	TAG 56:2; TAG 16:0-18:1-22:1;	CSHPOS	JBTULCCTZFQLPM-JSPVYFJMSA-N	131755171	CCCCCCCCCCCCCCCC(=O)OC[C@@H](COC(=O)CCCCCCCCCCC/C=C\CCCCCCCC)OC(=O)CCCCCCCCC/C=C\CCCCCC	19	20	0.450653	0.982209	8.11e-09	1.49254	4.49031	7.11e-08
	ONLI_0213	PC40:4	CSHPOS	FHUAYOMRHXZKHT-JUGJLYODSA-N	53479183	CCCCCCCC/C=C\CCCCCCCCCCCC(=O)OC[C@H](COP(=O)([O-])OCC[N+](C)(C)C)OC(=O)CCCCCCC/C=C\C/C=C\C/C=C\CC	20	20	0.943847	0.989756	0.043424	0.620021	1.16606	0.0783773
	ONLI_0214	PE 40:7e; PE 18:1e/22:6;	CSHPOS	FIJFPUAJUDAZEY-MNDXXDKYSA-N	42607458	CCCCCCCCCCCCCCCC/C=C\OC[C@H](COP(=O)(O)OCCN)OC(=O)CC/C=C\C/C=C\C/C=C\C/C=C\C/C=C\C/C=C\CC	20	20	0.997871	0.954821	0.216422	0.385923	1.0494	0.319669
	ONLI_0215	SMd40:1	CSHPOS	FJJANLYCZUNFSE-TWKUQIQBSA-N	44260125	CCCCCCCCCCCCCCCCCCCCCC(=O)N[C@@H](COP(=O)([O-])OCC[N+](C)(C)C)[C@@H](/C=C/CCCCCCCCCCCCC)O	20	20	0.260802	0.260802	2.77e-10	1.56185	2.5909	6.19e-09
	ONLI_0217	TAG 50:4; TAG 14:0-16:0-20:4;	CSHPOS	FKJNKIIHHYXTFQ-SUNRTHERSA-N	131753284	CCCCCCCCCCCCCCCC(=O)O[C@@H](COC(=O)CCCCCCCCCCCCC)COC(=O)CCC/C=C\C/C=C\C/C=C\C/C=C\CCCCC	20	20	0.999978	0.861221	3.84e-06	1.2721	2.24387	1.72e-05
	ONLI_0218	SMd40:2 A	CSHPOS	FOULCGVQZYQEQM-DNXGLLHMSA-O	52931202	CCCCCCCCCCC/C=C/[C@H]([C@H](COP(=O)(O)OCC[N+](C)(C)C)NC(=O)CCCCCCCCCCCCC/C=C\CCCCCCCC)O	20	20	0.260802	0.260802	2.77e-10	1.56185	3.1712	6.19e-09
	ONLI_0220	PC 36:4; PC 18:2-18:2;	CSHPOS	FVXDQWZBHIXIEJ-LNDKUQBDSA-N	5288075	CCCCC/C=C\C/C=C\CCCCCCCC(=O)OC[C@H](COP(=O)([O-])OCC[N+](C)(C)C)OC(=O)CCCCCCC/C=C\C/C=C\CCCCC	20	20	0.967507	0.503353	4.64e-06	1.26402	2.01152	2.04e-05
	ONLI_0221	DAG 34:2; DAG 16:1-18:1;	CSHPOS	FWWLDEIJAPIBES-DATDAJMQSA-N	9543694	CCCCCCCC/C=C\CCCCCCCC(=O)O[C@@H](CO)COC(=O)CCCCCCC/C=C\CCCCCC	20	20	0.999995	0.967359	9.4e-07	1.32854	1.59266	4.85e-06
	ONLI_0222	CE (18:3)	CSHPOS	FYMCIBHUFSIWCE-KNWYFNKZSA-N	131801659	CC/C=C\C/C=C\C/C=C\CCCCCCCC(=O)O[C@H]1CC[C@@]2(C3CC[C@]4(C(C3CC=C2C1)CCC4[C@H](C)CCCC(C)C)C)C	20	20	0.983689	0.950984	5.37e-05	1.14689	1.65487	0.000190164
	ONLI_0223	TAG 49:4; TAG 15:2-16:0-18:2;	CSHPOS	0	NA	0	20	20	1	9.13e-06	1e-07	1.26899	6.1315	6.47e-07
	ONLI_0224	PC16:0/9:0COOH	CSHPOS	GHQQYDSARXURNG-SSEXGKCCSA-N	46907870	CCCCCCCCCCCCCCCC(=O)OC[C@H](COP(=O)([O-])OCC[N+](C)(C)C)OC(=O)CCCCCCCC(=O)O	20	20	0.569687	0.704925	0.161492	0.435865	1.32902	0.251453
	ONLI_0225	PE 36:3; PE 18:1-18:2;	CSHPOS	GKAFCSRKMWFPSJ-RJXNKANHSA-N	9546753	CCCCCCCC/C=C\CCCCCCCC(=O)OC[C@H](COP(=O)(O)OCCN)OC(=O)CCCCCCC/C=C\C/C=C\CCCCC	20	20	0.497908	0.410042	4.89e-10	1.54938	2.71043	8.95e-09
	ONLI_0226	TAG 50:5; TAG 14:0-18:2-18:3;	CSHPOS	BVZCCLFFAYZNFZ-QLFKCXFRSA-N	131753671	CCCCCCCCCCCCCC(=O)OC[C@@H](COC(=O)CCCCCCC/C=C\C/C=C\C/C=C\CC)OC(=O)CCCCCCC/C=C\C/C=C\CCCCC	20	20	0.997048	0.999946	5.76e-06	1.25465	2.22249	2.48e-05
	ONLI_0227	LPC 20:4	CSHPOS	GOMVPVRDBLLHQC-VEJNOCSESA-N	53480469	CC/C=C\C/C=C\C/C=C\C/C=C\CCCCCCC(=O)OC[C@H](COP(=O)([O-])OCC[N+](C)(C)C)O	19	20	0.959373	0.972	7.38e-07	-1.33386	0.69679	3.91e-06
	ONLI_0228	PC32:2	CSHPOS	GPWHCUUIQMGELX-VHQDNGOZSA-N	24778764	CCCCCC/C=C\CCCCCCCC(=O)OC[C@H](COP(=O)([O-])OCC[N+](C)(C)C)OC(=O)CCCCCCC/C=C\CCCCCC	20	20	0.956488	0.92804	1.06e-08	1.47341	1.95194	8.59e-08
	ONLI_0229	PCo-38:4 A	CSHPOS	GWBOVQHRCURSPU-QMFAPAEZSA-N	53480815	CCCCCCCC/C=C\CCCCCC/C=C\OC[C@H](COP(=O)([O-])OCC[N+](C)(C)C)OC(=O)CCCCCCCCC/C=C\C/C=C\CCCCC	20	19	0.918833	0.31951	0.156108	0.423125	1.0565	0.244013
	ONLI_0230	LPC 22:4	CSHPOS	ZOJBSSVHFSBHMP-JJJSWPRASA-N	52924039	CCCCC/C=C\C/C=C\C/C=C\C/C=C\CCCCCC(=O)OC[C@H](COP(=O)([O-])OCC[N+](C)(C)C)O	20	20	0.65877	0.79491	0.133576	0.466125	1.13093	0.213775
	ONLI_0231	PE34:2	CSHPOS	HBZNVZIRJWODIB-NHCUFCNUSA-N	9546747	CCCCCCCCCCCCCCCC(=O)OC[C@H](COP(=O)(O)OCCN)OC(=O)CCCCCCC/C=C\C/C=C\CCCCC	20	20	0.681976	0.559054	8.49e-10	1.53686	2.90421	1.25e-08
	ONLI_0232	TAG 52:6; TAG 16:0-16:1-20:5;	CSHPOS	CCDSJNBGVOSHIH-OFLVPTCNSA-N	131755156	CCCCCCCCCCCCCCCC(=O)OC[C@@H](COC(=O)CCC/C=C\C/C=C\C/C=C\C/C=C\C/C=C\CC)OC(=O)CCCCCCC/C=C\CCCCCC	20	20	0.999922	0.951211	5.99e-06	1.25294	2.1487	2.54e-05
	ONLI_0233	TAG 58:10; TAG 18:2-18:2-22:6;	CSHPOS	YNVHIDISXOPRLL-VOUXIQFDSA-N	131750599	CCCCC/C=C\C/C=C\CCCCCCCC(=O)OC[C@@H](COC(=O)CC/C=C\C/C=C\C/C=C\C/C=C\C/C=C\C/C=C\CC)OC(=O)CCCCCCC/C=C\C/C=C\CCCCC	20	20	0.997812	0.901966	0.496219	-0.213954	0.92694	0.613604
	ONLI_0234	AC 18:1	CSHPOS	HITOYGLMAFIRNI-YSESTWPTSA-N	53477830	CCCCCC/C=C/CCCCCCCCCC(=O)O[C@@H](CCC(=O)[O-])[N+](C)(C)C	20	20	0.828258	0.752071	0.41079	-0.258252	0.822608	0.528252
	ONLI_0235	TAG 56:4; TAG 18:1-18:2-20:1;	CSHPOS	YONCDTJKIZDSKQ-UVIGLXQBSA-N	131750415	CCCCCCCC/C=C\CCCCCCCCCC(=O)OC[C@H](COC(=O)CCCCCCC/C=C\CCCCCCCC)OC(=O)CCCCCCC/C=C\C/C=C\CCCCC	20	20	0.999999	0.988716	1.02e-06	1.32558	3.00537	5.18e-06
	ONLI_0236	CE (16:1)	CSHPOS	HODJWNWCVNUPAQ-XDOSKZMUSA-N	13828666	CCCCCC/C=C\CCCCCCCC(=O)O[C@H]1CC[C@@]2([C@H]3CC[C@]4([C@H]([C@@H]3CC=C2C1)CC[C@@H]4[C@H](C)CCCC(C)C)C)C	20	20	0.999653	0.938362	0.000137476	1.09469	2.37168	0.000422398
	ONLI_0237	TAG 60:11; TAG 18:1-20:4-22:6;	CSHPOS	HSALVDSITWQZNS-FENZPOJDSA-N	131760287	CCCCCC/C=C\CCCCCCCCCC(=O)OC[C@@H](COC(=O)CC/C=C\C/C=C\C/C=C\C/C=C\C/C=C\C/C=C\CC)OC(=O)CCC/C=C\C/C=C\C/C=C\C/C=C\CCCCC	20	20	0.876081	0.929261	0.0136758	-0.747138	0.84735	0.0280128
	ONLI_0238	TAG 46:3; TAG 12:0-16:1-18:2;	CSHPOS	0	NA	0	20	20	0.993549	0.0785351	0.000126413	1.06535	2.40712	0.000392906
	ONLI_0239	TAG 58:1; TAG 18:0-18:1-22:0;	CSHPOS	HTEKPEUBHXJJTE-VIQUSSKHSA-N	131755932	CCCCCCCCCCCCCCCCCCCCCC(=O)OC[C@H](COC(=O)CCCCCCCCCCCCCCCCC)OC(=O)CCCCCCCCC/C=C\CCCCCC	20	20	0.820012	0.472	0.00186017	0.910844	2.22819	0.00465042
	ONLI_0240	LPC p-16:0	CSHPOS	HTZINLFNXLXRBC-CQLBIITFSA-N	10917802	CCCCCCCCCCCCCC/C=C\OC[C@H](COP(=O)([O-])OCC[N+](C)(C)C)O	20	20	0.987877	0.982883	0.671985	-0.13339	0.99109	0.76561
	ONLI_0241	TAG 48:2; TAG 14:0-16:0-18:2;	CSHPOS	YUIIXXZIUIOJQY-RGFFXGESSA-N	131753280	CCCCCCCCCCCCCCCC(=O)O[C@@H](COC(=O)CCCCCCCCCCCCC)COC(=O)CCCCCCC/C=C\C/C=C\CCCCC	20	20	0.996537	0.63865	2.02e-05	1.19658	3.65376	7.79e-05
	ONLI_0243	Cholesterol	CSHPOS	HVYWMOMLDIMFJA-DPAQBDIFSA-N	5997	C[C@H](CCCC(C)C)[C@H]1CC[C@@H]2[C@@]1(CC[C@H]3[C@H]2CC=C4[C@@]3(CC[C@@H](C4)O)C)C	20	20	0.999964	0.999609	0.000753808	0.986955	1.0739	0.00202948
	ONLI_0244	TAG 54:2; TAG 18:0-18:1-18:1;	CSHPOS	RYNHWWNZNIGDAQ-WNMJAFDRSA-N	42627601	CCCCCCCCCCCCCCCCCC(=O)OC[C@@H](COC(=O)CCCCCCC/C=C\CCCCCCCC)OC(=O)CCCCCCC/C=C\CCCCCCCC	20	20	0.866626	0.775987	0.000301518	1.04729	2.65542	0.000889091
	ONLI_0245	TAG 50:3; TAG 16:0-16:0-18:3;	CSHPOS	WLFXGZDFDKIDIL-MXPUMGEASA-N	131750534	CCCCCCCCCCCCCCCC(=O)OC[C@@H](COC(=O)CCCCCCC/C=C\C/C=C\C/C=C\CC)OC(=O)CCCCCCCCCCCCCCC	20	20	0.998201	0.641141	3.67e-06	1.274	1.98137	1.67e-05
	ONLI_0246	TAG 54:4; TAG 16:0-18:0-20:4;	CSHPOS	IBSUTTNKAUSOHR-WPQPACDXSA-N	131750342	CCCCCCCCCCCCCCCCCC(=O)O[C@@H](COC(=O)CCCCCCCCCCCCCCC)COC(=O)CCC/C=C\C/C=C\C/C=C\C/C=C\CCCCC	20	20	0.996833	0.981729	0.119519	0.483173	1.12	0.195953
	ONLI_0247	Cer-NS d35:1; Cer-NS d18:1/17:0;	CSHPOS	ICWGMOFDULMCFL-QKSCFGQVSA-N	44584335	CCCCCCCCCCCCCCCCC(=O)N[C@@H](CO)[C@@H](/C=C/CCCCCCCCCCCCC)O	20	19	0.934576	0.970122	0.0112995	0.751962	1.06131	0.0238744
	ONLI_0249	PC 16:0-22:6	CSHPOS	IESVDEZGAHUQJU-ZLBXKVHBSA-N	6441886	CCCCCCCCCCCCCCCC(=O)OC[C@H](COP(=O)([O-])OCC[N+](C)(C)C)OC(=O)CC/C=C\C/C=C\C/C=C\C/C=C\C/C=C\C/C=C\CC	20	20	1	0.948193	1.35e-06	1.31462	1.43351	6.75e-06
	ONLI_0250	TAG 48:4; TAG 12:0-18:1-18:3;	CSHPOS	0	NA	0	20	20	0.999661	0.838385	2.69e-05	1.1826	2.37231	0.000100582
	ONLI_0251	PC40:5 A	CSHPOS	IJTJDJOOHZVSAC-NDRUHXFFSA-N	53479083	CCCCCCCC/C=C\CCCCCCCCCC(=O)O[C@H](COC(=O)CCCCCC/C=C\C/C=C\C/C=C\C/C=C\CC)COP(=O)([O-])OCC[N+](C)(C)C	20	20	0.93076	0.735587	3.13e-09	1.50534	1.94007	3.19e-08
	ONLI_0252	CE (20:4)	CSHPOS	IMXSFYNMSOULQS-BEDFLICRSA-N	6479222	CCCCC/C=C\C/C=C\C/C=C\C/C=C\CCCC(=O)O[C@H]1CC[C@@]2([C@H]3CC[C@]4([C@H]([C@@H]3CC=C2C1)CC[C@@H]4[C@H](C)CCCC(C)C)C)C	20	20	0.859723	0.635324	0.580301	-0.174045	0.999073	0.68196
	ONLI_0254	TAG 50:4; TAG 14:0-18:2-18:2;	CSHPOS	UVOGHPPAYFAQIT-AVIDDATOSA-N	131753663	CCCCCCCCCCCCCC(=O)OC[C@@H](COC(=O)CCCCCCC/C=C\C/C=C\CCCCC)OC(=O)CCCCCCC/C=C\C/C=C\CCCCC	20	20	0.996253	0.861678	8.85e-06	1.23549	2.42756	3.62e-05
	ONLI_0255	TAG 56:6; TAG 18:0-18:2-20:4;	CSHPOS	CKEOSPBKHRUVTN-WDVRSESKSA-N	131750374	CCCCCCCCCCCCCCCCCC(=O)OC[C@@H](COC(=O)CCC/C=C\C/C=C\C/C=C\C/C=C\CCCCC)OC(=O)CCCCCCC/C=C\C/C=C\CCCCC	20	20	0.975304	0.833593	0.0020169	0.915027	1.46627	0.00496849
	ONLI_0256	TAG 58:4; TAG 18:1-18:2-22:1;	CSHPOS	ODZGUPAQUQGEKA-MJECLYFESA-N	131760188	CCCCCCCC/C=C\CCCCCCCCCCCC(=O)OC[C@H](COC(=O)CCCCCCCCC/C=C\CCCCCC)OC(=O)CCCCCCC/C=C\C/C=C\CCCCC	19	20	0.66097	0.744427	6.48e-09	1.48811	4.50421	5.79e-08
	ONLI_0257	CE ( 22:4)	CSHPOS	ITGTXSFLBABXQA-BMURBKCOSA-N	16061341	CCCCC/C=C\C/C=C\C/C=C\C/C=C\CCCCCC(=O)O[C@H]1CC[C@@]2([C@H]3CC[C@]4([C@H]([C@@H]3CC=C2C1)CC[C@@H]4[C@H](C)CCCC(C)C)C)C	20	20	0.99519	0.857248	0.674442	0.132332	1.51245	0.76561
	ONLI_0258	SMd41:2 A	CSHPOS	JBDGKEXQKCCQFK-JWQIMADESA-N	52931209	CCCCCCCCCCCCCCCCCCCCCCC(=O)N[C@@H](COP(=O)([O-])OCC[N+](C)(C)C)[C@@H](/C=C/CCCCCCCC/C=C\CCC)O	20	20	0.968121	0.970986	7.69e-05	1.12752	1.26112	0.000253611
	ONLI_0259	TAG 53:3; TAG 17:0-18:1-18:2;	CSHPOS	JCUUGUUICZELJG-KDHVXLOFSA-N	138183776	CCCCCCCCCCCCCCCCC(=O)OCC(COC(=O)CCCCCCCC/C=C\C=C/CCCCC)OC(=O)CCCCCCCCC/C=C\CCCCCC	20	20	0.966088	0.999014	0.000328599	1.04187	1.91265	0.000961899
	ONLI_0260	TAG 60:3; TAG 18:2-20:1-22:0;	CSHPOS	LEZBCWXJJZZACU-NYUYSZTLSA-N	25240389	CCCCCCCCCCCCCCCCCCCCCC(=O)OC[C@@H](COC(=O)CCCCCCC/C=C\C/C=C\CCCCC)OC(=O)CCCCCCCCC/C=C\CCCCCCCC	20	20	0.894046	0.225539	0.00943812	0.769337	1.98071	0.0203147
	ONLI_0261	TAG 58:6; TAG 18:1-20:1-20:4;	CSHPOS	GSNFRUMSEHHPSY-ZGZATPIUSA-N	131750413	CCCCCCCC/C=C\CCCCCCCCCC(=O)O[C@@H](COC(=O)CCCCCCC/C=C\CCCCCCCC)COC(=O)CCC/C=C\C/C=C\C/C=C\C/C=C\CCCCC	20	20	0.984734	0.98483	0.000454537	1.02098	1.93402	0.00129294
	ONLI_0262	TAG 55:3; TAG 15:0-19:0-21:3;	CSHPOS	0	NA	0	20	20	1	0.874196	1.25e-06	1.31769	2.42066	6.28e-06
	ONLI_0263	PC34:2	CSHPOS	JLPULHDHAOZNQI-ZTIMHPMXSA-N	5287971	CCCCCCCCCCCCCCCC(=O)OC[C@H](COP(=O)([O-])OCC[N+](C)(C)C)OC(=O)CCCCCCC/C=C\C/C=C\CCCCC	20	20	0.819413	0.945226	1.04e-08	1.47392	1.5116	8.58e-08
	ONLI_0264	TAG 60:12; TAG 18:2-20:4-22:6;	CSHPOS	LVEQOBLTSBRKGQ-WVQHRUTQSA-N	131763347	CCCCC/C=C\C/C=C\CCCCCCCC(=O)OC[C@@H](COC(=O)CC/C=C\C/C=C\C/C=C\C/C=C\C/C=C\C/C=C\CC)OC(=O)CCC/C=C\C/C=C\C/C=C\C/C=C\CCCCC	20	20	0.902969	0.713955	0.0267222	-0.676491	0.772268	0.0514625
	ONLI_0265	LPE20:4	CSHPOS	ROPRRXYVXLDXQO-XSQXPFHXSA-N	42607465	CCCCC/C=C\C/C=C\C/C=C\C/C=C\CCCC(=O)OC[C@H](COP(=O)(O)OCCN)O	20	20	0.998306	0.935004	0.707094	-0.118405	0.961222	0.792772
	ONLI_0266	TAG 49:3; TAG 15:0-16:1-18:2;	CSHPOS	CQSXCZMDDSQLAG-RLFYQNGLSA-N	131754333	CCCCCCCCCCCCCCC(=O)OC[C@@H](COC(=O)CCCCCCC/C=C\C/C=C\CCCCC)OC(=O)CCCCCCC/C=C\CCCCCC	20	20	0.844347	0.997976	2.94e-07	1.37077	3.3064	1.7e-06
	ONLI_0267	TAG 48:0; TAG 14:0-16:0-18:0;	CSHPOS	JTDPHURHZMZJHD-DYVQZXGMSA-N	131753268	CCCCCCCCCCCCCCCCCC(=O)OC[C@H](COC(=O)CCCCCCCCCCCCC)OC(=O)CCCCCCCCCCCCCCC	20	20	0.918183	0.893955	0.906929	-0.0368711	1.05402	0.938798
	ONLI_0268	TAG 58:2; TAG 18:0-18:2-22:0;	CSHPOS	VTHDNMHRPKXWMZ-WMMWWMJFSA-N	131756084	CCCCCCCCCCCCCCCCCCCCCC(=O)OC[C@H](COC(=O)CCCCCCCCCCCCCCCCC)OC(=O)CCCCCCC/C=C\C/C=C\CCCCC	20	20	0.999193	0.992753	0.00214038	0.910415	2.18509	0.00520546
	ONLI_0269	TAG 46:0; TAG 14:0-16:0-16:0;	CSHPOS	JWVXCFSNEOMSHH-DXQCBLCSSA-N	91867460	CCCCCCCCCCCCCCCC(=O)OC[C@H](COC(=O)CCCCCCCCCCCCC)OC(=O)CCCCCCCCCCCCCCC	20	19	0.990711	0.824437	0.0597337	0.555887	1.24689	0.104534
	ONLI_0270	TAG 50:2; TAG 16:0-16:0-18:2;	CSHPOS	MTWYSKGJIDFSRC-IICCMCGVSA-N	25240356	CCCCCCCCCCCCCCCC(=O)OC[C@H](COC(=O)CCCCCCC/C=C\C/C=C\CCCCC)OC(=O)CCCCCCCCCCCCCCC	20	20	0.995326	0.949834	0.000126298	1.09959	2.49132	0.000392906
	ONLI_0271	Cer d40:1	CSHPOS	CJROVRTUSFQVMR-GVOPMEMSSA-N	5283570	CCCCCCCCCCCCCCCCCCCCCCCCCC(=O)N[C@@H](CO)[C@@H](/C=C/CCCCCCCCCCCCC)O	20	20	0.260802	0.260802	2.77e-10	1.56185	3.03237	6.19e-09
	ONLI_0272	PCp-32:0 or PC o-32:1	CSHPOS	HJVQHTGUAIETCQ-VEAYGOGPSA-N	52923742	CCCCCCCCCCCCCCCCOC[C@H](COP(=O)([O-])OCC[N+](C)(C)C)OC(=O)CCCCCCC/C=C\CCCCCC	20	19	0.980133	0.982859	7.75e-05	1.10478	1.20613	0.000254801
	ONLI_0273	TAG 58:0; TAG 18:0-18:0-22:0;	CSHPOS	KFFURWDSOSXFNL-XKJQNMSGSA-N	131755786	CCCCCCCCCCCCCCCCCCCCCC(=O)OC[C@H](COC(=O)CCCCCCCCCCCCCCCCC)OC(=O)CCCCCCCCCCCCCCCCC	20	20	0.722103	0.651736	0.501938	0.206003	1.21943	0.618775
	ONLI_0274	PE 38:7e; PE 16:1e/22:6; [M+H]+	CSHPOS	KGCPGAKRLOCUEV-ZLXBYIIJSA-N	138193153	CCCCCC/C=C\CCCCCCCCOCC(COP(=O)(O)OCCN)OC(=O)CC/C=C\C/C=C\C/C=C\C/C=C\C/C=C\C/C=C\CC	20	20	0.895848	0.3676	1.48e-09	1.52378	1.53505	1.86e-08
	ONLI_0275	PC16:0/16:0	CSHPOS	KILNVBDSWZSGLL-KXQOOQHDSA-N	452110	CCCCCCCCCCCCCCCC(=O)OC[C@H](COP(=O)([O-])OCC[N+](C)(C)C)OC(=O)CCCCCCCCCCCCCCC	19	20	0.351172	0.286415	0.000764301	0.94369	1.3199	0.00204406
	ONLI_0276	PC 36:5; PC 16:0-20:5;	CSHPOS	KLTHQSWIRFFBRI-RWSHWRRPSA-O	5313224	CCCCCCCCCCCCCCCC(=O)OCC(COP(=O)(O)OCC[N+](C)(C)C)OC(=O)CCC/C=C/C/C=C/C/C=C/C/C=C/C/C=C/CC	20	20	0.995812	0.960686	7.4e-06	1.24354	1.94446	3.09e-05
	ONLI_0277	PC38:3	CSHPOS	KNNHXKQRTYEWCA-HYYWERRFSA-N	53478919	CCCCCC/C=C\CCCCCCCCCC(=O)O[C@H](COC(=O)CCCCCCCCC/C=C\C/C=C\CCCCC)COP(=O)([O-])OCC[N+](C)(C)C	20	20	0.888259	0.510633	5.85e-05	1.14234	1.61142	0.000203867
	ONLI_0278	TAG 58:5; TAG 18:1-18:2-22:2;	CSHPOS	NRIOEETWLZWDRL-NUDAZDJUSA-N	131760195	CCCCCC/C=C\CCCCCCCCCC(=O)OC[C@@H](COC(=O)CCCCCCCCCCC/C=C\C/C=C\CCCCC)OC(=O)CCCCCCC/C=C\C/C=C\CCCCC	20	20	0.986469	0.842751	5.42e-08	1.42597	4.28254	3.73e-07
	ONLI_0280	PCo-40:6	CSHPOS	QBZALASVZLFAHF-KYPHJRDXSA-N	24779341	CCCCCCCCCCCCCCCCCCOC[C@H](COP(=O)([O-])OCC[N+](C)(C)C)OC(=O)CC/C=C\C/C=C\C/C=C\C/C=C\C/C=C\C/C=C\CC	20	20	0.991224	0.967005	0.551922	-0.187185	0.96015	0.65864
	ONLI_0281	TAG 49:1; TAG 15:0-16:0-18:1;	CSHPOS	KWXJMBTWCDOOOM-FMXLGRSFSA-N	131754160	CCCCCCCCCCCCCCCC(=O)O[C@@H](COC(=O)CCCCCCCCCCCCCC)COC(=O)CCCCCCCCC/C=C\CCCCCC	20	20	0.96752	0.99984	0.000380837	1.03246	2.06789	0.00109491
	ONLI_0282	PC38:2	CSHPOS	KXXLFCAPKGRXBT-FMJYHZMHSA-N	24779263	CCCCCCCCCCCCCCCCCCCC(=O)OC[C@H](COP(=O)([O-])OCC[N+](C)(C)C)OC(=O)CCCCCCC/C=C\C/C=C\CCCCC	20	20	0.260802	0.260802	2.77e-10	1.56185	4.49769	6.19e-09
	ONLI_0283	SMd32:1	CSHPOS	KYICBZWZQPCUMO-PSALXKTOSA-N	11433862	CCCCCCCCCCCCC/C=C/[C@H]([C@H](COP(=O)([O-])OCC[N+](C)(C)C)NC(=O)CCCCCCCCCCCCC)O	20	20	0.672473	0.387933	0.000945933	-0.971066	0.833895	0.00246432
	ONLI_0284	TAG 58:4; TAG 18:2-18:2-22:0;	CSHPOS	OEWUGNNMLZAOCV-HESLGCGWSA-N	25240386	CCCCCCCCCCCCCCCCCCCCCC(=O)OC[C@@H](COC(=O)CCCCCCC/C=C\C/C=C\CCCCC)OC(=O)CCCCCCC/C=C\C/C=C\CCCCC	20	20	0.986367	0.373893	1.39e-08	1.46588	3.64859	1.08e-07
	ONLI_0285	LPC 16:1	CSHPOS	LFUDDCMNKWEORN-ZXEGGCGDSA-N	24779461	CCCCCC/C=C\CCCCCCCC(=O)OC[C@H](COP(=O)([O-])OCC[N+](C)(C)C)O	20	20	0.975579	0.587499	3.81e-06	1.2725	1.80434	1.72e-05
	ONLI_0286	Cer-NS d37:4; Cer-NS d22:3/15:1;	CSHPOS	0	NA	0	20	20	0.991684	0.995242	0.33702	0.300953	1.0217	0.459055
	ONLI_0287	N-Octadecanoylsphing-4-enine-1-phosphocholine	CSHPOS	LKQLRGMMMAHREN-YJFXYUILSA-N	6453725	CCCCCCCCCCCCCCCCCC(=O)N[C@@H](COP(=O)([O-])OCC[N+](C)(C)C)[C@@H](/C=C/CCCCCCCCCCCCC)O	19	20	0.709717	0.998351	2.72e-08	-1.44127	0.49238	2.01e-07
	ONLI_0288	SMd36:1	CSHPOS	LKQLRGMMMAHREN-YJFXYUILSA-O	5283588	CCCCCCCCCCCCCCCCCC(=O)N[C@@H](COP(=O)(O)OCC[N+](C)(C)C)[C@@H](/C=C/CCCCCCCCCCCCC)O	20	20	0.418682	0.626264	6.47e-10	-1.5431	0.506798	1.11e-08
	ONLI_0289	LPC 17:1	CSHPOS	LPMGFNAQZPADDZ-FJIRUFBNSA-N	24779451	CCCCCCC/C=C\CCCCCCCC(=O)OC[C@H](COP(=O)([O-])OCC[N+](C)(C)C)O	20	20	1	0.969755	8.54e-08	1.41179	1.62568	5.59e-07
	ONLI_0290	SMd33:1	CSHPOS	LQINJRUGTUOHGS-YPDYIYJKSA-N	52931139	CCCCCCCCCCCCCCC(=O)N[C@@H](COP(=O)([O-])OCC[N+](C)(C)C)[C@@H](/C=C/CCCCCCCCCCCCC)O	20	19	0.95683	0.95736	1e-06	-1.31302	0.773869	5.15e-06
	ONLI_0291	LPC 22:6	CSHPOS	LSOWKZULVQWMLY-APPDJCNMSA-N	10415542	CC/C=C\C/C=C\C/C=C\C/C=C\C/C=C\C/C=C\CCC(=O)OC[C@H](COP(=O)([O-])OCC[N+](C)(C)C)O	19	19	0.917021	0.603097	0.000964845	-0.88248	0.828107	0.00250548
	ONLI_0292	TAG 52:3; TAG 16:1-18:1-18:1;	CSHPOS	YBWITEZBUYUNFC-JZBMGIQCSA-N	102240596	CCCCCCCC/C=C\CCCCCCCC(=O)OC[C@H](COC(=O)CCCCCCC/C=C\CCCCCC)OC(=O)CCCCCCC/C=C\CCCCCCCC	20	20	0.854499	0.946182	0.000629327	0.999307	1.76943	0.00170575
	ONLI_0293	TAG 51:4; TAG 15:0-16:0-20:4;	CSHPOS	LVHOHHSODZICOO-IIKXJSSRSA-N	131750647	CCCCCCCCCCCCCCCC(=O)O[C@@H](COC(=O)CCCCCCCCCCCCCC)COC(=O)CCC/C=C\C/C=C\C/C=C\C/C=C\CCCCC	20	20	0.986589	0.833887	2.57e-05	1.18477	1.94168	9.67e-05
	ONLI_0294	TAG 56:6; TAG 16:0-18:1-22:5;	CSHPOS	LXKOOMKDVRTCPD-NMQVVHJTSA-N	131755185	CCCCCCCCCCCCCCCC(=O)OC[C@@H](COC(=O)CCCCC/C=C\C/C=C\C/C=C\C/C=C\C/C=C\CC)OC(=O)CCCCCCCCC/C=C\CCCCCC	20	20	0.989948	0.66349	0.00188213	0.920353	1.59886	0.00469076
	ONLI_0295	SM d42:3; SM d14:1/28:2;	CSHPOS	0	NA	0	20	20	0.975421	0.999921	0.0203204	0.706303	1.12138	0.0402905
	ONLI_0296	PC 40:8; PC 20:4-20:4;	CSHPOS	LZLVZIFMYXDKCN-QJWFYWCHSA-N	24779076	CCCCC/C=C\C/C=C\C/C=C\C/C=C\CCCC(=O)OC[C@H](COP(=O)([O-])OCC[N+](C)(C)C)OC(=O)CCC/C=C\C/C=C\C/C=C\C/C=C\CCCCC	20	20	0.418682	0.626264	6.47e-10	1.5431	1.79402	1.11e-08
	ONLI_0299	TAG 51:4; TAG 16:0-17:2-18:2;	CSHPOS	MBVRTVOCODAFTO-ZQYFXHSESA-N	138208584	CCCCCCCCCCCCCCCC(=O)OCC(COC(=O)CCCCCCCC/C=C\C=C/CCCCC)OC(=O)CCCCCCCCC/C=C\C/C=C\CC	20	20	0.835913	0.779619	4.92e-06	1.26148	2.18803	2.15e-05
	ONLI_0300	PC37:2	CSHPOS	MCZUABDVGPPWPM-HJTCUGKVSA-N	52922735	CCCCCCCCCCCCCCCCCCC(=O)O[C@H](COC(=O)CCCCCCC/C=C\C/C=C\CCCCC)COP(=O)([O-])OCC[N+](C)(C)C	20	20	0.260802	0.260802	2.77e-10	1.56185	2.83987	6.19e-09
	ONLI_0301	TAG 52:3; TAG 16:0-18:0-18:3;	CSHPOS	QRLNWUKVSNTXQG-VWMLCLGZSA-N	131755026	CCCCCCCCCCCCCCCCCC(=O)O[C@@H](COC(=O)CCCCCCCCCCCCCCC)COC(=O)CCCCCCC/C=C\C/C=C\C/C=C\CC	20	20	0.892741	0.979177	0.0257996	0.680393	1.15599	0.0498049
	ONLI_0302	SMd38:2	CSHPOS	MDRFMTLYKHBJTF-NQYLGBTJSA-N	52931179	CCCCCCCCCCCCC/C=C/[C@H]([C@H](COP(=O)([O-])OCC[N+](C)(C)C)NC(=O)CCCCCCCCC/C=C\CCCCCCCC)O	20	20	0.999767	0.8552	3.02e-08	1.44352	1.64152	2.21e-07
	ONLI_0303	PC35:1	CSHPOS	MFHIZGSSDZJFKD-IYEJTHTFSA-N	52922679	CCCCCCCCCCCCCCCCC(=O)O[C@H](COC(=O)CCCCCCC/C=C\CCCCCCCC)COP(=O)([O-])OCC[N+](C)(C)C	20	20	0.741763	0.410589	8.53e-10	1.53676	2.03185	1.25e-08
	ONLI_0304	TAG 60:1; TAG 18:1-20:0-22:0;	CSHPOS	MFTJGJJGQONILX-RXNSVRMPSA-N	131757302	CCCCCCCCCCCCCCCCCCCCCC(=O)OC[C@@H](COC(=O)CCCCCCCCC/C=C\CCCCCC)OC(=O)CCCCCCCCCCCCCCCCCCC	19	20	0.0406996	0.000820557	0.0176686	0.608331	2.47456	0.035206
	ONLI_0306	PC35:2 A	CSHPOS	MJWAVUYQCBFFHQ-WESJWMGVSA-N	52922721	CCCCCCCCCCCCCCCCC(=O)O[C@H](COC(=O)CCCCCCC/C=C\C/C=C\CCCCC)COP(=O)([O-])OCC[N+](C)(C)C	20	20	0.98306	0.506993	3.22e-09	1.50461	1.6701	3.2e-08
	ONLI_0307	TAG 53:3; TAG 17:0-17:0-19:3;	CSHPOS	0	NA	0	20	20	0.994791	0.707243	0.000176371	1.08005	1.82002	0.000529772
	ONLI_0308	CE (20:3)	CSHPOS	MLPRJPSMAFZPLA-PJSAOELNSA-N	53477892	CCCCC/C=C\C/C=C\C/C=C\CCCCCCC(=O)O[C@H]1CC[C@@]2(C3CC[C@]4(C(C3CC=C2C1)CCC4[C@H](C)CCCC(C)C)C)C	20	19	0.890363	0.937413	0.00200492	0.898294	1.89707	0.00496849
	ONLI_0310	DAG 36:4; DAG 18:2-18:2;	CSHPOS	MQGBAQLIFKSMEM-ZHARMHCNSA-N	9543729	CCCCC/C=C\C/C=C\CCCCCCCC(=O)OC[C@H](CO)OC(=O)CCCCCCC/C=C\C/C=C\CCCCC	20	20	0.856811	0.304517	0.000185196	1.07714	1.52367	0.000554211
	ONLI_0311	TAG 55:4; TAG 18:1-18:2-19:1;	CSHPOS	MUPLOFIEWBEBDZ-GMWWFSEGSA-N	138214690	CCCCCCCCC/C=C\CCCCCCCC(=O)OCC(COC(=O)CCCCCCCCC/C=C\CCCCCC)OC(=O)CCCCCCCC/C=C\C=C/CCCCC	20	20	0.999904	0.999991	1.21e-05	1.22114	2.16252	4.79e-05
	ONLI_0312	TAG 48:4; TAG 12:0-18:2-18:2;	CSHPOS	MVLRQPPTISTJFW-ZHSZNRNPSA-N	138214981	CCCCCCCCCCCC(=O)OCC(COC(=O)CCCCCCCC/C=C\C=C/CCCCC)OC(=O)CCCCCCCC/C=C\C=C/CCCCC	20	20	0.925702	0.8921	9.91e-05	1.11337	2.20275	0.000312993
	ONLI_0313	PE 18:1-18:1;	CSHPOS	MWRBNPKJOOWZPW-NYVOMTAGSA-N	9546757	CCCCCCCC/C=C\CCCCCCCC(=O)OC[C@H](COP(=O)(O)OCCN)OC(=O)CCCCCCC/C=C\CCCCCCCC	20	20	0.970764	0.526852	1.66e-07	1.39024	2.09324	1e-06
	ONLI_0314	CE (18:2)	CSHPOS	NAACPBBQTFFYQB-XHDSEGDBSA-N	131801653	CCCCC/C=C\C/C=C\CCCCCCCC(=O)O[C@H]1CC[C@@]2(C3CC[C@]4(C(C3CC=C2C1)CCC4[C@H](C)CCCC(C)C)C)C	20	20	0.959833	0.998855	0.00060062	1.00246	1.36801	0.00163344
	ONLI_0315	TAG 54:8; TAG 16:0-18:3-20:5;	CSHPOS	MLMMWEQUUKJWQX-VOLMLRHSSA-N	131755359	CCCCCCCCCCCCCCCC(=O)OC[C@@H](COC(=O)CCC/C=C\C/C=C\C/C=C\C/C=C\C/C=C\CC)OC(=O)CCCC/C=C\C/C=C\C/C=C\CCCCC	20	20	0.99896	0.999999	2.01e-06	1.29893	2.03326	9.56e-06
	ONLI_0316	SMd36:2	CSHPOS	NBEADXWAAWCCDG-QDDWGVBQSA-N	6443882	CCCCCCCCCCCCC/C=C/[C@H]([C@H](COP(=O)([O-])OCC[N+](C)(C)C)NC(=O)CCCCCCC/C=C\CCCCCCCC)O	20	20	0.870046	0.99996	9.17e-08	-1.40951	0.692915	5.95e-07
	ONLI_0317	PC 42:10; PC 20:4-22:6;	CSHPOS	APEHGLQXFOZAEF-MHNOHXJZSA-N	52923327	CCCCC/C=C\C/C=C\C/C=C\C/C=C\CCCC(=O)OC[C@H](COP(=O)([O-])OCC[N+](C)(C)C)OC(=O)CC/C=C\C/C=C\C/C=C\C/C=C\C/C=C\C/C=C\CC	20	20	0.410042	0.497908	4.89e-10	1.54938	2.15374	8.95e-09
	ONLI_0318	TAG 56:8; TAG 18:2-18:3-20:3;	CSHPOS	MWPUONRBGFMSLE-FXGUSIRISA-N	131763293	CCCCC/C=C\C/C=C\CCCCCCCC(=O)OC[C@@H](COC(=O)CCCCCC/C=C\C/C=C\C/C=C\CCCCC)OC(=O)CCCC/C=C\C/C=C\C/C=C\CCCCC	20	20	0.999955	0.98249	0.902079	0.0388017	1.01117	0.938209
	ONLI_0319	TAG 55:4; TAG 15:1-19:0-21:3;	CSHPOS	NJIJHXNPEZSWHJ-GGRUKSBGSA-N	138219306	CCCCCCCCCCCCCCCCCCC(=O)OC(COC(=O)CCCCCCC/C=C\CCCCC)COC(=O)CCCCCCC/C=C\C=C/C=C\CCCCCCC	20	20	0.995344	0.953444	9.19e-06	1.23378	2.12601	3.72e-05
	ONLI_0320	PC36:4 A	CSHPOS	NKQPOVROGSWLTO-NVPMBMBWSA-N	52922783	CCCCCCCC/C=C\CCCCCCCC(=O)O[C@H](COC(=O)CCCC/C=C\C/C=C\C/C=C\CCCCC)COP(=O)([O-])OCC[N+](C)(C)C	20	20	0.999995	0.970744	5.75e-07	1.34684	1.33994	3.15e-06
	ONLI_0321	PCo-42:5	CSHPOS	NLEDXBSUDVLSEN-UFFJXODHSA-N	52924034	CCCCCCCCCCCCCCCCCC/C=C\OC[C@H](COP(=O)([O-])OCC[N+](C)(C)C)OC(=O)CCCCC/C=C\C/C=C\C/C=C\C/C=C\CCCCC	20	20	0.488752	0.383617	0.348013	0.294257	1.07729	0.468479
	ONLI_0322	TAG 54:4; TAG 16:1-18:0-20:3;	CSHPOS	IJAGVFPXKMAQRV-PGYKOVLESA-N	131759314	CCCCCCCCCCCCCCCCCC(=O)O[C@@H](COC(=O)CCCCCCC/C=C\CCCCCC)COC(=O)CCC/C=C\C/C=C\C/C=C\CCCCCCCC	20	20	0.793293	0.875651	0.0106665	0.771525	1.49332	0.0227156
	ONLI_0323	PC 36:0; PC 18:0-18:0;	CSHPOS	NRJAVPSFFCBXDT-HUESYALOSA-N	94190	CCCCCCCCCCCCCCCCCC(=O)OC[C@H](COP(=O)([O-])OCC[N+](C)(C)C)OC(=O)CCCCCCCCCCCCCCCCC	20	20	0.812302	0.81241	5.85e-08	-1.42364	0.687514	3.99e-07
	ONLI_0324	PE 36:5e; PE 16:0e/20:5;	CSHPOS	NTBDNAWCQLUDHG-CEGBOXLASA-N	52925030	CCCCCCCCCCCCCCCCOC[C@H](COP(=O)(O)OCCN)OC(=O)CCC/C=C\C/C=C\C/C=C\C/C=C\C/C=C\CC	20	20	0.744807	0.46002	0.00402939	0.859173	1.17348	0.00920316
	ONLI_0325	PC16:0/18:2	CSHPOS	NVWYLRLKCCCUBZ-UOBGCCIWSA-N	134753865	CCCCCCCCCCCCCCCC(=O)OC[C@H](COP(=O)([O-])OCC[N+](C)(C)C)OC(=O)CCCC/C=C/C/C=C/CCCCCCCC	19	20	0.730582	0.997378	1.53e-06	-1.28252	0.876966	7.44e-06
	ONLI_0326	TAG 44:1; TAG 12:0-16:0-16:1;	CSHPOS	OBZBCSUQYLLPST-BZZOAKBMSA-N	138225270	CCCCCCCCCCCCCCCC(=O)OC(COC(=O)CCCCCCCCCCC)COC(=O)CCCCC/C=C\CCCCCCCC	20	20	0.0899216	0.00396257	0.0694851	0.51424	1.34668	0.120551
	ONLI_0327	PC33:1	CSHPOS	OFRWLQSOUIZELQ-VEAYGOGPSA-N	52922442	CCCCCCCCCCCCCCCCC(=O)O[C@H](COC(=O)CCCCCCC/C=C\CCCCCC)COP(=O)([O-])OCC[N+](C)(C)C	20	20	0.741763	0.410589	8.53e-10	1.53676	2.9557	1.25e-08
	ONLI_0328	TAG 54:5; TAG 18:0-18:2-18:3;	CSHPOS	FOOVNYMOCOZYCS-FEJMAITCSA-N	131756093	CCCCCCCCCCCCCCCCCC(=O)OC[C@@H](COC(=O)CCCC/C=C\C/C=C\C/C=C\CCCCC)OC(=O)CCCCCCC/C=C\C/C=C\CCCCC	20	20	0.903337	0.997412	0.0394607	0.63155	1.39638	0.0721966
	ONLI_0329	TAG 56:8; TAG 16:1-18:1-22:6;	CSHPOS	OBEVBHFXQRTJAZ-AAMJSBRJSA-N	131759453	CCCCCC/C=C\CCCCCCCCCC(=O)O[C@@H](COC(=O)CCCCCCC/C=C\CCCCCC)COC(=O)CC/C=C\C/C=C\C/C=C\C/C=C\C/C=C\C/C=C\CC	20	20	0.883481	0.956628	0.158755	0.438655	1.09505	0.24767
	ONLI_0330	PC37:3	CSHPOS	WZCLAXMADUBPSG-RIXBAXMTSA-N	52922657	CCCCCCCCCCCCCCCCCC(=O)OC[C@H](COP(=O)([O-])OCC[N+](C)(C)C)OC(=O)CCCCCCC/C=C\C/C=C\C/C=C\CC	20	20	0.849345	0.979648	1.04e-08	1.47371	1.69951	8.58e-08
	ONLI_0331	DAG 24:0; DAG 12:0-12:0;	CSHPOS	OQQOAWVKVDAJOI-UHFFFAOYSA-N	33979	CCCCCCCCCCCC(=O)OCC(CO)OC(=O)CCCCCCCCCCC	20	19	0.90869	0.620419	0.0141048	0.712755	1.10447	0.0287452
	ONLI_0332	PC35:4	CSHPOS	ZSWHHKKYMMYPPD-MSZSINMWSA-N	52922330	CCCCCCCCCCCCCCC(=O)OC[C@H](COP(=O)([O-])OCC[N+](C)(C)C)OC(=O)CCC/C=C\C/C=C\C/C=C\C/C=C\CCCCC	20	20	0.3676	0.895848	1.48e-09	1.52378	1.63002	1.86e-08
	ONLI_0333	TAG 56:1; TAG 16:0-18:1-22:0;	CSHPOS	OZXLEWFIONDQJM-SKYDHSLNSA-N	131755163	CCCCCCCCCCCCCCCCCCCCCC(=O)OC[C@H](COC(=O)CCCCCCCCCCCCCCC)OC(=O)CCCCCCCCC/C=C\CCCCCC	20	20	0.896595	0.93885	6.56e-05	1.1302	2.91948	0.000221949
	ONLI_0334	TAG 46:1; TAG 14:0-16:0-16:1;	CSHPOS	JYICXCHHKWVGEI-FIZKWYBOSA-N	131753273	CCCCCCCCCCCCCCCC(=O)O[C@@H](COC(=O)CCCCCCCCCCCCC)COC(=O)CCCCCCC/C=C\CCCCCC	20	20	0.812195	0.694142	0.000265424	1.05524	2.64927	0.000788436
	ONLI_0335	LPC 22:1	CSHPOS	PAFOXYLFALKPOE-BKAVPCLVSA-N	53480471	CCCCCCCC/C=C\CCCCCCCCCCCC(=O)OC[C@H](COP(=O)([O-])OCC[N+](C)(C)C)O	20	20	0.260802	0.260802	2.77e-10	1.56185	2.88835	6.19e-09
	ONLI_0336	SMd32:2	CSHPOS	PEJGMBUENJSLLH-RHAKMSQVSA-N	52931131	CCCCCCCCCCCCCC(=O)N[C@@H](COP(=O)([O-])OCC[N+](C)(C)C)[C@@H](/C=C/CCCCCCCC/C=C\CCC)O	20	20	0.153088	0.00402652	0.208193	0.36357	1.12093	0.310361
	ONLI_0337	DAG 36:5; DAG 18:2-18:3;	CSHPOS	PGXBELQFNRPKBC-WBVIKXMWSA-N	9543737	CCCCC/C=C\C/C=C\CCCCCCCC(=O)OC[C@H](CO)OC(=O)CCCCCCC/C=C\C/C=C\C/C=C\CC	20	20	0.8621	0.855526	0.000574403	1.00547	1.62437	0.00157814
	ONLI_0338	TAG 42:0; TAG 12:0-14:0-16:0;	CSHPOS	PGZSAELMQZLYOA-WBCKFURZSA-N	131803451	CCCCCCCCCCCCCCCC(=O)OC[C@H](COC(=O)CCCCCCCCCCC)OC(=O)CCCCCCCCCCCCC	20	20	0.0365706	0.0110069	0.63868	0.133411	1.08687	0.735269
	ONLI_0339	PCp-40:7 or PC o-40:8	CSHPOS	PWAHARWXEAMNGK-VCDFOAEJSA-N	53480839	CCCCCCCC/C=C\CCCCCC/C=C\OC[C@H](COP(=O)([O-])OCC[N+](C)(C)C)OC(=O)CC/C=C\C/C=C\C/C=C\C/C=C\C/C=C\C/C=C\CC	20	20	0.999255	0.981477	0.000145227	1.0915	1.48427	0.00044116
	ONLI_0340	TAG 54:6; TAG 18:1-18:2-18:3;	CSHPOS	OTUIORVXGJUHBH-JBQDKWDBSA-N	100921577	CCCCCCCC/C=C\CCCCCCCC(=O)OC[C@@H](COC(=O)CCCCCCC/C=C\C/C=C\C/C=C\CC)OC(=O)CCCCCCC/C=C\C/C=C\CCCCC	20	20	0.791908	0.84848	0.0354079	0.64436	1.73764	0.0656759
	ONLI_0341	LPE 18:1	CSHPOS	PYVRVRFVLRNJLY-MZMPXXGTSA-N	9547071	CCCCCCCC/C=C\CCCCCCCC(=O)OC[C@H](COP(=O)(O)OCCN)O	19	20	0.628065	0.978427	0.0737027	0.542465	1.13928	0.127319
	ONLI_0342	PC34:0	CSHPOS	PZNPLUBHRSSFHT-RRHRGVEJSA-N	24778686	CCCCCCCCCCCCCCCCCC(=O)O[C@H](COC(=O)CCCCCCCCCCCCCCC)COP(=O)([O-])OCC[N+](C)(C)C	19	20	0.713656	0.837539	0.101543	-0.486285	0.918972	0.171008
	ONLI_0343	SMd42:1	CSHPOS	QEDPUVGSSDPBMD-XTAIVQBESA-O	5283595	CCCCCCCCCCCCCCCCCCCCCCCC(=O)N[C@@H](COP(=O)(O)OCC[N+](C)(C)C)[C@@H](/C=C/CCCCCCCCCCCCC)O	20	20	0.948457	0.8464	0.0103319	0.774587	1.21617	0.0221202
	ONLI_0344	PCo-34:3	CSHPOS	QEWRXEALGMKRGP-MZWPLUPDSA-N	24779293	CCCCCCCCCCCCCCCCOC[C@H](COP(=O)([O-])OCC[N+](C)(C)C)OC(=O)CCCC/C=C\C/C=C\C/C=C\CCCCC	20	20	0.898479	0.775071	1.08e-07	1.40439	1.60859	6.87e-07
	ONLI_0345	SMd34:0	CSHPOS	ANBFFIILUQJIQL-XFGXVVNZSA-N	9544103	CCCCCCCCCCCCCCCCC(=O)OC[C@H](COC(=O)CCCCCCC/C=C\CCCCCCCC)OC(=O)CCCCCCC/C=C\CCCCCCCC	20	20	0.998557	0.999481	0.886118	-0.0451653	1.00187	0.926396
	ONLI_0346	PC 32:1; PC 16:0-16:1;	CSHPOS	QIBZFHLFHCIUOT-NPBIGWJUSA-N	6443788	CCCCCCCCCCCCCCCC(=O)OC[C@H](COP(=O)([O-])OCC[N+](C)(C)C)OC(=O)CCCCCCC/C=C\CCCCCC	20	20	0.989622	0.651345	4.13e-09	1.49833	3.1633	4.02e-08
	ONLI_0347	TAG 58:9; TAG 18:1-18:2-22:6;	CSHPOS	NWOHTDXNYMHGGE-HAXGSABZSA-N	131760203	CCCCCC/C=C\CCCCCCCCCC(=O)OC[C@@H](COC(=O)CC/C=C\C/C=C\C/C=C\C/C=C\C/C=C\C/C=C\CC)OC(=O)CCCCCCC/C=C\C/C=C\CCCCC	20	20	0.992896	0.991301	0.572461	-0.177645	0.902441	0.674716
	ONLI_0348	PC39:6	CSHPOS	KSRURLYJRNYEOH-SHHFQLSYSA-N	24778795	CCCCCCCCCCCCCCCCC(=O)OC[C@H](COP(=O)([O-])OCC[N+](C)(C)C)OC(=O)CC/C=C\C/C=C\C/C=C\C/C=C\C/C=C\C/C=C\CC	20	20	0.998651	0.994007	0.000372985	1.03379	1.21124	0.00107618
	ONLI_0349	PC 38:6e; PC 16:0e/22:6;	CSHPOS	QQQQNYAHSSIZBU-HIQXTUQZSA-N	16759366	CCCCCCCCCCCCCCCCOC[C@H](COP(=O)([O-])OCC[N+](C)(C)C)OC(=O)CC/C=C\C/C=C\C/C=C\C/C=C\C/C=C\C/C=C\CC	19	19	0.992589	0.640575	6.83e-08	1.36081	1.96546	4.62e-07
	ONLI_0350	TAG 53:4; TAG 17:1-18:1-18:2;	CSHPOS	VESVDAJIPQIOEH-NAAHWEMHSA-N	9544155	CCCCCCCC/C=C\CCCCCCCC(=O)O[C@H](COC(=O)CCCCCCC/C=C\CCCCCCC)COC(=O)CCCCCCC/C=C\C/C=C\CCCCC	20	20	0.982585	0.995814	7.2e-05	1.13108	1.95348	0.000239618
	ONLI_0351	PC37:4	CSHPOS	QRPUCJXFPYFTMB-FBFLODOBSA-N	52922853	CCCCCCCCC/C=C\CCCCCCCC(=O)O[C@H](COC(=O)CCCCCCC/C=C\C/C=C\C/C=C\CC)COP(=O)([O-])OCC[N+](C)(C)C	20	20	0.631615	0.981121	0.0157246	0.733032	1.12055	0.0318048
	ONLI_0352	TAG 56:8; TAG 16:0-18:2-22:6;	CSHPOS	RDZINTYLBOTMAU-CQEMWSBKSA-N	131755335	CCCCCCCCCCCCCCCC(=O)OC[C@@H](COC(=O)CC/C=C\C/C=C\C/C=C\C/C=C\C/C=C\C/C=C\CC)OC(=O)CCCCCCC/C=C\C/C=C\CCCCC	20	20	0.991672	0.998924	0.033462	0.650942	1.29576	0.0626439
	ONLI_0353	PC 40:8e; PC 18:2e/22:6;	CSHPOS	0	NA	0	20	20	0.722213	0.872239	0.110147	0.495396	1.15754	0.183199
	ONLI_0354	Heptadecasphing-4-enine	CSHPOS	RBEJCQPPFCKTRZ-LHMZYYNSSA-N	5283557	CCCCCCCCCCCC/C=C/[C@H]([C@H](CO)N)O	20	19	0.96974	0.839199	0.750424	-0.0985357	0.987245	0.823013
	ONLI_0355	AC 20:4;	CSHPOS	RBFQHRALHSUPIA-JTPUQHSZSA-N	136212424	CCCCC/C=C\C/C=C\C/C=C\C/C=C\CCCC(=O)O[C@H](CC(=O)[O-])C[N+](C)(C)C	19	20	0.991206	0.980119	0.000988116	-0.926505	0.648309	0.00255767
	ONLI_0356	TAG 52:1; TAG 16:0-18:0-18:1;	CSHPOS	NPCZZYKITFKRQZ-RFBIWTDZSA-N	5365005	CCCCCCCCCCCCCCCCCC(=O)OC(COC(=O)CCCCCCCCCCCCCCC)COC(=O)CCCCCCC/C=C\CCCCCCCC	20	20	0.931554	0.94657	0.0243005	0.686987	1.68128	0.0473654
	ONLI_0358	PCo-40:4	CSHPOS	RDNHPNJCALITSY-MBZSPAKGSA-N	52923852	CCCCCCCCCCCCCCCCCCCCOC[C@H](COP(=O)([O-])OCC[N+](C)(C)C)OC(=O)CCC/C=C\C/C=C\C/C=C\C/C=C\CCCCC	20	20	0.999762	0.999139	0.000502802	-1.01434	0.819338	0.0014054
	ONLI_0359	CE (20:2)	CSHPOS	REFJKOQDWJELKE-NJJZEKHRSA-N	53477891	CCCCC/C=C\C/C=C\CCCCCCCCCC(=O)O[C@H]1CC[C@@]2(C3CC[C@]4(C(C3CC=C2C1)CCC4[C@H](C)CCCC(C)C)C)C	20	19	0.999636	0.825778	0.0043969	0.815665	1.91651	0.00997043
	ONLI_0360	TAG 50:5; TAG 14:0-16:0-20:5;	CSHPOS	REVSLNKZXRDJPV-ROXMGXQMSA-N	131753291	CCCCCCCCCCCCCCCC(=O)O[C@@H](COC(=O)CCCCCCCCCCCCC)COC(=O)CCC/C=C\C/C=C\C/C=C\C/C=C\C/C=C\CC	20	20	0.990536	0.87218	1.42e-05	1.2136	2.3513	5.55e-05
	ONLI_0361	TAG 58:3; TAG 18:1-18:2-22:0;	CSHPOS	REWHXIGYTWQEOU-RUAITIBSSA-N	138251358	CCCCCCCCCCCCCCCCCCCCCC(=O)OCC(COC(=O)CCCCCCCCC/C=C\CCCCCC)OC(=O)CCCCCCCC/C=C\C=C/CCCCC	20	20	1	0.999996	3.01e-05	1.1769	2.63097	0.000111629
	ONLI_0362	CE (18:1)	CSHPOS	RJECHNNFRHZQKU-RMUVNZEASA-N	5283632	CCCCCCCC/C=C\CCCCCCCC(=O)O[C@H]1CC[C@@]2([C@H]3CC[C@]4([C@H]([C@@H]3CC=C2C1)CC[C@@H]4[C@H](C)CCCC(C)C)C)C	19	20	0.760782	0.85972	0.0162177	-0.716623	0.732622	0.0327199
	ONLI_0363	LPC 15:0	CSHPOS	RJZVWDTYEWCUAR-JOCHJYFZSA-N	24779458	CCCCCCCCCCCCCCC(=O)OC[C@H](COP(=O)([O-])OCC[N+](C)(C)C)O	20	20	0.981409	0.968505	0.00110161	0.960177	1.18888	0.00282418
	ONLI_0364	TAG 44:2; TAG 14:0-14:1-16:1;	CSHPOS	SGPSMGCUZQMTGS-CCRVATGYSA-N	131753421	CCCCCCCCCCCCCC(=O)OC[C@@H](COC(=O)CCCCCCC/C=C\CCCCCC)OC(=O)CCCCCCC/C=C\CCCC	20	20	0.165996	0.00145345	0.00622037	0.741148	1.79567	0.0137033
	ONLI_0365	TAG 52:4; TAG 16:0-18:1-18:3;	CSHPOS	VMDPPWLXQNSYER-RPLIZZJZSA-N	131755181	CCCCCCCCCCCCCCCC(=O)OC[C@@H](COC(=O)CCCCCCC/C=C\C/C=C\C/C=C\CC)OC(=O)CCCCCCCCC/C=C\CCCCCC	20	20	0.99096	0.968634	0.0004714	1.01859	1.23886	0.00132684
	ONLI_0366	SMd34:1	CSHPOS	RWKUXQNLWDTSLO-GWQJGLRPSA-O	5283590	CCCCCCCCCCCCCCCC(=O)N[C@@H](COP(=O)(O)OCC[N+](C)(C)C)[C@@H](/C=C/CCCCCCCCCCCCC)O	20	19	0.968521	0.999581	7.59e-05	-1.11853	0.838933	0.000251368
	ONLI_0367	PC33:2	CSHPOS	SBNDHGBVMZMSNL-UESLNCBNSA-N	52922715	CCCCCCCCCCCCCCC(=O)O[C@H](COC(=O)CCCCCCC/C=C\C/C=C\CCCCC)COP(=O)([O-])OCC[N+](C)(C)C	20	20	0.681976	0.559054	8.49e-10	1.53686	1.87443	1.25e-08
	ONLI_0368	TAG 52:0; TAG 16:0-18:0-18:0;	CSHPOS	CEEXXJUVQPNYKF-IONAWPRUSA-N	131755032	CCCCCCCCCCCCCCCCCCOC[C@H](COC(=O)CCCCCCCCCCCCCCC)OC(=O)CCCCCCCCCCCCCCCCC	20	20	0.999661	0.999999	0.770978	-0.0917604	0.963338	0.838107
	ONLI_0369	TAG 51:2; TAG 16:0-17:0-18:2;	CSHPOS	SEJGBQZTRJHHNJ-OCGDUTRDSA-N	138259707	CCCCCCCCCCCCCCCCC(=O)OC(COC(=O)CCCCCCCCCCCCCCC)COC(=O)CCCCCCCC/C=C\C=C/CCCCC	20	20	0.602177	0.927636	6.18e-05	1.13942	2.59191	0.000211575
	ONLI_0371	LPC 24:0	CSHPOS	SKJMUADLQLZAGH-WJOKGBTCSA-N	24779481	CCCCCCCCCCCCCCCCCCCCCCCC(=O)OC[C@H](COP(=O)([O-])OCC[N+](C)(C)C)O	20	19	0.771055	0.741452	7.88e-05	1.07709	1.20969	0.000257926
	ONLI_0372	PC 36:2e; PC 18:1e/18:1;	CSHPOS	GSROTDACALJGFK-YIFANWOHSA-N	53481725	CCCCCCCC/C=C\CCCCCCCCOC[C@H](COP(=O)([O-])OCC[N+](C)(C)C)OC(=O)CCCCCCCCC/C=C\CCCCCC	20	20	0.999838	0.826547	6.34e-07	1.34324	1.36073	3.43e-06
	ONLI_0373	PC 36:2	CSHPOS	SNKAWJBJQDLSFF-NVKMUCNASA-N	10350317	CCCCCCCC/C=C\CCCCCCCC(=O)OC[C@H](COP(=O)([O-])OCC[N+](C)(C)C)OC(=O)CCCCCCC/C=C\CCCCCCCC	20	20	0.931608	0.717653	2.27e-05	1.19088	1.30421	8.63e-05
	ONLI_0374	LPC 18:2	CSHPOS	SPJFYYJXNPEZDW-FTJOPAKQSA-N	11005824	CCCCC/C=C\C/C=C\CCCCCCCC(=O)OC[C@H](COP(=O)([O-])OCC[N+](C)(C)C)O	20	20	0.999823	0.98743	0.742831	-0.103411	0.992035	0.818028
	ONLI_0375	PC36:6	CSHPOS	SPWBDEZMKCRQSX-NGPPOSSDSA-N	52922847	CCCCC/C=C\C/C=C\C/C=C\CCCCC(=O)O[C@H](COC(=O)CCCCCCC/C=C\C/C=C\C/C=C\CC)COP(=O)([O-])OCC[N+](C)(C)C	20	20	0.371751	0.371751	3.69e-10	1.55562	3.68145	7.42e-09
	ONLI_0376	CE ( 22:1)	CSHPOS	SQHUGNAFKZZXOT-QXAJUEOOSA-N	16219158	CCCCCCCC/C=C\CCCCCCCCCCCC(=O)O[C@H]1CC[C@@]2([C@H]3CC[C@]4([C@H]([C@@H]3CC=C2C1)CC[C@@H]4[C@H](C)CCCC(C)C)C)C	20	20	0.948002	0.999639	0.845559	-0.061421	0.958884	0.897988
	ONLI_0378	PE 36:4; PE 18:2-18:2;	CSHPOS	SSCDRSKJTAQNNB-DWEQTYCFSA-N	9546812	CCCCC/C=C\C/C=C\CCCCCCCC(=O)OC[C@H](COP(=O)(O)OCCN)OC(=O)CCCCCCC/C=C\C/C=C\CCCCC	20	19	0.999678	0.407559	2.22e-08	1.45454	2.78166	1.65e-07
	ONLI_0379	PC38:5 A	CSHPOS	SUACBSWYGWBPFC-GPUJSUHJSA-N	52923235	CCCCC/C=C\C/C=C\CCCCCCCC(=O)O[C@H](COC(=O)CCCCCC/C=C\C/C=C\C/C=C\CCCCC)COP(=O)([O-])OCC[N+](C)(C)C	20	20	0.972333	0.998772	0.000514672	1.01279	1.33094	0.0014286
	ONLI_0380	PCo-32:0	CSHPOS	SVWBXNAUENUONE-LDLOPFEMSA-N	173570	CCCCCCCCCCCCCCCCO[C@H](COC(=O)CCCCCCCCCCCCCCC)COP(=O)([O-])OCC[N+](C)(C)C	20	20	0.992469	0.524168	5.57e-09	1.49053	1.47171	5.1e-08
	ONLI_0381	SMd41:1	CSHPOS	SXZWBNWTCVLZJN-NMIJJABPSA-N	46891684	CCCCCCCCCCCCCCCCCCCCCCC(=O)N[C@@H](COP(=O)([O-])OCC[N+](C)(C)C)[C@@H](/C=C/CCCCCCCCCCCCC)O	20	20	0.999886	0.804234	6.83e-05	-1.13402	0.812751	0.000229882
	ONLI_0382	PC 40:7e; PC 18:1e/22:6;	CSHPOS	TXHZYNSTTCIWMJ-RXSQUPBGSA-N	42607430	CCCCCCCCCCCCCCCC/C=C\OC[C@H](COP(=O)([O-])OCC[N+](C)(C)C)OC(=O)CC/C=C\C/C=C\C/C=C\C/C=C\C/C=C\C/C=C\CC	20	20	0.50332	0.849737	0.122468	-0.479477	0.916506	0.199974
	ONLI_0383	TAG 47:2; TAG 14:0-16:1-17:1;	CSHPOS	TXTUHJQIYSFKNK-YWVGYDOYSA-N	138268019	CCCCCCCCCCCCCC(=O)OCC(COC(=O)CCCCC/C=C\CCCCCCCCC)OC(=O)CCCCC/C=C\CCCCCCCC	19	20	0.744437	2.23e-05	5.52e-05	0.994955	3.04602	0.000193048
	ONLI_0384	TAG 55:3; TAG 18:1-18:2-19:0;	CSHPOS	UAIFODZHZUTFRI-RUAITIBSSA-N	138268805	CCCCCCCCCCCCCCCCCCC(=O)OCC(COC(=O)CCCCCCCCC/C=C\CCCCCC)OC(=O)CCCCCCCC/C=C\C=C/CCCCC	20	20	0.998671	0.998675	4.43e-06	1.26602	2.52236	1.97e-05
	ONLI_0385	LPC 20:0	CSHPOS	UATOAILWGVYRQS-HHHXNRCGSA-N	24779473	CCCCCCCCCCCCCCCCCCCC(=O)OC[C@H](COP(=O)([O-])OCC[N+](C)(C)C)O	20	20	0.260802	0.260802	2.77e-10	1.56185	4.69806	6.19e-09
	ONLI_0386	TAG 52:4; TAG 16:0-18:2-18:2;	CSHPOS	LXAWUIOWWNQCQA-QOFSRLOCSA-N	97042228	CCCCCCCCCCCCCCCC(=O)OC[C@@H](COC(=O)CCCCCCC/C=C\C/C=C\CCCCC)OC(=O)CCCCCCC/C=C\C/C=C\CCCCC	20	20	0.985114	0.997866	0.00267351	0.892857	1.48771	0.00640529
	ONLI_0387	TAG 53:2; TAG 17:0-18:1-18:1;	CSHPOS	ANBFFIILUQJIQL-AWWAHHQNSA-N	131802077	CCCCCCCCCCCCCCCCC(=O)OC[C@@H](COC(=O)CCCCCCC/C=C\CCCCCCCC)OC(=O)CCCCCCC/C=C\CCCCCCCC	20	20	0.712798	0.965518	0.000139356	1.0939	2.17552	0.000426545
	ONLI_0388	TAG 40:0; TAG 12:0-14:0-14:0;	CSHPOS	UGBCBXMLXHJYBS-UHFFFAOYSA-N	5127847	CCCCCCCCCCCCCC(=O)OCC(COC(=O)CCCCCCCCCCC)OC(=O)CCCCCCCCCCCCC	20	20	0.726614	0.964409	0.55014	-0.18802	0.983643	0.658043
	ONLI_0389	TAG 52:2; TAG 16:0-18:0-18:2;	CSHPOS	MDCUASFVKLEFPW-NXNLMSDJSA-N	131750341	CCCCCCCCCCCCCCCCCC(=O)O[C@@H](COC(=O)CCCCCCCCCCCCCCC)COC(=O)CCCCCCC/C=C\C/C=C\CCCCC	20	20	0.914396	0.838911	0.00319218	0.878511	2.05331	0.00752256
	ONLI_0390	LPC 22:0	CSHPOS	UIINDYGXBHJQHX-GDLZYMKVSA-N	24779479	CCCCCCCCCCCCCCCCCCCCCC(=O)OC[C@H](COP(=O)([O-])OCC[N+](C)(C)C)O	20	20	0.996107	0.612541	5.38e-09	1.49144	1.57012	4.98e-08
	ONLI_0391	PC 16:0-14:0	CSHPOS	UIXXHROAQSBBOV-PSXMRANNSA-N	24778679	CCCCCCCCCCCCCCCC(=O)OC[C@H](COP(=O)([O-])OCC[N+](C)(C)C)OC(=O)CCCCCCCCCCCCC	20	19	0.999535	0.999884	9.58e-06	1.20681	1.27734	3.85e-05
	ONLI_0392	PC 35:3; PC 17:1-18:2;	CSHPOS	UJXPBTXUYBVHBS-SMHLTHDGSA-N	52922545	CCCCCCC/C=C\CCCCCCCC(=O)OC[C@H](COP(=O)([O-])OCC[N+](C)(C)C)OC(=O)CCCCCCC/C=C\C/C=C\CCCCC	19	20	0.196543	0.391702	0.753734	0.0948249	1.03194	0.825518
	ONLI_0393	TAG 48:1; TAG 14:0-16:0-18:1;	CSHPOS	UPTISBGEYYYCRS-DLOIZKPKSA-N	131753274	CCCCCCCCCCCCCCCC(=O)O[C@@H](COC(=O)CCCCCCCCCCCCC)COC(=O)CCCCCCCCC/C=C\CCCCCC	20	20	0.99991	0.942406	0.000128785	1.09847	2.64289	0.000398739
	ONLI_0394	PCo-40:5	CSHPOS	UWNFEVACEPZILS-RNNLSGHUSA-N	52924022	CCCCCCCCCCCCCCCCCC/C=C\OC[C@H](COP(=O)([O-])OCC[N+](C)(C)C)OC(=O)CCC/C=C\C/C=C\C/C=C\C/C=C\CCCCC	20	20	0.999519	0.966099	0.0056674	0.829776	1.24885	0.0125682
	ONLI_0395	SM d40:3; SM d15:3/25:0;	CSHPOS	0	NA	0	20	20	0.260802	0.260802	2.77e-10	1.56185	2.45079	6.19e-09
	ONLI_0396	PC34:3 A	CSHPOS	VKVSSDKCKXJFIM-AFYHZPHLSA-N	52923213	CCCCCCCCCCCCCC(=O)O[C@H](COC(=O)CCCCCC/C=C\C/C=C\C/C=C\CCCCC)COP(=O)([O-])OCC[N+](C)(C)C	20	20	0.260802	0.260802	2.77e-10	1.56185	2.77047	6.19e-09
	ONLI_0397	Lyso-PAF C-16	CSHPOS	VLBPIWYTPAXCFJ-XMMPIXPASA-N	162126	CCCCCCCCCCCCCCCCOC[C@H](COP(=O)([O-])OCC[N+](C)(C)C)O	20	20	0.260802	0.260802	2.77e-10	1.56185	1.61166	6.19e-09
	ONLI_0398	TAG 60:12; TAG 16:0-22:6-22:6;	CSHPOS	VLEDHTUUVAXNOJ-WJBWTTGGSA-N	131755689	CCCCCCCCCCCCCCCC(=O)OC[C@@H](COC(=O)CC/C=C\C/C=C\C/C=C\C/C=C\C/C=C\C/C=C\CC)OC(=O)CC/C=C\C/C=C\C/C=C\C/C=C\C/C=C\C/C=C\CC	20	20	0.814732	0.994568	0.738799	-0.105091	0.933957	0.816941
	ONLI_0399	CE (22:6)	CSHPOS	VOEVEGPMRIYYKC-IWVSHIRDSA-N	53477890	CC/C=C\C/C=C\C/C=C\C/C=C\C/C=C\C/C=C\CCC(=O)O[C@H]1CC[C@@]2(C3CC[C@]4(C(C3CC=C2C1)CCC4[C@H](C)CCCC(C)C)C)C	19	20	0.745889	0.927655	0.0603606	0.554593	1.30793	0.105402
	ONLI_0400	TAG 58:8; TAG 18:1-18:1-22:6;	CSHPOS	VULLTLRIKFDMHX-IPUZCYPISA-N	131760077	CCCCCC/C=C\CCCCCCCCCC(=O)OC[C@@H](COC(=O)CC/C=C\C/C=C\C/C=C\C/C=C\C/C=C\C/C=C\CC)OC(=O)CCCCCCCCC/C=C\CCCCCC	20	20	0.99111	0.786477	0.547385	0.189314	1.0707	0.656699
	ONLI_0401	PCp-38:2 or PC o-38:3	CSHPOS	VXNFJZDUQIFCMO-WCXGAVHKSA-N	53480813	CCCCCCCC/C=C\CCCCCCCCCC(=O)O[C@H](CO/C=C\CCCCCC/C=C\CCCCCCCC)COP(=O)([O-])OCC[N+](C)(C)C	20	20	0.9912	0.939893	8.66e-05	1.12096	1.51763	0.000280991
	ONLI_0402	LPC 14:0	CSHPOS	VXUOFDJKYGDUJI-OAQYLSRUSA-N	460604	CCCCCCCCCCCCCC(=O)OC[C@H](COP(=O)([O-])OCC[N+](C)(C)C)O	20	20	0.999657	0.999752	0.993324	0.0026392	1.00727	0.994116
	ONLI_0403	PC 36:3e; PC 16:0e/20:3;	CSHPOS	VYKSGWCIVDQIQR-MEAIPJDCSA-N	16759365	CCCCCCCCCCCCCCCCOC[C@H](COP(=O)([O-])OCC[N+](C)(C)C)OC(=O)CCCCCC/C=C\C/C=C\C/C=C\CCCCC	20	20	0.952117	0.768542	3.18e-09	1.50492	1.59115	3.2e-08
	ONLI_0404	LPC p-18:0	CSHPOS	WBOMIOWRFSPZMC-AYICAFKVSA-N	24779527	CCCCCCCCCCCCCCCC/C=C\OC[C@H](COP(=O)([O-])OCC[N+](C)(C)C)O	19	20	0.673961	0.946574	0.00389713	0.825406	1.13284	0.00896339
	ONLI_0405	TAG 49:2; TAG 15:0-16:0-18:2;	CSHPOS	DDWAXVHDVUVXSQ-ZDFZEWNHSA-N	131754166	CCCCCCCCCCCCCCCC(=O)O[C@@H](COC(=O)CCCCCCCCCCCCCC)COC(=O)CCCCCCC/C=C\C/C=C\CCCCC	20	20	0.866278	0.907155	0.000152698	1.08856	2.17173	0.000462112
	ONLI_0406	TAG 58:6; TAG 18:1-18:2-22:3;	CSHPOS	WCIIIQSFALPOGU-CIRMXUQZSA-N	138286297	CCCCCC/C=C\CCCCCCCCCC(=O)OCC(COC(=O)CCCCCCCCCCC/C=C\C/C=C\C/C=C\CC)OC(=O)CCCCCCCC/C=C\C=C/CCCCC	20	20	0.958391	0.524427	0.00036335	1.03547	1.79257	0.00105594
	ONLI_0407	TAG 56:9; TAG 16:1-18:2-22:6;	CSHPOS	NPWRXJYSKONMPV-SRVQGIHESA-N	131759576	CCCCCC/C=C\CCCCCCCC(=O)OC[C@@H](COC(=O)CC/C=C\C/C=C\C/C=C\C/C=C\C/C=C\C/C=C\CC)OC(=O)CCCCCCC/C=C\C/C=C\CCCCC	20	19	0.62988	0.625478	0.00643823	0.803356	1.32932	0.014122
	ONLI_0408	LPC 18:3	CSHPOS	WKQNRCYKYCKESD-YVHLTTHBSA-N	24779469	CC/C=C\C/C=C\C/C=C\CCCCCCCC(=O)OC[C@H](COP(=O)([O-])OCC[N+](C)(C)C)O	19	20	0.795448	0.945414	0.00400194	0.823276	1.20965	0.00917824
	ONLI_0409	TAG 54:5; TAG 16:0-18:1-20:4;	CSHPOS	WKSLEDJKCJNITP-AHQIBYCWSA-N	131755177	CCCCCCCCCCCCCCCC(=O)OC[C@@H](COC(=O)CCC/C=C\C/C=C\C/C=C\C/C=C\CCCCC)OC(=O)CCCCCCCCC/C=C\CCCCCC	20	20	0.971519	0.992877	0.0808619	0.539579	1.1628	0.138498
	ONLI_0410	N-Nervonoyl-D-erythro-sphingosylphosphorylcholine	CSHPOS	WKZHECFHXLTOLJ-QYKFWSDSSA-N	44260126	CCCCCCCCCCCCC/C=C/[C@H]([C@H](COP(=O)([O-])OCC[N+](C)(C)C)NC(=O)CCCCCCCCCCCCC/C=C\CCCCCCCC)O	20	20	0.814534	0.98511	0.0384368	0.634681	1.1903	0.0706429
	ONLI_0411	TAG 58:8; TAG 18:0-18:2-22:6;	CSHPOS	HHLFQZIIXPUFCA-KIZDZYDBSA-N	131756104	CCCCCCCCCCCCCCCCCC(=O)OC[C@@H](COC(=O)CC/C=C\C/C=C\C/C=C\C/C=C\C/C=C\C/C=C\CC)OC(=O)CCCCCCC/C=C\C/C=C\CCCCC	20	20	0.567267	0.877641	0.283248	-0.335856	0.860265	0.398627
	ONLI_0412	TAG 56:3; TAG 14:0-20:0-22:3;	CSHPOS	WOXDUJQRLLENEU-JYISLEBKSA-N	138290251	CCCCCCCCCCCCCCCCCCCC(=O)OC(COC(=O)CCCCCCCCCCCCC)COC(=O)CCCCCCCCCCC/C=C\C/C=C\C/C=C\CC	20	20	0.982615	0.67397	8.3e-09	1.47994	3.53361	7.11e-08
	ONLI_0413	TAG 53:4; TAG 16:0-17:0-20:4;	CSHPOS	WQFNYIJLJYJWKK-BNJGEZIZSA-N	134776734	CCCCCCCCCCCCCCCCC(=O)O[C@H](COC(=O)CCCCCCCCCCCCCCC)COC(=O)CCC/C=C/C/C=C/C/C=C/C/C=C/CCCCC	20	20	0.999611	0.876855	9.22e-05	1.11745	1.76641	0.000295674
	ONLI_0414	PCp-42:3 or PC o-42:4	CSHPOS	CQZWFFADRVQCKP-SANZOQRGSA-N	52929632	CCCCCCCCCCCCCCCCCCCCOC[C@H](COP(=O)(O)O)OC(=O)CCCCC/C=C\C/C=C\C/C=C\C/C=C\CCCCC	20	20	0.913711	0.785029	0.226036	0.378129	1.13921	0.331437
	ONLI_0415	TAG 51:5; TAG 15:0-18:2-18:3;	CSHPOS	VEGWTLAYXMHOLL-HHBBQONFSA-N	131754537	CCCCCCCCCCCCCCC(=O)OC[C@@H](COC(=O)CCCCCCC/C=C\C/C=C\C/C=C\CC)OC(=O)CCCCCCC/C=C\C/C=C\CCCCC	20	20	0.998762	0.846239	0.000516426	1.01257	1.95201	0.0014286
	ONLI_0416	PC34:1	CSHPOS	WTJKGGKOPKCXLL-VYOBOKEXSA-N	5497103	CCCCCCCCCCCCCCCC(=O)OC[C@H](COP(=O)([O-])OCC[N+](C)(C)C)OC(=O)CCCCCCC/C=C\CCCCCCCC	20	20	0.987158	0.916319	1.46e-08	1.46451	2.14657	1.12e-07
	ONLI_0417	LPC 19:0	CSHPOS	WYIMORDZGCUBAA-AREMUKBSSA-N	24779472	CCCCCCCCCCCCCCCCCCC(=O)OC[C@H](COP(=O)([O-])OCC[N+](C)(C)C)O	20	20	0.260802	0.260802	2.77e-10	1.56185	2.0844	6.19e-09
	ONLI_0418	TAG 54:8; TAG 18:2-18:3-18:3;	CSHPOS	IMPMCCKWZKDAGE-GLLBNYCSSA-N	97161142	CCCCC/C=C\C/C=C\CCCCCCCC(=O)OC[C@@H](COC(=O)CCCCCCC/C=C\C/C=C\C/C=C\CC)OC(=O)CCCCCCC/C=C\C/C=C\C/C=C\CC	20	20	0.887459	0.900527	0.0223592	0.696049	1.8742	0.0440077
	ONLI_0419	TAG 58:11; TAG 18:2-18:3-22:6;	CSHPOS	CCWQXSQVMPACON-RXTLCQEBSA-N	131763405	CCCCC/C=C\C/C=C\CCCCCCCC(=O)OC[C@@H](COC(=O)CC/C=C\C/C=C\C/C=C\C/C=C\C/C=C\C/C=C\CC)OC(=O)CCCCCCC/C=C\C/C=C\C/C=C\CC	20	20	0.947802	0.999413	0.831869	-0.0669416	0.989442	0.889315
	ONLI_0420	Lyso-PC o-18	CSHPOS	XKBJVQHMEXMFDZ-AREMUKBSSA-N	2733532	CCCCCCCCCCCCCCCCCCOC[C@H](COP(=O)([O-])OCC[N+](C)(C)C)O	20	20	0.958064	0.984364	0.0453748	0.614657	1.08268	0.0813513
	ONLI_0421	CE ( 24:1)	CSHPOS	PUKCXSHDVCMMAN-FYGHJIOESA-N	53477888	CCCCCCCC/C=C\CCCCCCCCCCCCCC(=O)O[C@H]1CC[C@@]2([C@H]3CC[C@]4([C@H]([C@@H]3CC=C2C1)CC[C@@H]4[C@H](C)CCCC(C)C)C)C	20	20	0.00367589	0.00123308	0.675259	0.114535	1.20417	0.76561
	ONLI_0422	TAG 56:7; TAG 16:0-18:2-22:5;	CSHPOS	RUFOURHRNYZYIN-LCRTUSODSA-N	131755334	CCCCCCCCCCCCCCCC(=O)OC[C@@H](COC(=O)CCCCC/C=C\C/C=C\C/C=C\C/C=C\C/C=C\CC)OC(=O)CCCCCCC/C=C\C/C=C\CCCCC	20	20	0.986187	0.996198	0.266485	0.347602	1.07227	0.381709
	ONLI_0423	TAG 56:5; TAG 18:1-18:2-20:2;	CSHPOS	HLTNSFGECJJVPF-SGFVPPCASA-N	131760192	CCCCCC/C=C\CCCCCCCCCC(=O)OC[C@@H](COC(=O)CCCCCCCCC/C=C\C/C=C\CCCCC)OC(=O)CCCCCCC/C=C\C/C=C\CCCCC	20	20	0.99955	0.990042	9.1e-06	1.23424	2.30133	3.7e-05
	ONLI_0424	TAG 56:9; TAG 16:0-20:4-20:5;	CSHPOS	XOJDXSDPICSSTA-FXRJZKPYSA-N	131755442	CCCCCCCCCCCCCCCC(=O)OC[C@@H](COC(=O)CCC/C=C\C/C=C\C/C=C\C/C=C\C/C=C\CC)OC(=O)CCC/C=C\C/C=C\C/C=C\C/C=C\CCCCC	20	20	0.787936	0.996987	0.000441647	1.02286	1.50218	0.00126073
	ONLI_0425	CE ( 22:5)	CSHPOS	XOLZNHXNFMEUGA-DCDLNIKOSA-N	42608400	CC/C=C\C/C=C\C/C=C\C/C=C\C/C=C\CCCCCC(=O)O[C@H]1CC[C@@]2([C@H]3CC[C@]4([C@H]([C@@H]3CC=C2C1)CC[C@@H]4[C@H](C)CCCC(C)C)C)C	20	20	0.92324	0.996241	0.00531299	0.835443	1.94429	0.0118475
	ONLI_0426	DAG 38:6; DAG 18:2-20:4;	CSHPOS	XQKXAZZSUMABAU-HKOSRXLCSA-N	53478108	CCCCC/C=C\C/C=C\CCCCCCCC(=O)OC[C@H](CO)OC(=O)CCCCCC/C=C\C/C=C\C/C=C\C/C=C\CC	20	20	0.999997	0.952496	7.07e-06	1.24561	1.42932	2.96e-05
	ONLI_0427	LPC 20:3 b	CSHPOS	XUDGAAFUMTTZCO-QNEBEIHSSA-N	138300357	CC/C=C\C/C=C\C/C=C\CCCCCCCCCC(=O)OCC(COP(=O)([O-])OCC[N+](C)(C)C)O	20	20	0.771239	0.707347	0.00298383	0.884009	1.40967	0.00710647
	ONLI_0428	PCo-40:7 A	CSHPOS	XUVCLJCZWPTAIO-OAKHYACESA-N	53479405	CCCCCCCC/C=C\CCCCCC/C=C\OC(COC(=O)CCCCC/C=C\C/C=C\C/C=C\C/C=C\C/C=C\CC)COP(=O)([O-])OCC[N+](C)(C)C	20	20	0.945337	0.230871	6.18e-09	1.48782	1.61046	5.59e-08
	ONLI_0429	PC 36:6; PC 18:3-18:3;	CSHPOS	XXKFQTJOJZELMD-JICBSJGISA-N	24778990	CC/C=C\C/C=C\C/C=C\CCCCCCCC(=O)OC[C@H](COP(=O)([O-])OCC[N+](C)(C)C)OC(=O)CCCCCCC/C=C\C/C=C\C/C=C\CC	20	20	0.894317	0.782265	1.39e-06	1.3134	1.74672	6.92e-06
	ONLI_0430	TAG 58:9; TAG 18:2-18:2-22:5;	CSHPOS	DNOZVMIUNWBFHO-OIANEIKYSA-N	131750598	CCCCC/C=C\C/C=C\CCCCCCCC(=O)OC[C@@H](COC(=O)CCCCC/C=C\C/C=C\C/C=C\C/C=C\C/C=C\CC)OC(=O)CCCCCCC/C=C\C/C=C\CCCCC	20	20	0.802048	0.734409	0.10878	-0.497244	0.845091	0.1813
	ONLI_0432	CE (20:5)	CSHPOS	XZFUGMCJZFRBKF-JIKDAPOUSA-N	53477889	CC/C=C\C/C=C\C/C=C\C/C=C\C/C=C\CCCC(=O)O[C@H]1CC[C@@]2(C3CC[C@]4(C(C3CC=C2C1)CCC4[C@H](C)CCCC(C)C)C)C	20	20	0.868655	0.570552	0.0126714	0.75472	1.56623	0.0262224
	ONLI_0433	LPC 18:1	CSHPOS	YAMUFBLWGFFICM-PTGWMXDISA-N	16081932	CCCCCCCC/C=C\CCCCCCCC(=O)OC[C@H](COP(=O)([O-])OCC[N+](C)(C)C)O	20	20	0.756803	0.604107	0.00248258	0.898759	1.32422	0.00598348
	ONLI_0434	TAG 47:1; TAG 15:0-16:0-16:1;	CSHPOS	RCYIETYFTUBXFK-KWLHUJJFSA-N	131754159	CCCCCCCCCCCCCCCC(=O)O[C@@H](COC(=O)CCCCCCCCCCCCCC)COC(=O)CCCCCCC/C=C\CCCCCC	19	20	0.628615	0.687426	0.00344918	0.824534	2.04611	0.0080017
	ONLI_0435	PE36:2	CSHPOS	ZTSRQLQWGSDQGP-RTJYTIBZSA-N	53479650	CCCCCCCC/C=C\CCCCCCCC(=O)OC[C@H](COP(=O)(O)OCCN)OC(=O)CCCCCCCCC/C=C\CCCCCC	20	20	0.964018	0.530943	1.34e-07	1.39722	2.2697	8.31e-07
	ONLI_0436	DAG 34:1; DAG 16:0-18:1;	CSHPOS	YEJYLHKQOBOSCP-OZKTZCCCSA-N	5282283	CCCCCCCCCCCCCCCC(=O)OC[C@H](CO)OC(=O)CCCCCCC/C=C\CCCCCCCC	20	20	0.99982	0.999968	6.51e-06	1.24925	1.58908	2.74e-05
	ONLI_0437	TAG 54:3; TAG 18:0-18:1-18:2;	CSHPOS	TVLMJMFKNWRCGI-HIAAHSCQSA-N	131755942	CCCCCCCCCCCCCCCCCC(=O)OC[C@@H](COC(=O)CCCCCCC/C=C\C/C=C\CCCCC)OC(=O)CCCCCCCCC/C=C\CCCCCC	20	20	0.610383	0.646202	0.00233579	0.903575	1.87269	0.00566359
	ONLI_0438	TAG 56:5; TAG 18:0-18:1-20:4;	CSHPOS	YGKXJDDGNQKJPT-COCAYHFYSA-N	131755946	CCCCCCCCCCCCCCCCCC(=O)OC[C@@H](COC(=O)CCC/C=C\C/C=C\C/C=C\C/C=C\CCCCC)OC(=O)CCCCCCCCC/C=C\CCCCCC	19	20	0.781127	0.681144	0.248973	0.345539	1.26334	0.360473
	ONLI_0439	PC 16:0/o-20:5	CSHPOS	YHSSHPWVFALMBA-IARQOZKNSA-N	10485310	CCCCCCCCCCCCCCCCOC[C@H](COP(=O)([O-])OCC[N+](C)(C)C)OC(=O)CCC/C=C\C/C=C\C/C=C\C/C=C\C/C=C\CC	20	20	0.369687	0.971843	0.0272912	0.67414	1.14653	0.0521838
	ONLI_0440	SMd34:2	CSHPOS	OAHFTKWSJGVMTG-MBIABJCFSA-N	52931145	CCCCCCCCCCCCC/C=C/[C@H]([C@H](COP(=O)([O-])OCC[N+](C)(C)C)NC(=O)CCCCCCC/C=C\CCCCCC)O	20	20	0.93076	0.735587	3.13e-09	1.50534	1.5181	3.19e-08
	ONLI_0441	AC 8:1	CSHPOS	LOSHAHDSFZXVCT-LXKVQUBZSA-N	70679121	CCCCC/C=C/C(=O)O[C@@H](CC(=O)[O-])C[N+](C)(C)C	19	20	0.936905	0.994433	0.39783	-0.254485	1.01201	0.517372
	ONLI_0442	PCo-38:5 A	CSHPOS	YPAPIRJFGNBODV-AMFPDOHCSA-N	53480715	CCCCCCCCCCCCCCCC/C=C\OCC(COP(=O)([O-])OCC[N+](C)(C)C)OC(=O)CCCCCC/C=C\C/C=C\C/C=C\C/C=C\CC	20	20	0.959803	0.813489	1.51e-07	1.3933	1.38767	9.21e-07
	ONLI_0443	PE 34:0; PE 17:0-17:0;	CSHPOS	YSFFAUPDXKTJMR-DIPNUNPCSA-N	46891875	CCCCCCCCCCCCCCCCC(=O)OC[C@H](COP(=O)(O)OCCN)OC(=O)CCCCCCCCCCCCCCCC	20	20	0.952472	0.975263	0.204229	0.39616	1.0286	0.306154
	ONLI_0445	PC 39:5; PC 19:0-20:5;	CSHPOS	YTUVRFVITPTFSM-ZDQXWTFCSA-N	52922977	CCCCCCCCCCCCCCCCCCC(=O)OC[C@H](COP(=O)([O-])OCC[N+](C)(C)C)OC(=O)CCC/C=C\C/C=C\C/C=C\C/C=C\C/C=C\CC	20	20	0.260802	0.260802	2.77e-10	1.56185	3.20631	6.19e-09
	ONLI_0446	TAG 51:0; TAG 16:0-17:0-18:0;	CSHPOS	YVLSJEQNDDKMQI-UHFFFAOYSA-N	138309104	CCCCCCCCCCCCCCCCCC(=O)OCC(COC(=O)CCCCCCCCCCCCCCC)OC(=O)CCCCCCCCCCCCCCCC	20	20	0.82278	0.135598	0.115679	0.469547	1.4299	0.190822
	ONLI_0447	LPE 16:0	CSHPOS	YVYMBNSKXOXSKW-HXUWFJFHSA-N	9547069	CCCCCCCCCCCCCCCC(=O)OC[C@H](COP(=O)(O)OCCN)O	20	20	0.634304	0.609237	0.0289518	0.667502	1.13417	0.055228
	ONLI_0448	PC34:4	CSHPOS	YWDDIWXKFJEMKF-JTZVLWBESA-N	52922891	CCCCCCCCCCCCCCCC(=O)O[C@H](COC(=O)CCCC/C=C\C/C=C\C/C=C\C/C=C\CC)COP(=O)([O-])OCC[N+](C)(C)C	20	20	0.968423	0.438272	8.57e-06	1.23696	1.56634	3.54e-05
	ONLI_0449	SMd39:1	CSHPOS	YXSZOBWVQJIWNE-QVDCKBILSA-N	52931193	CCCCCCCCCCCCCCCCCCCCC(=O)N[C@@H](COP(=O)([O-])OCC[N+](C)(C)C)[C@@H](/C=C/CCCCCCCCCCCCC)O	20	20	0.260802	0.260802	2.77e-10	1.56185	2.38787	6.19e-09
	ONLI_0450	LPC 20:2	CSHPOS	YYQVCMMXPIJVHY-ZOIJLGJPSA-N	52924053	CCCCC/C=C\C/C=C\CCCCCCCCCC(=O)OC[C@H](COP(=O)([O-])OCC[N+](C)(C)C)O	20	20	0.999924	0.998168	8.82e-05	1.11993	1.36303	0.000283942
	ONLI_0451	LPC 20:1	CSHPOS	YYSFWGQAKJTHRE-MEOKJUQFSA-N	52924051	CCCCCCCC/C=C\CCCCCCCCCC(=O)OC[C@H](COP(=O)([O-])OCC[N+](C)(C)C)O	20	20	0.260802	0.260802	2.77e-10	1.56185	2.37419	6.19e-09
	ONLI_0452	TAG 62:2; TAG 18:2-22:0-22:0;	CSHPOS	VPZZYXWJCZKULK-CUUCRUSKSA-N	9545738	CCCCCCCCCCCCCCCCCCCCCC(=O)OC[C@@H](COC(=O)CCCCCCC/C=C\C/C=C\CCCCC)OC(=O)CCCCCCCCCCCCCCCCCCCCC	19	20	0.226763	0.00285312	0.00520786	0.727942	2.54887	0.0116454
	ONLI_0453	Cer d42:1	CSHPOS	ZJVVOYPTFQEGPH-AUTSUKAISA-N	5283571	CCCCCCCCCCCCCCCCCCCCCCCC(=O)N[C@@H](CO)[C@@H](/C=C/CCCCCCCCCCCCC)O	20	19	0.998613	0.993948	4.89e-05	1.10156	1.39138	0.000174848
	ONLI_0454	TAG 50:1; TAG 16:0-16:0-18:1;	CSHPOS	ZKEWGTVAIGJNBK-ZMSSUMMHSA-N	131750533	CCCCCCCCCCCCCCCC(=O)OC[C@@H](COC(=O)CCCCCCCCC/C=C\CCCCCC)OC(=O)CCCCCCCCCCCCCCC	20	20	0.882036	0.768111	0.0046591	0.84682	1.96081	0.0105353
	ONLI_0455	TAG 52:6; TAG 16:1-18:2-18:3;	CSHPOS	NOOJQDXMGLPOOA-UJLFLSCOSA-N	131759571	CCCCCC/C=C\CCCCCCCC(=O)OC[C@@H](COC(=O)CCCCCCC/C=C\C/C=C\C/C=C\CC)OC(=O)CCCCCCC/C=C\C/C=C\CCCCC	20	20	0.999997	0.996125	5.93e-06	1.25339	2.10783	2.54e-05
	ONLI_0456	TAG 44:0; TAG 12:0-14:0-18:0;	CSHPOS	ZPXAKNNNRATWOJ-UHFFFAOYSA-N	138315726	CCCCCCCCCCCCCCCCCC(=O)OCC(COC(=O)CCCCCCCCCCC)OC(=O)CCCCCCCCCCCCC	19	20	0.498791	0.885179	0.11126	0.473426	1.30023	0.184289
	ONLI_0457	PEo-38:5	CSHPOS	ZTZQZGHJLWFLFQ-VZBWJDOASA-N	53480855	CCCCCCCCCCCCCCCC/C=C\OC[C@H](COP(=O)(O)OCCN)OC(=O)CCCCCC/C=C\C/C=C\C/C=C\C/C=C\CC	19	20	0.7202	0.794589	0.165734	-0.413761	0.916609	0.256076
	ONLI_0458	TAG 60:11; TAG 18:2-20:4-22:5;	CSHPOS	CJMQGODMMNFMOQ-ORXARHRGSA-N	131763346	CCCCC/C=C\C/C=C\CCCCCCCC(=O)OC[C@@H](COC(=O)CCCCC/C=C\C/C=C\C/C=C\C/C=C\C/C=C\CC)OC(=O)CCC/C=C\C/C=C\C/C=C\C/C=C\CCCCC	20	20	0.887578	0.979389	0.00835908	-0.794595	0.800746	0.0180889
	ONLI_0471	FA 11:0	CSHNEG	ZDPHROOEEOARMN-UHFFFAOYSA-N	8180	CCCCCCCCCCC(=O)O	20	20	0.968832	0.971842	0.543259	-0.191258	0.909517	0.653597
	ONLI_0473	FA 13:0	CSHNEG	SZHOJFHSIKHZHA-UHFFFAOYSA-N	12530	CCCCCCCCCCCCC(=O)O	20	20	0.998063	0.985809	0.741764	-0.103855	0.930238	0.817973
	ONLI_0474	FA 14:1	CSHNEG	AFGUVBVUFZMJMX-KTKRTIGZSA-N	5312400	CCCCCCCC/C=C\CCCC(=O)O	20	20	0.995377	0.99979	0.838674	0.0641948	1.0255	0.894216
	ONLI_0475	FA 15:1	CSHNEG	DJCQJZKZUCHHAL-VOTSOKGWSA-N	6365140	CCCCC/C=C/CCCCCCCC(=O)O	20	20	0.630247	0.982266	0.507956	0.208194	0.937479	0.621435
	ONLI_0476	FA 15:0	CSHNEG	WQEPLUUGTLDZJY-UHFFFAOYSA-N	13849	CCCCCCCCCCCCCCC(=O)O	20	20	0.999474	0.999538	0.942819	0.0226223	0.984065	0.958294
	ONLI_0477	FA 16:1	CSHNEG	SECPZKHBENQXJG-FPLPWBNLSA-N	445638	CCCCCC/C=C\CCCCCCCC(=O)O	20	20	0.992058	0.921147	0.0910299	0.523017	1.36941	0.154272
	ONLI_0478	FA 17:0	CSHNEG	KEMQGTRYUADPNZ-UHFFFAOYSA-N	10465	CCCCCCCCCCCCCCCCC(=O)O	19	20	0.820121	0.989165	0.0167844	0.695829	1.14026	0.0337787
	ONLI_0479	FA 18:3	CSHNEG	DTOSIQBPPRVQHS-PDBXOOCHSA-N	5280934	CC/C=C\C/C=C\C/C=C\CCCCCCCC(=O)O	20	20	0.822878	0.920322	0.358567	0.287948	1.06484	0.479829
	ONLI_0480	FA 18:2	CSHNEG	JBYXPOFIGCOSSB-GOJKSUSPSA-N	5280644	CCCCCC/C=C/C=C\CCCCCCCC(=O)O	20	20	0.683728	0.979124	0.70465	-0.119439	0.941727	0.791135
	ONLI_0481	FA 18:1	CSHNEG	ZQPPMHVWECSIRJ-KTKRTIGZSA-N	445639	CCCCCCCC/C=C\CCCCCCCC(=O)O	20	20	0.999654	0.999927	0.59344	-0.16806	0.930252	0.69537
	ONLI_0483	FA 20:5	CSHNEG	JAZBEHYOTPTENJ-JLNKQSITSA-N	446284	CC/C=C\C/C=C\C/C=C\C/C=C\C/C=C\CCCC(=O)O	20	20	0.97685	0.912637	0.486394	-0.218829	0.859255	0.605971
	ONLI_0484	FA 20:4	CSHNEG	YZXBAPSDXZZRGB-DOFZRALJSA-N	444899	CCCCC/C=C\C/C=C\C/C=C\C/C=C\CCCC(=O)O	20	20	0.993181	0.999848	0.0010077	-0.966568	0.730782	0.00259999
	ONLI_0485	FA 20:3 a	CSHNEG	UNSRRHDPHVZAHH-YOILPLPUSA-N	5312531	CCCCCCCC/C=C\C/C=C\C/C=C\CCCC(=O)O	20	20	0.489009	0.744129	0.962347	0.0148894	0.956932	0.973701
	ONLI_0486	FA 20:3 b	CSHNEG	HOBAELRKJCKHQD-QNEBEIHSSA-N	5280581	CCCCC/C=C\C/C=C\C/C=C\CCCCCCC(=O)O	20	20	0.980785	0.996966	0.412459	0.25734	1.09264	0.528973
	ONLI_0487	FA 20:2	CSHNEG	XSXIVVZCUAHUJO-HZJYTTRNSA-N	6439848	CCCCC/C=C\C/C=C\CCCCCCCCCC(=O)O	20	20	0.995556	0.996548	0.152059	0.445628	1.17488	0.238624
	ONLI_0488	FA 20:1	CSHNEG	BITHHVVYSMSWAG-KTKRTIGZSA-N	5282768	CCCCCCCC/C=C\CCCCCCCCCC(=O)O	20	20	0.997626	0.923208	9.4e-07	1.32855	2.1026	4.85e-06
	ONLI_0489	FA 20:0	CSHNEG	VKOBVWXKNCXXDE-UHFFFAOYSA-N	10467	CCCCCCCCCCCCCCCCCCCC(=O)O	20	20	0.703377	0.999917	3.41e-06	1.27708	1.7012	1.57e-05
	ONLI_0491	FA 22:6	CSHNEG	MBMBGCFOFBJSGT-KUBAVDMBSA-N	445580	CC/C=C\C/C=C\C/C=C\C/C=C\C/C=C\C/C=C\CCC(=O)O	20	20	0.983167	0.609511	0.048889	-0.605448	0.744479	0.08707
	ONLI_0492	FA 22:2	CSHNEG	HVGRZDASOHMCSK-HZJYTTRNSA-N	5312554	CCCCC/C=C\C/C=C\CCCCCCCCCCCC(=O)O	20	20	0.681976	0.559054	8.49e-10	1.53686	2.88211	1.25e-08
	ONLI_0493	FA 22:1	CSHNEG	DPUOLQHDNGRHBS-KTKRTIGZSA-N	5281116	CCCCCCCC/C=C\CCCCCCCCCCCC(=O)O	20	20	0.922427	0.993349	1.52e-06	1.31004	1.52598	7.44e-06
	ONLI_0494	FA 22:0	CSHNEG	UKMSUNONTOPOIO-UHFFFAOYSA-N	8215	CCCCCCCCCCCCCCCCCCCCCC(=O)O	20	20	0.948928	0.999866	0.000591982	1.00344	1.37351	0.00161541
	ONLI_0495	FA 24:1	CSHNEG	GWHCXVQVJPWHRF-KTKRTIGZSA-N	5281120	CCCCCCCC/C=C\CCCCCCCCCCCCCC(=O)O	20	20	0.257073	0.820827	0.000272751	1.05355	1.45336	0.000807224
	ONLI_0496	FA 24:0	CSHNEG	QZZGJDVWLFXDLK-UHFFFAOYSA-N	11197	CCCCCCCCCCCCCCCCCCCCCCCC(=O)O	19	20	0.74246	0.948138	0.920159	0.030315	1.01897	0.947222
	ONLI_0497	FAHFA 24:0; FAHFA 16:0/8:0;	CSHNEG	JFADBWKNFGCNQI-UHFFFAOYSA-N	138184454	CCCCCCCCCCCCCCCC(=O)OC(CCC)CCCC(=O)O	20	19	0.979821	0.76873	0.766395	-0.0898059	0.941643	0.835987
	ONLI_0498	LPE P-16:0	CSHNEG	QYTPGOPLNFESQC-NUTQULCTSA-N	42607469	CCCCCCCCCCCCCC/C=C\OC[C@H](COP(=O)(O)OCCN)O	20	20	0.966876	0.969946	0.000469919	1.0188	1.24963	0.00132684
	ONLI_0503	LPE 20:4	CSHNEG	JPNPIRVRGLGTRE-YSKCIPFOSA-N	53480952	CC/C=C\C/C=C\C/C=C\C/C=C\CCCCCCC(=O)OC[C@H](COP(=O)(O)OCCN)O	20	20	0.988649	0.982585	0.869207	-0.0519265	0.959544	0.913462
	ONLI_0504	LPE 22:6	CSHNEG	XEVRBOQZSXWGQO-PAUXXPOVSA-N	52925132	CC/C=C\C/C=C\C/C=C\C/C=C\C/C=C\C/C=C\CCC(=O)OC[C@H](COP(=O)(O)OCCN)O	20	20	0.823782	0.671118	0.21844	0.384267	1.17952	0.32206
	ONLI_0505	LPE 22:5	CSHNEG	OSRWIBSZJTWIKA-SCFYABBUSA-N	53480955	CC/C=C\C/C=C\C/C=C\C/C=C\C/C=C\CCCCCC(=O)OC[C@H](COP(=O)(O)OCCN)O	19	19	0.999807	0.951674	9.61e-06	1.17305	2.12554	3.85e-05
	ONLI_0509	LPC 16:0	CSHNEG	ASWBNKHCZGQVJV-HSZRJFAPSA-N	460602	CCCCCCCCCCCCCCCC(=O)OC[C@H](COP(=O)([O-])OCC[N+](C)(C)C)O	20	20	0.997369	0.999957	0.000372642	1.03385	1.17728	0.00107618
	ONLI_0511	LPC 18:1	CSHNEG	PZRFVAHZNWPPAC-VBKSFVIKSA-N	53480465	CCCCCC/C=C\CCCCCCCCCC(=O)OC[C@H](COP(=O)([O-])OCC[N+](C)(C)C)O	20	20	0.982549	0.979325	0.0768435	0.546573	1.32843	0.132177
	ONLI_0512	LPC 17:0	CSHNEG	SRRQPVVYXBTRQK-XMMPIXPASA-N	24779463	CCCCCCCCCCCCCCCCC(=O)OC[C@H](COP(=O)([O-])OCC[N+](C)(C)C)O	20	20	0.999191	0.99033	0.129451	0.470984	1.03722	0.20842
	ONLI_0513	LPC 18:3	CSHNEG	WKQNRCYKYCKESD-YVHLTTHBSA-O	5313992	CC/C=C\C/C=C\C/C=C\CCCCCCCC(=O)OC[C@H](COP(=O)(O)OCC[N+](C)(C)C)O	19	19	0.941571	0.997302	5.1e-05	1.08733	1.29673	0.000181679
	ONLI_0516	LPC 18:0	CSHNEG	IHNKQIMGVNPMTC-RUZDIDTESA-N	497299	CCCCCCCCCCCCCCCCCC(=O)OC[C@H](COP(=O)([O-])OCC[N+](C)(C)C)O	20	20	0.891396	0.944878	0.0115424	-0.763879	0.891609	0.0243236
	ONLI_0518	LPI 18:2	CSHNEG	SAHCQBPGXQFTRA-FPKLTXOWSA-N	52928605	CCCCC/C=C\C/C=C\CCCCCCCC(=O)OC[C@H](COP(=O)(O)OC1C([C@@H](C(C(C1O)O)O)O)O)O	20	20	0.996133	0.995582	0.347372	-0.294643	0.887782	0.4684
	ONLI_0521	LPI 18:0	CSHNEG	MXAFDFDAIFZFET-DRPMWXDOSA-N	42607495	CCCCCCCCCCCCCCCCCC(=O)OC[C@H](COP(=O)(O)OC1C([C@@H](C(C(C1O)O)O)O)O)O	20	20	0.96982	0.842495	0.537421	0.194021	1.15703	0.648256
	ONLI_0522	LPC 20:5	CSHNEG	PDIGSOAOQOXRDU-WJPZTBRDSA-N	11757087	CC/C=C\C/C=C\C/C=C\C/C=C\C/C=C\CCCC(=O)OC[C@H](COP(=O)([O-])OCC[N+](C)(C)C)O	20	20	0.997999	0.988877	0.483744	-0.220152	0.952029	0.60468
	ONLI_0524	LPC 20:3 a	CSHNEG	BBNHCUBQEQJHIG-FZZJNMCHSA-N	52924055	CCCCC/C=C\C/C=C\C/C=C\CCCCCCC(=O)OC[C@H](COP(=O)([O-])OCC[N+](C)(C)C)O	20	20	0.779352	0.796785	0.00201386	0.915144	1.46815	0.00496849
	ONLI_0529	LPI 20:4	CSHNEG	LXUGKKVCSTYZFK-YPTWYXPQSA-N	42607497	CCCCC/C=C\C/C=C\C/C=C\C/C=C\CCCC(=O)OC[C@H](COP(=O)(O)OC1C([C@@H](C(C(C1O)O)O)O)O)O	20	20	0.999891	0.999804	0.00131481	-0.947294	0.660574	0.00332836
	ONLI_0530	Cer-NS d36:1; Cer-NS d18:1/18:0;	CSHNEG	VODZWWMEJITOND-NXCSZAMKSA-N	5283565	CCCCCCCCCCCCCCCCCC(=O)N[C@@H](CO)[C@@H](/C=C/CCCCCCCCCCCCC)O	19	20	0.382503	0.737179	2.92e-09	-1.50068	0.476959	3.14e-08
	ONLI_0531	LPC 22:5 a	CSHNEG	YBUXFQUGNPBZPS-YNBHEIDWSA-N	53480473	CCCCC/C=C\C/C=C\C/C=C\C/C=C\C/C=C\CCC(=O)OC[C@H](COP(=O)([O-])OCC[N+](C)(C)C)O	19	19	0.92972	0.990494	0.000139969	1.03808	1.58679	0.0004268
	ONLI_0535	Cer (d18:1(4E)/22:0)	CSHNEG	KEPQASGDXIEOIL-GLQCRSEXSA-N	5283567	CCCCCCCCCCCCCCCCCCCCCC(=O)N[C@@H](CO)[C@@H](/C=C/CCCCCCCCCCCCC)O	20	20	0.260802	0.260802	2.77e-10	1.56185	3.73135	6.19e-09
	ONLI_0536	Cer-NS d40:2; Cer-NS d18:2/22:0;	CSHNEG	FNIDWIWVIDQZRV-FDPIOYFLSA-N	52931120	CCCCCCCCCCCCCCCCCCCC(=O)N[C@@H](CO)[C@@H](/C=C/CCCCCCCC/C=C\CCC)O	20	20	0.260802	0.178546	2.27e-10	1.55789	6.52949	6.19e-09
	ONLI_0537	Cer (d18:1(4E)/23:0)	CSHNEG	NAJHAHQNQCNWOP-PUYNVXOJSA-N	52931115	CCCCCCCCCCCCCCCCCCCCCCC(=O)N[C@@H](CO)[C@@H](/C=C/CCCCCCCCCCCCC)O	20	20	0.753738	0.963724	0.674947	0.132115	1.03982	0.76561
	ONLI_0538	Cer-NS d41:2; Cer-NS d18:2/23:0;	CSHNEG	ZMECGTOWDUDJOX-YOFLLLADSA-N	52931124	CCCCCCCCCCCCCCCCCCCCCCC(=O)N[C@@H](CO)[C@@H](/C=C/CCCCCCCC/C=C\CCC)O	20	20	0.999999	0.980518	1.47e-07	1.39424	2.06043	9.02e-07
	ONLI_0539	PC 25:0; PC 12:0-13:0;	CSHNEG	FCTBVSCBBWKZML-WJOKGBTCSA-N	24778516	CCCCCCCCCCCCC(=O)O[C@H](COC(=O)CCCCCCCCCCC)COP(=O)([O-])OCC[N+](C)(C)C	20	20	0.948871	0.922445	0.0433599	0.6202	1.06304	0.0783773
	ONLI_0541	Cer-NDS d41:0; Cer-NDS d18:0/23:0;	CSHNEG	FTSDYFFYZJTACJ-IOLBBIBUSA-N	53481049	CCCCCCCCCCCCCCCCCCCCCCC(=O)N[C@@H](CO)[C@@H](CCCCCCCCCCCCCCC)O	20	20	0.997448	0.964024	0.527352	0.19882	1.13592	0.638373
	ONLI_0542	Cer-NP t40:0; Cer-NP t18:0/22:0;	CSHNEG	CIMNZQFRNXDRER-HIERITDVSA-N	5322153	CCCCCCCCCCCCCCCCCCCCCC(=O)N[C@@H](CO)[C@@H]([C@@H](CCCCCCCCCCCCCC)O)O	20	20	0.866942	0.418701	0.00111296	0.959437	1.47075	0.00284424
	ONLI_0543	Cer-NS d42:3; Cer-NS d18:2/24:1;	CSHNEG	0	NA	0	20	20	0.990201	0.975344	0.00122344	0.95257	1.34129	0.00310685
	ONLI_0545	Cer-NS d42:2; Cer-NS d18:1/24:1;	CSHNEG	VJSBNBBOSZJDKB-KPEYJIHVSA-N	5283568	CCCCCCCCCCCCC/C=C/[C@H]([C@H](CO)NC(=O)CCCCCCCCCCCCC/C=C\CCCCCCCC)O	20	20	0.993613	0.999868	0.000171512	1.08171	1.4083	0.000517105
	ONLI_0546	PE 34:3; PE 16:0-18:3;	CSHNEG	QONZHKTZKTUIMU-WSQRTPJYSA-N	9546746	CCCCCCCCCCCCCCCC(=O)OC[C@H](COP(=O)(O)OCCN)OC(=O)CCCCCCC/C=C\C/C=C\C/C=C\CC	20	20	0.978639	0.734645	4.14e-09	1.49822	4.22949	4.02e-08
	ONLI_0547	PE 34:1; PE 16:0-18:1;	CSHNEG	FHQVHHIBKUMWTI-OTMQOFQLSA-N	5283496	CCCCCCCCCCCCCCCC(=O)OC[C@H](COP(=O)(O)OCCN)OC(=O)CCCCCCC/C=C\CCCCCCCC	20	20	0.850988	0.731126	1.88e-09	1.51801	2.84677	2.23e-08
	ONLI_0548	PE 36:6e; PE 16:1e/20:5;	CSHNEG	LEBOQMHVVYOZDX-AFHBIVKPSA-N	52924236	CCCCCC/C=C\CCCCCCCC(=O)OC[C@H](COP(=O)(O)OCCN)OC(=O)CCC/C=C\C/C=C\C/C=C\C/C=C\C/C=C\CC	20	20	0.999999	0.700798	5.02e-06	1.25406	2.27229	2.18e-05
	ONLI_0549	Cer-NS d43:1; Cer-NS d19:1/24:0;	CSHNEG	KSYIVRBEJSMJMX-PVNBSDFKSA-N	134745021	CCCCCCCCCCCCCCCCCCCCCCCC(=O)N[C@@H](CO)[C@@H](/C=C/CCCCCCCCCCCCCC)O	20	20	0.982397	0.959077	0.0033299	-0.875046	0.67103	0.00776978
	ONLI_0550	PE 36:4e; PE 18:2e/18:2;	CSHNEG	0	NA	0	20	20	0.994458	0.993	3.49e-05	1.16932	1.67425	0.000127257
	ONLI_0551	Cer-NP t42:0; Cer-NP t18:0/24:0;	CSHNEG	ZESJDNWGTANZCC-UHYFRKBVSA-N	129678169	[2H]CCCCCCCCCCCCCCCCCCCCCCCC(=O)N[C@@H](CO)[C@@H]([C@@H](CCCCCCCCCCCCCC)O)O	20	20	0.965339	0.916504	0.0109989	0.768562	1.31118	0.0233003
	ONLI_0552	PE 36:2e; PE 18:1e/18:1;	CSHNEG	GHNXVMPBTBKJRP-CLFAGFIQSA-N	138160177	CCCCCCCC/C=C\CCCCCCCCOCC(COP(=O)(O)OCCN)OC(=O)CCCCCCC/C=C\CCCCCCCC	19	19	0.999485	0.98862	7.75e-07	1.29331	1.3747	4.05e-06
	ONLI_0554	HexCer-AP t34:0; HexCer-AP t18:0/16:0;	CSHNEG	RHIXBFQKTNYVCX-KHDKDNTOSA-N	70678878	CCCCCCCCCCCCCC[C@H]([C@H]([C@H](CO)NC(=O)C(CCCCCCCCCCCCCC)O)O)O	20	19	0.645724	0.971522	0.0013755	0.903625	1.24099	0.00347108
	ONLI_0555	SM d32:1; SM d16:1/16:0;	CSHNEG	RPTUKVYGSPDHGQ-PSALXKTOSA-N	52931133	CCCCCCCCCCCCCCCC(=O)N[C@@H](COP(=O)([O-])OCC[N+](C)(C)C)[C@@H](/C=C/CCCCCCCCCCC)O	20	19	0.999994	0.709133	5.89e-07	-1.33254	0.765991	3.2e-06
	ONLI_0556	PE 36:4; PE 16:0-20:4;	CSHNEG	NQIMLWFRWGTTOZ-JGGKAAGMSA-N	53479588	CCCCCCCCCCCCCCCC(=O)OC[C@H](COP(=O)(O)OCCN)OC(=O)CCCCCC/C=C\C/C=C\C/C=C\C/C=C\CC	20	20	0.99999	0.615112	4.85e-08	1.42938	3.59888	3.42e-07
	ONLI_0557	PE 36:3	CSHNEG	DOILLFCKSSPXMF-ZKZIFNJMSA-N	52924364	CCCCCCCC/C=C\CCCCCCCC(=O)O[C@H](COC(=O)CCCCCCC/C=C\C/C=C\CCCCC)COP(=O)(O)OCCN	20	20	0.895848	0.3676	1.48e-09	1.52378	3.0215	1.86e-08
	ONLI_0559	PE 36:2; PE 18:0-18:2;	CSHNEG	YDTWOEYVDRKKCR-KNERPIHHSA-N	9546749	CCCCCCCCCCCCCCCCCC(=O)OC[C@H](COP(=O)(O)OCCN)OC(=O)CCCCCCC/C=C\C/C=C\CCCCC	20	20	0.963914	0.437286	2.99e-07	1.37013	2.20115	1.72e-06
	ONLI_0560	PE 36:1; PE 18:0-18:1;	CSHNEG	JQKOHRZNEOQNJE-DJEJVYNPSA-N	9546742	CCCCCCCCCCCCCCCCCC(=O)OC[C@H](COP(=O)(O)OCCN)OC(=O)CCCCCCC/C=C\CCCCCCCC	20	20	0.997862	0.733654	7.56e-07	1.33676	2.08454	3.98e-06
	ONLI_0562	PE 38:7e; PE 16:1e/22:6; [M-H]-	CSHNEG	WVGALBKSWOUIEZ-XNHMFJFDSA-N	5283497	CCCCCCCCCCCCCC/C=C\OC[C@H](COP(=O)(O)OCCN)OC(=O)CC/C=C\C/C=C\C/C=C\C/C=C\C/C=C\C/C=C\CC	20	20	0.999965	0.510476	3.66e-08	1.43785	1.68843	2.61e-07
	ONLI_0563	SM d33:1; SM d17:1/16:0;	CSHNEG	CGMZWBZSOINWHL-YPDYIYJKSA-N	52931137	CCCCCCCCCCCCCCCCC(=O)N[C@@H](COP(=O)([O-])OCC[N+](C)(C)C)[C@@H](/C=C/CCCCCCCCCCC)O	20	20	0.999999	0.915154	6.88e-07	-1.34025	0.773855	3.67e-06
	ONLI_0564	PE 38:6e; PE 18:1e/20:5;	CSHNEG	WHKDVYYCCUAIBY-QSOAFSPRSA-N	138287875	CCCCCCCC/C=C\CCCCCCCCOCC(COP(=O)(O)OCCN)OC(=O)CCC/C=C\C/C=C\C/C=C\C/C=C\C/C=C\CC	20	20	0.998724	0.998938	3.56e-05	1.16833	1.34865	0.00012916
	ONLI_0565	PE 38:6e; PE 18:2e/20:4;	CSHNEG	QGMRGDWLZOYPFY-YUPWHRRNSA-N	138243517	CCCCC/C=C\C/C=C\CCCCCCCCOCC(COP(=O)(O)OCCN)OC(=O)CCCCCC/C=C\C/C=C\C/C=C\C/C=C\CC	20	20	0.960755	0.540057	2.47e-09	1.51131	2.07295	2.72e-08
	ONLI_0566	PC 30:0; PC 14:0-16:0;	CSHNEG	RFVFQQWKPSOBED-PSXMRANNSA-N	129657	CCCCCCCCCCCCCCCC(=O)O[C@H](COC(=O)CCCCCCCCCCCCC)COP(=O)([O-])OCC[N+](C)(C)C	20	19	0.998349	0.71037	2.55e-06	-1.26255	0.544553	1.18e-05
	ONLI_0567	PE 38:4e; PE 18:0e/20:4;	CSHNEG	LRBBGQHIVCMVRY-PQNGYSQDSA-N	52925027	CCCCCCCCCCCCCCCCCCOC[C@H](COP(=O)(O)OCCN)OC(=O)CCC/C=C\C/C=C\C/C=C\C/C=C\CCCCC	20	20	0.893324	0.70271	0.268651	0.346058	1.08561	0.383447
	ONLI_0568	HexCer-NS d34:1; HexCer-NS d18:1/16:0;	CSHNEG	VJLLLMIZEJJZTE-JRIZINFMSA-N	134853938	CCCCCCCCCCCCCCCC(=O)N[C@@H](CO[C@H]1C(C([C@H](C(O1)CO)O)O)O)[C@@H](/C=C/CCCCCCCCCCCCC)O	20	20	0.839982	0.975446	5.31e-09	-1.49179	0.479012	4.97e-08
	ONLI_0569	SM d34:2; SM d18:2/16:0;	CSHNEG	YLWSJLLZUHSIEA-CKSUKHGVSA-N	52931235	CCCCCCCCCCCCCCCC(=O)N[C@@H](COP(=O)([O-])OCC[N+](C)(C)C)[C@@H](/C=C/CCCCCCCC/C=C\CCC)O	20	20	0.5877	0.731334	1.44e-09	1.52439	1.52821	1.86e-08
	ONLI_0570	SM d34:1	CSHNEG	RWKUXQNLWDTSLO-GWQJGLRPSA-N	9939941	CCCCCCCCCCCCCCCC(=O)N[C@@H](COP(=O)([O-])OCC[N+](C)(C)C)[C@@H](/C=C/CCCCCCCCCCCCC)O	20	20	0.922017	0.499198	1.99e-06	-1.29935	0.81755	9.51e-06
	ONLI_0571	PE 38:6; PE 16:0-22:6;	CSHNEG	MPWUZHVZZKSTPV-MADBQMNMSA-N	9546799	CCCCCCCCCCCCCCCC(=O)OC[C@H](COP(=O)(O)OCCN)OC(=O)CC/C=C\C/C=C\C/C=C\C/C=C\C/C=C\C/C=C\CC	20	20	0.371751	0.371751	3.69e-10	1.55562	2.54535	7.42e-09
	ONLI_0572	PE 38:5; PE 18:1-20:4;	CSHNEG	ZYMZKMQPPJPQHY-COHGUQLJSA-N	53479651	CCCCCCCC/C=C\CCCCCCCC(=O)OC[C@H](COP(=O)(O)OCCN)OC(=O)CCCCCC/C=C\C/C=C\C/C=C\C/C=C\CC	20	20	0.919061	0.271175	1.46e-08	1.4645	2.77892	1.12e-07
	ONLI_0573	PE18:1e/18-HETE	CSHNEG	ANCAYQLYUYMKFT-GZPCIZTNSA-N	134718784	CCCCCCCCCCCCCCCC/C=C\OCC(COP(=O)(O)OCCN)OC(=O)CCC/C=C\C/C=C\C/C=C\C/C=C\CCC(CC)O	20	20	0.890026	0.879161	4.73e-05	1.15356	1.55746	0.000170154
	ONLI_0574	PE 38:4; PE 18:0-20:4;	CSHNEG	YEHAZLUVAZKVRO-PDWSRYNESA-N	53479610	CCCCCCCCCCCCCCCCCC(=O)OC[C@H](COP(=O)(O)OCCN)OC(=O)CCCCCC/C=C\C/C=C\C/C=C\C/C=C\CC	20	20	0.861008	0.947226	8.22e-09	1.48021	1.86328	7.11e-08
	ONLI_0575	PE 40:8e; PE 18:2e/22:6;	CSHNEG	VVEHXBSUSFPSAC-OJMLKDQNSA-N	138283942	CCCCC/C=C\C/C=C\CCCCCCCCOCC(COP(=O)(O)OCCN)OC(=O)CC/C=C\C/C=C\C/C=C\C/C=C\C/C=C\C/C=C\CC	20	20	0.999994	0.833869	5.28e-06	1.25848	1.58513	2.28e-05
	ONLI_0576	SM d35:1; SM d18:1/17:0;	CSHNEG	YMQZQHIESOAPQH-JXGHDCMNSA-N	46891763	CCCCCCCCCCCCCCCCC(=O)N[C@@H](COP(=O)([O-])OCC[N+](C)(C)C)[C@@H](/C=C/CCCCCCCCCCCCC)O	20	20	1	0.947474	2.4e-06	-1.29173	0.823302	1.13e-05
	ONLI_0577	PE 40:6e; PE 18:0e/22:6;	CSHNEG	CFLIAMAPAOTPGM-AOXDHDBISA-N	52923729	CCCCCCCCCCCCCCCCCCOC[C@H](COP(=O)(O)OCCN)OC(=O)CC/C=C\C/C=C\C/C=C\C/C=C\C/C=C\C/C=C\CC	20	20	0.991727	0.999954	0.167656	0.429707	1.07487	0.258551
	ONLI_0578	PC 32:1e; PC 16:1e/16:0;	CSHNEG	BXQUYBIIGCTQFV-MGIDVFSBSA-O	6913608	CCCCCCCCCCCCCCCC(=O)O[C@H](COCCCCCCCC/C=C\CCCCCC)COP(=O)(O)OCC[N+](C)(C)C	20	20	0.747115	0.973251	0.909643	-0.0357915	0.978204	0.938798
	ONLI_0579	PG 36:0; PG 17:0-19:0;	CSHNEG	VRXBINAFDUHENA-IOLBBIBUSA-N	52926502	CCCCCCCCCCCCCCCCCCC(=O)O[C@H](COC(=O)CCCCCCCCCCCCCCCC)COP(=O)(O)OC[C@H](CO)O	20	20	0.887352	0.992438	0.387112	0.271424	1.04856	0.507533
	ONLI_0580	PE 40:5e; PE 18:0e/22:5;	CSHNEG	QIJJGYHBXLEBJV-MVCMTJSTSA-N	53480858	CCCCCCCCCCCCCCCC/C=C\OC[C@H](COP(=O)(O)OCCN)OC(=O)CCCCC/C=C\C/C=C\C/C=C\C/C=C\C/C=C\CC	20	20	1	0.807185	8.36e-08	1.41246	1.77136	5.51e-07
	ONLI_0581	PC 32:0e; PC 16:0e/16:0;	CSHNEG	PEWXKAOBUSBJLD-MCBGMKGZSA-N	11146967	CCCCCCCCCCCCCCCC(=O)O[C@H](CO/C=C\CCCCCCCCCCCCCC)COP(=O)([O-])OCC[N+](C)(C)C	20	20	0.956609	0.99916	3.58e-07	1.36387	1.26242	2.03e-06
	ONLI_0582	HexCer-NS d36:1; HexCer-NS d18:1/18:0;	CSHNEG	YMYQEDCYNANIPI-FKFSGHLWSA-N	135039461	CCCCCCCCCCCCCCCCCC(=O)N[C@@H](CO[C@@H]1C(C([C@@H](C(O1)CO)O)O)O)[C@@H](/C=C/CCCCCCCCCCCCC)O	20	19	1.01e-06	0.260802	2.81e-12	-1.51529	0.0816413	2.27e-09
	ONLI_0583	SM d36:2	CSHNEG	NELGJAUZKNHZLS-NUIAMLAYSA-N	52931161	CCCCCCCCCCCCCCCCCC(=O)N[C@@H](COP(=O)([O-])OCC[N+](C)(C)C)[C@@H](/C=C/CCCCCCCC/C=C\CCC)O	20	20	0.928135	0.547638	3.13e-09	-1.50534	0.475786	3.19e-08
	ONLI_0584	PE 40:7; PE 18:1-22:6;	CSHNEG	JZSZAGWWWKKXLO-RMEBTJIYSA-N	52922113	CCCCCCCC/C=C\CCCCCCCC(=O)OC[C@H](COP(=O)(O)OCCN)OC(=O)CC/C=C\C/C=C\C/C=C\C/C=C\C/C=C\C/C=C\CC	20	20	0.260802	0.260802	2.77e-10	1.56185	2.41778	6.19e-09
	ONLI_0585	PC 32:2; PC 14:0-18:2;	CSHNEG	IWXJKHSPEQSQMD-GMGFYYQASA-N	24778624	CCCCCCCCCCCCCC(=O)OC[C@H](COP(=O)([O-])OCC[N+](C)(C)C)OC(=O)CCCCCCC/C=C\C/C=C\CCCCC	20	20	0.832912	0.392136	1.12e-09	1.53033	1.77232	1.53e-08
	ONLI_0586	PE 40:6; PE 18:0-22:6;	CSHNEG	XYYHNDVKALDFHQ-OXHZBIAZSA-N	9546798	CCCCCCCCCCCCCCCCCC(=O)OC[C@H](COP(=O)(O)OCCN)OC(=O)CC/C=C\C/C=C\C/C=C\C/C=C\C/C=C\C/C=C\CC	20	20	0.750757	0.850892	2.42e-09	1.51177	1.95791	2.72e-08
	ONLI_0588	PE 40:5; PE 18:0-22:5;	CSHNEG	DPRXQVIZBLENFV-NPQRSGSQSA-N	53479611	CCCCCCCCCCCCCCCCCC(=O)OC[C@H](COP(=O)(O)OCCN)OC(=O)CC/C=C\C/C=C\C/C=C\C/C=C\C/C=C\CCCCC	20	20	0.260802	0.260802	2.77e-10	1.56185	4.10972	6.19e-09
	ONLI_0589	PC 34:3e; PC 16:1e/18:2;	CSHNEG	AXCLECQLCBWNLZ-KZZBVOOISA-N	53481709	CCCCCC/C=C\CCCCCCCCOC[C@H](COP(=O)([O-])OCC[N+](C)(C)C)OC(=O)CCCCCCC/C=C\C/C=C\CCCCC	20	20	0.99909	0.962993	1.36e-05	1.21561	1.46838	5.34e-05
	ONLI_0590	PC 33:2; PC 15:0-18:2;	CSHNEG	DGBYUHHIADYUMU-UESLNCBNSA-N	24778664	CCCCCCCCCCCCCCC(=O)OC[C@H](COP(=O)([O-])OCC[N+](C)(C)C)OC(=O)CCCCCCC/C=C\C/C=C\CCCCC	20	20	0.260802	0.260802	2.77e-10	1.56185	1.80729	6.19e-09
	ONLI_0592	PC 34:2e; PC 16:1e/18:1;	CSHNEG	WDQJCKHLEYAETE-MGXYOJEMSA-N	138286710	CCCCCCCC/C=C\CCCCCCCC(=O)OC(COCCCCCCCC/C=C\CCCCCC)COP(=O)([O-])OCC[N+](C)(C)C	20	20	0.856027	0.742403	0.389253	0.270214	1.06108	0.50951
	ONLI_0593	PC 34:2e; PC 16:0e/18:2;	CSHNEG	IQACMFWAGALEAQ-WESJWMGVSA-N	6443157	CCCCCCCCCCCCCCCCOC[C@H](COP(=O)([O-])OCC[N+](C)(C)C)OC(=O)CCCCCCC/C=C\C/C=C\CCCCC	20	20	0.260802	0.260802	2.77e-10	1.56185	2.00676	6.19e-09
	ONLI_0594	SM d38:1; SM d16:1/22:0;	CSHNEG	XNBRFUCJENKXCT-SVLGDMRNSA-N	52931183	CCCCCCCCCCCCCCCCCCCCCC(=O)N[C@@H](COP(=O)([O-])OCC[N+](C)(C)C)[C@@H](/C=C/CCCCCCCCCCC)O	20	20	0.997849	0.899385	0.0122926	0.749152	1.44078	0.0255698
	ONLI_0596	PC 34:1e; PC 16:0e/18:1;	CSHNEG	JJGMGPGKWYLISM-NPBIGWJUSA-N	42607455	CCCCCCCCCCCCCCCCOC[C@H](COP(=O)(O)OCCN)OC(=O)CCCCCCC/C=C\CCCCCCCC	20	20	0.998872	0.899507	0.000136207	1.09523	1.17684	0.000420102
	ONLI_0597	PI 32:1; PI 16:0-16:1;	CSHNEG	QAWXBJDYTIBLRK-JEHNQGNYSA-N	52928334	CCCCCCCCCCCCCCCC(=O)OC[C@H](COP(=O)(O)OC1C([C@@H](C(C(C1O)O)O)O)O)OC(=O)CCCCCCC/C=C\CCCCCC	20	20	0.899318	0.390867	1.74e-09	1.50267	4.88409	2.16e-08
	ONLI_0598	PI 32:0; PI 16:0-16:0;	CSHNEG	IBUKXRINTKQBRQ-CSRWQWPHSA-N	24779556	CCCCCCCCCCCCCCCC(=O)OC[C@H](COP(=O)(O)OC1C([C@@H](C(C(C1O)O)O)O)O)OC(=O)CCCCCCCCCCCCCCC	20	20	0.998202	0.995234	0.013494	0.748475	1.31731	0.0277109
	ONLI_0599	PC 34:4; PC 14:0-20:4;	CSHNEG	BXZPYXMUABUWBT-JAHIUHDMSA-N	53478607	CCCCCCCCCCCCCC(=O)OC[C@H](COP(=O)([O-])OCC[N+](C)(C)C)OC(=O)CCCCCC/C=C\C/C=C\C/C=C\C/C=C\CC	20	20	0.66935	0.809842	6.83e-07	1.34049	1.61255	3.67e-06
	ONLI_0600	PC 34:3	CSHNEG	CNNSEHUKQJCGTE-UPPWDXJYSA-N	24778699	CCCCCCCCCCCCCCCC(=O)OC[C@H](COP(=O)([O-])OCC[N+](C)(C)C)OC(=O)CCCC/C=C\C/C=C\C/C=C\CCCCC	20	20	0.586877	0.832999	1.45e-09	1.52429	1.90747	1.86e-08
	ONLI_0601	PC 34:3; PC 16:1-18:2;	CSHNEG	QJWDAOSZZYVBJZ-KXESGEQTSA-N	24778768	CCCCCC/C=C\CCCCCCCC(=O)OC[C@H](COP(=O)([O-])OCC[N+](C)(C)C)OC(=O)CCCCCCC/C=C\C/C=C\CCCCC	20	20	0.371751	0.371751	3.69e-10	1.55562	2.43966	7.42e-09
	ONLI_0603	PC 36:5e; PC 16:1e/20:4;	CSHNEG	HOTMLHWJOWGLLX-UZKIFIPLSA-N	53481713	CCCCCC/C=C\CCCCCCCCOC[C@H](COP(=O)([O-])OCC[N+](C)(C)C)OC(=O)CCC/C=C\C/C=C\C/C=C\C/C=C\CCCCC	20	19	0.99996	0.808023	3.45e-07	-1.36105	0.765534	1.97e-06
	ONLI_0604	16:0-20:4 PC	CSHNEG	IIZPXYDJLKNOIY-JXPKJXOSSA-N	10747814	CCCCCCCCCCCCCCCC(=O)OC[C@H](COP(=O)([O-])OCC[N+](C)(C)C)OC(=O)CCC/C=C\C/C=C\C/C=C\C/C=C\CCCCC	19	20	0.82613	0.882048	0.0299077	0.651897	1.18647	0.0569165
	ONLI_0605	PC 36:4e; PC 16:0e/20:4;	CSHNEG	SOUZQPFUXRVDGK-KCTKZSJBSA-N	53481701	CCCCCCCCCCCCCCCCOC[C@H](COP(=O)([O-])OCC[N+](C)(C)C)OC(=O)CCCCCC/C=C\C/C=C\C/C=C\C/C=C\CC	20	20	0.990111	0.80083	2.91e-07	1.37106	1.32072	1.7e-06
	ONLI_0606	PC 36:3; PC 16:0-20:3;	CSHNEG	SRIGHEHXEGELQJ-YYQUKWHJSA-N	24778719	CCCCCCCCCCCCCCCC(=O)OC[C@H](COP(=O)([O-])OCC[N+](C)(C)C)OC(=O)CCCCCC/C=C\C/C=C\C/C=C\CCCCC	20	20	0.877872	0.868425	0.00499662	0.840786	1.32041	0.0112669
	ONLI_0607	PC 36:3e; PC 18:1e/18:2;	CSHNEG	MFZLAZYUXHHSIA-HVODBARTSA-N	6443159	CCCCCCCC/C=C\CCCCCCCCOC[C@H](COP(=O)([O-])OCC[N+](C)(C)C)OC(=O)CCCCCCC/C=C\C/C=C\CCCCC	20	20	0.99809	0.000123335	2.09e-05	1.09705	1.95703	8.01e-05
	ONLI_0608	SM d40:2; SM d14:0/26:2;	CSHNEG	0	NA	0	20	20	0.741763	0.410589	8.53e-10	1.53676	3.06321	1.25e-08
	ONLI_0609	PC 36:2e; PC 18:0e/18:2;	CSHNEG	LMGTVCKIUNTOEP-HJTCUGKVSA-N	6443070	CCCCCCCCCCCCCCCCCCOC[C@H](COP(=O)([O-])OCC[N+](C)(C)C)OC(=O)CCCCCCC/C=C\C/C=C\CCCCC	20	20	0.945449	0.951941	9.59e-05	1.11526	1.28944	0.000306239
	ONLI_0611	SM d39:1; SM d16:1/23:0;	CSHNEG	DZDNLWWCTCDASI-QVDCKBILSA-N	52931189	CCCCCCCCCCCCCCCCCCCCCCC(=O)N[C@@H](COP(=O)([O-])OCC[N+](C)(C)C)[C@@H](/C=C/CCCCCCCCCCC)O	20	20	0.260802	0.260802	2.77e-10	1.56185	2.24395	6.19e-09
	ONLI_0613	PC 35:1; PC 17:0-18:1;	CSHNEG	SXNXGNVZTLZDHE-IYEJTHTFSA-O	5313302	CCCCCCCCCCCCCCCCC(=O)OC[C@H](COP(=O)(O)OCC[N+](C)(C)C)OC(=O)CCCCCCC/C=C\CCCCCCCC	20	20	0.418682	0.626264	6.47e-10	1.5431	1.62915	1.11e-08
	ONLI_0614	PI 34:2; PI 16:0-18:2;	CSHNEG	BSNJSZUDOMPYIR-YBCFFXQBSA-N	46891796	CCCCCCCCCCCCCCCC(=O)OC[C@H](COP(=O)(O)OC1C([C@@H](C(C(C1O)O)O)O)O)OC(=O)CCCCCCC/C=C\C/C=C\CCCCC	20	20	0.828378	0.986045	1.04e-08	1.47371	1.88586	8.58e-08
	ONLI_0615	PI 34:1; PI 16:0-18:1;	CSHNEG	PDLAMJKMOKWLAJ-PVPULFMTSA-N	5771758	CCCCCCCCCCCCCCCC(=O)OC[C@H](COP(=O)(O)OC1C([C@@H](C(C(C1O)O)O)O)O)OC(=O)CCCCCCC/C=C\CCCCCCCC	20	20	0.997333	0.999989	5.02e-07	1.35175	1.85563	2.79e-06
	ONLI_0617	PC 36:4; PC 16:0-20:4;	CSHNEG	JAVWFBAAZSHHAD-HCYAGMRRSA-N	53478669	CCCCCCCCCCCCCCCC(=O)OC[C@H](COP(=O)([O-])OCC[N+](C)(C)C)OC(=O)CCCCCC/C=C\C/C=C\C/C=C\C/C=C\CC	20	20	0.707264	0.797569	9.75e-05	1.11433	1.14349	0.000309507
	ONLI_0618	HexCer-NS d40:2; HexCer-NS d18:1/22:1;	CSHNEG	0	NA	0	20	20	0.999904	0.511045	1.83e-08	1.45801	3.55734	1.38e-07
	ONLI_0619	SM d40:3; SM d14:1/26:2;	CSHNEG	FMJPKVXVBYILLP-FTRJIJDXSA-N	52931199	CCCCCCCC/C=C\CCCCCCCCCCCC(=O)N[C@@H](COP(=O)([O-])OCC[N+](C)(C)C)[C@@H](/C=C/CCCCCCCC/C=C\CCC)O	20	20	0.795089	0.899318	2.45e-09	1.51147	2.36157	2.72e-08
	ONLI_0620	PC 36:3 a	CSHNEG	YBNAKFLXDDROCX-YGRWKTHCSA-N	53478723	CCCCCC/C=C\CCCCCCCCCC(=O)OC[C@H](COP(=O)([O-])OCC[N+](C)(C)C)OC(=O)CCCCCCC/C=C\C/C=C\CCCCC	20	19	0.996399	0.720441	3.37e-08	1.40882	1.34501	2.42e-07
	ONLI_0621	PC 36:3 b	CSHNEG	XMZFUVYOYPLVOA-VLHUWQDUSA-N	24778715	CCCCCCCCCCCCCCCC(=O)OC[C@H](COP(=O)([O-])OCC[N+](C)(C)C)OC(=O)CCC/C=C\C/C=C\C/C=C\CCCCCCCC	20	19	0.618345	0.945983	1.34e-07	1.38286	1.363	8.31e-07
	ONLI_0622	PC 36:3; PC 18:1-18:2;	CSHNEG	GDWULUGDXGHJIJ-VJHNMZKJSA-N	24778939	CCCCCCCC/C=C\CCCCCCCC(=O)OC[C@H](COP(=O)([O-])OCC[N+](C)(C)C)OC(=O)CCCCCCC/C=C\C/C=C\CCCCC	20	19	0.996399	0.720441	3.37e-08	1.40882	1.34501	2.42e-07
	ONLI_0623	SM d40:2; SM d18:2/22:0;	CSHNEG	APNZBDYCMWLVNM-NWHASJFHSA-N	52931237	CCCCCCCCCCCCCCCCCCCCCC(=O)N[C@@H](COP(=O)([O-])OCC[N+](C)(C)C)[C@@H](/C=C/CCCCCCCC/C=C\CCC)O	20	20	0.260802	0.260802	2.77e-10	1.56185	3.0918	6.19e-09
	ONLI_0625	PC 36:2; PC 18:0-18:2;	CSHNEG	FORFDCPQKJHEBF-VPUSDGANSA-N	6441487	CCCCCCCCCCCCCCCCCC(=O)OC[C@H](COP(=O)([O-])OCC[N+](C)(C)C)OC(=O)CCCCCCC/C=C\C/C=C\CCCCC	20	20	0.99968	0.997647	1.65e-05	1.2063	1.16617	6.4e-05
	ONLI_0628	PI 35:2; PI 17:0-18:2;	CSHNEG	AJAKJCJJRMUWFW-WNEYDAEMSA-N	52927654	CCCCCCCCCCCCCCCCC(=O)OC[C@H](COP(=O)(O)OC1C([C@@H](C(C(C1O)O)O)O)O)OC(=O)CCCCCCC/C=C\C/C=C\CCCCC	20	20	0.968077	0.612203	4.94e-08	1.42883	1.95796	3.43e-07
	ONLI_0629	PC 36:0; PC 16:0-20:0;	CSHNEG	HVPURDWMANOTFO-HUESYALOSA-N	24778711	CCCCCCCCCCCCCCCCCCCC(=O)O[C@H](COC(=O)CCCCCCCCCCCCCCC)COP(=O)([O-])OCC[N+](C)(C)C	20	19	0.600995	0.287396	0.152067	-0.412299	0.635481	0.238624
	ONLI_0631	PC 38:6e; PC 18:2e/20:4;	CSHNEG	ZZSZQATYGVHNLZ-PUMLCSCDSA-N	24778979	CCCCC/C=C\C/C=C\CCCCCCCC(=O)OC[C@H](COP(=O)([O-])OCC[N+](C)(C)C)OC(=O)CCC/C=C\C/C=C\C/C=C\C/C=C\CCCCC	20	20	0.968837	0.992612	0.140752	0.457933	1.15559	0.223924
	ONLI_0632	PC 38:5e; PC 18:1e/20:4; [M+Hac-H]-	CSHNEG	YPEVVVCDYBKGNI-XVPBXHJGSA-O	70698776	CCCCCCCC/C=C\CCCCCCCCOC[C@H](COP(=O)(O)OCC[N+](C)(C)C)OC(=O)CCCCCC/C=C\C/C=C\C/C=C\C/C=C\CC	20	20	0.998675	0.999595	5.91e-05	1.14178	1.22885	0.000205119
	ONLI_0633	PC 37:4; PC 17:0-20:4;	CSHNEG	MHUZXLUKTLNHIX-GUNPMBPGSA-N	24778518	CCCCCCCCCCCCCCCCC(=O)OC[C@H](COP(=O)([O-])OCC[N+](C)(C)C)OC(=O)CCC/C=C\C/C=C\C/C=C\C/C=C\CCCCC	20	20	0.989145	0.999566	0.189862	0.408786	1.05312	0.287291
	ONLI_0635	PC 38:4e; PC 18:0e/20:4;	CSHNEG	GBNPCIWXLWZJGA-IGBSIYCFSA-N	6443065	CCCCCCCCCCCCCCCCCCOC[C@H](COP(=O)([O-])OCC[N+](C)(C)C)OC(=O)CCC/C=C\C/C=C\C/C=C\C/C=C\CCCCC	19	20	0.28515	0.770021	0.855877	0.0549228	1.01523	0.904174
	ONLI_0637	GlcCerd18:14E/24:0	CSHNEG	POQRWMRXUOPCLD-AAAFHMTMSA-N	6321361	CCCCCCCCCCCCCCCCCCCCCCCC(=O)N[C@@H](CO[C@H]1C(C([C@@H]([C@H](O1)CO)O)O)O)[C@@H](/C=C/CCCCCCCCCCCCC)O	20	20	0.999176	0.997189	0.865684	-0.053338	0.992533	0.910948
	ONLI_0638	PI 36:4; PI 16:0-20:4;	CSHNEG	VWRYMIZQLPXULA-ZLIQYQLMSA-N	53480053	CCCCCCCCCCCCCCCC(=O)OC[C@H](COP(=O)(O)OC1C([C@@H](C(C(C1O)O)O)O)O)OC(=O)CCCCCC/C=C\C/C=C\C/C=C\C/C=C\CC	20	20	0.496067	0.990848	5.25e-09	1.49209	1.88204	4.97e-08
	ONLI_0640	PC 37:2; PC 19:0-18:2;	CSHNEG	LOOVXTAPKGYHKO-HJTCUGKVSA-N	52922957	CCCCCCCCCCCCCCCCCCC(=O)OC[C@H](COP(=O)([O-])OCC[N+](C)(C)C)OC(=O)CCCCCCC/C=C\C/C=C\CCCCC	20	20	0.260802	0.260802	2.77e-10	1.56185	2.52859	6.19e-09
	ONLI_0641	PI 36:3; PI 18:1-18:2;	CSHNEG	MXJMOLQIXMJUEL-PEAJWMICSA-N	52928384	CCCCCCCC/C=C\CCCCCCCC(=O)OC[C@H](COP(=O)(O)OC1C([C@@H](C(C(C1O)O)O)O)O)OC(=O)CCCCCCC/C=C\C/C=C\CCCCC	20	20	0.260802	0.260802	2.77e-10	1.56185	1.89887	6.19e-09
	ONLI_0643	PC 37:1; PC 19:0-18:1;	CSHNEG	WMCPHMOQTITNBG-KXTYCBLYSA-N	52922955	CCCCCCCCCCCCCCCCCCC(=O)OC[C@H](COP(=O)([O-])OCC[N+](C)(C)C)OC(=O)CCCCCCC/C=C\CCCCCCCC	20	20	0.260802	0.260802	2.77e-10	1.56185	2.79135	6.19e-09
	ONLI_0644	PI 36:2; PI 18:0-18:2;	CSHNEG	KZVRAFHIKMDULK-LNVBWDHHSA-N	52928409	CCCCCCCCCCCCCCCCCC(=O)OC[C@H](COP(=O)(O)OC1C([C@@H](C(C(C1O)O)O)O)O)OC(=O)CCCCCCC/C=C\C/C=C\CCCCC	20	20	1	0.948094	1.63e-06	1.30711	1.62074	7.93e-06
	ONLI_0645	PC 38:7; PC 16:1-22:6;	CSHNEG	DLRNZUPJXRVWRW-FKZZUUMNSA-N	24778773	CCCCCC/C=C\CCCCCCCC(=O)OC[C@H](COP(=O)([O-])OCC[N+](C)(C)C)OC(=O)CC/C=C\C/C=C\C/C=C\C/C=C\C/C=C\C/C=C\CC	20	20	0.999961	0.670004	1.83e-08	1.45801	2.42651	1.38e-07
	ONLI_0646	PI 36:1; PI 18:0-18:1;	CSHNEG	YOBFISPJJWPPTK-UDGQDVNKSA-N	13073037	CCCCCCCCCCCCCCCCCC(=O)OCC(COP(=O)(O)OC1[C@@H]([C@H](C([C@H]([C@@H]1O)O)O)O)O)OC(=O)CCCCCCC/C=C/CCCCCCCC	20	20	0.991719	0.865829	6.5e-05	1.13664	1.51172	0.000220903
	ONLI_0648	PC 38:6; PC 18:2-20:4;	CSHNEG	RUHBZJXWUDKAMZ-XXAGCNFXSA-N	53478789	CCCCC/C=C\C/C=C\CCCCCCCC(=O)OC[C@H](COP(=O)([O-])OCC[N+](C)(C)C)OC(=O)CCCCCC/C=C\C/C=C\C/C=C\C/C=C\CC	20	20	0.999999	0.596531	1.09e-07	1.4039	1.42286	6.92e-07
	ONLI_0649	SM d42:5; SM d14:3/28:2;	CSHNEG	0	NA	0	20	20	0.000539932	0.260802	2.87e-11	-1.51169	0.109411	6.19e-09
	ONLI_0650	PC 38:5; PC 16:0-22:5;	CSHNEG	ARDJUHDXABDVFH-ZHSIBHBUSA-N	24778737	CCCCCCCCCCCCCCCC(=O)OC[C@H](COP(=O)([O-])OCC[N+](C)(C)C)OC(=O)CCCCC/C=C\C/C=C\C/C=C\C/C=C\C/C=C\CC	19	20	0.57852	0.985785	0.00510193	0.803445	1.23892	0.0114722
	ONLI_0651	PC 38:5; PC 18:1-20:4;	CSHNEG	SWOKEJBWARJLGN-ORKYUJCWSA-N	53478767	CCCCCCCC/C=C\CCCCCCCC(=O)OC[C@H](COP(=O)([O-])OCC[N+](C)(C)C)OC(=O)CCCCCC/C=C\C/C=C\C/C=C\C/C=C\CC	20	20	0.967567	0.869853	0.00678182	0.813759	1.19586	0.014795
	ONLI_0652	HexCer-NS d42:3; HexCer-NS d18:1/24:2;	CSHNEG	0	NA	0	20	20	0.559455	0.98286	0.00704607	-0.810297	0.787925	0.01533
	ONLI_0653	PC 38:4	CSHNEG	PSVRFUPOQYJOOZ-QNPWAGBNSA-N	16219824	CCCCCCCCCCCCCCCCCC(=O)OC[C@H](COP(=O)([O-])OCC[N+](C)(C)C)OC(=O)CCC/C=C\C/C=C\C/C=C\C/C=C\CCCCC	20	20	0.993567	0.996266	0.000770594	-0.98543	0.843825	0.00204729
	ONLI_0654	PC 38:4; PC 16:0-22:4;	CSHNEG	IRWRFKUTKSUFST-MDYGELLQSA-N	24778732	CCCCCCCCCCCCCCCC(=O)OC[C@H](COP(=O)([O-])OCC[N+](C)(C)C)OC(=O)CCCCC/C=C\C/C=C\C/C=C\C/C=C\CCCCC	20	20	0.993567	0.996266	0.000770594	-0.98543	0.843825	0.00204729
	ONLI_0656	SM d42:3; SM d18:2/24:1;	CSHNEG	TXFLWJQVQCDUDZ-BRUGZULGSA-N	52931215	CCCCCCCC/C=C\CCCCCCCCCCCCCC(=O)N[C@@H](COP(=O)([O-])OCC[N+](C)(C)C)[C@@H](/C=C/CCCCCCCC/C=C\CCC)O	19	20	0.874515	0.993403	0.567115	-0.172714	0.988814	0.671135
	ONLI_0657	PC 38:3	CSHNEG	QXDDDGCNWRUEFM-UMKMFDOBSA-N	24778855	CCCCCCCCCCCCCCCCCC(=O)OC[C@H](COP(=O)([O-])OCC[N+](C)(C)C)OC(=O)CCC/C=C\C/C=C\C/C=C\CCCCCCCC	20	20	0.912528	0.797296	0.00082889	0.980358	1.32238	0.00218773
	ONLI_0658	PC 38:3; PC 18:0-20:3;	CSHNEG	VGSUMLIRUGDCTF-NSMRCOLJSA-N	24778857	CCCCCCCCCCCCCCCCCC(=O)OC[C@H](COP(=O)([O-])OCC[N+](C)(C)C)OC(=O)CCCCCC/C=C\C/C=C\C/C=C\CCCCC	20	20	0.839977	0.761327	0.00118954	0.954617	1.31834	0.00303031
	ONLI_0659	PI 37:4; PI 17:0-20:4;	CSHNEG	IVKFRZJXXGDYJH-YAOSNULYSA-N	9547141	CCCCCCCCCCCCCCCCC(=O)OC[C@H](COP(=O)(O)OC1C([C@@H](C(C(C1O)O)O)O)O)OC(=O)CCC/C=C\C/C=C\C/C=C\C/C=C\CCCCC	20	20	0.811872	0.811872	1.89e-09	1.5179	1.53107	2.23e-08
	ONLI_0661	SM d42:2; SM d18:1/24:1;	CSHNEG	SUTDVWUQTJGTCQ-IMMYYDDQSA-N	138265057	CCCCCCCCCCCCC/C=C/C(C(COP(=O)([O-])OCC[N+](C)(C)C)NC(=O)CCCCCCCCC/C=C\CCCCCCCCCCCC)O	20	19	0.685975	0.854558	0.0268049	-0.663976	0.920624	0.0514987
	ONLI_0663	PC 38:1; PC 20:0-18:1;	CSHNEG	IKNYBQRADNMEDT-FHLWKLDVSA-N	24779038	CCCCCCCCCCCCCCCCCCCC(=O)OC[C@H](COP(=O)([O-])OCC[N+](C)(C)C)OC(=O)CCCCCCC/C=C\CCCCCCCC	20	20	0.260802	0.260802	2.77e-10	1.56185	2.48936	6.19e-09
	ONLI_0664	PI 37:2; PI 19:0-18:2;	CSHNEG	NUMIHVUWHVIWMT-ISIIRVGKSA-N	52927884	CCCCCCCCCCCCCCCCCCC(=O)OC[C@H](COP(=O)(O)OC1C([C@@H](C(C(C1O)O)O)O)O)OC(=O)CCCCCCC/C=C\C/C=C\CCCCC	20	19	0.940472	0.527312	8.24e-09	1.48176	4.0116	7.11e-08
	ONLI_0665	PC 40:6; PC 18:0-22:6;	CSHNEG	FAUYAENFVCNTAL-PFFNLMTBSA-N	24778876	CCCCCCCCCCCCCCCCCC(=O)OC[C@H](COP(=O)([O-])OCC[N+](C)(C)C)OC(=O)CC/C=C\C/C=C\C/C=C\C/C=C\C/C=C\C/C=C\CC	20	20	0.856417	0.644776	0.971437	0.0112931	1.00828	0.978732
	ONLI_0666	PI 38:6; PI 16:0-22:6;	CSHNEG	FPHAZHKZJQOPBU-BYFJYSEFSA-N	52927464	CCCCCCCCCCCCCCCC(=O)OC[C@H](COP(=O)(O)OC1C([C@@H](C(C(C1O)O)O)O)O)OC(=O)CC/C=C\C/C=C\C/C=C\C/C=C\C/C=C\C/C=C\CC	20	20	0.709311	0.868286	3.11e-09	1.5055	1.73643	3.19e-08
	ONLI_0667	PC 39:4; PC 19:0-20:4;	CSHNEG	XHOZASDZLMZZMU-TTYGYADASA-N	52922975	CCCCCCCCCCCCCCCCCCC(=O)OC[C@H](COP(=O)([O-])OCC[N+](C)(C)C)OC(=O)CCC/C=C\C/C=C\C/C=C\C/C=C\CCCCC	20	20	0.260802	0.260802	2.77e-10	1.56185	1.89613	6.19e-09
	ONLI_0668	PI 38:5; PI 18:1-20:4;	CSHNEG	SHIZRFSRTKXRQL-FFZLMNBLSA-N	52928302	CCCCCCCC/C=C\CCCCCCCC(=O)OC[C@H](COP(=O)(O)OC1C([C@@H](C(C(C1O)O)O)O)O)OC(=O)CCC/C=C\C/C=C\C/C=C\C/C=C\CCCCC	20	20	0.750757	0.850892	2.42e-09	1.51177	2.20439	2.72e-08
	ONLI_0669	PI 38:4; PI 18:0-20:4;	CSHNEG	KRTOMQDUKGRFDJ-LWFBQQSYSA-N	42607491	CCCCCCCCCCCCCCCCCC(=O)OC[C@H](COP(=O)(O)OC1C([C@@H](C(C(C1O)O)O)O)O)OC(=O)CCC/C=C\C/C=C\C/C=C\C/C=C\CCCCC	20	20	0.972467	0.998964	0.0204256	0.705753	1.14684	0.0403995
	ONLI_0670	PI 38:3; PI 18:0-20:3;	CSHNEG	ZUGLBBVIAIBIKG-BZXCBJNASA-N	52928308	CCCCCCCCCCCCCCCCCC(=O)OC[C@H](COP(=O)(O)OC1C([C@@H](C(C(C1O)O)O)O)O)OC(=O)CCCCCC/C=C\C/C=C\C/C=C\CCCCC	20	20	0.832912	0.392136	1.12e-09	1.53033	2.39683	1.53e-08
	ONLI_0671	PC 40:8; PC 18:2-22:6;	CSHNEG	FCTKCFNDGVBOBD-YZXVGOFNSA-N	24778983	CCCCC/C=C\C/C=C\CCCCCCCC(=O)OC[C@H](COP(=O)([O-])OCC[N+](C)(C)C)OC(=O)CC/C=C\C/C=C\C/C=C\C/C=C\C/C=C\C/C=C\CC	20	20	0.260802	0.260802	2.77e-10	1.56185	1.63637	6.19e-09
	ONLI_0672	PC 40:7; PC 18:1-22:6;	CSHNEG	FPEVDFOXMCHLKL-KFDYCXSYSA-N	24778955	CCCCCCCC/C=C\CCCCCCCC(=O)OC[C@H](COP(=O)([O-])OCC[N+](C)(C)C)OC(=O)CC/C=C\C/C=C\C/C=C\C/C=C\C/C=C\C/C=C\CC	20	20	0.988093	0.996795	0.00514681	0.838214	1.21068	0.0115409
	ONLI_0673	PC 40:6	CSHNEG	FYVNIFOYDIIODX-KNKJIUSSSA-N	24778900	CCCCCC/C=C\CCCCCCCCCC(=O)OC[C@H](COP(=O)([O-])OCC[N+](C)(C)C)OC(=O)CCCCC/C=C\C/C=C\C/C=C\C/C=C\C/C=C\CC	20	19	0.898434	0.645772	0.0323696	-0.6274	0.891044	0.0614565
	ONLI_0674	PC 40:5; PC 18:0-22:5;	CSHNEG	MAAMGQXOTCBPFS-JPGWWKBXSA-N	24778873	CCCCCCCCCCCCCCCCCC(=O)OC[C@H](COP(=O)([O-])OCC[N+](C)(C)C)OC(=O)CCCCC/C=C\C/C=C\C/C=C\C/C=C\C/C=C\CC	20	19	0.999876	0.801227	0.0590811	0.557246	1.17859	0.103617
	ONLI_0675	PC 40:4	CSHNEG	UAVRPIXHIHJERN-CBTSKTMBSA-N	24779048	CCCCCCCCCCCCCCCCCCCC(=O)OC[C@H](COP(=O)([O-])OCC[N+](C)(C)C)OC(=O)CCC/C=C\C/C=C\C/C=C\C/C=C\CCCCC	20	20	0.260802	0.260802	2.77e-10	1.56185	6.49275	6.19e-09
	ONLI_0676	PC 40:4; PC 18:0-22:4;	CSHNEG	QQIYXJBHMDYXHH-NMUBDWGHSA-N	52923573	CCCCC/C=C\C/C=C\CCCCCCCCCCCC(=O)OC[C@H](COP(=O)([O-])OCC[N+](C)(C)C)OC(=O)CCCCCCC/C=C\C/C=C\CCCCC	20	20	0.99458	0.986063	0.513315	0.205587	1.04627	0.627039
	ONLI_0677	PI 39:4; PI 19:0-20:4;	CSHNEG	UNISCSAECSQMPE-LSUZBHEKSA-N	52927893	CCCCCCCCCCCCCCCCCCC(=O)OC[C@H](COP(=O)(O)OC1C([C@@H](C(C(C1O)O)O)O)O)OC(=O)CCC/C=C\C/C=C\C/C=C\C/C=C\CCCCC	20	20	0.497908	0.410042	4.89e-10	1.54938	2.552	8.95e-09
	ONLI_0679	PI 40:6; PI 18:0-22:6;	CSHNEG	DJVOKHFQPGWUPK-PNBUVQRSSA-N	52927465	CCCCCCCCCCCCCCCCCC(=O)OC[C@H](COP(=O)(O)OC1C([C@@H](C(C(C1O)O)O)O)O)OC(=O)CC/C=C\C/C=C\C/C=C\C/C=C\C/C=C\C/C=C\CC	20	19	0.998418	0.522656	4.27e-07	1.32879	1.44016	2.41e-06
	ONLI_0680	PI 40:5; PI 18:0-22:5;	CSHNEG	QLABQLNIHHHJCI-FCGLMCRWSA-N	53480067	CCCCCCCCCCCCCCCCCC(=O)OC[C@H](COP(=O)(O)OC1C([C@@H](C(C(C1O)O)O)O)O)OC(=O)CCCCC/C=C\C/C=C\C/C=C\C/C=C\C/C=C\CC	20	20	0.850988	0.731126	1.88e-09	1.51801	2.37543	2.23e-08
	ONLI_0682	PI 40:4; PI 20:0-20:4;	CSHNEG	FPYBELXGPLJKPW-NGNRSKJCSA-N	52928284	CCCCCCCCCCCCCCCCCCCC(=O)OC[C@H](COP(=O)(O)OC1C([C@@H](C(C(C1O)O)O)O)O)OC(=O)CCC/C=C\C/C=C\C/C=C\C/C=C\CCCCC	20	20	0.959347	0.963897	0.00046116	1.02003	2.72258	0.00130716
	ONLI_0683	PC 42:7; PC 20:1-22:6;	CSHNEG	FYVDGOCCFDKYOR-OEQCKVCZSA-N	52923147	CCCCCCCC/C=C\CCCCCCCCCC(=O)OC[C@H](COP(=O)([O-])OCC[N+](C)(C)C)OC(=O)CC/C=C\C/C=C\C/C=C\C/C=C\C/C=C\C/C=C\CC	20	20	0.260802	0.260802	2.77e-10	1.56185	2.81408	6.19e-09
	ONLI_0702	2R-3-Hydroxyisovaleroylcarnitine	HILICPOS	IGLHHSKNBDXCEY-SECBINFHSA-N	131668011	CC(C)(CC(=O)O[C@H](CC(=O)[O-])C[N+](C)(C)C)O	20	20	0.947631	0.725631	0.175981	-0.421645	0.922307	0.269325
	ONLI_0703	R-Butyrylcarnitine	HILICPOS	QWYFHHGCZUCMBN-SECBINFHSA-N	213144	CCCC(=O)O[C@H](CC(=O)[O-])C[N+](C)(C)C	20	20	0.961362	0.99955	0.514913	-0.204812	0.918522	0.627657
	ONLI_0704	S-Cotinine N-oxide	HILICPOS	CIPULDKLIIVIER-VIFPVBQESA-N	9815514	CN1[C@@H](CCC1=O)C2=C[N+](=CC=C2)[O-]	20	20	0.9805	0.999637	0.297862	-0.32598	0.82871	0.416151
	ONLI_0705	1-Methyl-L-histidine	HILICPOS	BJHIKXHVCXFQLS-OTWZMJIISA-NÂ	92105	CN1C=C(N=C1)C[C@@H](C(=O)O)N	20	20	0.379945	0.996465	7.14e-08	1.4174	1.7103	4.79e-07
	ONLI_0706	2-Indolinone	HILICPOS	JYGFTBXVXVMTGB-UHFFFAOYSA-N	321710	C1C2=CC=CC=C2NC1=O	20	20	0.611794	0.997775	2.34e-06	-1.29271	0.411076	1.11e-05
	ONLI_0707	3-Hydroxybutyrylcarnitine	HILICPOS	UEFRDQSMQXDWTO-YGPZHTELSA-N	90659885	CC(CC(=O)O[C@H](CC(=O)[O-])C[N+](C)(C)C)O	20	20	0.532628	0.151463	0.0356315	0.643623	1.16743	0.0659388
	ONLI_0708	4-Hydroxynonenal	HILICPOS	JVJFIQYAHPMBBX-FNORWQNLSA-N	5283344	CCCCCC(/C=C/C=O)O	20	20	0.926012	0.985647	0.245106	-0.363314	1.13745	0.3568
	ONLI_0710	5-Hydroxytryptophol	HILICPOS	KQROHCSYOGBQGJ-UHFFFAOYSA-N	9061	C1=CC2=C(C=C1O)C(=CN2)CCO	20	20	0.877792	0.803005	0.206846	-0.393927	0.711627	0.309218
	ONLI_0711	5-Methylcytosine	HILICPOS	LRSASMSXMSNRBT-UHFFFAOYSA-N	65040	CC1=C(NC(=O)N=C1)N	20	20	0.0594012	0.174037	0.700997	0.120987	1.02876	0.788132
	ONLI_0712	7-Keto-3a,12-a-dihydroxycholanic acid	HILICPOS	RHCPKKNRWFXMAT-RRWYKFPJSA-N	188292	C[C@H](CCC(=O)O)[C@H]1CC[C@@H]2[C@@]1([C@H](C[C@H]3[C@H]2C(=O)C[C@H]4[C@@]3(CC[C@H](C4)O)C)O)C	19	20	0.000131472	2.31e-07	0.298285	0.250985	1.4241	0.416151
	ONLI_0714	Arg-Ala	HILICPOS	WVRUNFYJIHNFKD-UHFFFAOYSA-N	4198036	CC(C(=O)O)NC(=O)C(CCCN=C(N)N)N	20	20	0.637453	0.927939	0.0494483	0.604032	1.17799	0.0878717
	ONLI_0717	Arg-Gly	HILICPOS	XUUXCWCKKCZEAW-UHFFFAOYSA-N	5074903	C(CC(C(=O)NCC(=O)O)N)CN=C(N)N	20	20	0.824013	0.997807	0.187729	0.410717	1.12495	0.285136
	ONLI_0720	Arg-Ser	HILICPOS	IJYZHIOOBGIINM-UHFFFAOYSA-N	9943142	C(CC(C(=O)NC(CO)C(=O)O)N)CN=C(N)N	20	20	0.00407963	0.0340626	0.659536	-0.124055	1.02732	0.75523
	ONLI_0722	Arg-Val	HILICPOS	DAQIJMOLTMGJLO-UHFFFAOYSA-N	335257	CC(C)C(C(=O)O)NC(=O)C(CCCN=C(N)N)N	20	20	8.04e-06	0.0124067	0.043733	-0.519331	0.693447	0.0787586
	ONLI_0729	Glu-Arg	HILICPOS	MPZWMIIOPAPAKE-BQBZGAKWSA-N	9796450	C(C[C@@H](C(=O)O)NC(=O)[C@H](CCC(=O)O)N)CN=C(N)N	20	20	0.871858	0.619866	0.494828	0.214641	1.05285	0.612825
	ONLI_0730	Gluconolactone	HILICPOS	PHOQVHQSTUBQQK-SQOUGZDYSA-N	7027	C([C@@H]1[C@H]([C@@H]([C@H](C(=O)O1)O)O)O)O	19	20	0.779553	0.876277	0.212597	-0.373024	0.933138	0.316341
	ONLI_0731	Glu-Lys	HILICPOS	BBBXWRGITSUJPB-YUMQZZPRSA-N	7015703	C(CC[NH3+])C[C@@H](C(=O)[O-])NC(=O)[C@H](CCC(=O)[O-])[NH3+]	20	19	0.115264	0.221959	0.841394	-0.0605097	0.933575	0.894745
	ONLI_0732	Glu-Phe	HILICPOS	XMBSYZWANAQXEV-QWRGUYRKSA-N	18653118	C1=CC=C(C=C1)C[C@@H](C(=O)O)NC(=O)[C@H](CCC(=O)O)N	20	20	0.67448	0.780929	0.105551	0.50168	1.10954	0.177387
	ONLI_0733	Glycerophosphocholine	HILICPOS	SUHOQUVVVLNYQR-QMMMGPOBSA-N	71920	C[N+](C)(C)CCOP(=O)([O-])OC[C@H](CO)O	20	20	0.718878	0.251811	0.000323786	-1.0428	0.781175	0.000951269
	ONLI_0734	Glycyl-leucine	HILICPOS	DKEXFJVMVGETOO-LURJTMIESA-N	92843	CC(C)C[C@@H](C(=O)O)NC(=O)CN	20	20	0.936489	0.965057	0.00212427	-0.911003	0.828965	0.00518194
	ONLI_0735	Hexanoyl-L-carnitine	HILICPOS	VVPRQWTYSNDTEA-LLVKDONJSA-N	3246938	CCCCCC(=O)O[C@H](CC(=O)[O-])C[N+](C)(C)C	20	20	0.944757	0.996869	0.664182	-0.136759	0.931037	0.75882
	ONLI_0739	Isovaleryl-L-carnitine	HILICPOS	IGQBPDJNUXPEMT-UHFFFAOYSA-N	6426851	CC(C)CC(=O)OC(CC(=O)[O-])C[N+](C)(C)C	20	20	0.947912	0.991959	0.0171395	-0.724171	0.859438	0.0344073
	ONLI_0740	Lauroyl-L-carnitine	HILICPOS	FUJLYHJROOYKRA-QGZVFWFLSA-N	168381	CCCCCCCCCCCC(=O)O[C@H](CC(=O)[O-])C[N+](C)(C)C	20	19	0.999846	0.775249	0.803744	-0.0751319	0.926603	0.864992
	ONLI_0742	L-Cysteine-glutathione disulfide	HILICPOS	BNRXZEPOHPEEAS-PPSBICQBSA-N	53477713	C(CC(=O)N[C@@H](CSSCC(C(=O)O)N)C(=O)NCC(=O)O)[C@@H](C(=O)O)N	20	20	0.862708	0.853611	0.23415	0.371726	1.09931	0.341468
	ONLI_0744	Leu-Arg	HILICPOS	SENJXOPIZNYLHU-UHFFFAOYSA-N	3800205	CC(C)CC(C(=O)NC(CCCN=C(N)N)C(=O)O)N	20	20	0.932521	0.999452	0.790282	-0.0838401	0.989681	0.853928
	ONLI_0745	Leu-Pro	HILICPOS	VTJUNIYRYIAIHF-IUCAKERBSA-N	80817	CC(C)C[C@@H](C(=O)N1CCC[C@H]1C(=O)O)N	20	20	0.474821	0.481623	0.939979	0.0237476	0.997204	0.957609
	ONLI_0746	L-Homocitrulline	HILICPOS	XIGSAGMEBXLVJJ-YFKPBYRVSA-N	65072	C(CCNC(=O)N)C[C@@H](C(=O)O)N	20	20	0.972802	0.969823	0.0409155	-0.627213	0.844773	0.0746871
	ONLI_0747	Linoleoylcarnitine	HILICPOS	MJLXQSQYKZWZCB-DQFWFXSYSA-N	6450015	CCCCC/C=C\C/C=C\CCCCCCCC(=O)O[C@H](CC(=O)[O-])C[N+](C)(C)C	20	19	0.987164	0.45226	0.407834	-0.24918	0.863321	0.526132
	ONLI_0749	Lys-Gly	HILICPOS	HGNRJCINZYHNOU-UHFFFAOYSA-N	259320	C(CCN)CC(C(=O)NCC(=O)O)N	20	20	0.76433	0.993159	0.740221	0.104493	1.09281	0.817391
	ONLI_0750	Lys-Val	HILICPOS	YQAIUOWPSUOINN-UHFFFAOYSA-N	140709	CC(C)C(C(=O)O)NC(=O)C(CCCCN)N	20	20	0.563145	0.719615	0.67786	0.130863	1.04955	0.767479
	ONLI_0751	N-.alpha.-Acetyl-L-arginine	HILICPOS	SNEIUMQYRCDYCH-LURJTMIESA-N	67427	CC(=O)N[C@@H](CCCN=C(N)N)C(=O)O	20	20	0.660612	0.857681	0.129453	0.470981	1.13109	0.20842
	ONLI_0752	N.alpha.-Acetyl-L-lysine	HILICPOS	VEYYWZRYIYDQJM-UHFFFAOYSA-N	192590	CC(=O)NC(CCCCN)C(=O)O	20	20	0.936489	0.965057	0.00212427	-0.911003	0.828965	0.00518194
	ONLI_0753	N.alpha.-Methyl-L-lysine	HILICPOS	OLYPWXRMOFUVGH-LURJTMIESA-N	7010497	CN[C@@H](CCCCN)C(=O)O	20	20	0.979699	0.988483	0.248091	-0.361067	0.918116	0.360473
	ONLI_0754	N-Acetyl-L-carnosine	HILICPOS	BKAYIFDRRZZKNF-SECBINFHSA-N	10221026	CC(=O)NCCC(=O)N[C@H](CC1=CN=CN1)C(=O)O	20	20	0.614276	0.737706	1.29e-08	1.45131	2.70715	1.03e-07
	ONLI_0756	N-alpha-Acetyl-L-ornithine	HILICPOS	JRLGPAXAGHMNOL-LURJTMIESA-N	439232	CC(=O)N[C@@H](CCCN)C(=O)O	20	20	0.999794	0.950603	0.0184224	-0.716654	0.847495	0.0366174
	ONLI_0757	NEPSILON,NEPSILON,NEPSILON-TRIMETHYLLYSINE	HILICPOS	MXNRLFUSFKVQSK-QMMMGPOBSA-N	440120	C[N+](C)(C)CCCC[C@@H](C(=O)[O-])N	20	19	0.677193	0.66702	0.746027	0.0978922	0.966013	0.820426
	ONLI_0760	Nicotinamide riboside cation	HILICPOS	JLEBZPBDRKPWTD-TURQNECASA-O	439924	C1=CC(=C[N+](=C1)[C@H]2[C@@H]([C@@H]([C@H](O2)CO)O)O)C(=O)N	20	20	0.961189	0.999523	6e-05	-1.14101	0.649141	0.000207205
	ONLI_0761	O-Acetyl-L-homoserine	HILICPOS	FCXZBWSIAGGPCB-UHFFFAOYSA-N	528	CC(=O)OCCC(C(=O)O)N	20	20	0.942959	0.77133	0.973339	0.0104856	1.06724	0.979423
	ONLI_0763	Phenylacetylglutamine	HILICPOS	JFLIEFSWGNOPJJ-JTQLQIEISA-N	92258	C1=CC=C(C=C1)CC(=O)N[C@@H](CCC(=O)N)C(=O)O	20	20	0.972017	0.813242	0.266972	-0.347254	0.912126	0.381727
	ONLI_0765	Pyridoxal	HILICPOS	RADKZDMFGJYCBB-UHFFFAOYSA-N	1050	CC1=NC=C(C(=C1O)C=O)CO	20	20	0.636723	0.999909	7.42e-08	-1.41622	0.569636	4.94e-07
	ONLI_0766	Ser-Glu	HILICPOS	LAFKUZYWNCHOHT-UHFFFAOYSA-N	3613616	C(CC(=O)O)C(C(=O)O)NC(=O)C(CO)N	20	20	0.999916	0.999974	0.885971	0.0452237	1.00297	0.926396
	ONLI_0768	Ser-Lys	HILICPOS	SBMNPABNWKXNBJ-BQBZGAKWSA-N	16122513	C(CCN)C[C@@H](C(=O)O)NC(=O)[C@H](CO)N	19	20	3.78e-05	2.66e-07	0.174181	0.289262	1.20503	0.267077
	ONLI_0770	Ser-Tyr	HILICPOS	MALNXHYEPCSPPU-UHFFFAOYSA-N	4575735	C1=CC(=CC=C1CC(C(=O)O)NC(=O)C(CO)N)O	20	20	0.987445	0.992178	0.0347618	0.646512	1.30705	0.064776
	ONLI_0772	Spermidine	HILICPOS	ATHGHQPFGPMSJY-UHFFFAOYSA-N	1102	C(CCNCCCN)CN	20	20	0.886882	0.998476	0.645656	-0.144819	0.94585	0.740389
	ONLI_0773	Stachydrine	HILICPOS	CMUNUTVVOOHQPW-LURJTMIESA-N	115244	C[N+]1(CCC[C@H]1C(=O)[O-])C	20	19	0.928866	0.767606	0.465616	-0.219883	0.89212	0.584744
	ONLI_0774	Stearoyl-L-carnitine	HILICPOS	FNPHNLNTJNMAEE-HSZRJFAPSA-N	52922056	CCCCCCCCCCCCCCCCCC(=O)O[C@H](CC(=O)[O-])C[N+](C)(C)C	20	19	0.997851	0.94015	0.116745	-0.47816	0.887907	0.191795
	ONLI_0776	Thr-Ala	HILICPOS	VPZKQTYZIVOJDV-UHFFFAOYSA-N	18218243	CC(C(C(=O)NC(C)C(=O)O)N)O	20	20	0.999471	0.999791	0.0128597	0.753261	1.16649	0.0264758
	ONLI_0780	trans-3'-Hydroxycotinine	HILICPOS	XOKCJXZZNAUIQN-IENPIDJESA-N	10219774	CN1[C@@H](CC(C1=O)O)C2=CN=CC=C2	20	20	0.974396	0.99941	0.56241	0.182293	1.15405	0.666775
	ONLI_0781	Tryptamine	HILICPOS	APJYDQYYACXCRM-UHFFFAOYSA-N	1150	C1=CC=C2C(=C1)C(=CN2)CCN	20	20	0.392136	0.832912	1.12e-09	-1.53033	0.577581	1.53e-08
	ONLI_0784	Val-Gln	HILICPOS	XXDVDTMEVBYRPK-UHFFFAOYSA-N	5253209	CC(C)C(C(=O)NC(CCC(=O)N)C(=O)O)N	20	20	7.75e-05	7.18e-06	0.94762	-0.0164308	1.01368	0.960748
	ONLI_0788	1-Methyladenosine	HILICPOS	GFYLSDSUCHVORB-IOSLPCCCSA-N	27476	CN1C=NC2=C(C1=N)N=CN2[C@H]3[C@@H]([C@@H]([C@H](O3)CO)O)O	20	19	0.999973	0.973971	0.000351232	-0.992878	0.789309	0.00102443
	ONLI_0789	1-Methylguanosine	HILICPOS	UTAIYTHAJQNQDW-KQYNXXCUSA-N	96373	CN1C(=O)C2=C(N=C1N)N(C=N2)[C@H]3[C@@H]([C@@H]([C@H](O3)CO)O)O	20	20	0.76385	0.849188	0.0461746	-0.612512	0.861564	0.0826012
	ONLI_0791	3-Guanidinopropionic acid	HILICPOS	KMXXSJLYVJEBHI-UHFFFAOYSA-N	67701	C(CN=C(N)N)C(=O)O	20	20	0.919561	0.791689	0.0328609	0.653039	1.10364	0.0618061
	ONLI_0792	3-Hydroxyphenylacetic acid	HILICPOS	FVMDYYGIDFPZAX-UHFFFAOYSA-N	12122	C1=CC(=CC(=C1)O)CC(=O)O	20	20	0.200898	0.00945194	0.363544	0.261639	1.18421	0.483724
	ONLI_0793	3-Hydroxyproline	HILICPOS	BJBUEDPLEOHJGE-BKLSDQPFSA-N	150779	C1CN[C@@H](C1O)C(=O)O	20	20	0.832912	0.392136	1.12e-09	1.53033	2.02574	1.53e-08
	ONLI_0795	5-Aminovaleric acid	HILICPOS	JJMDCOVWQOJGCB-UHFFFAOYSA-N	138	C(CCN)CC(=O)O	20	20	0.653758	0.841929	0.271607	-0.343963	0.922349	0.384936
	ONLI_0798	Ala-Ile	HILICPOS	ZSOICJZJSRWNHX-UHFFFAOYSA-N	417358	CCC(C)C(C(=O)O)NC(=O)C(C)N	20	20	0.429264	0.999817	6.11e-05	-1.11986	0.49449	0.000210048
	ONLI_0799	Betaine	HILICPOS	KWIUHFFTVRNATP-UHFFFAOYSA-N	247	C[N+](C)(C)CC(=O)[O-]	20	20	0.653758	0.841929	0.271607	-0.343963	0.922349	0.384936
	ONLI_0801	Creatinine	HILICPOS	DDRJAANPRJIHGJ-UHFFFAOYSA-N	588	CN1CC(=O)N=C1N	20	20	0.987019	0.999959	7.13e-05	-1.13162	0.828856	0.000238247
	ONLI_0802	Cytosine	HILICPOS	OPTASPLRGRRNAP-UHFFFAOYSA-N	597	C1=C(NC(=O)N=C1)N	20	20	0.925159	0.938004	0.0538087	-0.593413	0.781597	0.0947833
	ONLI_0803	Galactosamine	HILICPOS	MSWZFWKMSRAUBD-GASJEMHNSA-N	24154	C([C@@H]1[C@@H]([C@@H]([C@H](C(O1)O)N)O)O)O	20	20	0.959016	0.954173	0.0378634	0.636464	1.12353	0.0697484
	ONLI_0807	N2,N2-Dimethylguanosine	HILICPOS	RSPURTUNRHNVGF-IOSLPCCCSA-N	135501639	CN(C)C1=NC2=C(C(=O)N1)N=CN2[C@H]3[C@@H]([C@@H]([C@H](O3)CO)O)O	20	20	0.489683	0.893245	0.907428	-0.0366729	0.926652	0.938798
	ONLI_0808	N-Acetyl-5-hydroxytryptamine	HILICPOS	MVAWJSIDNICKHF-UHFFFAOYSA-N	903	CC(=O)NCCC1=CNC2=C1C=C(C=C2)O	20	20	0.59998	0.946611	0.418083	-0.24978	0.877245	0.535066
	ONLI_0809	N-Acetylcytidine	HILICPOS	NIDVTARKFBZMOT-PEBGCTIMSA-N	107461	CC(=O)NC1=NC(=O)N(C=C1)[C@H]2[C@@H]([C@@H]([C@H](O2)CO)O)O	20	19	0.993536	0.831527	2.37e-07	-1.38089	0.636041	1.4e-06
	ONLI_0810	N-Acetylglucosamine	HILICPOS	OVRNDRQMDRJTHS-RTRLPJTCSA-N	439174	CC(=O)N[C@@H]1[C@H]([C@@H]([C@H](OC1O)CO)O)O	20	20	0.99995	0.999282	0.00969579	0.780652	1.37397	0.0208136
	ONLI_0811	N-Acetylphenylalanine	HILICPOS	CBQJSKKFNMDLON-JTQLQIEISA-N	74839	CC(=O)N[C@@H](CC1=CC=CC=C1)C(=O)O	20	20	0.285833	0.099959	0.21337	-0.388447	0.84854	0.316905
	ONLI_0812	N-Methylleucine	HILICPOS	XJODGRWDFZVTKW-LURJTMIESA-N	2777993	CC(C)C[C@@H](C(=O)O)NC	20	20	0.97096	0.961948	0.549279	-0.188424	0.89933	0.657991
	ONLI_0813	N-Methyltyrosine	HILICPOS	MWZPENIJLUWBSY-VIFPVBQESA-N	70652	COC(=O)[C@H](CC1=CC=C(C=C1)O)N	20	20	0.868226	0.997319	0.936471	-0.0251386	0.911234	0.955461
	ONLI_0814	Putrescine	HILICPOS	KIDHWZJUCRJVML-UHFFFAOYSA-N	1045	C(CCN)CN	20	20	0.977529	0.892824	0.0967533	0.514315	1.12464	0.163284
	ONLI_0815	Retinoic acid	HILICPOS	SHGAZHPCJJPHSC-YCNIQYBTSA-N	444795	CC1=C(C(CCC1)(C)C)/C=C/C(=C/C=C/C(=C/C(=O)O)/C)/C	20	20	0.0694112	0.134841	0.599685	-0.157799	0.979282	0.700648
	ONLI_0816	1-Methylnicotinamide	HILICPOS	LDHMAVIPBRSVRG-UHFFFAOYSA-O	457	C[N+]1=CC=CC(=C1)C(=O)N	19	20	0.788346	0.915475	0.000121785	-1.05383	0.599064	0.000381467
	ONLI_0818	3-Ureidopropionic acid	HILICPOS	JSJWCHRYRHKBBW-UHFFFAOYSA-N	111	C(CNC(=O)N)C(=O)O	20	20	0.790862	0.538564	0.000117541	-1.10372	0.505122	0.000369613
	ONLI_0819	4-Acetamidobutyric acid	HILICPOS	UZTFMUBKZQVKLK-UHFFFAOYSA-N	18189	CC(=O)NCCCC(=O)O	20	20	0.660306	0.957226	0.405818	-0.260981	0.910503	0.524371
	ONLI_0820	4-Aminobenzoic acid	HILICPOS	ALYNCZNDIQEVRV-UHFFFAOYSA-N	978	C1=CC(=CC=C1C(=O)O)N	20	19	0.994771	0.891779	0.785976	-0.0820894	0.897692	0.850418
	ONLI_0821	4-Guanidinobutyric acid	HILICPOS	TUHVEAJXIMEOSA-UHFFFAOYSA-N	500	C(CC(=O)O)CN=C(N)N	20	20	0.797809	0.917149	0.664557	-0.136597	0.792468	0.75882
	ONLI_0822	5'-Methylthioadenosine	HILICPOS	WUUGFSXJNOTRMR-IOSLPCCCSA-N	439176	CSC[C@@H]1[C@H]([C@H]([C@@H](O1)N2C=NC3=C(N=CN=C32)N)O)O	20	20	0.861232	0.975398	0.0958897	0.515603	1.17542	0.162166
	ONLI_0823	6-Methyladenosine	HILICPOS	VQAYFKKCNSOZKM-IOSLPCCCSA-N	102175	CNC1=C2C(=NC=N1)N(C=N2)[C@H]3[C@@H]([C@@H]([C@H](O3)CO)O)O	20	20	0.925739	0.999071	0.935191	-0.0256459	0.994245	0.955367
	ONLI_0824	Acetylcarnitine	HILICPOS	RDHQFKQIGNGIED-MRVPVSSYSA-N	7045767	CC(=O)O[C@H](CC(=O)[O-])C[N+](C)(C)C	20	20	0.721632	0.724006	0.0209793	-0.702898	0.918322	0.041393
	ONLI_0825	Adenine	HILICPOS	GFFGJBXGBJISGV-UHFFFAOYSA-N	190	C1=NC2=NC=NC(=C2N1)N	20	20	0.888692	0.875028	0.0082234	0.796115	1.26805	0.0178432
	ONLI_0828	Agmatine	HILICPOS	QYPPJABKJHAVHS-UHFFFAOYSA-N	199	C(CCN=C(N)N)CN	20	20	0.543205	0.909667	0.250526	-0.359247	0.911139	0.362071
	ONLI_0829	Ala-Ala	HILICPOS	DEFJQIDDEAULHB-QWWZWVQMSA-N	5460362	C[C@H](C(=O)N[C@H](C)C(=O)O)N	20	20	0.992814	0.985103	0.369976	-0.281252	0.838584	0.489854
	ONLI_0834	Anserine	HILICPOS	MYYIAHXIVFADCU-QMMMGPOBSA-N	112072	CN1C=NC=C1C[C@@H](C(=O)O)NC(=O)CCN	20	20	0.260802	0.260802	2.77e-10	1.56185	1.92097	6.19e-09
	ONLI_0835	Arginine	HILICPOS	ODKSFYDXXFIFQN-BYPYZUCNSA-N	6322	C(C[C@@H](C(=O)O)N)CN=C(N)N	20	20	0.844875	0.669996	0.00360412	-0.868505	0.864052	0.0083371
	ONLI_0836	Asparagine	HILICPOS	DCXYFEDJOCDNAF-REOHCLBHSA-N	6267	C([C@@H](C(=O)O)N)C(=O)N	20	20	0.874113	0.964948	0.639364	0.147577	1.0198	0.735269
	ONLI_0837	Aspartic acid	HILICPOS	CKLJMWTZIZZHCS-REOHCLBHSA-N	5960	C([C@@H](C(=O)O)N)C(=O)O	19	20	0.771057	0.883029	0.0412581	0.600072	1.15603	0.075142
	ONLI_0838	Biliverdin	HILICPOS	RCNSAJSGRJSBKK-NSQVQWHSSA-N	5280353	CC\1=C(/C(=C/C2=C(C(=C(N2)/C=C\3/C(=C(C(=O)N3)C)C=C)C)CCC(=O)O)/N/C1=C\C4=NC(=O)C(=C4C)C=C)CCC(=O)O	20	20	0.949423	0.980311	0.0662557	0.566484	1.34634	0.115196
	ONLI_0839	Biotin	HILICPOS	YBJHBAHKTGYVGT-ZKWXMUAHSA-N	171548	C1[C@H]2[C@@H]([C@@H](S1)CCCCC(=O)O)NC(=O)N2	18	19	0.999991	0.0356999	0.589376	0.155338	0.900129	0.691615
	ONLI_0840	Caffeine	HILICPOS	RYYVLZVUVIJVGH-UHFFFAOYSA-N	2519	CN1C=NC2=C1C(=O)N(C(=O)N2C)C	20	20	0.834047	0.552247	0.903651	0.0381758	1.00798	0.938631
	ONLI_0841	Carnitine	HILICPOS	PHIQHXFUZVPYII-ZCFIWIBFSA-N	10917	C[N+](C)(C)C[C@@H](CC(=O)[O-])O	20	20	0.36287	0.96123	0.490366	-0.216852	0.962863	0.609173
	ONLI_0843	Choline	HILICPOS	OEYIOHPDSNJKLS-UHFFFAOYSA-N	305	C[N+](C)(C)CCO	20	20	0.97533	0.979606	0.451018	-0.236825	0.941632	0.571102
	ONLI_0844	Citrulline	HILICPOS	RHGKLRLOHDJJDR-BYPYZUCNSA-N	9750	C(C[C@@H](C(=O)O)N)CNC(=O)N	20	20	0.983549	0.939222	0.000895084	-0.97497	0.795103	0.00234704
	ONLI_0845	Cotinine	HILICPOS	UIKROCXWUNQSPJ-UHFFFAOYSA-N	408	CN1C(CCC1=O)C2=CN=CC=C2	20	19	0.97019	0.981911	0.639096	0.141631	1.03435	0.735269
	ONLI_0846	Creatine	HILICPOS	CVSVTCORWBXHQV-UHFFFAOYSA-N	586	CN(CC(=O)O)C(=N)N	20	20	0.919561	0.791689	0.0328609	0.653039	1.10364	0.0618061
	ONLI_0847	Cystathionine	HILICPOS	ILRYLPWNYFXEMH-WHFBIAKZSA-N	439258	C(CSC[C@@H](C(=O)O)N)[C@@H](C(=O)O)N	20	20	0.99987	0.998951	0.393843	-0.267633	0.934519	0.513411
	ONLI_0848	DL-2-Methylglutamic acid	HILICPOS	QHSCIWIRXWFIGH-UHFFFAOYSA-N	95440	CC(CCC(=O)O)(C(=O)O)N	20	20	0.948143	0.997478	0.0394615	0.631547	1.11217	0.0721966
	ONLI_0849	Ecgonine	HILICPOS	PHMBVCPLDPDESM-RLXKETGRSA-N	443003	CN1C2CCC1[C@H]([C@H](C2)O)C(=O)O	20	20	0.923471	0.998108	0.812399	0.0748269	1.18334	0.871975
	ONLI_0850	gamma-Aminobutyric Acid GABA	HILICPOS	BTCSSZJGUNDROE-UHFFFAOYSA-N	119	C(CC(=O)O)CN	20	20	0.996387	0.95015	0.0010216	-0.965589	0.7967	0.00262743
	ONLI_0851	gamma-Glutamylleucine	HILICPOS	MYFMARDICOWMQP-YUMQZZPRSA-N	151023	CC(C)C[C@@H](C(=O)O)NC(=O)CC[C@@H](C(=O)O)N	20	20	0.927012	0.957005	0.214243	0.387722	1.06018	0.317616
	ONLI_0852	gamma-Glutamylmethionine	HILICPOS	RQNSKRXMANOPQY-BQBZGAKWSA-N	7009567	CSCC[C@@H](C(=O)O)NC(=O)CC[C@@H](C(=O)O)N	20	20	0.992764	0.999924	0.430037	-0.247861	0.93264	0.548621
	ONLI_0853	Glu-Gln	HILICPOS	MGHKSHCBDXNTHX-WDSKDSINSA-N	10171586	C(CC(=O)O)[C@@H](C(=O)N[C@@H](CCC(=O)N)C(=O)O)N	20	20	0.924918	0.948738	0.303863	-0.322015	0.921718	0.421741
	ONLI_0854	Glutamic acid	HILICPOS	WHUUTDBJXJRKMK-VKHMYHEASA-N	33032	C(CC(=O)O)[C@@H](C(=O)O)N	20	20	0.999983	0.992622	1.11e-06	1.32214	1.44817	5.63e-06
	ONLI_0855	Glutamine	HILICPOS	ZDXPYRJPNDTMRX-VKHMYHEASA-N	5961	C(CC(=O)N)[C@@H](C(=O)O)N	19	19	0.695978	0.984482	7.08e-05	-1.05744	0.805469	0.000237629
	ONLI_0858	Glu-Thr	HILICPOS	JSIQVRIXMINMTA-ZDLURKLDSA-N	6998031	C[C@H]([C@@H](C(=O)O)NC(=O)[C@H](CCC(=O)O)N)O	20	20	0.466493	0.834881	0.154333	0.443235	1.09274	0.241709
	ONLI_0859	Gly-val	HILICPOS	STKYPAFSDFAEPH-UHFFFAOYSA-N	97417	CC(C)C(C(=O)O)NC(=O)CN	20	20	0.442859	0.959106	0.672854	0.133015	1.05626	0.76561
	ONLI_0860	Guanosine	HILICPOS	NYHBQMYGNKIUIF-UUOKFMHZSA-N	135398635	C1=NC2=C(N1[C@H]3[C@@H]([C@@H]([C@H](O3)CO)O)O)N=C(NC2=O)N	20	19	0.937646	0.000424971	0.00303663	0.781763	2.38124	0.00721088
	ONLI_0861	Histamine	HILICPOS	NTYJJOPFIAHURM-UHFFFAOYSA-N	774	C1=C(NC=N1)CCN	20	20	0.99113	0.994917	0.173977	-0.42356	0.80775	0.267077
	ONLI_0862	Histidine	HILICPOS	HNDVDQJCIGZPNO-YFKPBYRVSA-N	6274	C1=C(NC=N1)C[C@@H](C(=O)O)N	20	20	0.551676	0.781742	0.382741	0.273906	1.01901	0.504266
	ONLI_0863	Homoarginine	HILICPOS	QUOGESRFPZDMMT-YFKPBYRVSA-N	9085	C(CCN=C(N)N)C[C@@H](C(=O)O)N	20	20	0.31123	0.9539	2.58e-09	-1.51018	0.43668	2.81e-08
	ONLI_0864	Hypoxanthine	HILICPOS	FDGQSTZJBFJUBT-UHFFFAOYSA-N	135398638	C1=NC2=C(N1)C(=O)NC=N2	20	20	0.921976	0.805832	0.125246	0.476055	2.77731	0.203683
	ONLI_0866	Kynurenine	HILICPOS	YGPSJZOEDVAXAB-QMMMGPOBSA-N	161166	C1=CC=C(C(=C1)C(=O)C[C@@H](C(=O)O)N)N	20	20	0.577287	0.577287	8.47e-10	-1.53691	0.530392	1.25e-08
	ONLI_0867	Leucine	HILICPOS	ROHFNLRQFUQHCH-YFKPBYRVSA-N	6106	CC(C)C[C@@H](C(=O)O)N	20	20	0.976955	0.986315	0.132789	-0.467043	0.895064	0.213364
	ONLI_0871	N,N-Dimethylarginine	HILICPOS	YDGMGEXADBMOMJ-LURJTMIESA-N	123831	CN(C)C(=NCCC[C@@H](C(=O)O)N)N	20	20	0.999676	0.996044	9.77e-05	-1.11422	0.79842	0.000309507
	ONLI_0872	N8-Acetylspermidine	HILICPOS	FONIWJIDLJEJTL-UHFFFAOYSA-N	123689	CC(=O)NCCCCNCCCN	19	20	0.969624	0.745863	0.00179274	-0.884655	0.76826	0.00449581
	ONLI_0873	N-Acetylalanine	HILICPOS	KTHDTJVBEPMMGL-VKHMYHEASA-N	88064	C[C@@H](C(=O)O)NC(=O)C	20	20	0.977207	0.828752	0.0140102	-0.744719	0.868847	0.0286248
	ONLI_0875	N-Acetylmethionine	HILICPOS	XUYPXLNMDZIRQH-UHFFFAOYSA-N	6180	CC(=O)NC(CCSC)C(=O)O	20	20	0.86293	0.893556	0.930617	-0.0274601	0.959439	0.951902
	ONLI_0876	N-Acetyltryptophan	HILICPOS	DZTHIGRZJZPRDV-LBPRGKRZSA-N	700653	CC(=O)N[C@@H](CC1=CNC2=CC=CC=C21)C(=O)O	20	20	0.929923	0.600357	0.00319592	-0.878415	0.809544	0.00752256
	ONLI_0877	Nicotinamide	HILICPOS	DFPAKSUCGFBDDF-UHFFFAOYSA-N	936	C1=CC(=CN=C1)C(=O)N	20	20	0.86269	0.780458	0.617652	-0.157181	0.964799	0.717475
	ONLI_0878	N-Methylhistidine	HILICPOS	CYZKJBZEIFWZSR-LURJTMIESA-N	90638	CN[C@@H](CC1=CN=CN1)C(=O)O	20	20	0.808239	0.610214	0.00606465	0.823777	1.17228	0.0134122
	ONLI_0879	N-Methyllysine	HILICPOS	PQNASZJZHFPQLE-LURJTMIESA-N	164795	CNCCCC[C@@H](C(=O)O)N	20	20	0.540057	0.960755	2.47e-09	-1.51131	0.5265	2.72e-08
	ONLI_0880	N-Methylproline	HILICPOS	CWLQUGTUXBXTLF-YFKPBYRVSA-N	643474	CN1CCC[C@H]1C(=O)O	20	20	0.902683	0.996307	0.00339165	0.873533	1.28715	0.00789097
	ONLI_0882	Pantothenic acid	HILICPOS	GHOKWGTUZJEAQD-ZETCQYMHSA-N	6613	CC(C)(CO)[C@H](C(=O)NCCC(=O)O)O	20	20	0.410042	0.497908	4.89e-10	-1.54938	0.532815	8.95e-09
	ONLI_0884	Pipecolic acid	HILICPOS	HXEACLLIILLPRG-UHFFFAOYSA-N	849	C1CCNC(C1)C(=O)O	19	19	0.765488	0.999527	2.49e-06	1.26476	1.96355	1.17e-05
	ONLI_0885	Proline	HILICPOS	ONIBWKKTOPOVIA-BYPYZUCNSA-N	145742	C1C[C@H](NC1)C(=O)O	20	20	0.561922	0.826436	0.775506	0.0898979	0.986119	0.84135
	ONLI_0886	Proline-hydroxyproline	HILICPOS	ONPXCLZMBSJLSP-CSMHCCOUSA-N	11902892	C1C[C@H]([NH2+]C1)C(=O)N2C[C@@H](C[C@H]2C(=O)[O-])O	20	20	0.990356	0.923017	0.530307	-0.197407	0.914316	0.640987
	ONLI_0887	Propionylcarnitine	HILICPOS	UFAHZIUFPNSHSL-UHFFFAOYSA-N	107738	CCC(=O)OC(CC(=O)[O-])C[N+](C)(C)C	20	20	0.742171	0.499288	0.119986	-0.482583	0.890849	0.196319
	ONLI_0888	Pyridoxamine	HILICPOS	NHZMQXZHNVQTQA-UHFFFAOYSA-N	1052	CC1=NC=C(C(=C1O)CN)CO	20	20	0.274086	0.754153	0.000928496	-0.972383	0.73091	0.00242675
	ONLI_0889	S-Adenosyl-homocysteine	HILICPOS	ZJUKTBDSGOFHSH-WFMPWKQPSA-N	439155	C1=NC(=C2C(=N1)N(C=N2)[C@H]3[C@@H]([C@@H]([C@H](O3)CSCC[C@@H](C(=O)O)N)O)O)N	20	20	0.850845	0.253113	0.643214	0.141352	1.10123	0.73864
	ONLI_0891	Serine	HILICPOS	MTCFGRXMJLQNBG-REOHCLBHSA-N	5951	C([C@@H](C(=O)O)N)O	20	20	0.709308	0.992636	0.343281	-0.297123	0.93837	0.465221
	ONLI_0892	Targinine	HILICPOS	NTNWOCRCBQPEKQ-YFKPBYRVSA-N	132862	CN=C(N)NCCC[C@@H](C(=O)O)N	20	20	0.312499	0.91701	8.11e-05	-1.12456	0.721555	0.000264389
	ONLI_0893	Taurine	HILICPOS	XOAAWQZATWQOTB-UHFFFAOYSA-N	1123	C(CS(=O)(=O)O)N	20	20	0.260069	0.707179	0.0116125	0.763288	1.15818	0.0244074
	ONLI_0896	TMAO	HILICPOS	UYPYRKYUKCHHIB-UHFFFAOYSA-N	1145	C[N+](C)(C)[O-]	20	20	0.371751	0.371751	3.69e-10	-1.55562	0.226411	7.42e-09
	ONLI_0897	Tryptophan	HILICPOS	QIVBCDIJIAJPQS-VIFPVBQESA-N	6305	C1=CC=C2C(=C1)C(=CN2)C[C@@H](C(=O)O)N	20	20	0.839982	0.975446	5.31e-09	-1.49179	0.600305	4.97e-08
	ONLI_0899	Valine	HILICPOS	KZSNJWFQEVHDMF-BYPYZUCNSA-N	6287	CC(C)[C@@H](C(=O)O)N	20	20	0.653758	0.841929	0.271607	-0.343963	0.922349	0.384936
	ONLI_0908	10-Hydroxydecanoic acid	HILICNEG	YJCJVMMDTBEITC-UHFFFAOYSA-N	74300	C(CCCCC(=O)O)CCCCO	20	20	0.781781	0.765349	0.28973	-0.331436	0.775675	0.406329
	ONLI_0914	2,6-Dihydroxybenzoic acid	HILICNEG	AKEUNCKRJATALU-UHFFFAOYSA-N	9338	C1=CC(=C(C(=C1)O)C(=O)O)O	20	20	0.455052	0.293895	0.295241	-0.327728	0.86295	0.413337
	ONLI_0916	2-Deoxyuridine	HILICNEG	MXHRCPNRJAMMIM-SHYZEUOFSA-N	13712	C1[C@@H]([C@H](O[C@H]1N2C=CC(=O)NC2=O)CO)O	20	20	0.912347	0.569136	0.207042	-0.393761	0.802778	0.309218
	ONLI_0917	2-Hydroxy-3-methylbutyric acid	HILICNEG	NGEWQZIDQIYUNV-UHFFFAOYSA-N	99823	CC(C)C(C(=O)O)O	19	19	0.990202	0.978614	3.33e-05	-1.13672	0.673207	0.000121861
	ONLI_0918	2-Hydroxy-4-methylpentanoic acid	HILICNEG	LVRFTAZAXQPQHI-UHFFFAOYSA-N	92779	CC(C)CC(C(=O)O)O	20	19	0.284188	0.972606	0.000582688	0.985266	2.1755	0.00159546
	ONLI_0919	2-Hydroxyisobutyric acid	HILICNEG	BWLBGMIXKSTLSX-UHFFFAOYSA-N	11671	CC(C)(C(=O)O)O	20	20	0.59364	0.618501	0.875466	0.0494216	1.01517	0.91884
	ONLI_0920	2-Hydroxyquinoline	HILICNEG	LISFMEBWQUVKPJ-UHFFFAOYSA-N	6038	C1=CC=C2C(=C1)C=CC(=O)N2	20	20	0.999936	0.989807	6.44e-05	-1.13715	0.425787	0.000219767
	ONLI_0923	3-Hydroxy-4-methoxybenzoic acid	HILICNEG	LBKFGYZQBSGRHY-UHFFFAOYSA-N	12575	COC1=C(C=C(C=C1)C(=O)O)O	20	20	0.962806	0.992269	0.0239854	-0.688415	0.615771	0.0468648
	ONLI_0924	3-Hydroxyoctanoic acid	HILICNEG	NDPLAKGOSZHTPH-UHFFFAOYSA-N	26613	CCCCCC(CC(=O)O)O	20	20	0.87277	0.583698	0.041575	-0.625272	0.685951	0.0755393
	ONLI_0928	3-Methylhistidine	HILICNEG	JDHILDINMRGULE-LURJTMIESA-N	64969	CN1C=NC=C1C[C@@H](C(=O)O)N	20	20	0.932396	0.877171	0.781643	-0.0873778	0.924507	0.846868
	ONLI_0929	3-Phenyllactic acid	HILICNEG	VOXXWSYKYCBWHO-UHFFFAOYSA-N	3848	C1=CC=C(C=C1)CC(C(=O)O)O	20	20	0.78198	0.744382	0.879303	-0.0478874	0.952418	0.921665
	ONLI_0931	4-Acetylbutyric acid	HILICNEG	MGTZCLMLSSAXLD-UHFFFAOYSA-N	18407	CC(=O)CCCC(=O)O	20	20	0.995468	0.945847	0.527291	-0.198849	1.02541	0.638373
	ONLI_0932	4-Hydroxybenzoic acid	HILICNEG	FJKROLUGYXJWQN-UHFFFAOYSA-N	135	C1=CC(=CC=C1C(=O)O)O	20	20	0.944127	0.935272	0.0122359	-0.758167	0.576776	0.025518
	ONLI_0934	4-Methylcatechol	HILICNEG	ZBCATMYQYDCTIZ-UHFFFAOYSA-N	9958	CC1=CC(=C(C=C1)O)O	19	20	0.861843	0.92999	0.940955	-0.0224027	1.04106	0.957609
	ONLI_0935	4-Pyridoxic acid	HILICNEG	HXACOUQIXZGNBF-UHFFFAOYSA-N	6723	CC1=NC=C(C(=C1O)C(=O)O)CO	20	20	0.999102	0.99964	0.000634254	-0.998778	0.596537	0.00171334
	ONLI_0936	5,8,11,14-Eicosatetraenoic acid, 16-hydroxy-, 5Z,8Z,11Z,14Z,16R-	HILICNEG	JEKNPVYFNMZRJG-STHMYGMFSA-N	9548884	CCCC[C@H](/C=C\C/C=C\C/C=C\C/C=C\CCCC(=O)O)O	20	20	0.927664	0.836647	0.366139	-0.28349	0.857763	0.486373
	ONLI_0938	6-Hydroxycaproic acid	HILICNEG	IWHLYPDWHHPVAA-UHFFFAOYSA-N	14490	C(CCC(=O)O)CCO	20	20	0.999915	0.999226	0.000387327	-1.03134	0.51016	0.0011096
	ONLI_0943	Allantoin	HILICNEG	POJWUDADGALRAB-UHFFFAOYSA-N	204	C1(C(=O)NC(=O)N1)NC(=O)N	20	20	0.994412	0.999879	0.032734	-0.653486	0.785854	0.0618061
	ONLI_0949	Azelaic acid	HILICNEG	BDJRBEYXGGNYIS-UHFFFAOYSA-N	2266	C(CCCC(=O)O)CCCC(=O)O	20	20	0.860201	0.839115	0.258939	-0.353049	0.826409	0.37289
	ONLI_0954	Citraconic acid	HILICNEG	HNEGQIOMVPPMNR-IHWYPQMZSA-N	643798	C/C(=C/C(=O)O)/C(=O)O	20	20	0.526021	0.647735	0.915525	-0.0334529	0.846298	0.943659
	ONLI_0965	Ethyl-beta-glucuronide	HILICNEG	IWJBVMJWSPZNJH-UQGZVRACSA-N	18392195	CCO[C@H]1[C@@H]([C@H]([C@@H]([C@H](O1)C(=O)O)O)O)O	20	20	0.9154	0.442119	0.794889	-0.0819572	0.955212	0.857756
	ONLI_0966	Ferulic acid	HILICNEG	KSEBMYQBYZTDHS-HWKANZROSA-N	445858	COC1=C(C=CC(=C1)/C=C/C(=O)O)O	20	20	0.574404	0.818555	0.150827	-0.446936	0.687807	0.237604
	ONLI_0968	Galactonic acid	HILICNEG	RGHNJXZEOKUKBD-MGCNEYSASA-N	128869	C([C@H]([C@@H]([C@@H]([C@H](C(=O)O)O)O)O)O)O	20	20	0.354562	0.750967	0.089785	-0.515655	0.810133	0.152483
	ONLI_0969	Galactose	HILICNEG	WQZGKKKJIJFFOK-FPRJBGLDSA-N	439353	C([C@@H]1[C@@H]([C@@H]([C@H]([C@@H](O1)O)O)O)O)O	19	20	0.839199	0.999867	0.569475	0.171668	0.996087	0.672181
	ONLI_0972	Gentisinic acid	HILICNEG	WXTMDXOMEHJXQO-UHFFFAOYSA-N	3469	C1=CC(=C(C=C1O)C(=O)O)O	20	20	0.438332	0.323784	0.0271586	-0.674666	0.769149	0.052054
	ONLI_0988	Guanidinoacetic acid	HILICNEG	BPMFZUMJYQTVII-UHFFFAOYSA-N	763	C(C(=O)O)N=C(N)N	20	20	0.881733	0.726531	0.302346	-0.323013	0.852144	0.42036
	ONLI_0989	Hexanoylglycine	HILICNEG	UPCKIPHSXMXJOX-UHFFFAOYSA-N	99463	CCCCCC(=O)NCC(=O)O	19	19	0.198091	0.998562	0.00320703	0.799784	1.72078	0.00752669
	ONLI_0993	Homovanillic acid	HILICNEG	QRMZSPFSDQBLIX-UHFFFAOYSA-N	1738	COC1=C(C=CC(=C1)CC(=O)O)O	20	20	0.0832884	0.988028	0.145104	-0.4359	0.971196	0.229938
	ONLI_0995	Indole-3-carboxylic acid	HILICNEG	KMAKOBLIOCQGJP-UHFFFAOYSA-N	69867	C1=CC=C2C(=C1)C(=CN2)C(=O)O	20	20	0.763759	0.98957	0.0148544	-0.734951	0.668377	0.0301965
	ONLI_1000	Ketoisovaleric acid	HILICNEG	QHKABHOOEWYVLI-UHFFFAOYSA-N	49	CC(C)C(=O)C(=O)O	20	20	0.979856	0.841613	0.755456	-0.0981695	0.94905	0.82628
	ONLI_1001	Kynurenic acid	HILICNEG	HCZHHEIFKROPDY-UHFFFAOYSA-N	3845	C1=CC=C2C(=C1)C(=O)C=C(N2)C(=O)O	20	20	0.922638	0.840847	0.893111	-0.0423751	0.926866	0.931288
	ONLI_1010	Mannitol	HILICNEG	FBPFZTCFMRRESA-KVTDHHQDSA-N	6251	C([C@H]([C@H]([C@@H]([C@@H](CO)O)O)O)O)O	20	19	0.76776	0.277244	0.326585	0.294773	0.976788	0.447872
	ONLI_1015	N-Acetylglycine	HILICNEG	OKJIRPAQVSHGFK-UHFFFAOYSA-N	10972	CC(=O)NCC(=O)O	20	19	0.884015	0.857448	0.0360577	0.615397	1.41707	0.0665744
	ONLI_1016	N-Acetylhistidine	HILICNEG	KBOJOGQFRVVWBH-UHFFFAOYSA-N	273260	CC(=O)NC(CC1=CN=CN1)C(=O)O	20	20	0.449819	0.677	0.567755	-0.179816	0.856778	0.671135
	ONLI_1017	N-Acetyl-L-tyrosine	HILICNEG	CAHKINHBCWCHCF-JTQLQIEISA-N	68310	CC(=O)N[C@@H](CC1=CC=C(C=C1)O)C(=O)O	20	20	0.952269	0.98074	0.126889	-0.474058	0.724071	0.205645
	ONLI_1021	N-epsilon-Acetyllysine	HILICNEG	DTERQYGMUDWYAZ-ZETCQYMHSA-N	92832	CC(=O)NCCCC[C@@H](C(=O)O)N	20	20	0.960775	0.994013	0.087794	-0.528125	0.79096	0.149417
	ONLI_1022	N-Isovalerylglycine	HILICNEG	ZRQXMKMBBMNNQC-UHFFFAOYSA-N	546304	CC(C)CC(=O)NCC(=O)O	19	20	0.697627	0.843195	0.145746	0.433687	1.33099	0.230502
	ONLI_1026	Orotic acid	HILICNEG	PXQPEWDEAKTCGB-UHFFFAOYSA-N	967	C1=C(NC(=O)NC1=O)C(=O)O	20	19	0.555677	0.775816	0.000480507	0.973542	1.638	0.00134776
	ONLI_1028	Phenyl glucuronide	HILICNEG	WVHAUDNUGBNUDZ-GOVZDWNOSA-N	87235	C1=CC=C(C=C1)O[C@H]2[C@@H]([C@H]([C@@H]([C@H](O2)C(=O)O)O)O)O	20	20	0.825913	0.453111	0.497186	0.213477	1.74082	0.613857
	ONLI_1031	Phenylpyruvic acid	HILICNEG	BTNMPGBKDVTSJY-UHFFFAOYSA-N	997	C1=CC=C(C=C1)CC(=O)C(=O)O	20	20	0.45672	0.739079	0.332119	-0.303974	0.645412	0.453146
	ONLI_1038	Ser-Asn	HILICNEG	LTFSLKWFMWZEBD-UHFFFAOYSA-N	13071897	C(C(C(=O)O)NC(=O)C(CO)N)C(=O)N	20	20	0.0119968	0.0416429	0.455702	-0.211468	0.715969	0.575888
	ONLI_1041	Sorbose	HILICNEG	BJHIKXHVCXFQLS-OTWZMJIISA-N	6904	C([C@@H]([C@H]([C@@H](C(=O)CO)O)O)O)O	20	20	0.99739	0.976058	0.921355	-0.0311366	1.05933	0.947243
	ONLI_1042	S-Sulfocysteine	HILICNEG	NOKPBJYHPHHWAN-REOHCLBHSA-N	115015	C([C@@H](C(=O)O)N)SS(=O)(=O)O	19	20	0.636566	0.754693	0.387085	0.260269	1.44236	0.507533
	ONLI_1047	Theophylline	HILICNEG	ZFXYFBGIUFBOJW-UHFFFAOYSA-N	2153	CN1C2=C(C(=O)N(C1=O)C)NC=N2	20	20	0.251384	0.260447	0.692713	0.118905	1.22108	0.780095
	ONLI_1051	Thymidine	HILICNEG	IQFYYKKMVGJFEH-XLPZGREQSA-N	5789	CC1=CN(C(=O)NC1=O)[C@H]2C[C@@H]([C@H](O2)CO)O	20	20	0.586345	0.35243	0.218874	-0.383912	0.840628	0.322109
	ONLI_1053	trans-Traumatic acid	HILICNEG	MAZWDMBCPDUFDJ-VQHVLOKHSA-N	5283028	C(CCCCC(=O)O)CCC/C=C/C(=O)O	19	20	0.766531	0.985774	0.431463	0.236939	1.30715	0.549569
	ONLI_1059	Val-Asp	HILICNEG	OBTCMSPFOITUIJ-UHFFFAOYSA-N	9964657	CC(C)C(C(=O)NC(CC(=O)O)C(=O)O)N	20	20	0.00682628	0.00303332	0.634068	0.132743	1.05852	0.732317
	ONLI_1064	corticosterone	BileAcid_Steroids	OMFXVFTZEKFJBZ-HJTSIMOOSA-N	5753	C[C@]12CCC(=O)C=C1CC[C@@H]3[C@@H]2[C@H](C[C@]4([C@H]3CC[C@@H]4C(=O)CO)C)O	19	20	0.45836	0.528931	0.0764295	-0.52456	0.563396	0.131747
	ONLI_1065	progesterone	BileAcid_Steroids	RJKFOVLPORLFTN-LEKSSAKUSA-N	5994	CC(=O)[C@H]1CC[C@@H]2[C@@]1(CC[C@H]3[C@H]2CCC4=CC(=O)CC[C@]34C)C	20	20	0.000132559	0.0744031	0.00403567	-0.753209	0.320363	0.00920316
	ONLI_1069	testosterone	BileAcid_Steroids	MUMGGOZAMZWBJJ-DYKIIFRCSA-N	6013	C[C@]12CC[C@H]3[C@H]([C@@H]1CC[C@@H]2O)CCC4=CC(=O)CC[C@]34C	20	20	0.0100791		2.44e-05	0.908793	5.92456	9.24e-05
	ONLI_1071	cortexone	BileAcid_Steroids	ZESRJSPZRDMNHY-YFWFAHHUSA-N	6166	C[C@]12CC[C@H]3[C@H]([C@@H]1CC[C@@H]2C(=O)CO)CCC4=CC(=O)CC[C@]34C	20	20	0.0010276	0.012898	0.276984	-0.298279	0.409106	0.390495
	ONLI_1092	Tauro-omega-Muricholic acid	BileAcid_Steroids	XSOLDPYUICCHJX-SYCKBGHMSA-N	118703092	C[C@H](CCC(=O)NCCS(=O)(=O)O)[C@H]1CC[C@@H]2[C@@]1(CC[C@H]3[C@H]2[C@H]([C@@H]([C@H]4[C@@]3(CC[C@H](C4)O)C)O)O)C	20	19	0.650153	0.630713	0.000528434	-0.955296	0.526778	0.00145681
	ONLI_1093	Tauro-a-Muricholic acid	BileAcid_Steroids	DKPMWHFRUGMUKF-LPMPYYIQSA-N	53477700	C[C@H](CCC(=O)O)C1CC[C@@H]2[C@@]1(CC[C@H]3[C@H]2[C@@H]([C@H]([C@H]4[C@@]3(CC[C@H](C4)O)C)O)O)C	19	17	0.181727	0.993967	0.0499366	-0.519872	0.596862	0.0885439
	ONLI_1094	Tauro-ÃŸ-Muricholic acid	BileAcid_Steroids	XSOLDPYUICCHJX-OEYGYFRSSA-N	168408	C[C@H](CCC(=O)NCCS(=O)(=O)O)[C@H]1CCC2[C@@]1(CCC3C2[C@H]([C@H]([C@H]4[C@@]3(CC[C@H](C4)O)C)O)O)C	20	20	0.221292	0.505508	0.0472118	-0.602674	10.6223	0.0842694
	ONLI_1095	Tauroursodeoxycholic acid	BileAcid_Steroids	BHTRKEVKTKCXOH-VSHSPWMTSA-N	12443252	C[C@H](CCC(=O)NCCS(=O)(=O)O)[C@H]1CC[C@@H]2[C@@]1(CC[C@H]3[C@H]2[C@H](CC4[C@@]3(CC[C@H](C4)O)C)O)C	20	20	0.00352542	0.00612976	0.0339222	-0.575007	0.315041	0.0633582
	ONLI_1096	Taurocholic acid	BileAcid_Steroids	WBWWGRHZICKQGZ-HZAMXZRMSA-N	6675	C[C@H](CCC(=O)NCCS(=O)(=O)O)[C@H]1CC[C@@H]2[C@@]1([C@H](C[C@H]3[C@H]2[C@@H](C[C@H]4[C@@]3(CC[C@H](C4)O)C)O)O)C	20	19	0.870413	0.729886	0.00201873	-0.864866	0.417994	0.00496849
	ONLI_1097	omega-Muricholic acid	BileAcid_Steroids	DKPMWHFRUGMUKF-NTPBNISXSA-N	5283851	C[C@H](CCC(=O)O)[C@H]1CC[C@@H]2[C@@]1(CC[C@H]3[C@H]2[C@H]([C@@H]([C@H]4[C@@]3(CC[C@H](C4)O)C)O)O)C	20	20	0.0453151	0.135524	0.0780845	-0.508027	0.0631951	0.134026
	ONLI_1098	Glycoursodeoxycholic acid	BileAcid_Steroids	GHCZAUBVMUEKKP-XROMFQGDSA-N	12310288	C[C@H](CCC(=O)NCC(=O)O)[C@H]1CC[C@@H]2[C@@]1(CC[C@H]3[C@H]2[C@H](C[C@H]4[C@@]3(CC[C@H](C4)O)C)O)C	20	20	0.75953	0.812391	0.199829	-0.399959	0.377636	0.300677
	ONLI_1101	Glycocholic acid	BileAcid_Steroids	RFDAIACWWDREDC-FRVQLJSFSA-N	10140	C[C@H](CCC(=O)NCC(=O)O)[C@H]1CC[C@@H]2[C@@]1([C@H](C[C@H]3[C@H]2[C@@H](C[C@H]4[C@@]3(CC[C@H](C4)O)C)O)O)C	20	20	8.28e-06	0.00975091	0.00553985	-0.697643	0.252586	0.0123193
	ONLI_1102	ÃŸ-Muricholic acid	BileAcid_Steroids	DKPMWHFRUGMUKF-CRKPLTDNSA-N	5283853	C[C@H](CCC(=O)O)[C@H]1CC[C@@H]2[C@@]1(CC[C@H]3[C@H]2[C@H]([C@H]([C@H]4[C@@]3(CC[C@H](C4)O)C)O)O)C	20	20	0.193931	0.0911915	0.982839	-0.00647874	0.211363	0.986516
	ONLI_1103	Taurochenodeoxycholic acid	BileAcid_Steroids	BHTRKEVKTKCXOH-BJLOMENOSA-N	387316	C[C@H](CCC(=O)NCCS(=O)(=O)O)[C@H]1CC[C@@H]2[C@@]1(CC[C@H]3[C@H]2[C@@H](C[C@H]4[C@@]3(CC[C@H](C4)O)C)O)C	18	16	0.0252535	0.984157	0.422982	-0.221006	1.14514	0.540477
	ONLI_1104	Taurodeoxycholic acid	BileAcid_Steroids	AWDRATDZQPNJFN-VAYUFCLWSA-N	2733768	C[C@H](CCC(=O)NCCS(=O)(=O)O)[C@H]1CC[C@@H]2[C@@]1([C@H](C[C@H]3[C@H]2CC[C@H]4[C@@]3(CC[C@H](C4)O)C)O)C	20	20	0.515201	0.99393	0.70937	-0.116115	2.13607	0.793115
	ONLI_1105	Cholic acid	BileAcid_Steroids	BHQCQFFYRZLCQQ-OELDTZBJSA-N	221493	C[C@H](CCC(=O)O)[C@H]1CC[C@@H]2[C@@]1([C@H](C[C@H]3[C@H]2[C@@H](C[C@H]4[C@@]3(CC[C@H](C4)O)C)O)O)C	20	19	0.503152	0.699063	0.248716	-0.343692	0.51553	0.360473
	ONLI_1106	Ursodeoxycholic acid	BileAcid_Steroids	RUDATBOHQWOJDD-UZVSRGJWSA-N	31401	C[C@H](CCC(=O)O)[C@H]1CC[C@@H]2[C@@]1(CC[C@H]3[C@H]2[C@H](C[C@H]4[C@@]3(CC[C@H](C4)O)C)O)C	20	19	4.16e-08	0.00423404	0.0255962	-0.546223	0.981463	0.0496504
	ONLI_1108	Glycodeoxycholic acid	BileAcid_Steroids	HDZZVAMISRMYHH-UHFFFAOYSA-N	5604	C1=CN(C2=NC=NC(=C21)N)C3C(C(C(O3)CO)O)O	20	20	0.00226362	0.000782971	0.725772	-0.095927	0.926765	0.805857
	ONLI_1110	Chenodeoxycholic acid	BileAcid_Steroids	RUDATBOHQWOJDD-BSWAIDMHSA-N	10133	C[C@H](CCC(=O)O)[C@H]1CC[C@@H]2[C@@]1(CC[C@H]3[C@H]2[C@@H](C[C@H]4[C@@]3(CC[C@H](C4)O)C)O)C	20	20	0.906874	0.812803	0.00243155	-0.895688	0.345643	0.00587807
	ONLI_1111	Deoxycholic acid	BileAcid_Steroids	KXGVEGMKQFWNSR-LLQZFEROSA-N	222528	C[C@H](CCC(=O)O)[C@H]1CC[C@@H]2[C@@]1([C@H](C[C@H]3[C@H]2CC[C@H]4[C@@]3(CC[C@H](C4)O)C)O)C	20	20	0.336206	0.984095	0.314114	-0.307685	0.805153	0.43447
	ONLI_1125	TXB2	Oxylipins	XNRNNGPBEPRNAR-JQBLCGNGSA-N	5283137	CCCCC[C@@H](/C=C/[C@@H]1[C@H]([C@H](CC(O1)O)O)C/C=C\CCCC(=O)O)O	20	20	0.644893	0.278491	0.766408	0.0900719	1.27054	0.835987
	ONLI_1129	PGD2	Oxylipins	BHMBVRSPMRCCGG-OUTUXVNYSA-N	448457	CCCCC[C@@H](/C=C/[C@@H]1[C@H]([C@H](CC1=O)O)C/C=C\CCCC(=O)O)O	20	20	3.3e-05	0.00293066	0.451206	-0.19856	1.09693	0.571102
	ONLI_1133	PGE3	Oxylipins	CBOMORHDRONZRN-QLOYDKTKSA-N	5280937	CC/C=C\C[C@@H](/C=C/[C@H]1[C@@H](CC(=O)[C@@H]1C/C=C\CCCC(=O)O)O)O	20	20	3.81e-05	0.000139508	0.369425	-0.226784	0.533278	0.489854
	ONLI_1134	PGF3alpha	Oxylipins	SAKGBZWJAIABSY-SAMSIYEGSA-N	5280940	CC/C=C\C[C@@H](/C=C/[C@H]1[C@@H](C[C@@H]([C@@H]1C/C=C\CCCC(=O)O)O)O)O	20	19	5.28e-09	0.00742134	0.00310965	-0.705626	0.597791	0.00736255
	ONLI_1135	9,12,13-TriHOME	Oxylipins	MDIUMSLCYIJBQC-MVFSOIOZSA-N	9858729	CCCCC[C@@H]([C@H](/C=C/[C@H](CCCCCCCC(=O)O)O)O)O	20	20	0.853786	0.90125	0.840309	0.063522	0.981116	0.894745
	ONLI_1138	9,10-e-DiHO	Oxylipins	VACHUYIREGFMSP-SJORKVTESA-N	441460	CCCCCCCC[C@H]([C@H](CCCCCCCC(=O)O)O)O	20	20	0.708401	0.97788	0.771475	0.0915559	0.887884	0.838107
	ONLI_1139	12_13-DiHOME	Oxylipins	CQSLTKIXAJTQGA-FLIBITNWSA-N	10236635	CCCCCC(C(C/C=C\CCCCCCCC(=O)O)O)O	20	20	0.989423	0.974759	0.966016	-0.0134375	1.04197	0.975712
	ONLI_1140	9,10-DiHOME	Oxylipins	XEBKSQSGNGRGDW-YFHOEESVSA-N	9966640	CCCCC/C=C\CC(C(CCCCCCCC(=O)O)O)O	19	20	0.799218	0.722657	0.517805	-0.195053	0.926281	0.629657
	ONLI_1141	15,16-DiHODE	Oxylipins	LKLLJYJTYPVCID-OHPMOLHNSA-N	16061068	CCC(C(C/C=C\C/C=C\CCCCCCCC(=O)O)O)O	20	20	0.531591	0.861967	0.472338	0.225893	1.03196	0.592262
	ONLI_1142	12,13-DiHODE	Oxylipins	RGRKFKRAFZJQMS-OOHFSOINSA-N	16061067	CC/C=C\CC(C(C/C=C\CCCCCCCC(=O)O)O)O	19	20	0.582414	0.667819	0.126963	0.441905	1.2034	0.205645
	ONLI_1143	9,10-DiHODE	Oxylipins	QRHSEDZBZMZPOA-ZJSQCTGTSA-N	16061066	CC/C=C\C/C=C\CC(C(CCCCCCCC(=O)O)O)O	20	20	0.726325	0.975783	0.854282	0.057881	0.934829	0.903995
	ONLI_1144	14,15-DiHETrE	Oxylipins	SYAWGTIVOGUZMM-ILYOTBPNSA-N	5283147	CCCCCC(C(C/C=C\C/C=C\C/C=C\CCCC(=O)O)O)O	20	20	0.997748	0.996027	0.0325955	-0.652507	0.809796	0.0617398
	ONLI_1145	11,12-DiHETrE	Oxylipins	LRPPQRCHCPFBPE-KROJNAHFSA-N	5283146	CCCCC/C=C\CC(C(C/C=C\C/C=C\CCCC(=O)O)O)O	20	20	0.731676	0.957931	0.000222819	-1.05953	0.678491	0.000664331
	ONLI_1146	8,9-DiHETrE	Oxylipins	DCJBINATHQHPKO-TYAUOURKSA-N	5283144	CCCCC/C=C\C/C=C\CC(C(C/C=C\CCCC(=O)O)O)O	20	20	0.999398	0.996744	1.41e-06	-1.31194	0.631389	6.97e-06
	ONLI_1147	5,6-DiHETrE	Oxylipins	GFNYAPAJUNPMGH-QNEBEIHSSA-N	5283142	CCCCC/C=C\C/C=C\C/C=C\CC(C(CCCC(=O)O)O)O	20	20	0.989298	0.991871	2.63e-06	-1.28624	0.627774	1.21e-05
	ONLI_1148	17,18-DiHETE	Oxylipins	XYDVGNAQQFWZEF-JPURVOHMSA-N	16061120	CCC(C(C/C=C\C/C=C\C/C=C\C/C=C\CCCC(=O)O)O)O	20	20	0.999979	0.997406	0.035154	-0.645177	0.803903	0.0653555
	ONLI_1149	14,15-DiHETE	Oxylipins	BLWCDFIELVFRJY-QXBXTPPVSA-N	16061119	CC/C=C\CC(C(C/C=C\C/C=C\C/C=C\CCCC(=O)O)O)O	20	20	0.975542	0.881759	0.398538	-0.264984	0.922003	0.517457
	ONLI_1150	19,20-DiHDPE	Oxylipins	FFXKPSNQCPNORO-MBYQGORISA-N	16061148	CCC(C(C/C=C\C/C=C\C/C=C\C/C=C\C/C=C\CCC(=O)O)O)O	20	20	0.821294	0.978112	0.0151562	-0.736762	0.787143	0.0307323
	ONLI_1153	6-trans-LTB4	Oxylipins	VNYSSYRCGWBHLG-UKNWISKWSA-N	5283128	CCCCC/C=C\C[C@H](/C=C/C=C/C=C/[C@H](CCCC(=O)O)O)O	20	20	3.24e-05	2.76e-05	0.994116	-0.001843	1.04835	0.994116
	ONLI_1156	13S-HODE	Oxylipins	HNICUWMFWZBIFP-IRQZEAMPSA-N	6443013	CCCCC[C@@H](/C=C/C=C\CCCCCCCC(=O)O)O	20	20	0.955015	0.907962	0.504164	0.210048	1.26238	0.619715
	ONLI_1157	9-HODE	Oxylipins	NPDSHTNEKLQQIJ-SIGMCMEVSA-N	5282945	CCCCC/C=C/C=C/C(CCCCCCCC(=O)O)O	20	19	0.923708	0.897957	0.925733	0.0288936	0.884691	0.95053
	ONLI_1158	13-HOTE	Oxylipins	KLLGGGQNRTVBSU-JDTPQGGVSA-N	10469728	CC/C=C\CC(/C=C/C=C\CCCCCCCC(=O)O)O	20	20	0.493428	0.615624	0.0651614	0.56866	1.67881	0.113539
	ONLI_1159	9-HOTE	Oxylipins	YUPHIKSLGBATJK-OBKPXJAFSA-N	53480359	CC/C=C\CC/C=C/C=C(\CCCCCCCC(=O)O)/O	20	20	0.957264	0.999883	0.946622	0.0211154	0.938214	0.960748
	ONLI_1161	15-HETE	Oxylipins	JSFATNQSLKRBCI-VAEKSGALSA-N	5280724	CCCCC[C@@H](/C=C/C=C\C/C=C\C/C=C\CCCC(=O)O)O	20	20	0.837327	0.60411	0.359366	-0.287369	1.13644	0.479829
	ONLI_1162	12S-HETE	Oxylipins	ZNHVWPKMFKADKW-LQWMCKPYSA-N	5283155	CCCCC/C=C\C[C@@H](/C=C/C=C\C/C=C\CCCC(=O)O)O	20	20	0.983343	0.997757	0.736634	-0.105994	1.61081	0.815667
	ONLI_1163	8S-HETE	Oxylipins	NLUNAYAEIJYXRB-VYOQERLCSA-N	5283154	CCCCC/C=C\C/C=C\C=C\[C@H](C/C=C\CCCC(=O)O)O	20	20	0.742989	0.817928	0.0225992	-0.694599	0.729191	0.0443717
	ONLI_1164	11-HETE	Oxylipins	GCZRCCHPLVMMJE-RSPKXIRXSA-N	5312981	CCCCC/C=C\C=C/[C@@H](C/C=C\C/C=C/CCCC(=O)O)O	20	20	0.84853	0.381159	0.192157	-0.406543	1.18391	0.290219
	ONLI_1165	9-HETE	Oxylipins	KATOYYZUTNAWSA-DLJQHUEDSA-N	5312978	CCCCC/C=C\C/C=C\CC(/C=C\C=C\CCCC(=O)O)O	20	20	0.0953683	0.999748	0.0416639	-0.605304	0.809264	0.0755393
	ONLI_1166	5-HETE	Oxylipins	KGIJOOYOSFUGPC-JGKLHWIESA-N	5280733	CCCCC/C=C\C/C=C\C/C=C\C=C\[C@H](CCCC(=O)O)O	20	20	0.997938	0.98101	0.595985	-0.166907	0.966654	0.697337
	ONLI_1167	15-HEPE	Oxylipins	UDXLGBLAJBYLSZ-XBCQTNLFSA-N	53480357	CC/C=C\C(C/C=C/C=C\C/C=C\C/C=C\CCCC(=O)O)O	20	20	0.00146751	9.87e-05	0.359425	0.240957	1.57016	0.479829
	ONLI_1168	12S-HEPE	Oxylipins	MCRJLMXYVFDXLS-QGQBRVLBSA-N	10041593	CC/C=C\C/C=C\CC(/C=C/C=C\C/C=C\CCCC(=O)O)O	20	20	0.964122	0.978277	0.316368	0.31391	1.87263	0.436837
	ONLI_1170	5S-HEPE	Oxylipins	FTAGQROYQYQRHF-FCWZHQICSA-N	6439678	CC/C=C\C/C=C\C/C=C\C/C=C\C=C\C(CCCC(=O)O)O	20	20	0.0445349	0.576235	0.345883	-0.280087	0.852622	0.467174
	ONLI_1171	17-HDoHE	Oxylipins	SWTYBBUBEPPYCX-VIIQGJSXSA-N	6439179	CC/C=C\CC(/C=C/C=C\C/C=C\C/C=C\C/C=C\CCC(=O)O)O	20	20	0.0973755	0.450954	0.968852	-0.0118469	1.55274	0.977351
	ONLI_1172	14-HDoHE	Oxylipins	ZNEBXONKCYFJAF-BGKMTWLOSA-N	11566378	CC/C=C\C/C=C\CC(/C=C/C=C\C/C=C\C/C=C\CCC(=O)O)O	20	20	0.960482	0.830435	0.853533	-0.0582141	1.58672	0.903995
	ONLI_1173	4-HDoHE	Oxylipins	IFRKCNPQVIJFAQ-PQVBWYSWSA-N	14429109	CC/C=C\C/C=C\C/C=C\C/C=C\C/C=C\C=C\C(CCC(=O)O)O	20	20	0.998484	0.98	0.265118	0.348571	1.24241	0.380428
	ONLI_1174	13-KODE	Oxylipins	JHXAZBBVQSRKJR-BSZOFBHHSA-N	6446027	CCCCCC(=O)/C=C/C=C\CCCCCCCC(=O)O	20	20	0.000400655	0.000348728	0.828411	0.0573159	1.03005	0.886796
	ONLI_1175	9-KODE	Oxylipins	LUZSWWYKKLTDHU-ZJHFMPGASA-N	9839084	CCCCC/C=C\C=C\C(=O)CCCCCCCC(=O)O	20	20	0.779995	0.694324	0.35809	-0.288231	0.783517	0.479829
	ONLI_1176	15-KETE	Oxylipins	YGJTUEISKATQSM-USWFWKISSA-N	5280701	CCCCCC(=O)/C=C/C=C\C/C=C\C/C=C\CCCC(=O)O	20	20	4.21e-05	4.18e-05	0.573564	-0.140454	0.92	0.675028
	ONLI_1179	1213Ep-9-KODE	Oxylipins	RCMABBHQYMBYKV-BUHFOSPRSA-N	5283007	CCCCCC1C(O1)/C=C/C(=O)CCCCCCCC(=O)O	20	20	0.071888	0.00325426	0.543987	-0.172237	0.531294	0.653597
	ONLI_1180	1213-EpOME	Oxylipins	CCPPLLJZDQAOHD-FLIBITNWSA-N	5356421	CCCCCC1C(O1)C/C=C\CCCCCCCC(=O)O	20	20	0.961719	0.999306	0.409085	-0.259185	0.929344	0.526901
	ONLI_1181	910-EpOME	Oxylipins	FBUKMFOXMZRGRB-YFHOEESVSA-N	6246154	CCCCC/C=C\CC1C(O1)CCCCCCCC(=O)O	20	20	0.985535	0.978185	0.0735028	-0.552453	0.823777	0.127247
	ONLI_1182	15,16-EpODE	Oxylipins	HKSDVVJONLXYKL-OHPMOLHNSA-N	16061062	CCC1C(O1)C/C=C\C/C=C\CCCCCCCC(=O)O	20	19	0.833772	0.756155	0.378754	-0.264809	0.909712	0.500651
	ONLI_1184	alpha-12(13)-EpODE	Oxylipins	BKKGUKSHPCTUGE-OOHFSOINSA-N	16061061	CC/C=C\CC1C(O1)C/C=C\CCCCCCCC(=O)O	19	18	0.268446	0.593563	0.90664	0.0337899	1.00318	0.938798
	ONLI_1186	11,12-EpETrE	Oxylipins	DXOYQVHGIODESM-IQCOFVSKSA-N	53480479	CCCCC/C=C/CC1C(O1)C/C=C\C/C=C/CCCC(=O)O	20	20	0.990794	0.65092	9.38e-09	-1.47464	0.423984	7.95e-08
	ONLI_1187	89-EpETrE	Oxylipins	DBWQSCSXHFNTMO-TYAUOURKSA-N	5283203	CCCCC/C=C\C/C=C\CC1C(O1)C/C=C\CCCC(=O)O	20	20	0.984419	0.746914	1.89e-07	-1.37865	0.459791	1.13e-06
	ONLI_1188	1718-EpETE	Oxylipins	GPQVVJQEBXAKBJ-JPURVOHMSA-N	16061089	CCC1C(O1)C/C=C\C/C=C\C/C=C\C/C=C\CCCC(=O)O	19	20	0.00645522	0.618995	0.270155	-0.305826	0.803891	0.384911
	ONLI_1198	10-Nitrooleate	Oxylipins	WRADPCFZZWXOTI-BMRADRMJSA-N	24836820	CCCCCCCC/C(=C\CCCCCCCC(=O)O)/[N+](=O)[O-]	20	20	0.768314	0.976777	0.133232	0.466513	1.21088	0.213649
	ONLI_1200	10-Nitrolinoleate	Oxylipins	LELVHAQTWXTCLY-XYWKCAQWSA-N	5282259	CCCCC/C=C\C/C(=C\CCCCCCCC(=O)O)/[N+](=O)[O-]	19	20	0.00014912	1.34e-06	0.189426	0.319846	1.41795	0.287171

## Sheet: 2_after bw adjusted
	SI Data 3b. Sex as a Biological Variable in Metabolomics Data with Bodyweight as a Confounder for Wildtype Mice.
long column names	label	Metbaolites	Platform	InChiKey	PubChemID	SMILES	# of female WT mice	# of male WT mice	Normality of male WT mice after data transformation	Normality of female WT mice after data transformation	p value Male vs. Female	estimate of WT Male vs. Female	foldchange WT male vs. female	adjusted p value	comment of row3
short column names	label	Metbaolites	Platform	InChiKey	PubChemID	SMILES	F_Count	M_Count	Normality_M	Normality_F	p_value	Coefficient	fold_change	adjusted_p_value
	ONLI_0001	xylulose NIST	gctof	LQXVFWRQNMEDEE-PYHARJCCSA-N	439205	C1[C@@H]([C@H](C(O1)(CO)O)O)O	20	20	0.942862	0.890923	0.688232	-0.121362	1.00032	0.765879
	ONLI_0002	xylose	gctof	SRBFZHDQGSBBOR-IOVATXLUSA-N	135191	C1[C@H]([C@@H]([C@H](C(O1)O)O)O)O	20	20	0.994988	0.779798	0.389052	-0.270653	0.941643	0.512581
	ONLI_0003	xylitol	gctof	HEBKCHPVOIAQTA-NGQZWQHPSA-N	6912	C([C@H](C([C@H](CO)O)O)O)O	20	20	0.841637	0.894759	0.0040005	0.874275	1.20308	0.00930753
	ONLI_0005	uridine	gctof	DRTQHJPVMGBUCF-XVFCMESISA-N	6029	C1=CN(C(=O)NC1=O)[C@H]2[C@@H]([C@@H]([C@H](O2)CO)O)O	20	20	0.986966	0.99966	0.352133	0.297069	1.13732	0.473234
	ONLI_0006	uric acid	gctof	LEHOTFFKMJEONL-UHFFFAOYSA-N	1175	C12=C(NC(=O)N1)NC(=O)NC2=O	20	20	0.00144114	0.0821136	0.24633	-0.315805	0.67145	0.361194
	ONLI_0007	urea	gctof	XSQUKJJJFZCRTK-UHFFFAOYSA-N	1176	C(=O)(N)N	20	20	0.812026	0.993125	0.842992	0.0635964	1.01321	0.891257
	ONLI_0008	uracil	gctof	ISAKRJDGNUQOIC-UHFFFAOYSA-N	1174	C1=CNC(=O)NC1=O	20	20	0.975157	0.963078	0.707535	-0.117058	1.04195	0.781297
	ONLI_0009	tyrosine	gctof	OUYCCCASQSFEME-QMMMGPOBSA-N	6057	C1=CC(=CC=C1C[C@@H](C(=O)O)N)O	20	20	0.941839	0.590694	0.133132	-0.469126	0.87835	0.216071
	ONLI_0011	trans-4-hydroxyproline	gctof	PMMYEEVYMWASQN-DMTCNVIQSA-N	5810	C1[C@H](CN[C@@H]1C(=O)O)O	20	20	0.624214	0.594175	0.0636401	-0.573092	0.852932	0.111129
	ONLI_0012	thymine	gctof	RWQNBRDOKXIBIV-UHFFFAOYSA-N	1135	CC1=CNC(=O)NC1=O	20	19	0.273645	0.835338	0.00188134	-0.920198	0.759018	0.004718
	ONLI_0014	threonine	gctof	AYFVYJQAPQTCCC-GBXIJSLDSA-N	6288	C[C@H]([C@@H](C(=O)O)N)O	20	20	0.988429	0.96878	0.032802	-0.654728	0.81516	0.0616954
	ONLI_0015	threonic acid	gctof	LYEIRXNHQIDPMW-GUBZILKMSA-NÂ Â	497572	CC(=O)N[C@@H](CCC(=O)O)C(=O)N[C@@H](CCC(=O)O)C(=O)N[C@@H](CS)C(=O)O	20	20	0.724342	0.784577	0.301697	0.319727	1.0736	0.421643
	ONLI_0017	sulfuric acid	gctof	QAOWNCQODCNURD-UHFFFAOYSA-N	1118	OS(=O)(=O)O	20	20	0.999595	0.998767	0.585706	-0.170538	0.782609	0.689317
	ONLI_0018	sucrose	gctof	CZMRCDWAGMRECN-UGDNZRGBSA-N	5988	C([C@@H]1[C@H]([C@@H]([C@H]([C@H](O1)O[C@]2([C@H]([C@@H]([C@H](O2)CO)O)O)CO)O)O)O)O	19	20	0.86303	0.99995	0.626676	0.14418	1.35805	0.719649
	ONLI_0019	succinic acid	gctof	KDYFGRWQOYBRFD-UHFFFAOYSA-N	1110	C(CC(=O)O)C(=O)O	20	20	0.984564	0.992308	0.0392544	0.631687	1.22641	0.0726431
	ONLI_0020	stearic acid	gctof	QIQXTHQIDYTFRH-UHFFFAOYSA-N	5281	CCCCCCCCCCCCCCCCCC(=O)O	20	20	0.191152	0.335949	0.235907	0.375586	1.04679	0.347811
	ONLI_0022	saccharic acid	gctof	DSLZVSRJTYRBFB-LLEIAEIESA-N	33037	[C@H]([C@@H]([C@@H](C(=O)O)O)O)([C@H](C(=O)O)O)O	20	20	0.958293	0.849275	0.0884677	0.527104	1.24507	0.150563
	ONLI_0023	ribose	gctof	HMFHBZSHGGEWLO-SOOFDHNKSA-N	5779	C([C@@H]1[C@H]([C@H](C(O1)O)O)O)O	19	20	0.829934	0.94707	0.681247	-0.119378	1.14433	0.763794
	ONLI_0024	ribonic acid	gctof	QXKAIJAYHKCRRA-BXXZVTAOSA-N	5460677	C([C@H]([C@H]([C@H](C(=O)O)O)O)O)O	20	20	0.967037	0.996853	0.318863	-0.316944	0.911939	0.439685
	ONLI_0025	ribitol	gctof	HEBKCHPVOIAQTA-QWWZWVQMSA-N	94154	C([C@H](C([C@@H](CO)O)O)O)O	20	20	0.717484	0.980903	0.668306	0.13519	1.03523	0.752428
	ONLI_0026	raffinose	gctof	MUPFEKGTMRGPLJ-BQCSWRFHSA-N	10542	C([C@@H]1[C@@H]([C@@H]([C@H](C(O1)OC[C@@H]2[C@H]([C@@H]([C@H](C(O2)O[C@]3([C@H]([C@@H]([C@H](O3)CO)O)O)CO)O)O)O)O)O)O)O	20	20	0.927491	0.934216	0.829188	0.0668231	1.0441	0.880602
	ONLI_0027	pyruvic acid	gctof	LCTONWCANYUPML-UHFFFAOYSA-N	1060	CC(=O)C(=O)O	20	20	0.988602	0.913099	0.124319	0.471168	1.43078	0.202995
	ONLI_0028	pseudo uridine	gctof	PTJWIQPHWPFNBW-GBNDHIKLSA-N	15047	C1=C(C(=O)NC(=O)N1)[C@H]2[C@@H]([C@@H]([C@H](O2)CO)O)O	20	20	0.890787	0.673909	0.462493	-0.231792	0.915971	0.575436
	ONLI_0030	pinitol	gctof	DSCFFEYYQKSRSV-FEPQRWDDSA-N	164619	COC1[C@@H]([C@H](C([C@@H]([C@@H]1O)O)O)O)O	20	20	0.861464	0.629199	0.359644	-0.291344	0.880714	0.48092
	ONLI_0031	pimelic acid	gctof	WLJVNTCWHIRURA-UHFFFAOYSA-N	385	C(CCC(=O)O)CCC(=O)O	20	20	0.772472	0.981206	0.981928	0.00727488	1.00419	0.986832
	ONLI_0032	phosphate	gctof	NBIIXXVUZAFLBC-UHFFFAOYSA-N	1004	OP(=O)(O)O	19	20	0.517989	0.755767	0.121296	-0.464273	0.664473	0.198463
	ONLI_0033	phenylethylamine	gctof	BHHGXPLMPWCGHP-UHFFFAOYSA-N	1001	C1=CC=C(C=C1)CCN	20	20	0.806182	0.995363	0.317127	-0.315443	0.702306	0.439159
	ONLI_0034	phenylalanine	gctof	COLNVLDHVKWLRT-QMMMGPOBSA-N	6140	C1=CC=C(C=C1)C[C@@H](C(=O)O)N	20	20	0.683387	0.549047	0.509733	-0.209542	0.955057	0.622794
	ONLI_0035	phenol	gctof	ISWSIDIOOBJBQZ-UHFFFAOYSA-N	996	C1=CC=C(C=C1)O	20	20	0.660022	0.913967	0.842212	0.0634314	1.03133	0.891257
	ONLI_0036	pelargonic acid	gctof	FBUKVWPVBMHYJY-UHFFFAOYSA-N	8158	CCCCCCCCC(=O)O	20	20	0.956336	0.699973	0.571736	0.178347	1.03998	0.678621
	ONLI_0039	palmitic acid	gctof	IPCSVZSSVZVIGE-UHFFFAOYSA-N	985	CCCCCCCCCCCCCCCC(=O)O	20	20	0.996181	0.977664	0.49502	0.218472	1.0292	0.607573
	ONLI_0040	oxoproline	gctof	ODHCTXKNWHHXJC-VKHMYHEASA-N	7405	C1CC(=O)N[C@@H]1C(=O)O	20	20	0.997488	0.989193	0.597767	-0.169069	0.972718	0.696829
	ONLI_0041	oxalic acid	gctof	MUBZPKHOEPUJKR-UHFFFAOYSA-N	971	C(=O)(C(=O)O)O	20	19	2.69e-07	1.15e-05	0.228518	-0.262958	0.409506	0.338156
	ONLI_0042	ornithine	gctof	AHLPHDHHMVZTML-BYPYZUCNSA-N	6262	C(C[C@@H](C(=O)O)N)CN	20	20	0.524382	0.384027	0.191804	-0.408878	0.858324	0.291324
	ONLI_0044	octadecanol	gctof	GLDOVTGHNKAZLK-UHFFFAOYSA-N	8221	CCCCCCCCCCCCCCCCCCO	20	19	0.696143	0.465648	0.953653	0.0176156	0.770409	0.965648
	ONLI_0045	myristic acid	gctof	TUNFSRHWOTWDNC-UHFFFAOYSA-N	11005	CCCCCCCCCCCCCC(=O)O	20	20	0.908057	0.972934	0.437587	0.237532	1.0481	0.554387
	ONLI_0046	myo-inositol	gctof	CDAISMWEOUEBRE-UHFFFAOYSA-N	892	C1(C(C(C(C(C1O)O)O)O)O)O	19	20	0.818644	0.999046	0.840414	0.0599988	1.06962	0.891257
	ONLI_0047	methionine sulfoxide	gctof	QEFRNWWLZKMPFJ-UHFFFAOYSA-N	847	CS(=O)CCC(C(=O)O)N	20	20	0.977104	0.992168	0.156745	-0.447431	0.828896	0.244478
	ONLI_0048	methionine	gctof	FFEARJCKVFRZRR-BYPYZUCNSA-N	6137	CSCC[C@@H](C(=O)O)N	20	19	0.86873	0.591367	0.869155	0.0487656	0.96745	0.90876
	ONLI_0049	mannose	gctof	WQZGKKKJIJFFOK-QTVWNMPRSA-N	18950	C([C@@H]1[C@H]([C@@H]([C@@H](C(O1)O)O)O)O)O	20	20	0.875743	0.759427	0.672944	0.134635	1.0466	0.755537
	ONLI_0050	maltose	gctof	GUBGYTABKSRVRQ-DKBJLJRDSA-N	10991489	C([C@@H]1[C@H]([C@@H]([C@H]([C@H](O1)O[C@@H]2[C@H](O[C@@H]([C@H]([C@H]2O)O)O)CO)O)O)O)O	20	20	0.946078	0.970387	0.0132553	0.763179	1.39968	0.0276438
	ONLI_0051	malic acid	gctof	BJEPYKJPYRNKOW-UHFFFAOYSA-N	525	C(C(C(=O)O)O)C(=O)O	20	20	0.956435	0.966892	0.157027	0.435545	1.28814	0.244478
	ONLI_0052	lyxose	gctof	AEMOLEFTQBMNLQ-DTEWXJGMSA-N	441476	[C@@H]1([C@H]([C@H](O[C@H]([C@@H]1O)O)C(=O)O)O)O	20	20	0.950224	0.925848	0.150144	-0.451012	0.657966	0.237753
	ONLI_0053	lyxitol	gctof	HEBKCHPVOIAQTA-IMJSIDKUSA-N	439255	C([C@@H](C([C@H](CO)O)O)O)O	20	20	0.888631	0.946011	0.573245	-0.179249	0.973418	0.678621
	ONLI_0054	lysine	gctof	KDXKERNSBIXSRK-YFKPBYRVSA-N	5962	C(CCN)C[C@@H](C(=O)O)N	20	20	0.850972	0.945972	0.00329953	-0.884613	0.68464	0.00788167
	ONLI_0057	lauric acid	gctof	POULHZVOKOAJMA-UHFFFAOYSA-N	3893	CCCCCCCCCCCC(=O)O	19	20	0.86306	0.632302	0.919028	0.0314544	1.01557	0.939578
	ONLI_0058	lactic acid	gctof	JVTAAEKCZFNVCJ-UWTATZPHSA-N	61503	C[C@H](C(=O)O)O	20	20	0.322905	0.714694	0.0463468	0.620634	1.24972	0.0834657
	ONLI_0059	lactamide	gctof	SXQFCVDSOLSHOQ-UHFFFAOYSA-N	94220	CC(C(=O)N)O	20	20	0.982213	0.974721	0.24937	0.358546	1.14816	0.364755
	ONLI_0060	isothreonic acid	gctof	JPIJQSOTBSSVTP-GBXIJSLDSA-N	151152	C([C@H]([C@@H](C(=O)O)O)O)O	20	19	0.999938	1	7.93e-05	1.11282	1.32211	0.00027521
	ONLI_0061	isoleucine	gctof	AGPKZVBTJJNPAG-WHFBIAKZSA-N	6306	CC[C@H](C)[C@@H](C(=O)O)N	20	20	0.888006	0.814939	0.0158715	-0.719966	0.850846	0.0324278
	ONLI_0062	isohexonic acid	gctof	RGHNJXZEOKUKBD-SQOUGZDYSA-N	10690	C([C@H]([C@H]([C@@H]([C@H](C(=O)O)O)O)O)O)O	20	20	0.88614	0.804277	0.0447169	0.623037	1.25289	0.0810746
	ONLI_0063	isocitric acid	gctof	ODBLHEXUDAPZAU-UHFFFAOYSA-N	1198	C(C(C(C(=O)O)O)C(=O)O)C(=O)O	20	20	0.998376	0.999793	0.714189	-0.117526	0.956025	0.784342
	ONLI_0064	inosine	gctof	UGQMRVRMYYASKQ-KQYNXXCUSA-N	135398641	C1=NC2=C(C(=O)N1)N=CN2[C@H]3[C@@H]([C@@H]([C@H](O3)CO)O)O	20	20	0.336168	0.686397	0.0072144	0.809066	1.29758	0.0158245
	ONLI_0065	indoxyl sulfate	gctof	BXFFHSIDQOFMLE-UHFFFAOYSA-N	10258	C1=CC=C2C(=C1)C(=CN2)OS(=O)(=O)O	20	20	0.975668	0.930348	0.0141126	-0.731623	0.594223	0.0292048
	ONLI_0066	indole-3-propionic acid	gctof	GOLXRNDWAUTYKT-UHFFFAOYSA-N	3744	C1=CC=C2C(=C1)C(=CN2)CCC(=O)O	20	20	0.989321	0.796998	0.108067	-0.507019	0.772134	0.179368
	ONLI_0067	indole-3-lactate	gctof	XGILAAMKEQUXLS-UHFFFAOYSA-N	92904	C1=CC=C2C(=C1)C(=CN2)CC(C(=O)O)O	19	19	0.432786	0.996389	1.67e-05	-1.17917	0.664255	6.67e-05
	ONLI_0068	indole-3-acetate	gctof	SEOVTRFCIGRIMH-UHFFFAOYSA-N	802	C1=CC=C2C(=C1)C(=CN2)CC(=O)O	20	20	0.999965	0.998433	6.37e-06	-1.26754	0.59477	2.8e-05
	ONLI_0069	hydroxylamine	gctof	AVXURJPOCDRRFD-UHFFFAOYSA-N	787	NO	20	20	0.983815	0.94721	0.422945	-0.256058	0.937634	0.543882
	ONLI_0070	hydroxycarbamate NIST	gctof	DRAJWRKLRBNJRQ-UHFFFAOYSA-N	16639161	C(=O)(NO)O	20	20	0.990789	0.9928	0.527034	-0.196728	0.938883	0.637934
	ONLI_0071	hydrocinnamic acid	gctof	XMIIGOLPHOKFCH-UHFFFAOYSA-N	107	C1=CC=C(C=C1)CCC(=O)O	20	20	0.9873	0.779715	0.104944	0.509962	1.28455	0.17527
	ONLI_0072	hippuric acid	gctof	QIAFMBKCNZACKA-UHFFFAOYSA-N	464	C1=CC=C(C=C1)C(=O)NCC(=O)O	20	20	0.522314	0.810285	0.476067	0.226187	1.17541	0.5905
	ONLI_0073	hexuronic acid	gctof	IAJILQKETJEXLJ-RSJOWCBRSA-N	84740	C(=O)[C@@H]([C@H]([C@H]([C@@H](C(=O)O)O)O)O)O	19	20	0.21587	0.401939	0.373026	0.25852	1.19749	0.49634
	ONLI_0074	hexose	gctof	WQZGKKKJIJFFOK-PHYPRBDBSA-N	439357	C([C@@H]1[C@@H]([C@@H]([C@H]([C@H](O1)O)O)O)O)O	20	20	0.952025	0.993635	0.140724	0.45766	1.12614	0.225663
	ONLI_0075	hexitol	gctof	FBPFZTCFMRRESA-GUCUJZIJSA-N	11850	C([C@H]([C@@H]([C@@H]([C@H](CO)O)O)O)O)O	20	20	0.994961	0.999993	0.250798	-0.363002	0.870477	0.365747
	ONLI_0076	hexadecane	gctof	DCAYPVUWAIABOU-UHFFFAOYSA-N	11006	CCCCCCCCCCCCCCCC	20	20	0.820759	0.988641	0.656783	-0.141503	0.914437	0.744663
	ONLI_0078	glycolic acid	gctof	AEMRFAOFKBGASW-UHFFFAOYSA-N	757	C(C(=O)O)O	20	20	0.993897	0.777302	0.554011	-0.189572	0.962412	0.663415
	ONLI_0079	glycine	gctof	DHMQDGOQFOQNFH-UHFFFAOYSA-N	750	C(C(=O)O)N	20	20	0.965454	0.960232	0.0425103	0.62034	1.1056	0.0774226
	ONLI_0080	glycerol-alpha-phosphate	gctof	AWUCVROLDVIAJX-GSVOUGTGSA-N	439162	C([C@H](COP(=O)(O)O)O)O	20	20	0.997185	0.999808	0.126783	0.478965	1.15805	0.2066
	ONLI_0081	glycerol-3-galactoside	gctof	NHJUPBDCSOGIKX-VGPGGAHRSA-N	656504	C([C@@H]1[C@@H]([C@@H]([C@H]([C@@H](O1)OCC(CO)O)O)O)O)O	20	20	0.880405	0.934027	0.514239	0.207509	1.01439	0.626267
	ONLI_0082	glycerol	gctof	PEDCQBHIVMGVHV-UHFFFAOYSA-N	753	C(C(CO)O)O	20	20	0.792818	0.891067	0.297394	-0.329034	0.921173	0.417805
	ONLI_0083	glyceric acid	gctof	RBNPOMFGQQGHHO-UWTATZPHSA-N	439194	C([C@H](C(=O)O)O)O	20	20	0.998127	0.930014	0.741048	-0.105822	0.982181	0.808325
	ONLI_0086	glucose-1-phosphate	gctof	HXXFSFRBOHSIMQ-GASJEMHNSA-N	439165	C([C@@H]1[C@H]([C@@H]([C@H](C(O1)OP(=O)(O)O)O)O)O)O	20	20	0.366424	0.752763	0.21344	0.393916	1.09095	0.319961
	ONLI_0087	glucose	gctof	WQZGKKKJIJFFOK-VFUOTHLCSA-N	64689	C([C@@H]1[C@H]([C@@H]([C@H]([C@@H](O1)O)O)O)O)O	20	20	0.942402	0.978613	0.11506	0.482594	1.17045	0.189027
	ONLI_0088	fumaric acid	gctof	VZCYOOQTPOCHFL-OWOJBTEDSA-N	444972	C(=C/C(=O)O)\C(=O)O	20	20	0.996823	0.995467	0.630203	0.153018	1.07908	0.721641
	ONLI_0089	fucose	gctof	SHZGCJCMOBCMKK-FPRJBGLDSA-N	439650	C[C@@H]1[C@@H]([C@@H]([C@H]([C@@H](O1)O)O)O)O	20	20	0.778797	0.880964	0.709926	0.113671	1.02434	0.782863
	ONLI_0090	fructose	gctof	RFSUNEUAIZKAJO-ARQDHWQXSA-N	439709	C([C@@H]1[C@H]([C@@H]([C@](O1)(CO)O)O)O)O	20	20	0.0638333	0.508742	0.177395	-0.40541	0.773125	0.271489
	ONLI_0091	ethanolamine	gctof	HZAXFHJVJLSVMW-UHFFFAOYSA-N	700	C(CO)N	20	20	0.835101	0.763086	0.592502	-0.166983	0.967416	0.695282
	ONLI_0092	erythritol	gctof	UNXHWFMMPAWVPI-QWWZWVQMSA-N	169019	C([C@H]([C@@H](CO)O)O)O	20	20	0.999791	0.995039	8.53e-06	1.25574	1.51602	3.61e-05
	ONLI_0093	dodecanol	gctof	LQZZUXJYWNFBMV-UHFFFAOYSA-N	8193	CCCCCCCCCCCCO	20	20	0.999885	0.99613	0.245137	-0.369498	0.908487	0.360101
	ONLI_0094	D-erythro-sphingosine	gctof	WWUZIQQURGPMPG-KRWOKUGFSA-N	5280335	CCCCCCCCCCCCC/C=C/[C@H]([C@H](CO)N)O	20	20	0.939421	0.99811	0.876628	-0.0490334	0.941916	0.9141
	ONLI_0095	cystine	gctof	LEVWYRKDKASIDU-IMJSIDKUSA-N	67678	C([C@@H](C(=O)O)N)SSC[C@@H](C(=O)O)N	19	20	0.391987	0.735061	0.819902	-0.0671336	1.06474	0.873044
	ONLI_0096	cysteine	gctof	XUJNEKJLAYXESH-REOHCLBHSA-N	5862	C([C@@H](C(=O)O)N)S	20	20	0.94666	0.955833	0.798554	0.0819175	1.12457	0.8537
	ONLI_0098	conduritol-beta-epoxide	gctof	ZHMWOVGZCINIHW-SPHYCDKFSA-N	9989541	[C@@H]1([C@@H]([C@H](C2C([C@@H]1O)O2)O)O)O	20	20	0.663005	0.870996	0.659058	-0.141117	0.927701	0.745714
	ONLI_0100	citric acid	gctof	KRKNYBCHXYNGOX-UHFFFAOYSA-N	311	C(C(=O)O)C(CC(=O)O)(C(=O)O)O	20	20	0.995409	0.999726	0.692389	-0.126752	0.962144	0.767609
	ONLI_0101	catechol	gctof	YCIMNLLNPGFGHC-UHFFFAOYSA-N	289	C1=CC=C(C(=C1)O)O	20	20	0.999976	0.994683	0.415594	-0.260302	0.890037	0.537866
	ONLI_0102	caprylic acid	gctof	WWZKQHOCKIZLMA-UHFFFAOYSA-N	379	CCCCCCCC(=O)O	20	20	0.997945	0.972495	0.607414	-0.15913	0.978612	0.702541
	ONLI_0103	capric acid	gctof	GHVNFZFCNZKVNT-UHFFFAOYSA-N	2969	CCCCCCCCCC(=O)O	20	20	0.450827	0.663907	0.412978	0.260786	1.10779	0.536206
	ONLI_0104	beta-alanine	gctof	UCMIRNVEIXFBKS-UHFFFAOYSA-N	239	C(CN)C(=O)O	20	19	0.550268	0.506868	0.461977	0.214223	1.07624	0.575436
	ONLI_0105	benzoic acid	gctof	WPYMKLBDIGXBTP-UHFFFAOYSA-N	243	C1=CC=C(C=C1)C(=O)O	20	19	0.999961	0.667531	0.104792	-0.489546	0.690192	0.17527
	ONLI_0109	aminomalonate	gctof	JINBYESILADKFW-UHFFFAOYSA-N	100714	C(C(=O)O)(C(=O)O)N	20	20	0.312206	0.970906	0.72273	-0.108677	2.74718	0.79264
	ONLI_0110	alpha-ketoglutarate	gctof	KPGXRSRHYNQIFN-UHFFFAOYSA-N	51	C(CC(=O)O)C(=O)C(=O)O	20	20	0.994028	0.913784	0.0870162	0.525021	1.2839	0.148722
	ONLI_0111	alpha-aminoadipic acid	gctof	OYIFNHCXNCRBQI-UHFFFAOYSA-N	469	C(CC(C(=O)O)N)CC(=O)O	19	20	0.286883	0.72276	0.322555	0.30118	1.15411	0.443101
	ONLI_0113	alanine	gctof	QNAYBMKLOCPYGJ-REOHCLBHSA-N	5950	C[C@@H](C(=O)O)N	20	20	0.957357	0.857842	0.430551	0.2492	1.05337	0.5496
	ONLI_0114	adenosine	gctof	OIRDTQYFTABQOQ-KQYNXXCUSA-N	60961	C1=NC(=C2C(=N1)N(C=N2)[C@H]3[C@@H]([C@@H]([C@H](O3)CO)O)O)N	20	20	0.986021	0.811514	0.105525	0.489552	3.68877	0.175874
	ONLI_0115	6-deoxyglucitol	gctof	SKCKOFZKJLZSFA-JGWLITMVSA-N	151266	C[C@H]([C@H]([C@@H]([C@H](CO)O)O)O)O	20	20	0.530353	0.513234	0.988241	-0.00469562	1.00161	0.990703
	ONLI_0116	5-methoxytryptamine	gctof	JTEJPPKMYBDEMY-UHFFFAOYSA-N	1833	COC1=CC2=C(C=C1)NC=C2CCN	20	20	0.961448	0.86075	0.179525	-0.405916	0.481303	0.274226
	ONLI_0117	4-hydroxybutyric acid	gctof	SJZRECIVHVDYJC-UHFFFAOYSA-N	10413	C(CC(=O)O)CO	20	20	0.970732	0.961647	0.572461	-0.180306	0.940142	0.678621
	ONLI_0118	3-hydroxypropionic acid	gctof	ALRHLSYJTWAHJZ-UHFFFAOYSA-N	68152	C(CO)C(=O)O	20	20	0.999243	0.969364	0.912995	0.0350916	1.03116	0.936256
	ONLI_0119	3-hydroxybutyric acid	gctof	WHBMMWSBFZVSSR-GSVOUGTGSA-N	92135	C[C@H](CC(=O)O)O	20	20	0.86495	0.617848	0.0127283	-0.767296	0.630745	0.0267527
	ONLI_0120	3-aminoisobutyric acid	gctof	QCHPKSFMDHPSNR-UHFFFAOYSA-N	64956	CC(CN)C(=O)O	19	20	0.63381	0.926691	0.340664	0.290113	1.13073	0.462453
	ONLI_0121	3,6-anhydro-D-galactose	gctof	WZYRMLAWNVOIEX-BGPJRJDNSA-N	16069996	C1[C@H]([C@@H]([C@H](O1)[C@H](C=O)O)O)O	20	20	0.925852	0.779569	0.411329	-0.25478	0.976769	0.534927
	ONLI_0122	3-3-hydroxyphenylpropionic acid	gctof	QVWAEZJXDYOKEH-UHFFFAOYSA-N	91	C1=CC(=CC(=C1)O)CCC(=O)O	19	20	0.788082	0.993776	0.0290868	-0.650508	0.532224	0.0556172
	ONLI_0123	2-ketoisocaproic acid	gctof	BKAJNAXTPSGJCU-UHFFFAOYSA-N	70	CC(C)CC(=O)C(=O)O	20	20	0.894548	0.541612	0.440066	-0.246816	0.923785	0.554387
	ONLI_0124	2-hydroxyglutaric acid	gctof	HWXBTNAVRSUOJR-VKHMYHEASA-N	439939	C(CC(=O)O)[C@@H](C(=O)O)O	20	20	0.752047	0.782369	0.336186	0.287471	1.06531	0.457918
	ONLI_0125	2-hydroxybutanoic acid	gctof	AFENDNXGAFYKQO-UHFFFAOYSA-N	11266	CCC(C(=O)O)O	20	20	0.596823	0.311851	0.439587	-0.245776	0.119795	0.554387
	ONLI_0126	2-deoxytetronic acid	gctof	DZAIOXUZHHTJKN-UHFFFAOYSA-N	150929	C(C(CO)O)C(=O)O	20	20	0.999761	0.983304	0.321929	0.29777	1.0257	0.442997
	ONLI_0127	2-aminobutyric acid	gctof	QWCKQJZIFLGMSD-VKHMYHEASA-N	80283	CC[C@@H](C(=O)O)N	20	20	0.985784	0.995777	0.00423596	-0.863299	0.724309	0.00979871
	ONLI_0128	1,3,5-trimethylcyanuric acid	gctof	AHWDQDMGFXRVFB-UHFFFAOYSA-N	13225	CN1C(=O)N(C(=O)N(C1=O)C)C	20	20	0.934452	0.977567	0.317504	0.318797	1.0374	0.439159
	ONLI_0155	SM d38:1	CSHPOS	AADLTHQNYQJHQV-SVLGDMRNSA-N	44260124	CCCCCCCCCCCCCCCCCCCC(=O)N[C@@H](COP(=O)([O-])OCC[N+](C)(C)C)[C@@H](/C=C/CCCCCCCCCCCCC)O	20	20	0.995115	0.990552	0.000128167	1.09263	1.27576	0.000407804
	ONLI_0156	TAG 56:10; TAG 18:2-18:3-20:5;	CSHPOS	CEGFLXYMGPCHEY-MOSCTQMVSA-N	131763301	CCCCC/C=C\C/C=C\CCCCCCCC(=O)OC[C@@H](COC(=O)CCC/C=C\C/C=C\C/C=C\C/C=C\C/C=C\CC)OC(=O)CCCC/C=C\C/C=C\C/C=C\CCCCC	20	20	0.751215	0.909271	0.134229	0.463279	1.17675	0.216976
	ONLI_0157	TAG 58:7; TAG 18:1-18:1-22:5;	CSHPOS	AANCKINPVVQDGX-OSUITXOZSA-N	131760076	CCCCCC/C=C\CCCCCCCCCC(=O)OC[C@@H](COC(=O)CCCCC/C=C\C/C=C\C/C=C\C/C=C\C/C=C\CC)OC(=O)CCCCCCCCC/C=C\CCCCCC	20	20	0.999835	0.991319	6.46e-05	1.11758	2.06528	0.000229062
	ONLI_0158	AC 14:1	CSHPOS	ABVVZYXTZLEOHP-OLHLWXQYSA-N	90659872	CCCC/C=C\CCCCCCCC(=O)O[C@H](CC(=O)[O-])C[N+](C)(C)C	20	20	0.976905	0.656311	0.221077	-0.388196	0.751511	0.328445
	ONLI_0159	TAG 54:7; TAG 18:2-18:2-18:3;	CSHPOS	NGPHUAVENUDDAO-GZNXBNPNSA-N	100977823	CCCCC/C=C\C/C=C\CCCCCCCC(=O)OC[C@@H](COC(=O)CCCCCCC/C=C\C/C=C\C/C=C\CC)OC(=O)CCCCCCC/C=C\C/C=C\CCCCC	19	20	0.653017	0.910208	0.0397113	0.579524	1.71095	0.0731524
	ONLI_0160	PC(22:6(4Z,7Z,10Z,13Z,16Z,19Z)/18:0)	CSHPOS	AHWXJDWBIIDPKS-TZUVPVEASA-N	52923691	CCCCCCCCCCCCCCCCCC(=O)O[C@H](COC(=O)CC/C=C\C/C=C\C/C=C\C/C=C\C/C=C\C/C=C\CC)COP(=O)([O-])OCC[N+](C)(C)C	20	20	0.999552	0.99965	1.35e-05	1.21493	1.51153	5.43e-05
	ONLI_0161	DAG 36:2; DAG 18:0-18:2;	CSHPOS	AJMZUFBKADIAKC-SKTOPKGQSA-N	6441562	CCCCCCCCCCCCCCCCCC(=O)OC[C@H](CO)OC(=O)CCCCCCC/C=C\C/C=C\CCCCC	20	20	0.996754	0.679516	0.00072203	0.995053	1.52028	0.00196363
	ONLI_0162	TAG 55:2; TAG 17:0-18:1-20:1;	CSHPOS	AKDAPWJIGQLALK-XSUIJCOHSA-N	134718461	CCCCCCCCCCCCCCCCC(=O)OC[C@H](COC(=O)CCCCCCCCC/C=C/CCCCCCCC)OC(=O)CCCCCCCCC/C=C/CCCCCC	20	20	0.999999	0.996899	3.09e-05	1.15849	2.65943	0.000118035
	ONLI_0163	9-HODE cholesteryl ester	CSHPOS	ALWABJCAEDQEGO-SGAXLBQASA-N	71684431	CCCCC/C=C\C=C\C(CCCCCCCC(=O)O[C@H]1CC[C@@]2([C@H]3CC[C@]4([C@H]([C@@H]3CC=C2C1)CC[C@@H]4[C@H](C)CCCC(C)C)C)C)O	20	20	0.770292	0.00975458	0.265089	0.333486	1.30497	0.383118
	ONLI_0164	PE38:4	CSHPOS	ANRKEHNWXKCXDB-BHFWLYLHSA-N	46891781	CCCCCCCCCCCCCCCCCC(=O)OC[C@H](COP(=O)([O-])OCC[NH3+])OC(=O)CCC/C=C\C/C=C\C/C=C\C/C=C\CCCCC	20	20	0.410589	0.741763	1.51e-09	1.51718	1.68475	2.3e-08
	ONLI_0165	SM d42:4; SM d14:2/28:2;	CSHPOS	APVVIKGWDUMMAY-VIVRHXLSSA-N	138120868	CCCCCCCCCCC/C=C\C/C=C\CCCCCCCCCCCC(=O)NC(COP(=O)([O-])OCC[N+](C)(C)C)C(/C=C/CC/C=C/CCCCC)O	20	20	0.961879	0.998904	0.00217729	-0.924267	0.855606	0.00539298
	ONLI_0167	PC 38:4; PC 18:0-20:4;	CSHPOS	HAKKEJDMTIQLJH-UGKDIXSWSA-N	53478701	CCCCCCCCCCCCCCCCCC(=O)OC[C@H](COP(=O)([O-])OCC[N+](C)(C)C)OC(=O)CCCCCC/C=C\C/C=C\C/C=C\C/C=C\CC	20	20	0.647624	0.693519	0.0050578	-0.851042	0.827193	0.0115015
	ONLI_0168	PC36:1	CSHPOS	ATHVAWFAEPLPPQ-VRDBWYNSSA-N	24778825	CCCCCCCCCCCCCCCCCC(=O)OC[C@H](COP(=O)([O-])OCC[N+](C)(C)C)OC(=O)CCCCCCC/C=C\CCCCCCCC	20	20	0.997513	0.937837	6.47e-07	1.32789	1.62984	3.59e-06
	ONLI_0169	TAG 53:5; TAG 17:1-18:2-18:2;	CSHPOS	0	NA	0	20	20	0.992176	0.943386	2.26e-05	1.17064	1.96453	8.75e-05
	ONLI_0170	PC35:3	CSHPOS	AYXGHIQPMDYMJC-AHMBLZLYSA-N	52924614	CCCCCCCCCCCCCCCCCC(=O)O[C@H](COC(=O)CCCCCC/C=C\C/C=C\C/C=C\CCCCC)COP(=O)(O)OCCN	20	20	0.260802	0.260802	5.26e-10	1.54528	2.11297	1.21e-08
	ONLI_0171	TAG 49:0; TAG 15:0-16:0-18:0;	CSHPOS	AYHAGPSMXXZJSI-VCZQVZGSSA-N	131754177	CCCCCCCCCCCCCCCCCCOC[C@H](COC(=O)CCCCCCCCCCCCCC)OC(=O)CCCCCCCCCCCCCCC	19	20	0.604343	0.877129	0.0232103	0.671234	1.62067	0.0454443
	ONLI_0172	LPE 18:0	CSHPOS	BBYWOYAFBUOUFP-JOCHJYFZSA-N	9547068	CCCCCCCCCCCCCCCCCC(=O)OC[C@H](COP(=O)(O)OCCN)O	19	19	0.980608	0.943022	0.00961913	-0.723899	0.898742	0.0204311
	ONLI_0173	TAG 53:1; TAG 17:0-18:0-18:1;	CSHPOS	BHJLNGDWUXQOBH-QOCHGBHMSA-N	138126516	CCCCCCCCCCCCCCCCCC(=O)OC(COC(=O)CCCCCCCCCCCCCCCC)COC(=O)CCCCCCCCC/C=C\CCCCCC	20	20	0.968004	0.362499	0.00107465	0.940671	2.17466	0.0028179
	ONLI_0175	TAG 60:13; TAG 18:2-20:5-22:6;	CSHPOS	GKGVYCDLFAHWTQ-MYJMWWOYSA-N	131763450	CCCCC/C=C\C/C=C\CCCCCCCC(=O)OC[C@@H](COC(=O)CC/C=C\C/C=C\C/C=C\C/C=C\C/C=C\C/C=C\CC)OC(=O)CCC/C=C\C/C=C\C/C=C\C/C=C\C/C=C\CC	20	20	0.980437	0.984052	0.0768495	-0.554605	0.773551	0.13304
	ONLI_0176	TAG 47:0; TAG 15:0-16:0-16:0;	CSHPOS	BLIGKERFCBUUQF-MFERNQICSA-N	131754153	CCCCCCCCCCCCCCCC(=O)OC[C@H](COC(=O)CCCCCCCCCCCCCC)OC(=O)CCCCCCCCCCCCCCC	20	20	0.687745	0.616275	0.0305051	0.6514	1.2849	0.0579166
	ONLI_0177	DAG 36:3; DAG 18:1-18:2;	CSHPOS	BLZVZPYMHLXLHG-JOBMVARSSA-N	9543722	CCCCCCCC/C=C\CCCCCCCC(=O)OC[C@H](CO)OC(=O)CCCCCCC/C=C\C/C=C\CCCCC	20	20	0.809293	0.613163	8.1e-05	1.1237	1.53563	0.000278816
	ONLI_0178	PC38:7	CSHPOS	BNNUJTATKJXKJP-XCDHYEIISA-N	53479075	CCCCC/C=C\C/C=C\C/C=C\CCCCC(=O)O[C@H](COC(=O)CCCCCC/C=C\C/C=C\C/C=C\C/C=C\CC)COP(=O)([O-])OCC[N+](C)(C)C	20	20	0.998111	0.554806	5.63e-06	1.24217	2.49766	2.52e-05
	ONLI_0179	PC40:7 A	CSHPOS	BPUROMFCPFGBOT-ZEGPSQTJSA-N	24778982	CCCCC/C=C\C/C=C\CCCCCCCC(=O)OC[C@H](COP(=O)([O-])OCC[N+](C)(C)C)OC(=O)CC/C=C\C/C=C\C/C=C\C/C=C\C/C=C\CCCCC	20	20	0.963226	0.635251	4.5e-05	1.15087	1.56538	0.000165306
	ONLI_0180	PC 39:7; PC 17:1-22:6;	CSHPOS	BWMGYQAIDPQZGJ-VKOPMEPESA-N	52922579	CCCCCCC/C=C\CCCCCCCC(=O)OC[C@H](COP(=O)([O-])OCC[N+](C)(C)C)OC(=O)CC/C=C\C/C=C\C/C=C\C/C=C\C/C=C\C/C=C\CC	20	19	0.999993	0.893954	4.72e-07	1.34571	1.67108	2.74e-06
	ONLI_0181	PC36:3 A	CSHPOS	BXRLDROZWDUSGM-ZRYFCQOPSA-N	24778937	CCCCCCCC/C=C\CCCCCCCC(=O)OC[C@H](COP(=O)([O-])OCC[N+](C)(C)C)OC(=O)CCCC/C=C\C/C=C\CCCCCCCC	20	20	0.980367	0.531518	2.11e-08	1.44093	1.70304	1.65e-07
	ONLI_0182	TAG 56:0; TAG 16:0-18:0-22:0;	CSHPOS	CAPRXGZRZWSDGE-UWGNJQTFSA-N	131755012	CCCCCCCCCCCCCCCCCCCCCC(=O)OC[C@H](COC(=O)CCCCCCCCCCCCCCC)OC(=O)CCCCCCCCCCCCCCCCC	20	20	0.877772	0.991	0.446859	0.240341	1.14511	0.562031
	ONLI_0183	TAG 52:7; TAG 16:1-18:2-18:4;	CSHPOS	CMQKNURFVKDTED-HQIPLBRRSA-N	131759572	CCCCCC/C=C\CCCCCCCC(=O)OC[C@@H](COC(=O)CCCC/C=C\C/C=C\C/C=C\C/C=C\CC)OC(=O)CCCCCCC/C=C\C/C=C\CCCCC	20	20	0.999551	0.835766	1.95e-06	1.25845	2.14924	9.59e-06
	ONLI_0184	TAG 58:10; TAG 16:1-20:4-22:5;	CSHPOS	FARJXFHQIBPRRK-MCQDRIRZSA-N	131759657	CCCCCC/C=C\CCCCCCCC(=O)OC[C@@H](COC(=O)CC/C=C\C/C=C\C/C=C\C/C=C\C/C=C\CCCCC)OC(=O)CCC/C=C\C/C=C\C/C=C\C/C=C\CCCCC	20	20	0.731737	0.727824	0.354355	-0.286881	0.922406	0.474635
	ONLI_0185	PCo-44:5	CSHPOS	CEZAZXUWDFPTTE-FHIJIHMSSA-N	53481767	CCCCC/C=C\C/C=C\CCCCCCCCCCCCOC[C@H](COP(=O)([O-])OCC[N+](C)(C)C)OC(=O)CCCCCCCC/C=C\C/C=C\C/C=C\CCCCC	20	20	0.646694	0.721084	0.238278	0.349648	1.09284	0.350665
	ONLI_0186	PEo-36:3	CSHPOS	CFANDHZPOSNKNO-UDHSZFGOSA-N	53480897	CCCCCCCC/C=C\CCCCCCCC(=O)O[C@H](CO/C=C\CCCCCC/C=C\CCCCCCCC)COP(=O)(O)OCCN	20	19	0.997641	0.944328	1.01e-06	1.33682	1.41724	5.32e-06
	ONLI_0187	TAG 60:2; TAG 18:1-20:1-22:0;	CSHPOS	CFOWRVBCJCEHTO-NYLLBKPFSA-N	131757450	CCCCCCCCCCCCCCCCCCCCCC(=O)OC[C@@H](COC(=O)CCCCCCCCC/C=C\CCCCCC)OC(=O)CCCCCCCCC/C=C\CCCCCCCC	20	20	0.48674	0.446599	0.0118045	0.750633	1.86705	0.0249412
	ONLI_0188	Zymosterol	CSHPOS	CGSJXLIKVBJVRY-XTGBIJOFSA-N	92746	C[C@H](CCC=C(C)C)[C@H]1CC[C@@H]2[C@@]1(CCC3=C2CC[C@@H]4[C@@]3(CC[C@@H](C4)O)C)C	20	20	0.848911	0.771838	0.540541	-0.19573	0.995327	0.650256
	ONLI_0189	TAG 54:3; TAG 16:0-18:0-20:3;	CSHPOS	CICXNKCKBFXJSH-LZWIKYMTSA-N	131755017	CCCCCCCCCCCCCCCCCC(=O)O[C@@H](COC(=O)CCCCCCCCCCCCCCC)COC(=O)CCC/C=C\C/C=C\C/C=C\CCCCCCCC	20	20	0.935764	0.83791	0.00801018	0.756619	1.25621	0.0174276
	ONLI_0190	TAG 56:4; TAG 18:0-18:0-20:4;	CSHPOS	CIRJQIDEADRSMG-ZYKWSEAGSA-N	131750364	CCCCCCCCCCCCCCCCCC(=O)OC[C@@H](COC(=O)CCC/C=C\C/C=C\C/C=C\C/C=C\CCCCC)OC(=O)CCCCCCCCCCCCCCCCC	20	20	0.997954	0.36027	1.74e-07	1.36637	2.21939	1.1e-06
	ONLI_0191	TAG 54:1; TAG 18:0-18:0-18:1;	CSHPOS	CXVKBFLPGNGMQW-NAWMRHBJSA-N	131750547	CCCCCCCCCCCCCCCCCC(=O)OC[C@@H](COC(=O)CCCCCCCCC/C=C\CCCCCC)OC(=O)CCCCCCCCCCCCCCCCC	20	20	0.998505	0.999986	2.62e-07	1.3496	4.03387	1.56e-06
	ONLI_0192	TAG 51:3; TAG 15:0-18:1-18:2;	CSHPOS	CYSYJKJDVJLYTD-KDHVXLOFSA-N	138140505	CCCCCCCCCCCCCCC(=O)OCC(COC(=O)CCCCCCCC/C=C\C=C/CCCCC)OC(=O)CCCCCCCCC/C=C\CCCCCC	20	20	0.965123	0.994155	4.42e-05	1.1375	2.22562	0.000163084
	ONLI_0193	SMd42:2	CSHPOS	DACOGJMBYLZYDH-GXJPFUDISA-N	52931217	CCCCCCCCCCCCCCCCCCCCCCCC(=O)N[C@@H](COP(=O)([O-])OCC[N+](C)(C)C)[C@@H](/C=C/CCCCCCCC/C=C\CCC)O	20	20	0.999365	0.951153	0.68407	-0.130542	0.987282	0.764829
	ONLI_0194	LPE18:2	CSHPOS	DBHKHNGBVGWQJE-USWSLJGRSA-N	52925130	CCCCC/C=C\C/C=C\CCCCCCCC(=O)OC[C@H](COP(=O)(O)OCCN)O	20	20	0.977815	0.982715	0.421483	0.256373	1.10026	0.543741
	ONLI_0195	TAG 54:0; TAG 16:0-18:0-20:0;	CSHPOS	FPBBGJFVHOTVDS-GNFJTHHVSA-N	131755693	CCCCCCCCCCCCCCCCCCCC(=O)OC[C@H](COC(=O)CCCCCCCCCCCCCCC)OCCCCCCCCCCCCCCCCCC	19	20	0.597881	0.991842	0.50984	-0.181888	0.954585	0.622794
	ONLI_0196	PCo-36:3	CSHPOS	DIHWZUCEXWUHOD-IIVNATNGSA-N	53480801	CCCCCCCC/C=C\CCCCCCCC(=O)O[C@H](CO/C=C\CCCCCC/C=C\CCCCCCCC)COP(=O)([O-])OCC[N+](C)(C)C	20	20	0.708054	0.988324	7.47e-08	1.4019	1.46302	5.1e-07
	ONLI_0197	TAG 48:3; TAG 12:0-18:1-18:2;	CSHPOS	DILVDBIGCVMQJQ-HQZFYGAOSA-N	138143748	CCCCCCCCCCCC(=O)OCC(COC(=O)CCCCCCCC/C=C\C=C/CCCCC)OC(=O)CCCCCCCCC/C=C\CCCCCC	20	20	0.999975	0.884568	1.81e-05	1.19933	3.12082	7.16e-05
	ONLI_0198	TAG 56:7; TAG 16:0-18:1-22:6;	CSHPOS	DNTWVXNMAFTXDU-RVFBAGKZSA-N	131755186	CCCCCCCCCCCCCCCC(=O)OC[C@@H](COC(=O)CC/C=C\C/C=C\C/C=C\C/C=C\C/C=C\C/C=C\CC)OC(=O)CCCCCCCCC/C=C\CCCCCC	20	20	0.974093	0.908621	0.0231056	0.667602	1.38976	0.0453658
	ONLI_0199	TAG 48:3; TAG 14:0-16:0-18:3;	CSHPOS	ROOGPSPBLOJPPQ-MMNSDLEGSA-N	131753281	CCCCCCCCCCCCCCCC(=O)O[C@@H](COC(=O)CCCCCCCCCCCCC)COC(=O)CCCC/C=C\C/C=C\C/C=C\CCCCC	20	20	0.998654	0.531491	7.26e-06	1.21137	3.08028	3.13e-05
	ONLI_0200	TAG 50:3; TAG 16:0-16:1-18:2;	CSHPOS	HDFLQJUGWGNORO-NSVHLBAISA-N	131750350	CCCCCCCCCCCCCCCC(=O)OC[C@@H](COC(=O)CCCCCCC/C=C\C/C=C\CCCCC)OC(=O)CCCCCCC/C=C\CCCCCC	20	20	0.998715	0.583266	4.93e-06	1.24364	3.19341	2.24e-05
	ONLI_0201	TAG 50:0; TAG 16:0-16:0-18:0;	CSHPOS	DQKMNCLZNGAXNX-DPDRHGIRSA-N	99649112	CCCCCCCCCCCCCCCCCC(=O)OC[C@H](COC(=O)CCCCCCCCCCCCCCC)OC(=O)CCCCCCCCCCCCCCC	20	20	0.742392	0.759266	0.292431	-0.335292	0.878765	0.412271
	ONLI_0202	PE 16:0-20:4	CSHPOS	DRIVXEVMDWCWLI-CAQMIEAISA-N	9546800	CCCCCCCCCCCCCCCC(=O)OC[C@H](COP(=O)(O)OCCN)OC(=O)CCC/C=C\C/C=C\C/C=C\C/C=C\CCCCC	20	20	0.260802	0.260802	5.37e-10	1.54655	2.7014	1.21e-08
	ONLI_0203	PC42:6	CSHPOS	DSVRMAGYENFTLY-GDDYDVMSSA-N	52923651	CCCCC/C=C\C/C=C\CCCCCCCCCC(=O)O[C@H](COC(=O)CCCCC/C=C\C/C=C\C/C=C\C/C=C\CCCCC)COP(=O)([O-])OCC[N+](C)(C)C	20	20	0.260802	0.260802	3.77e-10	1.53431	10.2159	1.21e-08
	ONLI_0205	TAG 56:3; TAG 18:1-18:1-20:1;	CSHPOS	QXMHHXQBBKDSSL-QGDSHWIZSA-N	131750410	CCCCCCCC/C=C\CCCCCCCCCC(=O)OC[C@H](COC(=O)CCCCCCC/C=C\CCCCCCCC)OC(=O)CCCCCCC/C=C\CCCCCCCC	20	20	0.953473	0.992492	1.29e-08	1.439	4.39306	1.13e-07
	ONLI_0206	TAG 52:5; TAG 16:0-18:2-18:3;	CSHPOS	PWAOXOJAJJJACV-MSFNIHOKSA-N	131755325	CCCCCCCCCCCCCCCC(=O)OC[C@@H](COC(=O)CCCC/C=C\C/C=C\C/C=C\CCCCC)OC(=O)CCCCCCC/C=C\C/C=C\CCCCC	20	20	0.909715	0.971233	0.00376838	0.859775	1.84823	0.00884416
	ONLI_0207	PC(18:0/22:6(4Z,7Z,10Z,13Z,16Z,19Z)	CSHPOS	FAUYAENFVCNTAL-PFFNLMTBSA-N	24778876	CCCCCCCCCCCCCCCCCC(=O)OC[C@H](COP(=O)([O-])OCC[N+](C)(C)C)OC(=O)CC/C=C\C/C=C\C/C=C\C/C=C\C/C=C\C/C=C\CC	20	20	0.814477	0.917867	0.154892	-0.44817	0.870131	0.242731
	ONLI_0208	TAG 46:2; TAG 12:0-16:0-18:2;	CSHPOS	0	NA	0	20	20	0.991953	0.999406	4.89e-05	1.14287	2.59496	0.000179059
	ONLI_0209	TAG 51:1; TAG 16:0-17:0-18:1;	CSHPOS	RHDRMOUSDQDVCE-IWRJKWNLSA-N	9544019	CCCCCCCCCCCCCCCCC(=O)O[C@H](COC(=O)CCCCCCCCCCCCCCC)COC(=O)CCCCCCC/C=C\CCCCCCCC	20	20	0.996623	0.997856	0.00838851	0.792609	1.6787	0.018062
	ONLI_0210	TAG 52:5; TAG 16:0-16:1-20:4;	CSHPOS	BURBQZUNMNAKMA-RAKRAUFVSA-N	131750351	CCCCCCCCCCCCCCCC(=O)OC[C@@H](COC(=O)CCC/C=C\C/C=C\C/C=C\C/C=C\CCCCC)OC(=O)CCCCCCC/C=C\CCCCCC	20	20	0.998964	0.979123	0.00114733	0.944008	1.39829	0.00297935
	ONLI_0211	PC 38:5e; PC 18:1e/20:4; [M+H]+	CSHPOS	FHHVIBPVBBRLOR-IYACIECVSA-N	24779390	CCCCCCCCCCCCCCCC/C=C\OC[C@H](COP(=O)([O-])OCC[N+](C)(C)C)OC(=O)CCC/C=C\C/C=C\C/C=C\C/C=C\CCCCC	20	20	0.997861	0.998535	0.000633785	-1.00908	0.850251	0.00176539
	ONLI_0212	TAG 56:2; TAG 16:0-18:1-22:1;	CSHPOS	JBTULCCTZFQLPM-JSPVYFJMSA-N	131755171	CCCCCCCCCCCCCCCC(=O)OC[C@@H](COC(=O)CCCCCCCCCCC/C=C\CCCCCCCC)OC(=O)CCCCCCCCC/C=C\CCCCCC	19	20	0.450653	0.982209	1.62e-08	1.45748	4.49031	1.33e-07
	ONLI_0213	PC40:4	CSHPOS	FHUAYOMRHXZKHT-JUGJLYODSA-N	53479183	CCCCCCCC/C=C\CCCCCCCCCCCC(=O)OC[C@H](COP(=O)([O-])OCC[N+](C)(C)C)OC(=O)CCCCCCC/C=C\C/C=C\C/C=C\CC	20	20	0.943847	0.989756	0.0458814	0.624098	1.16606	0.082999
	ONLI_0214	PE 40:7e; PE 18:1e/22:6;	CSHPOS	FIJFPUAJUDAZEY-MNDXXDKYSA-N	42607458	CCCCCCCCCCCCCCCC/C=C\OC[C@H](COP(=O)(O)OCCN)OC(=O)CC/C=C\C/C=C\C/C=C\C/C=C\C/C=C\C/C=C\CC	20	20	0.997871	0.954821	0.253864	0.358197	1.0494	0.369549
	ONLI_0215	SMd40:1	CSHPOS	FJJANLYCZUNFSE-TWKUQIQBSA-N	44260125	CCCCCCCCCCCCCCCCCCCCCC(=O)N[C@@H](COP(=O)([O-])OCC[N+](C)(C)C)[C@@H](/C=C/CCCCCCCCCCCCC)O	20	20	0.260802	0.260802	5.26e-10	1.54535	2.5909	1.21e-08
	ONLI_0217	TAG 50:4; TAG 14:0-16:0-20:4;	CSHPOS	FKJNKIIHHYXTFQ-SUNRTHERSA-N	131753284	CCCCCCCCCCCCCCCC(=O)O[C@@H](COC(=O)CCCCCCCCCCCCC)COC(=O)CCC/C=C\C/C=C\C/C=C\C/C=C\CCCCC	20	20	0.999978	0.861221	5.02e-06	1.23464	2.24387	2.27e-05
	ONLI_0218	SMd40:2 A	CSHPOS	FOULCGVQZYQEQM-DNXGLLHMSA-O	52931202	CCCCCCCCCCC/C=C/[C@H]([C@H](COP(=O)(O)OCC[N+](C)(C)C)NC(=O)CCCCCCCCCCCCC/C=C\CCCCCCCC)O	20	20	0.260802	0.260802	3.68e-10	1.53375	3.1712	1.21e-08
	ONLI_0220	PC 36:4; PC 18:2-18:2;	CSHPOS	FVXDQWZBHIXIEJ-LNDKUQBDSA-N	5288075	CCCCC/C=C\C/C=C\CCCCCCCC(=O)OC[C@H](COP(=O)([O-])OCC[N+](C)(C)C)OC(=O)CCCCCCC/C=C\C/C=C\CCCCC	20	20	0.967507	0.503353	7.23e-06	1.23971	2.01152	3.13e-05
	ONLI_0221	DAG 34:2; DAG 16:1-18:1;	CSHPOS	FWWLDEIJAPIBES-DATDAJMQSA-N	9543694	CCCCCCCC/C=C\CCCCCCCC(=O)O[C@@H](CO)COC(=O)CCCCCCC/C=C\CCCCCC	20	20	0.999995	0.967359	1.57e-06	1.31447	1.59266	7.85e-06
	ONLI_0222	CE (18:3)	CSHPOS	FYMCIBHUFSIWCE-KNWYFNKZSA-N	131801659	CC/C=C\C/C=C\C/C=C\CCCCCCCC(=O)O[C@H]1CC[C@@]2(C3CC[C@]4(C(C3CC=C2C1)CCC4[C@H](C)CCCC(C)C)C)C	20	20	0.983689	0.950984	8.1e-05	1.12896	1.65487	0.000278816
	ONLI_0223	TAG 49:4; TAG 15:2-16:0-18:2;	CSHPOS	0	NA	0	20	20	1	9.13e-06	1.75e-07	1.25447	6.1315	1.1e-06
	ONLI_0224	PC16:0/9:0COOH	CSHPOS	GHQQYDSARXURNG-SSEXGKCCSA-N	46907870	CCCCCCCCCCCCCCCC(=O)OC[C@H](COP(=O)([O-])OCC[N+](C)(C)C)OC(=O)CCCCCCCC(=O)O	20	20	0.569687	0.704925	0.173595	0.4311	1.32902	0.266686
	ONLI_0225	PE 36:3; PE 18:1-18:2;	CSHPOS	GKAFCSRKMWFPSJ-RJXNKANHSA-N	9546753	CCCCCCCC/C=C\CCCCCCCC(=O)OC[C@H](COP(=O)(O)OCCN)OC(=O)CCCCCCC/C=C\C/C=C\CCCCC	20	20	0.497908	0.410042	9.01e-10	1.53147	2.71043	1.69e-08
	ONLI_0226	TAG 50:5; TAG 14:0-18:2-18:3;	CSHPOS	BVZCCLFFAYZNFZ-QLFKCXFRSA-N	131753671	CCCCCCCCCCCCCC(=O)OC[C@@H](COC(=O)CCCCCCC/C=C\C/C=C\C/C=C\CC)OC(=O)CCCCCCC/C=C\C/C=C\CCCCC	20	20	0.997048	0.999946	9.14e-06	1.23488	2.22249	3.83e-05
	ONLI_0227	LPC 20:4	CSHPOS	GOMVPVRDBLLHQC-VEJNOCSESA-N	53480469	CC/C=C\C/C=C\C/C=C\C/C=C\CCCCCCC(=O)OC[C@H](COP(=O)([O-])OCC[N+](C)(C)C)O	19	20	0.959373	0.972	9.38e-07	-1.33613	0.69679	5e-06
	ONLI_0228	PC32:2	CSHPOS	GPWHCUUIQMGELX-VHQDNGOZSA-N	24778764	CCCCCC/C=C\CCCCCCCC(=O)OC[C@H](COP(=O)([O-])OCC[N+](C)(C)C)OC(=O)CCCCCCC/C=C\CCCCCC	20	20	0.956488	0.92804	1.9e-08	1.45598	1.95194	1.5e-07
	ONLI_0229	PCo-38:4 A	CSHPOS	GWBOVQHRCURSPU-QMFAPAEZSA-N	53480815	CCCCCCCC/C=C\CCCCCC/C=C\OC[C@H](COP(=O)([O-])OCC[N+](C)(C)C)OC(=O)CCCCCCCCC/C=C\C/C=C\CCCCC	20	19	0.918833	0.31951	0.154676	0.432273	1.0565	0.242731
	ONLI_0230	LPC 22:4	CSHPOS	ZOJBSSVHFSBHMP-JJJSWPRASA-N	52924039	CCCCC/C=C\C/C=C\C/C=C\C/C=C\CCCCCC(=O)OC[C@H](COP(=O)([O-])OCC[N+](C)(C)C)O	20	20	0.65877	0.79491	0.159586	0.439723	1.13093	0.247527
	ONLI_0231	PE34:2	CSHPOS	HBZNVZIRJWODIB-NHCUFCNUSA-N	9546747	CCCCCCCCCCCCCCCC(=O)OC[C@H](COP(=O)(O)OCCN)OC(=O)CCCCCCC/C=C\C/C=C\CCCCC	20	20	0.681976	0.559054	1.42e-09	1.51477	2.90421	2.24e-08
	ONLI_0232	TAG 52:6; TAG 16:0-16:1-20:5;	CSHPOS	CCDSJNBGVOSHIH-OFLVPTCNSA-N	131755156	CCCCCCCCCCCCCCCC(=O)OC[C@@H](COC(=O)CCC/C=C\C/C=C\C/C=C\C/C=C\C/C=C\CC)OC(=O)CCCCCCC/C=C\CCCCCC	20	20	0.999922	0.951211	6.16e-06	1.20498	2.1487	2.72e-05
	ONLI_0233	TAG 58:10; TAG 18:2-18:2-22:6;	CSHPOS	YNVHIDISXOPRLL-VOUXIQFDSA-N	131750599	CCCCC/C=C\C/C=C\CCCCCCCC(=O)OC[C@@H](COC(=O)CC/C=C\C/C=C\C/C=C\C/C=C\C/C=C\C/C=C\CC)OC(=O)CCCCCCC/C=C\C/C=C\CCCCC	20	20	0.997812	0.901966	0.434948	-0.246461	0.92694	0.553944
	ONLI_0234	AC 18:1	CSHPOS	HITOYGLMAFIRNI-YSESTWPTSA-N	53477830	CCCCCC/C=C/CCCCCCCCCC(=O)O[C@@H](CCC(=O)[O-])[N+](C)(C)C	20	20	0.828258	0.752071	0.413979	-0.261196	0.822608	0.536639
	ONLI_0235	TAG 56:4; TAG 18:1-18:2-20:1;	CSHPOS	YONCDTJKIZDSKQ-UVIGLXQBSA-N	131750415	CCCCCCCC/C=C\CCCCCCCCCC(=O)OC[C@H](COC(=O)CCCCCCC/C=C\CCCCCCCC)OC(=O)CCCCCCC/C=C\C/C=C\CCCCC	20	20	0.999999	0.988716	1.14e-06	1.2841	3.00537	5.93e-06
	ONLI_0236	CE (16:1)	CSHPOS	HODJWNWCVNUPAQ-XDOSKZMUSA-N	13828666	CCCCCC/C=C\CCCCCCCC(=O)O[C@H]1CC[C@@]2([C@H]3CC[C@]4([C@H]([C@@H]3CC=C2C1)CC[C@@H]4[C@H](C)CCCC(C)C)C)C	20	20	0.999653	0.938362	0.000202818	1.07335	2.37168	0.00061379
	ONLI_0237	TAG 60:11; TAG 18:1-20:4-22:6;	CSHPOS	HSALVDSITWQZNS-FENZPOJDSA-N	131760287	CCCCCC/C=C\CCCCCCCCCC(=O)OC[C@@H](COC(=O)CC/C=C\C/C=C\C/C=C\C/C=C\C/C=C\C/C=C\CC)OC(=O)CCC/C=C\C/C=C\C/C=C\C/C=C\CCCCC	20	20	0.876081	0.929261	0.00907503	-0.787717	0.84735	0.0194293
	ONLI_0238	TAG 46:3; TAG 12:0-16:1-18:2;	CSHPOS	0	NA	0	20	20	0.993549	0.0785351	0.000169665	1.02637	2.40712	0.00052938
	ONLI_0239	TAG 58:1; TAG 18:0-18:1-22:0;	CSHPOS	HTEKPEUBHXJJTE-VIQUSSKHSA-N	131755932	CCCCCCCCCCCCCCCCCCCCCC(=O)OC[C@H](COC(=O)CCCCCCCCCCCCCCCCC)OC(=O)CCCCCCCCC/C=C\CCCCCC	20	20	0.820012	0.472	0.00257468	0.886055	2.22819	0.00632488
	ONLI_0240	LPC p-16:0	CSHPOS	HTZINLFNXLXRBC-CQLBIITFSA-N	10917802	CCCCCCCCCCCCCC/C=C\OC[C@H](COP(=O)([O-])OCC[N+](C)(C)C)O	20	20	0.987877	0.982883	0.520911	-0.194877	0.99109	0.632479
	ONLI_0241	TAG 48:2; TAG 14:0-16:0-18:2;	CSHPOS	YUIIXXZIUIOJQY-RGFFXGESSA-N	131753280	CCCCCCCCCCCCCCCC(=O)O[C@@H](COC(=O)CCCCCCCCCCCCC)COC(=O)CCCCCCC/C=C\C/C=C\CCCCC	20	20	0.996537	0.63865	3.13e-05	1.17802	3.65376	0.000118757
	ONLI_0243	Cholesterol	CSHPOS	HVYWMOMLDIMFJA-DPAQBDIFSA-N	5997	C[C@H](CCCC(C)C)[C@H]1CC[C@@H]2[C@@]1(CC[C@H]3[C@H]2CC=C4[C@@]3(CC[C@@H](C4)O)C)C	20	20	0.999964	0.999609	0.00103826	0.948764	1.0739	0.00274033
	ONLI_0244	TAG 54:2; TAG 18:0-18:1-18:1;	CSHPOS	RYNHWWNZNIGDAQ-WNMJAFDRSA-N	42627601	CCCCCCCCCCCCCCCCCC(=O)OC[C@@H](COC(=O)CCCCCCC/C=C\CCCCCCCC)OC(=O)CCCCCCC/C=C\CCCCCCCC	20	20	0.866626	0.775987	0.000429651	1.01528	2.65542	0.0012623
	ONLI_0245	TAG 50:3; TAG 16:0-16:0-18:3;	CSHPOS	WLFXGZDFDKIDIL-MXPUMGEASA-N	131750534	CCCCCCCCCCCCCCCC(=O)OC[C@@H](COC(=O)CCCCCCC/C=C\C/C=C\C/C=C\CC)OC(=O)CCCCCCCCCCCCCCC	20	20	0.998201	0.641141	4.84e-06	1.23702	1.98137	2.21e-05
	ONLI_0246	TAG 54:4; TAG 16:0-18:0-20:4;	CSHPOS	IBSUTTNKAUSOHR-WPQPACDXSA-N	131750342	CCCCCCCCCCCCCCCCCC(=O)O[C@@H](COC(=O)CCCCCCCCCCCCCCC)COC(=O)CCC/C=C\C/C=C\C/C=C\C/C=C\CCCCC	20	20	0.996833	0.981729	0.155764	0.414812	1.12	0.243476
	ONLI_0247	Cer-NS d35:1; Cer-NS d18:1/17:0;	CSHPOS	ICWGMOFDULMCFL-QKSCFGQVSA-N	44584335	CCCCCCCCCCCCCCCCC(=O)N[C@@H](CO)[C@@H](/C=C/CCCCCCCCCCCCC)O	20	19	0.934576	0.970122	0.014511	0.694418	1.06131	0.0298756
	ONLI_0249	PC 16:0-22:6	CSHPOS	IESVDEZGAHUQJU-ZLBXKVHBSA-N	6441886	CCCCCCCCCCCCCCCC(=O)OC[C@H](COP(=O)([O-])OCC[N+](C)(C)C)OC(=O)CC/C=C\C/C=C\C/C=C\C/C=C\C/C=C\C/C=C\CC	20	20	1	0.948193	2.19e-06	1.29369	1.43351	1.06e-05
	ONLI_0250	TAG 48:4; TAG 12:0-18:1-18:3;	CSHPOS	0	NA	0	20	20	0.999661	0.838385	3.2e-05	1.13728	2.37231	0.000120344
	ONLI_0251	PC40:5 A	CSHPOS	IJTJDJOOHZVSAC-NDRUHXFFSA-N	53479083	CCCCCCCC/C=C\CCCCCCCCCC(=O)O[C@H](COC(=O)CCCCCC/C=C\C/C=C\C/C=C\C/C=C\CC)COP(=O)([O-])OCC[N+](C)(C)C	20	20	0.93076	0.735587	6e-09	1.49921	1.94007	5.89e-08
	ONLI_0252	CE (20:4)	CSHPOS	IMXSFYNMSOULQS-BEDFLICRSA-N	6479222	CCCCC/C=C\C/C=C\C/C=C\C/C=C\CCCC(=O)O[C@H]1CC[C@@]2([C@H]3CC[C@]4([C@H]([C@@H]3CC=C2C1)CC[C@@H]4[C@H](C)CCCC(C)C)C)C	20	20	0.859723	0.635324	0.566132	-0.183711	0.999073	0.675165
	ONLI_0254	TAG 50:4; TAG 14:0-18:2-18:2;	CSHPOS	UVOGHPPAYFAQIT-AVIDDATOSA-N	131753663	CCCCCCCCCCCCCC(=O)OC[C@@H](COC(=O)CCCCCCC/C=C\C/C=C\CCCCC)OC(=O)CCCCCCC/C=C\C/C=C\CCCCC	20	20	0.996253	0.861678	1.31e-05	1.20574	2.42756	5.29e-05
	ONLI_0255	TAG 56:6; TAG 18:0-18:2-20:4;	CSHPOS	CKEOSPBKHRUVTN-WDVRSESKSA-N	131750374	CCCCCCCCCCCCCCCCCC(=O)OC[C@@H](COC(=O)CCC/C=C\C/C=C\C/C=C\C/C=C\CCCCC)OC(=O)CCCCCCC/C=C\C/C=C\CCCCC	20	20	0.975304	0.833593	0.00257562	0.863737	1.46627	0.00632488
	ONLI_0256	TAG 58:4; TAG 18:1-18:2-22:1;	CSHPOS	ODZGUPAQUQGEKA-MJECLYFESA-N	131760188	CCCCCCCC/C=C\CCCCCCCCCCCC(=O)OC[C@H](COC(=O)CCCCCCCCC/C=C\CCCCCC)OC(=O)CCCCCCC/C=C\C/C=C\CCCCC	19	20	0.66097	0.744427	1.45e-08	1.46797	4.50421	1.23e-07
	ONLI_0257	CE ( 22:4)	CSHPOS	ITGTXSFLBABXQA-BMURBKCOSA-N	16061341	CCCCC/C=C\C/C=C\C/C=C\C/C=C\CCCCCC(=O)O[C@H]1CC[C@@]2([C@H]3CC[C@]4([C@H]([C@@H]3CC=C2C1)CC[C@@H]4[C@H](C)CCCC(C)C)C)C	20	20	0.99519	0.857248	0.756625	0.0976644	1.51245	0.820867
	ONLI_0258	SMd41:2 A	CSHPOS	JBDGKEXQKCCQFK-JWQIMADESA-N	52931209	CCCCCCCCCCCCCCCCCCCCCCC(=O)N[C@@H](COP(=O)([O-])OCC[N+](C)(C)C)[C@@H](/C=C/CCCCCCCC/C=C\CCC)O	20	20	0.968121	0.970986	0.000106966	1.0913	1.26112	0.000350932
	ONLI_0259	TAG 53:3; TAG 17:0-18:1-18:2;	CSHPOS	JCUUGUUICZELJG-KDHVXLOFSA-N	138183776	CCCCCCCCCCCCCCCCC(=O)OCC(COC(=O)CCCCCCCC/C=C\C=C/CCCCC)OC(=O)CCCCCCCCC/C=C\CCCCCC	20	20	0.966088	0.999014	0.000466563	1.00919	1.91265	0.00135102
	ONLI_0260	TAG 60:3; TAG 18:2-20:1-22:0;	CSHPOS	LEZBCWXJJZZACU-NYUYSZTLSA-N	25240389	CCCCCCCCCCCCCCCCCCCCCC(=O)OC[C@@H](COC(=O)CCCCCCC/C=C\C/C=C\CCCCC)OC(=O)CCCCCCCCC/C=C\CCCCCCCC	20	20	0.894046	0.225539	0.0126642	0.729925	1.98071	0.0266877
	ONLI_0261	TAG 58:6; TAG 18:1-20:1-20:4;	CSHPOS	GSNFRUMSEHHPSY-ZGZATPIUSA-N	131750413	CCCCCCCC/C=C\CCCCCCCCCC(=O)O[C@@H](COC(=O)CCCCCCC/C=C\CCCCCCCC)COC(=O)CCC/C=C\C/C=C\C/C=C\C/C=C\CCCCC	20	20	0.984734	0.98483	0.00064988	0.992282	1.93402	0.00179162
	ONLI_0262	TAG 55:3; TAG 15:0-19:0-21:3;	CSHPOS	0	NA	0	20	20	1	0.874196	1.41e-06	1.27587	2.42066	7.07e-06
	ONLI_0263	PC34:2	CSHPOS	JLPULHDHAOZNQI-ZTIMHPMXSA-N	5287971	CCCCCCCCCCCCCCCC(=O)OC[C@H](COP(=O)([O-])OCC[N+](C)(C)C)OC(=O)CCCCCCC/C=C\C/C=C\CCCCC	20	20	0.819413	0.945226	1.85e-08	1.45582	1.5116	1.49e-07
	ONLI_0264	TAG 60:12; TAG 18:2-20:4-22:6;	CSHPOS	LVEQOBLTSBRKGQ-WVQHRUTQSA-N	131763347	CCCCC/C=C\C/C=C\CCCCCCCC(=O)OC[C@@H](COC(=O)CC/C=C\C/C=C\C/C=C\C/C=C\C/C=C\C/C=C\CC)OC(=O)CCC/C=C\C/C=C\C/C=C\C/C=C\CCCCC	20	20	0.902969	0.713955	0.0227259	-0.702561	0.772268	0.0447874
	ONLI_0265	LPE20:4	CSHPOS	ROPRRXYVXLDXQO-XSQXPFHXSA-N	42607465	CCCCC/C=C\C/C=C\C/C=C\C/C=C\CCCC(=O)OC[C@H](COP(=O)(O)OCCN)O	20	20	0.998306	0.935004	0.687209	-0.129024	0.961222	0.765879
	ONLI_0266	TAG 49:3; TAG 15:0-16:1-18:2;	CSHPOS	CQSXCZMDDSQLAG-RLFYQNGLSA-N	131754333	CCCCCCCCCCCCCCC(=O)OC[C@@H](COC(=O)CCCCCCC/C=C\C/C=C\CCCCC)OC(=O)CCCCCCC/C=C\CCCCCC	20	20	0.844347	0.997976	4.72e-07	1.34708	3.3064	2.74e-06
	ONLI_0267	TAG 48:0; TAG 14:0-16:0-18:0;	CSHPOS	JTDPHURHZMZJHD-DYVQZXGMSA-N	131753268	CCCCCCCCCCCCCCCCCC(=O)OC[C@H](COC(=O)CCCCCCCCCCCCC)OC(=O)CCCCCCCCCCCCCCC	20	20	0.918183	0.893955	0.778354	-0.0871442	1.05402	0.836548
	ONLI_0268	TAG 58:2; TAG 18:0-18:2-22:0;	CSHPOS	VTHDNMHRPKXWMZ-WMMWWMJFSA-N	131756084	CCCCCCCCCCCCCCCCCCCCCC(=O)OC[C@H](COC(=O)CCCCCCCCCCCCCCCCC)OC(=O)CCCCCCC/C=C\C/C=C\CCCCC	20	20	0.999193	0.992753	0.00296362	0.879523	2.18509	0.00714285
	ONLI_0269	TAG 46:0; TAG 14:0-16:0-16:0;	CSHPOS	JWVXCFSNEOMSHH-DXQCBLCSSA-N	91867460	CCCCCCCCCCCCCCCC(=O)OC[C@H](COC(=O)CCCCCCCCCCCCC)OC(=O)CCCCCCCCCCCCCCC	20	19	0.990711	0.824437	0.0922828	0.497504	1.24689	0.155739
	ONLI_0270	TAG 50:2; TAG 16:0-16:0-18:2;	CSHPOS	MTWYSKGJIDFSRC-IICCMCGVSA-N	25240356	CCCCCCCCCCCCCCCC(=O)OC[C@H](COC(=O)CCCCCCC/C=C\C/C=C\CCCCC)OC(=O)CCCCCCCCCCCCCCC	20	20	0.995326	0.949834	0.000181534	1.06776	2.49132	0.000562057
	ONLI_0271	Cer d40:1	CSHPOS	CJROVRTUSFQVMR-GVOPMEMSSA-N	5283570	CCCCCCCCCCCCCCCCCCCCCCCCCC(=O)N[C@@H](CO)[C@@H](/C=C/CCCCCCCCCCCCC)O	20	20	0.260802	0.260802	4.92e-10	1.54222	3.03237	1.21e-08
	ONLI_0272	PCp-32:0 or PC o-32:1	CSHPOS	HJVQHTGUAIETCQ-VEAYGOGPSA-N	52923742	CCCCCCCCCCCCCCCCOC[C@H](COP(=O)([O-])OCC[N+](C)(C)C)OC(=O)CCCCCCC/C=C\CCCCCC	20	19	0.980133	0.982859	0.000107241	1.05131	1.20613	0.000350932
	ONLI_0273	TAG 58:0; TAG 18:0-18:0-22:0;	CSHPOS	KFFURWDSOSXFNL-XKJQNMSGSA-N	131755786	CCCCCCCCCCCCCCCCCCCCCC(=O)OC[C@H](COC(=O)CCCCCCCCCCCCCCCCC)OC(=O)CCCCCCCCCCCCCCCCC	20	20	0.722103	0.651736	0.569522	0.174976	1.21943	0.678203
	ONLI_0274	PE 38:7e; PE 16:1e/22:6; [M+H]+	CSHPOS	KGCPGAKRLOCUEV-ZLXBYIIJSA-N	138193153	CCCCCC/C=C\CCCCCCCCOCC(COP(=O)(O)OCCN)OC(=O)CC/C=C\C/C=C\C/C=C\C/C=C\C/C=C\C/C=C\CC	20	20	0.895848	0.3676	2.91e-09	1.51452	1.53505	3.55e-08
	ONLI_0275	PC16:0/16:0	CSHPOS	KILNVBDSWZSGLL-KXQOOQHDSA-N	452110	CCCCCCCCCCCCCCCC(=O)OC[C@H](COP(=O)([O-])OCC[N+](C)(C)C)OC(=O)CCCCCCCCCCCCCCC	19	20	0.351172	0.286415	0.00105401	0.900515	1.3199	0.00277281
	ONLI_0276	PC 36:5; PC 16:0-20:5;	CSHPOS	KLTHQSWIRFFBRI-RWSHWRRPSA-O	5313224	CCCCCCCCCCCCCCCC(=O)OCC(COP(=O)(O)OCC[N+](C)(C)C)OC(=O)CCC/C=C/C/C=C/C/C=C/C/C=C/C/C=C/CC	20	20	0.995812	0.960686	1.17e-05	1.22368	1.94446	4.78e-05
	ONLI_0277	PC38:3	CSHPOS	KNNHXKQRTYEWCA-HYYWERRFSA-N	53478919	CCCCCC/C=C\CCCCCCCCCC(=O)O[C@H](COC(=O)CCCCCCCCC/C=C\C/C=C\CCCCC)COP(=O)([O-])OCC[N+](C)(C)C	20	20	0.888259	0.510633	8.54e-05	1.11211	1.61142	0.000291264
	ONLI_0278	TAG 58:5; TAG 18:1-18:2-22:2;	CSHPOS	NRIOEETWLZWDRL-NUDAZDJUSA-N	131760195	CCCCCC/C=C\CCCCCCCCCC(=O)OC[C@@H](COC(=O)CCCCCCCCCCC/C=C\C/C=C\CCCCC)OC(=O)CCCCCCC/C=C\C/C=C\CCCCC	20	20	0.986469	0.842751	6.09e-08	1.38871	4.28254	4.27e-07
	ONLI_0280	PCo-40:6	CSHPOS	QBZALASVZLFAHF-KYPHJRDXSA-N	24779341	CCCCCCCCCCCCCCCCCCOC[C@H](COP(=O)([O-])OCC[N+](C)(C)C)OC(=O)CC/C=C\C/C=C\C/C=C\C/C=C\C/C=C\C/C=C\CC	20	20	0.991224	0.967005	0.492906	-0.217089	0.96015	0.606712
	ONLI_0281	TAG 49:1; TAG 15:0-16:0-18:1;	CSHPOS	KWXJMBTWCDOOOM-FMXLGRSFSA-N	131754160	CCCCCCCCCCCCCCCC(=O)O[C@@H](COC(=O)CCCCCCCCCCCCCC)COC(=O)CCCCCCCCC/C=C\CCCCCC	20	20	0.96752	0.99984	0.000548464	1.00844	2.06789	0.00156012
	ONLI_0282	PC38:2	CSHPOS	KXXLFCAPKGRXBT-FMJYHZMHSA-N	24779263	CCCCCCCCCCCCCCCCCCCC(=O)OC[C@H](COP(=O)([O-])OCC[N+](C)(C)C)OC(=O)CCCCCCC/C=C\C/C=C\CCCCC	20	20	0.260802	0.260802	5.67e-10	1.5524	4.49769	1.21e-08
	ONLI_0283	SMd32:1	CSHPOS	KYICBZWZQPCUMO-PSALXKTOSA-N	11433862	CCCCCCCCCCCCC/C=C/[C@H]([C@H](COP(=O)([O-])OCC[N+](C)(C)C)NC(=O)CCCCCCCCCCCCC)O	20	20	0.672473	0.387933	0.000435162	-1.01868	0.833895	0.00127384
	ONLI_0284	TAG 58:4; TAG 18:2-18:2-22:0;	CSHPOS	OEWUGNNMLZAOCV-HESLGCGWSA-N	25240386	CCCCCCCCCCCCCCCCCCCCCC(=O)OC[C@@H](COC(=O)CCCCCCC/C=C\C/C=C\CCCCC)OC(=O)CCCCCCC/C=C\C/C=C\CCCCC	20	20	0.986367	0.373893	2.28e-08	1.44296	3.64859	1.77e-07
	ONLI_0285	LPC 16:1	CSHPOS	LFUDDCMNKWEORN-ZXEGGCGDSA-N	24779461	CCCCCC/C=C\CCCCCCCC(=O)OC[C@H](COP(=O)([O-])OCC[N+](C)(C)C)O	20	20	0.975579	0.587499	6.03e-06	1.25059	1.80434	2.68e-05
	ONLI_0286	Cer-NS d37:4; Cer-NS d22:3/15:1;	CSHPOS	0	NA	0	20	20	0.991684	0.995242	0.403833	0.259371	1.0217	0.52688
	ONLI_0287	N-Octadecanoylsphing-4-enine-1-phosphocholine	CSHPOS	LKQLRGMMMAHREN-YJFXYUILSA-N	6453725	CCCCCCCCCCCCCCCCCC(=O)N[C@@H](COP(=O)([O-])OCC[N+](C)(C)C)[C@@H](/C=C/CCCCCCCCCCCCC)O	19	20	0.709717	0.998351	3.71e-08	-1.44314	0.49238	2.67e-07
	ONLI_0288	SMd36:1	CSHPOS	LKQLRGMMMAHREN-YJFXYUILSA-O	5283588	CCCCCCCCCCCCCCCCCC(=O)N[C@@H](COP(=O)(O)OCC[N+](C)(C)C)[C@@H](/C=C/CCCCCCCCCCCCC)O	20	20	0.418682	0.626264	6.76e-10	-1.56113	0.506798	1.33e-08
	ONLI_0289	LPC 17:1	CSHPOS	LPMGFNAQZPADDZ-FJIRUFBNSA-N	24779451	CCCCCCC/C=C\CCCCCCCC(=O)OC[C@H](COP(=O)([O-])OCC[N+](C)(C)C)O	20	20	1	0.969755	1.45e-07	1.39218	1.62568	9.37e-07
	ONLI_0290	SMd33:1	CSHPOS	LQINJRUGTUOHGS-YPDYIYJKSA-N	52931139	CCCCCCCCCCCCCCC(=O)N[C@@H](COP(=O)([O-])OCC[N+](C)(C)C)[C@@H](/C=C/CCCCCCCCCCCCC)O	20	19	0.95683	0.95736	9.01e-07	-1.33139	0.773869	4.84e-06
	ONLI_0291	LPC 22:6	CSHPOS	LSOWKZULVQWMLY-APPDJCNMSA-N	10415542	CC/C=C\C/C=C\C/C=C\C/C=C\C/C=C\C/C=C\CCC(=O)OC[C@H](COP(=O)([O-])OCC[N+](C)(C)C)O	19	19	0.917021	0.603097	0.000966676	-0.890097	0.828107	0.00255978
	ONLI_0292	TAG 52:3; TAG 16:1-18:1-18:1;	CSHPOS	YBWITEZBUYUNFC-JZBMGIQCSA-N	102240596	CCCCCCCC/C=C\CCCCCCCC(=O)OC[C@H](COC(=O)CCCCCCC/C=C\CCCCCC)OC(=O)CCCCCCC/C=C\CCCCCCCC	20	20	0.854499	0.946182	0.000792887	0.950072	1.76943	0.0021347
	ONLI_0293	TAG 51:4; TAG 15:0-16:0-20:4;	CSHPOS	LVHOHHSODZICOO-IIKXJSSRSA-N	131750647	CCCCCCCCCCCCCCCC(=O)O[C@@H](COC(=O)CCCCCCCCCCCCCC)COC(=O)CCC/C=C\C/C=C\C/C=C\C/C=C\CCCCC	20	20	0.986589	0.833887	3.39e-05	1.14526	1.94168	0.000126272
	ONLI_0294	TAG 56:6; TAG 16:0-18:1-22:5;	CSHPOS	LXKOOMKDVRTCPD-NMQVVHJTSA-N	131755185	CCCCCCCCCCCCCCCC(=O)OC[C@@H](COC(=O)CCCCC/C=C\C/C=C\C/C=C\C/C=C\C/C=C\CC)OC(=O)CCCCCCCCC/C=C\CCCCCC	20	20	0.989948	0.66349	0.00257709	0.881724	1.59886	0.00632488
	ONLI_0295	SM d42:3; SM d14:1/28:2;	CSHPOS	0	NA	0	20	20	0.975421	0.999921	0.0265218	0.651031	1.12138	0.0511991
	ONLI_0296	PC 40:8; PC 20:4-20:4;	CSHPOS	LZLVZIFMYXDKCN-QJWFYWCHSA-N	24779076	CCCCC/C=C\C/C=C\C/C=C\C/C=C\CCCC(=O)OC[C@H](COP(=O)([O-])OCC[N+](C)(C)C)OC(=O)CCC/C=C\C/C=C\C/C=C\C/C=C\CCCCC	20	20	0.418682	0.626264	1.03e-09	1.51942	1.79402	1.69e-08
	ONLI_0299	TAG 51:4; TAG 16:0-17:2-18:2;	CSHPOS	MBVRTVOCODAFTO-ZQYFXHSESA-N	138208584	CCCCCCCCCCCCCCCC(=O)OCC(COC(=O)CCCCCCCC/C=C\C=C/CCCCC)OC(=O)CCCCCCCCC/C=C\C/C=C\CC	20	20	0.835913	0.779619	6.72e-06	1.2261	2.18803	2.92e-05
	ONLI_0300	PC37:2	CSHPOS	MCZUABDVGPPWPM-HJTCUGKVSA-N	52922735	CCCCCCCCCCCCCCCCCCC(=O)O[C@H](COC(=O)CCCCCCC/C=C\C/C=C\CCCCC)COP(=O)([O-])OCC[N+](C)(C)C	20	20	0.260802	0.260802	5.19e-10	1.54462	2.83987	1.21e-08
	ONLI_0301	TAG 52:3; TAG 16:0-18:0-18:3;	CSHPOS	QRLNWUKVSNTXQG-VWMLCLGZSA-N	131755026	CCCCCCCCCCCCCCCCCC(=O)O[C@@H](COC(=O)CCCCCCCCCCCCCCC)COC(=O)CCCCCCC/C=C\C/C=C\C/C=C\CC	20	20	0.892741	0.979177	0.0338744	0.627729	1.15599	0.0635639
	ONLI_0302	SMd38:2	CSHPOS	MDRFMTLYKHBJTF-NQYLGBTJSA-N	52931179	CCCCCCCCCCCCC/C=C/[C@H]([C@H](COP(=O)([O-])OCC[N+](C)(C)C)NC(=O)CCCCCCCCC/C=C\CCCCCCCC)O	20	20	0.999767	0.8552	3.41e-08	1.40708	1.64152	2.54e-07
	ONLI_0303	PC35:1	CSHPOS	MFHIZGSSDZJFKD-IYEJTHTFSA-N	52922679	CCCCCCCCCCCCCCCCC(=O)O[C@H](COC(=O)CCCCCCC/C=C\CCCCCCCC)COP(=O)([O-])OCC[N+](C)(C)C	20	20	0.741763	0.410589	1.69e-09	1.53078	2.03185	2.36e-08
	ONLI_0304	TAG 60:1; TAG 18:1-20:0-22:0;	CSHPOS	MFTJGJJGQONILX-RXNSVRMPSA-N	131757302	CCCCCCCCCCCCCCCCCCCCCC(=O)OC[C@@H](COC(=O)CCCCCCCCC/C=C\CCCCCC)OC(=O)CCCCCCCCCCCCCCCCCCC	19	20	0.0406996	0.000820557	0.0280266	0.540368	2.47456	0.0537177
	ONLI_0306	PC35:2 A	CSHPOS	MJWAVUYQCBFFHQ-WESJWMGVSA-N	52922721	CCCCCCCCCCCCCCCCC(=O)O[C@H](COC(=O)CCCCCCC/C=C\C/C=C\CCCCC)COP(=O)([O-])OCC[N+](C)(C)C	20	20	0.98306	0.506993	5.95e-09	1.48818	1.6701	5.89e-08
	ONLI_0307	TAG 53:3; TAG 17:0-17:0-19:3;	CSHPOS	0	NA	0	20	20	0.994791	0.707243	0.000190215	1.02469	1.82002	0.000584507
	ONLI_0308	CE (20:3)	CSHPOS	MLPRJPSMAFZPLA-PJSAOELNSA-N	53477892	CCCCC/C=C\C/C=C\C/C=C\CCCCCCC(=O)O[C@H]1CC[C@@]2(C3CC[C@]4(C(C3CC=C2C1)CCC4[C@H](C)CCCC(C)C)C)C	20	19	0.890363	0.937413	0.00270967	0.887927	1.89707	0.00658999
	ONLI_0310	DAG 36:4; DAG 18:2-18:2;	CSHPOS	MQGBAQLIFKSMEM-ZHARMHCNSA-N	9543729	CCCCC/C=C\C/C=C\CCCCCCCC(=O)OC[C@H](CO)OC(=O)CCCCCCC/C=C\C/C=C\CCCCC	20	20	0.856811	0.304517	0.000266643	1.06285	1.52367	0.000797947
	ONLI_0311	TAG 55:4; TAG 18:1-18:2-19:1;	CSHPOS	MUPLOFIEWBEBDZ-GMWWFSEGSA-N	138214690	CCCCCCCCC/C=C\CCCCCCCC(=O)OCC(COC(=O)CCCCCCCCC/C=C\CCCCCC)OC(=O)CCCCCCCC/C=C\C=C/CCCCC	20	20	0.999904	0.999991	1.77e-05	1.19023	2.16252	7e-05
	ONLI_0312	TAG 48:4; TAG 12:0-18:2-18:2;	CSHPOS	MVLRQPPTISTJFW-ZHSZNRNPSA-N	138214981	CCCCCCCCCCCC(=O)OCC(COC(=O)CCCCCCCC/C=C\C=C/CCCCC)OC(=O)CCCCCCCC/C=C\C=C/CCCCC	20	20	0.925702	0.8921	0.000143383	1.08229	2.20275	0.000449119
	ONLI_0313	PE 18:1-18:1;	CSHPOS	MWRBNPKJOOWZPW-NYVOMTAGSA-N	9546757	CCCCCCCC/C=C\CCCCCCCC(=O)OC[C@H](COP(=O)(O)OCCN)OC(=O)CCCCCCC/C=C\CCCCCCCC	20	20	0.970764	0.526852	2.35e-07	1.35955	2.09324	1.41e-06
	ONLI_0314	CE (18:2)	CSHPOS	NAACPBBQTFFYQB-XHDSEGDBSA-N	131801653	CCCCC/C=C\C/C=C\CCCCCCCC(=O)O[C@H]1CC[C@@]2(C3CC[C@]4(C(C3CC=C2C1)CCC4[C@H](C)CCCC(C)C)C)C	20	20	0.959833	0.998855	0.000797936	0.958912	1.36801	0.00214113
	ONLI_0315	TAG 54:8; TAG 16:0-18:3-20:5;	CSHPOS	MLMMWEQUUKJWQX-VOLMLRHSSA-N	131755359	CCCCCCCCCCCCCCCC(=O)OC[C@@H](COC(=O)CCC/C=C\C/C=C\C/C=C\C/C=C\C/C=C\CC)OC(=O)CCCC/C=C\C/C=C\C/C=C\CCCCC	20	20	0.99896	0.999999	1.95e-06	1.25164	2.03326	9.59e-06
	ONLI_0316	SMd36:2	CSHPOS	NBEADXWAAWCCDG-QDDWGVBQSA-N	6443882	CCCCCCCCCCCCC/C=C/[C@H]([C@H](COP(=O)([O-])OCC[N+](C)(C)C)NC(=O)CCCCCCC/C=C\CCCCCCCC)O	20	20	0.870046	0.99996	6.23e-08	-1.43703	0.692915	4.32e-07
	ONLI_0317	PC 42:10; PC 20:4-22:6;	CSHPOS	APEHGLQXFOZAEF-MHNOHXJZSA-N	52923327	CCCCC/C=C\C/C=C\C/C=C\C/C=C\CCCC(=O)OC[C@H](COP(=O)([O-])OCC[N+](C)(C)C)OC(=O)CC/C=C\C/C=C\C/C=C\C/C=C\C/C=C\C/C=C\CC	20	20	0.410042	0.497908	9.35e-10	1.5336	2.15374	1.69e-08
	ONLI_0318	TAG 56:8; TAG 18:2-18:3-20:3;	CSHPOS	MWPUONRBGFMSLE-FXGUSIRISA-N	131763293	CCCCC/C=C\C/C=C\CCCCCCCC(=O)OC[C@@H](COC(=O)CCCCCC/C=C\C/C=C\C/C=C\CCCCC)OC(=O)CCCC/C=C\C/C=C\C/C=C\CCCCC	20	20	0.999955	0.98249	0.977816	-0.00864065	1.01117	0.985159
	ONLI_0319	TAG 55:4; TAG 15:1-19:0-21:3;	CSHPOS	NJIJHXNPEZSWHJ-GGRUKSBGSA-N	138219306	CCCCCCCCCCCCCCCCCCC(=O)OC(COC(=O)CCCCCCC/C=C\CCCCC)COC(=O)CCCCCCC/C=C\C=C/C=C\CCCCCCC	20	20	0.995344	0.953444	7.89e-06	1.17917	2.12601	3.38e-05
	ONLI_0320	PC36:4 A	CSHPOS	NKQPOVROGSWLTO-NVPMBMBWSA-N	52922783	CCCCCCCC/C=C\CCCCCCCC(=O)O[C@H](COC(=O)CCCC/C=C\C/C=C\C/C=C\CCCCC)COP(=O)([O-])OCC[N+](C)(C)C	20	20	0.999995	0.970744	8.07e-07	1.35252	1.33994	4.42e-06
	ONLI_0321	PCo-42:5	CSHPOS	NLEDXBSUDVLSEN-UFFJXODHSA-N	52924034	CCCCCCCCCCCCCCCCCC/C=C\OC[C@H](COP(=O)([O-])OCC[N+](C)(C)C)OC(=O)CCCCC/C=C\C/C=C\C/C=C\C/C=C\CCCCC	20	20	0.488752	0.383617	0.347067	0.300161	1.07729	0.467206
	ONLI_0322	TAG 54:4; TAG 16:1-18:0-20:3;	CSHPOS	IJAGVFPXKMAQRV-PGYKOVLESA-N	131759314	CCCCCCCCCCCCCCCCCC(=O)O[C@@H](COC(=O)CCCCCCC/C=C\CCCCCC)COC(=O)CCC/C=C\C/C=C\C/C=C\CCCCCCCC	20	20	0.793293	0.875651	0.0141117	0.722859	1.49332	0.0292048
	ONLI_0323	PC 36:0; PC 18:0-18:0;	CSHPOS	NRJAVPSFFCBXDT-HUESYALOSA-N	94190	CCCCCCCCCCCCCCCCCC(=O)OC[C@H](COP(=O)([O-])OCC[N+](C)(C)C)OC(=O)CCCCCCCCCCCCCCCCC	20	20	0.812302	0.81241	5.67e-08	-1.44325	0.687514	4e-07
	ONLI_0324	PE 36:5e; PE 16:0e/20:5;	CSHPOS	NTBDNAWCQLUDHG-CEGBOXLASA-N	52925030	CCCCCCCCCCCCCCCCOC[C@H](COP(=O)(O)OCCN)OC(=O)CCC/C=C\C/C=C\C/C=C\C/C=C\C/C=C\CC	20	20	0.744807	0.46002	0.00549676	0.829254	1.17348	0.0123624
	ONLI_0325	PC16:0/18:2	CSHPOS	NVWYLRLKCCCUBZ-UOBGCCIWSA-N	134753865	CCCCCCCCCCCCCCCC(=O)OC[C@H](COP(=O)([O-])OCC[N+](C)(C)C)OC(=O)CCCC/C=C/C/C=C/CCCCCCCC	19	20	0.730582	0.997378	1.85e-06	-1.28483	0.876966	9.2e-06
	ONLI_0326	TAG 44:1; TAG 12:0-16:0-16:1;	CSHPOS	OBZBCSUQYLLPST-BZZOAKBMSA-N	138225270	CCCCCCCCCCCCCCCC(=O)OC(COC(=O)CCCCCCCCCCC)COC(=O)CCCCC/C=C\CCCCCCCC	20	20	0.0899216	0.00396257	0.0791927	0.505232	1.34668	0.13651
	ONLI_0327	PC33:1	CSHPOS	OFRWLQSOUIZELQ-VEAYGOGPSA-N	52922442	CCCCCCCCCCCCCCCCC(=O)O[C@H](COC(=O)CCCCCCC/C=C\CCCCCC)COP(=O)([O-])OCC[N+](C)(C)C	20	20	0.741763	0.410589	1.69e-09	1.52569	2.9557	2.36e-08
	ONLI_0328	TAG 54:5; TAG 18:0-18:2-18:3;	CSHPOS	FOOVNYMOCOZYCS-FEJMAITCSA-N	131756093	CCCCCCCCCCCCCCCCCC(=O)OC[C@@H](COC(=O)CCCC/C=C\C/C=C\C/C=C\CCCCC)OC(=O)CCCCCCC/C=C\C/C=C\CCCCC	20	20	0.903337	0.997412	0.0515919	0.587902	1.39638	0.0920182
	ONLI_0329	TAG 56:8; TAG 16:1-18:1-22:6;	CSHPOS	OBEVBHFXQRTJAZ-AAMJSBRJSA-N	131759453	CCCCCC/C=C\CCCCCCCCCC(=O)O[C@@H](COC(=O)CCCCCCC/C=C\CCCCCC)COC(=O)CC/C=C\C/C=C\C/C=C\C/C=C\C/C=C\C/C=C\CC	20	20	0.883481	0.956628	0.197169	0.397708	1.09505	0.298278
	ONLI_0330	PC37:3	CSHPOS	WZCLAXMADUBPSG-RIXBAXMTSA-N	52922657	CCCCCCCCCCCCCCCCCC(=O)OC[C@H](COP(=O)([O-])OCC[N+](C)(C)C)OC(=O)CCCCCCC/C=C\C/C=C\C/C=C\CC	20	20	0.849345	0.979648	1.41e-08	1.4433	1.69951	1.21e-07
	ONLI_0331	DAG 24:0; DAG 12:0-12:0;	CSHPOS	OQQOAWVKVDAJOI-UHFFFAOYSA-N	33979	CCCCCCCCCCCC(=O)OCC(CO)OC(=O)CCCCCCCCCCC	20	19	0.90869	0.620419	0.0165835	0.707974	1.10447	0.0337115
	ONLI_0332	PC35:4	CSHPOS	ZSWHHKKYMMYPPD-MSZSINMWSA-N	52922330	CCCCCCCCCCCCCCC(=O)OC[C@H](COP(=O)([O-])OCC[N+](C)(C)C)OC(=O)CCC/C=C\C/C=C\C/C=C\C/C=C\CCCCC	20	20	0.3676	0.895848	2.74e-09	1.50669	1.63002	3.44e-08
	ONLI_0333	TAG 56:1; TAG 16:0-18:1-22:0;	CSHPOS	OZXLEWFIONDQJM-SKYDHSLNSA-N	131755163	CCCCCCCCCCCCCCCCCCCCCC(=O)OC[C@H](COC(=O)CCCCCCCCCCCCCCC)OC(=O)CCCCCCCCC/C=C\CCCCCC	20	20	0.896595	0.93885	7.75e-05	1.08265	2.91948	0.000269953
	ONLI_0334	TAG 46:1; TAG 14:0-16:0-16:1;	CSHPOS	JYICXCHHKWVGEI-FIZKWYBOSA-N	131753273	CCCCCCCCCCCCCCCC(=O)O[C@@H](COC(=O)CCCCCCCCCCCCC)COC(=O)CCCCCCC/C=C\CCCCCC	20	20	0.812195	0.694142	0.000385527	1.03168	2.64927	0.00114099
	ONLI_0335	LPC 22:1	CSHPOS	PAFOXYLFALKPOE-BKAVPCLVSA-N	53480471	CCCCCCCC/C=C\CCCCCCCCCCCC(=O)OC[C@H](COP(=O)([O-])OCC[N+](C)(C)C)O	20	20	0.260802	0.260802	5.01e-10	1.54296	2.88835	1.21e-08
	ONLI_0336	SMd32:2	CSHPOS	PEJGMBUENJSLLH-RHAKMSQVSA-N	52931131	CCCCCCCCCCCCCC(=O)N[C@@H](COP(=O)([O-])OCC[N+](C)(C)C)[C@@H](/C=C/CCCCCCCC/C=C\CCC)O	20	20	0.153088	0.00402652	0.201191	0.375363	1.12093	0.303294
	ONLI_0337	DAG 36:5; DAG 18:2-18:3;	CSHPOS	PGXBELQFNRPKBC-WBVIKXMWSA-N	9543737	CCCCC/C=C\C/C=C\CCCCCCCC(=O)OC[C@H](CO)OC(=O)CCCCCCC/C=C\C/C=C\C/C=C\CC	20	20	0.8621	0.855526	0.000774269	0.996372	1.62437	0.00209157
	ONLI_0338	TAG 42:0; TAG 12:0-14:0-16:0;	CSHPOS	PGZSAELMQZLYOA-WBCKFURZSA-N	131803451	CCCCCCCCCCCCCCCC(=O)OC[C@H](COC(=O)CCCCCCCCCCC)OC(=O)CCCCCCCCCCCCC	20	20	0.0365706	0.0110069	0.637022	0.136521	1.08687	0.727379
	ONLI_0339	PCp-40:7 or PC o-40:8	CSHPOS	PWAHARWXEAMNGK-VCDFOAEJSA-N	53480839	CCCCCCCC/C=C\CCCCCC/C=C\OC[C@H](COP(=O)([O-])OCC[N+](C)(C)C)OC(=O)CC/C=C\C/C=C\C/C=C\C/C=C\C/C=C\C/C=C\CC	20	20	0.999255	0.981477	0.000192937	1.05014	1.48427	0.000590549
	ONLI_0340	TAG 54:6; TAG 18:1-18:2-18:3;	CSHPOS	OTUIORVXGJUHBH-JBQDKWDBSA-N	100921577	CCCCCCCC/C=C\CCCCCCCC(=O)OC[C@@H](COC(=O)CCCCCCC/C=C\C/C=C\C/C=C\CC)OC(=O)CCCCCCC/C=C\C/C=C\CCCCC	20	20	0.791908	0.84848	0.0462564	0.603738	1.73764	0.0834657
	ONLI_0341	LPE 18:1	CSHPOS	PYVRVRFVLRNJLY-MZMPXXGTSA-N	9547071	CCCCCCCC/C=C\CCCCCCCC(=O)OC[C@H](COP(=O)(O)OCCN)O	19	20	0.628065	0.978427	0.0754782	0.551122	1.13928	0.130948
	ONLI_0342	PC34:0	CSHPOS	PZNPLUBHRSSFHT-RRHRGVEJSA-N	24778686	CCCCCCCCCCCCCCCCCC(=O)O[C@H](COC(=O)CCCCCCCCCCCCCCC)COP(=O)([O-])OCC[N+](C)(C)C	19	20	0.713656	0.837539	0.0730978	-0.515335	0.918972	0.127367
	ONLI_0343	SMd42:1	CSHPOS	QEDPUVGSSDPBMD-XTAIVQBESA-O	5283595	CCCCCCCCCCCCCCCCCCCCCCCC(=O)N[C@@H](COP(=O)(O)OCC[N+](C)(C)C)[C@@H](/C=C/CCCCCCCCCCCCC)O	20	20	0.948457	0.8464	0.0127938	0.762876	1.21617	0.0268204
	ONLI_0344	PCo-34:3	CSHPOS	QEWRXEALGMKRGP-MZWPLUPDSA-N	24779293	CCCCCCCCCCCCCCCCOC[C@H](COP(=O)([O-])OCC[N+](C)(C)C)OC(=O)CCCC/C=C\C/C=C\C/C=C\CCCCC	20	20	0.898479	0.775071	1.84e-07	1.38523	1.60859	1.14e-06
	ONLI_0345	SMd34:0	CSHPOS	ANBFFIILUQJIQL-XFGXVVNZSA-N	9544103	CCCCCCCCCCCCCCCCC(=O)OC[C@H](COC(=O)CCCCCCC/C=C\CCCCCCCC)OC(=O)CCCCCCC/C=C\CCCCCCCC	20	20	0.998557	0.999481	0.889486	-0.0446261	1.00187	0.92154
	ONLI_0346	PC 32:1; PC 16:0-16:1;	CSHPOS	QIBZFHLFHCIUOT-NPBIGWJUSA-N	6443788	CCCCCCCCCCCCCCCC(=O)OC[C@H](COP(=O)([O-])OCC[N+](C)(C)C)OC(=O)CCCCCCC/C=C\CCCCCC	20	20	0.989622	0.651345	6.59e-09	1.4742	3.1633	6.24e-08
	ONLI_0347	TAG 58:9; TAG 18:1-18:2-22:6;	CSHPOS	NWOHTDXNYMHGGE-HAXGSABZSA-N	131760203	CCCCCC/C=C\CCCCCCCCCC(=O)OC[C@@H](COC(=O)CC/C=C\C/C=C\C/C=C\C/C=C\C/C=C\C/C=C\CC)OC(=O)CCCCCCC/C=C\C/C=C\CCCCC	20	20	0.992896	0.991301	0.518881	-0.204731	0.902441	0.630966
	ONLI_0348	PC39:6	CSHPOS	KSRURLYJRNYEOH-SHHFQLSYSA-N	24778795	CCCCCCCCCCCCCCCCC(=O)OC[C@H](COP(=O)([O-])OCC[N+](C)(C)C)OC(=O)CC/C=C\C/C=C\C/C=C\C/C=C\C/C=C\C/C=C\CC	20	20	0.998651	0.994007	0.000528424	1.01808	1.21124	0.00151922
	ONLI_0349	PC 38:6e; PC 16:0e/22:6;	CSHPOS	QQQQNYAHSSIZBU-HIQXTUQZSA-N	16759366	CCCCCCCCCCCCCCCCOC[C@H](COP(=O)([O-])OCC[N+](C)(C)C)OC(=O)CC/C=C\C/C=C\C/C=C\C/C=C\C/C=C\C/C=C\CC	19	19	0.992589	0.640575	1.01e-07	1.32055	1.96546	6.68e-07
	ONLI_0350	TAG 53:4; TAG 17:1-18:1-18:2;	CSHPOS	VESVDAJIPQIOEH-NAAHWEMHSA-N	9544155	CCCCCCCC/C=C\CCCCCCCC(=O)O[C@H](COC(=O)CCCCCCC/C=C\CCCCCCC)COC(=O)CCCCCCC/C=C\C/C=C\CCCCC	20	20	0.982585	0.995814	9.49e-05	1.09009	1.95348	0.000317035
	ONLI_0351	PC37:4	CSHPOS	QRPUCJXFPYFTMB-FBFLODOBSA-N	52922853	CCCCCCCCC/C=C\CCCCCCCC(=O)O[C@H](COC(=O)CCCCCCC/C=C\C/C=C\C/C=C\CC)COP(=O)([O-])OCC[N+](C)(C)C	20	20	0.631615	0.981121	0.0182312	0.728981	1.12055	0.0365077
	ONLI_0352	TAG 56:8; TAG 16:0-18:2-22:6;	CSHPOS	RDZINTYLBOTMAU-CQEMWSBKSA-N	131755335	CCCCCCCCCCCCCCCC(=O)OC[C@@H](COC(=O)CC/C=C\C/C=C\C/C=C\C/C=C\C/C=C\C/C=C\CC)OC(=O)CCCCCCC/C=C\C/C=C\CCCCC	20	20	0.991672	0.998924	0.0437693	0.610477	1.29576	0.0795356
	ONLI_0353	PC 40:8e; PC 18:2e/22:6;	CSHPOS	0	NA	0	20	20	0.722213	0.872239	0.138546	0.455371	1.15754	0.222874
	ONLI_0354	Heptadecasphing-4-enine	CSHPOS	RBEJCQPPFCKTRZ-LHMZYYNSSA-N	5283557	CCCCCCCCCCCC/C=C/[C@H]([C@H](CO)N)O	20	19	0.96974	0.839199	0.782611	-0.0869106	0.987245	0.840002
	ONLI_0355	AC 20:4;	CSHPOS	RBFQHRALHSUPIA-JTPUQHSZSA-N	136212424	CCCCC/C=C\C/C=C\C/C=C\C/C=C\CCCC(=O)O[C@H](CC(=O)[O-])C[N+](C)(C)C	19	20	0.991206	0.980119	0.00113965	-0.924236	0.648309	0.00296898
	ONLI_0356	TAG 52:1; TAG 16:0-18:0-18:1;	CSHPOS	NPCZZYKITFKRQZ-RFBIWTDZSA-N	5365005	CCCCCCCCCCCCCCCCCC(=O)OC(COC(=O)CCCCCCCCCCCCCCC)COC(=O)CCCCCCC/C=C\CCCCCCCC	20	20	0.931554	0.94657	0.0319171	0.64977	1.68128	0.0604547
	ONLI_0358	PCo-40:4	CSHPOS	RDNHPNJCALITSY-MBZSPAKGSA-N	52923852	CCCCCCCCCCCCCCCCCCCCOC[C@H](COP(=O)([O-])OCC[N+](C)(C)C)OC(=O)CCC/C=C\C/C=C\C/C=C\C/C=C\CCCCC	20	20	0.999762	0.999139	0.000606363	-1.01759	0.819338	0.00170672
	ONLI_0359	CE (20:2)	CSHPOS	REFJKOQDWJELKE-NJJZEKHRSA-N	53477891	CCCCC/C=C\C/C=C\CCCCCCCCCC(=O)O[C@H]1CC[C@@]2(C3CC[C@]4(C(C3CC=C2C1)CCC4[C@H](C)CCCC(C)C)C)C	20	19	0.999636	0.825778	0.00565778	0.805157	1.91651	0.0126867
	ONLI_0360	TAG 50:5; TAG 14:0-16:0-20:5;	CSHPOS	REVSLNKZXRDJPV-ROXMGXQMSA-N	131753291	CCCCCCCCCCCCCCCC(=O)O[C@@H](COC(=O)CCCCCCCCCCCCC)COC(=O)CCC/C=C\C/C=C\C/C=C\C/C=C\C/C=C\CC	20	20	0.990536	0.87218	1.97e-05	1.1782	2.3513	7.68e-05
	ONLI_0361	TAG 58:3; TAG 18:1-18:2-22:0;	CSHPOS	REWHXIGYTWQEOU-RUAITIBSSA-N	138251358	CCCCCCCCCCCCCCCCCCCCCC(=O)OCC(COC(=O)CCCCCCCCC/C=C\CCCCCC)OC(=O)CCCCCCCC/C=C\C=C/CCCCC	20	20	1	0.999996	4.26e-05	1.1429	2.63097	0.00015813
	ONLI_0362	CE (18:1)	CSHPOS	RJECHNNFRHZQKU-RMUVNZEASA-N	5283632	CCCCCCCC/C=C\CCCCCCCC(=O)O[C@H]1CC[C@@]2([C@H]3CC[C@]4([C@H]([C@@H]3CC=C2C1)CC[C@@H]4[C@H](C)CCCC(C)C)C)C	19	20	0.760782	0.85972	0.0202038	-0.702388	0.732622	0.0401581
	ONLI_0363	LPC 15:0	CSHPOS	RJZVWDTYEWCUAR-JOCHJYFZSA-N	24779458	CCCCCCCCCCCCCCC(=O)OC[C@H](COP(=O)([O-])OCC[N+](C)(C)C)O	20	20	0.981409	0.968505	0.00150289	0.920159	1.18888	0.00382855
	ONLI_0364	TAG 44:2; TAG 14:0-14:1-16:1;	CSHPOS	SGPSMGCUZQMTGS-CCRVATGYSA-N	131753421	CCCCCCCCCCCCCC(=O)OC[C@@H](COC(=O)CCCCCCC/C=C\CCCCCC)OC(=O)CCCCCCC/C=C\CCCC	20	20	0.165996	0.00145345	0.00839153	0.704731	1.79567	0.018062
	ONLI_0365	TAG 52:4; TAG 16:0-18:1-18:3;	CSHPOS	VMDPPWLXQNSYER-RPLIZZJZSA-N	131755181	CCCCCCCCCCCCCCCC(=O)OC[C@@H](COC(=O)CCCCCCC/C=C\C/C=C\C/C=C\CC)OC(=O)CCCCCCCCC/C=C\CCCCCC	20	20	0.99096	0.968634	0.000631887	0.976498	1.23886	0.00176539
	ONLI_0366	SMd34:1	CSHPOS	RWKUXQNLWDTSLO-GWQJGLRPSA-O	5283590	CCCCCCCCCCCCCCCC(=O)N[C@@H](COP(=O)(O)OCC[N+](C)(C)C)[C@@H](/C=C/CCCCCCCCCCCCC)O	20	19	0.968521	0.999581	6.05e-05	-1.14108	0.838933	0.000215407
	ONLI_0367	PC33:2	CSHPOS	SBNDHGBVMZMSNL-UESLNCBNSA-N	52922715	CCCCCCCCCCCCCCC(=O)O[C@H](COC(=O)CCCCCCC/C=C\C/C=C\CCCCC)COP(=O)([O-])OCC[N+](C)(C)C	20	20	0.681976	0.559054	1.69e-09	1.52874	1.87443	2.36e-08
	ONLI_0368	TAG 52:0; TAG 16:0-18:0-18:0;	CSHPOS	CEEXXJUVQPNYKF-IONAWPRUSA-N	131755032	CCCCCCCCCCCCCCCCCCOC[C@H](COC(=O)CCCCCCCCCCCCCCC)OC(=O)CCCCCCCCCCCCCCCCC	20	20	0.999661	0.999999	0.670421	-0.133319	0.963338	0.753755
	ONLI_0369	TAG 51:2; TAG 16:0-17:0-18:2;	CSHPOS	SEJGBQZTRJHHNJ-OCGDUTRDSA-N	138259707	CCCCCCCCCCCCCCCCC(=O)OC(COC(=O)CCCCCCCCCCCCCCC)COC(=O)CCCCCCCC/C=C\C=C/CCCCC	20	20	0.602177	0.927636	9.2e-05	1.11339	2.59191	0.000309745
	ONLI_0371	LPC 24:0	CSHPOS	SKJMUADLQLZAGH-WJOKGBTCSA-N	24779481	CCCCCCCCCCCCCCCCCCCCCCCC(=O)OC[C@H](COP(=O)([O-])OCC[N+](C)(C)C)O	20	19	0.771055	0.741452	0.000122665	1.02701	1.20969	0.00039498
	ONLI_0372	PC 36:2e; PC 18:1e/18:1;	CSHPOS	GSROTDACALJGFK-YIFANWOHSA-N	53481725	CCCCCCCC/C=C\CCCCCCCCOC[C@H](COP(=O)([O-])OCC[N+](C)(C)C)OC(=O)CCCCCCCCC/C=C\CCCCCC	20	20	0.999838	0.826547	1.07e-06	1.32689	1.36073	5.57e-06
	ONLI_0373	PC 36:2	CSHPOS	SNKAWJBJQDLSFF-NVKMUCNASA-N	10350317	CCCCCCCC/C=C\CCCCCCCC(=O)OC[C@H](COP(=O)([O-])OCC[N+](C)(C)C)OC(=O)CCCCCCC/C=C\CCCCCCCC	20	20	0.931608	0.717653	3.16e-05	1.15533	1.30421	0.000119328
	ONLI_0374	LPC 18:2	CSHPOS	SPJFYYJXNPEZDW-FTJOPAKQSA-N	11005824	CCCCC/C=C\C/C=C\CCCCCCCC(=O)OC[C@H](COP(=O)([O-])OCC[N+](C)(C)C)O	20	20	0.999823	0.98743	0.600474	-0.160361	0.992035	0.698528
	ONLI_0375	PC36:6	CSHPOS	SPWBDEZMKCRQSX-NGPPOSSDSA-N	52922847	CCCCC/C=C\C/C=C\C/C=C\CCCCC(=O)O[C@H](COC(=O)CCCCCCC/C=C\C/C=C\C/C=C\CC)COP(=O)([O-])OCC[N+](C)(C)C	20	20	0.371751	0.371751	7.12e-10	1.54025	3.68145	1.36e-08
	ONLI_0376	CE ( 22:1)	CSHPOS	SQHUGNAFKZZXOT-QXAJUEOOSA-N	16219158	CCCCCCCC/C=C\CCCCCCCCCCCC(=O)O[C@H]1CC[C@@]2([C@H]3CC[C@]4([C@H]([C@@H]3CC=C2C1)CC[C@@H]4[C@H](C)CCCC(C)C)C)C	20	20	0.948002	0.999639	0.848102	-0.0615077	0.958884	0.891563
	ONLI_0378	PE 36:4; PE 18:2-18:2;	CSHPOS	SSCDRSKJTAQNNB-DWEQTYCFSA-N	9546812	CCCCC/C=C\C/C=C\CCCCCCCC(=O)OC[C@H](COP(=O)(O)OCCN)OC(=O)CCCCCCC/C=C\C/C=C\CCCCC	20	19	0.999678	0.407559	3.94e-08	1.46304	2.78166	2.81e-07
	ONLI_0379	PC38:5 A	CSHPOS	SUACBSWYGWBPFC-GPUJSUHJSA-N	52923235	CCCCC/C=C\C/C=C\CCCCCCCC(=O)O[C@H](COC(=O)CCCCCC/C=C\C/C=C\C/C=C\CCCCC)COP(=O)([O-])OCC[N+](C)(C)C	20	20	0.972333	0.998772	0.00073321	0.99174	1.33094	0.00198732
	ONLI_0380	PCo-32:0	CSHPOS	SVWBXNAUENUONE-LDLOPFEMSA-N	173570	CCCCCCCCCCCCCCCCO[C@H](COC(=O)CCCCCCCCCCCCCCC)COP(=O)([O-])OCC[N+](C)(C)C	20	20	0.992469	0.524168	8.11e-09	1.49943	1.47171	7.33e-08
	ONLI_0381	SMd41:1	CSHPOS	SXZWBNWTCVLZJN-NMIJJABPSA-N	46891684	CCCCCCCCCCCCCCCCCCCCCCC(=O)N[C@@H](COP(=O)([O-])OCC[N+](C)(C)C)[C@@H](/C=C/CCCCCCCCCCCCC)O	20	20	0.999886	0.804234	8.79e-05	-1.13668	0.812751	0.000297309
	ONLI_0382	PC 40:7e; PC 18:1e/22:6;	CSHPOS	TXHZYNSTTCIWMJ-RXSQUPBGSA-N	42607430	CCCCCCCCCCCCCCCC/C=C\OC[C@H](COP(=O)([O-])OCC[N+](C)(C)C)OC(=O)CC/C=C\C/C=C\C/C=C\C/C=C\C/C=C\C/C=C\CC	20	20	0.50332	0.849737	0.138708	-0.466491	0.916506	0.222874
	ONLI_0383	TAG 47:2; TAG 14:0-16:1-17:1;	CSHPOS	TXTUHJQIYSFKNK-YWVGYDOYSA-N	138268019	CCCCCCCCCCCCCC(=O)OCC(COC(=O)CCCCC/C=C\CCCCCCCCC)OC(=O)CCCCC/C=C\CCCCCCCC	19	20	0.744437	2.23e-05	9.83e-05	0.963516	3.04602	0.000327032
	ONLI_0384	TAG 55:3; TAG 18:1-18:2-19:0;	CSHPOS	UAIFODZHZUTFRI-RUAITIBSSA-N	138268805	CCCCCCCCCCCCCCCCCCC(=O)OCC(COC(=O)CCCCCCCCC/C=C\CCCCCC)OC(=O)CCCCCCCC/C=C\C=C/CCCCC	20	20	0.998671	0.998675	6.61e-06	1.23692	2.52236	2.89e-05
	ONLI_0385	LPC 20:0	CSHPOS	UATOAILWGVYRQS-HHHXNRCGSA-N	24779473	CCCCCCCCCCCCCCCCCCCC(=O)OC[C@H](COP(=O)([O-])OCC[N+](C)(C)C)O	20	20	0.260802	0.260802	5.68e-10	1.55333	4.69806	1.21e-08
	ONLI_0386	TAG 52:4; TAG 16:0-18:2-18:2;	CSHPOS	LXAWUIOWWNQCQA-QOFSRLOCSA-N	97042228	CCCCCCCCCCCCCCCC(=O)OC[C@@H](COC(=O)CCCCCCC/C=C\C/C=C\CCCCC)OC(=O)CCCCCCC/C=C\C/C=C\CCCCC	20	20	0.985114	0.997866	0.00363247	0.852454	1.48771	0.00855011
	ONLI_0387	TAG 53:2; TAG 17:0-18:1-18:1;	CSHPOS	ANBFFIILUQJIQL-AWWAHHQNSA-N	131802077	CCCCCCCCCCCCCCCCC(=O)OC[C@@H](COC(=O)CCCCCCC/C=C\CCCCCCCC)OC(=O)CCCCCCC/C=C\CCCCCCCC	20	20	0.712798	0.965518	0.000198565	1.0607	2.17552	0.000603299
	ONLI_0388	TAG 40:0; TAG 12:0-14:0-14:0;	CSHPOS	UGBCBXMLXHJYBS-UHFFFAOYSA-N	5127847	CCCCCCCCCCCCCC(=O)OCC(COC(=O)CCCCCCCCCCC)OC(=O)CCCCCCCCCCCCC	20	20	0.726614	0.964409	0.424729	-0.244386	0.983643	0.545306
	ONLI_0389	TAG 52:2; TAG 16:0-18:0-18:2;	CSHPOS	MDCUASFVKLEFPW-NXNLMSDJSA-N	131750341	CCCCCCCCCCCCCCCCCC(=O)O[C@@H](COC(=O)CCCCCCCCCCCCCCC)COC(=O)CCCCCCC/C=C\C/C=C\CCCCC	20	20	0.914396	0.838911	0.00436561	0.851602	2.05331	0.0100237
	ONLI_0390	LPC 22:0	CSHPOS	UIINDYGXBHJQHX-GDLZYMKVSA-N	24779479	CCCCCCCCCCCCCCCCCCCCCC(=O)OC[C@H](COP(=O)([O-])OCC[N+](C)(C)C)O	20	20	0.996107	0.612541	5.49e-09	1.45482	1.57012	5.52e-08
	ONLI_0391	PC 16:0-14:0	CSHPOS	UIXXHROAQSBBOV-PSXMRANNSA-N	24778679	CCCCCCCCCCCCCCCC(=O)OC[C@H](COP(=O)([O-])OCC[N+](C)(C)C)OC(=O)CCCCCCCCCCCCC	20	19	0.999535	0.999884	1.66e-05	1.18832	1.27734	6.67e-05
	ONLI_0392	PC 35:3; PC 17:1-18:2;	CSHPOS	UJXPBTXUYBVHBS-SMHLTHDGSA-N	52922545	CCCCCCC/C=C\CCCCCCCC(=O)OC[C@H](COP(=O)([O-])OCC[N+](C)(C)C)OC(=O)CCCCCCC/C=C\C/C=C\CCCCC	19	20	0.196543	0.391702	0.69898	0.115839	1.03194	0.772911
	ONLI_0393	TAG 48:1; TAG 14:0-16:0-18:1;	CSHPOS	UPTISBGEYYYCRS-DLOIZKPKSA-N	131753274	CCCCCCCCCCCCCCCC(=O)O[C@@H](COC(=O)CCCCCCCCCCCCC)COC(=O)CCCCCCCCC/C=C\CCCCCC	20	20	0.99991	0.942406	0.000190237	1.07551	2.64289	0.000584507
	ONLI_0394	PCo-40:5	CSHPOS	UWNFEVACEPZILS-RNNLSGHUSA-N	52924022	CCCCCCCCCCCCCCCCCC/C=C\OC[C@H](COP(=O)([O-])OCC[N+](C)(C)C)OC(=O)CCC/C=C\C/C=C\C/C=C\C/C=C\CCCCC	20	20	0.999519	0.966099	0.0070346	0.821137	1.24885	0.0155147
	ONLI_0395	SM d40:3; SM d15:3/25:0;	CSHPOS	0	NA	0	20	20	0.260802	0.260802	5.5e-10	1.54839	2.45079	1.21e-08
	ONLI_0396	PC34:3 A	CSHPOS	VKVSSDKCKXJFIM-AFYHZPHLSA-N	52923213	CCCCCCCCCCCCCC(=O)O[C@H](COC(=O)CCCCCC/C=C\C/C=C\C/C=C\CCCCC)COP(=O)([O-])OCC[N+](C)(C)C	20	20	0.260802	0.260802	4.44e-10	1.53861	2.77047	1.21e-08
	ONLI_0397	Lyso-PAF C-16	CSHPOS	VLBPIWYTPAXCFJ-XMMPIXPASA-N	162126	CCCCCCCCCCCCCCCCOC[C@H](COP(=O)([O-])OCC[N+](C)(C)C)O	20	20	0.260802	0.260802	5.45e-10	1.56054	1.61166	1.21e-08
	ONLI_0398	TAG 60:12; TAG 16:0-22:6-22:6;	CSHPOS	VLEDHTUUVAXNOJ-WJBWTTGGSA-N	131755689	CCCCCCCCCCCCCCCC(=O)OC[C@@H](COC(=O)CC/C=C\C/C=C\C/C=C\C/C=C\C/C=C\C/C=C\CC)OC(=O)CC/C=C\C/C=C\C/C=C\C/C=C\C/C=C\C/C=C\CC	20	20	0.814732	0.994568	0.596225	-0.16219	0.933957	0.696829
	ONLI_0399	CE (22:6)	CSHPOS	VOEVEGPMRIYYKC-IWVSHIRDSA-N	53477890	CC/C=C\C/C=C\C/C=C\C/C=C\C/C=C\C/C=C\CCC(=O)O[C@H]1CC[C@@]2(C3CC[C@]4(C(C3CC=C2C1)CCC4[C@H](C)CCCC(C)C)C)C	19	20	0.745889	0.927655	0.0631096	0.55195	1.30793	0.110442
	ONLI_0400	TAG 58:8; TAG 18:1-18:1-22:6;	CSHPOS	VULLTLRIKFDMHX-IPUZCYPISA-N	131760077	CCCCCC/C=C\CCCCCCCCCC(=O)OC[C@@H](COC(=O)CC/C=C\C/C=C\C/C=C\C/C=C\C/C=C\C/C=C\CC)OC(=O)CCCCCCCCC/C=C\CCCCCC	20	20	0.99111	0.786477	0.635162	0.148186	1.0707	0.726286
	ONLI_0401	PCp-38:2 or PC o-38:3	CSHPOS	VXNFJZDUQIFCMO-WCXGAVHKSA-N	53480813	CCCCCCCC/C=C\CCCCCCCCCC(=O)O[C@H](CO/C=C\CCCCCC/C=C\CCCCCCCC)COP(=O)([O-])OCC[N+](C)(C)C	20	20	0.9912	0.939893	0.000129097	1.10127	1.51763	0.000409145
	ONLI_0402	LPC 14:0	CSHPOS	VXUOFDJKYGDUJI-OAQYLSRUSA-N	460604	CCCCCCCCCCCCCC(=O)OC[C@H](COP(=O)([O-])OCC[N+](C)(C)C)O	20	20	0.999657	0.999752	0.857659	-0.0548598	1.00727	0.899192
	ONLI_0403	PC 36:3e; PC 16:0e/20:3;	CSHPOS	VYKSGWCIVDQIQR-MEAIPJDCSA-N	16759365	CCCCCCCCCCCCCCCCOC[C@H](COP(=O)([O-])OCC[N+](C)(C)C)OC(=O)CCCCCC/C=C\C/C=C\C/C=C\CCCCC	20	20	0.952117	0.768542	4.82e-09	1.47888	1.59115	5.04e-08
	ONLI_0404	LPC p-18:0	CSHPOS	WBOMIOWRFSPZMC-AYICAFKVSA-N	24779527	CCCCCCCCCCCCCCCC/C=C\OC[C@H](COP(=O)([O-])OCC[N+](C)(C)C)O	19	20	0.673961	0.946574	0.00448241	0.825807	1.13284	0.010251
	ONLI_0405	TAG 49:2; TAG 15:0-16:0-18:2;	CSHPOS	DDWAXVHDVUVXSQ-ZDFZEWNHSA-N	131754166	CCCCCCCCCCCCCCCC(=O)O[C@@H](COC(=O)CCCCCCCCCCCCCC)COC(=O)CCCCCCC/C=C\C/C=C\CCCCC	20	20	0.866278	0.907155	0.000205114	1.04817	2.17173	0.000618414
	ONLI_0406	TAG 58:6; TAG 18:1-18:2-22:3;	CSHPOS	WCIIIQSFALPOGU-CIRMXUQZSA-N	138286297	CCCCCC/C=C\CCCCCCCCCC(=O)OCC(COC(=O)CCCCCCCCCCC/C=C\C/C=C\C/C=C\CC)OC(=O)CCCCCCCC/C=C\C=C/CCCCC	20	20	0.958391	0.524427	0.000406919	0.979583	1.79257	0.00119989
	ONLI_0407	TAG 56:9; TAG 16:1-18:2-22:6;	CSHPOS	NPWRXJYSKONMPV-SRVQGIHESA-N	131759576	CCCCCC/C=C\CCCCCCCC(=O)OC[C@@H](COC(=O)CC/C=C\C/C=C\C/C=C\C/C=C\C/C=C\C/C=C\CC)OC(=O)CCCCCCC/C=C\C/C=C\CCCCC	20	19	0.62988	0.625478	0.00934374	0.763085	1.32932	0.0199515
	ONLI_0408	LPC 18:3	CSHPOS	WKQNRCYKYCKESD-YVHLTTHBSA-N	24779469	CC/C=C\C/C=C\C/C=C\CCCCCCCC(=O)OC[C@H](COP(=O)([O-])OCC[N+](C)(C)C)O	19	20	0.795448	0.945414	0.00437056	0.825812	1.20965	0.0100237
	ONLI_0409	TAG 54:5; TAG 16:0-18:1-20:4;	CSHPOS	WKSLEDJKCJNITP-AHQIBYCWSA-N	131755177	CCCCCCCCCCCCCCCC(=O)OC[C@@H](COC(=O)CCC/C=C\C/C=C\C/C=C\C/C=C\CCCCC)OC(=O)CCCCCCCCC/C=C\CCCCCC	20	20	0.971519	0.992877	0.103867	0.494932	1.1628	0.174558
	ONLI_0410	N-Nervonoyl-D-erythro-sphingosylphosphorylcholine	CSHPOS	WKZHECFHXLTOLJ-QYKFWSDSSA-N	44260126	CCCCCCCCCCCCC/C=C/[C@H]([C@H](COP(=O)([O-])OCC[N+](C)(C)C)NC(=O)CCCCCCCCCCCCC/C=C\CCCCCCCC)O	20	20	0.814534	0.98511	0.0500703	0.575809	1.1903	0.0897697
	ONLI_0411	TAG 58:8; TAG 18:0-18:2-22:6;	CSHPOS	HHLFQZIIXPUFCA-KIZDZYDBSA-N	131756104	CCCCCCCCCCCCCCCCCC(=O)OC[C@@H](COC(=O)CC/C=C\C/C=C\C/C=C\C/C=C\C/C=C\C/C=C\CC)OC(=O)CCCCCCC/C=C\C/C=C\CCCCC	20	20	0.567267	0.877641	0.249665	-0.363366	0.860265	0.364755
	ONLI_0412	TAG 56:3; TAG 14:0-20:0-22:3;	CSHPOS	WOXDUJQRLLENEU-JYISLEBKSA-N	138290251	CCCCCCCCCCCCCCCCCCCC(=O)OC(COC(=O)CCCCCCCCCCCCC)COC(=O)CCCCCCCCCCC/C=C\C/C=C\C/C=C\CC	20	20	0.982615	0.67397	6.41e-09	1.43756	3.53361	6.14e-08
	ONLI_0413	TAG 53:4; TAG 16:0-17:0-20:4;	CSHPOS	WQFNYIJLJYJWKK-BNJGEZIZSA-N	134776734	CCCCCCCCCCCCCCCCC(=O)O[C@H](COC(=O)CCCCCCCCCCCCCCC)COC(=O)CCC/C=C/C/C=C/C/C=C/C/C=C/CCCCC	20	20	0.999611	0.876855	0.000112135	1.07054	1.76641	0.000362524
	ONLI_0414	PCp-42:3 or PC o-42:4	CSHPOS	CQZWFFADRVQCKP-SANZOQRGSA-N	52929632	CCCCCCCCCCCCCCCCCCCCOC[C@H](COP(=O)(O)O)OC(=O)CCCCC/C=C\C/C=C\C/C=C\C/C=C\CCCCC	20	20	0.913711	0.785029	0.259075	0.356016	1.13921	0.376453
	ONLI_0415	TAG 51:5; TAG 15:0-18:2-18:3;	CSHPOS	VEGWTLAYXMHOLL-HHBBQONFSA-N	131754537	CCCCCCCCCCCCCCC(=O)OC[C@@H](COC(=O)CCCCCCC/C=C\C/C=C\C/C=C\CC)OC(=O)CCCCCCC/C=C\C/C=C\CCCCC	20	20	0.998762	0.846239	0.000707988	0.973536	1.95201	0.00193854
	ONLI_0416	PC34:1	CSHPOS	WTJKGGKOPKCXLL-VYOBOKEXSA-N	5497103	CCCCCCCCCCCCCCCC(=O)OC[C@H](COP(=O)([O-])OCC[N+](C)(C)C)OC(=O)CCCCCCC/C=C\CCCCCCCC	20	20	0.987158	0.916319	2.44e-08	1.44249	2.14657	1.87e-07
	ONLI_0417	LPC 19:0	CSHPOS	WYIMORDZGCUBAA-AREMUKBSSA-N	24779472	CCCCCCCCCCCCCCCCCCC(=O)OC[C@H](COP(=O)([O-])OCC[N+](C)(C)C)O	20	20	0.260802	0.260802	5.68e-10	1.55387	2.0844	1.21e-08
	ONLI_0418	TAG 54:8; TAG 18:2-18:3-18:3;	CSHPOS	IMPMCCKWZKDAGE-GLLBNYCSSA-N	97161142	CCCCC/C=C\C/C=C\CCCCCCCC(=O)OC[C@@H](COC(=O)CCCCCCC/C=C\C/C=C\C/C=C\CC)OC(=O)CCCCCCC/C=C\C/C=C\C/C=C\CC	20	20	0.887459	0.900527	0.0295106	0.656341	1.8742	0.0561609
	ONLI_0419	TAG 58:11; TAG 18:2-18:3-22:6;	CSHPOS	CCWQXSQVMPACON-RXTLCQEBSA-N	131763405	CCCCC/C=C\C/C=C\CCCCCCCC(=O)OC[C@@H](COC(=O)CC/C=C\C/C=C\C/C=C\C/C=C\C/C=C\C/C=C\CC)OC(=O)CCCCCCC/C=C\C/C=C\C/C=C\CC	20	20	0.947802	0.999413	0.727976	-0.10892	0.989442	0.797307
	ONLI_0420	Lyso-PC o-18	CSHPOS	XKBJVQHMEXMFDZ-AREMUKBSSA-N	2733532	CCCCCCCCCCCCCCCCCCOC[C@H](COP(=O)([O-])OCC[N+](C)(C)C)O	20	20	0.958064	0.984364	0.0500612	0.612621	1.08268	0.0897697
	ONLI_0421	CE ( 24:1)	CSHPOS	PUKCXSHDVCMMAN-FYGHJIOESA-N	53477888	CCCCCCCC/C=C\CCCCCCCCCCCCCC(=O)O[C@H]1CC[C@@]2([C@H]3CC[C@]4([C@H]([C@@H]3CC=C2C1)CC[C@@H]4[C@H](C)CCCC(C)C)C)C	20	20	0.00367589	0.00123308	0.688815	0.111469	1.20417	0.765879
	ONLI_0422	TAG 56:7; TAG 16:0-18:2-22:5;	CSHPOS	RUFOURHRNYZYIN-LCRTUSODSA-N	131755334	CCCCCCCCCCCCCCCC(=O)OC[C@@H](COC(=O)CCCCC/C=C\C/C=C\C/C=C\C/C=C\C/C=C\CC)OC(=O)CCCCCCC/C=C\C/C=C\CCCCC	20	20	0.986187	0.996198	0.337917	0.28896	1.07227	0.459499
	ONLI_0423	TAG 56:5; TAG 18:1-18:2-20:2;	CSHPOS	HLTNSFGECJJVPF-SGFVPPCASA-N	131760192	CCCCCC/C=C\CCCCCCCCCC(=O)OC[C@@H](COC(=O)CCCCCCCCC/C=C\C/C=C\CCCCC)OC(=O)CCCCCCC/C=C\C/C=C\CCCCC	20	20	0.99955	0.990042	9.13e-06	1.18447	2.30133	3.83e-05
	ONLI_0424	TAG 56:9; TAG 16:0-20:4-20:5;	CSHPOS	XOJDXSDPICSSTA-FXRJZKPYSA-N	131755442	CCCCCCCCCCCCCCCC(=O)OC[C@@H](COC(=O)CCC/C=C\C/C=C\C/C=C\C/C=C\C/C=C\CC)OC(=O)CCC/C=C\C/C=C\C/C=C\C/C=C\CCCCC	20	20	0.787936	0.996987	0.000629186	0.992264	1.50218	0.00176479
	ONLI_0425	CE ( 22:5)	CSHPOS	XOLZNHXNFMEUGA-DCDLNIKOSA-N	42608400	CC/C=C\C/C=C\C/C=C\C/C=C\C/C=C\CCCCCC(=O)O[C@H]1CC[C@@]2([C@H]3CC[C@]4([C@H]([C@@H]3CC=C2C1)CC[C@@H]4[C@H](C)CCCC(C)C)C)C	20	20	0.92324	0.996241	0.00707796	0.813042	1.94429	0.0155676
	ONLI_0426	DAG 38:6; DAG 18:2-20:4;	CSHPOS	XQKXAZZSUMABAU-HKOSRXLCSA-N	53478108	CCCCC/C=C\C/C=C\CCCCCCCC(=O)OC[C@H](CO)OC(=O)CCCCCC/C=C\C/C=C\C/C=C\C/C=C\CC	20	20	0.999997	0.952496	9.41e-06	1.25035	1.42932	3.91e-05
	ONLI_0427	LPC 20:3 b	CSHPOS	XUDGAAFUMTTZCO-QNEBEIHSSA-N	138300357	CC/C=C\C/C=C\C/C=C\CCCCCCCCCC(=O)OCC(COP(=O)([O-])OCC[N+](C)(C)C)O	20	20	0.771239	0.707347	0.00408527	0.857573	1.40967	0.00947735
	ONLI_0428	PCo-40:7 A	CSHPOS	XUVCLJCZWPTAIO-OAKHYACESA-N	53479405	CCCCCCCC/C=C\CCCCCC/C=C\OC(COC(=O)CCCCC/C=C\C/C=C\C/C=C\C/C=C\C/C=C\CC)COP(=O)([O-])OCC[N+](C)(C)C	20	20	0.945337	0.230871	1.11e-08	1.46959	1.61046	9.78e-08
	ONLI_0429	PC 36:6; PC 18:3-18:3;	CSHPOS	XXKFQTJOJZELMD-JICBSJGISA-N	24778990	CC/C=C\C/C=C\C/C=C\CCCCCCCC(=O)OC[C@H](COP(=O)([O-])OCC[N+](C)(C)C)OC(=O)CCCCCCC/C=C\C/C=C\C/C=C\CC	20	20	0.894317	0.782265	2.26e-06	1.29242	1.74672	1.09e-05
	ONLI_0430	TAG 58:9; TAG 18:2-18:2-22:5;	CSHPOS	DNOZVMIUNWBFHO-OIANEIKYSA-N	131750598	CCCCC/C=C\C/C=C\CCCCCCCC(=O)OC[C@@H](COC(=O)CCCCC/C=C\C/C=C\C/C=C\C/C=C\C/C=C\CC)OC(=O)CCCCCCC/C=C\C/C=C\CCCCC	20	20	0.802048	0.734409	0.0883493	-0.530491	0.845091	0.150563
	ONLI_0432	CE (20:5)	CSHPOS	XZFUGMCJZFRBKF-JIKDAPOUSA-N	53477889	CC/C=C\C/C=C\C/C=C\C/C=C\C/C=C\CCCC(=O)O[C@H]1CC[C@@]2(C3CC[C@]4(C(C3CC=C2C1)CCC4[C@H](C)CCCC(C)C)C)C	20	20	0.868655	0.570552	0.0167197	0.725524	1.56623	0.0339027
	ONLI_0433	LPC 18:1	CSHPOS	YAMUFBLWGFFICM-PTGWMXDISA-N	16081932	CCCCCCCC/C=C\CCCCCCCC(=O)OC[C@H](COP(=O)([O-])OCC[N+](C)(C)C)O	20	20	0.756803	0.604107	0.00340011	0.874922	1.32422	0.008074
	ONLI_0434	TAG 47:1; TAG 15:0-16:0-16:1;	CSHPOS	RCYIETYFTUBXFK-KWLHUJJFSA-N	131754159	CCCCCCCCCCCCCCCC(=O)O[C@@H](COC(=O)CCCCCCCCCCCCCC)COC(=O)CCCCCCC/C=C\CCCCCC	19	20	0.628615	0.687426	0.00382237	0.833964	2.04611	0.00894218
	ONLI_0435	PE36:2	CSHPOS	ZTSRQLQWGSDQGP-RTJYTIBZSA-N	53479650	CCCCCCCC/C=C\CCCCCCCC(=O)OC[C@H](COP(=O)(O)OCCN)OC(=O)CCCCCCCCC/C=C\CCCCCC	20	20	0.964018	0.530943	2.25e-07	1.37661	2.2697	1.36e-06
	ONLI_0436	DAG 34:1; DAG 16:0-18:1;	CSHPOS	YEJYLHKQOBOSCP-OZKTZCCCSA-N	5282283	CCCCCCCCCCCCCCCC(=O)OC[C@H](CO)OC(=O)CCCCCCC/C=C\CCCCCCCC	20	20	0.99982	0.999968	9.99e-06	1.2234	1.58908	4.12e-05
	ONLI_0437	TAG 54:3; TAG 18:0-18:1-18:2;	CSHPOS	TVLMJMFKNWRCGI-HIAAHSCQSA-N	131755942	CCCCCCCCCCCCCCCCCC(=O)OC[C@@H](COC(=O)CCCCCCC/C=C\C/C=C\CCCCC)OC(=O)CCCCCCCCC/C=C\CCCCCC	20	20	0.610383	0.646202	0.00317255	0.862876	1.87269	0.0076009
	ONLI_0438	TAG 56:5; TAG 18:0-18:1-20:4;	CSHPOS	YGKXJDDGNQKJPT-COCAYHFYSA-N	131755946	CCCCCCCCCCCCCCCCCC(=O)OC[C@@H](COC(=O)CCC/C=C\C/C=C\C/C=C\C/C=C\CCCCC)OC(=O)CCCCCCCCC/C=C\CCCCCC	19	20	0.781127	0.681144	0.341445	0.280359	1.26334	0.462638
	ONLI_0439	PC 16:0/o-20:5	CSHPOS	YHSSHPWVFALMBA-IARQOZKNSA-N	10485310	CCCCCCCCCCCCCCCCOC[C@H](COP(=O)([O-])OCC[N+](C)(C)C)OC(=O)CCC/C=C\C/C=C\C/C=C\C/C=C\C/C=C\CC	20	20	0.369687	0.971843	0.0357209	0.637113	1.14653	0.0668729
	ONLI_0440	SMd34:2	CSHPOS	OAHFTKWSJGVMTG-MBIABJCFSA-N	52931145	CCCCCCCCCCCCC/C=C/[C@H]([C@H](COP(=O)([O-])OCC[N+](C)(C)C)NC(=O)CCCCCCC/C=C\CCCCCC)O	20	20	0.93076	0.735587	4.32e-09	1.47647	1.5181	4.77e-08
	ONLI_0441	AC 8:1	CSHPOS	LOSHAHDSFZXVCT-LXKVQUBZSA-N	70679121	CCCCC/C=C/C(=O)O[C@@H](CC(=O)[O-])C[N+](C)(C)C	19	20	0.936905	0.994433	0.394402	-0.242555	1.01201	0.517934
	ONLI_0442	PCo-38:5 A	CSHPOS	YPAPIRJFGNBODV-AMFPDOHCSA-N	53480715	CCCCCCCCCCCCCCCC/C=C\OCC(COP(=O)([O-])OCC[N+](C)(C)C)OC(=O)CCCCCC/C=C\C/C=C\C/C=C\C/C=C\CC	20	20	0.959803	0.813489	1.84e-07	1.35699	1.38767	1.14e-06
	ONLI_0443	PE 34:0; PE 17:0-17:0;	CSHPOS	YSFFAUPDXKTJMR-DIPNUNPCSA-N	46891875	CCCCCCCCCCCCCCCCC(=O)OC[C@H](COP(=O)(O)OCCN)OC(=O)CCCCCCCCCCCCCCCC	20	20	0.952472	0.975263	0.260997	0.338454	1.0286	0.377882
	ONLI_0445	PC 39:5; PC 19:0-20:5;	CSHPOS	YTUVRFVITPTFSM-ZDQXWTFCSA-N	52922977	CCCCCCCCCCCCCCCCCCC(=O)OC[C@H](COP(=O)([O-])OCC[N+](C)(C)C)OC(=O)CCC/C=C\C/C=C\C/C=C\C/C=C\C/C=C\CC	20	20	0.260802	0.260802	5.14e-10	1.54411	3.20631	1.21e-08
	ONLI_0446	TAG 51:0; TAG 16:0-17:0-18:0;	CSHPOS	YVLSJEQNDDKMQI-UHFFFAOYSA-N	138309104	CCCCCCCCCCCCCCCCCC(=O)OCC(COC(=O)CCCCCCCCCCCCCCC)OC(=O)CCCCCCCCCCCCCCCC	20	20	0.82278	0.135598	0.150331	0.411294	1.4299	0.237753
	ONLI_0447	LPE 16:0	CSHPOS	YVYMBNSKXOXSKW-HXUWFJFHSA-N	9547069	CCCCCCCCCCCCCCCC(=O)OC[C@H](COP(=O)(O)OCCN)O	20	20	0.634304	0.609237	0.0381219	0.622624	1.13417	0.0708732
	ONLI_0448	PC34:4	CSHPOS	YWDDIWXKFJEMKF-JTZVLWBESA-N	52922891	CCCCCCCCCCCCCCCC(=O)O[C@H](COC(=O)CCCC/C=C\C/C=C\C/C=C\C/C=C\CC)COP(=O)([O-])OCC[N+](C)(C)C	20	20	0.968423	0.438272	1.17e-05	1.20099	1.56634	4.78e-05
	ONLI_0449	SMd39:1	CSHPOS	YXSZOBWVQJIWNE-QVDCKBILSA-N	52931193	CCCCCCCCCCCCCCCCCCCCC(=O)N[C@@H](COP(=O)([O-])OCC[N+](C)(C)C)[C@@H](/C=C/CCCCCCCCCCCCC)O	20	20	0.260802	0.260802	5.27e-10	1.54537	2.38787	1.21e-08
	ONLI_0450	LPC 20:2	CSHPOS	YYQVCMMXPIJVHY-ZOIJLGJPSA-N	52924053	CCCCC/C=C\C/C=C\CCCCCCCCCC(=O)OC[C@H](COP(=O)([O-])OCC[N+](C)(C)C)O	20	20	0.999924	0.998168	0.000110077	1.07476	1.36303	0.000357305
	ONLI_0451	LPC 20:1	CSHPOS	YYSFWGQAKJTHRE-MEOKJUQFSA-N	52924051	CCCCCCCC/C=C\CCCCCCCCCC(=O)OC[C@H](COP(=O)([O-])OCC[N+](C)(C)C)O	20	20	0.260802	0.260802	5.07e-10	1.54349	2.37419	1.21e-08
	ONLI_0452	TAG 62:2; TAG 18:2-22:0-22:0;	CSHPOS	VPZZYXWJCZKULK-CUUCRUSKSA-N	9545738	CCCCCCCCCCCCCCCCCCCCCC(=O)OC[C@@H](COC(=O)CCCCCCC/C=C\C/C=C\CCCCC)OC(=O)CCCCCCCCCCCCCCCCCCCCC	19	20	0.226763	0.00285312	0.00797124	0.695395	2.54887	0.0173898
	ONLI_0453	Cer d42:1	CSHPOS	ZJVVOYPTFQEGPH-AUTSUKAISA-N	5283571	CCCCCCCCCCCCCCCCCCCCCCCC(=O)N[C@@H](CO)[C@@H](/C=C/CCCCCCCCCCCCC)O	20	19	0.998613	0.993948	7.73e-05	1.069	1.39138	0.000269953
	ONLI_0454	TAG 50:1; TAG 16:0-16:0-18:1;	CSHPOS	ZKEWGTVAIGJNBK-ZMSSUMMHSA-N	131750533	CCCCCCCCCCCCCCCC(=O)OC[C@@H](COC(=O)CCCCCCCCC/C=C\CCCCCC)OC(=O)CCCCCCCCCCCCCCC	20	20	0.882036	0.768111	0.00633931	0.810563	1.96081	0.0140583
	ONLI_0455	TAG 52:6; TAG 16:1-18:2-18:3;	CSHPOS	NOOJQDXMGLPOOA-UJLFLSCOSA-N	131759571	CCCCCC/C=C\CCCCCCCC(=O)OC[C@@H](COC(=O)CCCCCCC/C=C\C/C=C\C/C=C\CC)OC(=O)CCCCCCC/C=C\C/C=C\CCCCC	20	20	0.999997	0.996125	9.33e-06	1.2317	2.10783	3.89e-05
	ONLI_0456	TAG 44:0; TAG 12:0-14:0-18:0;	CSHPOS	ZPXAKNNNRATWOJ-UHFFFAOYSA-N	138315726	CCCCCCCCCCCCCCCCCC(=O)OCC(COC(=O)CCCCCCCCCCC)OC(=O)CCCCCCCCCCCCC	19	20	0.498791	0.885179	0.161239	0.408966	1.30023	0.249611
	ONLI_0457	PEo-38:5	CSHPOS	ZTZQZGHJLWFLFQ-VZBWJDOASA-N	53480855	CCCCCCCCCCCCCCCC/C=C\OC[C@H](COP(=O)(O)OCCN)OC(=O)CCCCCC/C=C\C/C=C\C/C=C\C/C=C\CC	19	20	0.7202	0.794589	0.172764	-0.410078	0.916609	0.265918
	ONLI_0458	TAG 60:11; TAG 18:2-20:4-22:5;	CSHPOS	CJMQGODMMNFMOQ-ORXARHRGSA-N	131763346	CCCCC/C=C\C/C=C\CCCCCCCC(=O)OC[C@@H](COC(=O)CCCCC/C=C\C/C=C\C/C=C\C/C=C\C/C=C\CC)OC(=O)CCC/C=C\C/C=C\C/C=C\C/C=C\CCCCC	20	20	0.887578	0.979389	0.00345179	-0.85343	0.800746	0.00817262
	ONLI_0471	FA 11:0	CSHNEG	ZDPHROOEEOARMN-UHFFFAOYSA-N	8180	CCCCCCCCCCC(=O)O	20	20	0.968832	0.971842	0.612968	-0.15963	0.909517	0.707948
	ONLI_0473	FA 13:0	CSHNEG	SZHOJFHSIKHZHA-UHFFFAOYSA-N	12530	CCCCCCCCCCCCC(=O)O	20	20	0.998063	0.985809	0.590488	-0.163864	0.930238	0.693931
	ONLI_0474	FA 14:1	CSHNEG	AFGUVBVUFZMJMX-KTKRTIGZSA-N	5312400	CCCCCCCC/C=C\CCCC(=O)O	20	20	0.995377	0.99979	0.821119	0.0725397	1.0255	0.873184
	ONLI_0475	FA 15:1	CSHNEG	DJCQJZKZUCHHAL-VOTSOKGWSA-N	6365140	CCCCC/C=C/CCCCCCCC(=O)O	20	20	0.630247	0.982266	0.501851	0.214978	0.937479	0.614902
	ONLI_0476	FA 15:0	CSHNEG	WQEPLUUGTLDZJY-UHFFFAOYSA-N	13849	CCCCCCCCCCCCCCC(=O)O	20	20	0.999474	0.999538	0.891469	0.0435566	0.984065	0.922407
	ONLI_0477	FA 16:1	CSHNEG	SECPZKHBENQXJG-FPLPWBNLSA-N	445638	CCCCCC/C=C\CCCCCCCC(=O)O	20	20	0.992058	0.921147	0.0773254	0.551218	1.36941	0.133577
	ONLI_0478	FA 17:0	CSHNEG	KEMQGTRYUADPNZ-UHFFFAOYSA-N	10465	CCCCCCCCCCCCCCCCC(=O)O	19	20	0.820121	0.989165	0.0263791	0.612784	1.14026	0.0510462
	ONLI_0479	FA 18:3	CSHNEG	DTOSIQBPPRVQHS-PDBXOOCHSA-N	5280934	CC/C=C\C/C=C\C/C=C\CCCCCCCC(=O)O	20	20	0.822878	0.920322	0.306206	0.321839	1.06484	0.426464
	ONLI_0480	FA 18:2	CSHNEG	JBYXPOFIGCOSSB-GOJKSUSPSA-N	5280644	CCCCCC/C=C/C=C\CCCCCCCC(=O)O	20	20	0.683728	0.979124	0.777778	-0.0893527	0.941727	0.836548
	ONLI_0481	FA 18:1	CSHNEG	ZQPPMHVWECSIRJ-KTKRTIGZSA-N	445639	CCCCCCCC/C=C\CCCCCCCC(=O)O	20	20	0.999654	0.999927	0.645597	-0.146379	0.930252	0.733012
	ONLI_0483	FA 20:5	CSHNEG	JAZBEHYOTPTENJ-JLNKQSITSA-N	446284	CC/C=C\C/C=C\C/C=C\C/C=C\C/C=C\CCCC(=O)O	20	20	0.97685	0.912637	0.480086	-0.225967	0.859255	0.592744
	ONLI_0484	FA 20:4	CSHNEG	YZXBAPSDXZZRGB-DOFZRALJSA-N	444899	CCCCC/C=C\C/C=C\C/C=C\C/C=C\CCCC(=O)O	20	20	0.993181	0.999848	0.00141893	-0.938468	0.730782	0.00362771
	ONLI_0485	FA 20:3 a	CSHNEG	UNSRRHDPHVZAHH-YOILPLPUSA-N	5312531	CCCCCCCC/C=C\C/C=C\C/C=C\CCCC(=O)O	20	20	0.489009	0.744129	0.996023	-0.00159499	0.956932	0.997261
	ONLI_0486	FA 20:3 b	CSHNEG	HOBAELRKJCKHQD-QNEBEIHSSA-N	5280581	CCCCC/C=C\C/C=C\C/C=C\CCCCCCC(=O)O	20	20	0.980785	0.996966	0.364444	0.286711	1.09264	0.486529
	ONLI_0487	FA 20:2	CSHNEG	XSXIVVZCUAHUJO-HZJYTTRNSA-N	6439848	CCCCC/C=C\C/C=C\CCCCCCCCCC(=O)O	20	20	0.995556	0.996548	0.129743	0.474869	1.17488	0.210997
	ONLI_0488	FA 20:1	CSHNEG	BITHHVVYSMSWAG-KTKRTIGZSA-N	5282768	CCCCCCCC/C=C\CCCCCCCCCC(=O)O	20	20	0.997626	0.923208	1.31e-06	1.33368	2.1026	6.66e-06
	ONLI_0489	FA 20:0	CSHNEG	VKOBVWXKNCXXDE-UHFFFAOYSA-N	10467	CCCCCCCCCCCCCCCCCCCC(=O)O	20	20	0.703377	0.999917	4.78e-06	1.27999	1.7012	2.2e-05
	ONLI_0491	FA 22:6	CSHNEG	MBMBGCFOFBJSGT-KUBAVDMBSA-N	445580	CC/C=C\C/C=C\C/C=C\C/C=C\C/C=C\C/C=C\CCC(=O)O	20	20	0.983167	0.609511	0.0519209	-0.60844	0.744479	0.0922657
	ONLI_0492	FA 22:2	CSHNEG	HVGRZDASOHMCSK-HZJYTTRNSA-N	5312554	CCCCC/C=C\C/C=C\CCCCCCCCCCCC(=O)O	20	20	0.681976	0.559054	1.35e-09	1.54426	2.88211	2.17e-08
	ONLI_0493	FA 22:1	CSHNEG	DPUOLQHDNGRHBS-KTKRTIGZSA-N	5281116	CCCCCCCC/C=C\CCCCCCCCCCCC(=O)O	20	20	0.922427	0.993349	2.35e-06	1.28408	1.52598	1.13e-05
	ONLI_0494	FA 22:0	CSHNEG	UKMSUNONTOPOIO-UHFFFAOYSA-N	8215	CCCCCCCCCCCCCCCCCCCCCC(=O)O	20	20	0.948928	0.999866	0.000530537	1.0251	1.37351	0.00151987
	ONLI_0495	FA 24:1	CSHNEG	GWHCXVQVJPWHRF-KTKRTIGZSA-N	5281120	CCCCCCCC/C=C\CCCCCCCCCCCCCC(=O)O	20	20	0.257073	0.820827	0.000352937	1.05217	1.45336	0.00104839
	ONLI_0496	FA 24:0	CSHNEG	QZZGJDVWLFXDLK-UHFFFAOYSA-N	11197	CCCCCCCCCCCCCCCCCCCCCCCC(=O)O	19	20	0.74246	0.948138	0.971333	0.0110877	1.01897	0.981083
	ONLI_0497	FAHFA 24:0; FAHFA 16:0/8:0;	CSHNEG	JFADBWKNFGCNQI-UHFFFAOYSA-N	138184454	CCCCCCCCCCCCCCCC(=O)OC(CCC)CCCC(=O)O	20	19	0.979821	0.76873	0.777791	-0.0866946	0.941643	0.836548
	ONLI_0498	LPE P-16:0	CSHNEG	QYTPGOPLNFESQC-NUTQULCTSA-N	42607469	CCCCCCCCCCCCCC/C=C\OC[C@H](COP(=O)(O)OCCN)O	20	20	0.966876	0.969946	0.00067311	0.995327	1.24963	0.00184933
	ONLI_0503	LPE 20:4	CSHNEG	JPNPIRVRGLGTRE-YSKCIPFOSA-N	53480952	CC/C=C\C/C=C\C/C=C\C/C=C\CCCCCCC(=O)OC[C@H](COP(=O)(O)OCCN)O	20	20	0.988649	0.982585	0.786616	-0.0855598	0.959544	0.843177
	ONLI_0504	LPE 22:6	CSHNEG	XEVRBOQZSXWGQO-PAUXXPOVSA-N	52925132	CC/C=C\C/C=C\C/C=C\C/C=C\C/C=C\C/C=C\CCC(=O)OC[C@H](COP(=O)(O)OCCN)O	20	20	0.823782	0.671118	0.265729	0.345349	1.17952	0.383355
	ONLI_0505	LPE 22:5	CSHNEG	OSRWIBSZJTWIKA-SCFYABBUSA-N	53480955	CC/C=C\C/C=C\C/C=C\C/C=C\C/C=C\CCCCCC(=O)OC[C@H](COP(=O)(O)OCCN)O	19	19	0.999807	0.951674	1.28e-05	1.17375	2.12554	5.22e-05
	ONLI_0509	LPC 16:0	CSHNEG	ASWBNKHCZGQVJV-HSZRJFAPSA-N	460602	CCCCCCCCCCCCCCCC(=O)OC[C@H](COP(=O)([O-])OCC[N+](C)(C)C)O	20	20	0.997369	0.999957	0.000452271	0.983101	1.17728	0.00131912
	ONLI_0511	LPC 18:1	CSHNEG	PZRFVAHZNWPPAC-VBKSFVIKSA-N	53480465	CCCCCC/C=C\CCCCCCCCCC(=O)OC[C@H](COP(=O)([O-])OCC[N+](C)(C)C)O	20	20	0.982549	0.979325	0.0929163	0.5234	1.32843	0.15648
	ONLI_0512	LPC 17:0	CSHNEG	SRRQPVVYXBTRQK-XMMPIXPASA-N	24779463	CCCCCCCCCCCCCCCCC(=O)OC[C@H](COP(=O)([O-])OCC[N+](C)(C)C)O	20	20	0.999191	0.99033	0.16831	0.393111	1.03722	0.259558
	ONLI_0513	LPC 18:3	CSHNEG	WKQNRCYKYCKESD-YVHLTTHBSA-O	5313992	CC/C=C\C/C=C\C/C=C\CCCCCCCC(=O)OC[C@H](COP(=O)(O)OCC[N+](C)(C)C)O	19	19	0.941571	0.997302	5.75e-05	1.09276	1.29673	0.000205705
	ONLI_0516	LPC 18:0	CSHNEG	IHNKQIMGVNPMTC-RUZDIDTESA-N	497299	CCCCCCCCCCCCCCCCCC(=O)OC[C@H](COP(=O)([O-])OCC[N+](C)(C)C)O	20	20	0.891396	0.944878	0.00732154	-0.806261	0.891609	0.0160159
	ONLI_0518	LPI 18:2	CSHNEG	SAHCQBPGXQFTRA-FPKLTXOWSA-N	52928605	CCCCC/C=C\C/C=C\CCCCCCCC(=O)OC[C@H](COP(=O)(O)OC1C([C@@H](C(C(C1O)O)O)O)O)O	20	20	0.996133	0.995582	0.326476	-0.312152	0.887782	0.446962
	ONLI_0521	LPI 18:0	CSHNEG	MXAFDFDAIFZFET-DRPMWXDOSA-N	42607495	CCCCCCCCCCCCCCCCCC(=O)OC[C@H](COP(=O)(O)OC1C([C@@H](C(C(C1O)O)O)O)O)O	20	20	0.96982	0.842495	0.542851	0.194957	1.15703	0.651259
	ONLI_0522	LPC 20:5	CSHNEG	PDIGSOAOQOXRDU-WJPZTBRDSA-N	11757087	CC/C=C\C/C=C\C/C=C\C/C=C\C/C=C\CCCC(=O)OC[C@H](COP(=O)([O-])OCC[N+](C)(C)C)O	20	20	0.997999	0.988877	0.389769	-0.267014	0.952029	0.512686
	ONLI_0524	LPC 20:3 a	CSHNEG	BBNHCUBQEQJHIG-FZZJNMCHSA-N	52924055	CCCCC/C=C\C/C=C\C/C=C\CCCCCCC(=O)OC[C@H](COP(=O)([O-])OCC[N+](C)(C)C)O	20	20	0.779352	0.796785	0.00278019	0.890313	1.46815	0.00672089
	ONLI_0529	LPI 20:4	CSHNEG	LXUGKKVCSTYZFK-YPTWYXPQSA-N	42607497	CCCCC/C=C\C/C=C\C/C=C\C/C=C\CCCC(=O)OC[C@H](COP(=O)(O)OC1C([C@@H](C(C(C1O)O)O)O)O)O	20	20	0.999891	0.999804	0.00140487	-0.957985	0.660574	0.00361317
	ONLI_0530	Cer-NS d36:1; Cer-NS d18:1/18:0;	CSHNEG	VODZWWMEJITOND-NXCSZAMKSA-N	5283565	CCCCCCCCCCCCCCCCCC(=O)N[C@@H](CO)[C@@H](/C=C/CCCCCCCCCCCCC)O	19	20	0.382503	0.737179	4.61e-09	-1.50157	0.476959	4.95e-08
	ONLI_0531	LPC 22:5 a	CSHNEG	YBUXFQUGNPBZPS-YNBHEIDWSA-N	53480473	CCCCC/C=C\C/C=C\C/C=C\C/C=C\C/C=C\CCC(=O)OC[C@H](COP(=O)([O-])OCC[N+](C)(C)C)O	19	19	0.92972	0.990494	0.000173268	1.03356	1.58679	0.000538535
	ONLI_0535	Cer (d18:1(4E)/22:0)	CSHNEG	KEPQASGDXIEOIL-GLQCRSEXSA-N	5283567	CCCCCCCCCCCCCCCCCCCCCC(=O)N[C@@H](CO)[C@@H](/C=C/CCCCCCCCCCCCC)O	20	20	0.260802	0.260802	2.27e-10	1.52514	3.73135	1.21e-08
	ONLI_0536	Cer-NS d40:2; Cer-NS d18:2/22:0;	CSHNEG	FNIDWIWVIDQZRV-FDPIOYFLSA-N	52931120	CCCCCCCCCCCCCCCCCCCC(=O)N[C@@H](CO)[C@@H](/C=C/CCCCCCCC/C=C\CCC)O	20	20	0.260802	0.178546	3.18e-10	1.53132	6.52949	1.21e-08
	ONLI_0537	Cer (d18:1(4E)/23:0)	CSHNEG	NAJHAHQNQCNWOP-PUYNVXOJSA-N	52931115	CCCCCCCCCCCCCCCCCCCCCCC(=O)N[C@@H](CO)[C@@H](/C=C/CCCCCCCCCCCCC)O	20	20	0.753738	0.963724	0.805048	0.0754246	1.03982	0.8595
	ONLI_0538	Cer-NS d41:2; Cer-NS d18:2/23:0;	CSHNEG	ZMECGTOWDUDJOX-YOFLLLADSA-N	52931124	CCCCCCCCCCCCCCCCCCCCCCC(=O)N[C@@H](CO)[C@@H](/C=C/CCCCCCCC/C=C\CCC)O	20	20	0.999999	0.980518	2.05e-07	1.36298	2.06043	1.25e-06
	ONLI_0539	PC 25:0; PC 12:0-13:0;	CSHNEG	FCTBVSCBBWKZML-WJOKGBTCSA-N	24778516	CCCCCCCCCCCCC(=O)O[C@H](COC(=O)CCCCCCCCCCC)COP(=O)([O-])OCC[N+](C)(C)C	20	20	0.948871	0.922445	0.0532582	0.542062	1.06304	0.0940194
	ONLI_0541	Cer-NDS d41:0; Cer-NDS d18:0/23:0;	CSHNEG	FTSDYFFYZJTACJ-IOLBBIBUSA-N	53481049	CCCCCCCCCCCCCCCCCCCCCCC(=O)N[C@@H](CO)[C@@H](CCCCCCCCCCCCCCC)O	20	20	0.997448	0.964024	0.583166	0.174155	1.13592	0.687334
	ONLI_0542	Cer-NP t40:0; Cer-NP t18:0/22:0;	CSHNEG	CIMNZQFRNXDRER-HIERITDVSA-N	5322153	CCCCCCCCCCCCCCCCCCCCCC(=O)N[C@@H](CO)[C@@H]([C@@H](CCCCCCCCCCCCCC)O)O	20	20	0.866942	0.418701	0.00155746	0.927096	1.47075	0.00395505
	ONLI_0543	Cer-NS d42:3; Cer-NS d18:2/24:1;	CSHNEG	0	NA	0	20	20	0.990201	0.975344	0.00162785	0.908102	1.34129	0.00412081
	ONLI_0545	Cer-NS d42:2; Cer-NS d18:1/24:1;	CSHNEG	VJSBNBBOSZJDKB-KPEYJIHVSA-N	5283568	CCCCCCCCCCCCC/C=C/[C@H]([C@H](CO)NC(=O)CCCCCCCCCCCCC/C=C\CCCCCCCC)O	20	20	0.993613	0.999868	0.000239851	1.04581	1.4083	0.000720448
	ONLI_0546	PE 34:3; PE 16:0-18:3;	CSHNEG	QONZHKTZKTUIMU-WSQRTPJYSA-N	9546746	CCCCCCCCCCCCCCCC(=O)OC[C@H](COP(=O)(O)OCCN)OC(=O)CCCCCCC/C=C\C/C=C\C/C=C\CC	20	20	0.978639	0.734645	7.94e-09	1.48868	4.22949	7.33e-08
	ONLI_0547	PE 34:1; PE 16:0-18:1;	CSHNEG	FHQVHHIBKUMWTI-OTMQOFQLSA-N	5283496	CCCCCCCCCCCCCCCC(=O)OC[C@H](COP(=O)(O)OCCN)OC(=O)CCCCCCC/C=C\CCCCCCCC	20	20	0.850988	0.731126	3.45e-09	1.51762	2.84677	3.91e-08
	ONLI_0548	PE 36:6e; PE 16:1e/20:5;	CSHNEG	LEBOQMHVVYOZDX-AFHBIVKPSA-N	52924236	CCCCCC/C=C\CCCCCCCC(=O)OC[C@H](COP(=O)(O)OCCN)OC(=O)CCC/C=C\C/C=C\C/C=C\C/C=C\C/C=C\CC	20	20	0.999999	0.700798	8.02e-06	1.23643	2.27229	3.41e-05
	ONLI_0549	Cer-NS d43:1; Cer-NS d19:1/24:0;	CSHNEG	KSYIVRBEJSMJMX-PVNBSDFKSA-N	134745021	CCCCCCCCCCCCCCCCCCCCCCCC(=O)N[C@@H](CO)[C@@H](/C=C/CCCCCCCCCCCCCC)O	20	20	0.982397	0.959077	0.00332808	-0.889378	0.67103	0.00792635
	ONLI_0550	PE 36:4e; PE 18:2e/18:2;	CSHNEG	0	NA	0	20	20	0.994458	0.993	5.26e-05	1.15647	1.67425	0.000189095
	ONLI_0551	Cer-NP t42:0; Cer-NP t18:0/24:0;	CSHNEG	ZESJDNWGTANZCC-UHYFRKBVSA-N	129678169	[2H]CCCCCCCCCCCCCCCCCCCCCCCC(=O)N[C@@H](CO)[C@@H]([C@@H](CCCCCCCCCCCCCC)O)O	20	20	0.965339	0.916504	0.0145946	0.721194	1.31118	0.0299711
	ONLI_0552	PE 36:2e; PE 18:1e/18:1;	CSHNEG	GHNXVMPBTBKJRP-CLFAGFIQSA-N	138160177	CCCCCCCC/C=C\CCCCCCCCOCC(COP(=O)(O)OCCN)OC(=O)CCCCCCC/C=C\CCCCCCCC	19	19	0.999485	0.98862	9.98e-07	1.29535	1.3747	5.29e-06
	ONLI_0554	HexCer-AP t34:0; HexCer-AP t18:0/16:0;	CSHNEG	RHIXBFQKTNYVCX-KHDKDNTOSA-N	70678878	CCCCCCCCCCCCCC[C@H]([C@H]([C@H](CO)NC(=O)C(CCCCCCCCCCCCCC)O)O)O	20	19	0.645724	0.971522	0.001869	0.840414	1.24099	0.0047017
	ONLI_0555	SM d32:1; SM d16:1/16:0;	CSHNEG	RPTUKVYGSPDHGQ-PSALXKTOSA-N	52931133	CCCCCCCCCCCCCCCC(=O)N[C@@H](COP(=O)([O-])OCC[N+](C)(C)C)[C@@H](/C=C/CCCCCCCCCCC)O	20	19	0.999994	0.709133	3.57e-07	-1.35851	0.765991	2.11e-06
	ONLI_0556	PE 36:4; PE 16:0-20:4;	CSHNEG	NQIMLWFRWGTTOZ-JGGKAAGMSA-N	53479588	CCCCCCCCCCCCCCCC(=O)OC[C@H](COP(=O)(O)OCCN)OC(=O)CCCCCC/C=C\C/C=C\C/C=C\C/C=C\CC	20	20	0.99999	0.615112	8.12e-08	1.40781	3.59888	5.44e-07
	ONLI_0557	PE 36:3	CSHNEG	DOILLFCKSSPXMF-ZKZIFNJMSA-N	52924364	CCCCCCCC/C=C\CCCCCCCC(=O)O[C@H](COC(=O)CCCCCCC/C=C\C/C=C\CCCCC)COP(=O)(O)OCCN	20	20	0.895848	0.3676	2.16e-09	1.497	3.0215	2.9e-08
	ONLI_0559	PE 36:2; PE 18:0-18:2;	CSHNEG	YDTWOEYVDRKKCR-KNERPIHHSA-N	9546749	CCCCCCCCCCCCCCCCCC(=O)OC[C@H](COP(=O)(O)OCCN)OC(=O)CCCCCCC/C=C\C/C=C\CCCCC	20	20	0.963914	0.437286	4.95e-07	1.34914	2.20115	2.83e-06
	ONLI_0560	PE 36:1; PE 18:0-18:1;	CSHNEG	JQKOHRZNEOQNJE-DJEJVYNPSA-N	9546742	CCCCCCCCCCCCCCCCCC(=O)OC[C@H](COP(=O)(O)OCCN)OC(=O)CCCCCCC/C=C\CCCCCCCC	20	20	0.997862	0.733654	1.18e-06	1.31112	2.08454	6.04e-06
	ONLI_0562	PE 38:7e; PE 16:1e/22:6; [M-H]-	CSHNEG	WVGALBKSWOUIEZ-XNHMFJFDSA-N	5283497	CCCCCCCCCCCCCC/C=C\OC[C@H](COP(=O)(O)OCCN)OC(=O)CC/C=C\C/C=C\C/C=C\C/C=C\C/C=C\C/C=C\CC	20	20	0.999965	0.510476	3.55e-08	1.3976	1.68843	2.58e-07
	ONLI_0563	SM d33:1; SM d17:1/16:0;	CSHNEG	CGMZWBZSOINWHL-YPDYIYJKSA-N	52931137	CCCCCCCCCCCCCCCCC(=O)N[C@@H](COP(=O)([O-])OCC[N+](C)(C)C)[C@@H](/C=C/CCCCCCCCCCC)O	20	20	0.999999	0.915154	5.68e-07	-1.36411	0.773855	3.22e-06
	ONLI_0564	PE 38:6e; PE 18:1e/20:5;	CSHNEG	WHKDVYYCCUAIBY-QSOAFSPRSA-N	138287875	CCCCCCCC/C=C\CCCCCCCCOCC(COP(=O)(O)OCCN)OC(=O)CCC/C=C\C/C=C\C/C=C\C/C=C\C/C=C\CC	20	20	0.998724	0.998938	5.12e-05	1.16292	1.34865	0.000184659
	ONLI_0565	PE 38:6e; PE 18:2e/20:4;	CSHNEG	QGMRGDWLZOYPFY-YUPWHRRNSA-N	138243517	CCCCC/C=C\C/C=C\CCCCCCCCOCC(COP(=O)(O)OCCN)OC(=O)CCCCCC/C=C\C/C=C\C/C=C\C/C=C\CC	20	20	0.960755	0.540057	3.26e-09	1.48144	2.07295	3.86e-08
	ONLI_0566	PC 30:0; PC 14:0-16:0;	CSHNEG	RFVFQQWKPSOBED-PSXMRANNSA-N	129657	CCCCCCCCCCCCCCCC(=O)O[C@H](COC(=O)CCCCCCCCCCCCC)COP(=O)([O-])OCC[N+](C)(C)C	20	19	0.998349	0.71037	4.14e-06	-1.23013	0.544553	1.94e-05
	ONLI_0567	PE 38:4e; PE 18:0e/20:4;	CSHNEG	LRBBGQHIVCMVRY-PQNGYSQDSA-N	52925027	CCCCCCCCCCCCCCCCCCOC[C@H](COP(=O)(O)OCCN)OC(=O)CCC/C=C\C/C=C\C/C=C\C/C=C\CCCCC	20	20	0.893324	0.70271	0.333743	0.29588	1.08561	0.455361
	ONLI_0568	HexCer-NS d34:1; HexCer-NS d18:1/16:0;	CSHNEG	VJLLLMIZEJJZTE-JRIZINFMSA-N	134853938	CCCCCCCCCCCCCCCC(=O)N[C@@H](CO[C@H]1C(C([C@H](C(O1)CO)O)O)O)[C@@H](/C=C/CCCCCCCCCCCCC)O	20	20	0.839982	0.975446	6.29e-09	-1.50676	0.479012	6.1e-08
	ONLI_0569	SM d34:2; SM d18:2/16:0;	CSHNEG	YLWSJLLZUHSIEA-CKSUKHGVSA-N	52931235	CCCCCCCCCCCCCCCC(=O)N[C@@H](COP(=O)([O-])OCC[N+](C)(C)C)[C@@H](/C=C/CCCCCCCC/C=C\CCC)O	20	20	0.5877	0.731334	2.52e-09	1.50405	1.52821	3.27e-08
	ONLI_0570	SM d34:1	CSHNEG	RWKUXQNLWDTSLO-GWQJGLRPSA-N	9939941	CCCCCCCCCCCCCCCC(=O)N[C@@H](COP(=O)([O-])OCC[N+](C)(C)C)[C@@H](/C=C/CCCCCCCCCCCCC)O	20	20	0.922017	0.499198	8.62e-07	-1.33787	0.81755	4.66e-06
	ONLI_0571	PE 38:6; PE 16:0-22:6;	CSHNEG	MPWUZHVZZKSTPV-MADBQMNMSA-N	9546799	CCCCCCCCCCCCCCCC(=O)OC[C@H](COP(=O)(O)OCCN)OC(=O)CC/C=C\C/C=C\C/C=C\C/C=C\C/C=C\C/C=C\CC	20	20	0.371751	0.371751	5.72e-10	1.53128	2.54535	1.21e-08
	ONLI_0572	PE 38:5; PE 18:1-20:4;	CSHNEG	ZYMZKMQPPJPQHY-COHGUQLJSA-N	53479651	CCCCCCCC/C=C\CCCCCCCC(=O)OC[C@H](COP(=O)(O)OCCN)OC(=O)CCCCCC/C=C\C/C=C\C/C=C\C/C=C\CC	20	20	0.919061	0.271175	1.89e-08	1.4327	2.77892	1.5e-07
	ONLI_0573	PE18:1e/18-HETE	CSHNEG	ANCAYQLYUYMKFT-GZPCIZTNSA-N	134718784	CCCCCCCCCCCCCCCC/C=C\OCC(COP(=O)(O)OCCN)OC(=O)CCC/C=C\C/C=C\C/C=C\C/C=C\CCC(CC)O	20	20	0.890026	0.879161	5.01e-05	1.16821	1.55746	0.000181804
	ONLI_0574	PE 38:4; PE 18:0-20:4;	CSHNEG	YEHAZLUVAZKVRO-PDWSRYNESA-N	53479610	CCCCCCCCCCCCCCCCCC(=O)OC[C@H](COP(=O)(O)OCCN)OC(=O)CCCCCC/C=C\C/C=C\C/C=C\C/C=C\CC	20	20	0.861008	0.947226	1.55e-08	1.47067	1.86328	1.3e-07
	ONLI_0575	PE 40:8e; PE 18:2e/22:6;	CSHNEG	VVEHXBSUSFPSAC-OJMLKDQNSA-N	138283942	CCCCC/C=C\C/C=C\CCCCCCCCOCC(COP(=O)(O)OCCN)OC(=O)CC/C=C\C/C=C\C/C=C\C/C=C\C/C=C\C/C=C\CC	20	20	0.999994	0.833869	5.55e-06	1.21158	1.58513	2.5e-05
	ONLI_0576	SM d35:1; SM d18:1/17:0;	CSHNEG	YMQZQHIESOAPQH-JXGHDCMNSA-N	46891763	CCCCCCCCCCCCCCCCC(=O)N[C@@H](COP(=O)([O-])OCC[N+](C)(C)C)[C@@H](/C=C/CCCCCCCCCCCCC)O	20	20	1	0.947474	3.42e-06	-1.29417	0.823302	1.62e-05
	ONLI_0577	PE 40:6e; PE 18:0e/22:6;	CSHNEG	CFLIAMAPAOTPGM-AOXDHDBISA-N	52923729	CCCCCCCCCCCCCCCCCCOC[C@H](COP(=O)(O)OCCN)OC(=O)CC/C=C\C/C=C\C/C=C\C/C=C\C/C=C\C/C=C\CC	20	20	0.991727	0.999954	0.212105	0.380358	1.07487	0.318553
	ONLI_0578	PC 32:1e; PC 16:1e/16:0;	CSHNEG	BXQUYBIIGCTQFV-MGIDVFSBSA-O	6913608	CCCCCCCCCCCCCCCC(=O)O[C@H](COCCCCCCCC/C=C\CCCCCC)COP(=O)(O)OCC[N+](C)(C)C	20	20	0.747115	0.973251	0.998455	0.000610086	0.978204	0.998455
	ONLI_0579	PG 36:0; PG 17:0-19:0;	CSHNEG	VRXBINAFDUHENA-IOLBBIBUSA-N	52926502	CCCCCCCCCCCCCCCCCCC(=O)O[C@H](COC(=O)CCCCCCCCCCCCCCCC)COP(=O)(O)OC[C@H](CO)O	20	20	0.887352	0.992438	0.438827	0.244638	1.04856	0.554387
	ONLI_0580	PE 40:5e; PE 18:0e/22:5;	CSHNEG	QIJJGYHBXLEBJV-MVCMTJSTSA-N	53480858	CCCCCCCCCCCCCCCC/C=C\OC[C@H](COP(=O)(O)OCCN)OC(=O)CCCCC/C=C\C/C=C\C/C=C\C/C=C\C/C=C\CC	20	20	1	0.807185	1.47e-07	1.40478	1.77136	9.38e-07
	ONLI_0581	PC 32:0e; PC 16:0e/16:0;	CSHNEG	PEWXKAOBUSBJLD-MCBGMKGZSA-N	11146967	CCCCCCCCCCCCCCCC(=O)O[C@H](CO/C=C\CCCCCCCCCCCCCC)COP(=O)([O-])OCC[N+](C)(C)C	20	20	0.956609	0.99916	6.11e-07	1.35215	1.26242	3.42e-06
	ONLI_0582	HexCer-NS d36:1; HexCer-NS d18:1/18:0;	CSHNEG	YMYQEDCYNANIPI-FKFSGHLWSA-N	135039461	CCCCCCCCCCCCCCCCCC(=O)N[C@@H](CO[C@@H]1C(C([C@@H](C(O1)CO)O)O)O)[C@@H](/C=C/CCCCCCCCCCCCC)O	20	19	1.01e-06	0.260802	6e-12	-1.52424	0.0816413	4.83e-09
	ONLI_0583	SM d36:2	CSHNEG	NELGJAUZKNHZLS-NUIAMLAYSA-N	52931161	CCCCCCCCCCCCCCCCCC(=O)N[C@@H](COP(=O)([O-])OCC[N+](C)(C)C)[C@@H](/C=C/CCCCCCCC/C=C\CCC)O	20	20	0.928135	0.547638	4.91e-09	-1.51202	0.475786	5.07e-08
	ONLI_0584	PE 40:7; PE 18:1-22:6;	CSHNEG	JZSZAGWWWKKXLO-RMEBTJIYSA-N	52922113	CCCCCCCC/C=C\CCCCCCCC(=O)OC[C@H](COP(=O)(O)OCCN)OC(=O)CC/C=C\C/C=C\C/C=C\C/C=C\C/C=C\C/C=C\CC	20	20	0.260802	0.260802	4.13e-10	1.53659	2.41778	1.21e-08
	ONLI_0585	PC 32:2; PC 14:0-18:2;	CSHNEG	IWXJKHSPEQSQMD-GMGFYYQASA-N	24778624	CCCCCCCCCCCCCC(=O)OC[C@H](COP(=O)([O-])OCC[N+](C)(C)C)OC(=O)CCCCCCC/C=C\C/C=C\CCCCC	20	20	0.832912	0.392136	2.2e-09	1.51809	1.77232	2.9e-08
	ONLI_0586	PE 40:6; PE 18:0-22:6;	CSHNEG	XYYHNDVKALDFHQ-OXHZBIAZSA-N	9546798	CCCCCCCCCCCCCCCCCC(=O)OC[C@H](COP(=O)(O)OCCN)OC(=O)CC/C=C\C/C=C\C/C=C\C/C=C\C/C=C\C/C=C\CC	20	20	0.750757	0.850892	4.42e-09	1.49423	1.95791	4.81e-08
	ONLI_0588	PE 40:5; PE 18:0-22:5;	CSHNEG	DPRXQVIZBLENFV-NPQRSGSQSA-N	53479611	CCCCCCCCCCCCCCCCCC(=O)OC[C@H](COP(=O)(O)OCCN)OC(=O)CC/C=C\C/C=C\C/C=C\C/C=C\C/C=C\CCCCC	20	20	0.260802	0.260802	4.21e-10	1.53711	4.10972	1.21e-08
	ONLI_0589	PC 34:3e; PC 16:1e/18:2;	CSHNEG	AXCLECQLCBWNLZ-KZZBVOOISA-N	53481709	CCCCCC/C=C\CCCCCCCCOC[C@H](COP(=O)([O-])OCC[N+](C)(C)C)OC(=O)CCCCCCC/C=C\C/C=C\CCCCC	20	20	0.99909	0.962993	1.94e-05	1.18256	1.46838	7.62e-05
	ONLI_0590	PC 33:2; PC 15:0-18:2;	CSHNEG	DGBYUHHIADYUMU-UESLNCBNSA-N	24778664	CCCCCCCCCCCCCCC(=O)OC[C@H](COP(=O)([O-])OCC[N+](C)(C)C)OC(=O)CCCCCCC/C=C\C/C=C\CCCCC	20	20	0.260802	0.260802	5.54e-10	1.54895	1.80729	1.21e-08
	ONLI_0592	PC 34:2e; PC 16:1e/18:1;	CSHNEG	WDQJCKHLEYAETE-MGXYOJEMSA-N	138286710	CCCCCCCC/C=C\CCCCCCCC(=O)OC(COCCCCCCCC/C=C\CCCCCC)COP(=O)([O-])OCC[N+](C)(C)C	20	20	0.856027	0.742403	0.447531	0.239113	1.06108	0.562031
	ONLI_0593	PC 34:2e; PC 16:0e/18:2;	CSHNEG	IQACMFWAGALEAQ-WESJWMGVSA-N	6443157	CCCCCCCCCCCCCCCCOC[C@H](COP(=O)([O-])OCC[N+](C)(C)C)OC(=O)CCCCCCC/C=C\C/C=C\CCCCC	20	20	0.260802	0.260802	5.32e-10	1.5621	2.00676	1.21e-08
	ONLI_0594	SM d38:1; SM d16:1/22:0;	CSHNEG	XNBRFUCJENKXCT-SVLGDMRNSA-N	52931183	CCCCCCCCCCCCCCCCCCCCCC(=O)N[C@@H](COP(=O)([O-])OCC[N+](C)(C)C)[C@@H](/C=C/CCCCCCCCCCC)O	20	20	0.997849	0.899385	0.0163751	0.715273	1.44078	0.033372
	ONLI_0596	PC 34:1e; PC 16:0e/18:1;	CSHNEG	JJGMGPGKWYLISM-NPBIGWJUSA-N	42607455	CCCCCCCCCCCCCCCCOC[C@H](COP(=O)(O)OCCN)OC(=O)CCCCCCC/C=C\CCCCCCCC	20	20	0.998872	0.899507	0.000198602	1.0801	1.17684	0.000603299
	ONLI_0597	PI 32:1; PI 16:0-16:1;	CSHNEG	QAWXBJDYTIBLRK-JEHNQGNYSA-N	52928334	CCCCCCCCCCCCCCCC(=O)OC[C@H](COP(=O)(O)OC1C([C@@H](C(C(C1O)O)O)O)O)OC(=O)CCCCCCC/C=C\CCCCCC	20	20	0.899318	0.390867	2.01e-09	1.47028	4.88409	2.74e-08
	ONLI_0598	PI 32:0; PI 16:0-16:0;	CSHNEG	IBUKXRINTKQBRQ-CSRWQWPHSA-N	24779556	CCCCCCCCCCCCCCCC(=O)OC[C@H](COP(=O)(O)OC1C([C@@H](C(C(C1O)O)O)O)O)OC(=O)CCCCCCCCCCCCCCC	20	20	0.998202	0.995234	0.0171255	0.730099	1.31731	0.0346383
	ONLI_0599	PC 34:4; PC 14:0-20:4;	CSHNEG	BXZPYXMUABUWBT-JAHIUHDMSA-N	53478607	CCCCCCCCCCCCCC(=O)OC[C@H](COP(=O)([O-])OCC[N+](C)(C)C)OC(=O)CCCCCC/C=C\C/C=C\C/C=C\C/C=C\CC	20	20	0.66935	0.809842	1.15e-06	1.32562	1.61255	5.93e-06
	ONLI_0600	PC 34:3	CSHNEG	CNNSEHUKQJCGTE-UPPWDXJYSA-N	24778699	CCCCCCCCCCCCCCCC(=O)OC[C@H](COP(=O)([O-])OCC[N+](C)(C)C)OC(=O)CCCC/C=C\C/C=C\C/C=C\CCCCC	20	20	0.586877	0.832999	2.65e-09	1.50641	1.90747	3.38e-08
	ONLI_0601	PC 34:3; PC 16:1-18:2;	CSHNEG	QJWDAOSZZYVBJZ-KXESGEQTSA-N	24778768	CCCCCC/C=C\CCCCCCCC(=O)OC[C@H](COP(=O)([O-])OCC[N+](C)(C)C)OC(=O)CCCCCCC/C=C\C/C=C\CCCCC	20	20	0.371751	0.371751	6.22e-10	1.53396	2.43966	1.28e-08
	ONLI_0603	PC 36:5e; PC 16:1e/20:4;	CSHNEG	HOTMLHWJOWGLLX-UZKIFIPLSA-N	53481713	CCCCCC/C=C\CCCCCCCCOC[C@H](COP(=O)([O-])OCC[N+](C)(C)C)OC(=O)CCC/C=C\C/C=C\C/C=C\C/C=C\CCCCC	20	19	0.99996	0.808023	5.79e-07	-1.35853	0.765534	3.26e-06
	ONLI_0604	16:0-20:4 PC	CSHNEG	IIZPXYDJLKNOIY-JXPKJXOSSA-N	10747814	CCCCCCCCCCCCCCCC(=O)OC[C@H](COP(=O)([O-])OCC[N+](C)(C)C)OC(=O)CCC/C=C\C/C=C\C/C=C\C/C=C\CCCCC	19	20	0.82613	0.882048	0.0321777	0.652201	1.18647	0.0608053
	ONLI_0605	PC 36:4e; PC 16:0e/20:4;	CSHNEG	SOUZQPFUXRVDGK-KCTKZSJBSA-N	53481701	CCCCCCCCCCCCCCCCOC[C@H](COP(=O)([O-])OCC[N+](C)(C)C)OC(=O)CCCCCC/C=C\C/C=C\C/C=C\C/C=C\CC	20	20	0.990111	0.80083	4.92e-07	1.36398	1.32072	2.83e-06
	ONLI_0606	PC 36:3; PC 16:0-20:3;	CSHNEG	SRIGHEHXEGELQJ-YYQUKWHJSA-N	24778719	CCCCCCCCCCCCCCCC(=O)OC[C@H](COP(=O)([O-])OCC[N+](C)(C)C)OC(=O)CCCCCC/C=C\C/C=C\C/C=C\CCCCC	20	20	0.877872	0.868425	0.00601533	0.778658	1.32041	0.0134509
	ONLI_0607	PC 36:3e; PC 18:1e/18:2;	CSHNEG	MFZLAZYUXHHSIA-HVODBARTSA-N	6443159	CCCCCCCC/C=C\CCCCCCCCOC[C@H](COP(=O)([O-])OCC[N+](C)(C)C)OC(=O)CCCCCCC/C=C\C/C=C\CCCCC	20	20	0.99809	0.000123335	3.23e-05	1.08	1.95703	0.000120822
	ONLI_0608	SM d40:2; SM d14:0/26:2;	CSHNEG	0	NA	0	20	20	0.741763	0.410589	1.49e-09	1.51641	3.06321	2.3e-08
	ONLI_0609	PC 36:2e; PC 18:0e/18:2;	CSHNEG	LMGTVCKIUNTOEP-HJTCUGKVSA-N	6443070	CCCCCCCCCCCCCCCCCCOC[C@H](COP(=O)([O-])OCC[N+](C)(C)C)OC(=O)CCCCCCC/C=C\C/C=C\CCCCC	20	20	0.945449	0.951941	0.000124024	1.07241	1.28944	0.000396188
	ONLI_0611	SM d39:1; SM d16:1/23:0;	CSHNEG	DZDNLWWCTCDASI-QVDCKBILSA-N	52931189	CCCCCCCCCCCCCCCCCCCCCCC(=O)N[C@@H](COP(=O)([O-])OCC[N+](C)(C)C)[C@@H](/C=C/CCCCCCCCCCC)O	20	20	0.260802	0.260802	5.47e-10	1.56015	2.24395	1.21e-08
	ONLI_0613	PC 35:1; PC 17:0-18:1;	CSHNEG	SXNXGNVZTLZDHE-IYEJTHTFSA-O	5313302	CCCCCCCCCCCCCCCCC(=O)OC[C@H](COP(=O)(O)OCC[N+](C)(C)C)OC(=O)CCCCCCC/C=C\CCCCCCCC	20	20	0.418682	0.626264	9.84e-10	1.55205	1.62915	1.69e-08
	ONLI_0614	PI 34:2; PI 16:0-18:2;	CSHNEG	BSNJSZUDOMPYIR-YBCFFXQBSA-N	46891796	CCCCCCCCCCCCCCCC(=O)OC[C@H](COP(=O)(O)OC1C([C@@H](C(C(C1O)O)O)O)O)OC(=O)CCCCCCC/C=C\C/C=C\CCCCC	20	20	0.828378	0.986045	1.66e-08	1.44905	1.88586	1.35e-07
	ONLI_0615	PI 34:1; PI 16:0-18:1;	CSHNEG	PDLAMJKMOKWLAJ-PVPULFMTSA-N	5771758	CCCCCCCCCCCCCCCC(=O)OC[C@H](COP(=O)(O)OC1C([C@@H](C(C(C1O)O)O)O)O)OC(=O)CCCCCCC/C=C\CCCCCCCC	20	20	0.997333	0.999989	8.24e-07	1.33053	1.85563	4.48e-06
	ONLI_0617	PC 36:4; PC 16:0-20:4;	CSHNEG	JAVWFBAAZSHHAD-HCYAGMRRSA-N	53478669	CCCCCCCCCCCCCCCC(=O)OC[C@H](COP(=O)([O-])OCC[N+](C)(C)C)OC(=O)CCCCCC/C=C\C/C=C\C/C=C\C/C=C\CC	20	20	0.707264	0.797569	0.000123524	1.06996	1.14349	0.000396162
	ONLI_0618	HexCer-NS d40:2; HexCer-NS d18:1/22:1;	CSHNEG	0	NA	0	20	20	0.999904	0.511045	3.38e-08	1.44796	3.55734	2.54e-07
	ONLI_0619	SM d40:3; SM d14:1/26:2;	CSHNEG	FMJPKVXVBYILLP-FTRJIJDXSA-N	52931199	CCCCCCCC/C=C\CCCCCCCCCCCC(=O)N[C@@H](COP(=O)([O-])OCC[N+](C)(C)C)[C@@H](/C=C/CCCCCCCC/C=C\CCC)O	20	20	0.795089	0.899318	4.72e-09	1.50542	2.36157	5e-08
	ONLI_0620	PC 36:3 a	CSHNEG	YBNAKFLXDDROCX-YGRWKTHCSA-N	53478723	CCCCCC/C=C\CCCCCCCCCC(=O)OC[C@H](COP(=O)([O-])OCC[N+](C)(C)C)OC(=O)CCCCCCC/C=C\C/C=C\CCCCC	20	19	0.996399	0.720441	3.53e-08	1.36083	1.34501	2.58e-07
	ONLI_0621	PC 36:3 b	CSHNEG	XMZFUVYOYPLVOA-VLHUWQDUSA-N	24778715	CCCCCCCCCCCCCCCC(=O)OC[C@H](COP(=O)([O-])OCC[N+](C)(C)C)OC(=O)CCC/C=C\C/C=C\C/C=C\CCCCCCCC	20	19	0.618345	0.945983	1.22e-07	1.32813	1.363	8.02e-07
	ONLI_0622	PC 36:3; PC 18:1-18:2;	CSHNEG	GDWULUGDXGHJIJ-VJHNMZKJSA-N	24778939	CCCCCCCC/C=C\CCCCCCCC(=O)OC[C@H](COP(=O)([O-])OCC[N+](C)(C)C)OC(=O)CCCCCCC/C=C\C/C=C\CCCCC	20	19	0.996399	0.720441	3.53e-08	1.36083	1.34501	2.58e-07
	ONLI_0623	SM d40:2; SM d18:2/22:0;	CSHNEG	APNZBDYCMWLVNM-NWHASJFHSA-N	52931237	CCCCCCCCCCCCCCCCCCCCCC(=O)N[C@@H](COP(=O)([O-])OCC[N+](C)(C)C)[C@@H](/C=C/CCCCCCCC/C=C\CCC)O	20	20	0.260802	0.260802	5.34e-10	1.54625	3.0918	1.21e-08
	ONLI_0625	PC 36:2; PC 18:0-18:2;	CSHNEG	FORFDCPQKJHEBF-VPUSDGANSA-N	6441487	CCCCCCCCCCCCCCCCCC(=O)OC[C@H](COP(=O)([O-])OCC[N+](C)(C)C)OC(=O)CCCCCCC/C=C\C/C=C\CCCCC	20	20	0.99968	0.997647	2.32e-05	1.17176	1.16617	8.94e-05
	ONLI_0628	PI 35:2; PI 17:0-18:2;	CSHNEG	AJAKJCJJRMUWFW-WNEYDAEMSA-N	52927654	CCCCCCCCCCCCCCCCC(=O)OC[C@H](COP(=O)(O)OC1C([C@@H](C(C(C1O)O)O)O)O)OC(=O)CCCCCCC/C=C\C/C=C\CCCCC	20	20	0.968077	0.612203	7.37e-08	1.40106	1.95796	5.07e-07
	ONLI_0629	PC 36:0; PC 16:0-20:0;	CSHNEG	HVPURDWMANOTFO-HUESYALOSA-N	24778711	CCCCCCCCCCCCCCCCCCCC(=O)O[C@H](COC(=O)CCCCCCCCCCCCCCC)COP(=O)([O-])OCC[N+](C)(C)C	20	19	0.600995	0.287396	0.183218	-0.378423	0.635481	0.279338
	ONLI_0631	PC 38:6e; PC 18:2e/20:4;	CSHNEG	ZZSZQATYGVHNLZ-PUMLCSCDSA-N	24778979	CCCCC/C=C\C/C=C\CCCCCCCC(=O)OC[C@H](COP(=O)([O-])OCC[N+](C)(C)C)OC(=O)CCC/C=C\C/C=C\C/C=C\C/C=C\CCCCC	20	20	0.968837	0.992612	0.148723	0.457104	1.15559	0.236138
	ONLI_0632	PC 38:5e; PC 18:1e/20:4; [M+Hac-H]-	CSHNEG	YPEVVVCDYBKGNI-XVPBXHJGSA-O	70698776	CCCCCCCC/C=C\CCCCCCCCOC[C@H](COP(=O)(O)OCC[N+](C)(C)C)OC(=O)CCCCCC/C=C\C/C=C\C/C=C\C/C=C\CC	20	20	0.998675	0.999595	6.9e-05	1.09361	1.22885	0.000243485
	ONLI_0633	PC 37:4; PC 17:0-20:4;	CSHNEG	MHUZXLUKTLNHIX-GUNPMBPGSA-N	24778518	CCCCCCCCCCCCCCCCC(=O)OC[C@H](COP(=O)([O-])OCC[N+](C)(C)C)OC(=O)CCC/C=C\C/C=C\C/C=C\C/C=C\CCCCC	20	20	0.989145	0.999566	0.216095	0.39046	1.05312	0.322739
	ONLI_0635	PC 38:4e; PC 18:0e/20:4;	CSHNEG	GBNPCIWXLWZJGA-IGBSIYCFSA-N	6443065	CCCCCCCCCCCCCCCCCCOC[C@H](COP(=O)([O-])OCC[N+](C)(C)C)OC(=O)CCC/C=C\C/C=C\C/C=C\C/C=C\CCCCC	19	20	0.28515	0.770021	0.845863	0.0589919	1.01523	0.891257
	ONLI_0637	GlcCerd18:14E/24:0	CSHNEG	POQRWMRXUOPCLD-AAAFHMTMSA-N	6321361	CCCCCCCCCCCCCCCCCCCCCCCC(=O)N[C@@H](CO[C@H]1C(C([C@@H]([C@H](O1)CO)O)O)O)[C@@H](/C=C/CCCCCCCCCCCCC)O	20	20	0.999176	0.997189	0.659563	-0.12948	0.992533	0.745714
	ONLI_0638	PI 36:4; PI 16:0-20:4;	CSHNEG	VWRYMIZQLPXULA-ZLIQYQLMSA-N	53480053	CCCCCCCCCCCCCCCC(=O)OC[C@H](COP(=O)(O)OC1C([C@@H](C(C(C1O)O)O)O)O)OC(=O)CCCCCC/C=C\C/C=C\C/C=C\C/C=C\CC	20	20	0.496067	0.990848	9.53e-09	1.47484	1.88204	8.53e-08
	ONLI_0640	PC 37:2; PC 19:0-18:2;	CSHNEG	LOOVXTAPKGYHKO-HJTCUGKVSA-N	52922957	CCCCCCCCCCCCCCCCCCC(=O)OC[C@H](COP(=O)([O-])OCC[N+](C)(C)C)OC(=O)CCCCCCC/C=C\C/C=C\CCCCC	20	20	0.260802	0.260802	5.56e-10	1.54936	2.52859	1.21e-08
	ONLI_0641	PI 36:3; PI 18:1-18:2;	CSHNEG	MXJMOLQIXMJUEL-PEAJWMICSA-N	52928384	CCCCCCCC/C=C\CCCCCCCC(=O)OC[C@H](COP(=O)(O)OC1C([C@@H](C(C(C1O)O)O)O)O)OC(=O)CCCCCCC/C=C\C/C=C\CCCCC	20	20	0.260802	0.260802	3.66e-10	1.53363	1.89887	1.21e-08
	ONLI_0643	PC 37:1; PC 19:0-18:1;	CSHNEG	WMCPHMOQTITNBG-KXTYCBLYSA-N	52922955	CCCCCCCCCCCCCCCCCCC(=O)OC[C@H](COP(=O)([O-])OCC[N+](C)(C)C)OC(=O)CCCCCCC/C=C\CCCCCCCC	20	20	0.260802	0.260802	5.12e-10	1.56419	2.79135	1.21e-08
	ONLI_0644	PI 36:2; PI 18:0-18:2;	CSHNEG	KZVRAFHIKMDULK-LNVBWDHHSA-N	52928409	CCCCCCCCCCCCCCCCCC(=O)OC[C@H](COP(=O)(O)OC1C([C@@H](C(C(C1O)O)O)O)O)OC(=O)CCCCCCC/C=C\C/C=C\CCCCC	20	20	1	0.948094	2.52e-06	1.28084	1.62074	1.2e-05
	ONLI_0645	PC 38:7; PC 16:1-22:6;	CSHNEG	DLRNZUPJXRVWRW-FKZZUUMNSA-N	24778773	CCCCCC/C=C\CCCCCCCC(=O)OC[C@H](COP(=O)([O-])OCC[N+](C)(C)C)OC(=O)CC/C=C\C/C=C\C/C=C\C/C=C\C/C=C\C/C=C\CC	20	20	0.999961	0.670004	3.38e-08	1.44749	2.42651	2.54e-07
	ONLI_0646	PI 36:1; PI 18:0-18:1;	CSHNEG	YOBFISPJJWPPTK-UDGQDVNKSA-N	13073037	CCCCCCCCCCCCCCCCCC(=O)OCC(COP(=O)(O)OC1[C@@H]([C@H](C([C@H]([C@@H]1O)O)O)O)O)OC(=O)CCCCCCC/C=C/CCCCCCCC	20	20	0.991719	0.865829	8.34e-05	1.13969	1.51172	0.00028583
	ONLI_0648	PC 38:6; PC 18:2-20:4;	CSHNEG	RUHBZJXWUDKAMZ-XXAGCNFXSA-N	53478789	CCCCC/C=C\C/C=C\CCCCCCCC(=O)OC[C@H](COP(=O)([O-])OCC[N+](C)(C)C)OC(=O)CCCCCC/C=C\C/C=C\C/C=C\C/C=C\CC	20	20	0.999999	0.596531	1.37e-07	1.36892	1.42286	8.88e-07
	ONLI_0649	SM d42:5; SM d14:3/28:2;	CSHNEG	0	NA	0	20	20	0.000539932	0.260802	6.15e-11	-1.50883	0.109411	1.21e-08
	ONLI_0650	PC 38:5; PC 16:0-22:5;	CSHNEG	ARDJUHDXABDVFH-ZHSIBHBUSA-N	24778737	CCCCCCCCCCCCCCCC(=O)OC[C@H](COP(=O)([O-])OCC[N+](C)(C)C)OC(=O)CCCCC/C=C\C/C=C\C/C=C\C/C=C\C/C=C\CC	19	20	0.57852	0.985785	0.00537966	0.807258	1.23892	0.0121647
	ONLI_0651	PC 38:5; PC 18:1-20:4;	CSHNEG	SWOKEJBWARJLGN-ORKYUJCWSA-N	53478767	CCCCCCCC/C=C\CCCCCCCC(=O)OC[C@H](COP(=O)([O-])OCC[N+](C)(C)C)OC(=O)CCCCCC/C=C\C/C=C\C/C=C\C/C=C\CC	20	20	0.967567	0.869853	0.00812955	0.809089	1.19586	0.0176396
	ONLI_0652	HexCer-NS d42:3; HexCer-NS d18:1/24:2;	CSHNEG	0	NA	0	20	20	0.559455	0.98286	0.00272901	-0.870463	0.787925	0.00661702
	ONLI_0653	PC 38:4	CSHNEG	PSVRFUPOQYJOOZ-QNPWAGBNSA-N	16219824	CCCCCCCCCCCCCCCCCC(=O)OC[C@H](COP(=O)([O-])OCC[N+](C)(C)C)OC(=O)CCC/C=C\C/C=C\C/C=C\C/C=C\CCCCC	20	20	0.993567	0.996266	0.000906534	-0.989738	0.843825	0.00240845
	ONLI_0654	PC 38:4; PC 16:0-22:4;	CSHNEG	IRWRFKUTKSUFST-MDYGELLQSA-N	24778732	CCCCCCCCCCCCCCCC(=O)OC[C@H](COP(=O)([O-])OCC[N+](C)(C)C)OC(=O)CCCCC/C=C\C/C=C\C/C=C\C/C=C\CCCCC	20	20	0.993567	0.996266	0.000906534	-0.989738	0.843825	0.00240845
	ONLI_0656	SM d42:3; SM d18:2/24:1;	CSHNEG	TXFLWJQVQCDUDZ-BRUGZULGSA-N	52931215	CCCCCCCC/C=C\CCCCCCCCCCCCCC(=O)N[C@@H](COP(=O)([O-])OCC[N+](C)(C)C)[C@@H](/C=C/CCCCCCCC/C=C\CCC)O	19	20	0.874515	0.993403	0.558225	-0.177336	0.988814	0.666723
	ONLI_0657	PC 38:3	CSHNEG	QXDDDGCNWRUEFM-UMKMFDOBSA-N	24778855	CCCCCCCCCCCCCCCCCC(=O)OC[C@H](COP(=O)([O-])OCC[N+](C)(C)C)OC(=O)CCC/C=C\C/C=C\C/C=C\CCCCCCCC	20	20	0.912528	0.797296	0.00112105	0.938898	1.32238	0.00293001
	ONLI_0658	PC 38:3; PC 18:0-20:3;	CSHNEG	VGSUMLIRUGDCTF-NSMRCOLJSA-N	24778857	CCCCCCCCCCCCCCCCCC(=O)OC[C@H](COP(=O)([O-])OCC[N+](C)(C)C)OC(=O)CCCCCC/C=C\C/C=C\C/C=C\CCCCC	20	20	0.839977	0.761327	0.00164169	0.917385	1.31834	0.00414282
	ONLI_0659	PI 37:4; PI 17:0-20:4;	CSHNEG	IVKFRZJXXGDYJH-YAOSNULYSA-N	9547141	CCCCCCCCCCCCCCCCC(=O)OC[C@H](COP(=O)(O)OC1C([C@@H](C(C(C1O)O)O)O)O)OC(=O)CCC/C=C\C/C=C\C/C=C\C/C=C\CCCCC	20	20	0.811872	0.811872	3.34e-09	1.49839	1.53107	3.86e-08
	ONLI_0661	SM d42:2; SM d18:1/24:1;	CSHNEG	SUTDVWUQTJGTCQ-IMMYYDDQSA-N	138265057	CCCCCCCCCCCCC/C=C/C(C(COP(=O)([O-])OCC[N+](C)(C)C)NC(=O)CCCCCCCCC/C=C\CCCCCCCCCCCC)O	20	19	0.685975	0.854558	0.026181	-0.676419	0.920624	0.0507848
	ONLI_0663	PC 38:1; PC 20:0-18:1;	CSHNEG	IKNYBQRADNMEDT-FHLWKLDVSA-N	24779038	CCCCCCCCCCCCCCCCCCCC(=O)OC[C@H](COP(=O)([O-])OCC[N+](C)(C)C)OC(=O)CCCCCCC/C=C\CCCCCCCC	20	20	0.260802	0.260802	5.67e-10	1.55549	2.48936	1.21e-08
	ONLI_0664	PI 37:2; PI 19:0-18:2;	CSHNEG	NUMIHVUWHVIWMT-ISIIRVGKSA-N	52927884	CCCCCCCCCCCCCCCCCCC(=O)OC[C@H](COP(=O)(O)OC1C([C@@H](C(C(C1O)O)O)O)O)OC(=O)CCCCCCC/C=C\C/C=C\CCCCC	20	19	0.940472	0.527312	8.07e-09	1.4336	4.0116	7.33e-08
	ONLI_0665	PC 40:6; PC 18:0-22:6;	CSHNEG	FAUYAENFVCNTAL-PFFNLMTBSA-N	24778876	CCCCCCCCCCCCCCCCCC(=O)OC[C@H](COP(=O)([O-])OCC[N+](C)(C)C)OC(=O)CC/C=C\C/C=C\C/C=C\C/C=C\C/C=C\C/C=C\CC	20	20	0.856417	0.644776	0.919736	-0.0315176	1.00828	0.939578
	ONLI_0666	PI 38:6; PI 16:0-22:6;	CSHNEG	FPHAZHKZJQOPBU-BYFJYSEFSA-N	52927464	CCCCCCCCCCCCCCCC(=O)OC[C@H](COP(=O)(O)OC1C([C@@H](C(C(C1O)O)O)O)O)OC(=O)CC/C=C\C/C=C\C/C=C\C/C=C\C/C=C\C/C=C\CC	20	20	0.709311	0.868286	5.06e-09	1.48207	1.73643	5.15e-08
	ONLI_0667	PC 39:4; PC 19:0-20:4;	CSHNEG	XHOZASDZLMZZMU-TTYGYADASA-N	52922975	CCCCCCCCCCCCCCCCCCC(=O)OC[C@H](COP(=O)([O-])OCC[N+](C)(C)C)OC(=O)CCC/C=C\C/C=C\C/C=C\C/C=C\CCCCC	20	20	0.260802	0.260802	5.68e-10	1.55497	1.89613	1.21e-08
	ONLI_0668	PI 38:5; PI 18:1-20:4;	CSHNEG	SHIZRFSRTKXRQL-FFZLMNBLSA-N	52928302	CCCCCCCC/C=C\CCCCCCCC(=O)OC[C@H](COP(=O)(O)OC1C([C@@H](C(C(C1O)O)O)O)O)OC(=O)CCC/C=C\C/C=C\C/C=C\C/C=C\CCCCC	20	20	0.750757	0.850892	3.36e-09	1.48321	2.20439	3.86e-08
	ONLI_0669	PI 38:4; PI 18:0-20:4;	CSHNEG	KRTOMQDUKGRFDJ-LWFBQQSYSA-N	42607491	CCCCCCCCCCCCCCCCCC(=O)OC[C@H](COP(=O)(O)OC1C([C@@H](C(C(C1O)O)O)O)O)OC(=O)CCC/C=C\C/C=C\C/C=C\C/C=C\CCCCC	20	20	0.972467	0.998964	0.0270467	0.661414	1.14684	0.0519632
	ONLI_0670	PI 38:3; PI 18:0-20:3;	CSHNEG	ZUGLBBVIAIBIKG-BZXCBJNASA-N	52928308	CCCCCCCCCCCCCCCCCC(=O)OC[C@H](COP(=O)(O)OC1C([C@@H](C(C(C1O)O)O)O)O)OC(=O)CCCCCC/C=C\C/C=C\C/C=C\CCCCC	20	20	0.832912	0.392136	1.02e-09	1.49347	2.39683	1.69e-08
	ONLI_0671	PC 40:8; PC 18:2-22:6;	CSHNEG	FCTKCFNDGVBOBD-YZXVGOFNSA-N	24778983	CCCCC/C=C\C/C=C\CCCCCCCC(=O)OC[C@H](COP(=O)([O-])OCC[N+](C)(C)C)OC(=O)CC/C=C\C/C=C\C/C=C\C/C=C\C/C=C\C/C=C\CC	20	20	0.260802	0.260802	4.19e-10	1.53695	1.63637	1.21e-08
	ONLI_0672	PC 40:7; PC 18:1-22:6;	CSHNEG	FPEVDFOXMCHLKL-KFDYCXSYSA-N	24778955	CCCCCCCC/C=C\CCCCCCCC(=O)OC[C@H](COP(=O)([O-])OCC[N+](C)(C)C)OC(=O)CC/C=C\C/C=C\C/C=C\C/C=C\C/C=C\C/C=C\CC	20	20	0.988093	0.996795	0.00682562	0.817456	1.21068	0.0150951
	ONLI_0673	PC 40:6	CSHNEG	FYVNIFOYDIIODX-KNKJIUSSSA-N	24778900	CCCCCC/C=C\CCCCCCCCCC(=O)OC[C@H](COP(=O)([O-])OCC[N+](C)(C)C)OC(=O)CCCCC/C=C\C/C=C\C/C=C\C/C=C\C/C=C\CC	20	19	0.898434	0.645772	0.0213801	-0.683281	0.891044	0.0422875
	ONLI_0674	PC 40:5; PC 18:0-22:5;	CSHNEG	MAAMGQXOTCBPFS-JPGWWKBXSA-N	24778873	CCCCCCCCCCCCCCCCCC(=O)OC[C@H](COP(=O)([O-])OCC[N+](C)(C)C)OC(=O)CCCCC/C=C\C/C=C\C/C=C\C/C=C\C/C=C\CC	20	19	0.999876	0.801227	0.0801852	0.468145	1.17859	0.137925
	ONLI_0675	PC 40:4	CSHNEG	UAVRPIXHIHJERN-CBTSKTMBSA-N	24779048	CCCCCCCCCCCCCCCCCCCC(=O)OC[C@H](COP(=O)([O-])OCC[N+](C)(C)C)OC(=O)CCC/C=C\C/C=C\C/C=C\C/C=C\CCCCC	20	20	0.260802	0.260802	4.62e-10	1.5684	6.49275	1.21e-08
	ONLI_0676	PC 40:4; PC 18:0-22:4;	CSHNEG	QQIYXJBHMDYXHH-NMUBDWGHSA-N	52923573	CCCCC/C=C\C/C=C\CCCCCCCCCCCC(=O)OC[C@H](COP(=O)([O-])OCC[N+](C)(C)C)OC(=O)CCCCCCC/C=C\C/C=C\CCCCC	20	20	0.99458	0.986063	0.570426	0.179899	1.04627	0.678276
	ONLI_0677	PI 39:4; PI 19:0-20:4;	CSHNEG	UNISCSAECSQMPE-LSUZBHEKSA-N	52927893	CCCCCCCCCCCCCCCCCCC(=O)OC[C@H](COP(=O)(O)OC1C([C@@H](C(C(C1O)O)O)O)O)OC(=O)CCC/C=C\C/C=C\C/C=C\C/C=C\CCCCC	20	20	0.497908	0.410042	4.7e-10	1.56897	2.552	1.21e-08
	ONLI_0679	PI 40:6; PI 18:0-22:6;	CSHNEG	DJVOKHFQPGWUPK-PNBUVQRSSA-N	52927465	CCCCCCCCCCCCCCCCCC(=O)OC[C@H](COP(=O)(O)OC1C([C@@H](C(C(C1O)O)O)O)O)OC(=O)CC/C=C\C/C=C\C/C=C\C/C=C\C/C=C\C/C=C\CC	20	19	0.998418	0.522656	7.53e-07	1.30097	1.44016	4.15e-06
	ONLI_0680	PI 40:5; PI 18:0-22:5;	CSHNEG	QLABQLNIHHHJCI-FCGLMCRWSA-N	53480067	CCCCCCCCCCCCCCCCCC(=O)OC[C@H](COP(=O)(O)OC1C([C@@H](C(C(C1O)O)O)O)O)OC(=O)CCCCC/C=C\C/C=C\C/C=C\C/C=C\C/C=C\CC	20	20	0.850988	0.731126	2.86e-09	1.49243	2.37543	3.54e-08
	ONLI_0682	PI 40:4; PI 20:0-20:4;	CSHNEG	FPYBELXGPLJKPW-NGNRSKJCSA-N	52928284	CCCCCCCCCCCCCCCCCCCC(=O)OC[C@H](COP(=O)(O)OC1C([C@@H](C(C(C1O)O)O)O)O)OC(=O)CCC/C=C\C/C=C\C/C=C\C/C=C\CCCCC	20	20	0.959347	0.963897	0.000637697	0.982437	2.72258	0.00177016
	ONLI_0683	PC 42:7; PC 20:1-22:6;	CSHNEG	FYVDGOCCFDKYOR-OEQCKVCZSA-N	52923147	CCCCCCCC/C=C\CCCCCCCCCC(=O)OC[C@H](COP(=O)([O-])OCC[N+](C)(C)C)OC(=O)CC/C=C\C/C=C\C/C=C\C/C=C\C/C=C\C/C=C\CC	20	20	0.260802	0.260802	5.68e-10	1.55324	2.81408	1.21e-08
	ONLI_0702	2R-3-Hydroxyisovaleroylcarnitine	HILICPOS	IGLHHSKNBDXCEY-SECBINFHSA-N	131668011	CC(C)(CC(=O)O[C@H](CC(=O)[O-])C[N+](C)(C)C)O	20	20	0.947631	0.725631	0.218692	-0.378803	0.922307	0.326012
	ONLI_0703	R-Butyrylcarnitine	HILICPOS	QWYFHHGCZUCMBN-SECBINFHSA-N	213144	CCCC(=O)O[C@H](CC(=O)[O-])C[N+](C)(C)C	20	20	0.961362	0.99955	0.538524	-0.196768	0.918522	0.64897
	ONLI_0704	S-Cotinine N-oxide	HILICPOS	CIPULDKLIIVIER-VIFPVBQESA-N	9815514	CN1[C@@H](CCC1=O)C2=C[N+](=CC=C2)[O-]	20	20	0.9805	0.999637	0.396278	-0.235595	0.82871	0.51955
	ONLI_0705	1-Methyl-L-histidine	HILICPOS	BJHIKXHVCXFQLS-OTWZMJIISA-NÂ	92105	CN1C=C(N=C1)C[C@@H](C(=O)O)N	20	20	0.379945	0.996465	7.81e-08	1.37904	1.7103	5.28e-07
	ONLI_0706	2-Indolinone	HILICPOS	JYGFTBXVXVMTGB-UHFFFAOYSA-N	321710	C1C2=CC=CC=C2NC1=O	20	20	0.611794	0.997775	3.79e-06	-1.28177	0.411076	1.78e-05
	ONLI_0707	3-Hydroxybutyrylcarnitine	HILICPOS	UEFRDQSMQXDWTO-YGPZHTELSA-N	90659885	CC(CC(=O)O[C@H](CC(=O)[O-])C[N+](C)(C)C)O	20	20	0.532628	0.151463	0.0389345	0.644007	1.16743	0.0722172
	ONLI_0708	4-Hydroxynonenal	HILICPOS	JVJFIQYAHPMBBX-FNORWQNLSA-N	5283344	CCCCCC(/C=C/C=O)O	20	20	0.926012	0.985647	0.206938	-0.396105	1.13745	0.311373
	ONLI_0710	5-Hydroxytryptophol	HILICPOS	KQROHCSYOGBQGJ-UHFFFAOYSA-N	9061	C1=CC2=C(C=C1O)C(=CN2)CCO	20	20	0.877792	0.803005	0.266664	-0.331055	0.711627	0.384015
	ONLI_0711	5-Methylcytosine	HILICPOS	LRSASMSXMSNRBT-UHFFFAOYSA-N	65040	CC1=C(NC(=O)N=C1)N	20	20	0.0594012	0.174037	0.64475	0.146631	1.02876	0.733012
	ONLI_0712	7-Keto-3a,12-a-dihydroxycholanic acid	HILICPOS	RHCPKKNRWFXMAT-RRWYKFPJSA-N	188292	C[C@H](CCC(=O)O)[C@H]1CC[C@@H]2[C@@]1([C@H](C[C@H]3[C@H]2C(=O)C[C@H]4[C@@]3(CC[C@H](C4)O)C)O)C	19	20	0.000131472	2.31e-07	0.29884	0.253219	1.4241	0.419104
	ONLI_0714	Arg-Ala	HILICPOS	WVRUNFYJIHNFKD-UHFFFAOYSA-N	4198036	CC(C(=O)O)NC(=O)C(CCCN=C(N)N)N	20	20	0.637453	0.927939	0.0211638	0.672979	1.17799	0.0419626
	ONLI_0717	Arg-Gly	HILICPOS	XUUXCWCKKCZEAW-UHFFFAOYSA-N	5074903	C(CC(C(=O)NCC(=O)O)N)CN=C(N)N	20	20	0.824013	0.997807	0.141005	0.455067	1.12495	0.225665
	ONLI_0720	Arg-Ser	HILICPOS	IJYZHIOOBGIINM-UHFFFAOYSA-N	9943142	C(CC(C(=O)NC(CO)C(=O)O)N)CN=C(N)N	20	20	0.00407963	0.0340626	0.899112	-0.030067	1.02732	0.928139
	ONLI_0722	Arg-Val	HILICPOS	DAQIJMOLTMGJLO-UHFFFAOYSA-N	335257	CC(C)C(C(=O)O)NC(=O)C(CCCN=C(N)N)N	20	20	8.04e-06	0.0124067	0.0521687	-0.50677	0.693447	0.0925018
	ONLI_0729	Glu-Arg	HILICPOS	MPZWMIIOPAPAKE-BQBZGAKWSA-N	9796450	C(C[C@@H](C(=O)O)NC(=O)[C@H](CCC(=O)O)N)CN=C(N)N	20	20	0.871858	0.619866	0.528574	0.201187	1.05285	0.637934
	ONLI_0730	Gluconolactone	HILICPOS	PHOQVHQSTUBQQK-SQOUGZDYSA-N	7027	C([C@@H]1[C@H]([C@@H]([C@H](C(=O)O1)O)O)O)O	19	20	0.779553	0.876277	0.221139	-0.368653	0.933138	0.328445
	ONLI_0731	Glu-Lys	HILICPOS	BBBXWRGITSUJPB-YUMQZZPRSA-N	7015703	C(CC[NH3+])C[C@@H](C(=O)[O-])NC(=O)[C@H](CCC(=O)[O-])[NH3+]	20	19	0.115264	0.221959	0.883252	-0.0449941	0.933575	0.916261
	ONLI_0732	Glu-Phe	HILICPOS	XMBSYZWANAQXEV-QWRGUYRKSA-N	18653118	C1=CC=C(C=C1)C[C@@H](C(=O)O)NC(=O)[C@H](CCC(=O)O)N	20	20	0.67448	0.780929	0.0811131	0.540017	1.10954	0.139224
	ONLI_0733	Glycerophosphocholine	HILICPOS	SUHOQUVVVLNYQR-QMMMGPOBSA-N	71920	C[N+](C)(C)CCOP(=O)([O-])OC[C@H](CO)O	20	20	0.718878	0.251811	0.000464593	-1.01315	0.781175	0.00135017
	ONLI_0734	Glycyl-leucine	HILICPOS	DKEXFJVMVGETOO-LURJTMIESA-N	92843	CC(C)C[C@@H](C(=O)O)NC(=O)CN	20	20	0.936489	0.965057	0.00266906	-0.857603	0.828965	0.0065109
	ONLI_0735	Hexanoyl-L-carnitine	HILICPOS	VVPRQWTYSNDTEA-LLVKDONJSA-N	3246938	CCCCCC(=O)O[C@H](CC(=O)[O-])C[N+](C)(C)C	20	20	0.944757	0.996869	0.685817	-0.129665	0.931037	0.765718
	ONLI_0739	Isovaleryl-L-carnitine	HILICPOS	IGQBPDJNUXPEMT-UHFFFAOYSA-N	6426851	CC(C)CC(=O)OC(CC(=O)[O-])C[N+](C)(C)C	20	20	0.947912	0.991959	0.0227554	-0.684244	0.859438	0.0447874
	ONLI_0740	Lauroyl-L-carnitine	HILICPOS	FUJLYHJROOYKRA-QGZVFWFLSA-N	168381	CCCCCCCCCCCC(=O)O[C@H](CC(=O)[O-])C[N+](C)(C)C	20	19	0.999846	0.775249	0.755255	-0.0948359	0.926603	0.820486
	ONLI_0742	L-Cysteine-glutathione disulfide	HILICPOS	BNRXZEPOHPEEAS-PPSBICQBSA-N	53477713	C(CC(=O)N[C@@H](CSSCC(C(=O)O)N)C(=O)NCC(=O)O)[C@@H](C(=O)O)N	20	20	0.862708	0.853611	0.274528	0.343012	1.09931	0.39323
	ONLI_0744	Leu-Arg	HILICPOS	SENJXOPIZNYLHU-UHFFFAOYSA-N	3800205	CC(C)CC(C(=O)NC(CCCN=C(N)N)C(=O)O)N	20	20	0.932521	0.999452	0.879432	-0.0477789	0.989681	0.914274
	ONLI_0745	Leu-Pro	HILICPOS	VTJUNIYRYIAIHF-IUCAKERBSA-N	80817	CC(C)C[C@@H](C(=O)N1CCC[C@H]1C(=O)O)N	20	20	0.474821	0.481623	0.951484	0.0195371	0.997204	0.964666
	ONLI_0746	L-Homocitrulline	HILICPOS	XIGSAGMEBXLVJJ-YFKPBYRVSA-N	65072	C(CCNC(=O)N)C[C@@H](C(=O)O)N	20	20	0.972802	0.969823	0.0418187	-0.635545	0.844773	0.0765093
	ONLI_0747	Linoleoylcarnitine	HILICPOS	MJLXQSQYKZWZCB-DQFWFXSYSA-N	6450015	CCCCC/C=C\C/C=C\CCCCCCCC(=O)O[C@H](CC(=O)[O-])C[N+](C)(C)C	20	19	0.987164	0.45226	0.38053	-0.270024	0.863321	0.503826
	ONLI_0749	Lys-Gly	HILICPOS	HGNRJCINZYHNOU-UHFFFAOYSA-N	259320	C(CCN)CC(C(=O)NCC(=O)O)N	20	20	0.76433	0.993159	0.809231	0.0765976	1.09281	0.862822
	ONLI_0750	Lys-Val	HILICPOS	YQAIUOWPSUOINN-UHFFFAOYSA-N	140709	CC(C)C(C(=O)O)NC(=O)C(CCCCN)N	20	20	0.563145	0.719615	0.602803	0.164381	1.04955	0.700225
	ONLI_0751	N-.alpha.-Acetyl-L-arginine	HILICPOS	SNEIUMQYRCDYCH-LURJTMIESA-N	67427	CC(=O)N[C@@H](CCCN=C(N)N)C(=O)O	20	20	0.660612	0.857681	0.13374	0.474302	1.13109	0.216621
	ONLI_0752	N.alpha.-Acetyl-L-lysine	HILICPOS	VEYYWZRYIYDQJM-UHFFFAOYSA-N	192590	CC(=O)NC(CCCCN)C(=O)O	20	20	0.936489	0.965057	0.00266906	-0.857603	0.828965	0.0065109
	ONLI_0753	N.alpha.-Methyl-L-lysine	HILICPOS	OLYPWXRMOFUVGH-LURJTMIESA-N	7010497	CN[C@@H](CCCCN)C(=O)O	20	20	0.979699	0.988483	0.288502	-0.333821	0.918116	0.409601
	ONLI_0754	N-Acetyl-L-carnosine	HILICPOS	BKAYIFDRRZZKNF-SECBINFHSA-N	10221026	CC(=O)NCCC(=O)N[C@H](CC1=CN=CN1)C(=O)O	20	20	0.614276	0.737706	1.41e-08	1.46796	2.70715	1.21e-07
	ONLI_0756	N-alpha-Acetyl-L-ornithine	HILICPOS	JRLGPAXAGHMNOL-LURJTMIESA-N	439232	CC(=O)N[C@@H](CCCN)C(=O)O	20	20	0.999794	0.950603	0.0178996	-0.731498	0.847495	0.035933
	ONLI_0757	NEPSILON,NEPSILON,NEPSILON-TRIMETHYLLYSINE	HILICPOS	MXNRLFUSFKVQSK-QMMMGPOBSA-N	440120	C[N+](C)(C)CCCC[C@@H](C(=O)[O-])N	20	19	0.677193	0.66702	0.790658	0.0820952	0.966013	0.846382
	ONLI_0760	Nicotinamide riboside cation	HILICPOS	JLEBZPBDRKPWTD-TURQNECASA-O	439924	C1=CC(=C[N+](=C1)[C@H]2[C@@H]([C@@H]([C@H](O2)CO)O)O)C(=O)N	20	20	0.961189	0.999523	8.59e-05	-1.10812	0.649141	0.000291742
	ONLI_0761	O-Acetyl-L-homoserine	HILICPOS	FCXZBWSIAGGPCB-UHFFFAOYSA-N	528	CC(=O)OCCC(C(=O)O)N	20	20	0.942959	0.77133	0.899315	0.0399274	1.06724	0.928139
	ONLI_0763	Phenylacetylglutamine	HILICPOS	JFLIEFSWGNOPJJ-JTQLQIEISA-N	92258	C1=CC=C(C=C1)CC(=O)N[C@@H](CCC(=O)N)C(=O)O	20	20	0.972017	0.813242	0.342363	-0.283154	0.912126	0.462638
	ONLI_0765	Pyridoxal	HILICPOS	RADKZDMFGJYCBB-UHFFFAOYSA-N	1050	CC1=NC=C(C(=C1O)C=O)CO	20	20	0.636723	0.999909	9.13e-08	-1.42903	0.569636	6.08e-07
	ONLI_0766	Ser-Glu	HILICPOS	LAFKUZYWNCHOHT-UHFFFAOYSA-N	3613616	C(CC(=O)O)C(C(=O)O)NC(=O)C(CO)N	20	20	0.999916	0.999974	0.906377	0.0377399	1.00297	0.93089
	ONLI_0768	Ser-Lys	HILICPOS	SBMNPABNWKXNBJ-BQBZGAKWSA-N	16122513	C(CCN)C[C@@H](C(=O)O)NC(=O)[C@H](CO)N	19	20	3.78e-05	2.66e-07	0.154205	0.296362	1.20503	0.242731
	ONLI_0770	Ser-Tyr	HILICPOS	MALNXHYEPCSPPU-UHFFFAOYSA-N	4575735	C1=CC(=CC=C1CC(C(=O)O)NC(=O)C(CO)N)O	20	20	0.987445	0.992178	0.0358613	0.654154	1.30705	0.0669799
	ONLI_0772	Spermidine	HILICPOS	ATHGHQPFGPMSJY-UHFFFAOYSA-N	1102	C(CCNCCCN)CN	20	20	0.886882	0.998476	0.619846	-0.15872	0.94585	0.714865
	ONLI_0773	Stachydrine	HILICPOS	CMUNUTVVOOHQPW-LURJTMIESA-N	115244	C[N+]1(CCC[C@H]1C(=O)[O-])C	20	19	0.928866	0.767606	0.44832	-0.231893	0.89212	0.562071
	ONLI_0774	Stearoyl-L-carnitine	HILICPOS	FNPHNLNTJNMAEE-HSZRJFAPSA-N	52922056	CCCCCCCCCCCCCCCCCC(=O)O[C@H](CC(=O)[O-])C[N+](C)(C)C	20	19	0.997851	0.94015	0.116555	-0.48805	0.887907	0.191093
	ONLI_0776	Thr-Ala	HILICPOS	VPZKQTYZIVOJDV-UHFFFAOYSA-N	18218243	CC(C(C(=O)NC(C)C(=O)O)N)O	20	20	0.999471	0.999791	0.00885463	0.79167	1.16649	0.0190079
	ONLI_0780	trans-3'-Hydroxycotinine	HILICPOS	XOKCJXZZNAUIQN-IENPIDJESA-N	10219774	CN1[C@@H](CC(C1=O)O)C2=CN=CC=C2	20	20	0.974396	0.99941	0.463599	0.228082	1.15405	0.575921
	ONLI_0781	Tryptamine	HILICPOS	APJYDQYYACXCRM-UHFFFAOYSA-N	1150	C1=CC=C2C(=C1)C(=CN2)CCN	20	20	0.392136	0.832912	1.69e-09	-1.5393	0.577581	2.36e-08
	ONLI_0784	Val-Gln	HILICPOS	XXDVDTMEVBYRPK-UHFFFAOYSA-N	5253209	CC(C)C(C(=O)NC(CCC(=O)N)C(=O)O)N	20	20	7.75e-05	7.18e-06	0.857862	-0.0447912	1.01368	0.899192
	ONLI_0788	1-Methyladenosine	HILICPOS	GFYLSDSUCHVORB-IOSLPCCCSA-N	27476	CN1C=NC2=C(C1=N)N=CN2[C@H]3[C@@H]([C@@H]([C@H](O3)CO)O)O	20	19	0.999973	0.973971	0.0004898	-0.985783	0.789309	0.00141322
	ONLI_0789	1-Methylguanosine	HILICPOS	UTAIYTHAJQNQDW-KQYNXXCUSA-N	96373	CN1C(=O)C2=C(N=C1N)N(C=N2)[C@H]3[C@@H]([C@@H]([C@H](O3)CO)O)O	20	20	0.76385	0.849188	0.041659	-0.633896	0.861564	0.0763907
	ONLI_0791	3-Guanidinopropionic acid	HILICPOS	KMXXSJLYVJEBHI-UHFFFAOYSA-N	67701	C(CN=C(N)N)C(=O)O	20	20	0.919561	0.791689	0.0188672	0.70495	1.10364	0.0375943
	ONLI_0792	3-Hydroxyphenylacetic acid	HILICPOS	FVMDYYGIDFPZAX-UHFFFAOYSA-N	12122	C1=CC(=CC(=C1)O)CC(=O)O	20	20	0.200898	0.00945194	0.343477	0.276865	1.18421	0.463148
	ONLI_0793	3-Hydroxyproline	HILICPOS	BJBUEDPLEOHJGE-BKLSDQPFSA-N	150779	C1CN[C@@H](C1O)C(=O)O	20	20	0.832912	0.392136	1.7e-09	1.53904	2.02574	2.36e-08
	ONLI_0795	5-Aminovaleric acid	HILICPOS	JJMDCOVWQOJGCB-UHFFFAOYSA-N	138	C(CCN)CC(=O)O	20	20	0.653758	0.841929	0.279867	-0.344293	0.922349	0.398748
	ONLI_0798	Ala-Ile	HILICPOS	ZSOICJZJSRWNHX-UHFFFAOYSA-N	417358	CCC(C)C(C(=O)O)NC(=O)C(C)N	20	20	0.429264	0.999817	7.53e-05	-1.12565	0.49449	0.000264815
	ONLI_0799	Betaine	HILICPOS	KWIUHFFTVRNATP-UHFFFAOYSA-N	247	C[N+](C)(C)CC(=O)[O-]	20	20	0.653758	0.841929	0.279867	-0.344293	0.922349	0.398748
	ONLI_0801	Creatinine	HILICPOS	DDRJAANPRJIHGJ-UHFFFAOYSA-N	588	CN1CC(=O)N=C1N	20	20	0.987019	0.999959	0.00010594	-1.11674	0.828856	0.000349516
	ONLI_0802	Cytosine	HILICPOS	OPTASPLRGRRNAP-UHFFFAOYSA-N	597	C1=C(NC(=O)N=C1)N	20	20	0.925159	0.938004	0.0532212	-0.605029	0.781597	0.0940194
	ONLI_0803	Galactosamine	HILICPOS	MSWZFWKMSRAUBD-GASJEMHNSA-N	24154	C([C@@H]1[C@@H]([C@@H]([C@H](C(O1)O)N)O)O)O	20	20	0.959016	0.954173	0.00631684	0.732735	1.12353	0.0140471
	ONLI_0807	N2,N2-Dimethylguanosine	HILICPOS	RSPURTUNRHNVGF-IOSLPCCCSA-N	135501639	CN(C)C1=NC2=C(C(=O)N1)N=CN2[C@H]3[C@@H]([C@@H]([C@H](O3)CO)O)O	20	20	0.489683	0.893245	0.906606	-0.0376801	0.926652	0.93089
	ONLI_0808	N-Acetyl-5-hydroxytryptamine	HILICPOS	MVAWJSIDNICKHF-UHFFFAOYSA-N	903	CC(=O)NCCC1=CNC2=C1C=C(C=C2)O	20	20	0.59998	0.946611	0.525317	-0.187209	0.877245	0.636867
	ONLI_0809	N-Acetylcytidine	HILICPOS	NIDVTARKFBZMOT-PEBGCTIMSA-N	107461	CC(=O)NC1=NC(=O)N(C=C1)[C@H]2[C@@H]([C@@H]([C@H](O2)CO)O)O	20	19	0.993536	0.831527	4.12e-07	-1.34379	0.636041	2.42e-06
	ONLI_0810	N-Acetylglucosamine	HILICPOS	OVRNDRQMDRJTHS-RTRLPJTCSA-N	439174	CC(=O)N[C@@H]1[C@H]([C@@H]([C@H](OC1O)CO)O)O	20	20	0.99995	0.999282	0.0129411	0.736073	1.37397	0.0270586
	ONLI_0811	N-Acetylphenylalanine	HILICPOS	CBQJSKKFNMDLON-JTQLQIEISA-N	74839	CC(=O)N[C@@H](CC1=CC=CC=C1)C(=O)O	20	20	0.285833	0.099959	0.260554	-0.348633	0.84854	0.377882
	ONLI_0812	N-Methylleucine	HILICPOS	XJODGRWDFZVTKW-LURJTMIESA-N	2777993	CC(C)C[C@@H](C(=O)O)NC	20	20	0.97096	0.961948	0.528523	-0.201529	0.89933	0.637934
	ONLI_0813	N-Methyltyrosine	HILICPOS	MWZPENIJLUWBSY-VIFPVBQESA-N	70652	COC(=O)[C@H](CC1=CC=C(C=C1)O)N	20	20	0.868226	0.997319	0.917648	0.0316582	0.911234	0.939578
	ONLI_0814	Putrescine	HILICPOS	KIDHWZJUCRJVML-UHFFFAOYSA-N	1045	C(CCN)CN	20	20	0.977529	0.892824	0.107036	0.507623	1.12464	0.178025
	ONLI_0815	Retinoic acid	HILICPOS	SHGAZHPCJJPHSC-YCNIQYBTSA-N	444795	CC1=C(C(CCC1)(C)C)/C=C/C(=C/C=C/C(=C/C(=O)O)/C)/C	20	20	0.0694112	0.134841	0.604224	-0.158704	0.979282	0.700752
	ONLI_0816	1-Methylnicotinamide	HILICPOS	LDHMAVIPBRSVRG-UHFFFAOYSA-O	457	C[N+]1=CC=CC(=C1)C(=O)N	19	20	0.788346	0.915475	0.000141275	-1.03745	0.599064	0.000445956
	ONLI_0818	3-Ureidopropionic acid	HILICPOS	JSJWCHRYRHKBBW-UHFFFAOYSA-N	111	C(CNC(=O)N)C(=O)O	20	20	0.790862	0.538564	0.00010152	-1.04077	0.505122	0.000336311
	ONLI_0819	4-Acetamidobutyric acid	HILICPOS	UZTFMUBKZQVKLK-UHFFFAOYSA-N	18189	CC(=O)NCCCC(=O)O	20	20	0.660306	0.957226	0.422322	-0.256421	0.910503	0.543882
	ONLI_0820	4-Aminobenzoic acid	HILICPOS	ALYNCZNDIQEVRV-UHFFFAOYSA-N	978	C1=CC(=CC=C1C(=O)O)N	20	19	0.994771	0.891779	0.901489	-0.0380027	0.897692	0.928677
	ONLI_0821	4-Guanidinobutyric acid	HILICPOS	TUHVEAJXIMEOSA-UHFFFAOYSA-N	500	C(CC(=O)O)CN=C(N)N	20	20	0.797809	0.917149	0.626205	-0.155514	0.792468	0.719649
	ONLI_0822	5'-Methylthioadenosine	HILICPOS	WUUGFSXJNOTRMR-IOSLPCCCSA-N	439176	CSC[C@@H]1[C@H]([C@H]([C@@H](O1)N2C=NC3=C(N=CN=C32)N)O)O	20	20	0.861232	0.975398	0.1102	0.501702	1.17542	0.182158
	ONLI_0823	6-Methyladenosine	HILICPOS	VQAYFKKCNSOZKM-IOSLPCCCSA-N	102175	CNC1=C2C(=NC=N1)N(C=N2)[C@H]3[C@@H]([C@@H]([C@H](O3)CO)O)O	20	20	0.925739	0.999071	0.848369	-0.0603668	0.994245	0.891563
	ONLI_0824	Acetylcarnitine	HILICPOS	RDHQFKQIGNGIED-MRVPVSSYSA-N	7045767	CC(=O)O[C@H](CC(=O)[O-])C[N+](C)(C)C	20	20	0.721632	0.724006	0.0258704	-0.687051	0.918322	0.0503035
	ONLI_0825	Adenine	HILICPOS	GFFGJBXGBJISGV-UHFFFAOYSA-N	190	C1=NC2=NC=NC(=C2N1)N	20	20	0.888692	0.875028	0.0105055	0.780203	1.26805	0.022255
	ONLI_0828	Agmatine	HILICPOS	QYPPJABKJHAVHS-UHFFFAOYSA-N	199	C(CCN=C(N)N)CN	20	20	0.543205	0.909667	0.318976	-0.299822	0.911139	0.439685
	ONLI_0829	Ala-Ala	HILICPOS	DEFJQIDDEAULHB-QWWZWVQMSA-N	5460362	C[C@H](C(=O)N[C@H](C)C(=O)O)N	20	20	0.992814	0.985103	0.406502	-0.263863	0.838584	0.529506
	ONLI_0834	Anserine	HILICPOS	MYYIAHXIVFADCU-QMMMGPOBSA-N	112072	CN1C=NC=C1C[C@@H](C(=O)O)NC(=O)CCN	20	20	0.260802	0.260802	4.39e-10	1.5701	1.92097	1.21e-08
	ONLI_0835	Arginine	HILICPOS	ODKSFYDXXFIFQN-BYPYZUCNSA-N	6322	C(C[C@@H](C(=O)O)N)CN=C(N)N	20	20	0.844875	0.669996	0.00486986	-0.845537	0.864052	0.0111055
	ONLI_0836	Asparagine	HILICPOS	DCXYFEDJOCDNAF-REOHCLBHSA-N	6267	C([C@@H](C(=O)O)N)C(=O)N	20	20	0.874113	0.964948	0.541207	0.190872	1.0198	0.650256
	ONLI_0837	Aspartic acid	HILICPOS	CKLJMWTZIZZHCS-REOHCLBHSA-N	5960	C([C@@H](C(=O)O)N)C(=O)O	19	20	0.771057	0.883029	0.0420934	0.60292	1.15603	0.0768372
	ONLI_0838	Biliverdin	HILICPOS	RCNSAJSGRJSBKK-NSQVQWHSSA-N	5280353	CC\1=C(/C(=C/C2=C(C(=C(N2)/C=C\3/C(=C(C(=O)N3)C)C=C)C)CCC(=O)O)/N/C1=C\C4=NC(=O)C(=C4C)C=C)CCC(=O)O	20	20	0.949423	0.980311	0.0863683	0.513157	1.34634	0.147929
	ONLI_0839	Biotin	HILICPOS	YBJHBAHKTGYVGT-ZKWXMUAHSA-N	171548	C1[C@H]2[C@@H]([C@@H](S1)CCCCC(=O)O)NC(=O)N2	18	19	0.999991	0.0356999	0.597954	0.154274	0.900129	0.696829
	ONLI_0840	Caffeine	HILICPOS	RYYVLZVUVIJVGH-UHFFFAOYSA-N	2519	CN1C=NC2=C1C(=O)N(C(=O)N2C)C	20	20	0.834047	0.552247	0.713453	0.109267	1.00798	0.784342
	ONLI_0841	Carnitine	HILICPOS	PHIQHXFUZVPYII-ZCFIWIBFSA-N	10917	C[N+](C)(C)C[C@@H](CC(=O)[O-])O	20	20	0.36287	0.96123	0.435586	-0.24668	0.962863	0.553944
	ONLI_0843	Choline	HILICPOS	OEYIOHPDSNJKLS-UHFFFAOYSA-N	305	C[N+](C)(C)CCO	20	20	0.97533	0.979606	0.554631	-0.17974	0.941632	0.663415
	ONLI_0844	Citrulline	HILICPOS	RHGKLRLOHDJJDR-BYPYZUCNSA-N	9750	C(C[C@@H](C(=O)O)N)CNC(=O)N	20	20	0.983549	0.939222	0.00125728	-0.942837	0.795103	0.00325438
	ONLI_0845	Cotinine	HILICPOS	UIKROCXWUNQSPJ-UHFFFAOYSA-N	408	CN1C(CCC1=O)C2=CN=CC=C2	20	19	0.97019	0.981911	0.736417	0.10084	1.03435	0.804363
	ONLI_0846	Creatine	HILICPOS	CVSVTCORWBXHQV-UHFFFAOYSA-N	586	CN(CC(=O)O)C(=N)N	20	20	0.919561	0.791689	0.0188672	0.70495	1.10364	0.0375943
	ONLI_0847	Cystathionine	HILICPOS	ILRYLPWNYFXEMH-WHFBIAKZSA-N	439258	C(CSC[C@@H](C(=O)O)N)[C@@H](C(=O)O)N	20	20	0.99987	0.998951	0.457152	-0.233364	0.934519	0.570579
	ONLI_0848	DL-2-Methylglutamic acid	HILICPOS	QHSCIWIRXWFIGH-UHFFFAOYSA-N	95440	CC(CCC(=O)O)(C(=O)O)N	20	20	0.948143	0.997478	0.0082601	0.722591	1.11217	0.0178747
	ONLI_0849	Ecgonine	HILICPOS	PHMBVCPLDPDESM-RLXKETGRSA-N	443003	CN1C2CCC1[C@H]([C@H](C2)O)C(=O)O	20	20	0.923471	0.998108	0.735326	0.106983	1.18334	0.804263
	ONLI_0850	gamma-Aminobutyric Acid GABA	HILICPOS	BTCSSZJGUNDROE-UHFFFAOYSA-N	119	C(CC(=O)O)CN	20	20	0.996387	0.95015	0.00141954	-0.946445	0.7967	0.00362771
	ONLI_0851	gamma-Glutamylleucine	HILICPOS	MYFMARDICOWMQP-YUMQZZPRSA-N	151023	CC(C)C[C@@H](C(=O)O)NC(=O)CC[C@@H](C(=O)O)N	20	20	0.927012	0.957005	0.197247	0.407918	1.06018	0.298278
	ONLI_0852	gamma-Glutamylmethionine	HILICPOS	RQNSKRXMANOPQY-BQBZGAKWSA-N	7009567	CSCC[C@@H](C(=O)O)NC(=O)CC[C@@H](C(=O)O)N	20	20	0.992764	0.999924	0.426786	-0.254105	0.93264	0.547075
	ONLI_0853	Glu-Gln	HILICPOS	MGHKSHCBDXNTHX-WDSKDSINSA-N	10171586	C(CC(=O)O)[C@@H](C(=O)N[C@@H](CCC(=O)N)C(=O)O)N	20	20	0.924918	0.948738	0.280371	-0.342509	0.921718	0.39876
	ONLI_0854	Glutamic acid	HILICPOS	WHUUTDBJXJRKMK-VKHMYHEASA-N	33032	C(CC(=O)O)[C@@H](C(=O)O)N	20	20	0.999983	0.992622	1.19e-06	1.33847	1.44817	6.04e-06
	ONLI_0855	Glutamine	HILICPOS	ZDXPYRJPNDTMRX-VKHMYHEASA-N	5961	C(CC(=O)N)[C@@H](C(=O)O)N	19	19	0.695978	0.984482	2.97e-05	-1.1311	0.805469	0.000113941
	ONLI_0858	Glu-Thr	HILICPOS	JSIQVRIXMINMTA-ZDLURKLDSA-N	6998031	C[C@H]([C@@H](C(=O)O)NC(=O)[C@H](CCC(=O)O)N)O	20	20	0.466493	0.834881	0.157316	0.448064	1.09274	0.244478
	ONLI_0859	Gly-val	HILICPOS	STKYPAFSDFAEPH-UHFFFAOYSA-N	97417	CC(C)C(C(=O)O)NC(=O)CN	20	20	0.442859	0.959106	0.637947	0.150371	1.05626	0.727404
	ONLI_0860	Guanosine	HILICPOS	NYHBQMYGNKIUIF-UUOKFMHZSA-N	135398635	C1=NC2=C(N1[C@H]3[C@@H]([C@@H]([C@H](O3)CO)O)O)N=C(NC2=O)N	20	19	0.937646	0.000424971	0.000643175	0.868989	2.38124	0.00177923
	ONLI_0861	Histamine	HILICPOS	NTYJJOPFIAHURM-UHFFFAOYSA-N	774	C1=C(NC=N1)CCN	20	20	0.99113	0.994917	0.190067	-0.415074	0.80775	0.289233
	ONLI_0862	Histidine	HILICPOS	HNDVDQJCIGZPNO-YFKPBYRVSA-N	6274	C1=C(NC=N1)C[C@@H](C(=O)O)N	20	20	0.551676	0.781742	0.377004	0.282122	1.01901	0.500806
	ONLI_0863	Homoarginine	HILICPOS	QUOGESRFPZDMMT-YFKPBYRVSA-N	9085	C(CCN=C(N)N)C[C@@H](C(=O)O)N	20	20	0.31123	0.9539	3.81e-09	-1.48346	0.43668	4.26e-08
	ONLI_0864	Hypoxanthine	HILICPOS	FDGQSTZJBFJUBT-UHFFFAOYSA-N	135398638	C1=NC2=C(N1)C(=O)NC=N2	20	20	0.921976	0.805832	0.104297	0.507289	2.77731	0.174914
	ONLI_0866	Kynurenine	HILICPOS	YGPSJZOEDVAXAB-QMMMGPOBSA-N	161166	C1=CC=C(C(=C1)C(=O)C[C@@H](C(=O)O)N)N	20	20	0.577287	0.577287	9.46e-10	-1.55356	0.530392	1.69e-08
	ONLI_0867	Leucine	HILICPOS	ROHFNLRQFUQHCH-YFKPBYRVSA-N	6106	CC(C)C[C@@H](C(=O)O)N	20	20	0.976955	0.986315	0.151043	-0.452437	0.895064	0.238411
	ONLI_0871	N,N-Dimethylarginine	HILICPOS	YDGMGEXADBMOMJ-LURJTMIESA-N	123831	CN(C)C(=NCCC[C@@H](C(=O)O)N)N	20	20	0.999676	0.996044	0.00014182	-1.08387	0.79842	0.000445956
	ONLI_0872	N8-Acetylspermidine	HILICPOS	FONIWJIDLJEJTL-UHFFFAOYSA-N	123689	CC(=O)NCCCCNCCCN	19	20	0.969624	0.745863	0.00194097	-0.880262	0.76826	0.00485241
	ONLI_0873	N-Acetylalanine	HILICPOS	KTHDTJVBEPMMGL-VKHMYHEASA-N	88064	C[C@@H](C(=O)O)NC(=O)C	20	20	0.977207	0.828752	0.0158152	-0.668185	0.868847	0.032395
	ONLI_0875	N-Acetylmethionine	HILICPOS	XUYPXLNMDZIRQH-UHFFFAOYSA-N	6180	CC(=O)NC(CCSC)C(=O)O	20	20	0.86293	0.893556	0.928262	0.0276465	0.959439	0.947086
	ONLI_0876	N-Acetyltryptophan	HILICPOS	DZTHIGRZJZPRDV-LBPRGKRZSA-N	700653	CC(=O)N[C@@H](CC1=CNC2=CC=CC=C21)C(=O)O	20	20	0.929923	0.600357	0.00428946	-0.834622	0.809544	0.00989402
	ONLI_0877	Nicotinamide	HILICPOS	DFPAKSUCGFBDDF-UHFFFAOYSA-N	936	C1=CC(=CN=C1)C(=O)N	20	20	0.86269	0.780458	0.683274	-0.12931	0.964799	0.764829
	ONLI_0878	N-Methylhistidine	HILICPOS	CYZKJBZEIFWZSR-LURJTMIESA-N	90638	CN[C@@H](CC1=CN=CN1)C(=O)O	20	20	0.808239	0.610214	0.00618288	0.835852	1.17228	0.0137873
	ONLI_0879	N-Methyllysine	HILICPOS	PQNASZJZHFPQLE-LURJTMIESA-N	164795	CNCCCC[C@@H](C(=O)O)N	20	20	0.540057	0.960755	3.14e-09	-1.48047	0.5265	3.77e-08
	ONLI_0880	N-Methylproline	HILICPOS	CWLQUGTUXBXTLF-YFKPBYRVSA-N	643474	CN1CCC[C@H]1C(=O)O	20	20	0.902683	0.996307	0.00205906	0.914583	1.28715	0.00511588
	ONLI_0882	Pantothenic acid	HILICPOS	GHOKWGTUZJEAQD-ZETCQYMHSA-N	6613	CC(C)(CO)[C@H](C(=O)NCCC(=O)O)O	20	20	0.410042	0.497908	9.84e-10	-1.5387	0.532815	1.69e-08
	ONLI_0884	Pipecolic acid	HILICPOS	HXEACLLIILLPRG-UHFFFAOYSA-N	849	C1CCNC(C1)C(=O)O	19	19	0.765488	0.999527	4.38e-06	1.26185	1.96355	2.03e-05
	ONLI_0885	Proline	HILICPOS	ONIBWKKTOPOVIA-BYPYZUCNSA-N	145742	C1C[C@H](NC1)C(=O)O	20	20	0.561922	0.826436	0.763946	0.0963564	0.986119	0.826581
	ONLI_0886	Proline-hydroxyproline	HILICPOS	ONPXCLZMBSJLSP-CSMHCCOUSA-N	11902892	C1C[C@H]([NH2+]C1)C(=O)N2C[C@@H](C[C@H]2C(=O)[O-])O	20	20	0.990356	0.923017	0.575673	-0.178285	0.914316	0.679497
	ONLI_0887	Propionylcarnitine	HILICPOS	UFAHZIUFPNSHSL-UHFFFAOYSA-N	107738	CCC(=O)OC(CC(=O)[O-])C[N+](C)(C)C	20	20	0.742171	0.499288	0.144833	-0.45471	0.890849	0.231331
	ONLI_0888	Pyridoxamine	HILICPOS	NHZMQXZHNVQTQA-UHFFFAOYSA-N	1052	CC1=NC=C(C(=C1O)CN)CO	20	20	0.274086	0.754153	0.00129252	-0.937058	0.73091	0.00333486
	ONLI_0889	S-Adenosyl-homocysteine	HILICPOS	ZJUKTBDSGOFHSH-WFMPWKQPSA-N	439155	C1=NC(=C2C(=N1)N(C=N2)[C@H]3[C@@H]([C@@H]([C@H](O3)CSCC[C@@H](C(=O)O)N)O)O)N	20	20	0.850845	0.253113	0.495116	0.200713	1.10123	0.607573
	ONLI_0891	Serine	HILICPOS	MTCFGRXMJLQNBG-REOHCLBHSA-N	5951	C([C@@H](C(=O)O)N)O	20	20	0.709308	0.992636	0.398524	-0.265274	0.93837	0.520798
	ONLI_0892	Targinine	HILICPOS	NTNWOCRCBQPEKQ-YFKPBYRVSA-N	132862	CN=C(N)NCCC[C@@H](C(=O)O)N	20	20	0.312499	0.91701	0.000107758	-1.08403	0.721555	0.000351195
	ONLI_0893	Taurine	HILICPOS	XOAAWQZATWQOTB-UHFFFAOYSA-N	1123	C(CS(=O)(=O)O)N	20	20	0.260069	0.707179	0.00950617	0.791185	1.15818	0.0202446
	ONLI_0896	TMAO	HILICPOS	UYPYRKYUKCHHIB-UHFFFAOYSA-N	1145	C[N+](C)(C)[O-]	20	20	0.371751	0.371751	6.6e-10	-1.53625	0.226411	1.33e-08
	ONLI_0897	Tryptophan	HILICPOS	QIVBCDIJIAJPQS-VIFPVBQESA-N	6305	C1=CC=C2C(=C1)C(=CN2)C[C@@H](C(=O)O)N	20	20	0.839982	0.975446	7.84e-09	-1.50023	0.600305	7.33e-08
	ONLI_0899	Valine	HILICPOS	KZSNJWFQEVHDMF-BYPYZUCNSA-N	6287	CC(C)[C@@H](C(=O)O)N	20	20	0.653758	0.841929	0.279867	-0.344293	0.922349	0.398748
	ONLI_0908	10-Hydroxydecanoic acid	HILICNEG	YJCJVMMDTBEITC-UHFFFAOYSA-N	74300	C(CCCCC(=O)O)CCCCO	20	20	0.781781	0.765349	0.304818	-0.326972	0.775675	0.425265
	ONLI_0914	2,6-Dihydroxybenzoic acid	HILICNEG	AKEUNCKRJATALU-UHFFFAOYSA-N	9338	C1=CC(=C(C(=C1)O)C(=O)O)O	20	20	0.455052	0.293895	0.292039	-0.335762	0.86295	0.412271
	ONLI_0916	2-Deoxyuridine	HILICNEG	MXHRCPNRJAMMIM-SHYZEUOFSA-N	13712	C1[C@@H]([C@H](O[C@H]1N2C=CC(=O)NC2=O)CO)O	20	20	0.912347	0.569136	0.21448	-0.394493	0.802778	0.320923
	ONLI_0917	2-Hydroxy-3-methylbutyric acid	HILICNEG	NGEWQZIDQIYUNV-UHFFFAOYSA-N	99823	CC(C)C(C(=O)O)O	19	19	0.990202	0.978614	4.98e-05	-1.13189	0.673207	0.000181242
	ONLI_0918	2-Hydroxy-4-methylpentanoic acid	HILICNEG	LVRFTAZAXQPQHI-UHFFFAOYSA-N	92779	CC(C)CC(C(=O)O)O	20	19	0.284188	0.972606	0.000710923	0.986103	2.1755	0.00193998
	ONLI_0919	2-Hydroxyisobutyric acid	HILICNEG	BWLBGMIXKSTLSX-UHFFFAOYSA-N	11671	CC(C)(C(=O)O)O	20	20	0.59364	0.618501	0.844788	0.0627212	1.01517	0.891257
	ONLI_0920	2-Hydroxyquinoline	HILICNEG	LISFMEBWQUVKPJ-UHFFFAOYSA-N	6038	C1=CC=C2C(=C1)C=CC(=O)N2	20	20	0.999936	0.989807	9.39e-05	-1.10685	0.425787	0.00031506
	ONLI_0923	3-Hydroxy-4-methoxybenzoic acid	HILICNEG	LBKFGYZQBSGRHY-UHFFFAOYSA-N	12575	COC1=C(C=C(C=C1)C(=O)O)O	20	20	0.962806	0.992269	0.0246254	-0.697444	0.615771	0.0479987
	ONLI_0924	3-Hydroxyoctanoic acid	HILICNEG	NDPLAKGOSZHTPH-UHFFFAOYSA-N	26613	CCCCCC(CC(=O)O)O	20	20	0.87277	0.583698	0.050621	-0.606449	0.685951	0.0905554
	ONLI_0928	3-Methylhistidine	HILICNEG	JDHILDINMRGULE-LURJTMIESA-N	64969	CN1C=NC=C1C[C@@H](C(=O)O)N	20	20	0.932396	0.877171	0.777887	-0.0905465	0.924507	0.836548
	ONLI_0929	3-Phenyllactic acid	HILICNEG	VOXXWSYKYCBWHO-UHFFFAOYSA-N	3848	C1=CC=C(C=C1)CC(C(=O)O)O	20	20	0.78198	0.744382	0.869248	-0.0528494	0.952418	0.90876
	ONLI_0931	4-Acetylbutyric acid	HILICNEG	MGTZCLMLSSAXLD-UHFFFAOYSA-N	18407	CC(=O)CCCC(=O)O	20	20	0.995468	0.945847	0.417834	-0.25007	1.02541	0.539897
	ONLI_0932	4-Hydroxybenzoic acid	HILICNEG	FJKROLUGYXJWQN-UHFFFAOYSA-N	135	C1=CC(=CC=C1C(=O)O)O	20	20	0.944127	0.935272	0.0140306	-0.756647	0.576776	0.0291852
	ONLI_0934	4-Methylcatechol	HILICNEG	ZBCATMYQYDCTIZ-UHFFFAOYSA-N	9958	CC1=CC(=C(C=C1)O)O	19	20	0.861843	0.92999	0.938091	-0.0237936	1.04106	0.954695
	ONLI_0935	4-Pyridoxic acid	HILICNEG	HXACOUQIXZGNBF-UHFFFAOYSA-N	6723	CC1=NC=C(C(=C1O)C(=O)O)CO	20	20	0.999102	0.99964	0.000854884	-0.989196	0.596537	0.00228632
	ONLI_0936	5,8,11,14-Eicosatetraenoic acid, 16-hydroxy-, 5Z,8Z,11Z,14Z,16R-	HILICNEG	JEKNPVYFNMZRJG-STHMYGMFSA-N	9548884	CCCC[C@H](/C=C\C/C=C\C/C=C\C/C=C\CCCC(=O)O)O	20	20	0.927664	0.836647	0.371022	-0.285764	0.857763	0.494492
	ONLI_0938	6-Hydroxycaproic acid	HILICNEG	IWHLYPDWHHPVAA-UHFFFAOYSA-N	14490	C(CCC(=O)O)CCO	20	20	0.999915	0.999226	0.00055761	-1.00673	0.51016	0.00158055
	ONLI_0943	Allantoin	HILICNEG	POJWUDADGALRAB-UHFFFAOYSA-N	204	C1(C(=O)NC(=O)N1)NC(=O)N	20	20	0.994412	0.999879	0.0395821	-0.638095	0.785854	0.0730817
	ONLI_0949	Azelaic acid	HILICNEG	BDJRBEYXGGNYIS-UHFFFAOYSA-N	2266	C(CCCC(=O)O)CCCC(=O)O	20	20	0.860201	0.839115	0.289405	-0.335642	0.826409	0.410161
	ONLI_0954	Citraconic acid	HILICNEG	HNEGQIOMVPPMNR-IHWYPQMZSA-N	643798	C/C(=C/C(=O)O)/C(=O)O	20	20	0.526021	0.647735	0.880202	-0.0482593	0.846298	0.914274
	ONLI_0965	Ethyl-beta-glucuronide	HILICNEG	IWJBVMJWSPZNJH-UQGZVRACSA-N	18392195	CCO[C@H]1[C@@H]([C@H]([C@@H]([C@H](O1)C(=O)O)O)O)O	20	20	0.9154	0.442119	0.761482	-0.0971505	0.955212	0.825024
	ONLI_0966	Ferulic acid	HILICNEG	KSEBMYQBYZTDHS-HWKANZROSA-N	445858	COC1=C(C=CC(=C1)/C=C/C(=O)O)O	20	20	0.574404	0.818555	0.138619	-0.466972	0.687807	0.222874
	ONLI_0968	Galactonic acid	HILICNEG	RGHNJXZEOKUKBD-MGCNEYSASA-N	128869	C([C@H]([C@@H]([C@@H]([C@H](C(=O)O)O)O)O)O)O	20	20	0.354562	0.750967	0.0919706	-0.521457	0.810133	0.155539
	ONLI_0969	Galactose	HILICNEG	WQZGKKKJIJFFOK-FPRJBGLDSA-N	439353	C([C@@H]1[C@@H]([C@@H]([C@H]([C@@H](O1)O)O)O)O)O	19	20	0.839199	0.999867	0.595095	0.163489	0.996087	0.696829
	ONLI_0972	Gentisinic acid	HILICNEG	WXTMDXOMEHJXQO-UHFFFAOYSA-N	3469	C1=CC(=C(C=C1O)C(=O)O)O	20	20	0.438332	0.323784	0.0232584	-0.700202	0.769149	0.0454443
	ONLI_0988	Guanidinoacetic acid	HILICNEG	BPMFZUMJYQTVII-UHFFFAOYSA-N	763	C(C(=O)O)N=C(N)N	20	20	0.881733	0.726531	0.301659	-0.329303	0.852144	0.421643
	ONLI_0989	Hexanoylglycine	HILICNEG	UPCKIPHSXMXJOX-UHFFFAOYSA-N	99463	CCCCCC(=O)NCC(=O)O	19	19	0.198091	0.998562	0.00383236	0.797212	1.72078	0.00894218
	ONLI_0993	Homovanillic acid	HILICNEG	QRMZSPFSDQBLIX-UHFFFAOYSA-N	1738	COC1=C(C=CC(=C1)CC(=O)O)O	20	20	0.0832884	0.988028	0.161669	-0.425284	0.971196	0.249795
	ONLI_0995	Indole-3-carboxylic acid	HILICNEG	KMAKOBLIOCQGJP-UHFFFAOYSA-N	69867	C1=CC=C2C(=C1)C(=CN2)C(=O)O	20	20	0.763759	0.98957	0.0176588	-0.727648	0.668377	0.0355645
	ONLI_1000	Ketoisovaleric acid	HILICNEG	QHKABHOOEWYVLI-UHFFFAOYSA-N	49	CC(C)C(=O)C(=O)O	20	20	0.979856	0.841613	0.693232	-0.125343	0.94905	0.767609
	ONLI_1001	Kynurenic acid	HILICNEG	HCZHHEIFKROPDY-UHFFFAOYSA-N	3845	C1=CC=C2C(=C1)C(=O)C=C(N2)C(=O)O	20	20	0.922638	0.840847	0.870568	-0.0522602	0.926866	0.908959
	ONLI_1010	Mannitol	HILICNEG	FBPFZTCFMRRESA-KVTDHHQDSA-N	6251	C([C@H]([C@H]([C@@H]([C@@H](CO)O)O)O)O)O	20	19	0.76776	0.277244	0.306864	0.314924	0.976788	0.426642
	ONLI_1015	N-Acetylglycine	HILICNEG	OKJIRPAQVSHGFK-UHFFFAOYSA-N	10972	CC(=O)NCC(=O)O	20	19	0.884015	0.857448	0.0560512	0.563883	1.41707	0.0985179
	ONLI_1016	N-Acetylhistidine	HILICNEG	KBOJOGQFRVVWBH-UHFFFAOYSA-N	273260	CC(=O)NC(CC1=CN=CN1)C(=O)O	20	20	0.449819	0.677	0.598148	-0.168576	0.856778	0.696829
	ONLI_1017	N-Acetyl-L-tyrosine	HILICNEG	CAHKINHBCWCHCF-JTQLQIEISA-N	68310	CC(=O)N[C@@H](CC1=CC=C(C=C1)O)C(=O)O	20	20	0.952269	0.98074	0.148417	-0.4536	0.724071	0.236118
	ONLI_1021	N-epsilon-Acetyllysine	HILICNEG	DTERQYGMUDWYAZ-ZETCQYMHSA-N	92832	CC(=O)NCCCC[C@@H](C(=O)O)N	20	20	0.960775	0.994013	0.0899109	-0.534133	0.79096	0.152697
	ONLI_1022	N-Isovalerylglycine	HILICNEG	ZRQXMKMBBMNNQC-UHFFFAOYSA-N	546304	CC(C)CC(=O)NCC(=O)O	19	20	0.697627	0.843195	0.148083	0.429813	1.33099	0.236053
	ONLI_1026	Orotic acid	HILICNEG	PXQPEWDEAKTCGB-UHFFFAOYSA-N	967	C1=C(NC(=O)NC1=O)C(=O)O	20	19	0.555677	0.775816	0.000546936	0.989003	1.638	0.00156012
	ONLI_1028	Phenyl glucuronide	HILICNEG	WVHAUDNUGBNUDZ-GOVZDWNOSA-N	87235	C1=CC=C(C=C1)O[C@H]2[C@@H]([C@H]([C@@H]([C@H](O2)C(=O)O)O)O)O	20	20	0.825913	0.453111	0.510853	0.210495	1.74082	0.623086
	ONLI_1031	Phenylpyruvic acid	HILICNEG	BTNMPGBKDVTSJY-UHFFFAOYSA-N	997	C1=CC=C(C=C1)CC(=O)C(=O)O	20	20	0.45672	0.739079	0.324742	-0.313982	0.645412	0.445345
	ONLI_1038	Ser-Asn	HILICNEG	LTFSLKWFMWZEBD-UHFFFAOYSA-N	13071897	C(C(C(=O)O)NC(=O)C(CO)N)C(=O)N	20	20	0.0119968	0.0416429	0.479777	-0.203743	0.715969	0.592744
	ONLI_1041	Sorbose	HILICNEG	BJHIKXHVCXFQLS-OTWZMJIISA-N	6904	C([C@@H]([C@H]([C@@H](C(=O)CO)O)O)O)O	20	20	0.99739	0.976058	0.975714	-0.00971322	1.05933	0.984273
	ONLI_1042	S-Sulfocysteine	HILICNEG	NOKPBJYHPHHWAN-REOHCLBHSA-N	115015	C([C@@H](C(=O)O)N)SS(=O)(=O)O	19	20	0.636566	0.754693	0.437694	0.237474	1.44236	0.554387
	ONLI_1047	Theophylline	HILICNEG	ZFXYFBGIUFBOJW-UHFFFAOYSA-N	2153	CN1C2=C(C(=O)N(C1=O)C)NC=N2	20	20	0.251384	0.260447	0.750608	0.0966024	1.22108	0.81654
	ONLI_1051	Thymidine	HILICNEG	IQFYYKKMVGJFEH-XLPZGREQSA-N	5789	CC1=CN(C(=O)NC1=O)[C@H]2C[C@@H]([C@H](O2)CO)O	20	20	0.586345	0.35243	0.226772	-0.384327	0.840628	0.33619
	ONLI_1053	trans-Traumatic acid	HILICNEG	MAZWDMBCPDUFDJ-VQHVLOKHSA-N	5283028	C(CCCCC(=O)O)CCC/C=C/C(=O)O	19	20	0.766531	0.985774	0.439445	0.234256	1.30715	0.554387
	ONLI_1059	Val-Asp	HILICNEG	OBTCMSPFOITUIJ-UHFFFAOYSA-N	9964657	CC(C)C(C(=O)NC(CC(=O)O)C(=O)O)N	20	20	0.00682628	0.00303332	0.604997	0.146437	1.05852	0.700752
	ONLI_1064	corticosterone	BileAcid_Steroids	OMFXVFTZEKFJBZ-HJTSIMOOSA-N	5753	C[C@]12CCC(=O)C=C1CC[C@@H]3[C@@H]2[C@H](C[C@]4([C@H]3CC[C@@H]4C(=O)CO)C)O	19	20	0.45836	0.528931	0.114372	-0.455482	0.563396	0.188281
	ONLI_1065	progesterone	BileAcid_Steroids	RJKFOVLPORLFTN-LEKSSAKUSA-N	5994	CC(=O)[C@H]1CC[C@@H]2[C@@]1(CC[C@H]3[C@H]2CCC4=CC(=O)CC[C@]34C)C	20	20	0.000132559	0.0744031	0.00549782	-0.720537	0.320363	0.0123624
	ONLI_1069	testosterone	BileAcid_Steroids	MUMGGOZAMZWBJJ-DYKIIFRCSA-N	6013	C[C@]12CC[C@H]3[C@H]([C@@H]1CC[C@@H]2O)CCC4=CC(=O)CC[C@]34C	20	20	0.0100791		2e-05	0.927914	5.92456	7.77e-05
	ONLI_1071	cortexone	BileAcid_Steroids	ZESRJSPZRDMNHY-YFWFAHHUSA-N	6166	C[C@]12CC[C@H]3[C@H]([C@@H]1CC[C@@H]2C(=O)CO)CCC4=CC(=O)CC[C@]34C	20	20	0.0010276	0.012898	0.315539	-0.277967	0.409106	0.437947
	ONLI_1092	Tauro-omega-Muricholic acid	BileAcid_Steroids	XSOLDPYUICCHJX-SYCKBGHMSA-N	118703092	C[C@H](CCC(=O)NCCS(=O)(=O)O)[C@H]1CC[C@@H]2[C@@]1(CC[C@H]3[C@H]2[C@H]([C@@H]([C@H]4[C@@]3(CC[C@H](C4)O)C)O)O)C	20	19	0.650153	0.630713	0.000594346	-0.922579	0.526778	0.00167877
	ONLI_1093	Tauro-a-Muricholic acid	BileAcid_Steroids	DKPMWHFRUGMUKF-LPMPYYIQSA-N	53477700	C[C@H](CCC(=O)O)C1CC[C@@H]2[C@@]1(CC[C@H]3[C@H]2[C@@H]([C@H]([C@H]4[C@@]3(CC[C@H](C4)O)C)O)O)C	19	17	0.181727	0.993967	0.0559634	-0.517243	0.596862	0.0985179
	ONLI_1094	Tauro-ÃŸ-Muricholic acid	BileAcid_Steroids	XSOLDPYUICCHJX-OEYGYFRSSA-N	168408	C[C@H](CCC(=O)NCCS(=O)(=O)O)[C@H]1CCC2[C@@]1(CCC3C2[C@H]([C@H]([C@H]4[C@@]3(CC[C@H](C4)O)C)O)O)C	20	20	0.221292	0.505508	0.0617638	-0.553444	10.6223	0.108322
	ONLI_1095	Tauroursodeoxycholic acid	BileAcid_Steroids	BHTRKEVKTKCXOH-VSHSPWMTSA-N	12443252	C[C@H](CCC(=O)NCCS(=O)(=O)O)[C@H]1CC[C@@H]2[C@@]1(CC[C@H]3[C@H]2[C@H](CC4[C@@]3(CC[C@H](C4)O)C)O)C	20	20	0.00352542	0.00612976	0.032777	-0.588075	0.315041	0.0616954
	ONLI_1096	Taurocholic acid	BileAcid_Steroids	WBWWGRHZICKQGZ-HZAMXZRMSA-N	6675	C[C@H](CCC(=O)NCCS(=O)(=O)O)[C@H]1CC[C@@H]2[C@@]1([C@H](C[C@H]3[C@H]2[C@@H](C[C@H]4[C@@]3(CC[C@H](C4)O)C)O)O)C	20	19	0.870413	0.729886	0.0020326	-0.823058	0.417994	0.00506577
	ONLI_1097	omega-Muricholic acid	BileAcid_Steroids	DKPMWHFRUGMUKF-NTPBNISXSA-N	5283851	C[C@H](CCC(=O)O)[C@H]1CC[C@@H]2[C@@]1(CC[C@H]3[C@H]2[C@H]([C@@H]([C@H]4[C@@]3(CC[C@H](C4)O)C)O)O)C	20	20	0.0453151	0.135524	0.0734935	-0.523871	0.0631951	0.12778
	ONLI_1098	Glycoursodeoxycholic acid	BileAcid_Steroids	GHCZAUBVMUEKKP-XROMFQGDSA-N	12310288	C[C@H](CCC(=O)NCC(=O)O)[C@H]1CC[C@@H]2[C@@]1(CC[C@H]3[C@H]2[C@H](C[C@H]4[C@@]3(CC[C@H](C4)O)C)O)C	20	20	0.75953	0.812391	0.175049	-0.426912	0.377636	0.268408
	ONLI_1101	Glycocholic acid	BileAcid_Steroids	RFDAIACWWDREDC-FRVQLJSFSA-N	10140	C[C@H](CCC(=O)NCC(=O)O)[C@H]1CC[C@@H]2[C@@]1([C@H](C[C@H]3[C@H]2[C@@H](C[C@H]4[C@@]3(CC[C@H](C4)O)C)O)O)C	20	20	8.28e-06	0.00975091	0.00517421	-0.713395	0.252586	0.0117331
	ONLI_1102	ÃŸ-Muricholic acid	BileAcid_Steroids	DKPMWHFRUGMUKF-CRKPLTDNSA-N	5283853	C[C@H](CCC(=O)O)[C@H]1CC[C@@H]2[C@@]1(CC[C@H]3[C@H]2[C@H]([C@H]([C@H]4[C@@]3(CC[C@H](C4)O)C)O)O)C	20	20	0.193931	0.0911915	0.949623	-0.0193308	0.211363	0.964666
	ONLI_1103	Taurochenodeoxycholic acid	BileAcid_Steroids	BHTRKEVKTKCXOH-BJLOMENOSA-N	387316	C[C@H](CCC(=O)NCCS(=O)(=O)O)[C@H]1CC[C@@H]2[C@@]1(CC[C@H]3[C@H]2[C@@H](C[C@H]4[C@@]3(CC[C@H](C4)O)C)O)C	18	16	0.0252535	0.984157	0.487072	-0.194462	1.14514	0.600449
	ONLI_1104	Taurodeoxycholic acid	BileAcid_Steroids	AWDRATDZQPNJFN-VAYUFCLWSA-N	2733768	C[C@H](CCC(=O)NCCS(=O)(=O)O)[C@H]1CC[C@@H]2[C@@]1([C@H](C[C@H]3[C@H]2CC[C@H]4[C@@]3(CC[C@H](C4)O)C)O)C	20	20	0.515201	0.99393	0.744122	-0.103292	2.13607	0.810579
	ONLI_1105	Cholic acid	BileAcid_Steroids	BHQCQFFYRZLCQQ-OELDTZBJSA-N	221493	C[C@H](CCC(=O)O)[C@H]1CC[C@@H]2[C@@]1([C@H](C[C@H]3[C@H]2[C@@H](C[C@H]4[C@@]3(CC[C@H](C4)O)C)O)O)C	20	19	0.503152	0.699063	0.269688	-0.333175	0.51553	0.387677
	ONLI_1106	Ursodeoxycholic acid	BileAcid_Steroids	RUDATBOHQWOJDD-UZVSRGJWSA-N	31401	C[C@H](CCC(=O)O)[C@H]1CC[C@@H]2[C@@]1(CC[C@H]3[C@H]2[C@H](C[C@H]4[C@@]3(CC[C@H](C4)O)C)O)C	20	19	4.16e-08	0.00423404	0.0266178	-0.552454	0.981463	0.0512616
	ONLI_1108	Glycodeoxycholic acid	BileAcid_Steroids	HDZZVAMISRMYHH-UHFFFAOYSA-N	5604	C1=CN(C2=NC=NC(=C21)N)C3C(C(C(O3)CO)O)O	20	20	0.00226362	0.000782971	0.664424	-0.119597	0.926765	0.749106
	ONLI_1110	Chenodeoxycholic acid	BileAcid_Steroids	RUDATBOHQWOJDD-BSWAIDMHSA-N	10133	C[C@H](CCC(=O)O)[C@H]1CC[C@@H]2[C@@]1(CC[C@H]3[C@H]2[C@@H](C[C@H]4[C@@]3(CC[C@H](C4)O)C)O)C	20	20	0.906874	0.812803	0.00306519	-0.889076	0.345643	0.00736561
	ONLI_1111	Deoxycholic acid	BileAcid_Steroids	KXGVEGMKQFWNSR-LLQZFEROSA-N	222528	C[C@H](CCC(=O)O)[C@H]1CC[C@@H]2[C@@]1([C@H](C[C@H]3[C@H]2CC[C@H]4[C@@]3(CC[C@H](C4)O)C)O)C	20	20	0.336206	0.984095	0.385121	-0.260629	0.805153	0.509068
	ONLI_1125	TXB2	Oxylipins	XNRNNGPBEPRNAR-JQBLCGNGSA-N	5283137	CCCCC[C@@H](/C=C/[C@@H]1[C@H]([C@H](CC(O1)O)O)C/C=C\CCCC(=O)O)O	20	20	0.644893	0.278491	0.629225	0.142742	1.27054	0.721547
	ONLI_1129	PGD2	Oxylipins	BHMBVRSPMRCCGG-OUTUXVNYSA-N	448457	CCCCC[C@@H](/C=C/[C@@H]1[C@H]([C@H](CC1=O)O)C/C=C\CCCC(=O)O)O	20	20	3.3e-05	0.00293066	0.448958	-0.203159	1.09693	0.562071
	ONLI_1133	PGE3	Oxylipins	CBOMORHDRONZRN-QLOYDKTKSA-N	5280937	CC/C=C\C[C@@H](/C=C/[C@H]1[C@@H](CC(=O)[C@@H]1C/C=C\CCCC(=O)O)O)O	20	20	3.81e-05	0.000139508	0.429799	-0.199556	0.533278	0.5496
	ONLI_1134	PGF3alpha	Oxylipins	SAKGBZWJAIABSY-SAMSIYEGSA-N	5280940	CC/C=C\C[C@@H](/C=C/[C@H]1[C@@H](C[C@@H]([C@@H]1C/C=C\CCCC(=O)O)O)O)O	20	19	5.28e-09	0.00742134	0.0035026	-0.709734	0.597791	0.0082686
	ONLI_1135	9,12,13-TriHOME	Oxylipins	MDIUMSLCYIJBQC-MVFSOIOZSA-N	9858729	CCCCC[C@@H]([C@H](/C=C/[C@H](CCCCCCCC(=O)O)O)O)O	20	20	0.853786	0.90125	0.712495	0.114026	0.981116	0.784342
	ONLI_1138	9,10-e-DiHO	Oxylipins	VACHUYIREGFMSP-SJORKVTESA-N	441460	CCCCCCCC[C@H]([C@H](CCCCCCCC(=O)O)O)O	20	20	0.708401	0.97788	0.691134	0.125509	0.887884	0.767398
	ONLI_1139	12_13-DiHOME	Oxylipins	CQSLTKIXAJTQGA-FLIBITNWSA-N	10236635	CCCCCC(C(C/C=C\CCCCCCCC(=O)O)O)O	20	20	0.989423	0.974759	0.902144	0.0379881	1.04197	0.928677
	ONLI_1140	9,10-DiHOME	Oxylipins	XEBKSQSGNGRGDW-YFHOEESVSA-N	9966640	CCCCC/C=C\CC(C(CCCCCCCC(=O)O)O)O	19	20	0.799218	0.722657	0.476965	-0.206703	0.926281	0.590702
	ONLI_1141	15,16-DiHODE	Oxylipins	LKLLJYJTYPVCID-OHPMOLHNSA-N	16061068	CCC(C(C/C=C\C/C=C\CCCCCCCC(=O)O)O)O	20	20	0.531591	0.861967	0.38898	0.268809	1.03196	0.512581
	ONLI_1142	12,13-DiHODE	Oxylipins	RGRKFKRAFZJQMS-OOHFSOINSA-N	16061067	CC/C=C\CC(C(C/C=C\CCCCCCCC(=O)O)O)O	19	20	0.582414	0.667819	0.111741	0.468937	1.2034	0.184327
	ONLI_1143	9,10-DiHODE	Oxylipins	QRHSEDZBZMZPOA-ZJSQCTGTSA-N	16061066	CC/C=C\C/C=C\CC(C(CCCCCCCC(=O)O)O)O	20	20	0.726325	0.975783	0.769129	0.0926132	0.934829	0.831072
	ONLI_1144	14,15-DiHETrE	Oxylipins	SYAWGTIVOGUZMM-ILYOTBPNSA-N	5283147	CCCCCC(C(C/C=C\C/C=C\C/C=C\CCCC(=O)O)O)O	20	20	0.997748	0.996027	0.0405285	-0.631138	0.809796	0.0744873
	ONLI_1145	11,12-DiHETrE	Oxylipins	LRPPQRCHCPFBPE-KROJNAHFSA-N	5283146	CCCCC/C=C\CC(C(C/C=C\C/C=C\CCCC(=O)O)O)O	20	20	0.731676	0.957931	0.000317027	-1.04666	0.678491	0.000945211
	ONLI_1146	8,9-DiHETrE	Oxylipins	DCJBINATHQHPKO-TYAUOURKSA-N	5283144	CCCCC/C=C\C/C=C\CC(C(C/C=C\CCCC(=O)O)O)O	20	20	0.999398	0.996744	2.01e-06	-1.28009	0.631389	9.82e-06
	ONLI_1147	5,6-DiHETrE	Oxylipins	GFNYAPAJUNPMGH-QNEBEIHSSA-N	5283142	CCCCC/C=C\C/C=C\C/C=C\CC(C(CCCC(=O)O)O)O	20	20	0.989298	0.991871	4.25e-06	-1.26792	0.627774	1.98e-05
	ONLI_1148	17,18-DiHETE	Oxylipins	XYDVGNAQQFWZEF-JPURVOHMSA-N	16061120	CCC(C(C/C=C\C/C=C\C/C=C\C/C=C\CCCC(=O)O)O)O	20	20	0.999979	0.997406	0.0379009	-0.647386	0.803903	0.0706256
	ONLI_1149	14,15-DiHETE	Oxylipins	BLWCDFIELVFRJY-QXBXTPPVSA-N	16061119	CC/C=C\CC(C(C/C=C\C/C=C\C/C=C\CCCC(=O)O)O)O	20	20	0.975542	0.881759	0.397087	-0.270608	0.922003	0.519764
	ONLI_1150	19,20-DiHDPE	Oxylipins	FFXKPSNQCPNORO-MBYQGORISA-N	16061148	CCC(C(C/C=C\C/C=C\C/C=C\C/C=C\C/C=C\CCC(=O)O)O)O	20	20	0.821294	0.978112	0.0176718	-0.732107	0.787143	0.0355645
	ONLI_1153	6-trans-LTB4	Oxylipins	VNYSSYRCGWBHLG-UKNWISKWSA-N	5283128	CCCCC/C=C\C[C@H](/C=C/C=C/C=C/[C@H](CCCC(=O)O)O)O	20	20	3.24e-05	2.76e-05	0.951259	0.0154529	1.04835	0.964666
	ONLI_1156	13S-HODE	Oxylipins	HNICUWMFWZBIFP-IRQZEAMPSA-N	6443013	CCCCC[C@@H](/C=C/C=C\CCCCCCCC(=O)O)O	20	20	0.955015	0.907962	0.290491	0.299048	1.26238	0.410976
	ONLI_1157	9-HODE	Oxylipins	NPDSHTNEKLQQIJ-SIGMCMEVSA-N	5282945	CCCCC/C=C/C=C/C(CCCCCCCC(=O)O)O	20	19	0.923708	0.897957	0.958745	0.0162354	0.884691	0.969585
	ONLI_1158	13-HOTE	Oxylipins	KLLGGGQNRTVBSU-JDTPQGGVSA-N	10469728	CC/C=C\CC(/C=C/C=C\CCCCCCCC(=O)O)O	20	20	0.493428	0.615624	0.0143507	0.663985	1.67881	0.0296214
	ONLI_1159	9-HOTE	Oxylipins	YUPHIKSLGBATJK-OBKPXJAFSA-N	53480359	CC/C=C\CC/C=C/C=C(\CCCCCCCC(=O)O)/O	20	20	0.957264	0.999883	0.844574	0.0615117	0.938214	0.891257
	ONLI_1161	15-HETE	Oxylipins	JSFATNQSLKRBCI-VAEKSGALSA-N	5280724	CCCCC[C@@H](/C=C/C=C\C/C=C\C/C=C\CCCC(=O)O)O	20	20	0.837327	0.60411	0.457172	-0.221648	1.13644	0.570579
	ONLI_1162	12S-HETE	Oxylipins	ZNHVWPKMFKADKW-LQWMCKPYSA-N	5283155	CCCCC/C=C\C[C@@H](/C=C/C=C\C/C=C\CCCC(=O)O)O	20	20	0.983343	0.997757	0.933381	-0.0241258	1.61081	0.951103
	ONLI_1163	8S-HETE	Oxylipins	NLUNAYAEIJYXRB-VYOQERLCSA-N	5283154	CCCCC/C=C\C/C=C\C=C\[C@H](C/C=C\CCCC(=O)O)O	20	20	0.742989	0.817928	0.0294858	-0.638818	0.729191	0.0561609
	ONLI_1164	11-HETE	Oxylipins	GCZRCCHPLVMMJE-RSPKXIRXSA-N	5312981	CCCCC/C=C\C=C/[C@@H](C/C=C\C/C=C/CCCC(=O)O)O	20	20	0.84853	0.381159	0.234672	-0.368425	1.18391	0.346625
	ONLI_1165	9-HETE	Oxylipins	KATOYYZUTNAWSA-DLJQHUEDSA-N	5312978	CCCCC/C=C\C/C=C\CC(/C=C\C=C\CCCC(=O)O)O	20	20	0.0953683	0.999748	0.0516674	-0.582866	0.809264	0.0920182
	ONLI_1166	5-HETE	Oxylipins	KGIJOOYOSFUGPC-JGKLHWIESA-N	5280733	CCCCC/C=C\C/C=C\C/C=C\C=C\[C@H](CCCC(=O)O)O	20	20	0.997938	0.98101	0.623226	-0.157262	0.966654	0.717735
	ONLI_1167	15-HEPE	Oxylipins	UDXLGBLAJBYLSZ-XBCQTNLFSA-N	53480357	CC/C=C\C(C/C=C/C=C\C/C=C\C/C=C\CCCC(=O)O)O	20	20	0.00146751	9.87e-05	0.270644	0.284162	1.57016	0.388357
	ONLI_1168	12S-HEPE	Oxylipins	MCRJLMXYVFDXLS-QGQBRVLBSA-N	10041593	CC/C=C\C/C=C\CC(/C=C/C=C\C/C=C\CCCC(=O)O)O	20	20	0.964122	0.978277	0.197494	0.383203	1.87263	0.298278
	ONLI_1170	5S-HEPE	Oxylipins	FTAGQROYQYQRHF-FCWZHQICSA-N	6439678	CC/C=C\C/C=C\C/C=C\C/C=C\C=C\C(CCCC(=O)O)O	20	20	0.0445349	0.576235	0.342524	-0.287075	0.852622	0.462638
	ONLI_1171	17-HDoHE	Oxylipins	SWTYBBUBEPPYCX-VIIQGJSXSA-N	6439179	CC/C=C\CC(/C=C/C=C\C/C=C\C/C=C\C/C=C\CCC(=O)O)O	20	20	0.0973755	0.450954	0.878583	0.044829	1.55274	0.914274
	ONLI_1172	14-HDoHE	Oxylipins	ZNEBXONKCYFJAF-BGKMTWLOSA-N	11566378	CC/C=C\C/C=C\CC(/C=C/C=C\C/C=C\C/C=C\CCC(=O)O)O	20	20	0.960482	0.830435	0.979987	0.00754448	1.58672	0.986112
	ONLI_1173	4-HDoHE	Oxylipins	IFRKCNPQVIJFAQ-PQVBWYSWSA-N	14429109	CC/C=C\C/C=C\C/C=C\C/C=C\C/C=C\C=C\C(CCC(=O)O)O	20	20	0.998484	0.98	0.328266	0.299918	1.24241	0.448649
	ONLI_1174	13-KODE	Oxylipins	JHXAZBBVQSRKJR-BSZOFBHHSA-N	6446027	CCCCCC(=O)/C=C/C=C\CCCCCCCC(=O)O	20	20	0.000400655	0.000348728	0.574266	0.132959	1.03005	0.678832
	ONLI_1175	9-KODE	Oxylipins	LUZSWWYKKLTDHU-ZJHFMPGASA-N	9839084	CCCCC/C=C\C=C\C(=O)CCCCCCCC(=O)O	20	20	0.779995	0.694324	0.353882	-0.295932	0.783517	0.474635
	ONLI_1176	15-KETE	Oxylipins	YGJTUEISKATQSM-USWFWKISSA-N	5280701	CCCCCC(=O)/C=C/C=C\C/C=C\C/C=C\CCCC(=O)O	20	20	4.21e-05	4.18e-05	0.663522	-0.107765	0.92	0.749106
	ONLI_1179	1213Ep-9-KODE	Oxylipins	RCMABBHQYMBYKV-BUHFOSPRSA-N	5283007	CCCCCC1C(O1)/C=C/C(=O)CCCCCCCC(=O)O	20	20	0.071888	0.00325426	0.639617	-0.131154	0.531294	0.728277
	ONLI_1180	1213-EpOME	Oxylipins	CCPPLLJZDQAOHD-FLIBITNWSA-N	5356421	CCCCCC1C(O1)C/C=C\CCCCCCCC(=O)O	20	20	0.961719	0.999306	0.430804	-0.25162	0.929344	0.5496
	ONLI_1181	910-EpOME	Oxylipins	FBUKMFOXMZRGRB-YFHOEESVSA-N	6246154	CCCCC/C=C\CC1C(O1)CCCCCCCC(=O)O	20	20	0.985535	0.978185	0.0911011	-0.523089	0.823777	0.154392
	ONLI_1182	15,16-EpODE	Oxylipins	HKSDVVJONLXYKL-OHPMOLHNSA-N	16061062	CCC1C(O1)C/C=C\C/C=C\CCCCCCCC(=O)O	20	19	0.833772	0.756155	0.377715	-0.269708	0.909712	0.500923
	ONLI_1184	alpha-12(13)-EpODE	Oxylipins	BKKGUKSHPCTUGE-OOHFSOINSA-N	16061061	CC/C=C\CC1C(O1)C/C=C\CCCCCCCC(=O)O	19	18	0.268446	0.593563	0.988015	0.00433767	1.00318	0.990703
	ONLI_1186	11,12-EpETrE	Oxylipins	DXOYQVHGIODESM-IQCOFVSKSA-N	53480479	CCCCC/C=C/CC1C(O1)C/C=C\C/C=C/CCCC(=O)O	20	20	0.990794	0.65092	1.6e-08	-1.4536	0.423984	1.33e-07
	ONLI_1187	89-EpETrE	Oxylipins	DBWQSCSXHFNTMO-TYAUOURKSA-N	5283203	CCCCC/C=C\C/C=C\CC1C(O1)C/C=C\CCCC(=O)O	20	20	0.984419	0.746914	1.91e-07	-1.39696	0.459791	1.17e-06
	ONLI_1188	1718-EpETE	Oxylipins	GPQVVJQEBXAKBJ-JPURVOHMSA-N	16061089	CCC1C(O1)C/C=C\C/C=C\C/C=C\C/C=C\CCCC(=O)O	19	20	0.00645522	0.618995	0.296809	-0.293517	0.803891	0.417711
	ONLI_1198	10-Nitrooleate	Oxylipins	WRADPCFZZWXOTI-BMRADRMJSA-N	24836820	CCCCCCCC/C(=C\CCCCCCCC(=O)O)/[N+](=O)[O-]	20	20	0.768314	0.976777	0.108942	0.49992	1.21088	0.180449
	ONLI_1200	10-Nitrolinoleate	Oxylipins	LELVHAQTWXTCLY-XYWKCAQWSA-N	5282259	CCCCC/C=C\C/C(=C\CCCCCCCC(=O)O)/[N+](=O)[O-]	19	20	0.00014912	1.34e-06	0.154986	0.330232	1.41795	0.242731
