# Supplementary material for: Sexual Dimorphism of the Mouse Plasma Metabolome Is Associated with Phenotypes of 30 Gene Knockout Lines
Source: Metabolites. 2023 Aug 15;13(8):947. doi: 10.3390/metabo13080947 (PMC10456929; doi:10.3390/metabo13080947)
Supplement: Supplementary file 1 [file metabolites-13-00947-s001.zip › Supplementary Data S4_WT phenotype data_Zhang et al_KOMP_08-2023.xlsx]

## Sheet: read_me
Sexual Dimorphism of the Mouse Plasma Metabolome Is Associated with Phenotypes of 30 Gene Knockout Lines
Ying Zhang 1,2, Dinesh K. Barupal 3, Sili Fan 1, Bei Gao 4, Chao Zhu 5, Ann M. Flenniken 6,7, Colin McKerlie 6,8, Lauryl M. J. Nutter 6,8, Kevin C. Kent Lloyd 9 and Oliver Fiehn 1,*
1	West Coast Metabolomics Center, University of California Davis, Davis, CA 95616, USA; ofiehn@ucdavis.edu (O.F.) ythzhang@ucdavis.edu (Y.Z.); slfan@ucdavis.edu (S.F.)
2	Department of Chemistry, University of California, Davis, Davis, CA 95616, USA
3	Department of Environmental Medicine and Public Health, Icahn School of Medicine at Mount Sinai, New York, NY 10029, USA; dinesh.barupal@mssm.edu
4	School of Marine Sciences, Nanjing University of Information Science and Technology,Nanjing 210044, China; wintergb2012@gmail.com
5	College of Medicine & Nursing, Dezhou University, Dezhou 253023, China; zhuchao@dzu.edu.cn
6	The Centre for Phenogenomics, Toronto, ON M5T 3H7, Canada; flenniken@lunenfeld.ca (A.M.F.); colin.mckerlie@sickkids.ca (C.M.); lauryl.nutter@sickkids.ca (L.M.J.N.)
7	Lunenfeld-Tanenbaum Research Institute, Mount Sinai Hospital, Toronto, ON M5G 1X5, Canada
8	The Hospital for Sick Children, Toronto, ON M5G 1X8, Canada
9	Department of Surgery, School of Medicine, and Mouse Biology Program, University of California, Davis, Davis, CA 95616, USA; kclloyd@ucdavis.edu
	*Correspondence: ofiehn@ucdavis.edu
Spreadsheet	Output
1_no bodyweight adjusted	Sex as a Biological Variable in IMPC Phenotype Data for Wildtype Mice
2_after bw adjusted	Sex as a Biological variable in IMPC Phenotype Data with Bodyweight as a Confounder for wildtype Mice.
Note: fold change calculations used female mice as reference, coefficient > 0 or foldchange >1 means higher metabolite levels in male WT mice

## Sheet: 1_no bodyweight adjusted
	SI Data 4a. Sex as a Biological Variable in IMPC Phenotype Data for Wildtype Mice.
long column names	label	Procedure name	Parameter name	# of female WT mice	# of male WT mice	Normality of female WT mice after data transformation	Normality of male WT mice after data transformation	p value Male vs. Female	estimate of WT Male vs. Female	foldchange WT male vs. female	adjusted p value	comment of row3
short column names	label	Procedure name	Parameter name	F_Count	M_Count	Normality_F	Normality_M	p_value	coefficient	fold_change	adjusted_p_value
	IMPC_ABR_001_001	Auditory Brain Stem Response	Body weight	8	8	0.926463	0.975579	0.000198383	1.47737	1.21444	0.00109662
	IMPC_ABR_002_001	Auditory Brain Stem Response	Click-evoked ABR threshold	7	5					1
	IMPC_ABR_004_001	Auditory Brain Stem Response	6kHz-evoked ABR Threshold	7	8	0.00149744	0.00318206	0.571596	-0.23994	0.932065	0.789915
	IMPC_ABR_006_001	Auditory Brain Stem Response	12kHz-evoked ABR Threshold	8	8	0.0271619	0.0554068	0.106495	0.660899	1.17241	0.329757
	IMPC_ABR_008_001	Auditory Brain Stem Response	18kHz-evoked ABR Threshold	8	8	6.32e-05	0.0270816	0.254051	0.436495	1.08824	0.543615
	IMPC_ABR_010_001	Auditory Brain Stem Response	24kHz-evoked ABR Threshold	8	8	0.000479057	0.33159	0.521083	-0.284592	0.955556	0.756901
	IMPC_ABR_012_001	Auditory Brain Stem Response	30kHz-evoked ABR Threshold	8	8	0.291064	0.843664	0.346855	-0.454437	0.875	0.62184
	IMPC_ACS_001_001	Acoustic Startle and Pre-pulse Inhibition (PPI)	Response amplitude - BN	20	19	0.998913	0.998755	0.0847507	0.5373	1.21664	0.285854
	IMPC_ACS_002_001	Acoustic Startle and Pre-pulse Inhibition (PPI)	Response amplitude - PP1	20	18	0.841773	0.864456	0.56004	0.187983	1.02835	0.788439
	IMPC_ACS_003_001	Acoustic Startle and Pre-pulse Inhibition (PPI)	Response amplitude - PP2	18	19	0.957397	0.554865	0.0159272	0.756313	1.30186	0.0704337
	IMPC_ACS_004_001	Acoustic Startle and Pre-pulse Inhibition (PPI)	Response amplitude - PP3	20	19	0.996332	0.965236	0.15218	0.447054	1.14764	0.407776
	IMPC_ACS_005_001	Acoustic Startle and Pre-pulse Inhibition (PPI)	Response amplitude - PP4	20	20	0.813344	0.648824	0.73515	0.106599	1.06617	0.855526
	IMPC_ACS_006_001	Acoustic Startle and Pre-pulse Inhibition (PPI)	Response amplitude - S	18	20	0.462109	0.978604	0.30742	0.328383	1.3338	0.584526
	IMPC_ACS_007_001	Acoustic Startle and Pre-pulse Inhibition (PPI)	Response amplitude - PP1_S	20	20	0.997229	0.932588	0.664994	0.136391	1.09878	0.816875
	IMPC_ACS_008_001	Acoustic Startle and Pre-pulse Inhibition (PPI)	Response amplitude - PP2_S	18	20	0.616169	0.737921	0.721895	-0.115175	0.994232	0.850042
	IMPC_ACS_009_001	Acoustic Startle and Pre-pulse Inhibition (PPI)	Response amplitude - PP3_S	18	19	0.919461	0.907031	0.931248	-0.0282907	1.06749	0.97536
	IMPC_ACS_010_001	Acoustic Startle and Pre-pulse Inhibition (PPI)	Response amplitude - PP4_S	19	19	0.854389	0.903272	0.838404	0.0659227	0.943315	0.921781
	IMPC_ACS_033_001	Acoustic Startle and Pre-pulse Inhibition (PPI)	% Pre-pulse inhibition - PPI1	18	20	0.957883	0.999398	0.308418	-0.327716	0.723024	0.584526
	IMPC_ACS_034_001	Acoustic Startle and Pre-pulse Inhibition (PPI)	% Pre-pulse inhibition - PPI2	19	20	0.867643	0.99639	0.0908797	0.529865	1.29011	0.296318
	IMPC_ACS_035_001	Acoustic Startle and Pre-pulse Inhibition (PPI)	% Pre-pulse inhibition - PPI3	20	20	0.907447	0.798011	0.570047	0.178758	1.19962	0.789915
	IMPC_ACS_036_001	Acoustic Startle and Pre-pulse Inhibition (PPI)	% Pre-pulse inhibition - PPI4	20	18	0.884234	0.996188	0.0918822	0.535527	1.08295	0.296318
	IMPC_ACS_037_001	Acoustic Startle and Pre-pulse Inhibition (PPI)	% Pre-pulse inhibition - Global	19	20	0.729886	0.719618	0.440263	0.245611	1.13643	0.695337
	IMPC_BWT_001_001	Body Weight	Body weight	19	20	0.538577	0.781876	0.0443934	0.625004	1.0854	0.176686
	IMPC_BWT_008_001-10	Body Weight	Body weight curve	16	18	0.891233	0.955754	1.12e-07	1.47866	1.25086	1.38e-06
	IMPC_BWT_008_001-11	Body Weight	Body weight curve	18	18	0.99414	0.626678	3.27e-08	1.48798	1.23941	5.92e-07
	IMPC_BWT_008_001-12	Body Weight	Body weight curve	10	12	0.601	0.642401	4.18e-06	1.53926	1.27502	3.47e-05
	IMPC_BWT_008_001-13	Body Weight	Body weight curve	17	20	0.991141	0.850226	1.55e-07	1.42875	1.21183	1.71e-06
	IMPC_BWT_008_001-14	Body Weight	Body weight curve	13	16	0.817186	0.943747	8.01e-07	1.48459	1.24904	7.59e-06
	IMPC_BWT_008_001-15	Body Weight	Body weight curve	16	16	0.941771	0.855322	1.18e-07	1.49881	1.25351	1.38e-06
	IMPC_BWT_008_001-16	Body Weight	Body weight curve	16	14	1	0.957187	4.38e-06	1.40221	1.21126	3.49e-05
	IMPC_BWT_008_001-4	Body Weight	Body weight curve	16	18	0.606465	0.842735	0.00395106	0.926519	1.15366	0.0187205
	IMPC_BWT_008_001-5	Body Weight	Body weight curve	16	18	0.553417	0.489666	9.28e-09	1.54767	1.22277	3.55e-07
	IMPC_BWT_008_001-6	Body Weight	Body weight curve	17	18	0.511854	0.495662	5.41e-09	1.54963	1.25241	2.69e-07
	IMPC_BWT_008_001-7	Body Weight	Body weight curve	13	17	0.719883	0.621783	1.05e-07	1.5456	1.26446	1.38e-06
	IMPC_BWT_008_001-8	Body Weight	Body weight curve	13	16	0.900157	0.699269	2.36e-07	1.52971	1.29226	2.35e-06
	IMPC_BWT_008_001-9	Body Weight	Body weight curve	18	17	0.987278	0.765819	7.8e-08	1.47505	1.24105	1.19e-06
	IMPC_CAL_001_001	Indirect Calorimetry	Body weight before experiment	18	17	0.838537	0.726745	2.5e-08	1.5083	1.24153	5.52e-07
	IMPC_CAL_002_001	Indirect Calorimetry	Body weight after experiment	15	17	0.493018	0.991864	1.64e-07	1.49403	1.2495	1.71e-06
	IMPC_CAL_008_001	Indirect Calorimetry	Total food intake	6	5	0.870225	0.842856	0.332389	0.58418	1.1499	0.606839
	IMPC_CAL_017_001	Indirect Calorimetry	Respiratory Exchange Ratio	18	17	0.923243	0.644789	0.387032	0.290271	1.00992	0.658285
	IMPC_CBC_001_001	Clinical Chemistry	Sodium	20	19	0.876327	0.730617	0.0938072	0.522305	1.01029	0.296318
	IMPC_CBC_002_001	Clinical Chemistry	Potassium	20	20	0.562415	0.815361	0.219658	0.383033	1.03066	0.487361
	IMPC_CBC_003_001	Clinical Chemistry	Chloride	20	20	0.997177	0.999723	0.287748	-0.332045	0.992395	0.578403
	IMPC_CBC_004_001	Clinical Chemistry	Urea (Blood Urea Nitrogen - BUN)	19	20	0.972174	0.997994	0.30719	0.323817	1.05008	0.584526
	IMPC_CBC_005_001	Clinical Chemistry	Creatinine	20	19	0.711525	0.433968	0.329515	-0.309573	0.947794	0.606839
	IMPC_CBC_006_001	Clinical Chemistry	Total protein	20	20	0.323326	0.900868	0.694763	0.123118	1.00781	0.822963
	IMPC_CBC_007_001	Clinical Chemistry	Albumin	19	20	0.403551	0.633592	1.99e-05	-1.20778	0.931589	0.000127866
	IMPC_CBC_008_001	Clinical Chemistry	Total bilirubin	16	20	0.240268	0.294588	0.613514	0.162255	1.02273	0.802515
	IMPC_CBC_009_001	Clinical Chemistry	Calcium	19	20	0.890177	0.859981	0.328381	0.310231	1.0109	0.606839
	IMPC_CBC_010_001	Clinical Chemistry	Phosphorus	19	20	0.709059	0.814013	0.637173	-0.15032	0.979531	0.802515
	IMPC_CBC_012_001	Clinical Chemistry	Aspartate aminotransferase	19	19	0.557663	0.972172	0.220415	-0.392453	0.984059	0.487361
	IMPC_CBC_013_001	Clinical Chemistry	Alanine aminotransferase	18	19	0.967876	0.998456	0.0227796	0.719672	1.31921	0.0944406
	IMPC_CBC_014_001	Clinical Chemistry	Alkaline phosphatase	18	20	0.295078	0.286895	8.36e-10	-1.56108	0.623296	1.66e-07
	IMPC_CBC_015_001	Clinical Chemistry	Total cholesterol	19	19	0.834882	0.999998	1.37e-06	1.33724	1.20865	1.24e-05
	IMPC_CBC_016_001	Clinical Chemistry	HDL-cholesterol	19	18	0.635747	0.654424	3.39e-09	1.53772	1.3588	2.69e-07
	IMPC_CBC_999_999	Clinical Chemistry	Non-HDL-cholesterol	20	20	0.481222	0.832711	0.0938091	0.518713	1.08046	0.296318
	IMPC_CBC_017_001	Clinical Chemistry	Triglycerides	20	19	0.393795	0.939675	0.000978421	0.979474	1.37061	0.00512384
	IMPC_CBC_018_001	Clinical Chemistry	Glucose	20	20	0.977507	0.873493	0.00351806	0.870283	1.10548	0.0170755
	IMPC_CBC_058_001	Clinical Chemistry	Cholesterol ratio	20	19	0.999995	0.795445	6.65e-06	-1.26049	0.902979	4.8e-05
	IMPC_CSD_032_001	Combined SHIRPA and Dysmorphology	Locomotor activity	19	19	0.460607	0.984783	0.462659	0.23516	1.06321	0.713714
	IMPC_DXA_001_001	Body Composition (DEXA lean/fat)	Body weight	18	19	0.93398	0.942738	9.93e-08	1.43984	1.22742	1.38e-06
	IMPC_DXA_002_001	Body Composition (DEXA lean/fat)	Fat mass	17	18	0.582203	0.576041	0.000225133	1.11841	1.28508	0.00121085
	IMPC_DXA_003_001	Body Composition (DEXA lean/fat)	Lean mass	18	19	0.749256	0.955067	1.07e-08	1.50766	1.25344	3.55e-07
	IMPC_DXA_004_001	Body Composition (DEXA lean/fat)	Bone Mineral Density (excluding skull)	18	19	0.299756	0.525395	0.11804	0.502791	1.02404	0.350596
	IMPC_DXA_005_001	Body Composition (DEXA lean/fat)	Bone Mineral Content (excluding skull)	17	19	0.898799	0.407524	0.0803057	0.569519	1.06308	0.275558
	IMPC_DXA_006_001	Body Composition (DEXA lean/fat)	Body length	18	19	0.339142	0.833295	7.39e-06	1.2543	1.04521	5.07e-05
	IMPC_DXA_007_001	Body Composition (DEXA lean/fat)	BMC/Body weight	18	19	0.910129	0.541256	1.87e-05	-1.23674	0.86794	0.000124294
	IMPC_DXA_008_001	Body Composition (DEXA lean/fat)	Lean/Body weight	18	19	0.847982	0.828802	0.302326	0.335851	1.0177	0.584526
	IMPC_DXA_009_001	Body Composition (DEXA lean/fat)	Fat/Body weight	17	18	0.739286	0.974943	0.410968	0.275947	1.04783	0.662309
	IMPC_DXA_010_001	Body Composition (DEXA lean/fat)	Bone Area	17	19	0.848638	0.738993	0.0475719	0.641057	1.03781	0.182054
	IMPC_ECG_001_001	Electrocardiogram (ECG)	Number of signals	20	19	0.873169	0.925354	0.456987	-0.235384	0.927061	0.710472
	IMPC_ECG_002_001	Electrocardiogram (ECG)	HR	20	20	0.866726	0.942704	0.386648	-0.271497	0.987921	0.658285
	IMPC_ECG_003_001	Electrocardiogram (ECG)	CV	18	20	0.665871	0.750105	0.930416	-0.0282822	1.01843	0.97536
	IMPC_ECG_004_001	Electrocardiogram (ECG)	RR	20	20	0.851337	0.940709	0.345987	0.29531	1.01365	0.62184
	IMPC_ECG_005_001	Electrocardiogram (ECG)	PQ	20	20	0.769917	0.918461	0.635751	-0.148647	0.985789	0.802515
	IMPC_ECG_006_001	Electrocardiogram (ECG)	PR	20	20	0.993563	0.99231	0.92141	-0.0311139	1.00186	0.975322
	IMPC_ECG_007_001	Electrocardiogram (ECG)	QRS	20	20	0.990366	0.872678	0.410756	0.25748	1.02096	0.662309
	IMPC_ECG_008_001	Electrocardiogram (ECG)	ST	20	20	0.785089	0.877048	0.15087	0.446683	1.02549	0.407776
	IMPC_ECG_009_001	Electrocardiogram (ECG)	QTc	16	16	0.744599	0.700825	0.049303	0.670695	1.02829	0.185119
	IMPC_ECG_010_001	Electrocardiogram (ECG)	HRV	19	20	0.458991	0.77731	0.593192	-0.170353	0.940653	0.797633
	IMPC_ECG_011_001	Electrocardiogram (ECG)	QTc Dispersion	20	18	0.996605	0.999813	0.265652	0.35762	1.09377	0.55647
	IMPC_ECG_012_001	Electrocardiogram (ECG)	Mean SR amplitude	20	20	0.638731	0.902344	0.47809	0.222878	1.11053	0.731845
	IMPC_ECG_013_001	Electrocardiogram (ECG)	Mean R amplitude	20	20	0.978393	0.929603	0.360118	0.286988	1.13696	0.632125
	IMPC_ECG_014_001	Electrocardiogram (ECG)	rMSSD	19	19	0.580416	0.815452	0.793425	-0.0847112	0.966418	0.892043
	IMPC_ECG_015_001	Electrocardiogram (ECG)	pNN5(6>ms)	14	13	0.0270993	0.0216988	0.693297	0.133406	1.13036	0.822963
	IMPC_GRS_001_001-1	Grip Strength	Forelimb grip strength measurement	19	20	0.959509	0.999909	0.486239	0.221708	1.02512	0.738638
	IMPC_GRS_001_001-2	Grip Strength	Forelimb grip strength measurement	19	20	0.999813	0.998665	0.256858	0.358678	1.05683	0.543774
	IMPC_GRS_001_001-3	Grip Strength	Forelimb grip strength measurement	19	17	0.322794	0.99137	0.172723	0.447796	1.04098	0.424344
	IMPC_GRS_002_001-1	Grip Strength	Forelimb and hindlimb grip strength measurement	19	20	0.746505	0.321614	0.127278	0.479486	1.08983	0.367076
	IMPC_GRS_002_001-2	Grip Strength	Forelimb and hindlimb grip strength measurement	19	20	0.988917	0.7531	0.418	0.257597	1.04192	0.665455
	IMPC_GRS_002_001-3	Grip Strength	Forelimb and hindlimb grip strength measurement	18	19	0.82543	0.975334	0.205435	0.410405	1.06584	0.475367
	IMPC_GRS_003_001	Grip Strength	Body weight	19	20	0.854443	0.744625	4.3e-09	1.50807	1.26251	2.69e-07
	IMPC_GRS_008_001	Grip Strength	Forelimb grip strength measurement mean	19	19	0.824169	0.841973	0.111518	0.50597	1.03926	0.336243
	IMPC_GRS_009_001	Grip Strength	Forelimb and hindlimb grip strength measurement mean	14	19	0.979235	0.894499	0.0352748	0.714053	1.04923	0.143259
	IMPC_GRS_010_001	Grip Strength	Forelimb grip strength normalised against body weight	18	20	0.458029	0.997432	2.04e-08	-1.48007	0.825503	5.21e-07
	IMPC_GRS_011_001	Grip Strength	Forelimb and hindlimb grip strength normalised against body weight	18	20	0.62302	0.891803	3.12e-05	-1.20017	0.853904	0.000194215
	IMPC_HEM_001_001	Hematology	White blood cell count	18	17	0.857225	0.91245	0.219022	0.409922	1.11429	0.487361
	IMPC_HEM_002_001	Hematology	Red blood cell count	19	17	0.945088	0.746926	0.168779	0.451834	1.02468	0.421029
	IMPC_HEM_003_001	Hematology	Hemoglobin	19	17	0.91752	0.898694	0.661818	-0.145236	0.993337	0.816875
	IMPC_HEM_004_001	Hematology	Hematocrit	18	16	0.893204	0.773068	0.0195082	0.765427	1.04361	0.0825984
	IMPC_HEM_005_001	Hematology	Mean cell volume	19	17	0.963981	0.991964	0.776506	0.0944784	1.00131	0.877981
	IMPC_HEM_006_001	Hematology	Mean corpuscular hemoglobin	18	17	0.721375	0.92057	0.166845	-0.457538	0.975795	0.421029
	IMPC_HEM_007_001	Hematology	Mean cell hemoglobin concentration	19	17	0.796784	0.891379	0.580424	-0.182524	0.979623	0.796581
	IMPC_HEM_008_001	Hematology	Platelet count	18	16	0.972823	0.999377	9.32e-05	1.19257	1.18321	0.00052992
	IMPC_HEM_019_001	Hematology	Mean platelet volume	18	17	0.399265	0.145414	0.165827	-0.444954	0.982155	0.421029
	IMPC_HEM_027_001	Hematology	Red blood cell distribution width	17	16	0.960733	0.996055	0.412695	0.281832	1.01265	0.662309
	IMPC_HEM_029_001	Hematology	Neutrophil differential count	18	16	0.990486	0.471449	0.0102572	0.836097	1.3405	0.0463903
	IMPC_HEM_030_001	Hematology	Neutrophil cell count	19	16	0.981159	0.994683	0.00333288	0.931229	1.44661	0.0165811
	IMPC_HEM_031_001	Hematology	Lymphocyte differential count	17	16	0.991337	0.927305	0.00468984	-0.921932	0.924387	0.0217041
	IMPC_HEM_032_001	Hematology	Lymphocyte cell count	17	16	0.906533	0.851837	0.314079	0.347125	1.06573	0.589639
	IMPC_HEM_033_001	Hematology	Monocyte differential count	18	17	0.512414	0.601481	0.91611	0.0355425	0.988745	0.975322
	IMPC_HEM_034_001	Hematology	Monocyte cell count	19	17	0.688349	0.593734	0.593215	0.176272	1.03932	0.797633
	IMPC_HEM_035_001	Hematology	Eosinophil differential count	15	16	0.310995	0.26253	0.507635	0.224879	1.99855	0.753432
	IMPC_HEM_036_001	Hematology	Eosinophil cell count	15	16	3.14e-05	0.00563452	0.10771	0.461093	3.33333	0.329757
	IMPC_HEM_037_001	Hematology	Basophil cell count	15	16	9.83e-08	1.42e-05	0.130281	0.347076	13.125	0.370369
	IMPC_HEM_038_001	Hematology	Basophil differential count	15	16	6.62e-06	0.0158531	0.0462986	0.560848	6.5625	0.180655
	IMPC_HWT_007_001	Heart Weight	Body weight	20	20	0.997394	0.900279	2.09e-08	1.45286	1.2264	5.21e-07
	IMPC_HWT_008_001	Heart Weight	Heart weight	19	19	0.356514	0.963477	5.85e-06	1.27491	1.29172	4.48e-05
	IMPC_HWT_012_001	Heart Weight	Heart weight normalised against body weight	19	19	0.907084	0.87773	0.355474	0.297275	1.04446	0.631601
	IMPC_HWT_999_999	Heart Weight	Heart weight normalised against tibia length	16	17	0.720697	0.999997	6.75e-06	1.33749	1.28568	4.8e-05
	IMPC_IPG_001_001	Intraperitoneal glucose tolerance test (IPGTT)	Body Weight	15	19	0.923507	0.491035	2.96e-08	1.52446	1.26279	5.89e-07
	IMPC_IPG_002_001-0	Intraperitoneal glucose tolerance test (IPGTT)	Blood glucose concentration	16	19	0.988471	0.999261	0.0558486	0.624731	1.10651	0.20207
	IMPC_IPG_002_001-120	Intraperitoneal glucose tolerance test (IPGTT)	Blood glucose concentration	14	16	0.254595	0.360632	4.66e-08	1.54639	1.38698	7.73e-07
	IMPC_IPG_002_001-15	Intraperitoneal glucose tolerance test (IPGTT)	Blood glucose concentration	16	19	0.949783	0.799058	0.168408	0.459136	1.0545	0.421029
	IMPC_IPG_002_001-30	Intraperitoneal glucose tolerance test (IPGTT)	Blood glucose concentration	16	19	0.943316	0.967701	8.1e-05	1.18948	1.26603	0.000474143
	IMPC_IPG_002_001-60	Intraperitoneal glucose tolerance test (IPGTT)	Blood glucose concentration	16	19	1	0.965275	4.09e-06	1.33636	1.38855	3.47e-05
	IMPC_IPG_010_001	Intraperitoneal glucose tolerance test (IPGTT)	Fasted blood glucose concentration	16	19	0.988471	0.999261	0.0558486	0.624731	1.10651	0.20207
	IMPC_IPG_011_001	Intraperitoneal glucose tolerance test (IPGTT)	Initial response to glucose challenge	16	19	0.999452	0.960186	0.408246	0.278508	1.03642	0.662309
	IMPC_IPG_012_001	Intraperitoneal glucose tolerance test (IPGTT)	Area under glucose response curve	16	19	0.984068	0.99804	5.4e-05	1.21213	1.41467	0.000325447
	IMPC_OFD_001_001-10	Open Field	Whole arena resting time series	20	19	0.91875	0.63811	0.671464	-0.135369	0.974183	0.819763
	IMPC_OFD_001_001-15	Open Field	Whole arena resting time series	20	18	0.870434	0.930723	0.9523	0.0193874	1.00764	0.981905
	IMPC_OFD_001_001-20	Open Field	Whole arena resting time series	20	20	0.9354	0.394934	0.305555	-0.320906	0.924363	0.584526
	IMPC_OFD_001_001-5	Open Field	Whole arena resting time series	20	20	0.970735	0.957165	0.134476	0.465081	1.17797	0.373655
	IMPC_OFD_002_001-10	Open Field	Whole arena average speed series	20	19	0.998032	0.990896	0.271921	-0.348135	0.955817	0.559299
	IMPC_OFD_002_001-15	Open Field	Whole arena average speed series	18	20	0.968103	0.743941	0.135192	0.47637	1.0487	0.373655
	IMPC_OFD_002_001-20	Open Field	Whole arena average speed series	20	20	0.872658	0.975697	0.880479	0.0474141	0.999673	0.952257
	IMPC_OFD_002_001-5	Open Field	Whole arena average speed series	20	20	0.966221	0.9872	0.215943	-0.386216	0.940572	0.487361
	IMPC_OFD_003_001-10	Open Field	Periphery distance travelled series	18	20	0.931515	0.993792	0.822528	-0.0726697	0.97516	0.90935
	IMPC_OFD_003_001-15	Open Field	Periphery distance travelled series	18	20	0.72848	0.879212	0.677725	-0.134525	0.994217	0.820261
	IMPC_OFD_003_001-20	Open Field	Periphery distance travelled series	20	20	0.989264	0.950342	0.169258	0.428134	1.13713	0.421029
	IMPC_OFD_003_001-5	Open Field	Periphery distance travelled series	20	20	0.999717	0.999949	0.018794	-0.714559	0.814974	0.0813046
	IMPC_OFD_004_001-10	Open Field	Periphery resting time series	20	20	0.588229	0.97788	0.992657	-0.00290263	0.99709	0.994591
	IMPC_OFD_004_001-15	Open Field	Periphery resting time series	20	20	0.961425	0.995766	0.193655	0.405389	1.21307	0.460516
	IMPC_OFD_004_001-20	Open Field	Periphery resting time series	20	20	0.766499	0.462894	0.537443	-0.194011	0.967585	0.769433
	IMPC_OFD_004_001-5	Open Field	Periphery resting time series	20	20	0.675593	0.963493	0.272623	0.343246	1.18549	0.559299
	IMPC_OFD_005_001-10	Open Field	Distance travelled	20	18	0.959187	0.929107	0.450245	-0.243722	0.915412	0.705501
	IMPC_OFD_005_001-15	Open Field	Distance travelled	19	20	0.670786	0.992034	0.405868	0.264355	1.08645	0.662309
	IMPC_OFD_005_001-20	Open Field	Distance travelled	20	20	0.983431	0.867656	0.362122	0.285848	1.09389	0.632125
	IMPC_OFD_005_001-5	Open Field	Distance travelled	20	20	0.817002	0.932507	0.194389	-0.404738	0.86464	0.460516
	IMPC_OFD_006_001-10	Open Field	Number of Rears	20	18	0.888416	0.999561	0.585807	0.175182	1.0631	0.797633
	IMPC_OFD_006_001-15	Open Field	Number of Rears	20	20	0.808569	0.759841	0.492812	0.215498	1.17328	0.742952
	IMPC_OFD_006_001-20	Open Field	Number of Rears	20	20	0.760435	0.97495	0.633221	0.150247	1.08403	0.802515
	IMPC_OFD_006_001-5	Open Field	Number of Rears	19	20	0.216354	0.452582	0.511611	-0.208779	0.960938	0.753432
	IMPC_OFD_007_001	Open Field	Whole arena resting time	20	20	0.730792	0.991096	0.687399	0.126777	1.01606	0.822963
	IMPC_OFD_008_001	Open Field	Whole arena permanence	20	20					1
	IMPC_OFD_009_001	Open Field	Whole arena average speed	20	20	0.999077	0.989433	0.606529	-0.162156	0.985023	0.802515
	IMPC_OFD_010_001	Open Field	Periphery distance travelled	18	19	0.884173	0.996077	0.246184	-0.376869	0.957392	0.532506
	IMPC_OFD_011_001	Open Field	Periphery resting time	20	20	0.976368	0.996062	0.52914	0.197965	1.0858	0.763036
	IMPC_OFD_012_001	Open Field	Periphery permanence time	20	20	0.960609	0.987673	0.752545	0.099376	1.03851	0.860669
	IMPC_OFD_013_001	Open Field	Periphery average speed	20	20	0.864507	0.997995	0.306766	-0.320028	0.972537	0.584526
	IMPC_OFD_014_001	Open Field	Center distance travelled	19	20	0.721629	0.960843	0.990747	0.00370607	1.0706	0.994591
	IMPC_OFD_015_001	Open Field	Center resting time	20	20	0.929334	0.612089	0.985041	-0.00591352	0.73551	0.994591
	IMPC_OFD_016_001	Open Field	Center permanence time	20	20	0.960609	0.987673	0.752545	-0.099376	0.868285	0.860669
	IMPC_OFD_017_001	Open Field	Center average speed	19	20	0.761842	0.911267	0.276793	0.344461	1.03625	0.562059
	IMPC_OFD_018_001	Open Field	Latency to center entry	18	20	0.826243	0.688531	0.198242	0.412164	3.70253	0.464119
	IMPC_OFD_019_001	Open Field	Number of center entries	18	20	0.865951	0.744591	0.756992	0.0994897	1.03197	0.860808
	IMPC_OFD_020_001	Open Field	Distance travelled - total	20	20	0.879129	0.998256	0.664415	-0.136658	0.981769	0.816875
	IMPC_OFD_021_001	Open Field	Number of rears - total	20	20	0.821425	0.960468	0.651103	0.142356	1.07164	0.814902
	IMPC_OFD_022_001	Open Field	Percentage center time	20	20	0.960609	0.987673	0.752545	-0.099376	0.868285	0.860669
	IMPC_OFD_042_001-10	Open Field	Periphery permanence time series	20	20	0.925164	0.917341	0.918146	0.0324114	1.00398	0.975322
	IMPC_OFD_042_001-15	Open Field	Periphery permanence time series	20	19	0.793062	0.812019	0.188376	0.415399	1.15733	0.457156
	IMPC_OFD_042_001-20	Open Field	Periphery permanence time series	20	19	0.803089	0.796333	0.630716	0.153373	1.06504	0.802515
	IMPC_OFD_042_001-5	Open Field	Periphery permanence time series	19	20	0.945615	0.968649	0.886345	0.0456677	0.975963	0.95342
	IMPC_OFD_043_001-10	Open Field	Periphery average speed series	20	20	0.933317	0.84484	0.0803134	-0.540451	0.960813	0.275558
	IMPC_OFD_043_001-15	Open Field	Periphery average speed series	20	20	0.955114	0.983722	0.396173	0.26628	1.02505	0.662309
	IMPC_OFD_043_001-20	Open Field	Periphery average speed series	20	20	0.729029	0.932059	0.874036	0.0499921	1.00823	0.950455
	IMPC_OFD_043_001-5	Open Field	Periphery average speed series	20	20	0.907595	0.981614	0.0748112	-0.55022	0.933494	0.265847
	IMPC_OFD_044_001-10	Open Field	Center distance travelled series	20	20	0.7977	0.789327	0.820202	-0.0716617	0.972142	0.90935
	IMPC_OFD_044_001-15	Open Field	Center distance travelled series	19	19	0.556106	0.967301	0.994591	0.00219431	1.01264	0.994591
	IMPC_OFD_044_001-20	Open Field	Center distance travelled series	20	20	0.975432	0.980969	0.972161	-0.0110068	1.01766	0.992103
	IMPC_OFD_044_001-5	Open Field	Center distance travelled series	19	20	0.966419	0.94093	0.865004	-0.0543159	1.10033	0.945801
	IMPC_OFD_045_001-10	Open Field	Center resting time series	20	20	0.605098	0.936637	0.804687	0.0760665	1.03017	0.899621
	IMPC_OFD_045_001-15	Open Field	Center resting time series	18	19	0.255825	0.942897	0.562605	-0.183133	0.620371	0.788439
	IMPC_OFD_045_001-20	Open Field	Center resting time series	20	18	0.73133	0.565771	0.497371	-0.215088	0.527919	0.744187
	IMPC_OFD_045_001-5	Open Field	Center resting time series	19	19	0.0490155	0.00620603	0.630031	-0.140813	1.15425	0.802515
	IMPC_OFD_046_001-10	Open Field	Center permanence time series	20	20	0.946438	0.933032	0.967945	-0.0126747	0.9911	0.992103
	IMPC_OFD_046_001-15	Open Field	Center permanence time series	20	19	0.90034	0.906383	0.153685	-0.449593	0.586207	0.407776
	IMPC_OFD_046_001-20	Open Field	Center permanence time series	20	19	0.803456	0.809853	0.614744	-0.160557	0.781082	0.802515
	IMPC_OFD_046_001-5	Open Field	Center permanence time series	19	20	0.963944	0.975071	0.946737	-0.021347	1.17327	0.981277
	IMPC_OFD_047_001-10	Open Field	Center average speed series	19	20	0.972624	0.988841	0.727417	0.111221	1.0142	0.851506
	IMPC_OFD_047_001-15	Open Field	Center average speed series	20	20	0.994827	0.996158	0.123626	0.478045	1.08031	0.361787
	IMPC_OFD_047_001-20	Open Field	Center average speed series	19	20	0.965199	0.867576	0.606156	0.164452	1.04121	0.802515
	IMPC_OFD_047_001-5	Open Field	Center average speed series	20	19	0.858668	0.922847	0.514908	-0.207494	0.955486	0.753432
	IMPC_OFD_048_001-10	Open Field	Number of center entries series	20	20	0.979188	0.439212	0.94676	0.0209157	1.04264	0.981277
	IMPC_OFD_048_001-15	Open Field	Number of center entries series	20	20	0.544186	0.364006	0.680116	0.128557	1.06635	0.820261
	IMPC_OFD_048_001-20	Open Field	Number of center entries series	20	19	0.73536	0.977335	0.629664	0.152576	1.10412	0.802515
	IMPC_OFD_048_001-5	Open Field	Number of center entries series	20	20	0.436431	0.734248	0.378296	-0.275827	0.903346	0.654617
	IMPC_XRY_008_001	X-ray	Number of ribs right	17	18					1
	IMPC_XRY_009_001	X-ray	Number of ribs left	17	18					1
	IMPC_XRY_013_001	X-ray	Number of cervical vertebrae	17	18					1
	IMPC_XRY_014_001	X-ray	Number of thoracic vertebrae	17	18					1
	IMPC_XRY_015_001	X-ray	Number of lumbar vertebrae	17	18					1
	IMPC_XRY_016_001	X-ray	Number of pelvic vertebrae	17	18					1
	IMPC_XRY_028_001	X-ray	Number of digits	17	18					1
	IMPC_XRY_033_001	X-ray	Tibia length	16	17	0.594534	0.911089	0.55038	0.206196	1.0031	0.782325
	TCP_TFL_001_001-1	Tail Flick	atency to tail flick	13	15	0.998905	0.999238	0.00137269	1.09964	1.35968	0.00700426
	TCP_TFL_001_001-2	Tail Flick	atency to tail flick	14	15	0.690088	0.958811	0.39539	0.313382	1.12982	0.662309
	TCP_TFL_001_001-3	Tail Flick	atency to tail flick	13	15	0.649737	0.598537	0.241097	0.43468	1.25191	0.527234

## Sheet: 2_after bw adjusted
	SI Data 4b. Sex as a Biological variable in IMPC Phenotype Data with Bodyweight as a Confounder for wildtype Mice.
long column names	label	Parameter name	# of female WT mice	# of male WT mice	Normality of female WT mice after data transformation	Normality of male WT mice after data transformation	p value Male vs. Female	estimate of WT Male vs. Female	foldchange WT male vs. female	adjusted p value	comment of row3
short column names	label	Parameter name	F_Count	M_Count	Normality_F	Normality_M	p_value	Coefficient	fold_change	adjusted_p_value
	IMPC_ABR_001_001	Body weight	8	8	0.926463	0.975579	0.538183	-0.151226	1.21444	0.899703
	IMPC_ABR_002_001	Click-evoked ABR threshold	7	5					1
	IMPC_ABR_004_001	6kHz-evoked ABR Threshold	7	8	0.00149744	0.00318206	0.512092	0.503886	0.932065	0.899703
	IMPC_ABR_006_001	12kHz-evoked ABR Threshold	8	8	0.0271619	0.0554068	0.00358015	2.09607	1.17241	0.178112
	IMPC_ABR_008_001	18kHz-evoked ABR Threshold	8	8	6.32298e-05	0.0270816	0.375383	0.659721	1.08824	0.861569
	IMPC_ABR_010_001	24kHz-evoked ABR Threshold	8	8	0.000479057	0.33159	0.992854	-0.00772701	0.955556	0.996205
	IMPC_ABR_012_001	30kHz-evoked ABR Threshold	8	8	0.291064	0.843664	0.409987	-0.777212	0.875	0.861569
	IMPC_ACS_001_001	Response amplitude - BN	19	17	0.995719	0.999372	0.403942	-0.447013	1.16099	0.861569
	IMPC_ACS_002_001	Response amplitude - PP1	19	17	0.808377	0.985455	0.219464	-0.677748	1.0121	0.824026
	IMPC_ACS_003_001	Response amplitude - PP2	17	17	0.954189	0.673107	0.497751	-0.352228	1.28092	0.884396
	IMPC_ACS_004_001	Response amplitude - PP3	19	17	0.993616	0.936139	0.522791	0.359384	1.13954	0.899703
	IMPC_ACS_005_001	Response amplitude - PP4	19	18	0.647205	0.414047	0.922506	-0.0561	1.08037	0.98283
	IMPC_ACS_006_001	Response amplitude - S	17	18	0.547643	0.976585	0.663672	0.257735	1.39497	0.966689
	IMPC_ACS_007_001	Response amplitude - PP1_S	19	18	0.999328	0.92146	0.733638	-0.195789	1.10633	0.981121
	IMPC_ACS_008_001	Response amplitude - PP2_S	17	18	0.617523	0.721912	0.45739	-0.43253	0.981493	0.861569
	IMPC_ACS_009_001	Response amplitude - PP3_S	17	17	0.891941	0.858155	0.588309	-0.324787	1.07398	0.91502
	IMPC_ACS_010_001	Response amplitude - PP4_S	18	17	0.656195	0.92984	0.331932	-0.576958	0.920128	0.861569
	IMPC_ACS_033_001	% Pre-pulse inhibition - PPI1	17	18	0.922714	0.970715	0.623841	-0.293796	0.739483	0.954957
	IMPC_ACS_034_001	% Pre-pulse inhibition - PPI2	18	18	0.729266	0.992175	0.137653	0.826898	1.35027	0.652212
	IMPC_ACS_035_001	% Pre-pulse inhibition - PPI3	19	18	0.958091	0.848167	0.996205	0.00272146	1.22262	0.996205
	IMPC_ACS_036_001	% Pre-pulse inhibition - PPI4	19	16	0.982953	0.997324	0.443842	0.428898	1.10016	0.861569
	IMPC_ACS_037_001	% Pre-pulse inhibition - Global	18	18	0.865504	0.848542	0.282459	0.6159	1.17061	0.861569
	IMPC_BWT_001_001	Body weight	19	20	0.538577	0.781876	0.49224	0.0577893	1.0854	0.882484
	IMPC_BWT_008_001-10	Body weight curve	16	18	0.891233	0.955754	0.06407	-0.30735	1.25086	0.500922
	IMPC_BWT_008_001-11	Body weight curve	18	18	0.99414	0.626678	0.242614	-0.187599	1.23941	0.829815
	IMPC_BWT_008_001-12	Body weight curve	10	12	0.601	0.642401	0.0230516	-0.545636	1.27502	0.357894
	IMPC_BWT_008_001-13	Body weight curve	17	20	0.991141	0.850226	0.263556	-0.142206	1.21183	0.829815
	IMPC_BWT_008_001-14	Body weight curve	13	16	0.817186	0.943747	0.0289715	-0.386293	1.24904	0.41181
	IMPC_BWT_008_001-15	Body weight curve	16	16	0.941771	0.855322	0.367354	-0.173558	1.25351	0.861569
	IMPC_BWT_008_001-16	Body weight curve	16	14	1	0.957187	0.476339	-0.105209	1.21126	0.869647
	IMPC_BWT_008_001-4	Body weight curve	16	18	0.606465	0.842735	0.832179	-0.0187146	1.15366	0.981121
	IMPC_BWT_008_001-5	Body weight curve	16	18	0.553417	0.489666	0.173612	-0.171419	1.22277	0.701252
	IMPC_BWT_008_001-6	Body weight curve	17	18	0.511854	0.495662	0.102167	-0.257962	1.25241	0.570598
	IMPC_BWT_008_001-7	Body weight curve	13	17	0.719883	0.621783	0.0179443	-0.350019	1.26446	0.324629
	IMPC_BWT_008_001-8	Body weight curve	13	16	0.900157	0.699269	0.0551228	-0.265856	1.29226	0.500922
	IMPC_BWT_008_001-9	Body weight curve	18	17	0.987278	0.765819	0.121495	-0.239736	1.24105	0.619937
	IMPC_CAL_001_001	Body weight before experiment	18	17	0.838537	0.726745	0.0755159	-0.303692	1.24153	0.500922
	IMPC_CAL_002_001	Body weight after experiment	15	17	0.493018	0.991864	0.313334	0.383027	1.2495	0.861569
	IMPC_CAL_008_001	Total food intake	6	5	0.870225	0.842856	0.385942	1.12397	1.1499	0.861569
	IMPC_CAL_017_001	Respiratory Exchange Ratio	18	17	0.923243	0.644789	0.0325018	1.36914	1.00992	0.431191
	IMPC_CBC_001_001	Sodium	18	18	0.852591	0.768066	0.449504	0.427113	1.00912	0.861569
	IMPC_CBC_002_001	Potassium	18	19	0.322013	0.603287	0.355678	0.51381	1.02098	0.861569
	IMPC_CBC_003_001	Chloride	18	19	0.990975	0.996891	0.167944	-0.751919	0.989486	0.696266
	IMPC_CBC_004_001	Urea (Blood Urea Nitrogen - BUN)	17	19	0.989756	0.998865	0.841454	0.111407	1.03853	0.981121
	IMPC_CBC_005_001	Creatinine	18	18	0.394622	0.365725	0.20053	0.646639	0.924091	0.767414
	IMPC_CBC_006_001	Total protein	18	19	0.266173	0.857229	0.849331	0.105555	1.01144	0.981121
	IMPC_CBC_007_001	Albumin	17	19	0.436017	0.579656	0.0094076	-1.22765	0.934083	0.291326
	IMPC_CBC_008_001	Total bilirubin	14	19	0.386101	0.33111	0.539836	-0.325149	1.01732	0.899703
	IMPC_CBC_009_001	Calcium	17	19	0.940116	0.969675	0.384731	0.482181	1.01048	0.861569
	IMPC_CBC_010_001	Phosphorus	17	19	0.636953	0.775745	0.475396	-0.398603	0.975056	0.869647
	IMPC_CBC_012_001	Aspartate aminotransferase	17	18	0.709357	0.971575	0.565362	-0.310526	0.946547	0.907315
	IMPC_CBC_013_001	Alanine aminotransferase	16	18	0.910735	0.996684	0.129732	0.823972	1.28856	0.629675
	IMPC_CBC_014_001	Alkaline phosphatase	17	19	0.330606	0.32228	0.000281693	-1.32039	0.627014	0.0280508
	IMPC_CBC_015_001	Total cholesterol	17	18	0.868749	1	0.111517	0.657869	1.22116	0.583995
	IMPC_CBC_016_001	HDL-cholesterol	17	17	0.574466	0.697856	0.000568461	1.4082	1.37115	0.0377079
	IMPC_CBC_017_001	Triglycerides	18	18	0.352989	0.947433	0.0175773	1.20884	1.36149	0.324629
	IMPC_CBC_018_001	Glucose	18	19	0.975155	0.911439	0.129427	0.775724	1.10595	0.629675
	IMPC_CBC_058_001	Cholesterol ratio	18	18	0.999984	0.848494	0.000281917	-1.73257	0.905076	0.0280508
	IMPC_CBC_999_999	Non-HDL-cholesterol	18	19	0.434882	0.75078	0.405309	-0.411148	1.09245	0.861569
	IMPC_CSD_032_001	Locomotor activity	19	19	0.460607	0.984783	0.771984	0.160021	1.06321	0.981121
	IMPC_DXA_001_001	Body weight	18	19	0.93398	0.942738	0.15546	-0.182789	1.22742	0.672535
	IMPC_DXA_002_001	Fat mass	17	18	0.582203	0.576041	0.588344	-0.218784	1.28508	0.91502
	IMPC_DXA_003_001	Lean mass	18	19	0.749256	0.955067	0.266007	0.247447	1.25344	0.829815
	IMPC_DXA_004_001	Bone Mineral Density (excluding skull)	18	19	0.299756	0.525395	0.102237	-0.77493	1.02404	0.570598
	IMPC_DXA_005_001	Bone Mineral Content (excluding skull)	17	19	0.898799	0.407524	0.437368	-0.384859	1.06308	0.861569
	IMPC_DXA_006_001	Body length	18	19	0.339142	0.833295	0.32342	-0.251532	1.04521	0.861569
	IMPC_DXA_007_001	BMC/Body weight	18	19	0.910129	0.541256	0.44683	-0.28938	0.86794	0.861569
	IMPC_DXA_008_001	Lean/Body weight	18	19	0.847982	0.828802	0.102525	0.897116	1.0177	0.570598
	IMPC_DXA_009_001	Fat/Body weight	17	18	0.739286	0.974943	0.662108	-0.261009	1.04783	0.966689
	IMPC_DXA_010_001	Bone Area	17	19	0.848638	0.738993	0.985409	0.00933749	1.03781	0.996205
	IMPC_ECG_001_001	Number of signals	19	17	0.902302	0.92624	0.110798	-0.903426	0.924648	0.583995
	IMPC_ECG_002_001	HR	19	18	0.811935	0.969986	0.803684	0.140589	0.98507	0.981121
	IMPC_ECG_003_001	CV	17	18	0.544875	0.6639	0.481126	-0.406101	1.04228	0.8704
	IMPC_ECG_004_001	RR	19	18	0.797914	0.977335	0.815055	-0.131801	1.01639	0.981121
	IMPC_ECG_005_001	PQ	19	18	0.77059	0.919448	0.945185	0.0396048	0.983983	0.985455
	IMPC_ECG_006_001	PR	19	18	0.994015	0.992237	0.975551	-0.0178119	1.00074	0.996205
	IMPC_ECG_007_001	QRS	19	18	0.980124	0.951158	0.926356	-0.0525448	1.02184	0.98283
	IMPC_ECG_008_001	ST	19	18	0.832284	0.85403	0.419346	0.451817	1.03254	0.861569
	IMPC_ECG_009_001	QTc	16	15	0.760126	0.72716	0.3004	0.688924	1.02723	0.861569
	IMPC_ECG_010_001	HRV	18	18	0.335139	0.660855	0.378752	-0.508292	0.960603	0.861569
	IMPC_ECG_011_001	QTc Dispersion	19	16	0.999775	0.999989	0.372835	0.544775	1.06511	0.861569
	IMPC_ECG_012_001	Mean SR amplitude	19	18	0.593402	0.853433	0.0649587	1.04275	1.1186	0.500922
	IMPC_ECG_013_001	Mean R amplitude	19	18	0.937827	0.880381	0.0713973	1.02163	1.13808	0.500922
	IMPC_ECG_014_001	rMSSD	18	17	0.821667	0.894318	0.868485	-0.0966416	0.974362	0.981121
	IMPC_ECG_015_001	pNN5(6>ms)	13	12	0.0687985	0.0577736	0.899238	-0.0771009	1.13709	0.98283
	IMPC_GRS_001_001-1	Forelimb grip strength measurement	19	20	0.959509	0.999909	0.516979	-0.388276	1.02512	0.899703
	IMPC_GRS_001_001-2	Forelimb grip strength measurement	19	20	0.999813	0.998665	0.852386	-0.110739	1.05683	0.981121
	IMPC_GRS_001_001-3	Forelimb grip strength measurement	19	17	0.322794	0.99137	0.986519	0.0100232	1.04098	0.996205
	IMPC_GRS_002_001-1	Forelimb and hindlimb grip strength measurement	19	20	0.746505	0.321614	0.793973	-0.151813	1.08983	0.981121
	IMPC_GRS_002_001-2	Forelimb and hindlimb grip strength measurement	19	20	0.988917	0.7531	0.974626	0.0192831	1.04192	0.996205
	IMPC_GRS_002_001-3	Forelimb and hindlimb grip strength measurement	18	19	0.82543	0.975334	0.266875	-0.640959	1.06584	0.829815
	IMPC_GRS_003_001	Body weight	19	20	0.854443	0.744625	0.0110094	-0.3262	1.26251	0.291326
	IMPC_GRS_008_001	Forelimb grip strength measurement mean	19	19	0.824169	0.841973	0.928502	-0.0522606	1.03926	0.98283
	IMPC_GRS_009_001	Forelimb and hindlimb grip strength measurement mean	14	19	0.979235	0.894499	0.458961	-0.41975	1.04923	0.861569
	IMPC_GRS_010_001	Forelimb grip strength normalised against body weight	18	20	0.458029	0.997432	0.0644772	-0.725797	0.825503	0.500922
	IMPC_GRS_011_001	Forelimb and hindlimb grip strength normalised against body weight	18	20	0.62302	0.891803	0.85806	-0.0777551	0.853904	0.981121
	IMPC_HEM_001_001	White blood cell count	18	17	0.857225	0.91245	0.0737812	0.976673	1.11429	0.500922
	IMPC_HEM_002_001	Red blood cell count	19	17	0.945088	0.746926	0.0879414	0.932121	1.02468	0.564527
	IMPC_HEM_003_001	Hemoglobin	19	17	0.91752	0.898694	0.926238	0.0514753	0.993337	0.98283
	IMPC_HEM_004_001	Hematocrit	18	16	0.893204	0.773068	0.0399352	1.0856	1.04361	0.496694
	IMPC_HEM_005_001	Mean cell volume	19	17	0.963981	0.991964	0.940529	-0.041678	1.00131	0.985455
	IMPC_HEM_006_001	Mean corpuscular hemoglobin	18	17	0.721375	0.92057	0.0497328	-1.06186	0.975795	0.500922
	IMPC_HEM_007_001	Mean cell hemoglobin concentration	19	17	0.796784	0.891379	0.403829	-0.462173	0.979623	0.861569
	IMPC_HEM_008_001	Platelet count	18	16	0.972823	0.999377	0.144236	0.658662	1.18321	0.667509
	IMPC_HEM_019_001	Mean platelet volume	18	17	0.399265	0.145414	0.851092	-0.0975853	0.982155	0.981121
	IMPC_HEM_027_001	Red blood cell distribution width	17	16	0.960733	0.996055	0.427465	0.43996	1.01265	0.861569
	IMPC_HEM_029_001	Neutrophil differential count	18	16	0.990486	0.471449	0.0745188	0.930027	1.3405	0.500922
	IMPC_HEM_030_001	Neutrophil cell count	19	16	0.981159	0.994683	0.0135395	1.27051	1.44661	0.299374
	IMPC_HEM_031_001	Lymphocyte differential count	17	16	0.991337	0.927305	0.0117116	-1.29345	0.924387	0.291326
	IMPC_HEM_032_001	Lymphocyte cell count	17	16	0.906533	0.851837	0.0525651	1.06396	1.06573	0.500922
	IMPC_HEM_033_001	Monocyte differential count	18	17	0.512414	0.601481	0.349869	0.517706	0.988745	0.861569
	IMPC_HEM_034_001	Monocyte cell count	19	17	0.688349	0.593734	0.16112	0.765993	1.03932	0.682188
	IMPC_HEM_035_001	Eosinophil differential count	15	16	0.310995	0.26253	0.0665899	0.999606	1.99855	0.500922
	IMPC_HEM_036_001	Eosinophil cell count	15	16	3.14421e-05	0.00563452	0.00513795	1.26849	3.33333	0.204491
	IMPC_HEM_037_001	Basophil cell count	15	16	9.83431e-08	1.42343e-05	0.0682809	0.683631	13.125	0.500922
	IMPC_HEM_038_001	Basophil differential count	15	16	6.62236e-06	0.0158531	0.343579	0.429099	6.5625	0.861569
	IMPC_HWT_007_001	Body weight	20	20	0.997394	0.900279	0.418626	-0.100127	1.2264	0.861569
	IMPC_HWT_008_001	Heart weight	19	19	0.356514	0.963477	0.198392	0.472627	1.29172	0.767414
	IMPC_HWT_012_001	Heart weight normalised against body weight	19	19	0.907084	0.87773	0.0910403	0.890211	1.04446	0.566157
	IMPC_HWT_999_999	Heart weight normalised against tibia length	16	17	0.720697	0.999997	0.0503512	0.791945	1.28568	0.500922
	IMPC_IPG_001_001	Body Weight	15	19	0.923507	0.491035	0.422283	-0.160776	1.26279	0.861569
	IMPC_IPG_002_001-0	Blood glucose concentration	16	19	0.988471	0.999261	0.258051	0.62863	1.10651	0.829815
	IMPC_IPG_002_001-120	Blood glucose concentration	14	16	0.254595	0.360632	0.02338	0.924202	1.38698	0.357894
	IMPC_IPG_002_001-15	Blood glucose concentration	16	19	0.949783	0.799058	0.945838	-0.0379442	1.0545	0.985455
	IMPC_IPG_002_001-30	Blood glucose concentration	16	19	0.943316	0.967701	0.287558	0.465293	1.26603	0.861569
	IMPC_IPG_002_001-60	Blood glucose concentration	16	19	1	0.965275	0.629008	0.16237	1.38855	0.955515
	IMPC_IPG_010_001	Fasted blood glucose concentration	16	19	0.988471	0.999261	0.258051	0.62863	1.10651	0.829815
	IMPC_IPG_011_001	Initial response to glucose challenge	16	19	0.999452	0.960186	0.578174	-0.31522	1.03642	0.91502
	IMPC_IPG_012_001	Area under glucose response curve	16	19	0.984068	0.99804	0.838141	0.0781487	1.41467	0.981121
	IMPC_OFD_001_001-10	Whole arena resting time series	20	19	0.91875	0.63811	0.342223	0.518296	0.974183	0.861569
	IMPC_OFD_001_001-15	Whole arena resting time series	20	18	0.870434	0.930723	0.822265	0.129186	1.00764	0.981121
	IMPC_OFD_001_001-20	Whole arena resting time series	20	20	0.9354	0.394934	0.588555	-0.298928	0.924363	0.91502
	IMPC_OFD_001_001-5	Whole arena resting time series	20	20	0.970735	0.957165	0.371391	0.487881	1.17797	0.861569
	IMPC_OFD_002_001-10	Whole arena average speed series	20	19	0.998032	0.990896	0.356555	-0.53489	0.955817	0.861569
	IMPC_OFD_002_001-15	Whole arena average speed series	18	20	0.968103	0.743941	0.451246	0.41545	1.0487	0.861569
	IMPC_OFD_002_001-20	Whole arena average speed series	20	20	0.872658	0.975697	0.827249	0.122008	0.999673	0.981121
	IMPC_OFD_002_001-5	Whole arena average speed series	20	20	0.966221	0.9872	0.636056	-0.259372	0.940572	0.958902
	IMPC_OFD_003_001-10	Periphery distance travelled series	18	20	0.931515	0.993792	0.235419	-0.655773	0.97516	0.829815
	IMPC_OFD_003_001-15	Periphery distance travelled series	18	20	0.72848	0.879212	0.701247	-0.215847	0.994217	0.981121
	IMPC_OFD_003_001-20	Periphery distance travelled series	20	20	0.989264	0.950342	0.251175	0.629751	1.13713	0.829815
	IMPC_OFD_003_001-5	Periphery distance travelled series	20	20	0.999717	0.999949	0.103224	-0.860888	0.814974	0.570598
	IMPC_OFD_004_001-10	Periphery resting time series	20	20	0.588229	0.97788	0.925848	0.0520473	0.99709	0.98283
	IMPC_OFD_004_001-15	Periphery resting time series	20	20	0.961425	0.995766	0.456181	0.409034	1.21307	0.861569
	IMPC_OFD_004_001-20	Periphery resting time series	20	20	0.766499	0.462894	0.924715	0.0523776	0.967585	0.98283
	IMPC_OFD_004_001-5	Periphery resting time series	20	20	0.675593	0.963493	0.856018	0.0994913	1.18549	0.981121
	IMPC_OFD_005_001-10	Distance travelled	20	18	0.959187	0.929107	0.410758	-0.494185	0.915412	0.861569
	IMPC_OFD_005_001-15	Distance travelled	19	20	0.670786	0.992034	0.908712	0.0642216	1.08645	0.98283
	IMPC_OFD_005_001-20	Distance travelled	20	20	0.983431	0.867656	0.793738	0.1445	1.09389	0.981121
	IMPC_OFD_005_001-5	Distance travelled	20	20	0.817002	0.932507	0.447845	-0.41673	0.86464	0.861569
	IMPC_OFD_006_001-10	Number of Rears	20	18	0.888416	0.999561	0.863988	0.0949964	1.0631	0.981121
	IMPC_OFD_006_001-15	Number of Rears	20	20	0.808569	0.759841	0.769199	-0.16154	1.17328	0.981121
	IMPC_OFD_006_001-20	Number of Rears	20	20	0.760435	0.97495	0.542534	0.339561	1.08403	0.899703
	IMPC_OFD_006_001-5	Number of Rears	19	20	0.216354	0.452582	0.756575	-0.173751	0.960938	0.981121
	IMPC_OFD_007_001	Whole arena resting time	20	20	0.730792	0.991096	0.337922	0.532373	1.01606	0.861569
	IMPC_OFD_008_001	Whole arena permanence	20	20					1
	IMPC_OFD_009_001	Whole arena average speed	20	20	0.999077	0.989433	0.693982	-0.21947	0.985023	0.981121
	IMPC_OFD_010_001	Periphery distance travelled	18	19	0.884173	0.996077	0.151119	-0.796341	0.957392	0.672535
	IMPC_OFD_011_001	Periphery resting time	20	20	0.976368	0.996062	0.64213	0.258871	1.0858	0.960781
	IMPC_OFD_012_001	Periphery permanence time	20	20	0.960609	0.987673	0.877585	-0.0858573	1.03851	0.981121
	IMPC_OFD_013_001	Periphery average speed	20	20	0.864507	0.997995	0.559672	-0.322408	0.972537	0.905486
	IMPC_OFD_014_001	Center distance travelled	19	20	0.721629	0.960843	0.773876	0.162691	1.0706	0.981121
	IMPC_OFD_015_001	Center resting time	20	20	0.929334	0.612089	0.394685	0.471279	0.73551	0.861569
	IMPC_OFD_016_001	Center permanence time	20	20	0.960609	0.987673	0.877585	0.0858573	0.868285	0.981121
	IMPC_OFD_017_001	Center average speed	19	20	0.761842	0.911267	0.720837	0.202827	1.03625	0.981121
	IMPC_OFD_018_001	Latency to center entry	18	20	0.826243	0.688531	0.808455	-0.13009	3.70253	0.981121
	IMPC_OFD_019_001	Number of center entries	18	20	0.865951	0.744591	0.548288	0.335824	1.03197	0.900746
	IMPC_OFD_020_001	Distance travelled - total	20	20	0.879129	0.998256	0.552216	-0.331616	0.981769	0.900746
	IMPC_OFD_021_001	Number of rears - total	20	20	0.821425	0.960468	0.955586	0.0310222	1.07164	0.990425
	IMPC_OFD_022_001	Percentage center time	20	20	0.960609	0.987673	0.877585	0.0858573	0.868285	0.981121
	IMPC_OFD_042_001-10	Periphery permanence time series	20	20	0.925164	0.917341	0.766545	-0.165708	1.00398	0.981121
	IMPC_OFD_042_001-15	Periphery permanence time series	20	19	0.793062	0.812019	0.849739	0.102867	1.15733	0.981121
	IMPC_OFD_042_001-20	Periphery permanence time series	20	19	0.803089	0.796333	0.755855	-0.177095	1.06504	0.981121
	IMPC_OFD_042_001-5	Periphery permanence time series	19	20	0.945615	0.968649	0.176194	-0.744244	0.975963	0.701252
	IMPC_OFD_043_001-10	Periphery average speed series	20	20	0.933317	0.84484	0.316341	-0.54168	0.960813	0.861569
	IMPC_OFD_043_001-15	Periphery average speed series	20	20	0.955114	0.983722	0.649356	0.252168	1.02505	0.964342
	IMPC_OFD_043_001-20	Periphery average speed series	20	20	0.729029	0.932059	0.598501	0.293814	1.00823	0.923269
	IMPC_OFD_043_001-5	Periphery average speed series	20	20	0.907595	0.981614	0.463256	-0.394018	0.933494	0.861569
	IMPC_OFD_044_001-10	Center distance travelled series	20	20	0.7977	0.789327	0.906995	-0.0653042	0.972142	0.98283
	IMPC_OFD_044_001-15	Center distance travelled series	19	19	0.556106	0.967301	0.912404	0.0624029	1.01264	0.98283
	IMPC_OFD_044_001-20	Center distance travelled series	20	20	0.975432	0.980969	0.791558	-0.147705	1.01766	0.981121
	IMPC_OFD_044_001-5	Center distance travelled series	19	20	0.966419	0.94093	0.532014	0.351262	1.10033	0.899703
	IMPC_OFD_045_001-10	Center resting time series	20	20	0.605098	0.936637	0.360155	0.49573	1.03017	0.861569
	IMPC_OFD_045_001-15	Center resting time series	18	19	0.255825	0.942897	0.873131	0.0864378	0.620371	0.981121
	IMPC_OFD_045_001-20	Center resting time series	20	18	0.73133	0.565771	0.66551	0.239452	0.527919	0.966689
	IMPC_OFD_045_001-5	Center resting time series	19	19	0.0490155	0.00620603	0.241095	0.581033	1.15425	0.829815
	IMPC_OFD_046_001-10	Center permanence time series	20	20	0.946438	0.933032	0.758965	0.171345	0.9911	0.981121
	IMPC_OFD_046_001-15	Center permanence time series	20	19	0.90034	0.906383	0.779019	-0.151859	0.586207	0.981121
	IMPC_OFD_046_001-20	Center permanence time series	20	19	0.803456	0.809853	0.781987	0.157626	0.781082	0.981121
	IMPC_OFD_046_001-5	Center permanence time series	19	20	0.963944	0.975071	0.152127	0.787696	1.17327	0.672535
	IMPC_OFD_047_001-10	Center average speed series	19	20	0.972624	0.988841	0.854403	-0.102322	1.0142	0.981121
	IMPC_OFD_047_001-15	Center average speed series	20	20	0.994827	0.996158	0.79823	-0.134937	1.08031	0.981121
	IMPC_OFD_047_001-20	Center average speed series	19	20	0.965199	0.867576	0.427443	0.459035	1.04121	0.861569
	IMPC_OFD_047_001-5	Center average speed series	20	19	0.858668	0.922847	0.255503	-0.631026	0.955486	0.829815
	IMPC_OFD_048_001-10	Number of center entries series	20	20	0.979188	0.439212	0.683886	0.225776	1.04264	0.981121
	IMPC_OFD_048_001-15	Number of center entries series	20	20	0.544186	0.364006	0.977968	-0.0152317	1.06635	0.996205
	IMPC_OFD_048_001-20	Number of center entries series	20	19	0.73536	0.977335	0.833793	0.116144	1.10412	0.981121
	IMPC_OFD_048_001-5	Number of center entries series	20	20	0.436431	0.734248	0.694653	0.213539	0.903346	0.981121
	IMPC_XRY_008_001	Number of ribs right	17	18					1
	IMPC_XRY_009_001	Number of ribs left	17	18					1
	IMPC_XRY_013_001	Number of cervical vertebrae	17	18					1
	IMPC_XRY_014_001	Number of thoracic vertebrae	17	18					1
	IMPC_XRY_015_001	Number of lumbar vertebrae	17	18					1
	IMPC_XRY_016_001	Number of pelvic vertebrae	17	18					1
	IMPC_XRY_028_001	Number of digits	17	18					1
	IMPC_XRY_033_001	Tibia length	16	17	0.594534	0.911089	0.0544497	-1.00736	1.0031	0.500922
	TCP_TFL_001_001-1	atency to tail flick	13	14	0.992528	0.670484	0.237771	0.667679	1.39688	0.829815
	TCP_TFL_001_001-2	atency to tail flick	14	14	0.76868	0.968425	0.461827	-0.526448	1.08079	0.861569
	TCP_TFL_001_001-3	atency to tail flick	13	14	0.671819	0.581608	0.541723	-0.415741	1.26872	0.899703
