# Supplementary material for: Sexual Dimorphism of the Mouse Plasma Metabolome Is Associated with Phenotypes of 30 Gene Knockout Lines
Source: Metabolites. 2023 Aug 15;13(8):947. doi: 10.3390/metabo13080947 (PMC10456929; doi:10.3390/metabo13080947)
Supplement: Supplementary file 1 [file metabolites-13-00947-s001.zip › Supplementary Data S5_Knockout 2-way ANOVA (data for Figure 3)_Zhang et al_KOMP_08-2023.xlsx]

## Sheet: Legend
Sexual Dimorphism of the Mouse Plasma Metabolome Is Associated with Phenotypes of 30 Gene Knockout Lines
Ying Zhang 1,2, Dinesh K. Barupal 3, Sili Fan 1, Bei Gao 4, Chao Zhu 5, Ann M. Flenniken 6,7, Colin McKerlie 6,8, Lauryl M. J. Nutter 6,8, Kevin C. Kent Lloyd 9 and Oliver Fiehn 1,*
1	West Coast Metabolomics Center, University of California Davis, Davis, CA 95616, USA; ofiehn@ucdavis.edu (O.F.) ythzhang@ucdavis.edu (Y.Z.); slfan@ucdavis.edu (S.F.)
2	Department of Chemistry, University of California, Davis, Davis, CA 95616, USA
3	Department of Environmental Medicine and Public Health, Icahn School of Medicine at Mount Sinai, New York, NY 10029, USA; dinesh.barupal@mssm.edu
4	School of Marine Sciences, Nanjing University of Information Science and Technology,Nanjing 210044, China; wintergb2012@gmail.com
5	College of Medicine & Nursing, Dezhou University, Dezhou 253023, China; zhuchao@dzu.edu.cn
6	The Centre for Phenogenomics, Toronto, ON M5T 3H7, Canada; flenniken@lunenfeld.ca (A.M.F.); colin.mckerlie@sickkids.ca (C.M.); lauryl.nutter@sickkids.ca (L.M.J.N.)
7	Lunenfeld-Tanenbaum Research Institute, Mount Sinai Hospital, Toronto, ON M5G 1X5, Canada
8	The Hospital for Sick Children, Toronto, ON M5G 1X8, Canada
9	Department of Surgery, School of Medicine, and Mouse Biology Program, University of California, Davis, Davis, CA 95616, USA; kclloyd@ucdavis.edu
	*Correspondence: ofiehn@ucdavis.edu
Spredsheet	Output
classification_KO metabolomics	Two-way ANOVA for Genotype Effect and Genotype-Sex Interaction Effect on Metabolomics Data of 30 KO lines
summary_KO metabolomics	Summary of Genotype Effect and Genotype-Sex Interaction Effect on Metabolomics Data of 30 KO lines (for Figure 3a & 3c).
summary exclude lipids	Summary of Genotype Effect and Genotype-Sex Interaction Effect on Metabolomics Data of 30 KO lines after excluding lipids (for Figure 3c).
	Classification of metabolites with significant genotype effect
	Percentage of metabolites with significant genotype-sex interaction effect of total metabolites, highlighted if >10%
	number of metabolites with significant genotype-sex interaction effect, excluding or including lipidomics, for Figure 3c

## Sheet: classification_KO metabolomics
SI Data 5a. Genotype Effect and Genotype-Sex Interaction Effect on Metabolomics Data of 30 KO lines
long column names	label	Analysis assay/platform	Metabolite annotation	Normality before data transformation	Normality after data transformation for males&females	Normality after data transformation for females	Normality after data transformation for males	number of wildtype mice	number pf mice per genotype	pvalue for Genotype effect	pvalue for Sex effect	pvalue for genotype-sex interaction	fdr for Genotype effect	fdr for Sex effect	fdr for genotype-sex interaction	pvalue for genotype effect without sex adjustment	estimate for genotype effect without sex adjustment	pvalue for genotype effect by KO vs. wildtype mice in females	estimate for genotype effect by KO vs. wildtype mice in females	pvalue for genotype effect by KO vs. wildtype mice in males	estimate for genotype effect by KO vs. wildtype mice in males	fdr for genotype effect by KO vs. wildtype mice in females	fdr for genotype effect by KO vs. wildtype mice in males	foldchange of Metabolite value by KO vs.wildtype mice without separating by sex	foldchange of Metabolite value by KO vs.wildtype mice in females	foldchange of Metabolite value by KO vs.wildtype mice in males	pvalue for sex effect in wildtype mice (male vs. female)	estimate for sex effect in wildtype mice (male vs. female)	fdr for sex effect in wildtype mice (male vs. female)	pvalue for sex effect in KO mice (male vs. female)	estimate for sex effect in KO mice (male vs. female)	fdr for sex effect in KO mice (male vs. female)	Genotype	direction of estimate value
short column names	label	assay	Metabolite	Normality_before	Normality_after	Normality_F	Normality_M	numb_null	numb_gene	pvalue_Stage1	pvalue_stage1.5	pvalue_stage2	fdr_Stage1	fdr_Stage1.5	fdr_Stage2	sep_allKO_pval	sep_allKO_estimate	sep_FvKO_pval	sep_FvKO_estimate	sep_MvKO_pval	sep_MvKO_estimate	sep_FvKO_fdr	sep_MvKO_fdr	foldchange_all	foldchange_FvKO	foldchange_MvKO	ctrl_sex_pval	ctrl_sex_estimate	fdr_ctrl_sex	KO_sex_pval	KO_sex_estimate	fdr_KO_sex	Genotype	est_dirct
15	ONLI_0019	gctof	succinic acid	0.311682	1	0.990787	0.993612	38	6	0.00911706	0.0616228	0.0698276	0.0879463	0.096522	0.550666	0.0146451	1.03191	0.0059909	1.70916	0.511927	0.354669	0.128076	0.809869	1.33757	1.62596	1.1112	0.0242889	0.682706	0.045963	0.288809	-0.671782	0.486823	A2m	Genotype effect with no sex effect(real)
17	ONLI_0022	gctof	saccharic acid	0.00110769	1	0.827519	0.935125	36	6	0.00896852	0.0500101	0.791216	0.0875815	0.0804025	0.937685	0.0112575	1.07066	0.0298173	1.17005	0.12896	0.971271	0.228985	0.680047	1.23441	1.34473	1.14379	0.0846752	0.555579	0.138671	0.274429	0.356798	0.468917	A2m	Genotype effect with no sex effect(real)
25	ONLI_0031	gctof	pimelic acid	0.431776	1	0.974038	0.957094	38	6	0.0208127	0.177262	0.0217317	0.136802	0.241333	0.404607	0.0247708	0.954122	0.474402	0.398633	0.016119	1.5227	0.717498	0.463047	1.28568	1.1033	1.45678	0.418054	0.248626	0.524058	0.0621208	1.37269	0.167822	A2m	One sex_Male only
33	ONLI_0042	gctof	ornithine	0.744384	1	0.242789	0.375356	39	6	0.0305834	0.322307	0.108639	0.158114	0.405318	0.569097	0.0355792	0.895528	0.270064	0.659704	0.073144	1.12261	0.562823	0.634574	1.2925	1.20667	1.3842	0.267053	-0.340918	0.368011	0.887493	0.121987	0.943013	A2m	Genotype effect with no sex effect(real)
34	ONLI_0044	gctof	octadecanol	0.0123294	1	0.691635	0.662163	36	6	0.00456147	0.00522601	0.00118937	0.0697819	0.0102068	0.313598	0.6115	-0.222988	0.0146433	-1.5086	0.0642256	1.08388	0.171926	0.634574	0.974989	0.647705	1.34722	0.228053	-0.382616	0.325027	0.00335181	2.20987	0.0581214	A2m	One sex_Female only
50	ONLI_0062	gctof	isohexonic acid	0.000380572	1	0.827683	0.86332	39	6	0.0453719	0.0217072	0.607327	0.18989	0.0379877	0.859722	0.0703545	0.776202	0.0649716	0.981903	0.353594	0.588488	0.311056	0.77118	1.12179	1.27108	1.01341	0.0275931	0.701498	0.051115	0.327116	0.308082	0.523834	A2m	Genotype effect with no sex effect(real)
52	ONLI_0064	gctof	inosine	1.30019e-05	1	0.57038	0.129229	35	5	0.00309242	0.00160801	0.527269	0.0627206	0.0034284	0.844898	0.0208741	1.06337	0.115618	0.952301	0.00808764	1.42153	0.382651	0.309692	2.59428	2.11725	3.22776	0.00242473	0.89389	0.00579444	0.146783	1.36312	0.296946	A2m	Genotype effect with no sex effect(real)
54	ONLI_0066	gctof	indole-3-propionic acid	0.213701	1	0.749437	0.986641	38	6	0.0257286	0.118192	0.0420901	0.142317	0.171856	0.488613	0.030296	0.922602	0.333878	0.711821	0.00338059	1.16093	0.61583	0.21948	1.39355	1.26491	1.58303	0.104071	-0.523408	0.166641	0.832512	-0.0742998	0.908944	A2m	One sex_Male only
55	ONLI_0067	gctof	indole-3-lactate	0.592872	1	0.99994	0.995671	37	6	0.0467998	1.7534e-05	0.0585935	0.191806	5.4604e-05	0.526676	0.113805	0.683381	0.915556	0.0574861	0.00414502	1.2739	0.970784	0.234194	1.18522	1.01624	1.41453	1.2235e-05	-1.30883	4.63056e-05	0.788367	-0.0924158	0.888316	A2m	Genotype effect with no sex effect(real)
61	ONLI_0073	gctof	hexuronic acid	4.73461e-06	1	0.797369	0.718026	34	6	0.017395	0.64028	0.0934723	0.126233	0.708338	0.569097	0.021278	-0.982135	0.0191684	-0.771367	0.107536	-1.21441	0.191739	0.634574	0.68412	0.839953	0.5717	0.718709	-0.121875	0.796217	0.39815	-0.564918	0.589762	A2m	Genotype effect with no sex effect(real)
69	ONLI_0082	gctof	glycerol	8.7891e-09	1	0.785032	0.970418	39	6	1.49066e-06	0.512387	0.599082	0.000341254	0.599553	0.859722	2.8936e-06	1.808	0.00416888	1.63391	0.000323417	1.97717	0.113535	0.0522107	2.78401	2.71835	2.84933	0.463328	-0.19181	0.57354	0.682488	0.151453	0.81548	A2m	Genotype effect with no sex effect(real)
78	ONLI_0093	gctof	dodecanol	0.109043	1	0.98393	0.731806	39	6	0.0263053	0.174252	0.0307659	0.1435	0.238466	0.428983	0.0308292	0.918734	0.546368	0.39932	0.00577355	1.45185	0.775279	0.28543	1.18732	1.06527	1.32984	0.0889476	-0.534507	0.144769	0.257497	0.518027	0.456681	A2m	One sex_Male only
85	ONLI_0102	gctof	caprylic acid	0.107454	1	0.763976	0.876999	40	6	0.00276814	0.677354	0.610707	0.0606522	0.737999	0.859722	0.00361089	1.2108	0.0361311	1.4062	0.0547296	1.0154	0.253553	0.608206	1.30194	1.34369	1.25928	0.839465	-0.0568513	0.891298	0.670925	-0.447649	0.808245	A2m	Genotype effect with no sex effect(real)
87	ONLI_0104	gctof	beta-alanine	0.468223	1	0.807715	0.847913	37	6	0.000144744	0.0913631	0.284731	0.0127214	0.138711	0.705928	0.000225512	-1.49166	0.0522228	-1.14236	0.000573025	-1.88308	0.289736	0.0566579	0.614995	0.674187	0.556931	0.0745457	0.519536	0.125062	0.501338	-0.221184	0.667607	A2m	Genotype effect with no sex effect(real)
94	ONLI_0115	gctof	6-deoxyglucitol	0.723943	1	0.769447	0.962164	39	6	0.00719766	0.682048	0.0593993	0.0790837	0.74209	0.52792	0.00899794	1.0976	0.0993559	1.02808	0.0511909	1.16473	0.356586	0.60426	1.28677	1.28989	1.28235	0.75419	0.0935326	0.827412	0.795002	0.230181	0.893248	A2m	Genotype effect with no sex effect(real)
96	ONLI_0117	gctof	4-hydroxybutyric acid	0.858387	1	0.810796	0.891002	40	5	0.0332597	0.66642	0.177582	0.164428	0.72879	0.667394	0.0385343	0.954397	0.229061	0.86772	0.0998713	1.04243	0.515387	0.634574	1.29914	1.25333	1.3454	0.557358	-0.181522	0.660076	0.99352	-0.00680741	0.999605	A2m	Genotype effect with no sex effect(real)
97	ONLI_0118	gctof	3-hydroxypropionic acid	0.00805065	1	0.91931	0.997771	39	6	0.037006	0.866378	0.220592	0.177036	0.893488	0.6764	0.0426522	0.86526	0.0795527	0.92342	0.254168	0.808082	0.340142	0.750396	1.16661	1.16767	1.16556	0.904324	-0.0383601	0.931406	0.807431	-0.153698	0.89702	A2m	Genotype effect with no sex effect(real)
99	ONLI_0120	gctof	3-aminoisobutyric acid	0.661071	1	0.83108	0.933831	39	6	0.00380709	0.285821	0.0205104	0.0684411	0.36348	0.404607	0.00491515	-1.17451	0.047668	-1.05241	0.0504081	-1.28813	0.283194	0.60426	0.556903	0.525602	0.586236	0.269758	0.330971	0.371094	0.890557	0.0952537	0.943013	A2m	One sex_Female only
100	ONLI_0121	gctof	3,6-anhydro-D-galactose	4.04574e-08	1	0.971409	0.989482	38	6	1.59353e-06	0.0617924	0.505272	0.000341254	0.0965963	0.84042	3.12861e-06	1.80097	0.00197326	1.60419	0.000430479	2.02246	0.104057	0.0566579	2.52024	2.27432	2.81146	0.07045	-0.469156	0.119073	0.89233	-0.0508861	0.9432	A2m	Genotype effect with no sex effect(real)
101	ONLI_0122	gctof	3-3-hydroxyphenylpropionic acid	2.5328e-06	0.998675	0.954302	0.872424	40	6	0.0781026	0.035904	0.0455753	0.241928	0.0600424	0.493836	0.0866443	-0.73206	0.35532	-0.562178	0.116353	-0.901943	0.629603	0.642637	0.195106	0.196231	0.193091	0.0818248	-0.538798	0.13484	0.150629	-0.878562	0.303175	A2m	Interaction_cannot classify2
106	ONLI_0127	gctof	2-aminobutyric acid	0.285187	1	0.98356	0.917126	40	5	0.0664455	0.00389601	0.0264268	0.21991	0.00782169	0.420104	0.621495	-0.233171	0.0640956	-1.07591	0.241018	0.807212	0.310427	0.750396	0.886189	0.637904	1.31604	0.00325543	-0.894895	0.00742089	0.275282	0.988227	0.469285	A2m	Interaction_cannot classify2
111	ONLI_0158	CSHPOS	AC 14:1	0.00542709	1	0.471815	0.813565	39	6	0.0166373	0.208999	0.170078	0.123039	0.2802	0.662717	0.0199448	-0.985977	0.0471912	-1.51177	0.212805	-0.447887	0.283194	0.747833	0.572772	0.460178	0.735877	0.112073	-0.479608	0.176594	0.464856	0.584274	0.638196	A2m	Genotype effect with no sex effect(real)
112	ONLI_0159	CSHPOS	TAG 54:7; TAG 18:2-18:2-18:3;	0.0015598	1	0.786214	0.74849	39	6	0.00620095	0.00746792	0.378311	0.0726104	0.014303	0.794892	0.0142189	1.03509	0.00694644	1.36585	0.244789	0.724284	0.137366	0.750396	1.85091	2.58911	1.50646	0.00932109	0.778192	0.0189537	0.812419	0.136629	0.900033	A2m	Genotype effect with no sex effect(real)
114	ONLI_0161	CSHPOS	DAG 36:2; DAG 18:0-18:2;	0.0269719	1	0.333924	0.967255	40	6	0.0134185	0.000115226	0.867158	0.112915	0.000314289	0.953219	0.0427183	0.864006	0.08576	0.807493	0.107285	0.920519	0.340885	0.634574	1.35174	1.33116	1.36528	0.000581175	1.00436	0.00157976	0.00328778	1.11739	0.0581214	A2m	Genotype effect with no sex effect(real)
122	ONLI_0170	CSHPOS	PC35:3	0.00313339	1	0.182824	0.182824	40	6	0.0806423	2.35462e-12	0.0271203	0.244399	1.14779e-10	0.420631	0.822948	0.0976368	0.0784538	0.635646	0.232111	-0.440373	0.337266	0.750396	1.01761	1.27748	0.894618	3.4375e-11	1.70622	6.3224e-09	0.0642098	0.630203	0.168389	A2m	Interaction_cannot classify2
126	ONLI_0175	CSHPOS	TAG 60:13; TAG 18:2-20:5-22:6;	0.0166974	1	0.83448	0.928777	40	6	0.0434948	0.0538261	0.037656	0.189794	0.085667	0.480418	0.0495944	-0.838336	0.307222	-0.629223	0.0676075	-1.04745	0.592715	0.634574	0.681593	0.726871	0.62306	0.0886802	-0.48579	0.144631	0.437754	-0.904015	0.619661	A2m	cannot classify
128	ONLI_0177	CSHPOS	DAG 36:3; DAG 18:1-18:2;	0.056163	1	0.479796	0.787262	40	6	0.04929	1.01528e-05	0.553907	0.196084	3.31854e-05	0.849408	0.124598	0.661331	0.054735	0.855896	0.399475	0.466766	0.297934	0.782311	1.23018	1.30932	1.17865	4.5179e-05	1.19017	0.000154704	0.0434187	0.801044	0.142504	A2m	Genotype effect with no sex effect(real)
136	ONLI_0185	CSHPOS	PCo-44:5	0.0451206	1	0.990172	0.891972	33	6	0.0630722	0.066474	0.0309128	0.215043	0.103506	0.428983	0.376555	0.389366	0.0364107	1.27676	0.443669	-0.481758	0.253553	0.786962	1.05097	1.2513	0.876299	0.118629	0.536826	0.185081	0.122781	-1.22169	0.263124	A2m	Interaction_One sex_Female only2
137	ONLI_0186	CSHPOS	PEo-36:3	0.0394056	1	0.714687	0.946215	38	6	0.00595304	1.04299e-07	0.50922	0.0726104	4.85297e-07	0.84042	0.0481806	0.845443	0.00980317	1.0392	0.202626	0.651682	0.158251	0.739215	1.21936	1.26251	1.18812	2.37469e-06	1.32542	1.06726e-05	0.0219117	0.937901	0.0962896	A2m	Genotype effect with no sex effect(real)
138	ONLI_0187	CSHPOS	TAG 60:2; TAG 18:1-20:1-22:0;	2.36746e-05	1	0.166759	0.518981	35	6	0.00822764	0.00342276	0.622734	0.0845203	0.00695991	0.8616	0.0239786	0.962704	0.126395	0.800515	0.0494	1.14763	0.397918	0.60426	1.64525	1.39641	1.79738	0.0115669	0.795745	0.0231047	0.0168444	1.14286	0.0848656	A2m	Genotype effect with no sex effect(real)
139	ONLI_0188	CSHPOS	Zymosterol	6.4288e-06	1	0.919355	0.987078	35	6	0.0280777	0.0347695	0.0095887	0.15212	0.0583921	0.329385	0.522936	-0.280764	0.0165762	-1.33349	0.2479	0.780026	0.17427	0.750396	0.802432	0.23942	1.41208	0.387073	-0.282185	0.492719	0.0406903	1.83133	0.138733	A2m	One sex_Female only
142	ONLI_0191	CSHPOS	TAG 54:1; TAG 18:0-18:0-18:1;	4.40793e-07	1	0.739541	0.99953	38	6	0.0230875	1.41063e-09	0.76674	0.137887	1.01437e-08	0.929686	0.15251	0.619029	0.178646	0.540603	0.0934801	0.697455	0.45437	0.634574	1.75762	1.33639	1.86252	7.0671e-08	1.43479	4.77784e-07	0.00443353	1.59164	0.061525	A2m	Genotype effect with no sex effect(real)
145	ONLI_0194	CSHPOS	LPE18:2	0.554245	1	0.896588	0.975462	39	5	0.00117098	0.220666	0.634271	0.0441071	0.29385	0.868301	0.00161719	1.40803	0.0150433	1.60976	0.0492007	1.22154	0.171926	0.60426	1.50119	1.58787	1.42312	0.217288	0.357953	0.311932	0.969435	-0.0302705	0.984369	A2m	Genotype effect with no sex effect(real)
147	ONLI_0196	CSHPOS	PCo-36:3	0.546245	1	0.999999	0.614157	39	6	8.76098e-05	9.61376e-10	0.858989	0.00866242	7.17404e-09	0.953219	0.00750229	1.12147	0.0175152	1.05866	0.00360712	1.15026	0.179929	0.21948	1.28236	1.34681	1.22741	7.65596e-08	1.32675	5.13209e-07	0.0386144	1.41835	0.135519	A2m	Genotype effect with no sex effect(real)
148	ONLI_0197	CSHPOS	TAG 48:3; TAG 12:0-18:1-18:2;	2.09808e-05	1	0.304704	0.99077	38	6	0.00430369	1.71268e-06	0.958033	0.0697819	6.45108e-06	0.982884	0.0360111	0.894612	0.0435406	0.87888	0.0704106	0.910343	0.273339	0.634574	1.87625	1.75433	1.91563	1.31821e-05	1.22928	4.96526e-05	0.000178783	1.26074	0.0352288	A2m	Genotype effect with no sex effect(real)
150	ONLI_0199	CSHPOS	TAG 48:3; TAG 14:0-16:0-18:3;	0.000668916	1	0.277637	0.972704	39	6	0.01521	1.27862e-06	0.860759	0.120311	4.94023e-06	0.953219	0.0669967	0.785303	0.107305	0.715917	0.103505	0.823496	0.370649	0.634574	1.64347	1.61603	1.62595	1.68362e-05	1.21655	6.22309e-05	0.00118575	1.32413	0.0446632	A2m	Genotype effect with no sex effect(real)
151	ONLI_0200	CSHPOS	TAG 50:3; TAG 16:0-16:1-18:2;	3.33663e-05	1	0.3648	0.9965	40	6	0.0445708	2.33298e-07	0.999037	0.189794	1.03094e-06	0.999629	0.148015	0.623875	0.155967	0.624241	0.202284	0.623508	0.431363	0.739215	1.56825	1.4848	1.59439	4.20269e-06	1.28749	1.77772e-05	0.00399785	1.28676	0.0589455	A2m	Genotype effect with no sex effect(real)
155	ONLI_0205	CSHPOS	TAG 56:3; TAG 18:1-18:1-20:1;	1.12103e-05	1	0.505609	0.917727	38	6	0.0368344	9.76442e-11	0.981903	0.177036	9.4191e-10	0.991597	0.21469	0.538478	0.165799	0.532771	0.163183	0.544185	0.444566	0.70922	1.51602	1.33421	1.55721	9.75464e-09	1.5159	8.76809e-08	0.000264685	1.52732	0.0352288	A2m	Genotype effect with no sex effect(real)
156	ONLI_0206	CSHPOS	TAG 52:5; TAG 16:0-18:2-18:3;	0.0140742	1	0.70741	0.892305	39	6	0.00774619	0.000223056	0.533707	0.0816965	0.000580385	0.844898	0.0264061	0.943215	0.0154224	1.16998	0.202785	0.741887	0.171926	0.739215	1.59505	2.06568	1.38143	0.000915253	0.992141	0.00241322	0.0507173	0.564047	0.153885	A2m	Genotype effect with no sex effect(real)
158	ONLI_0208	CSHPOS	TAG 46:2; TAG 12:0-16:0-18:2;	0.000685236	1	0.908601	0.97853	38	6	0.00341991	1.60951e-05	0.610775	0.0659792	5.07219e-05	0.859722	0.0237177	0.960858	0.0974434	0.802089	0.0251825	1.11963	0.353874	0.507641	1.9507	1.73721	2.0442	0.000116587	1.09396	0.000363073	0.00166414	1.4115	0.0526533	A2m	Genotype effect with no sex effect(real)
159	ONLI_0209	CSHPOS	TAG 51:1; TAG 16:0-17:0-18:1;	0.00165772	1	0.905538	0.989943	38	6	0.0128101	8.3775e-05	0.671154	0.110139	0.000235822	0.886282	0.0466199	0.851139	0.033437	1.02299	0.195911	0.734346	0.247184	0.737932	1.56616	1.8508	1.47161	0.000544604	1.04608	0.00149577	0.0394049	0.757438	0.135519	A2m	Genotype effect with no sex effect(real)
162	ONLI_0212	CSHPOS	TAG 56:2; TAG 16:0-18:1-22:1;	6.36089e-06	1	0.49757	0.827436	37	6	0.00326244	5.49411e-12	0.648004	0.0645147	1.17455e-10	0.877002	0.09837	0.713265	0.02048	0.842447	0.103604	0.626271	0.192853	0.634574	1.74122	1.74932	1.77571	1.77353e-09	1.56096	2.2514e-08	0.00280642	1.34478	0.0581214	A2m	Genotype effect with no sex effect(real)
163	ONLI_0213	CSHPOS	PC40:4	0.292338	1	0.995636	0.86128	39	6	0.223153	0.0141419	0.0231267	0.433695	0.0257154	0.404607	0.236443	0.513406	0.968589	-0.0199618	0.115781	1.03286	0.990148	0.642637	1.08534	0.98136	1.17439	0.0808412	0.542509	0.133498	0.0253831	1.59533	0.105036	A2m	Interaction_cannot classify2
167	ONLI_0218	CSHPOS	SMd40:2 A	7.7204e-05	1	0.182824	0.182824	40	6	0.0218492	3.19235e-12	0.279645	0.136802	1.14779e-10	0.705928	0.196753	0.558074	0.413673	0.304045	0.0209827	0.812103	0.668652	0.50295	1.22057	1.06275	1.27033	3.15671e-10	1.4996	1.00678e-08	0.00867949	2.00766	0.0687972	A2m	Genotype effect with no sex effect(real)
168	ONLI_0220	CSHPOS	PC 36:4; PC 18:2-18:2;	0.0159536	1	0.565178	0.938134	40	6	0.0411683	4.85845e-07	0.273146	0.188232	2.00158e-06	0.704522	0.127939	0.655682	0.023837	0.99741	0.539121	0.313954	0.209501	0.816944	1.36906	1.69966	1.20471	3.91702e-06	1.31759	1.66579e-05	0.0514599	0.634139	0.153885	A2m	Genotype effect with no sex effect(real)
169	ONLI_0221	CSHPOS	DAG 34:2; DAG 16:1-18:1;	0.0822217	1	0.648511	0.999951	38	6	0.0142432	3.68015e-08	0.480192	0.114963	1.87806e-07	0.832953	0.101537	0.705791	0.024676	0.947649	0.261221	0.536614	0.21216	0.750396	1.22996	1.35788	1.17418	9.988e-07	1.38093	5.0811e-06	0.0204164	0.969895	0.0914433	A2m	Genotype effect with no sex effect(real)
172	ONLI_0224	CSHPOS	PC16:0/9:0COOH	0.00501166	1	0.760653	0.723256	39	6	0.000789678	0.166107	0.878811	0.0312318	0.229694	0.957493	0.00110498	1.34145	0.0122614	1.40208	0.035548	1.29017	0.167776	0.584014	2.19245	2.32137	2.10299	0.219872	0.364303	0.3145	0.52412	0.252386	0.688669	A2m	Genotype effect with no sex effect(real)
174	ONLI_0226	CSHPOS	TAG 50:5; TAG 14:0-18:2-18:3;	0.00628761	1	0.899616	0.999817	38	6	0.00418404	3.62742e-08	0.892869	0.0697819	1.86317e-07	0.960593	0.0438388	0.861683	0.0398726	0.900326	0.076703	0.82304	0.265036	0.634574	1.50414	1.63612	1.44613	1.00834e-06	1.31228	5.0811e-06	0.0828172	1.23499	0.202186	A2m	Genotype effect with no sex effect(real)
178	ONLI_0230	CSHPOS	LPC 22:4	0.987919	1	0.716713	0.529484	39	6	0.0204731	0.13403	0.0442381	0.136802	0.191714	0.489616	0.0242923	0.956134	0.210008	0.758115	0.0558545	1.14465	0.495871	0.608206	1.23207	1.18305	1.27398	0.213886	0.37044	0.30873	0.425295	0.756978	0.612765	A2m	cannot classify
182	ONLI_0234	CSHPOS	AC 18:1	0.0164577	1	0.659978	0.506554	39	6	0.046411	0.45381	0.2643	0.191488	0.540608	0.700337	0.0529078	-0.827994	0.0996277	-1.2718	0.328913	-0.375829	0.356586	0.754252	0.669725	0.499182	0.892541	0.296965	-0.326022	0.401537	0.460105	0.569949	0.635819	A2m	Genotype effect with no sex effect(real)
184	ONLI_0236	CSHPOS	CE (16:1)	0.00701342	1	0.985306	0.999764	36	6	0.0220965	4.90464e-06	0.00592099	0.136802	1.69414e-05	0.329385	0.803666	0.109278	0.091784	-0.832189	0.0500133	1.0035	0.34572	0.60426	1.17391	0.489147	1.55234	0.00176761	0.850334	0.00434218	0.0166666	2.68603	0.0848098	A2m	cannot classify
186	ONLI_0238	CSHPOS	TAG 46:3; TAG 12:0-16:1-18:2;	0.00326988	1	0.990447	0.999698	30	6	0.00271319	0.00274644	0.127893	0.0606522	0.00564268	0.592299	0.018432	1.00948	0.000914643	1.67629	0.283825	0.621309	0.0951023	0.750396	1.68708	2.95656	1.36698	0.00297621	1.04488	0.00686769	0.974537	-0.0101057	0.988015	A2m	Genotype effect with no sex effect(real)
189	ONLI_0241	CSHPOS	TAG 48:2; TAG 14:0-16:0-18:2;	1.20768e-06	1	0.332799	0.925778	38	6	0.000770412	9.54524e-06	0.398841	0.0312318	3.1329e-05	0.800414	0.00852891	1.1057	0.0693784	0.825632	0.0082219	1.3289	0.320546	0.309692	2.59938	1.83907	2.77124	6.65825e-05	1.08027	0.000221289	0.00610572	1.58354	0.0643797	A2m	Genotype effect with no sex effect(real)
191	ONLI_0244	CSHPOS	TAG 54:2; TAG 18:0-18:1-18:1;	5.21363e-07	1	0.303278	0.720524	39	6	0.0420859	1.55586e-05	0.703253	0.189794	4.92275e-05	0.900979	0.119207	0.671628	0.231876	0.560183	0.132	0.811282	0.519586	0.680593	1.52279	1.23404	1.64849	0.000170793	1.10013	0.000517615	0.0066395	1.35123	0.0666463	A2m	Genotype effect with no sex effect(real)
192	ONLI_0245	CSHPOS	TAG 50:3; TAG 16:0-16:0-18:3;	0.0755688	1	0.305762	0.965701	40	6	0.0499824	3.79312e-07	0.945162	0.196084	1.6131e-06	0.976491	0.153553	0.615669	0.146897	0.636823	0.234228	0.594514	0.423523	0.750396	1.33007	1.38789	1.30089	6.38344e-06	1.27597	2.58939e-05	0.000869678	1.23366	0.0382175	A2m	Genotype effect with no sex effect(real)
196	ONLI_0250	CSHPOS	TAG 48:4; TAG 12:0-18:1-18:3;	0.0343841	1	0.936126	0.998858	39	6	0.00632512	6.91832e-06	0.386118	0.0726104	2.31881e-05	0.797439	0.0290755	0.928078	0.00973305	1.19001	0.2371	0.63598	0.158251	0.750396	1.59994	2.10799	1.3452	4.25623e-05	1.17653	0.000147017	0.104861	0.622505	0.234309	A2m	Genotype effect with no sex effect(real)
198	ONLI_0252	CSHPOS	CE (20:4)	0.0245592	1	0.65244	0.969453	40	6	0.0428048	0.945235	0.0887169	0.189794	0.959796	0.566331	0.0488446	-0.840989	0.00144277	-1.52123	0.82333	-0.160745	0.0951023	0.92059	0.784798	0.670878	0.898824	0.606108	-0.158673	0.70195	0.0898249	1.20182	0.212729	A2m	Genotype effect with no sex effect(real)
200	ONLI_0254	CSHPOS	TAG 50:4; TAG 14:0-18:2-18:2;	0.000238416	1	0.327575	0.984276	39	6	0.0441767	4.56978e-07	0.691564	0.189794	1.89251e-06	0.900319	0.155306	0.614005	0.0850882	0.752184	0.306341	0.509414	0.340885	0.754252	1.35177	1.46026	1.33149	3.47475e-06	1.30991	1.50193e-05	0.063168	1.06714	0.167822	A2m	Genotype effect with no sex effect(real)
202	ONLI_0256	CSHPOS	TAG 58:4; TAG 18:1-18:2-22:1;	0.00210323	1	0.560757	0.98252	37	6	0.00126059	3.07698e-11	0.797388	0.045324	3.74445e-10	0.937685	0.0464798	0.852782	0.0479195	0.770747	0.0205433	0.895372	0.283194	0.50295	1.65265	1.90275	1.55425	7.77436e-09	1.45946	7.32086e-08	0.0163154	1.58408	0.0843046	A2m	Genotype effect with no sex effect(real)
205	ONLI_0259	CSHPOS	TAG 53:3; TAG 17:0-18:1-18:2;	0.000978075	1	0.374334	0.86378	39	6	0.0293	1.26529e-05	0.578504	0.153485	4.1187e-05	0.849408	0.0963475	0.715356	0.0468719	0.91153	0.307348	0.549739	0.283194	0.754252	1.33507	1.56806	1.24368	5.4394e-05	1.1917	0.00018466	0.00304888	0.829912	0.0581214	A2m	Genotype effect with no sex effect(real)
207	ONLI_0261	CSHPOS	TAG 58:6; TAG 18:1-20:1-20:4;	0.00120562	1	0.300181	0.89809	38	6	0.0448691	1.54627e-05	0.719945	0.189794	4.92275e-05	0.914087	0.11806	0.674649	0.227272	0.556893	0.145774	0.792404	0.515387	0.694624	1.36121	1.25899	1.41326	0.000184149	1.10702	0.000553848	0.00746638	1.34253	0.0682893	A2m	Genotype effect with no sex effect(real)
209	ONLI_0263	CSHPOS	PC34:2	0.0568484	1	0.775816	0.947589	40	6	0.0221976	6.41997e-10	0.540462	0.136802	5.02792e-09	0.844898	0.148488	0.623165	0.0492764	0.784909	0.266202	0.46142	0.284508	0.750396	1.1531	1.22292	1.10691	1.1285e-08	1.49852	9.70266e-08	0.0131634	1.17503	0.0791995	A2m	Genotype effect with no sex effect(real)
211	ONLI_0265	CSHPOS	LPE20:4	0.791529	1	0.947095	0.882574	36	4	0.0262082	0.340564	0.100039	0.1435	0.424464	0.569097	0.0313373	1.0975	0.0903141	1.34656	0.206378	0.848433	0.345236	0.745411	1.29396	1.34164	1.24347	0.459855	-0.239605	0.570134	0.269785	-0.737733	0.465938	A2m	Genotype effect with no sex effect(real)
212	ONLI_0266	CSHPOS	TAG 49:3; TAG 15:0-16:1-18:2;	0.000638796	1	0.84678	0.906491	39	6	0.0250004	7.84434e-08	0.534575	0.140365	3.83017e-07	0.844898	0.128721	0.655298	0.0503921	0.85382	0.284826	0.492307	0.284716	0.750396	1.40559	1.83236	1.29538	7.13372e-07	1.38571	3.71235e-06	0.0069886	1.02419	0.0682893	A2m	Genotype effect with no sex effect(real)
213	ONLI_0267	CSHPOS	TAG 48:0; TAG 14:0-16:0-18:0;	0.00388392	1	0.492337	0.946049	38	6	0.00507507	0.33964	0.0162991	0.0716853	0.424416	0.379193	0.00649275	1.14085	0.103248	0.723891	0.0273602	1.5671	0.366231	0.507641	1.5228	1.29919	1.7237	0.560728	0.176665	0.662984	0.135497	1.01988	0.279825	A2m	One sex_Male only
214	ONLI_0268	CSHPOS	TAG 58:2; TAG 18:0-18:2-22:0;	4.13564e-06	1	0.879408	0.997942	36	6	0.0224906	0.000278785	0.405822	0.136847	0.000717026	0.806546	0.060791	0.80647	0.314753	0.522917	0.0434203	1.09002	0.595845	0.60426	1.95248	1.2721	2.2578	0.00204521	0.923738	0.00497773	0.0413036	1.49084	0.138935	A2m	Genotype effect with no sex effect(real)
215	ONLI_0269	CSHPOS	TAG 46:0; TAG 14:0-16:0-16:0;	0.0105165	1	0.995824	0.893213	36	6	0.00850326	0.0436908	0.00470506	0.0862317	0.0712663	0.329385	0.0107041	1.07751	0.168819	0.673771	0.0246752	1.48124	0.448198	0.507641	1.52289	1.22204	1.77223	0.124186	0.472376	0.192988	0.0555055	1.27984	0.160297	A2m	One sex_Male only
216	ONLI_0270	CSHPOS	TAG 50:2; TAG 16:0-16:0-18:2;	1.87197e-05	1	0.685021	0.98079	40	6	0.00440701	2.68629e-05	0.697699	0.0697819	8.17252e-05	0.900319	0.0242334	0.955508	0.0826359	0.830966	0.0394182	1.08005	0.340885	0.599611	1.80308	1.69946	1.84467	0.000152002	1.06158	0.000466021	0.00833609	1.31066	0.0687972	A2m	Genotype effect with no sex effect(real)
222	ONLI_0276	CSHPOS	PC 36:5; PC 16:0-20:5;	0.00020252	1	0.222287	0.942654	38	6	0.0448677	4.96187e-08	0.933738	0.189794	2.46939e-07	0.973105	0.197258	0.559171	0.167671	0.570846	0.189546	0.619057	0.448067	0.736189	1.30754	1.16484	1.41124	1.35063e-06	1.35964	6.5143e-06	0.00348476	1.40785	0.0581214	A2m	Genotype effect with no sex effect(real)
223	ONLI_0277	CSHPOS	PC38:3	0.00870784	1	0.561642	0.941028	38	6	0.020921	6.01128e-07	0.0108268	0.136802	2.45099e-06	0.329385	0.359831	0.399073	0.356589	-0.431515	0.0156024	1.17769	0.629603	0.463047	1.1948	0.872558	1.40374	0.00024217	0.987431	0.000704253	0.00348844	2.59664	0.0581214	A2m	One sex_Male only
224	ONLI_0278	CSHPOS	TAG 58:5; TAG 18:1-18:2-22:2;	3.37109e-05	1	0.147773	0.809654	38	6	0.0496564	5.18902e-10	0.427027	0.196084	4.10452e-09	0.817785	0.261766	0.48785	0.0448696	0.736378	0.45573	0.320648	0.278738	0.788616	1.21157	1.51679	1.20341	1.24954e-08	1.54517	1.02957e-07	0.00748761	1.12944	0.0682893	A2m	Genotype effect with no sex effect(real)
226	ONLI_0281	CSHPOS	TAG 49:1; TAG 15:0-16:0-18:1;	2.98264e-05	1	0.780953	0.968702	38	6	0.00595935	1.63522e-06	0.587845	0.0726104	6.18878e-06	0.855965	0.0429926	0.865	0.0201193	1.06596	0.155627	0.728428	0.191739	0.70724	1.54287	1.89587	1.45061	2.46618e-05	1.22347	8.90753e-05	0.00921934	0.885929	0.0687972	A2m	Genotype effect with no sex effect(real)
227	ONLI_0282	CSHPOS	PC38:2	1.14268e-05	1	0.182824	0.182824	40	6	0.00501114	2.16135e-13	0.763283	0.0716853	5.74858e-11	0.929686	0.117573	0.673592	0.0368629	0.742776	0.0955336	0.604408	0.253553	0.634574	1.19906	1.37378	1.16022	3.68024e-11	1.58392	6.3224e-09	0.0357057	1.44555	0.127797	A2m	Genotype effect with no sex effect(real)
230	ONLI_0285	CSHPOS	LPC 16:1	0.00152551	1	0.371246	0.961437	38	6	0.015563	2.37407e-07	0.379048	0.121885	1.04327e-06	0.794892	0.0876309	0.735178	0.265116	0.477807	0.0380475	0.992549	0.558469	0.592703	1.3288	1.16711	1.41991	4.4497e-06	1.23616	1.87219e-05	0.0223461	1.7509	0.0973558	A2m	Genotype effect with no sex effect(real)
234	ONLI_0289	CSHPOS	LPC 17:1	0.130268	1	0.93073	1	40	6	0.0346301	7.83305e-09	0.465704	0.170139	4.95675e-08	0.831066	0.157833	0.609473	0.0483327	0.814244	0.366624	0.404703	0.283194	0.77118	1.20329	1.39814	1.08343	7.97384e-08	1.44543	5.25609e-07	0.0392459	1.03588	0.135519	A2m	Genotype effect with no sex effect(real)
238	ONLI_0293	CSHPOS	TAG 51:4; TAG 15:0-16:0-20:4;	0.0213355	1	0.990976	0.993625	40	6	0.0167757	7.48522e-06	0.234083	0.123039	2.48773e-05	0.684402	0.0587205	0.808388	0.0102034	1.19518	0.431659	0.4216	0.161418	0.786962	1.35771	1.79861	1.13063	2.60707e-05	1.20745	9.37362e-05	0.288691	0.433872	0.486823	A2m	Genotype effect with no sex effect(real)
243	ONLI_0299	CSHPOS	TAG 51:4; TAG 16:0-17:2-18:2;	0.0219783	1	0.635765	0.935481	40	6	0.0383802	6.65989e-07	0.282626	0.181789	2.68774e-06	0.705928	0.120129	0.669069	0.020046	1.00605	0.526408	0.332091	0.191739	0.812146	1.33094	1.71139	1.15707	4.94287e-06	1.30379	2.06868e-05	0.0823256	0.629838	0.201719	A2m	Genotype effect with no sex effect(real)
248	ONLI_0304	CSHPOS	TAG 60:1; TAG 18:1-20:0-22:0;	0.000524249	1	0.426905	0.394842	22	6	0.560004	0.00494214	0.0160649	0.729812	0.00972445	0.379193	0.578028	-0.255274	0.129789	-0.7489	0.56297	0.365612	0.397918	0.829083	0.900034	0.509483	1.19737	0.0861064	0.699928	0.140723	0.025483	1.81444	0.105036	A2m	Interaction_cannot classify2
249	ONLI_0306	CSHPOS	PC35:2 A	0.011341	1	0.753851	0.999593	40	6	0.0464801	1.73465e-10	0.0723654	0.191488	1.52456e-09	0.550666	0.207978	0.544616	0.00736011	1.01725	0.865033	0.0719865	0.141996	0.933481	1.17143	1.36119	1.05781	2.31483e-09	1.58288	2.61576e-08	0.0343083	0.637624	0.125876	A2m	Genotype effect with no sex effect(real)
251	ONLI_0308	CSHPOS	CE (20:3)	1.37913e-05	1	0.832518	0.983395	37	6	0.0360083	5.84484e-05	0.0128866	0.175818	0.000169973	0.339778	0.592103	-0.23472	0.0319255	-1.11751	0.242781	0.62775	0.240505	0.750396	0.99274	0.554897	1.24771	0.00901249	0.751773	0.0183734	0.0075649	2.49703	0.0682893	A2m	One sex_Female only
252	ONLI_0310	CSHPOS	DAG 36:4; DAG 18:2-18:2;	0.232748	1	0.420364	0.845183	40	6	0.025177	2.84314e-05	0.38187	0.140365	8.58368e-05	0.794892	0.0695427	0.777375	0.019254	1.07157	0.397617	0.483178	0.191739	0.782311	1.24549	1.45687	1.10676	0.000130652	1.12752	0.000405276	0.0690688	0.539127	0.176807	A2m	Genotype effect with no sex effect(real)
254	ONLI_0312	CSHPOS	TAG 48:4; TAG 12:0-18:2-18:2;	0.00673382	1	0.677845	0.91265	39	6	0.0160752	3.1917e-05	0.487647	0.123039	9.59936e-05	0.832953	0.0548768	0.821517	0.0237412	1.06817	0.28014	0.603345	0.209501	0.750396	1.49188	1.89631	1.32036	0.000187051	1.11072	0.000560444	0.0385548	0.645901	0.135519	A2m	Genotype effect with no sex effect(real)
269	ONLI_0327	CSHPOS	PC33:1	0.000731208	1	0.259951	0.788679	40	6	0.0219916	3.50297e-12	0.445566	0.136802	1.17455e-10	0.820456	0.179934	0.579297	0.0367268	0.766159	0.311629	0.392435	0.253553	0.754252	1.26946	1.48837	1.1954	6.85884e-10	1.58097	1.21722e-08	0.000421245	1.20724	0.0352288	A2m	Genotype effect with no sex effect(real)
270	ONLI_0328	CSHPOS	TAG 54:5; TAG 18:0-18:2-18:3;	0.389496	1	0.989571	0.959806	39	6	0.00928482	0.0436968	0.00964522	0.0884855	0.0712663	0.329385	0.0114595	1.06512	0.0419926	1.04342	0.100216	1.07247	0.273339	0.634574	1.47824	1.54307	1.41992	0.0639736	0.55977	0.108824	0.342746	0.588819	0.538991	A2m	One sex_Female only
274	ONLI_0332	CSHPOS	PC35:4	0.0277769	1	0.818919	0.439503	39	6	0.0394783	1.31404e-11	0.11619	0.18369	1.96114e-10	0.579497	0.239179	0.510469	0.0115362	0.920854	0.719407	0.141826	0.166048	0.885018	1.09885	1.27682	1.00366	3.39149e-11	1.62796	6.3224e-09	0.288776	0.848928	0.486823	A2m	Genotype effect with no sex effect(real)
276	ONLI_0334	CSHPOS	TAG 46:1; TAG 14:0-16:0-16:1;	9.42854e-07	1	0.472721	0.723928	38	6	0.000596041	0.000279196	0.421875	0.0312318	0.000717026	0.8159	0.00390107	1.2032	0.0635173	0.92314	0.00669258	1.43576	0.310427	0.294102	2.62916	1.78615	2.95598	0.00114748	0.902503	0.00292793	0.0174611	1.41513	0.0848827	A2m	Genotype effect with no sex effect(real)
278	ONLI_0336	CSHPOS	SMd32:2	0.620141	1	0.987411	0.990765	23	6	0.0621346	0.00257373	0.0405943	0.214622	0.00531546	0.486517	0.0745137	-0.792795	0.00444955	-1.42225	0.968885	-0.0220262	0.113535	0.989703	0.892718	0.771689	1.02079	0.047145	0.65006	0.08178	0.0639897	2.05028	0.168389	A2m	Interaction_One sex_Female only2
279	ONLI_0337	CSHPOS	DAG 36:5; DAG 18:2-18:3;	0.0805923	1	0.971124	0.885337	40	6	0.0144736	0.000218381	0.580625	0.115643	0.000570097	0.849408	0.0387788	0.880273	0.0377543	1.07241	0.218463	0.688136	0.255245	0.750396	1.47684	1.67967	1.35197	0.000616556	0.986115	0.00166449	0.397603	0.601841	0.589762	A2m	Genotype effect with no sex effect(real)
282	ONLI_0340	CSHPOS	TAG 54:6; TAG 18:1-18:2-18:3;	0.000909919	1	0.860371	0.839701	38	6	0.00473289	0.00451076	0.514364	0.0697819	0.00892002	0.84042	0.0131666	1.0469	0.00598527	1.3025	0.189289	0.833464	0.128076	0.736189	1.84725	2.61611	1.53247	0.0083076	0.80108	0.0171072	0.512932	0.332048	0.677928	A2m	Genotype effect with no sex effect(real)
286	ONLI_0344	CSHPOS	PCo-34:3	0.0461152	1	0.96406	0.89528	40	6	0.00444798	7.34142e-09	0.244553	0.0697819	4.72119e-08	0.685814	0.0492406	0.839583	0.0054959	1.16566	0.260328	0.513503	0.128076	0.750396	1.30706	1.56458	1.14697	1.38809e-07	1.41827	8.44602e-07	0.0116056	0.766114	0.0758677	A2m	Genotype effect with no sex effect(real)
288	ONLI_0346	CSHPOS	PC 32:1; PC 16:0-16:1;	4.28373e-05	1	0.564283	0.990742	38	6	0.0141828	2.6442e-10	0.164843	0.114963	2.20165e-09	0.66017	0.115011	0.680134	0.461778	0.296589	0.0073827	0.990286	0.707613	0.307354	1.52746	1.13564	1.61885	1.7053e-08	1.39448	1.31651e-07	0.00913863	2.08817	0.0687972	A2m	Genotype effect with no sex effect(real)
292	ONLI_0350	CSHPOS	TAG 53:4; TAG 17:1-18:1-18:2;	0.0120528	1	0.582738	0.943481	39	6	0.0462341	3.7642e-06	0.438255	0.191488	1.33519e-05	0.820456	0.139342	0.638106	0.0367791	0.901984	0.450454	0.406588	0.253553	0.788294	1.31966	1.54602	1.22861	1.74469e-05	1.26208	6.41885e-05	0.00542053	0.766684	0.0643797	A2m	Genotype effect with no sex effect(real)
298	ONLI_0356	CSHPOS	TAG 52:1; TAG 16:0-18:0-18:1;	3.18074e-05	1	0.391283	0.857373	38	6	0.00468616	0.00103713	0.854151	0.0697819	0.00230442	0.953219	0.0161674	1.01777	0.0285275	1.10495	0.0986243	0.975859	0.225652	0.634574	1.73112	1.83674	1.72736	0.00458835	0.860035	0.0100259	0.0623017	0.730948	0.167822	A2m	Genotype effect with no sex effect(real)
302	ONLI_0361	CSHPOS	TAG 58:3; TAG 18:1-18:2-22:0;	4.55981e-05	1	0.679283	0.999996	39	6	0.0366548	7.73767e-07	0.686238	0.177036	3.09116e-06	0.900319	0.13519	0.644706	0.0717367	0.785823	0.289344	0.536709	0.326113	0.750396	1.3954	1.79553	1.2887	6.90526e-06	1.29167	2.78676e-05	0.00549735	1.04255	0.0643797	A2m	Genotype effect with no sex effect(real)
303	ONLI_0362	CSHPOS	CE (18:1)	1.31849e-05	1	0.716601	0.90927	36	6	0.00762304	0.0543225	0.0648041	0.0815234	0.0861104	0.54532	0.0129608	-1.05126	0.00306806	-1.73427	0.522205	-0.368254	0.113535	0.812146	0.567146	0.440261	0.740693	0.0221804	-0.714805	0.042481	0.211233	0.651211	0.393142	A2m	Genotype effect with no sex effect(real)
304	ONLI_0363	CSHPOS	LPC 15:0	0.53315	1	0.86655	0.876439	40	6	0.00621275	0.00162725	0.0306691	0.0726104	0.00345081	0.428983	0.0361651	0.89183	0.00334391	1.67016	0.833655	0.113504	0.113535	0.930072	1.16055	1.33055	1.01756	0.000978588	0.946811	0.00255466	0.4292	-0.609841	0.61618	A2m	One sex_Female only
305	ONLI_0364	CSHPOS	TAG 44:2; TAG 14:0-14:1-16:1;	0.00454258	1	0.546208	0.886234	22	4	0.000282266	0.00256186	0.945628	0.0223272	0.00530479	0.976491	0.00410251	1.43267	0.0226439	1.53827	0.0195843	1.48846	0.205602	0.50295	1.39896	1.42504	1.42375	0.00989437	0.887588	0.0200165	0.416032	0.837781	0.605565	A2m	Genotype effect with no sex effect(real)
308	ONLI_0367	CSHPOS	PC33:2	0.0215933	1	0.854318	0.799619	38	6	0.0319844	1.39291e-10	0.057439	0.161144	1.28115e-09	0.522233	0.215966	0.53701	0.00383334	1.06663	0.823992	0.0925072	0.113535	0.92059	1.19157	1.56016	1.02437	1.38762e-09	1.61719	1.89242e-08	0.124446	0.643064	0.263729	A2m	Genotype effect with no sex effect(real)
310	ONLI_0369	CSHPOS	TAG 51:2; TAG 16:0-17:0-18:2;	2.46335e-05	1	0.497284	0.673671	38	6	0.00719851	2.98387e-07	0.440797	0.0790837	1.27845e-06	0.820456	0.057528	0.814144	0.0152346	1.08081	0.211395	0.616334	0.171926	0.747833	1.57543	2.16083	1.44626	5.02656e-06	1.3082	2.08168e-05	0.0106793	0.843727	0.0744789	A2m	Genotype effect with no sex effect(real)
312	ONLI_0372	CSHPOS	PC 36:2e; PC 18:1e/18:1;	0.446005	1	0.903368	0.986536	39	6	0.0488158	1.83438e-09	0.947264	0.196084	1.27516e-08	0.976904	0.190318	0.56688	0.174956	0.566411	0.203728	0.530377	0.45437	0.739215	1.11918	1.15441	1.08577	2.16654e-08	1.44188	1.61673e-07	0.0921687	1.40585	0.21506	A2m	Genotype effect with no sex effect(real)
313	ONLI_0373	CSHPOS	PC 36:2	0.21142	1	0.515388	0.902825	40	6	0.0180392	2.93917e-06	0.930084	0.127402	1.06159e-05	0.970689	0.0730778	0.768078	0.082863	0.740444	0.140085	0.795713	0.340885	0.694624	1.14076	1.16476	1.12236	2.75963e-05	1.1853	9.83275e-05	0.00490682	1.24057	0.0643797	A2m	Genotype effect with no sex effect(real)
314	ONLI_0374	CSHPOS	LPC 18:2	0.747991	1	0.954481	0.998625	40	6	0.00194746	0.58382	0.56412	0.0513479	0.664463	0.849408	0.00258537	1.24935	0.00935353	1.46879	0.104487	1.02992	0.158251	0.634574	1.27228	1.3236	1.22054	0.780069	-0.0836324	0.845253	0.271869	-0.522506	0.468515	A2m	Genotype effect with no sex effect(real)
316	ONLI_0376	CSHPOS	CE ( 22:1)	1.05814e-05	1	0.940766	0.498173	36	6	0.0526533	0.0713712	0.0216132	0.198327	0.110479	0.404607	0.44757	-0.332751	0.0643617	-1.26772	0.250046	0.618133	0.310427	0.750396	0.833986	0.597771	1.12689	0.394286	-0.286536	0.50061	0.00515796	1.59931	0.0643797	A2m	Interaction_cannot classify2
324	ONLI_0385	CSHPOS	LPC 20:0	5.50761e-06	1	0.196924	0.191618	39	6	0.00254119	2.18025e-13	0.804611	0.0606522	5.74858e-11	0.940099	0.104139	0.699637	0.0270546	0.775966	0.0676454	0.66394	0.222919	0.634574	1.20086	1.25436	1.21337	1.54412e-10	1.58464	7.63377e-09	0.000791885	1.47262	0.0382175	A2m	Genotype effect with no sex effect(real)
325	ONLI_0386	CSHPOS	TAG 52:4; TAG 16:0-18:2-18:2;	0.302284	1	0.934236	0.932573	40	6	0.0401344	0.000899579	0.764546	0.184572	0.0020215	0.929686	0.0781114	0.755435	0.0910402	0.863115	0.270948	0.647755	0.345236	0.750396	1.27648	1.40029	1.19325	0.00251844	0.923223	0.00596434	0.00129839	0.707864	0.0449576	A2m	Genotype effect with no sex effect(real)
326	ONLI_0387	CSHPOS	TAG 53:2; TAG 17:0-18:1-18:1;	2.80829e-05	1	0.317206	0.71071	38	6	0.0325206	1.36525e-06	0.616685	0.161785	5.21697e-06	0.859722	0.134278	0.64714	0.0634075	0.836102	0.291757	0.526312	0.310427	0.751726	1.38714	1.63353	1.33696	9.82265e-06	1.29452	3.80868e-05	0.00223	0.984733	0.0581214	A2m	Genotype effect with no sex effect(real)
328	ONLI_0389	CSHPOS	TAG 52:2; TAG 16:0-18:0-18:2;	4.15902e-05	1	0.533465	0.869277	40	6	0.0231846	0.00079574	0.864104	0.137887	0.00182444	0.953219	0.0521789	0.829432	0.129246	0.768658	0.127812	0.890206	0.397918	0.67852	1.62003	1.42323	1.71588	0.00294379	0.887396	0.00684126	0.0352621	1.00894	0.127362	A2m	Genotype effect with no sex effect(real)
332	ONLI_0393	CSHPOS	TAG 48:1; TAG 14:0-16:0-18:1;	2.92656e-06	1	0.618814	0.996901	40	6	0.000648555	5.42344e-06	0.520721	0.0312318	1.85712e-05	0.840592	0.00677793	1.13364	0.0523797	0.933949	0.00910336	1.33332	0.289736	0.327307	2.20062	1.96415	2.29009	0.000140924	1.02052	0.000435433	0.02556	1.41989	0.105036	A2m	Genotype effect with no sex effect(real)
336	ONLI_0397	CSHPOS	Lyso-PAF C-16	0.00143818	1	0.196924	0.191618	39	6	0.000604175	8.97021e-14	0.00611516	0.0312318	5.74858e-11	0.329385	0.144064	0.630772	0.912851	0.0408474	6.77783e-05	1.25678	0.969215	0.0268063	1.22128	0.99653	1.37494	4.82914e-10	1.40707	1.15753e-08	0.000403746	2.623	0.0352288	A2m	One sex_Male only
341	ONLI_0402	CSHPOS	LPC 14:0	0.278557	1	0.999892	0.992746	40	6	0.0207167	0.630414	0.0779704	0.136802	0.699379	0.550666	0.024476	0.953975	0.292258	0.518224	0.0509216	1.38972	0.580844	0.60426	1.15267	1.10337	1.20161	0.939289	0.0237157	0.952536	0.0849666	0.895216	0.203662	A2m	Genotype effect with no sex effect(real)
343	ONLI_0404	CSHPOS	LPC p-18:0	0.393533	1	0.859243	0.869479	38	6	0.0251983	0.000835113	0.0817967	0.140365	0.00190367	0.566331	0.0652649	0.791191	0.671805	0.205503	0.0146029	1.417	0.836289	0.463047	1.11178	1.017	1.20301	0.00799195	0.762247	0.0165488	0.0177581	1.97374	0.0856504	A2m	Genotype effect with no sex effect(real)
344	ONLI_0405	CSHPOS	TAG 49:2; TAG 15:0-16:0-18:2;	0.000202783	1	0.399993	0.797097	39	6	0.00537858	2.8312e-06	0.58087	0.0726104	1.02889e-05	0.849408	0.0338194	0.903815	0.0157042	1.09315	0.159669	0.744944	0.172528	0.70922	1.63431	1.92448	1.53687	3.55343e-05	1.18826	0.00012437	0.00544614	0.840054	0.0643797	A2m	Genotype effect with no sex effect(real)
347	ONLI_0408	CSHPOS	LPC 18:3	0.20984	1	0.959258	0.976967	39	6	0.00809165	0.00104753	0.571929	0.084217	0.00230807	0.849408	0.0226825	0.966619	0.0198	1.17826	0.18951	0.777898	0.191739	0.736189	1.24543	1.29165	1.21275	0.0030219	0.893788	0.00692888	0.21176	0.493429	0.393198	A2m	Genotype effect with no sex effect(real)
353	ONLI_0414	CSHPOS	PCp-42:3 or PC o-42:4	0.00088883	1	0.440863	0.766051	40	6	0.0245481	0.357752	0.201642	0.140365	0.440782	0.667394	0.0287662	0.928764	0.0139892	1.43262	0.500716	0.424909	0.171926	0.801754	1.33771	1.5699	1.13389	0.21432	0.379178	0.308792	0.381474	-0.628531	0.576257	A2m	Genotype effect with no sex effect(real)
354	ONLI_0415	CSHPOS	TAG 51:5; TAG 15:0-18:2-18:3;	0.0474871	1	0.982734	0.999853	39	6	0.00583642	0.000873929	0.119936	0.0726104	0.00197508	0.579497	0.0179711	1.00137	0.00185858	1.55387	0.413392	0.474312	0.104057	0.782311	1.42615	2.09257	1.08533	0.000896712	0.991841	0.00237224	0.694423	-0.0877156	0.821189	A2m	Genotype effect with no sex effect(real)
355	ONLI_0416	CSHPOS	PC34:1	0.00022799	1	0.225801	0.926978	37	6	0.0290057	2.93267e-10	0.56388	0.153074	2.39148e-09	0.849408	0.242316	0.508813	0.0498671	0.718324	0.301392	0.425697	0.284716	0.754252	1.18128	1.22503	1.21436	1.01773e-08	1.55886	8.94475e-08	0.000784809	1.26623	0.0382175	A2m	Genotype effect with no sex effect(real)
357	ONLI_0418	CSHPOS	TAG 54:8; TAG 18:2-18:3-18:3;	0.00445881	1	0.984388	0.979733	40	6	0.017905	0.024616	0.239281	0.127402	0.0423288	0.684402	0.0287999	0.928579	0.0048066	1.37279	0.46584	0.48437	0.118813	0.788616	1.65861	2.48565	1.21733	0.0196799	0.707761	0.0379677	0.743358	-0.180657	0.860902	A2m	Genotype effect with no sex effect(real)
359	ONLI_0420	CSHPOS	Lyso-PC o-18	0.673474	1	0.99878	0.989602	40	6	0.00455875	0.000768694	0.0293665	0.0697819	0.00176755	0.428983	0.0303515	0.920238	0.797048	0.150747	0.000748967	1.68973	0.891746	0.0658259	1.15349	1.02361	1.27345	0.031908	0.596527	0.0581549	0.00846858	2.13551	0.0687972	A2m	One sex_Male only
360	ONLI_0421	CSHPOS	CE ( 24:1)	1.4503e-05	1	0.999836	0.995201	20	6	0.0058882	0.0441512	0.119376	0.0726104	0.0717116	0.579497	0.00881446	-1.13526	0.00436924	-1.65562	0.328675	-0.57729	0.113535	0.754252	0.185135	0.0459677	0.261978	0.327644	0.375976	0.435574	0.0333446	1.45431	0.12325	A2m	Genotype effect with no sex effect(real)
365	ONLI_0426	CSHPOS	DAG 38:6; DAG 18:2-20:4;	0.0272979	1	0.910295	0.993412	38	6	0.0290279	2.72834e-06	0.00801079	0.153074	9.99127e-06	0.329385	0.917312	0.045473	0.0282395	0.959698	0.143836	-0.796214	0.225652	0.694624	1.00634	1.31533	0.817932	1.17699e-06	1.37823	5.81874e-06	0.666745	-0.377677	0.808245	A2m	One sex_Female only
366	ONLI_0427	CSHPOS	LPC 20:3 b	0.0470251	1	0.514905	0.584656	39	6	0.0235892	0.000632045	0.191849	0.139246	0.00148794	0.667394	0.0513589	0.833227	0.426003	0.367133	0.036174	1.2788	0.668652	0.584014	1.31401	1.12283	1.44991	0.00581918	0.800305	0.0123736	0.0151212	1.71197	0.0839332	A2m	Genotype effect with no sex effect(real)
371	ONLI_0433	CSHPOS	LPC 18:1	0.0264293	1	0.476469	0.605752	39	6	0.025067	0.000546387	0.256641	0.140365	0.00130967	0.695329	0.0544569	0.822882	0.341369	0.415923	0.0546096	1.20867	0.619838	0.608206	1.23769	1.10263	1.33839	0.00442228	0.825579	0.00968982	0.0295149	1.61833	0.116151	A2m	Genotype effect with no sex effect(real)
372	ONLI_0434	CSHPOS	TAG 47:1; TAG 15:0-16:0-16:1;	0.000567237	1	0.607427	0.919988	36	6	0.0246134	0.000556198	0.569315	0.140365	0.00132916	0.849408	0.0700229	0.780401	0.1776	0.607908	0.0987113	1.00383	0.45437	0.634574	1.4204	1.35008	1.49494	0.00302208	0.916784	0.00692888	0.0272229	1.3127	0.109306	A2m	Genotype effect with no sex effect(real)
374	ONLI_0436	CSHPOS	DAG 34:1; DAG 16:0-18:1;	0.00210676	1	0.937686	0.999995	39	6	0.000785884	4.83164e-08	0.516364	0.0312318	2.43429e-07	0.84042	0.017407	1.00604	0.00414687	1.20775	0.0839261	0.837949	0.113535	0.634574	1.4039	1.47467	1.37566	1.34643e-06	1.31132	6.5143e-06	0.00612975	0.941524	0.0643797	A2m	Genotype effect with no sex effect(real)
379	ONLI_0441	CSHPOS	AC 8:1	1.45017e-05	1	0.99775	0.936453	40	6	0.00862442	0.372521	0.472764	0.0863534	0.454028	0.832198	0.0106344	-1.07438	0.00949174	-1.35391	0.241733	-0.794855	0.158251	0.750396	0.717777	0.547096	0.897404	0.273904	-0.308443	0.374194	0.825958	0.250617	0.907407	A2m	Genotype effect with no sex effect(real)
382	ONLI_0445	CSHPOS	PC 39:5; PC 19:0-20:5;	0.000720942	1	0.196924	0.191618	39	6	0.048848	2.74943e-12	0.0260834	0.196084	1.14779e-10	0.420104	0.582856	0.239711	0.0225032	0.797761	0.465158	-0.274492	0.205602	0.788616	1.0141	1.47751	0.891379	5.94571e-11	1.71002	6.3224e-09	0.00369321	0.637765	0.0584266	A2m	One sex_Female only
384	ONLI_0447	CSHPOS	LPE 16:0	0.28213	1	0.497548	0.54827	39	6	0.0400213	0.0160811	0.820304	0.184572	0.0287787	0.948627	0.059173	0.808008	0.171596	0.713384	0.167904	0.886069	0.452442	0.710224	1.12592	1.11479	1.13349	0.0399792	0.645989	0.0706514	0.0598644	0.818674	0.167237	A2m	Genotype effect with no sex effect(real)
387	ONLI_0450	CSHPOS	LPC 20:2	0.919944	1	0.977452	0.996728	39	6	0.0427667	2.70789e-05	0.930192	0.189794	8.20666e-05	0.970689	0.100847	0.706164	0.198839	0.662929	0.155777	0.721417	0.477916	0.70724	1.16691	1.1797	1.15001	0.000160715	1.09129	0.000488945	0.0999471	1.14977	0.228698	A2m	Genotype effect with no sex effect(real)
391	ONLI_0454	CSHPOS	TAG 50:1; TAG 16:0-16:0-18:1;	2.12756e-05	1	0.519457	0.865714	39	6	0.0013697	0.00100792	0.558859	0.0471057	0.00225217	0.849408	0.00706674	1.12916	0.0627914	0.94386	0.016391	1.33626	0.310427	0.463047	1.88646	1.85709	1.92595	0.00251455	0.850304	0.00596434	0.0655515	1.24271	0.170004	A2m	Genotype effect with no sex effect(real)
392	ONLI_0455	CSHPOS	TAG 52:6; TAG 16:1-18:2-18:3;	0.00772106	1	0.793743	0.999967	39	6	0.0317314	1.64524e-07	0.368965	0.160915	7.35244e-07	0.794892	0.128409	0.655819	0.0310846	0.945853	0.416087	0.400322	0.236422	0.782311	1.28139	1.57883	1.16732	1.73175e-06	1.34695	8.15367e-06	0.129725	0.801421	0.270034	A2m	Genotype effect with no sex effect(real)
395	ONLI_0458	CSHPOS	TAG 60:11; TAG 18:2-20:4-22:5;	0.360048	1	0.971502	0.922915	39	6	0.498343	0.00146541	0.0426223	0.687388	0.00315843	0.488613	0.574069	-0.245299	0.343514	0.494911	0.086251	-1.00273	0.619838	0.634574	0.960186	1.16642	0.708445	0.018296	-0.671705	0.0353842	0.0526268	-2.16935	0.155287	A2m	Interaction_cannot classify2
396	ONLI_0471	CSHNEG	FA 11:0	0.920528	1	0.909774	0.725716	39	6	4.33945e-05	0.934355	0.117582	0.00493143	0.953645	0.579497	7.05909e-05	-1.58784	0.00172848	-2.1343	0.0205636	-1.04461	0.104057	0.50295	0.579273	0.449336	0.715275	0.65052	-0.125607	0.740376	0.0147187	0.964075	0.0839332	A2m	Genotype effect with no sex effect(real)
397	ONLI_0473	CSHNEG	FA 13:0	0.00250104	1	0.881745	0.919578	37	6	9.99904e-06	0.996845	0.911225	0.00158185	0.996845	0.969859	1.80268e-05	1.68684	0.0122396	1.64884	0.00033003	1.72454	0.167776	0.0522107	1.58532	1.55226	1.61821	0.966858	-0.0114993	0.976736	0.890434	0.0641966	0.943013	A2m	Genotype effect with no sex effect(real)
398	ONLI_0474	CSHNEG	FA 14:1	0.0655255	1	0.996877	0.960395	40	6	0.0205718	0.517445	0.412034	0.136802	0.603686	0.811732	0.0243131	-0.955003	0.0680299	-1.2808	0.215557	-0.629203	0.316751	0.747833	0.533085	0.411201	0.651938	0.775698	0.0891975	0.842826	0.123108	0.740797	0.263124	A2m	Genotype effect with no sex effect(real)
400	ONLI_0476	CSHNEG	FA 15:0	0.806263	1	0.998305	0.913513	38	6	0.0218408	0.778525	0.414589	0.136802	0.825487	0.811732	0.0259311	0.947096	0.0697016	1.27251	0.231576	0.621681	0.320546	0.750396	1.2851	1.36851	1.2012	0.969779	0.0114298	0.978438	0.533716	-0.639401	0.696649	A2m	Genotype effect with no sex effect(real)
408	ONLI_0485	CSHNEG	FA 20:3 a	0.797569	1	0.553147	0.965094	37	5	0.00552298	0.0923326	0.0126343	0.0726104	0.139381	0.339778	0.00711633	1.22226	0.0587793	1.01562	0.05346	1.31727	0.30791	0.608206	1.37805	1.3572	1.37559	0.167208	0.431373	0.250495	0.0750709	0.733018	0.186733	A2m	cannot classify
423	ONLI_0505	CSHNEG	LPE 22:5	0.488394	1	1	0.995925	35	5	0.000612719	1.03811e-07	0.570985	0.0312318	4.85297e-07	0.849408	0.00671919	1.23155	0.0160052	1.28699	0.0296371	0.948574	0.173426	0.520955	1.68615	2.14244	1.37339	1.43911e-06	1.29163	6.89899e-06	0.168106	0.953215	0.329139	A2m	Genotype effect with no sex effect(real)
424	ONLI_0509	CSHNEG	LPC 16:0	0.0790977	1	0.988573	0.997194	39	6	0.0212207	1.81062e-05	0.284262	0.136802	5.59452e-05	0.705928	0.0699202	0.777359	0.0147903	1.14708	0.423579	0.437757	0.171926	0.78283	1.11938	1.17409	1.07861	7.06019e-05	1.17459	0.000231727	0.18144	0.465268	0.353495	A2m	Genotype effect with no sex effect(real)
426	ONLI_0512	CSHNEG	LPC 17:0	0.895224	1	0.999811	0.996111	39	6	0.0473009	0.023766	0.0179045	0.192722	0.0411354	0.38277	0.494917	0.297599	0.0479229	1.23961	0.252713	-0.660893	0.283194	0.750396	1.02485	1.10325	0.948906	0.0405187	0.64287	0.0713815	0.113806	-1.25763	0.248677	A2m	One sex_Female only
427	ONLI_0513	CSHNEG	LPC 18:3	0.133645	1	0.715029	0.935943	38	6	0.0105565	4.84401e-05	0.201999	0.0948882	0.000141912	0.667394	0.0431754	0.864279	0.00560625	1.31897	0.394905	0.47004	0.128076	0.782311	1.21988	1.37126	1.11953	9.32057e-05	1.1485	0.000296087	0.580507	0.299579	0.735867	A2m	Genotype effect with no sex effect(real)
429	ONLI_0518	CSHNEG	LPI 18:2	0.0757436	1	0.993506	0.982746	39	6	0.00361172	0.138911	0.0445668	0.0680207	0.197623	0.489616	0.00467541	1.18067	0.00119348	1.91986	0.442753	0.436702	0.0951023	0.786962	1.49753	1.82451	1.14524	0.522882	-0.186685	0.627618	0.00154884	-1.66984	0.0510472	A2m	One sex_Female only
430	ONLI_0521	CSHNEG	LPI 18:0	5.52065e-05	1	0.581761	0.907522	40	6	0.0549676	0.207067	0.0476819	0.20223	0.278081	0.508365	0.0619873	0.798577	0.701672	0.17299	0.0493477	1.42416	0.845517	0.60426	1.27635	1.04127	1.47953	0.515044	0.194426	0.621984	0.116302	1.4456	0.25343	A2m	Interaction_One sex_Male only2
432	ONLI_0524	CSHNEG	LPC 20:3 a	0.0193634	1	0.134215	0.39625	37	6	0.0223103	0.000597812	0.463147	0.136802	0.00141155	0.831066	0.05901	0.810679	0.172312	0.566953	0.0899657	1.07824	0.452592	0.634574	1.27255	1.17386	1.35342	0.00392034	0.881816	0.00875498	0.00615313	1.3931	0.0643797	A2m	Genotype effect with no sex effect(real)
435	ONLI_0531	CSHNEG	LPC 22:5 a	0.00168635	1	0.0916173	0.296262	35	5	0.0124831	1.6407e-05	0.652426	0.108507	5.12961e-05	0.877669	0.0412028	0.946984	0.132404	0.696643	0.071226	1.00692	0.398576	0.634574	1.33159	1.27219	1.30463	0.000114477	1.12305	0.000359332	0.0795582	1.43333	0.197274	A2m	Genotype effect with no sex effect(real)
446	ONLI_0547	CSHNEG	PE 34:1; PE 16:0-18:1;	0.000178829	1	0.542253	0.953145	40	6	0.0028217	4.51564e-12	0.772582	0.0606522	1.17455e-10	0.929686	0.0750602	0.763019	0.0265364	0.833274	0.0749358	0.692764	0.22095	0.634574	1.41281	1.4865	1.38693	8.19104e-10	1.52219	1.32227e-08	0.0186337	1.38168	0.0872143	A2m	Genotype effect with no sex effect(real)
448	ONLI_0549	CSHNEG	Cer-NS d43:1; Cer-NS d19:1/24:0;	0.000686538	1	0.982239	0.982981	40	6	0.0560282	6.96038e-05	0.0291373	0.203295	0.000198045	0.428983	0.403873	0.362886	0.0346628	1.12866	0.440562	-0.402891	0.250531	0.786962	1.19619	1.55728	0.658078	0.0038399	-0.797117	0.00867818	0.0241867	-2.32867	0.102308	A2m	Interaction_One sex_Female only2
450	ONLI_0551	CSHNEG	Cer-NP t42:0; Cer-NP t18:0/24:0;	0.71315	1	0.998319	0.978902	40	6	0.00973194	0.00576904	0.565342	0.0910907	0.0111846	0.849408	0.0199808	0.984722	0.027779	1.19543	0.192656	0.774013	0.225652	0.736189	1.35593	1.50072	1.2455	0.0100961	0.766958	0.0203725	0.544199	0.345539	0.7054	A2m	Genotype effect with no sex effect(real)
452	ONLI_0554	CSHNEG	HexCer-AP t34:0; HexCer-AP t18:0/16:0;	0.69578	1	0.265461	0.186211	39	6	0.0966073	0.00511024	0.0344579	0.268128	0.0100303	0.461969	0.668035	0.187303	0.076455	0.993391	0.285112	-0.642013	0.333067	0.750396	1.0455	1.27234	0.857506	0.00167153	0.905902	0.00413181	0.550668	-0.729503	0.710569	A2m	Interaction_cannot classify2
459	ONLI_0563	CSHNEG	SM d33:1; SM d17:1/16:0;	0.717526	1	0.935571	0.999991	40	6	0.0301064	1.3102e-07	0.769126	0.156672	5.99057e-07	0.929686	0.123579	0.663077	0.194355	0.575659	0.111335	0.750496	0.475791	0.639896	1.11305	1.07082	1.16762	6.40825e-07	-1.32963	3.3569e-06	0.140157	-1.15479	0.285732	A2m	Genotype effect with no sex effect(real)
465	ONLI_0569	CSHNEG	SM d34:2; SM d18:2/16:0;	0.0406639	1	0.594252	0.49574	38	6	0.0419996	4.7128e-11	0.239166	0.189794	5.25046e-10	0.684402	0.199007	0.557038	0.560704	0.229036	0.0248476	0.808802	0.783544	0.507641	1.1101	1.01584	1.1555	3.56979e-09	1.44851	3.7154e-08	0.0184046	2.02828	0.0866552	A2m	Genotype effect with no sex effect(real)
469	ONLI_0573	CSHNEG	PE18:1e/18-HETE	0.224892	1	0.998916	0.60673	34	6	0.0112785	1.81306e-08	0.0124205	0.100239	9.89053e-08	0.339778	0.227715	0.527613	0.00589355	1.17997	0.612526	-0.217629	0.128076	0.847379	1.16408	1.45748	0.958252	5.47368e-08	1.57903	3.83158e-07	0.693978	0.181429	0.821189	A2m	One sex_Female only
478	ONLI_0582	CSHNEG	HexCer-NS d36:1; HexCer-NS d18:1/18:0;	4.0334e-05	1	0.212012	0.229992	37	6	0.0183309	2.72115e-12	0.00509923	0.128316	1.14779e-10	0.329385	0.935925	0.0352795	0.130834	-0.566362	0.0236236	0.779325	0.398576	0.507641	0.702243	0.62478	2.55399	6.38265e-11	-1.75632	6.3224e-09	0.0132166	-0.410629	0.0791995	A2m	One sex_Male only
479	ONLI_0583	CSHNEG	SM d36:2	0.0133348	1	0.227344	0.743154	37	6	0.0749778	2.32933e-09	0.0229352	0.234417	1.60218e-08	0.404607	0.849054	-0.0835071	0.0989144	-0.646895	0.16718	0.611133	0.356586	0.710224	1.03961	0.815454	1.6954	4.42229e-10	-1.61878	1.10871e-08	0.695571	-0.360749	0.821189	A2m	Interaction_cannot classify2
480	ONLI_0584	CSHNEG	PE 40:7; PE 18:1-22:6;	0.0104047	1	0.295796	0.537931	40	6	0.0164289	8.98661e-12	0.926121	0.123039	1.59814e-10	0.970281	0.167898	-0.595375	0.123039	-0.573082	0.0964647	-0.617668	0.392435	0.634574	0.752127	0.722947	0.764196	5.22317e-10	1.55274	1.18044e-08	0.00509223	1.50815	0.0643797	A2m	Genotype effect with no sex effect(real)
485	ONLI_0590	CSHNEG	PC 33:2; PC 15:0-18:2;	0.228318	1	0.980855	0.335671	40	6	0.00283708	2.88824e-11	0.00268287	0.0606522	3.62634e-10	0.329385	0.292652	0.456407	0.00119535	1.23663	0.425603	-0.323815	0.0951023	0.784737	1.16713	1.58146	0.937877	1.03908e-10	1.65725	6.3224e-09	0.839984	0.0968053	0.911865	A2m	One sex_Female only
487	ONLI_0593	CSHNEG	PC 34:2e; PC 16:0e/18:2;	0.000731073	1	0.298514	0.370828	40	5	0.0475104	1.76491e-12	0.202692	0.192722	1.14779e-10	0.667394	0.425808	0.37524	0.0243785	0.810176	0.764373	0.135078	0.211905	0.890074	1.09676	1.33872	1.05345	9.61424e-11	1.64897	6.3224e-09	0.00340801	0.973869	0.0581214	A2m	Genotype effect with no sex effect(real)
490	ONLI_0597	CSHNEG	PI 32:1; PI 16:0-16:1;	0.000291038	1	0.495391	0.978409	35	6	0.0061988	5.92068e-11	0.471635	0.0726104	6.16218e-10	0.832198	0.140083	0.641096	0.0143708	0.88512	0.192214	0.531626	0.171926	0.736189	1.53768	2.07356	1.52288	1.15856e-08	1.56981	9.74915e-08	0.000959559	1.21631	0.039948	A2m	Genotype effect with no sex effect(real)
491	ONLI_0598	CSHNEG	PI 32:0; PI 16:0-16:0;	0.650139	1	0.880317	0.993784	40	6	0.0210908	0.0155305	0.218822	0.136802	0.0279197	0.6764	0.0347091	0.89857	0.0127264	1.36008	0.472948	0.437063	0.167776	0.792766	1.33183	1.6117	1.11937	0.0122955	0.757287	0.0243754	0.772364	-0.165726	0.881587	A2m	Genotype effect with no sex effect(real)
503	ONLI_0613	CSHNEG	PC 35:1; PC 17:0-18:1;	0.126237	1	0.98401	0.361116	39	6	0.636982	1.49633e-10	0.039479	0.78238	1.345e-09	0.486517	0.737982	0.14617	0.0944164	0.665607	0.286737	-0.415389	0.35228	0.750396	1.0675	1.27908	0.925306	7.95979e-10	1.64276	1.31171e-08	0.210431	0.561764	0.393142	A2m	Interaction_cannot classify2
505	ONLI_0615	CSHNEG	PI 34:1; PI 16:0-18:1;	0.103795	1	0.960328	0.999725	39	6	0.0323887	9.05001e-09	0.0899667	0.161785	5.50658e-08	0.566331	0.155598	0.613582	0.00623675	1.1125	0.739351	0.152948	0.129823	0.885018	1.24141	1.59041	1.0776	7.74244e-08	1.49323	5.14644e-07	0.0128617	0.533678	0.0791995	A2m	Genotype effect with no sex effect(real)
509	ONLI_0620	CSHNEG	PC 36:3 a	0.41225	1	0.558758	0.998539	39	6	0.611488	1.06605e-08	0.0494868	0.770202	6.29287e-08	0.508365	0.701063	0.167702	0.0872001	0.714408	0.350881	-0.418583	0.341462	0.770964	1.04682	1.18322	0.938521	1.98191e-08	1.54361	1.49304e-07	0.480674	0.410623	0.652166	A2m	Interaction_cannot classify2
510	ONLI_0621	CSHNEG	PC 36:3 b	0.66906	1	0.802601	0.82803	38	6	0.0216837	9.61289e-08	0.00711872	0.136802	4.55317e-07	0.329385	0.635748	0.207191	0.0265294	1.03176	0.176755	-0.61738	0.22095	0.720533	1.0287	1.20735	0.894673	1.2612e-07	1.49793	7.8122e-07	0.798361	-0.151215	0.894135	A2m	One sex_Female only
511	ONLI_0622	CSHNEG	PC 36:3; PC 18:1-18:2;	0.41225	1	0.558758	0.998539	39	6	0.611488	1.06605e-08	0.0494868	0.770202	6.29287e-08	0.508365	0.701063	0.167702	0.0872001	0.714408	0.350881	-0.418583	0.341462	0.770964	1.04682	1.18322	0.938521	1.98191e-08	1.54361	1.49304e-07	0.480674	0.410623	0.652166	A2m	Interaction_cannot classify2
514	ONLI_0628	CSHNEG	PI 35:2; PI 17:0-18:2;	0.101487	1	0.946807	0.979558	40	6	0.0317354	5.87374e-09	0.0334099	0.160915	3.8083e-08	0.455642	0.29381	0.455327	0.00921377	1.06062	0.741188	-0.149971	0.158251	0.885018	1.20314	1.64412	0.977911	2.33785e-08	1.5333	1.72826e-07	0.250209	0.322705	0.447772	A2m	One sex_Female only
521	ONLI_0638	CSHNEG	PI 36:4; PI 16:0-20:4;	0.0256627	1	0.648051	0.346115	37	6	0.0284968	8.95955e-12	0.176193	0.153074	1.59814e-10	0.667394	0.22507	0.527595	0.0139988	0.875539	0.562654	0.223895	0.171926	0.829083	1.18607	1.40311	1.0914	6.23987e-10	1.63705	1.21722e-08	0.0171132	0.985403	0.0848827	A2m	Genotype effect with no sex effect(real)
523	ONLI_0641	CSHNEG	PI 36:3; PI 18:1-18:2;	0.0110976	1	0.298514	0.370828	39	6	0.764231	9.28632e-12	0.0403331	0.879678	1.59814e-10	0.486517	0.826255	0.0959488	0.117095	0.581736	0.243501	-0.433185	0.383308	0.750396	1.01028	1.20281	0.894339	1.03907e-10	1.69052	6.3224e-09	0.103958	0.675599	0.23409	A2m	Interaction_cannot classify2
525	ONLI_0644	CSHNEG	PI 36:2; PI 18:0-18:2;	0.150445	1	0.988027	0.999998	40	6	0.131301	6.83669e-07	0.0394473	0.314723	2.74509e-06	0.486517	0.25925	0.488839	0.0108471	1.13287	0.756821	-0.155193	0.166048	0.88817	1.21889	1.56435	1.00574	1.0181e-06	1.39902	5.09692e-06	0.695257	0.110956	0.821189	A2m	Interaction_One sex_Female only2
527	ONLI_0646	CSHNEG	PI 36:1; PI 18:0-18:1;	0.408813	1	0.965912	0.993329	40	6	0.00410501	1.36758e-05	0.432592	0.0697819	4.39738e-05	0.820456	0.0211201	0.976419	0.00979144	1.2307	0.178539	0.722138	0.158251	0.720533	1.37257	1.57339	1.23973	5.70138e-05	1.1255	0.000191906	0.293995	0.616938	0.490784	A2m	Genotype effect with no sex effect(real)
533	ONLI_0653	CSHNEG	PC 38:4	0.424149	1	0.960277	0.989144	40	6	0.044304	0.000406974	0.695871	0.189794	0.00101232	0.900319	0.089444	-0.729153	0.117755	-0.867654	0.265112	-0.590653	0.383308	0.750396	0.876125	0.855236	0.900879	0.000531044	-0.982024	0.00146873	0.461391	-0.705023	0.635819	A2m	Genotype effect with no sex effect(real)
534	ONLI_0654	CSHNEG	PC 38:4; PC 16:0-22:4;	0.424149	1	0.960277	0.989144	40	6	0.044304	0.000406974	0.695871	0.189794	0.00101232	0.900319	0.089444	-0.729153	0.117755	-0.867654	0.265112	-0.590653	0.383308	0.750396	0.876125	0.855236	0.900879	0.000531044	-0.982024	0.00146873	0.461391	-0.705023	0.635819	A2m	Genotype effect with no sex effect(real)
539	ONLI_0661	CSHNEG	SM d42:2; SM d18:1/24:1;	0.913703	1	0.854724	0.779933	38	6	0.0394252	0.000523911	0.0149566	0.18369	0.00126732	0.369709	0.486031	-0.304252	0.311887	0.608307	0.0170639	-1.18567	0.595509	0.465433	0.959155	1.05878	0.855953	0.0433332	-0.591626	0.0756656	0.0111348	-2.38561	0.0744789	A2m	One sex_Male only
541	ONLI_0664	CSHNEG	PI 37:2; PI 19:0-18:2;	0.000293377	1	0.345335	0.966102	40	6	0.0688839	4.99497e-08	0.0224933	0.224105	2.46939e-07	0.404607	0.78674	0.118039	0.0451055	0.809016	0.25066	-0.572938	0.278738	0.750396	0.977277	1.85657	0.748259	9.28969e-08	1.49554	6.07284e-07	0.805997	0.113586	0.896686	A2m	Interaction_One sex_Female only2
543	ONLI_0666	CSHNEG	PI 38:6; PI 16:0-22:6;	0.0270871	1	0.970265	0.557022	38	6	0.0388737	6.71271e-11	0.027997	0.18303	6.80738e-10	0.425877	0.488966	0.302219	0.0142225	0.90723	0.59168	-0.215127	0.171926	0.844799	1.08162	1.37001	0.94867	3.73469e-10	1.6656	1.09413e-08	0.259993	0.543242	0.457294	A2m	One sex_Female only
560	ONLI_0703	HILICPOS	R-Butyrylcarnitine	0.276491	1	0.959475	0.964976	37	5	0.00175632	0.500318	0.00908123	0.0513479	0.588916	0.329385	0.0024088	1.36165	0.196184	0.974724	0.00265823	1.68556	0.475791	0.210266	1.43487	1.28053	1.58066	0.247645	-0.348582	0.346703	0.601989	0.36225	0.757032	A2m	One sex_Male only
563	ONLI_0706	HILICPOS	2-Indolinone	1.46751e-05	1	0.988776	0.421588	40	6	0.00296262	1.70599e-08	0.27503	0.0616693	9.50307e-08	0.704522	0.0362912	0.891257	0.00977509	1.20105	0.172707	0.58146	0.158251	0.719008	1.95942	2.19707	1.3813	1.92384e-06	-1.22183	9.0045e-06	0.0123757	-1.84142	0.0791995	A2m	Genotype effect with no sex effect(real)
566	ONLI_0710	HILICPOS	5-Hydroxytryptophol	1.58459e-07	1	0.812029	0.903311	34	6	0.0498523	0.112215	0.0829842	0.196084	0.164484	0.566331	0.0575463	0.818948	0.132523	0.900404	0.235657	0.737493	0.398576	0.750396	1.66336	1.83372	1.38824	0.183309	-0.453088	0.27153	0.269428	-0.615998	0.465938	A2m	Genotype effect with no sex effect(real)
577	ONLI_0733	HILICPOS	Glycerophosphocholine	0.577308	1	0.280477	0.845508	40	6	0.0167992	0.000241605	0.508029	0.123039	0.00062659	0.84042	0.0463398	0.850099	0.199383	0.622585	0.0602232	1.07761	0.477916	0.634574	1.23552	1.17631	1.31133	0.000287328	-1.03654	0.000829476	0.429222	-0.581509	0.61618	A2m	Genotype effect with no sex effect(real)
579	ONLI_0735	HILICPOS	Hexanoyl-L-carnitine	0.00323997	1	0.99422	0.882931	40	6	0.019098	0.826817	0.128044	0.131361	0.863953	0.592299	0.0226526	-0.965824	0.10578	-1.11386	0.125936	-0.817785	0.370229	0.67509	0.642311	0.598788	0.689057	0.740443	-0.101155	0.814591	0.805586	0.194923	0.896686	A2m	Genotype effect with no sex effect(real)
580	ONLI_0739	HILICPOS	Isovaleryl-L-carnitine	0.149309	1	0.998702	0.985573	39	6	0.0230592	0.0102357	0.66776	0.137887	0.0190504	0.885694	0.0387477	0.88142	0.0756788	1.03276	0.210095	0.712962	0.333067	0.747833	1.18521	1.21286	1.1497	0.0273735	-0.667799	0.0508274	0.15696	-0.987594	0.312735	A2m	Genotype effect with no sex effect(real)
581	ONLI_0740	HILICPOS	Lauroyl-L-carnitine	0.0326272	1	0.917776	0.894908	38	6	0.0312949	0.568211	0.157692	0.160742	0.652329	0.656956	0.0364904	-0.892435	0.147778	-1.08709	0.105952	-0.68672	0.423523	0.634574	0.740418	0.700376	0.790684	0.500761	-0.210187	0.609388	0.82918	0.19018	0.908423	A2m	Genotype effect with no sex effect(real)
586	ONLI_0747	HILICPOS	Linoleoylcarnitine	0.0273839	1	0.566401	0.235441	38	6	0.0102109	0.200363	0.61737	0.0928372	0.270456	0.859722	0.0126013	-1.05301	0.0844518	-1.23587	0.0561303	-0.849265	0.340885	0.608206	0.66984	0.599531	0.763035	0.188671	-0.396932	0.278029	0.990621	-0.0103311	0.998193	A2m	Genotype effect with no sex effect(real)
589	ONLI_0751	HILICPOS	N-.alpha.-Acetyl-L-arginine	0.290492	1	0.948066	0.792044	40	6	0.0445764	0.127362	0.0774849	0.189794	0.18317	0.550666	0.0507684	0.834246	0.0907377	1.03272	0.288697	0.635771	0.345236	0.750396	1.19883	1.26574	1.13966	0.125663	0.482218	0.194901	0.860239	0.0852679	0.925781	A2m	Genotype effect with no sex effect(real)
598	ONLI_0765	HILICPOS	Pyridoxal	0.000291585	1	0.995853	0.431877	39	6	0.0243724	7.41812e-10	0.142828	0.140365	5.64205e-09	0.627649	0.156342	0.612505	0.0154321	1.02386	0.5632	0.235078	0.171926	0.829083	1.29286	1.45107	1.04514	2.05715e-07	-1.32329	1.18774e-06	0.00587107	-2.11207	0.0643797	A2m	Genotype effect with no sex effect(real)
613	ONLI_0789	HILICPOS	1-Methylguanosine	0.22911	1	0.968067	0.976678	39	6	0.33393	0.00905945	0.0088462	0.553741	0.0170214	0.329385	0.347707	-0.408459	0.5845	0.314045	0.0468974	-1.14466	0.789006	0.60426	0.925812	1.05835	0.77457	0.0759906	-0.534365	0.126608	0.0211325	-1.99307	0.0933844	A2m	Interaction_One sex_Male only2
618	ONLI_0798	HILICPOS	Ala-Ile	0.0458732	1	0.898937	0.998632	35	6	0.000595982	0.00173311	0.0105746	0.0312318	0.00366549	0.329385	0.00754015	-1.12483	0.000998623	-1.97301	0.683178	-0.197572	0.0951023	0.874693	0.466374	0.292212	0.761731	0.00230618	-0.922572	0.00554465	0.101551	0.852863	0.23049	A2m	One sex_Female only
621	ONLI_0802	HILICPOS	Cytosine	0.0107361	1	0.940083	0.83375	39	5	4.3641e-05	0.0163786	0.81305	0.00493143	0.0292449	0.94438	0.00027347	1.59467	0.0345028	1.55617	0.000531875	1.73305	0.250531	0.0566579	1.79553	1.70616	1.98683	0.0298832	-0.599381	0.0549712	0.458356	-0.42251	0.634956	A2m	Genotype effect with no sex effect(real)
635	ONLI_0820	HILICPOS	4-Aminobenzoic acid	0.645791	1	0.884638	0.855746	36	6	0.000726462	0.542669	0.0568567	0.0312318	0.629401	0.522233	0.00104592	1.34856	0.00296637	2.0394	0.156184	0.657721	0.113535	0.70724	1.40868	1.61362	1.20109	0.895334	0.0391295	0.929409	0.0112342	-1.34255	0.0744789	A2m	Genotype effect with no sex effect(real)
636	ONLI_0821	HILICPOS	4-Guanidinobutyric acid	2.09405e-05	1	0.773627	0.650275	37	6	0.000430932	0.926997	0.0441757	0.0309879	0.949811	0.489616	0.000632815	1.3976	0.000475666	2.13014	0.22192	0.67966	0.0951023	0.750396	1.81972	2.52569	1.1811	0.538804	0.180063	0.642826	0.00813625	-1.27042	0.0687972	A2m	One sex_Female only
637	ONLI_0822	HILICPOS	5'-Methylthioadenosine	0.00325835	1	0.982285	0.958314	37	6	1.72568e-06	0.36425	0.341265	0.000341254	0.4467	0.771526	3.42611e-06	1.79406	0.00142404	2.0885	0.000291442	1.47604	0.0951023	0.0522107	2.00254	2.1375	1.86546	0.275069	0.290799	0.375137	0.367719	-0.321658	0.561516	A2m	Genotype effect with no sex effect(real)
646	ONLI_0837	HILICPOS	Aspartic acid	0.552746	1	0.978325	0.954068	36	6	0.0137371	0.0288426	0.787554	0.114379	0.0490635	0.937685	0.0245368	0.95793	0.138924	0.85697	0.0733824	1.05889	0.408756	0.634574	1.23234	1.17783	1.28059	0.0475535	0.605372	0.0823081	0.365121	0.807291	0.561159	A2m	Genotype effect with no sex effect(real)
657	ONLI_0850	HILICPOS	gamma-Aminobutyric Acid GABA	0.0477869	1	0.86833	0.923952	39	6	0.0453135	9.18645e-05	0.118993	0.18989	0.000255862	0.579497	0.0927905	0.72286	0.0212025	1.24524	0.726039	0.178322	0.197308	0.885018	1.19215	1.35233	0.992549	0.00294927	-0.8643	0.00684126	8.61729e-05	-1.93121	0.0352288	A2m	Genotype effect with no sex effect(real)
658	ONLI_0851	HILICPOS	gamma-Glutamylleucine	0.337774	1	0.986716	0.989705	39	6	0.0063339	0.610177	0.351021	0.0726104	0.682673	0.779301	0.00796933	1.11363	0.0374548	1.47267	0.117269	0.748647	0.255245	0.642637	1.2562	1.31949	1.19373	0.457544	0.232015	0.568159	0.158545	-0.49201	0.314308	A2m	Genotype effect with no sex effect(real)
669	ONLI_0864	HILICPOS	Hypoxanthine	2.37281e-06	1	0.855966	0.921062	34	6	0.00379943	0.0682559	0.00566528	0.0684411	0.106072	0.329385	0.00506464	1.17569	0.0553684	1.09208	0.0361778	1.2593	0.297934	0.584014	2.25571	2.03818	2.41327	0.0933984	0.520386	0.15139	0.35648	0.687608	0.555071	A2m	One sex_Male only
671	ONLI_0867	HILICPOS	Leucine	0.353183	1	0.983332	0.968606	40	6	0.019019	0.156955	0.0422361	0.131361	0.219356	0.488613	0.0225634	0.966424	0.245899	0.712229	0.0382147	1.22062	0.540295	0.592703	1.22334	1.15644	1.29808	0.134586	-0.466615	0.207519	0.913969	0.0417747	0.956282	A2m	One sex_Male only
682	ONLI_0884	HILICPOS	Pipecolic acid	6.28441e-07	1	0.784089	0.522616	35	6	9.76739e-08	9.84393e-07	0.58939	7.72601e-05	3.87391e-06	0.855965	2.41486e-05	1.66443	0.000702586	1.75521	5.9625e-05	1.48248	0.0951023	0.0268063	2.0625	1.77356	2.24468	1.59824e-05	1.06357	5.99151e-05	0.0701795	0.790836	0.179071	A2m	Genotype effect with no sex effect(real)
684	ONLI_0886	HILICPOS	Proline-hydroxyproline	0.00434843	1	0.674439	0.995228	39	6	0.00543476	0.512121	0.0191157	0.0726104	0.599553	0.387705	0.00689112	-1.13238	0.256274	-0.638424	0.0105457	-1.62797	0.556902	0.362682	0.577299	0.709859	0.441479	0.832124	-0.0636926	0.888273	0.126078	-1.05324	0.265234	A2m	One sex_Male only
685	ONLI_0887	HILICPOS	Propionylcarnitine	0.00257567	1	0.619866	0.637506	39	6	0.0142264	0.00368723	0.0175536	0.114963	0.00745933	0.38277	0.116908	0.67572	0.0035797	1.56405	0.711964	-0.222972	0.113535	0.884087	1.24026	1.54591	0.908067	0.165441	-0.403947	0.248791	0.0147404	-2.19097	0.0839332	A2m	One sex_Female only
691	ONLI_0896	HILICPOS	TMAO	8.98613e-05	1	0.215792	0.221749	37	6	0.0679733	9.78777e-12	0.0247671	0.224029	1.64726e-10	0.416825	0.703978	-0.166598	0.288304	0.397752	0.0519465	-0.692815	0.579462	0.60426	1.14533	1.28395	0.62761	1.17125e-08	-1.41095	9.75217e-08	0.00130724	-2.50152	0.0449576	A2m	Interaction_cannot classify2
698	ONLI_0918	HILICNEG	2-Hydroxy-4-methylpentanoic acid	0.00119689	1	0.976259	0.33972	36	5	0.0159759	3.35267e-05	0.641332	0.123039	0.000100453	0.874644	0.0400668	0.951009	0.0167345	1.06626	0.211021	0.736169	0.17427	0.747833	1.8416	2.56434	1.5287	3.58715e-05	1.1465	0.000124997	0.494025	0.816413	0.660091	A2m	Genotype effect with no sex effect(real)
707	ONLI_0934	HILICNEG	4-Methylcatechol	4.12763e-07	1	0.752242	0.921867	36	5	0.00191741	0.0135044	0.00320287	0.0513479	0.0246698	0.329385	0.0273703	1.0177	0.523108	-0.352142	0.00488955	1.92621	0.757373	0.257842	2.2945	0.944151	3.10499	0.922574	0.0283518	0.940407	0.043902	2.3067	0.142907	A2m	One sex_Male only
708	ONLI_0935	HILICNEG	4-Pyridoxic acid	0.0442146	1	0.992202	0.998545	35	5	0.00978851	0.00123178	0.855228	0.0910907	0.00269155	0.953219	0.0185439	1.08244	0.105511	0.949403	0.0624613	1.08787	0.370229	0.634574	1.48647	1.44634	1.43364	0.00248054	-0.905883	0.00590997	0.40214	-0.767414	0.592352	A2m	Genotype effect with no sex effect(real)
710	ONLI_0938	HILICNEG	6-Hydroxycaproic acid	0.000106745	1	0.849778	0.715299	36	6	0.0289873	0.000480796	0.0139212	0.153074	0.00117743	0.355214	0.348175	-0.410233	0.03484	-1.27641	0.287507	0.517483	0.250531	0.750396	0.747844	0.515045	1.21145	0.000408929	-1.10778	0.00115522	0.331671	0.686114	0.528122	A2m	One sex_Female only
716	ONLI_0968	HILICNEG	Galactonic acid	4.71659e-05	1	0.98274	0.976675	33	4	0.00172519	0.00216542	0.00518578	0.0513479	0.00451938	0.329385	0.49924	0.355715	0.0852888	-1.25828	0.00305782	2.01701	0.340885	0.21948	1.71287	0.469377	3.48472	0.303776	-0.312148	0.408651	0.100037	2.96314	0.228698	A2m	One sex_Male only
718	ONLI_0972	HILICNEG	Gentisinic acid	0.190773	1	0.804075	0.58921	37	5	0.011733	0.000699129	0.484908	0.10312	0.00162173	0.832953	0.0250709	1.03147	0.182668	0.761324	0.0272262	1.28996	0.459806	0.507641	1.46047	1.29675	1.72282	0.00102981	-0.987135	0.00266202	0.436978	-0.4585	0.619661	A2m	Genotype effect with no sex effect(real)
729	ONLI_1021	HILICNEG	N-epsilon-Acetyllysine	0.270719	1	0.974762	0.961087	35	5	0.0432305	0.0301102	0.0713608	0.189794	0.0511098	0.550666	0.918654	-0.0486964	0.0565363	-1.33559	0.156427	0.910309	0.300135	0.70724	0.982739	0.628992	1.3091	0.0951989	-0.530644	0.153365	0.192507	1.71526	0.368389	A2m	Genotype effect with no sex effect(real)
737	ONLI_1047	HILICNEG	Theophylline	5.51229e-12	1	0.163263	0.701365	26	5	0.00155615	0.00051074	0.000323727	0.0492365	0.00123925	0.256068	0.81154	-0.116221	0.000104709	-1.30455	0.0464208	1.68221	0.0828246	0.60426	35.763	0.532355	83.7998	0.914769	0.036039	0.936856	0.00378174	3.0228	0.0586541	A2m	Different direction
744	ONLI_1065	BileAcid_Steroids	progesterone	0.00143658	0.999995	0.963788	0.757801	20	6	0.037153	5.92212e-05	0.0235296	0.177036	0.00017159	0.404607	0.199933	-0.585071	0.620785	0.254194	0.00665397	-1.1584	0.815682	0.294102	0.912744	1.24942	0.488961	0.011977	-0.886449	0.0238036	0.0174916	-2.29905	0.0848827	A2m	One sex_Male only
747	ONLI_1071	BileAcid_Steroids	cortexone	0.000794734	1	0.415474	0.731466	20	5	0.0504755	0.0130109	0.0265552	0.19668	0.0238232	0.420104	0.488962	-0.34432	0.155342	0.88488	0.102519	-1.12102	0.431141	0.634574	0.93905	2.03644	0.193977	0.519535	-0.256597	0.626452	0.0510845	-2.2625	0.153885	A2m	Interaction_cannot classify2
765	ONLI_1103	BileAcid_Steroids	Taurochenodeoxycholic acid	3.63637e-06	1	0.907623	0.949972	31	5	0.0240861	0.000181606	0.0771332	0.140365	0.000478835	0.550666	0.151958	0.678488	0.0065629	1.62424	0.57466	0.317794	0.133109	0.83712	2.44836	4.00417	1.09324	0.00525622	-0.896135	0.0113307	0.00246354	-2.20258	0.0581214	A2m	Genotype effect with no sex effect(real)
779	ONLI_1133	Oxylipins	PGE3	0.139537	1	0.471121	0.958244	15	6	0.396418	0.011213	0.0177106	0.612691	0.0207717	0.38277	0.425954	0.382355	0.160225	0.987963	0.695803	-0.180281	0.43854	0.876792	1.42009	1.81911	0.82593	0.205386	-0.644592	0.297546	0.000358983	-1.81284	0.0352288	A2m	Interaction_cannot classify2
781	ONLI_1135	Oxylipins	9,12,13-TriHOME	7.7068e-07	1	0.987774	0.993139	33	6	0.0962909	0.340954	0.0485602	0.268128	0.424464	0.508365	0.107603	0.69951	0.0382285	1.4848	0.861729	-0.0870083	0.256261	0.932459	1.47092	1.90108	0.989181	0.902284	-0.040379	0.931356	0.074082	-1.61219	0.184854	A2m	Interaction_One sex_Female only2
782	ONLI_1138	Oxylipins	9,10-e-DiHO	0.0190073	1	0.991731	0.950633	38	5	0.00665997	0.0222837	0.00661709	0.0752576	0.0387394	0.329385	0.121157	0.724466	0.00807689	2.12961	0.65807	-0.233356	0.152115	0.863258	1.32353	1.83857	0.980973	0.665882	0.12634	0.754602	0.0917514	-2.23663	0.21472	A2m	One sex_Female only
784	ONLI_1140	Oxylipins	9,10-DiHOME	0.396206	1	0.947519	0.674596	36	6	0.00261361	0.0142584	0.00430446	0.0606522	0.0258086	0.329385	0.0601393	0.808426	0.000827076	1.91819	0.632011	-0.293113	0.0951023	0.860449	1.28748	1.68873	0.907796	0.618188	0.147984	0.712808	0.0420709	-2.06331	0.139239	A2m	One sex_Female only
785	ONLI_1141	Oxylipins	15,16-DiHODE	0.847552	1	0.995664	0.999822	37	6	0.0162895	0.0144895	0.0105213	0.123039	0.0261074	0.329385	0.230794	0.521227	0.00364653	1.55747	0.475559	-0.45972	0.113535	0.792766	1.15214	1.59048	0.825461	0.0332298	0.681977	0.0600109	0.054715	-1.33521	0.159116	A2m	One sex_Female only
786	ONLI_1142	Oxylipins	12,13-DiHODE	0.053938	1	0.520504	0.668324	34	6	0.0178596	0.485609	0.0503346	0.127402	0.574165	0.508556	0.0218143	0.978261	0.00141592	1.74823	0.719574	0.233354	0.0951023	0.885018	1.26236	1.56119	1.01524	0.193334	0.426103	0.282153	0.0736679	-1.08878	0.184854	A2m	Genotype effect with no sex effect(real)
787	ONLI_1143	Oxylipins	9,10-DiHODE	0.378362	0.999999	0.975333	0.868299	38	6	0.00539864	0.0354107	0.00974797	0.0726104	0.0593429	0.329385	0.0595969	0.807052	0.0043912	1.82864	0.722645	-0.19946	0.113535	0.885018	1.41038	1.96395	0.924444	0.330608	0.28651	0.438042	0.0909056	-1.74159	0.214139	A2m	One sex_Female only
796	ONLI_1156	Oxylipins	13S-HODE	2.25307e-05	1	0.988672	0.938558	37	6	0.00190371	0.0142532	0.00356892	0.0513479	0.0258086	0.329385	0.0510815	0.836363	0.00121355	1.9682	0.620583	-0.28774	0.0951023	0.855194	1.79516	3.01482	0.837519	0.335662	0.286155	0.443254	0.0332092	-1.96978	0.12325	A2m	One sex_Female only
797	ONLI_1157	Oxylipins	9-HODE	0.208294	1	0.766997	0.630659	37	6	0.0015237	0.0194213	0.00754193	0.0492365	0.0342907	0.329385	0.0204219	0.984568	0.00413483	1.99745	0.947617	-0.0295491	0.113535	0.979545	1.54157	2.0292	1.04396	0.872911	0.0457743	0.912117	0.0546425	-1.98122	0.159116	A2m	One sex_Female only
798	ONLI_1158	Oxylipins	13-HOTE	4.86192e-07	1	0.956177	0.507748	37	5	0.00210593	0.00678527	0.00194472	0.0537353	0.0130588	0.329385	0.100961	0.766221	0.00409099	2.29838	0.490557	-0.346597	0.113535	0.801316	1.94327	4.05016	0.785636	0.109116	0.482991	0.173315	0.0265635	-2.16199	0.107203	A2m	One sex_Female only
799	ONLI_1159	Oxylipins	9-HOTE	0.0175525	1	0.999109	0.980649	38	5	0.00883748	0.0303962	0.0113962	0.0873806	0.0514848	0.333865	0.0981563	0.771445	0.00240876	2.08703	0.860617	-0.109138	0.113535	0.932459	1.67558	2.57986	1.07782	0.917013	0.0287204	0.936975	0.203739	-2.16745	0.383688	A2m	One sex_Female only
812	ONLI_1174	Oxylipins	13-KODE	0.129338	1	0.891774	0.864731	18	6	0.0100362	0.276428	0.035067	0.0923099	0.354383	0.4623	0.0147778	1.07479	0.00418552	1.83903	0.598396	0.310562	0.113535	0.847379	1.57893	2.14066	1.0379	0.962638	0.019942	0.973717	0.00221247	-1.50852	0.0581214	A2m	One sex_Female only
814	ONLI_1176	Oxylipins	15-KETE	0.813848	1	0.86019	0.823925	14	6	0.0913473	0.0167918	0.0184447	0.259913	0.0298479	0.383941	0.114134	0.746242	0.148524	0.974322	0.342647	0.518161	0.424124	0.768749	1.10357	1.12337	1.08091	0.135724	-0.798927	0.208868	0.00216554	-1.25509	0.0581214	A2m	Interaction_cannot classify2
817	ONLI_1179	Oxylipins	1213Ep-9-KODE	5.03416e-05	1	0.95484	0.641091	23	6	0.00476387	1.28034e-06	0.00108043	0.0697819	4.94023e-06	0.313598	0.898186	0.0585962	0.0427879	1.02575	0.0281761	-0.945478	0.273339	0.507641	1.59884	1.84444	0.585013	0.00629926	-0.849123	0.0132519	0.00204395	-2.82035	0.0581214	A2m	Different direction
820	ONLI_1182	Oxylipins	15,16-EpODE	0.590103	1	0.83799	0.779888	39	6	0.0735764	0.0225589	0.0366837	0.230948	0.0391318	0.475685	0.39418	0.370954	0.0751162	1.20375	0.364908	-0.454564	0.333067	0.77118	1.12728	1.36842	0.865073	0.349417	-0.283703	0.457598	0.0464414	-1.94201	0.146355	A2m	Interaction_cannot classify2
823	ONLI_1187	Oxylipins	89-EpETrE	0.00292714	1	0.983563	0.988231	37	6	0.00762671	1.66989e-09	0.533238	0.0815234	1.17936e-08	0.844898	0.062106	-0.801207	0.0288782	-0.908699	0.171456	-0.576098	0.226165	0.717576	0.602415	0.575644	0.716867	1.03392e-07	-1.45061	6.59544e-07	0.017974	-1.11801	0.0858273	A2m	Genotype effect with no sex effect(real)
824	ONLI_1188	Oxylipins	1718-EpETE	0.555523	0.999996	0.946439	0.828864	27	6	0.0423504	0.612549	0.20941	0.189794	0.684359	0.667394	0.0509445	-0.851803	0.129622	-0.909067	0.237448	-0.814635	0.397918	0.750396	0.707357	0.678874	0.72739	0.595126	0.180852	0.69157	0.819198	0.275285	0.902487	A2m	Genotype effect with no sex effect(real)
825	ONLI_1198	Oxylipins	10-Nitrooleate	0.00242908	1	0.957763	0.692864	37	6	0.0132146	0.252269	0.108512	0.112395	0.329826	0.569097	0.0161685	1.01881	0.0131216	1.64296	0.446393	0.407774	0.170151	0.786962	1.93389	2.76302	1.31495	0.115455	0.48481	0.180841	0.327148	-0.750375	0.523834	A2m	Genotype effect with no sex effect(real)
2	ONLI_0002	gctof	xylose	1.40806e-07	1	0.646607	0.963755	35	6	0.00047923	0.18348	0.575965	0.0345045	0.253568	0.833295	0.00071269	1.38695	0.0364778	1.19162	0.00843799	1.59376	0.6566	0.185636	2.87938	2.44649	3.5433	0.178979	-0.40135	0.264461	0.999063	0.0007874	0.999063	Ahcy	Genotype effect with no sex effect(real)
9	ONLI_0011	gctof	trans-4-hydroxyproline	0.396386	1	0.960409	0.989041	39	6	0.011004	0.0302951	0.442319	0.167599	0.0510505	0.780194	0.0184442	0.997558	0.151994	0.701356	0.0521315	1.2763	0.933175	0.369096	1.25249	1.14022	1.38276	0.0289155	-0.680831	0.0535071	0.596815	-0.105885	0.729441	Ahcy	Genotype effect with no sex effect(real)
152	ONLI_0019	gctof	succinic acid	0.257224	1	0.981181	0.993714	38	6	0.0492169	0.0337853	0.478762	0.306928	0.0565708	0.795333	0.0701646	0.777754	0.112022	1.05094	0.326095	0.504564	0.879427	0.679906	1.2766	1.50195	1.09972	0.0261446	0.678744	0.0488361	0.885222	0.132363	0.936426	Ahcy	Genotype effect with no sex effect(real)
24	ONLI_0030	gctof	pinitol	0.180611	1	0.784127	0.947661	39	6	0.0029872	0.376098	0.00746412	0.0815816	0.470568	0.344356	0.0039045	1.2023	0.273902	0.655298	0.00273082	1.7598	0.996608	0.113832	1.48275	1.21173	1.81204	0.171667	-0.409158	0.255823	0.21178	0.695339	0.367024	Ahcy	One sex_Male only
32	ONLI_0040	gctof	oxoproline	0.801248	1	0.897977	0.996739	39	6	0.0208642	0.700447	0.420297	0.21877	0.764124	0.763476	0.0247332	0.953364	0.0343639	1.27418	0.313832	0.632063	0.632935	0.665359	1.14714	1.20256	1.09103	0.95261	-0.0190228	0.965941	0.0684834	-0.661137	0.192712	Ahcy	Genotype effect with no sex effect(real)
45	ONLI_0057	gctof	lauric acid	0.991753	1	0.856802	0.807782	40	6	0.0261294	0.54895	0.346242	0.240634	0.641251	0.73344	0.0305275	0.919315	0.0225393	1.2949	0.407233	0.543727	0.555304	0.729703	1.3096	1.4105	1.20735	0.835182	-0.0640866	0.885494	0.252411	-0.815263	0.410493	Ahcy	Genotype effect with no sex effect(real)
522	ONLI_0064	gctof	inosine	3.23466e-05	1	0.964838	0.94421	35	6	0.0337778	0.00257793	0.0287389	0.262338	0.00537294	0.5173	0.217908	-0.537574	0.682128	0.263634	0.00400366	-1.36726	0.996608	0.14257	0.385016	0.798196	0.17859	0.00262643	0.996603	0.0061151	0.0846475	-0.634287	0.219088	Ahcy	One sex_Male only
53	ONLI_0065	gctof	indoxyl sulfate	1.8119e-06	1	0.796574	0.624352	39	6	0.00581794	0.000388832	0.0919804	0.107158	0.000919268	0.623727	0.019889	0.986395	0.0095475	1.571	0.344118	0.420892	0.499653	0.686686	2.05596	2.57519	1.16633	0.00742154	-0.744908	0.0153148	0.0187458	-1.89501	0.132132	Ahcy	Genotype effect with no sex effect(real)
56	ONLI_0068	gctof	indole-3-acetate	0.109866	1	0.982703	0.999976	40	6	0.0160191	6.73051e-07	0.87307	0.205597	2.53836e-06	0.949387	0.0771971	-0.757683	0.0813072	-0.806359	0.139111	-0.709006	0.795003	0.496377	0.704252	0.741521	0.641591	5.08955e-06	-1.26243	2.12154e-05	0.0307493	-1.16507	0.144948	Ahcy	Genotype effect with no sex effect(real)
57	ONLI_0069	gctof	hydroxylamine	0.212277	1	0.70289	0.230526	37	6	0.0925417	0.0614777	0.0284418	0.389857	0.0969926	0.5173	0.102548	-0.704841	0.93774	-0.0526056	0.00599985	-1.32871	0.996608	0.170442	0.873211	1.01171	0.728825	0.239616	-0.349823	0.337079	0.153125	-1.62593	0.298707	Ahcy	Interaction_One sex_Male only2
62	ONLI_0074	gctof	hexose	0.278529	1	0.995502	0.868063	34	6	0.00479925	0.113699	0.553735	0.0989269	0.168949	0.829033	0.00631277	1.14847	0.0339198	1.3702	0.0881098	0.926753	0.632935	0.43256	1.65341	1.96332	1.41595	0.106767	0.497112	0.169119	0.951164	0.0536691	0.973453	Ahcy	Genotype effect with no sex effect(real)
67	ONLI_0080	gctof	glycerol-alpha-phosphate	0.417377	1	0.999982	0.999979	38	6	0.00918411	0.188875	0.0199189	0.148445	0.259564	0.426372	0.0113959	-1.06687	0.276194	-0.676906	0.0110983	-1.45682	0.996608	0.210226	0.659952	0.761181	0.573587	0.108839	0.48626	0.172057	0.702775	-0.293658	0.809821	Ahcy	One sex_Male only
68	ONLI_0081	gctof	glycerol-3-galactoside	0.0139426	1	0.929539	0.825616	38	6	0.0118342	0.337189	0.551319	0.173568	0.428984	0.828753	0.0144947	-1.03338	0.0736257	-1.2663	0.103337	-0.800453	0.780753	0.456346	0.528958	0.453905	0.601512	0.531894	0.195877	0.636345	0.290466	0.661725	0.449406	Ahcy	Genotype effect with no sex effect(real)
692	ONLI_0082	gctof	glycerol	0.762203	1	0.983211	0.941103	39	6	0.000590591	0.281283	0.714854	0.0345813	0.363419	0.871022	0.000838877	-1.36929	0.0555024	-1.23799	0.00461015	-1.50664	0.737644	0.146049	0.731951	0.75239	0.709274	0.415378	-0.235491	0.522049	0.443703	-0.504136	0.59968	Ahcy	Genotype effect with no sex effect(real)
74	ONLI_0089	gctof	fucose	0.199147	1	0.774943	0.361025	40	6	0.000879163	0.677196	0.0828885	0.0399426	0.751175	0.623727	0.00121469	1.3312	0.00155579	1.97213	0.209646	0.690262	0.231706	0.588794	1.43745	1.6064	1.2725	0.829773	0.0617693	0.885494	0.027964	-1.2201	0.142493	Ahcy	Genotype effect with no sex effect(real)
79	ONLI_0094	gctof	D-erythro-sphingosine	0.00785969	1	0.762445	0.889855	39	6	0.0281526	0.952348	0.102685	0.246781	0.958398	0.623727	0.0328844	-0.908364	0.441262	-0.439988	0.0358557	-1.37412	0.996608	0.30185	0.506141	0.619174	0.396593	0.750648	0.101967	0.821151	0.0154604	-0.832169	0.130799	Ahcy	Genotype effect with no sex effect(real)
941	ONLI_0115	gctof	6-deoxyglucitol	0.0880341	1	0.851487	0.86422	39	6	0.014541	0.536728	0.0661455	0.19856	0.628829	0.620219	0.0175489	1.00477	0.309141	0.649263	0.0192486	1.35829	0.996608	0.232254	1.25776	1.2206	1.29189	0.803982	0.0775886	0.863981	0.163778	0.786615	0.310315	Ahcy	Genotype effect with no sex effect(real)
1001	ONLI_0121	gctof	3,6-anhydro-D-galactose	1.8802e-08	1	0.995736	0.930583	38	6	1.59353e-06	0.0266562	0.851267	0.000631039	0.0456963	0.941625	3.12861e-06	1.80097	0.000513432	1.87137	0.00120493	1.75527	0.135546	0.0719933	2.69946	2.92367	2.46543	0.07045	-0.469156	0.117963	0.0423115	-0.585253	0.158818	Ahcy	Genotype effect with no sex effect(real)
103	ONLI_0124	gctof	2-hydroxyglutaric acid	0.319722	1	0.991237	0.861786	40	6	0.0187672	0.547626	0.113769	0.215955	0.640649	0.632058	0.0222791	0.967847	0.129057	1.03077	0.0945713	0.904928	0.888083	0.445836	1.37812	1.3905	1.36651	0.538794	0.187909	0.643627	0.935058	0.0620724	0.973453	Ahcy	Genotype effect with no sex effect(real)
107	ONLI_0128	gctof	1,3,5-trimethylcyanuric acid	0.0709586	1	0.955575	0.99941	39	6	0.0321847	0.0838623	0.0759492	0.262338	0.12847	0.620219	0.17819	-0.582437	0.603574	0.321087	0.0149229	-1.48034	0.996608	0.222999	0.945592	1.02675	0.866088	0.471451	0.219299	0.581603	0.107525	-1.58213	0.24585	Ahcy	Genotype effect with no sex effect(real)
115	ONLI_0162	CSHPOS	TAG 55:2; TAG 17:0-18:1-20:1;	0.0013489	1	0.919848	0.998607	38	5	0.0386803	1.7327e-05	0.902763	0.275989	5.12052e-05	0.968819	0.17694	0.633368	0.121321	0.714688	0.21755	0.802616	0.881528	0.597311	1.39424	1.42125	1.57803	8.46193e-05	1.16491	0.000272433	0.00295032	1.25284	0.12884	Ahcy	Genotype effect with no sex effect(real)
121	ONLI_0169	CSHPOS	TAG 53:5; TAG 17:1-18:2-18:2;	0.00559126	1	0.854788	0.997331	40	6	0.0802557	1.27121e-07	0.0249636	0.357093	5.4129e-07	0.500763	0.920845	0.0433704	0.13693	-0.649242	0.131094	0.735983	0.898922	0.489651	1.13726	0.716394	1.35149	1.7763e-05	1.10647	6.636e-05	0.0164147	2.4917	0.130799	Ahcy	Interaction_cannot classify2
1221	ONLI_0170	CSHPOS	PC35:3	0.000577802	1	0.182824	0.182824	40	6	0.00439274	1.47229e-13	0.00164905	0.0977506	5.6018e-11	0.344356	0.5771	0.242959	0.175586	-0.49672	0.00381802	0.982638	0.936738	0.14257	1.10634	0.851836	1.22679	2.62253e-10	1.37291	1.56846e-08	0.00744302	2.85227	0.12884	Ahcy	One sex_Male only
125	ONLI_0173	CSHPOS	TAG 53:1; TAG 17:0-18:0-18:1;	0.000265216	1	0.772403	0.977641	34	5	0.0458847	0.00288275	0.617677	0.301044	0.00593024	0.848206	0.16176	0.659591	0.204205	0.640369	0.151335	1.03838	0.975051	0.516628	1.61795	1.5341	1.98666	0.00705701	0.881378	0.0147471	0.0736556	1.27939	0.203259	Ahcy	Genotype effect with no sex effect(real)
127	ONLI_0176	CSHPOS	TAG 47:0; TAG 15:0-16:0-16:0;	0.0192038	1	0.306102	0.874332	39	5	0.0123998	0.000750318	0.772079	0.175368	0.00167868	0.899245	0.0509319	0.903711	0.023097	1.09742	0.239504	0.869723	0.555304	0.621571	1.40139	1.51999	1.42016	0.00264919	0.909683	0.00613496	0.0993774	0.681985	0.238506	Ahcy	Genotype effect with no sex effect(real)
164	ONLI_0214	CSHPOS	PE 40:7e; PE 18:1e/22:6;	0.544263	1	0.841786	0.990211	39	6	0.0245193	0.447917	0.123178	0.233967	0.543262	0.632058	0.0288355	-0.92939	0.17381	-0.855234	0.0927058	-1.00982	0.936738	0.442307	0.882264	0.879325	0.884477	0.395157	0.244747	0.503968	0.94147	0.0901586	0.973453	Ahcy	Genotype effect with no sex effect(real)
1691	ONLI_0221	CSHPOS	DAG 34:2; DAG 16:1-18:1;	0.000418444	1	0.880259	0.999981	38	5	0.0100069	4.32971e-09	0.00866276	0.158509	2.65824e-08	0.350493	0.505885	0.314722	0.677983	-0.184021	0.00355179	1.44522	0.996608	0.140651	1.39832	0.994008	1.94305	7.28686e-07	1.21089	3.69949e-06	0.0380741	2.84013	0.152297	Ahcy	One sex_Male only
1721	ONLI_0224	CSHPOS	PC16:0/9:0COOH	1.90617e-07	1	0.449146	0.627788	39	6	0.0309602	0.0856614	0.017311	0.25811	0.130973	0.391722	0.0359959	0.893614	0.545462	0.336721	0.0193545	1.45933	0.996608	0.232254	2.07526	1.08067	2.86923	0.25934	0.34419	0.36098	0.0294325	1.4668	0.142493	Ahcy	One sex_Male only
176	ONLI_0228	CSHPOS	PC32:2	0.00408958	1	0.812328	0.848243	40	6	0.834262	9.66381e-11	0.0479127	0.934848	8.4107e-10	0.618989	0.897326	-0.0563181	0.141607	-0.5775	0.240937	0.464864	0.907351	0.621571	1.0551	0.807858	1.18177	1.93622e-08	1.36322	1.54898e-07	0.0124524	2.40558	0.130799	Ahcy	Interaction_cannot classify2
1861	ONLI_0238	CSHPOS	TAG 46:3; TAG 12:0-16:1-18:2;	0.000342709	1	0.550712	0.999489	30	5	0.0496578	1.02979e-05	0.0153827	0.307258	3.21099e-05	0.37312	0.749558	-0.153762	0.174441	-0.61608	0.070559	1.11236	0.936738	0.409016	1.04476	0.799528	1.54602	0.00153033	0.981681	0.00376405	0.0245637	2.71012	0.140011	Ahcy	cannot classify
194	ONLI_0247	CSHPOS	Cer-NS d35:1; Cer-NS d18:1/17:0;	0.353038	1	0.981513	0.920398	37	6	0.0266077	0.0106482	0.478266	0.242222	0.0195217	0.795333	0.0388581	0.883138	0.0723728	1.11706	0.259722	0.587171	0.780753	0.630982	1.05332	1.07378	1.02909	0.00864229	0.765226	0.017461	0.831591	0.235337	0.90719	Ahcy	Genotype effect with no sex effect(real)
1981	ONLI_0252	CSHPOS	CE (20:4)	0.0505829	1	0.231359	0.429972	40	6	0.00524612	0.568989	0.0396874	0.0989269	0.661732	0.593065	0.00662932	-1.13646	0.0443918	-0.985427	0.0675791	-1.2875	0.67682	0.409016	0.712071	0.784238	0.639837	0.674552	-0.123149	0.765394	0.625778	-0.425217	0.754363	Ahcy	One sex_Female only
2021	ONLI_0256	CSHPOS	TAG 58:4; TAG 18:1-18:2-22:1;	0.000407241	1	0.616127	0.893382	37	6	0.00368567	1.45242e-11	0.00667958	0.0898981	1.97744e-10	0.344356	0.221187	0.531958	0.71021	-0.148857	0.000645497	1.17706	0.996608	0.0649323	1.86084	1.03609	2.03941	3.21868e-09	1.32147	3.59041e-08	0.0198048	2.64738	0.134064	Ahcy	One sex_Male only
2151	ONLI_0269	CSHPOS	TAG 46:0; TAG 14:0-16:0-16:0;	0.0508076	1	0.858108	0.893439	36	5	0.0183132	0.0706275	0.00565076	0.215955	0.110112	0.344356	0.0222291	1.0523	0.269022	0.575244	0.0148655	1.87534	0.996608	0.222999	1.50792	1.30662	1.82272	0.143739	0.429851	0.218925	0.151259	1.72994	0.298021	Ahcy	One sex_Male only
218	ONLI_0272	CSHPOS	PCp-32:0 or PC o-32:1	0.199864	1	0.88202	0.998839	40	6	0.0349997	0.000429364	0.892788	0.262338	0.00100312	0.962519	0.0748416	-0.763572	0.175474	-0.71594	0.144463	-0.811204	0.936738	0.504028	0.890985	0.926682	0.860921	0.000586962	0.955017	0.00160301	0.413506	0.859752	0.568571	Ahcy	Genotype effect with no sex effect(real)
228	ONLI_0283	CSHPOS	SMd32:1	0.528562	1	0.56677	0.710244	40	6	0.0344137	0.000266423	0.669538	0.262338	0.000651257	0.851202	0.076855	-0.758529	0.0909059	-0.907724	0.255685	-0.609334	0.818153	0.63069	0.854403	0.842656	0.868489	0.000600676	-1.01036	0.00163483	0.237818	-0.711965	0.39653	Ahcy	Genotype effect with no sex effect(real)
2381	ONLI_0293	CSHPOS	TAG 51:4; TAG 15:0-16:0-20:4;	0.00106727	1	0.671353	0.987541	40	6	0.0154473	3.56115e-07	0.0382692	0.205597	1.42446e-06	0.593065	0.13408	0.64558	0.982561	0.0101709	0.00673635	1.28099	0.996608	0.170442	1.49706	1.02687	1.73922	2.98489e-05	1.06524	0.000105068	0.0200908	2.33606	0.134847	Ahcy	One sex_Male only
241	ONLI_0296	CSHPOS	PC 40:8; PC 20:4-20:4;	0.0211093	1	0.474685	0.309881	39	6	0.000907787	3.14943e-13	0.152591	0.0399426	6.23587e-11	0.641493	0.0563929	-0.816656	0.000738458	-1.11708	0.203852	-0.478778	0.146215	0.580758	0.813383	0.739736	0.864286	4.2077e-10	1.46075	1.56846e-08	0.00181847	2.09905	0.12884	Ahcy	Genotype effect with no sex effect(real)
2521	ONLI_0310	CSHPOS	DAG 36:4; DAG 18:2-18:2;	0.010232	1	0.291746	0.917886	40	6	0.0391598	2.25247e-06	0.0328344	0.276915	8.07219e-06	0.541768	0.283264	0.465265	0.629276	-0.225588	0.0236999	1.15612	0.996608	0.246978	1.2388	0.896664	1.46335	0.000243849	0.988059	0.000707429	0.00704459	2.36976	0.12884	Ahcy	One sex_Male only
259	ONLI_0317	CSHPOS	PC 42:10; PC 20:4-22:6;	0.00368561	1	0.341258	0.28472	40	6	0.0351108	5.38233e-12	0.552624	0.262338	1.02641e-10	0.828936	0.228889	-0.520839	0.0685319	-0.663825	0.312823	-0.377854	0.780753	0.665359	0.81753	0.698075	0.872993	8.31576e-10	1.51914	1.78002e-08	0.00345102	1.80511	0.12884	Ahcy	Genotype effect with no sex effect(real)
262	ONLI_0320	CSHPOS	PC36:4 A	0.213193	1	0.995121	1	40	6	0.0286107	5.32809e-08	0.912145	0.246781	2.48227e-07	0.975765	0.127531	-0.656366	0.157169	-0.62414	0.131686	-0.688592	0.936738	0.489651	0.862506	0.871518	0.85578	6.22332e-07	1.3441	3.26415e-06	0.0470688	1.27965	0.170222	Ahcy	Genotype effect with no sex effect(real)
266	ONLI_0324	CSHPOS	PE 36:5e; PE 16:0e/20:5;	0.0298002	1	0.723162	0.828487	39	6	0.0240038	0.00327391	0.981406	0.231842	0.00668282	0.99258	0.0503469	-0.836716	0.0709504	-0.838699	0.188643	-0.855702	0.780753	0.557481	0.86527	0.859872	0.86711	0.0048155	0.817842	0.0104204	0.399297	0.800839	0.558755	Ahcy	Genotype effect with no sex effect(real)
268	ONLI_0326	CSHPOS	TAG 44:1; TAG 12:0-16:0-16:1;	0.0519959	1	0.55753	0.95224	24	5	0.00373136	0.00946089	0.265538	0.0898981	0.0175893	0.706497	0.033741	0.999906	0.127412	0.792582	0.0210251	1.60349	0.888083	0.23757	1.23009	1.15855	1.3991	0.0228072	0.826166	0.0432137	0.00254244	1.63708	0.12884	Ahcy	Genotype effect with no sex effect(real)
2701	ONLI_0328	CSHPOS	TAG 54:5; TAG 18:0-18:2-18:3;	0.0103339	1	0.9982	0.872745	39	6	0.497245	0.00842951	0.00891879	0.810567	0.0159336	0.350493	0.509426	0.287719	0.332812	-0.497847	0.0940929	1.05987	0.996608	0.445836	1.2402	0.744455	1.60848	0.0781594	0.523356	0.128695	0.0335745	2.08107	0.146651	Ahcy	Interaction_cannot classify2
293	ONLI_0351	CSHPOS	PC37:4	0.849542	1	0.983776	0.649216	40	6	0.0377944	0.0048417	0.708866	0.274616	0.0096106	0.871022	0.0648971	-0.79018	0.125591	-0.928802	0.21861	-0.651558	0.888083	0.597311	0.872649	0.850994	0.891975	0.0143996	0.735815	0.0280899	0.134143	1.01306	0.281807	Ahcy	Genotype effect with no sex effect(real)
3041	ONLI_0363	CSHPOS	LPC 15:0	0.212325	1	0.916511	0.9882	40	6	0.00819081	7.29842e-06	0.0155467	0.140673	2.34022e-05	0.37312	0.118002	0.672828	0.800733	-0.124522	0.00414029	1.47018	0.996608	0.14257	1.12462	0.977206	1.24861	0.00142437	0.860067	0.00353636	0.00198613	2.45477	0.12884	Ahcy	One sex_Male only
3051	ONLI_0364	CSHPOS	TAG 44:2; TAG 14:0-14:1-16:1;	7.1888e-07	1	0.522076	0.987856	22	5	0.0163543	3.92442e-05	0.00754535	0.205597	0.000109828	0.344356	0.740305	0.163986	0.370186	-0.427132	0.0201202	1.45824	0.996608	0.23757	1.33435	0.943623	1.92965	0.0166535	0.853964	0.0320914	0.000801819	2.73933	0.12884	Ahcy	One sex_Male only
3081	ONLI_0367	CSHPOS	PC33:2	0.00134203	1	0.333943	0.376628	38	6	0.0292896	5.88642e-12	0.0321022	0.246781	1.0842e-10	0.540956	0.4189	0.352678	0.737177	-0.12608	0.011357	0.906105	0.996608	0.210226	1.16338	0.965161	1.29763	2.93258e-09	1.41874	3.46657e-08	0.00609127	2.45093	0.12884	Ahcy	One sex_Male only
321	ONLI_0382	CSHPOS	PC 40:7e; PC 18:1e/22:6;	0.540436	1	0.907259	0.492247	40	6	0.0291165	0.124219	0.0595315	0.246781	0.182187	0.620219	0.0338409	-0.9027	0.177785	-0.976227	0.0651345	-0.829173	0.936738	0.409016	0.861363	0.851601	0.872015	0.145924	-0.453122	0.221402	0.559783	-0.306068	0.690142	Ahcy	Genotype effect with no sex effect(real)
322	ONLI_0383	CSHPOS	TAG 47:2; TAG 14:0-16:1-17:1;	4.76832e-05	1	0.538226	0.979674	23	5	0.0970641	0.101178	0.0393756	0.392218	0.152055	0.593065	0.113255	0.762148	0.0164631	0.965285	0.148311	1.15129	0.52155	0.512934	1.43257	1.36962	2.06268	0.0833818	0.818381	0.135881	0.00196511	1.00438	0.12884	Ahcy	Interaction_One sex_Female only2
3241	ONLI_0385	CSHPOS	LPC 20:0	4.08489e-06	1	0.196924	0.191618	39	6	0.587972	5.44308e-12	0.0484562	0.856201	1.02641e-10	0.618989	0.7217	-0.155621	0.0847097	-0.619699	0.356386	0.345275	0.818153	0.694735	1.07511	0.835151	1.14875	5.05827e-09	1.43589	5.00768e-08	0.000769857	2.40086	0.12884	Ahcy	Interaction_cannot classify2
3361	ONLI_0397	CSHPOS	Lyso-PAF C-16	0.00154388	1	0.196924	0.191618	39	6	0.0224687	1.70846e-12	0.0318242	0.224965	9.72439e-11	0.540956	0.350998	0.405708	0.823226	-0.0833384	0.00731695	0.931486	0.996608	0.170442	1.09648	0.986547	1.17634	4.32382e-10	1.43257	1.56846e-08	0.0123029	2.44739	0.130799	Ahcy	One sex_Male only
338	ONLI_0399	CSHPOS	CE (22:6)	7.1483e-05	1	0.442295	0.508262	39	6	0.0212287	0.00961337	0.935812	0.21877	0.0177478	0.976073	0.0364013	-0.891771	0.105101	-0.852543	0.138952	-0.912435	0.879427	0.496377	0.704436	0.732967	0.68876	0.0178099	0.723994	0.0342365	0.27116	0.664103	0.430518	Ahcy	Genotype effect with no sex effect(real)
348	ONLI_0409	CSHPOS	TAG 54:5; TAG 16:0-18:1-20:4;	0.515965	1	0.995418	0.955601	40	6	0.752774	0.0188865	0.0420814	0.904727	0.0331666	0.595701	0.759365	0.133629	0.336482	-0.498222	0.241827	0.76548	0.996608	0.621842	1.03221	0.828175	1.20769	0.102953	0.486796	0.164634	0.0965794	1.7505	0.235357	Ahcy	Interaction_cannot classify2
356	ONLI_0417	CSHPOS	LPC 19:0	0.000123016	1	0.182824	0.182824	40	6	0.0122541	6.61865e-13	0.0251303	0.175368	8.73661e-11	0.500763	0.270641	-0.477484	0.00306782	-1.0012	0.901852	0.0462359	0.303714	0.967842	0.948634	0.809412	1.01543	8.12041e-10	1.42925	1.78002e-08	0.00156647	2.47669	0.12884	Ahcy	One sex_Female only
3741	ONLI_0436	CSHPOS	DAG 34:1; DAG 16:0-18:1;	0.000405655	1	0.775468	0.999893	39	4	0.0750234	2.06956e-08	0.025291	0.345457	1.10006e-07	0.500763	0.800667	0.13213	0.210522	-0.627114	0.0876656	0.922983	0.975051	0.43256	1.20895	0.829362	1.44964	1.71706e-06	1.23279	8.09472e-06	0.04007	2.78289	0.154055	Ahcy	Interaction_cannot classify2
381	ONLI_0443	CSHPOS	PE 34:0; PE 17:0-17:0;	0.507865	1	0.915072	0.862777	39	5	0.000256781	0.236751	0.820209	0.020337	0.313556	0.930667	0.000384202	-1.56156	0.031384	-1.48102	0.00514899	-1.66102	0.632935	0.156846	0.861958	0.868602	0.85519	0.274904	0.314942	0.377992	0.695859	0.134948	0.804555	Ahcy	Genotype effect with no sex effect(real)
383	ONLI_0446	CSHPOS	TAG 51:0; TAG 16:0-17:0-18:0;	1.09649e-05	1	0.369532	0.857591	31	6	0.0192568	0.000288942	0.00979494	0.215955	0.00070413	0.350493	0.43732	0.34412	0.334044	-0.532188	0.0156065	1.32	0.996608	0.228896	1.46872	0.871672	1.92158	0.0407183	0.61733	0.0718238	0.0324788	2.46952	0.146651	Ahcy	One sex_Male only
3971	ONLI_0473	CSHNEG	FA 13:0	2.46801e-05	1	0.687097	0.699899	37	5	0.000160888	0.897706	0.861911	0.0159279	0.919771	0.946787	0.000251823	1.60145	0.0138587	1.65465	0.0102938	1.51692	0.499653	0.210226	1.65631	1.68669	1.60171	0.953745	-0.0166462	0.965941	0.836332	-0.154373	0.911107	Ahcy	Genotype effect with no sex effect(real)
4001	ONLI_0476	CSHNEG	FA 15:0	0.279705	1	0.999016	0.94481	38	6	4.90894e-05	0.680145	0.578059	0.00555411	0.752339	0.833295	8.02077e-05	1.57734	0.0340057	1.38186	0.000379835	1.77282	0.632935	0.0601659	1.48895	1.37408	1.6045	0.867826	0.0464028	0.910356	0.475048	0.437372	0.62602	Ahcy	Genotype effect with no sex effect(real)
418	ONLI_0496	CSHNEG	FA 24:0	0.122526	1	0.941746	0.750935	39	6	0.00228793	0.0426999	0.00491357	0.0679339	0.0700173	0.344356	0.01274	1.05049	0.686713	0.16546	0.00729829	1.93587	0.996608	0.170442	1.29034	1.02222	1.55409	0.963544	0.0134935	0.973018	0.0071093	1.78391	0.12884	Ahcy	One sex_Male only
419	ONLI_0497	CSHNEG	FAHFA 24:0; FAHFA 16:0/8:0;	0.68342	1	0.987206	0.835398	37	6	0.0113331	0.853895	0.0717924	0.169355	0.893375	0.620219	0.0139782	1.03957	0.286732	0.751721	0.00776794	1.33125	0.996608	0.175777	1.33947	1.22433	1.46507	0.652365	-0.142032	0.749888	0.543396	0.4375	0.677748	Ahcy	Genotype effect with no sex effect(real)
4291	ONLI_0518	CSHNEG	LPI 18:2	0.188697	1	0.987328	0.971179	39	6	0.0227301	0.862206	0.0724821	0.224965	0.897527	0.620219	0.0268314	0.94072	0.499196	0.410606	0.0175961	1.46608	0.996608	0.232254	1.31004	1.12964	1.50062	0.528542	-0.185383	0.635735	0.417656	0.870092	0.571217	Ahcy	Genotype effect with no sex effect(real)
4461	ONLI_0547	CSHNEG	PE 34:1; PE 16:0-18:1;	9.31076e-05	1	0.539781	0.764928	40	6	0.020954	4.30632e-12	0.00544287	0.21877	1.02641e-10	0.344356	0.967005	-0.0180547	0.0556172	-0.715042	0.0720409	0.678932	0.737644	0.409016	1.34234	0.787878	1.53711	1.07526e-09	1.34609	2.01174e-08	0.0194215	2.74007	0.133755	Ahcy	cannot classify
447	ONLI_0548	CSHNEG	PE 36:6e; PE 16:1e/20:5;	0.000162427	1	0.957506	1	35	6	0.0188998	5.92628e-07	0.149421	0.215955	2.27846e-06	0.641493	0.0811803	-0.753513	0.00532668	-1.16855	0.545039	-0.306236	0.383521	0.789161	0.756824	0.646058	0.823486	4.68345e-05	1.12843	0.000161274	0.0174258	1.99074	0.131694	Ahcy	Genotype effect with no sex effect(real)
4481	ONLI_0549	CSHNEG	Cer-NS d43:1; Cer-NS d19:1/24:0;	0.00177853	1	0.955029	0.961109	40	6	0.0464128	0.00408436	0.229762	0.301114	0.00827318	0.69672	0.07766	0.756542	0.590309	0.313613	0.0278357	1.19947	0.996608	0.272171	1.42743	1.20629	1.75699	0.00299258	-0.901094	0.00681071	0.976925	-0.0152357	0.989417	Ahcy	Genotype effect with no sex effect(real)
451	ONLI_0552	CSHNEG	PE 36:2e; PE 18:1e/18:1;	0.727012	1	0.992637	0.999977	35	6	0.00367475	8.1791e-07	0.380012	0.0898981	3.02703e-06	0.752424	0.0456916	0.858167	0.178512	0.625408	0.010755	1.12596	0.936738	0.210226	1.16474	1.12695	1.2016	4.63186e-06	1.22619	1.94097e-05	0.0523909	1.72674	0.170756	Ahcy	Genotype effect with no sex effect(real)
4781	ONLI_0582	CSHNEG	HexCer-NS d36:1; HexCer-NS d18:1/18:0;	3.19246e-05	1	0.212012	0.229992	37	6	0.0489769	7.38654e-12	0.0170667	0.306928	1.30003e-10	0.391722	0.848876	0.0836072	0.262797	-0.425022	0.0350523	0.732577	0.996608	0.29851	0.717956	0.689695	1.88778	1.59633e-10	-1.73087	1.56846e-08	0.00635106	-0.573269	0.12884	Ahcy	One sex_Male only
481	ONLI_0585	CSHNEG	PC 32:2; PC 14:0-18:2;	0.0471381	1	0.288141	0.634246	40	6	0.046764	4.89515e-12	0.015045	0.301114	1.02641e-10	0.37312	0.785158	0.118936	0.196715	-0.485765	0.0501258	0.723637	0.975051	0.365479	1.11935	0.85649	1.26766	1.99884e-09	1.38434	2.51283e-08	0.0107729	2.59375	0.130799	Ahcy	cannot classify
483	ONLI_0588	CSHNEG	PE 40:5; PE 18:0-22:5;	0.00175197	1	0.191618	0.196924	39	6	0.0196723	1.10924e-12	0.00782628	0.215955	9.72439e-11	0.344356	0.580756	0.241043	0.26841	-0.412454	0.0129301	0.858782	0.996608	0.217887	1.29965	1.03868	1.34119	3.39691e-10	1.39452	1.56846e-08	0.0153097	2.66576	0.130799	Ahcy	One sex_Male only
4851	ONLI_0590	CSHNEG	PC 33:2; PC 15:0-18:2;	0.0348998	1	0.182824	0.182824	40	6	0.0435191	3.19235e-12	0.193382	0.28964	9.72439e-11	0.656116	0.253758	0.494432	0.619316	0.185742	0.0226551	0.803121	0.996608	0.239238	1.20691	1.06451	1.28571	3.19483e-10	1.48534	1.56846e-08	0.0129841	2.10272	0.130799	Ahcy	Genotype effect with no sex effect(real)
4871	ONLI_0593	CSHNEG	PC 34:2e; PC 16:0e/18:2;	0.000144152	1	0.182824	0.182824	40	6	0.0292191	3.19235e-12	0.203917	0.246781	9.72439e-11	0.675741	0.218787	0.532129	0.532967	0.232693	0.0176995	0.831566	0.996608	0.232254	1.12749	1.03067	1.17574	2.95893e-10	1.48776	1.56846e-08	0.0112358	2.08663	0.130799	Ahcy	Genotype effect with no sex effect(real)
502	ONLI_0611	CSHNEG	SM d39:1; SM d16:1/23:0;	9.98737e-05	1	0.196924	0.191618	39	6	0.0409138	1.97828e-12	0.0120221	0.280514	9.72439e-11	0.360116	0.903615	0.0529427	0.139455	-0.536507	0.061389	0.678386	0.905317	0.392098	1.05456	0.888898	1.14253	6.74758e-10	1.40378	1.67003e-08	0.0132891	2.61868	0.130799	Ahcy	cannot classify
5031	ONLI_0613	CSHNEG	PC 35:1; PC 17:0-18:1;	0.235193	1	0.56996	0.463453	39	6	0.00781449	2.59452e-11	0.345424	0.139562	3.06695e-10	0.73344	0.112846	0.683104	0.254345	0.439202	0.0128071	0.889267	0.996608	0.217887	1.22007	1.20822	1.21567	1.06285e-09	1.4718	2.01174e-08	0.0133945	1.92187	0.130799	Ahcy	Genotype effect with no sex effect(real)
506	ONLI_0617	CSHNEG	PC 36:4; PC 16:0-20:4;	0.0106951	1	0.640882	0.541819	38	6	0.0483175	0.000100676	0.831491	0.306928	0.000262286	0.932785	0.094907	-0.719386	0.0931437	-0.765541	0.286504	-0.619699	0.828875	0.648869	0.938212	0.941349	0.940812	0.000484588	1.01712	0.00134194	0.162648	1.16296	0.308913	Ahcy	Genotype effect with no sex effect(real)
515	ONLI_0629	CSHNEG	PC 36:0; PC 16:0-20:0;	4.3458e-07	1	0.476104	0.88213	31	6	0.0358004	0.014369	0.0187047	0.26499	0.025689	0.411503	0.296099	-0.46127	0.069355	-1.34284	0.160745	0.500525	0.780753	0.528686	0.869738	0.742026	1.22232	0.00932326	-0.828962	0.0187412	0.392567	1.0144	0.553978	Ahcy	cannot classify
516	ONLI_0631	CSHNEG	PC 38:6e; PC 18:2e/20:4;	0.00416789	1	0.63673	0.937773	37	6	0.0336152	0.0220022	0.282185	0.262338	0.0382982	0.709493	0.0391926	-0.881709	0.0136703	-1.29479	0.452891	-0.482392	0.499653	0.750015	0.796113	0.691985	0.8836	0.0548555	0.509159	0.0938349	0.363651	1.32155	0.521759	Ahcy	Genotype effect with no sex effect(real)
518	ONLI_0633	CSHNEG	PC 37:4; PC 17:0-20:4;	0.192646	1	0.99897	0.993152	39	6	0.0640302	0.0374478	0.0443018	0.327173	0.062052	0.595701	0.0718732	-0.772198	0.163891	-0.842236	0.239809	-0.68775	0.936738	0.621571	0.887242	0.869229	0.905595	0.0723743	0.561977	0.12047	0.284726	0.716463	0.443031	Ahcy	Interaction_cannot classify2
530	ONLI_0650	CSHNEG	PC 38:5; PC 16:0-22:5;	0.597235	1	0.353528	0.90689	36	5	0.0218663	3.27654e-05	0.275762	0.222027	9.23495e-05	0.706497	0.0971012	-0.775744	0.0135852	-1.32504	0.346716	-0.530326	0.499653	0.686686	0.812385	0.64051	0.880458	0.000439943	1.00341	0.00123122	0.118439	1.79813	0.258411	Ahcy	Genotype effect with no sex effect(real)
5331	ONLI_0653	CSHNEG	PC 38:4	0.146232	1	0.978495	0.985978	40	6	0.0330859	0.000170982	0.669251	0.262338	0.000431268	0.851202	0.0774527	-0.757052	0.266484	-0.609174	0.0783975	-0.90493	0.996608	0.417302	0.883823	0.89616	0.869203	0.000763817	-0.958533	0.00203001	0.131432	-1.25429	0.277584	Ahcy	Genotype effect with no sex effect(real)
5341	ONLI_0654	CSHNEG	PC 38:4; PC 16:0-22:4;	0.146232	1	0.978495	0.985978	40	6	0.0330859	0.000170982	0.669251	0.262338	0.000431268	0.851202	0.0774527	-0.757052	0.266484	-0.609174	0.0783975	-0.90493	0.996608	0.417302	0.883823	0.89616	0.869203	0.000763817	-0.958533	0.00203001	0.131432	-1.25429	0.277584	Ahcy	Genotype effect with no sex effect(real)
548	ONLI_0671	CSHNEG	PC 40:8; PC 18:2-22:6;	0.0621714	1	0.182824	0.182824	40	6	0.00444321	2.00214e-13	0.262242	0.0977506	5.6018e-11	0.706497	0.112902	-0.682057	0.00631521	-0.937366	0.247391	-0.426748	0.416804	0.630012	0.84879	0.765932	0.899424	1.78692e-10	1.49927	1.56846e-08	0.00508977	2.00989	0.12884	Ahcy	Genotype effect with no sex effect(real)
5601	ONLI_0703	HILICPOS	R-Butyrylcarnitine	0.00511751	1	0.9904	0.984264	37	6	0.0016324	0.656142	0.00447461	0.0562113	0.737113	0.344356	0.00223124	1.26788	0.29653	0.641719	0.000794383	1.90258	0.996608	0.0649323	1.55812	1.28941	1.86246	0.273423	-0.315597	0.377056	0.294366	0.945261	0.454459	Ahcy	One sex_Male only
5631	ONLI_0706	HILICPOS	2-Indolinone	7.07431e-06	1	0.996888	0.986231	40	6	0.00201706	1.38305e-07	0.909222	0.0639006	5.82645e-07	0.97443	0.0230759	0.963004	0.0558821	0.929271	0.0257908	0.996736	0.737644	0.261875	1.91863	1.9238	1.90604	2.6861e-06	-1.23865	1.21565e-05	0.0986828	-1.17119	0.237792	Ahcy	Genotype effect with no sex effect(real)
564	ONLI_0707	HILICPOS	3-Hydroxybutyrylcarnitine	0.486407	1	0.128672	0.612314	36	5	0.0212693	4.92933e-06	0.0122701	0.21877	1.64727e-05	0.360116	0.269181	0.521779	0.404821	-0.617481	0.000797449	1.16911	0.996608	0.0649323	1.24484	0.678465	1.46197	0.000965995	0.931907	0.00250022	0.00089417	2.7185	0.12884	Ahcy	One sex_Male only
571	ONLI_0720	HILICPOS	Arg-Ser	0.0517257	1	0.616537	0.974169	22	6	0.00834804	0.4227	0.0296302	0.140673	0.516633	0.521491	0.0118055	-1.09037	0.222476	-0.643114	0.0373271	-1.53188	0.996608	0.307948	0.725063	0.87985	0.569734	0.871925	-0.0632453	0.913446	0.184915	-0.952015	0.332848	Ahcy	One sex_Male only
575	ONLI_0731	HILICPOS	Glu-Lys	0.0430564	1	0.331341	0.17032	38	6	0.0195947	0.729471	0.121415	0.215955	0.789263	0.632058	0.0233923	0.962971	0.279581	0.793676	0.0115996	1.14071	0.996608	0.210226	1.22329	1.15857	1.30076	0.599943	-0.160448	0.69726	0.845039	0.186587	0.91681	Ahcy	Genotype effect with no sex effect(real)
576	ONLI_0732	HILICPOS	Glu-Phe	0.194155	1	0.997644	0.975799	39	6	0.0409321	0.00940393	0.4358	0.280514	0.0175245	0.777373	0.0695769	0.778278	0.41727	0.494282	0.046506	1.07894	0.996608	0.354161	1.19178	1.10062	1.27465	0.0331305	0.649864	0.060182	0.0762637	1.23452	0.204346	Ahcy	Genotype effect with no sex effect(real)
5771	ONLI_0733	HILICPOS	Glycerophosphocholine	0.702667	1	0.507713	0.743094	40	6	0.0141156	0.000513449	0.012791	0.196132	0.00118904	0.361803	0.177716	0.582201	0.53533	-0.325996	0.0100003	1.4904	0.996608	0.210226	1.12978	0.932036	1.38291	0.000389636	-1.03548	0.0010943	0.326008	0.780913	0.485831	Ahcy	One sex_Male only
578	ONLI_0734	HILICPOS	Glycyl-leucine	0.818226	1	0.831115	0.960346	39	6	0.00512153	0.005449	0.471599	0.0989269	0.0107087	0.789655	0.0122746	1.05566	0.108728	0.788388	0.0343966	1.30159	0.879427	0.297782	1.19198	1.12938	1.26024	0.00445629	-0.83211	0.0096961	0.637173	-0.318904	0.763451	Ahcy	Genotype effect with no sex effect(real)
5801	ONLI_0739	HILICPOS	Isovaleryl-L-carnitine	0.0601354	1	0.998263	0.988609	39	6	1.35549e-05	0.0297669	0.347273	0.00283273	0.0503748	0.73344	4.82106e-05	1.61728	0.0138792	1.2992	0.000820728	1.92032	0.499653	0.0649323	1.43777	1.35554	1.52615	0.0286951	-0.586726	0.0532238	0.945641	0.0343905	0.973453	Ahcy	Genotype effect with no sex effect(real)
585	ONLI_0746	HILICPOS	L-Homocitrulline	0.153528	1	0.964029	0.983913	39	6	0.0459928	0.0374506	0.0335396	0.301044	0.062052	0.54211	0.052454	0.829514	0.132315	0.908808	0.206272	0.735883	0.888083	0.581378	1.18392	1.20774	1.15275	0.0640559	-0.559169	0.108868	0.414618	-0.732093	0.569111	Ahcy	cannot classify
5891	ONLI_0751	HILICPOS	N-.alpha.-Acetyl-L-arginine	0.0560659	1	0.955717	0.855655	40	6	0.0501223	0.00409856	0.00699927	0.307728	0.00828077	0.344356	0.303217	0.446656	0.496426	-0.381435	0.0307342	1.27475	0.996608	0.289779	1.11195	0.892694	1.30579	0.111779	0.468828	0.176002	0.0165152	2.12501	0.130799	Ahcy	Interaction_One sex_Male only2
590	ONLI_0752	HILICPOS	N.alpha.-Acetyl-L-lysine	0.818226	1	0.831115	0.960346	39	6	0.00512153	0.005449	0.471599	0.0989269	0.0107087	0.789655	0.0122746	1.05566	0.108728	0.788388	0.0343966	1.30159	0.879427	0.297782	1.19198	1.12938	1.26024	0.00445629	-0.83211	0.0096961	0.637173	-0.318904	0.763451	Ahcy	Genotype effect with no sex effect(real)
592	ONLI_0754	HILICPOS	N-Acetyl-L-carnosine	0.0118266	1	0.999881	0.497	34	5	0.0372497	2.08198e-09	0.140151	0.273165	1.40934e-08	0.638027	0.183701	0.627532	0.0108452	1.11589	0.522601	0.270727	0.499653	0.782783	1.41963	2.54543	1.15527	3.36209e-08	1.59291	2.48858e-07	0.0523723	0.747742	0.170756	Ahcy	Genotype effect with no sex effect(real)
593	ONLI_0756	HILICPOS	N-alpha-Acetyl-L-ornithine	0.543712	1	0.278748	0.553207	39	6	3.46011e-05	0.0130959	0.00945844	0.00548081	0.0236263	0.350493	0.000377989	1.44549	0.321152	0.54155	4.08752e-05	2.3345	0.996608	0.0323732	1.33358	1.12753	1.56502	0.0342679	-0.582122	0.0612645	0.0188522	1.21083	0.132132	Ahcy	One sex_Male only
5981	ONLI_0765	HILICPOS	Pyridoxal	0.000218998	1	0.999999	0.956747	39	5	0.000822637	7.02433e-09	0.653361	0.0399426	4.00235e-08	0.848206	0.0113352	1.1544	0.0379955	0.931118	0.0140955	1.1969	0.662761	0.222999	1.62774	1.56011	1.54788	7.89212e-08	-1.34174	5.2088e-07	0.228184	-1.07596	0.386157	Ahcy	Genotype effect with no sex effect(real)
605	ONLI_0774	HILICPOS	Stearoyl-L-carnitine	0.00995434	1	0.893663	0.933839	37	5	0.0252188	0.0369588	0.0264726	0.235564	0.0616239	0.511374	0.0299593	-1.00132	0.388356	-0.702979	0.0212973	-1.08091	0.996608	0.23757	0.809801	0.839958	0.812524	0.103737	-0.509334	0.16498	0.280286	-0.88727	0.44045	Ahcy	One sex_Male only
606	ONLI_0776	HILICPOS	Thr-Ala	0.033434	1	0.999985	0.999683	39	6	0.0291601	0.00324133	0.922135	0.246781	0.00663343	0.976073	0.0586494	0.809612	0.118674	0.855977	0.174491	0.784419	0.881528	0.544082	1.20618	1.2282	1.1928	0.00423057	0.825733	0.00925584	0.450837	0.754176	0.605191	Ahcy	Genotype effect with no sex effect(real)
6181	ONLI_0798	HILICPOS	Ala-Ile	0.0455122	1	0.998185	0.99844	35	6	0.00088705	0.00046372	0.234245	0.0399426	0.00108019	0.69672	0.0046019	-1.18622	0.155197	-0.770618	0.00134738	-1.52907	0.936738	0.0719933	0.566447	0.713282	0.363986	0.00208255	-0.848841	0.0049531	0.0659246	-1.60729	0.188511	Ahcy	Genotype effect with no sex effect(real)
6211	ONLI_0802	HILICPOS	Cytosine	0.00294934	1	0.682508	0.669262	39	5	1.43067e-05	0.0333487	0.375505	0.00283273	0.0560767	0.748816	8.12704e-05	1.70447	0.0483021	1.37862	0.000127627	2.02983	0.708431	0.0505403	1.96023	1.70624	2.30796	0.0328168	-0.575052	0.0598868	0.889381	0.0761605	0.93824	Ahcy	Genotype effect with no sex effect(real)
630	ONLI_0814	HILICPOS	Putrescine	0.0185025	1	0.683429	0.81477	37	6	0.0548503	0.0596463	0.0396555	0.316591	0.0944797	0.593065	0.0623833	0.800585	0.303569	0.485309	0.105085	1.1283	0.996608	0.456346	1.14116	1.06521	1.21326	0.157766	0.460271	0.237548	0.00739352	1.10326	0.12884	Ahcy	Interaction_cannot classify2
632	ONLI_0816	HILICPOS	1-Methylnicotinamide	0.00989898	1	0.565061	0.865191	37	6	0.0282158	8.25858e-06	0.12685	0.246781	2.61632e-05	0.632058	0.0739329	-0.769015	0.665105	-0.245572	0.000983823	-1.20885	0.996608	0.0649323	0.641428	0.776596	0.439408	0.000282084	-1.03116	0.000806535	0.00212521	-1.99444	0.12884	Ahcy	Genotype effect with no sex effect(real)
6361	ONLI_0821	HILICPOS	4-Guanidinobutyric acid	0.102004	1	0.604914	0.989603	37	6	0.0410853	0.418741	0.141131	0.280514	0.512585	0.638721	0.0474151	0.849341	0.311306	0.584798	0.0827095	1.12839	0.996608	0.43256	1.36334	1.27879	1.44993	0.551213	0.178892	0.652557	0.541519	0.722483	0.677168	Ahcy	Genotype effect with no sex effect(real)
6371	ONLI_0822	HILICPOS	5'-Methylthioadenosine	0.282052	1	0.948379	0.826218	37	6	0.00101877	0.247546	0.00561965	0.0424668	0.325675	0.344356	0.0014282	1.31591	0.10727	1.096	0.000973219	1.51513	0.879427	0.0649323	1.43411	1.34404	1.50825	0.389347	0.255192	0.498163	0.353866	0.674327	0.515188	Ahcy	One sex_Male only
638	ONLI_0823	HILICPOS	6-Methyladenosine	0.00536918	1	0.980877	0.995513	39	6	0.0191299	0.778813	0.1325	0.215955	0.83124	0.634126	0.0227748	0.966001	0.176703	0.886632	0.0714824	1.0429	0.936738	0.409016	1.38416	1.35925	1.40854	0.743997	-0.0962523	0.816451	0.956618	0.0600176	0.974959	Ahcy	Genotype effect with no sex effect(real)
644	ONLI_0835	HILICPOS	Arginine	0.924197	1	0.707087	0.999745	39	6	0.0335152	0.0089904	0.689886	0.262338	0.016873	0.864951	0.0593633	0.807428	0.334268	0.667977	0.0208476	0.966671	0.996608	0.23757	1.12113	1.0928	1.15654	0.0112001	-0.771859	0.0222318	0.511583	-0.473166	0.659964	Ahcy	Genotype effect with no sex effect(real)
6461	ONLI_0837	HILICPOS	Aspartic acid	0.167754	1	0.918978	0.875672	36	6	0.0103403	0.00622201	0.0427476	0.160578	0.012078	0.595701	0.0238275	0.962432	0.66562	0.249018	0.00136351	1.67585	0.996608	0.0719933	1.29247	1.05135	1.50592	0.0423289	0.577657	0.0741692	0.0370802	2.00448	0.151608	Ahcy	One sex_Male only
647	ONLI_0838	HILICPOS	Biliverdin	0.00129293	1	0.995542	0.980798	38	5	0.0419202	0.00286645	0.777002	0.281363	0.00591205	0.901119	0.0562633	0.885551	0.169545	0.960614	0.17744	0.732463	0.936738	0.546818	1.71592	1.99752	1.51871	0.00541801	0.839086	0.0115975	0.498467	0.610934	0.64719	Ahcy	Genotype effect with no sex effect(real)
649	ONLI_0841	HILICPOS	Carnitine	0.643973	1	0.98955	0.843965	40	6	0.0159724	0.580731	0.0857766	0.205597	0.672146	0.623727	0.0191103	0.99134	0.289567	0.726108	0.0174632	1.25657	0.996608	0.232254	1.15661	1.12132	1.19326	0.466207	-0.226841	0.576032	0.559924	0.303623	0.690142	Ahcy	Genotype effect with no sex effect(real)
652	ONLI_0844	HILICPOS	Citrulline	0.337339	1	0.727745	0.936031	38	6	0.0161976	0.00955136	0.0999584	0.205597	0.017689	0.623727	0.0277564	0.936466	0.580702	0.315196	0.00671213	1.51134	0.996608	0.170442	1.15737	1.04372	1.28081	0.00266095	-0.881597	0.00614423	0.711531	0.314544	0.814354	Ahcy	Genotype effect with no sex effect(real)
654	ONLI_0847	HILICPOS	Cystathionine	0.43593	1	0.996974	0.97338	40	6	0.00175683	0.475334	0.0137106	0.0579754	0.571266	0.36196	0.00234436	1.26036	0.0796481	1.0743	0.0132574	1.44642	0.795003	0.218748	1.34336	1.28122	1.40986	0.388458	-0.252063	0.49783	0.863526	0.120063	0.922959	Ahcy	One sex_Male only
6571	ONLI_0850	HILICPOS	gamma-Aminobutyric Acid GABA	0.613042	1	0.938558	0.948921	39	6	0.00374575	0.00168272	0.561558	0.0898981	0.00360193	0.833295	0.0114453	1.06529	0.131216	0.852661	0.0166279	1.25465	0.888083	0.232254	1.22095	1.15535	1.29364	0.00200537	-0.907521	0.00481288	0.299487	-0.505531	0.458788	Ahcy	Genotype effect with no sex effect(real)
6581	ONLI_0851	HILICPOS	gamma-Glutamylleucine	0.0542106	1	0.945942	0.784842	39	6	0.0570647	0.149329	0.0434226	0.318704	0.214644	0.595701	0.0644087	0.792568	0.776577	0.192611	0.00626294	1.38617	0.996608	0.170442	1.25357	1.03187	1.46851	0.426552	0.247999	0.532853	0.0228922	1.44155	0.136943	Ahcy	Interaction_One sex_Male only2
661	ONLI_0854	HILICPOS	Glutamic acid	0.0988167	1	0.942521	0.999988	39	6	0.00485685	6.30091e-08	0.054929	0.0989269	2.88458e-07	0.620219	0.0480258	0.844936	0.504572	0.300969	0.000877601	1.35828	0.996608	0.0649323	1.36192	1.08111	1.55001	1.86162e-06	1.19448	8.62225e-06	0.00460522	2.25178	0.12884	Ahcy	Genotype effect with no sex effect(real)
662	ONLI_0855	HILICPOS	Glutamine	0.217605	1	0.519282	0.512948	38	6	0.0342473	0.000316224	0.519699	0.262338	0.000763566	0.810239	0.0779546	0.757843	0.120576	0.981926	0.202136	0.53376	0.881528	0.579019	1.12859	1.16618	1.08421	0.00205112	-0.917551	0.00490781	0.0485615	-1.36572	0.170756	Ahcy	Genotype effect with no sex effect(real)
663	ONLI_0858	HILICPOS	Glu-Thr	0.736872	1	0.891111	0.554063	40	6	0.0741145	0.0254924	0.00777186	0.345457	0.0438639	0.344356	0.0824202	0.745111	0.935857	0.0519438	0.00436717	1.43828	0.996608	0.144117	1.189	0.975491	1.3844	0.139946	0.440914	0.215219	0.00895505	1.82725	0.128953	Ahcy	Interaction_One sex_Male only2
665	ONLI_0860	HILICPOS	Guanosine	3.69297e-05	1	0.534833	0.460097	25	6	0.0011011	0.762304	0.535314	0.0430376	0.815871	0.818472	0.00174803	-1.30694	0.0713202	-1.53428	0.00687306	-1.07997	0.780753	0.170442	0.253543	0.191988	0.319927	0.995866	-0.00185803	0.995866	0.521528	0.45245	0.666733	Ahcy	Genotype effect with no sex effect(real)
670	ONLI_0866	HILICPOS	Kynurenine	0.00601485	1	0.522961	0.427833	40	6	0.000580982	2.12189e-13	0.30216	0.0345813	5.6018e-11	0.71865	0.0516615	0.831185	0.0020479	1.06327	0.108474	0.599096	0.231706	0.45942	1.32696	1.37933	1.22821	1.8171e-10	-1.48172	1.56846e-08	0.00543704	-1.9459	0.12884	Ahcy	Genotype effect with no sex effect(real)
677	ONLI_0877	HILICPOS	Nicotinamide	0.0194877	1	0.619675	0.807029	40	6	0.00298513	0.36773	0.0122767	0.0815816	0.462289	0.360116	0.00387932	-1.20232	0.148167	-0.80462	0.0116792	-1.60001	0.924003	0.210226	0.573863	0.648281	0.496729	0.607598	-0.152648	0.704565	0.0905988	-0.948042	0.229247	Ahcy	One sex_Male only
678	ONLI_0878	HILICPOS	N-Methylhistidine	0.24162	1	0.592605	0.806786	38	6	0.000611285	0.000239961	0.2378	0.0345813	0.000590214	0.697479	0.00408929	1.1976	0.112033	0.800336	0.00261225	1.54859	0.879427	0.113832	1.25857	1.15134	1.34133	0.00129422	0.879399	0.00323351	0.0130983	1.62765	0.130799	Ahcy	Genotype effect with no sex effect(real)
6821	ONLI_0884	HILICPOS	Pipecolic acid	1.19008e-08	1	0.488864	0.33947	35	5	3.36446e-08	1.56886e-06	0.440917	2.66465e-05	5.64791e-06	0.780194	2.56866e-05	1.7913	0.000144369	2.02329	0.00021098	1.5958	0.11434	0.051615	2.18723	1.77378	2.73686	1.49821e-05	1.06746	5.65039e-05	0.0636975	0.639967	0.186156	Ahcy	Genotype effect with no sex effect(real)
6851	ONLI_0887	HILICPOS	Propionylcarnitine	0.00514958	1	0.671164	0.996261	39	6	4.36766e-05	0.255926	0.246923	0.00555411	0.335585	0.698518	7.10259e-05	1.58736	0.0189535	1.18264	0.00158304	1.9824	0.555304	0.0783607	1.53694	1.42574	1.65379	0.17184	-0.377439	0.255823	0.367465	0.422319	0.525328	Ahcy	Genotype effect with no sex effect(real)
687	ONLI_0889	HILICPOS	S-Adenosyl-homocysteine	0.000131399	1	0.962807	0.992584	32	6	0.0512667	0.665065	0.0443767	0.312333	0.742922	0.595701	0.0595334	0.815705	0.979989	0.0158697	0.00689382	1.61554	0.996608	0.170442	1.46769	0.835751	2.2979	0.263373	-0.387853	0.36467	0.0280384	1.21182	0.142493	Ahcy	Interaction_One sex_Male only2
689	ONLI_0892	HILICPOS	Targinine	0.194496	1	0.873468	0.392309	40	6	0.039634	1.99671e-05	0.568634	0.277789	5.83541e-05	0.833295	0.103219	0.700489	0.355584	0.511193	0.0531275	0.889785	0.996608	0.369096	1.15523	1.08997	1.24567	7.72923e-05	-1.15765	0.000254006	0.0425663	-0.779056	0.159021	Ahcy	Genotype effect with no sex effect(real)
6911	ONLI_0896	HILICPOS	TMAO	5.75975e-05	1	0.215792	0.221749	37	6	0.00231593	5.74141e-13	0.682531	0.0679339	8.73661e-11	0.860799	0.102954	0.704036	0.0216057	0.816968	0.0785075	0.632812	0.555304	0.417302	1.52291	1.57401	1.43684	3.00546e-10	-1.54316	1.56846e-08	0.0134034	-1.72732	0.130799	Ahcy	Genotype effect with no sex effect(real)
696	ONLI_0916	HILICNEG	2-Deoxyuridine	0.846743	1	0.54363	0.779459	36	6	0.0491365	0.020486	0.0282274	0.306928	0.0358959	0.5173	0.302406	0.450455	0.0147919	1.31674	0.523425	-0.415825	0.509356	0.782783	1.15966	1.43918	0.844842	0.409932	-0.250481	0.518636	0.0767187	-1.98304	0.204346	Ahcy	One sex_Female only
700	ONLI_0920	HILICNEG	2-Hydroxyquinoline	1.3495e-05	1	0.999535	0.997015	37	5	0.111907	3.76145e-07	0.0404525	0.40673	1.49702e-06	0.593304	0.402853	0.395727	0.0117982	1.3462	0.96459	-0.0212049	0.499653	0.992669	1.81022	2.69794	0.871019	2.40037e-05	-1.14551	8.72061e-05	0.0166491	-2.51291	0.130799	Ahcy	Interaction_One sex_Female only2
702	ONLI_0924	HILICNEG	3-Hydroxyoctanoic acid	0.000604208	1	0.743884	0.80538	36	5	0.0199049	0.000898666	0.00704784	0.215955	0.00199368	0.344356	0.603445	0.246808	0.0103281	1.62978	0.320337	-0.593227	0.499653	0.674662	1.46023	2.43008	0.687717	0.0972288	-0.491689	0.156833	0.0261486	-2.7147	0.142412	Ahcy	One sex_Female only
7291	ONLI_1021	HILICNEG	N-epsilon-Acetyllysine	0.117876	1	0.977048	0.871907	35	6	0.0625947	0.052907	0.0494759	0.327173	0.0851673	0.620219	0.0711443	0.778654	0.0871266	0.956301	0.336969	0.61607	0.818153	0.686065	1.20283	1.23028	1.17687	0.0825411	-0.527196	0.134789	0.455358	-0.867427	0.607745	Ahcy	Interaction_cannot classify2
736	ONLI_1042	HILICNEG	S-Sulfocysteine	0.00310242	1	0.668627	0.618022	35	5	0.00114115	0.905795	0.101099	0.0430376	0.925664	0.623727	0.00162994	1.40798	0.000487611	2.18652	0.195735	0.858148	0.135546	0.572036	2.13619	3.32271	1.37663	0.664494	0.129404	0.757237	0.179838	-1.19897	0.326678	Ahcy	Genotype effect with no sex effect(real)
758	ONLI_1095	BileAcid_Steroids	Tauroursodeoxycholic acid	0.00128124	1	0.161445	0.258084	22	6	0.00394577	5.92659e-05	0.0112212	0.0919132	0.000161301	0.360116	0.0783036	-0.78633	0.00867545	-1.50679	0.870271	0.0648411	0.490783	0.954646	0.470305	0.382291	0.926084	2.53184e-05	-1.43788	9.15624e-05	0.871825	0.13375	0.927211	Ahcy	One sex_Female only
763	ONLI_1101	BileAcid_Steroids	Glycocholic acid	8.06996e-07	1	0.998659	0.764119	28	6	0.00792965	7.66262e-09	0.00274697	0.139562	4.33485e-08	0.344356	0.444487	0.341727	0.170625	-0.575007	0.0107688	1.01138	0.936738	0.210226	0.779907	0.534646	2.67363	2.10814e-08	-1.72955	1.66307e-07	0.805183	-0.143159	0.885702	Ahcy	One sex_Male only
7651	ONLI_1103	BileAcid_Steroids	Taurochenodeoxycholic acid	0.0477944	1	0.890169	0.744834	31	6	0.0252815	0.00290966	0.657956	0.235564	0.00597008	0.848206	0.0847138	0.750867	0.0591201	0.979873	0.278595	0.664138	0.755211	0.643287	1.46945	1.48845	1.68142	0.00809124	-0.882111	0.0164737	0.132341	-1.19785	0.278761	Ahcy	Genotype effect with no sex effect(real)
768	ONLI_1106	BileAcid_Steroids	Ursodeoxycholic acid	6.81162e-06	1	0.274453	0.985918	26	6	0.000249986	9.41669e-07	0.0027036	0.020337	3.46885e-06	0.344356	0.014791	1.04888	0.970577	-0.0160989	0.000260682	1.64053	0.996608	0.051615	1.79666	0.873773	3.61284	5.40944e-07	-1.53829	2.91447e-06	0.870732	0.118334	0.927211	Ahcy	One sex_Male only
7811	ONLI_1135	Oxylipins	9,12,13-TriHOME	1.57787e-06	1	0.999834	0.99451	33	6	0.0166434	0.935663	0.125032	0.205962	0.946418	0.632058	0.0205159	0.98877	0.170945	0.97219	0.0597481	1.00468	0.936738	0.38472	1.70969	1.63041	1.79196	0.943536	-0.0221474	0.960515	0.99269	0.0103406	0.998976	Ahcy	Genotype effect with no sex effect(real)
801	ONLI_1162	Oxylipins	12S-HETE	6.45201e-06	1	0.691832	0.894774	37	6	0.0350607	0.033989	0.0101784	0.262338	0.0567918	0.350493	0.764501	-0.131398	0.0238388	-1.17976	0.188209	0.921704	0.555304	0.557481	0.967054	0.398624	1.4919	0.580278	-0.175532	0.68086	0.036843	1.92593	0.151608	Ahcy	One sex_Female only
803	ONLI_1164	Oxylipins	11-HETE	0.000211597	1	0.150895	0.671962	35	6	0.00898521	0.00852499	0.00494138	0.148256	0.0160757	0.344356	0.245606	0.506945	0.23538	-0.585378	0.0190251	1.6192	0.996608	0.232254	1.2488	0.682649	2.02877	0.0334386	-0.69763	0.0604362	0.0137991	1.50695	0.130799	Ahcy	One sex_Male only
804	ONLI_1165	Oxylipins	9-HETE	0.0797632	0.99999	0.996485	0.973434	34	6	0.00501743	0.013278	0.0134583	0.0989269	0.0239005	0.36196	0.164838	0.604378	0.274436	-0.51664	0.0159816	1.78061	0.996608	0.230135	1.13333	0.882994	1.4147	0.143671	-0.469294	0.218925	0.0377105	1.82795	0.151608	Ahcy	One sex_Male only
806	ONLI_1167	Oxylipins	15-HEPE	0.119823	0.999998	0.748093	0.795734	16	6	0.00149629	0.000311668	0.000423845	0.0538665	0.000754866	0.335685	0.50749	-0.315786	0.00428476	-1.57885	0.114325	0.947281	0.377059	0.470267	0.991046	0.590647	1.38739	0.906399	0.0465184	0.935453	0.00174933	2.57265	0.12884	Ahcy	One sex_Female only
8121	ONLI_1174	Oxylipins	13-KODE	0.168051	1	0.421453	0.854433	18	6	0.0415736	0.739249	0.228768	0.281363	0.797664	0.69672	0.0536942	-0.87212	0.0896924	-0.793238	0.255435	-0.951002	0.818153	0.63069	0.634565	0.56908	0.697637	0.670748	0.168033	0.762647	0.992947	0.0102685	0.998976	Ahcy	Genotype effect with no sex effect(real)
8141	ONLI_1176	Oxylipins	15-KETE	0.0466733	1	0.776689	0.980859	14	6	0.0382607	0.0226772	0.00696647	0.275477	0.0393866	0.344356	0.0524874	-0.900395	0.373821	-0.529739	0.0362068	-1.27105	0.996608	0.30185	0.788606	0.921682	0.636264	0.15307	-0.675435	0.2318	0.0417026	-1.41675	0.158031	Ahcy	One sex_Male only
818	ONLI_1180	Oxylipins	1213-EpOME	0.0356951	1	0.999889	0.923148	39	6	0.0191578	0.0400824	0.0466769	0.215955	0.0658615	0.616135	0.228639	0.52191	0.476403	-0.490962	0.00244103	1.5436	0.996608	0.113723	1.1995	0.877797	1.56026	0.25754	-0.344068	0.359738	0.0790809	1.6905	0.20808	Ahcy	One sex_Male only
826	ONLI_1200	Oxylipins	10-Nitrolinoleate	2.12269e-07	1	0.791241	0.99038	25	6	0.0230078	6.32444e-07	0.066655	0.224965	2.41978e-06	0.620219	0.0395837	0.900602	0.00786903	1.10194	0.785142	0.120882	0.479406	0.910494	1.42849	2.02272	0.892731	6.6806e-06	1.60661	2.6858e-05	0.0375111	0.62555	0.151608	Ahcy	Genotype effect with no sex effect(real)
14	ONLI_0018	gctof	sucrose	4.781e-05	1	0.512257	0.677988	38	6	0.0301217	0.380315	0.134747	0.184436	0.473441	0.662161	0.0351896	-0.898289	0.109665	-0.866663	0.173227	-0.929914	0.33625	0.903749	0.526461	0.574555	0.489524	0.405527	0.263639	0.512709	0.783701	0.200388	0.880964	Atp5b	Genotype effect with no sex effect(real)
154	ONLI_0019	gctof	succinic acid	0.338605	1	0.997275	0.97448	38	6	0.0958682	0.0312965	0.0379585	0.289797	0.0531501	0.622641	0.559729	0.254952	0.108347	1.08793	0.266578	-0.578029	0.333505	0.931915	1.1155	1.44582	0.856229	0.0256056	0.691078	0.0478132	0.338928	-0.974885	0.490961	Atp5b	Interaction_cannot classify2
16	ONLI_0020	gctof	stearic acid	0.574968	1	0.598626	0.254525	40	6	0.00423932	0.196283	0.0159027	0.0675659	0.274726	0.59673	0.00541395	1.16188	0.0955812	1.01118	0.0247899	1.31258	0.317385	0.43905	1.19551	1.17198	1.21798	0.269941	0.326813	0.373838	0.353792	0.628212	0.50469	Atp5b	One sex_Male only
26	ONLI_0032	gctof	phosphate	8.59954e-07	1	0.111974	0.510493	39	4	0.0048155	0.0501016	0.0134913	0.0702706	0.0812346	0.59673	0.0352039	1.07299	0.915746	-0.0653411	0.00590593	2.20485	0.967679	0.246212	2.62213	0.969643	4.44197	0.391394	-0.252135	0.500839	0.0980174	2.01806	0.203127	Atp5b	One sex_Male only
29	ONLI_0035	gctof	phenol	0.220402	1	0.728713	0.74372	40	6	0.0442858	0.705501	0.0879267	0.211498	0.768928	0.659961	0.0504531	-0.835336	0.683984	-0.222454	0.0313581	-1.44822	0.863749	0.465515	0.692357	0.908097	0.483171	0.863536	0.0519204	0.902475	0.188524	-1.17384	0.312752	Atp5b	Genotype effect with no sex effect(real)
35	ONLI_0045	gctof	myristic acid	0.693937	1	0.998994	0.854262	40	6	0.0106177	0.628325	0.171901	0.111556	0.698977	0.662161	0.0129593	1.04714	0.00844775	1.58048	0.400525	0.513793	0.141358	0.94265	1.15815	1.25068	1.06988	0.3656	0.267888	0.474617	0.343408	-0.798803	0.493806	Atp5b	Genotype effect with no sex effect(real)
40	ONLI_0050	gctof	maltose	0.000153651	1	0.85355	0.903349	39	6	0.0497748	0.00123554	0.828175	0.216882	0.0026821	0.943942	0.0858919	-0.738074	0.141931	-0.805766	0.248328	-0.648417	0.377843	0.931915	0.688543	0.671791	0.705605	0.00311625	0.856625	0.00713838	0.296316	1.01397	0.441392	Atp5b	Genotype effect with no sex effect(real)
42	ONLI_0052	gctof	lyxose	0.000323775	1	0.971341	0.994324	37	5	0.0727786	0.181002	0.0452924	0.254887	0.256528	0.635599	0.110065	0.747121	0.780454	-0.218309	0.00521341	1.51023	0.905098	0.246212	1.45153	0.708507	2.44383	0.0500511	-0.631573	0.0864918	0.0416733	1.09696	0.117535	Atp5b	Interaction_One sex_Male only2
43	ONLI_0053	gctof	lyxitol	0.430264	1	0.938939	0.874095	40	6	0.0188778	0.589408	0.119565	0.15026	0.663504	0.662161	0.022404	-0.967501	0.119602	-0.976646	0.111569	-0.958355	0.34906	0.725256	0.690466	0.695078	0.685729	0.619567	-0.156444	0.715863	0.74802	-0.138154	0.854261	Atp5b	Genotype effect with no sex effect(real)
453	ONLI_0057	gctof	lauric acid	0.422537	1	0.740157	0.659865	40	6	0.0269523	0.513028	0.310202	0.18266	0.5986	0.731944	0.0314419	0.914586	0.01414	1.31886	0.452615	0.510309	0.168824	0.94265	1.29744	1.41636	1.17693	0.805105	-0.0714572	0.860821	0.436761	-0.88001	0.593392	Atp5b	Genotype effect with no sex effect(real)
48	ONLI_0060	gctof	isothreonic acid	0.485512	1	0.999991	0.999947	39	5	0.000654942	7.65921e-08	0.000128664	0.0245759	3.35303e-07	0.101387	0.7726	0.136802	0.00306245	-1.57118	0.0284699	1.11906	0.10055	0.450752	1.07705	0.579212	1.30027	0.000824	0.831743	0.00217161	0.00451723	3.52198	0.0504667	Atp5b	Different direction
49	ONLI_0061	gctof	isoleucine	0.425009	1	0.926102	0.630231	40	6	0.0102544	0.032145	0.217197	0.111443	0.0543567	0.696237	0.0171781	-1.00699	0.0128015	-1.46998	0.343201	-0.543999	0.167327	0.93942	0.761862	0.692672	0.843181	0.0147786	-0.680644	0.0288971	0.821735	0.24534	0.904503	Atp5b	Genotype effect with no sex effect(real)
524	ONLI_0064	gctof	inosine	0.000485355	1	0.811622	0.250822	35	5	0.00463604	0.00156758	0.46742	0.0689283	0.00332953	0.811294	0.0274025	1.0184	0.139041	0.876823	0.0117613	1.42042	0.375221	0.348117	2.06345	1.90304	2.40768	0.00353636	0.885103	0.00791662	0.0363818	1.4287	0.109423	Atp5b	Genotype effect with no sex effect(real)
542	ONLI_0066	gctof	indole-3-propionic acid	0.0589744	1	0.962976	0.980817	38	6	0.0339371	0.0287859	0.0666361	0.189012	0.0495268	0.659961	0.789601	0.116828	0.214445	-0.924368	0.00426427	1.18303	0.474798	0.240018	1.05393	0.624869	1.62894	0.144405	-0.475094	0.221384	0.00442258	1.6323	0.0504667	Atp5b	Genotype effect with no sex effect(real)
572	ONLI_0069	gctof	hydroxylamine	0.292597	1	0.952173	0.508308	37	6	0.000370314	0.249442	0.637189	0.0191886	0.34085	0.877295	0.000548278	-1.41127	0.0224196	-1.56805	0.00498644	-1.22694	0.218107	0.246212	0.771469	0.74233	0.808575	0.245424	-0.339805	0.345965	0.998426	0.00130485	0.998943	Atp5b	Genotype effect with no sex effect(real)
60	ONLI_0072	gctof	hippuric acid	2.53389e-05	1	0.841485	0.582955	40	6	0.0154723	0.751277	0.279205	0.132523	0.797544	0.702919	0.0185405	0.995769	0.0506467	1.42352	0.222822	0.568014	0.260847	0.93081	2.19144	2.87909	1.60641	0.521416	0.196564	0.625382	0.314345	-0.658946	0.463594	Atp5b	Genotype effect with no sex effect(real)
623	ONLI_0074	gctof	hexose	0.237382	1	0.961228	0.76699	34	4	0.00577775	0.095144	0.797988	0.0813012	0.143079	0.935449	0.00762493	1.3391	0.0615227	1.45281	0.0553854	1.22538	0.282345	0.6147	1.83927	2.12077	1.62358	0.113906	0.487684	0.179158	0.831961	0.26026	0.907635	Atp5b	Genotype effect with no sex effect(real)
66	ONLI_0079	gctof	glycine	0.883991	1	0.982893	0.993319	40	6	0.0182871	0.0310461	0.810592	0.148559	0.0529531	0.941992	0.0296122	-0.924167	0.12901	-0.833161	0.102398	-1.01517	0.362473	0.721992	0.851829	0.847924	0.85536	0.0317786	0.625035	0.0573032	0.643481	0.443022	0.765957	Atp5b	Genotype effect with no sex effect(real)
672	ONLI_0080	gctof	glycerol-alpha-phosphate	0.482241	1	0.999766	0.998612	38	6	0.0238149	0.0506516	0.0174503	0.171855	0.0819578	0.597862	0.0281519	0.934239	0.320198	0.612684	0.0256298	1.25579	0.59637	0.43905	1.34058	1.23296	1.43239	0.116156	0.470796	0.18197	0.219831	1.11391	0.350662	Atp5b	One sex_Male only
693	ONLI_0082	gctof	glycerol	1.33664e-08	1	0.9213	0.987092	39	3	0.00024095	0.412013	0.900485	0.0172608	0.503358	0.969349	0.000368765	1.96774	0.0112797	1.88569	0.025507	2.01504	0.155937	0.43905	2.6812	2.57373	2.82602	0.440005	-0.216887	0.546884	0.90004	-0.0875381	0.951989	Atp5b	Genotype effect with no sex effect(real)
86	ONLI_0103	gctof	capric acid	0.373224	1	0.975879	0.765143	37	6	0.0033336	0.639812	0.225757	0.0597018	0.7086	0.696237	0.00438605	1.18999	0.0141195	1.65156	0.160315	0.728311	0.168824	0.865262	1.22401	1.33221	1.11644	0.989477	0.0040744	0.990734	0.114663	-0.919172	0.223649	Atp5b	Genotype effect with no sex effect(real)
871	ONLI_0104	gctof	beta-alanine	0.733015	1	0.747181	0.783598	37	6	0.0235933	0.0804485	0.0308636	0.171855	0.123094	0.615397	0.0280122	-0.93614	0.151437	-0.887707	0.071774	-1.0289	0.393836	0.637342	0.78224	0.794955	0.763393	0.0766405	0.546737	0.126609	0.640181	0.40554	0.764337	Atp5b	cannot classify
89	ONLI_0109	gctof	aminomalonate	9.52512e-07	0.067658	0.493867	0.0680622	36	6	0.00171356	0.715831	0.97127	0.0382594	0.774828	0.98502	0.00235334	-1.20028	0.00497631	-1.18465	0.0760899	-1.21059	0.140048	0.637342	0.207553	0.229195	0.197135	0.751578	0.0956319	0.824852	0.836698	0.0696938	0.908691	Atp5b	Genotype effect with no sex effect(real)
92	ONLI_0113	gctof	alanine	0.13275	1	0.861859	0.897781	36	6	0.000747935	0.485975	0.850322	0.0267897	0.574998	0.954475	0.00107511	-1.34578	0.0223534	-1.41565	0.0266112	-1.2759	0.218107	0.446162	0.666625	0.619808	0.711152	0.58452	0.161143	0.685181	0.714811	0.300889	0.833241	Atp5b	Genotype effect with no sex effect(real)
991	ONLI_0120	gctof	3-aminoisobutyric acid	0.770747	1	0.860333	0.913715	39	6	0.0249818	0.350282	0.107239	0.174209	0.445917	0.659961	0.0293525	-0.926518	0.159901	-0.779553	0.108322	-1.06576	0.401807	0.725256	0.639407	0.672576	0.611969	0.345395	0.301299	0.453618	0.973217	0.015093	0.989523	Atp5b	Genotype effect with no sex effect(real)
1002	ONLI_0121	gctof	3,6-anhydro-D-galactose	2.29238e-08	1	0.999527	0.994277	38	6	1.59353e-06	0.0473313	0.701548	0.000627852	0.0772521	0.89598	3.12861e-06	1.80097	0.00143115	1.69342	0.000542875	1.93322	0.0709452	0.0846178	2.3854	2.47976	2.29478	0.07045	-0.469156	0.117616	0.530875	-0.229362	0.673638	Atp5b	Genotype effect with no sex effect(real)
1111	ONLI_0158	CSHPOS	AC 14:1	0.0565391	1	0.357043	0.764782	39	6	0.0549436	0.0425103	0.0371403	0.225816	0.0700797	0.622641	0.0621275	0.799168	0.187707	0.991345	0.082371	0.620537	0.448222	0.66233	1.38597	1.42091	1.35126	0.0959121	-0.528334	0.154242	0.0384664	-0.899142	0.111851	Atp5b	Interaction_cannot classify2
1121	ONLI_0159	CSHPOS	TAG 54:7; TAG 18:2-18:2-18:3;	5.89538e-05	1	0.648351	0.693063	39	6	0.046674	0.00231397	0.445562	0.214737	0.00474845	0.806768	0.077998	-0.756699	0.0463933	-1.0259	0.435425	-0.468061	0.253127	0.94265	0.505802	0.396119	0.567014	0.0106931	0.758037	0.0212245	0.107052	1.31588	0.214104	Atp5b	Genotype effect with no sex effect(real)
117	ONLI_0164	CSHPOS	PE38:4	0.333593	1	0.221749	0.215792	38	5	0.0112223	1.08506e-12	0.158309	0.115151	8.11474e-11	0.662161	0.283397	-0.505274	0.00766363	-1.08545	0.323729	-0.370374	0.141358	0.93942	0.909308	0.692925	0.932118	5.43864e-10	1.51129	1.29868e-08	0.00682679	2.22637	0.0598903	Atp5b	Genotype effect with no sex effect(real)
1261	ONLI_0175	CSHPOS	TAG 60:13; TAG 18:2-20:5-22:6;	0.00246716	1	0.906807	0.8199	40	6	0.111952	0.00508565	0.0143418	0.309138	0.00975058	0.59673	0.99913	-0.00047573	0.172251	0.810689	0.152128	-0.81164	0.429536	0.848604	1.09389	1.37079	0.735944	0.0875614	-0.4761	0.14139	0.111174	-2.09843	0.219012	Atp5b	Interaction_cannot classify2
134	ONLI_0183	CSHPOS	TAG 52:7; TAG 16:1-18:2-18:4;	0.00461953	1	0.911208	0.99995	40	6	0.0165521	9.85629e-09	0.270817	0.138756	5.39358e-08	0.696237	0.0976727	-0.711653	0.0126658	-1.02642	0.397852	-0.39688	0.167327	0.94265	0.674436	0.526844	0.743108	1.09557e-06	1.26049	5.20066e-06	0.0165537	1.89003	0.0752931	Atp5b	Genotype effect with no sex effect(real)
153	ONLI_0202	CSHPOS	PE 16:0-20:4	0.00494208	1	0.182824	0.182824	40	6	0.00118367	8.48557e-14	0.135869	0.031091	3.34332e-11	0.662161	0.0732502	-0.767634	0.000872334	-1.09671	0.234108	-0.438559	0.0709452	0.931915	0.779308	0.542493	0.866973	1.43155e-10	1.48003	1.09617e-08	0.00113411	2.13818	0.0406017	Atp5b	Genotype effect with no sex effect(real)
1561	ONLI_0206	CSHPOS	TAG 52:5; TAG 16:0-18:2-18:3;	0.000988831	1	0.883828	0.883645	39	6	0.0483353	0.000171098	0.439342	0.214737	0.000426661	0.806768	0.0966415	-0.714746	0.0540628	-0.970905	0.434009	-0.434729	0.262972	0.94265	0.581633	0.486383	0.636521	0.00115082	0.930426	0.00291589	0.0984452	1.4666	0.203127	Atp5b	Genotype effect with no sex effect(real)
1621	ONLI_0212	CSHPOS	TAG 56:2; TAG 16:0-18:1-22:1;	8.88046e-06	1	0.348248	0.406875	37	6	0.0245036	5.32417e-12	0.102228	0.1724	8.93572e-11	0.659961	0.184286	-0.576366	0.00615755	-0.94262	0.655814	-0.171138	0.141358	0.946271	0.706634	0.437071	0.782805	3.01781e-09	1.44203	3.44643e-08	0.00684026	2.21351	0.0598903	Atp5b	Genotype effect with no sex effect(real)
165	ONLI_0215	CSHPOS	SMd40:1	3.35564e-05	1	0.196924	0.191618	39	6	0.0140621	5.44308e-12	0.773022	0.123268	8.93572e-11	0.929348	0.183696	0.575283	0.146534	0.527596	0.0681876	0.662737	0.382712	0.637342	1.15861	1.10436	1.19796	3.15089e-10	1.55093	1.09617e-08	0.0105818	1.68607	0.0689166	Atp5b	Genotype effect with no sex effect(real)
1671	ONLI_0218	CSHPOS	SMd40:2 A	6.54447e-05	1	0.182824	0.182824	40	6	0.0335173	3.19235e-12	0.5982	0.189012	8.11474e-11	0.867403	0.230166	0.519437	0.28672	0.394008	0.0738828	0.644866	0.555125	0.637342	1.23987	1.06336	1.29554	7.148e-10	1.53315	1.54612e-08	0.000236775	1.78401	0.0338817	Atp5b	Genotype effect with no sex effect(real)
1722	ONLI_0224	CSHPOS	PC16:0/9:0COOH	0.00470002	1	0.362856	0.636453	39	6	0.0195876	0.0996748	0.0240095	0.152822	0.149607	0.615397	0.0232924	0.962575	0.267474	0.615351	0.0367798	1.31956	0.532246	0.517544	1.69543	1.37864	1.95398	0.218036	0.380486	0.311819	0.0581878	1.08469	0.143737	Atp5b	One sex_Male only
173	ONLI_0225	CSHPOS	PE 36:3; PE 18:1-18:2;	0.0043951	1	0.28472	0.341258	40	6	0.00111419	1.43002e-13	0.453542	0.031091	3.75619e-11	0.806768	0.0686108	-0.779888	0.0062532	-0.948431	0.09557	-0.611345	0.141358	0.705269	0.672943	0.506022	0.734528	2.40603e-10	1.51247	1.09617e-08	9.90265e-05	1.84956	0.0338817	Atp5b	Genotype effect with no sex effect(real)
179	ONLI_0231	CSHPOS	PE34:2	0.00193591	1	0.395492	0.48592	40	6	0.00089937	2.15477e-13	0.0779808	0.0279645	4.15189e-11	0.659961	0.0610614	-0.801315	0.000278388	-1.19481	0.280917	-0.407822	0.0649894	0.937978	0.694066	0.435449	0.783115	3.44994e-10	1.44433	1.09617e-08	0.000653953	2.23131	0.0353133	Atp5b	Genotype effect with no sex effect(real)
1821	ONLI_0234	CSHPOS	AC 18:1	0.0186004	1	0.414161	0.545545	39	6	0.0178006	0.0709219	0.0838796	0.146114	0.110448	0.659961	0.021268	0.976359	0.0269006	1.63497	0.372203	0.325618	0.232623	0.93942	1.39639	1.65487	1.0759	0.306404	-0.30689	0.413683	0.0138298	-1.61624	0.0736343	Atp5b	Genotype effect with no sex effect(real)
1841	ONLI_0236	CSHPOS	CE (16:1)	0.00828236	1	0.975198	0.997314	36	5	0.013847	1.80317e-05	0.0116823	0.123268	5.40265e-05	0.59673	0.17493	-0.638022	0.00669	-1.31414	0.404706	0.528759	0.141358	0.94265	0.782041	0.386701	1.1905	0.001582	0.845214	0.00389568	0.0590877	2.68811	0.145503	Atp5b	One sex_Female only
1891	ONLI_0241	CSHPOS	TAG 48:2; TAG 14:0-16:0-18:2;	2.292e-05	1	0.704657	0.996297	38	6	0.326417	2.03793e-06	0.0459761	0.542925	7.01261e-06	0.635599	0.505291	-0.291027	0.0348433	-0.957669	0.533254	0.320517	0.237811	0.94265	0.975903	0.450873	1.12286	8.95009e-05	1.04686	0.000287864	0.0321408	2.32505	0.103799	Atp5b	Interaction_One sex_Female only2
2022	ONLI_0256	CSHPOS	TAG 58:4; TAG 18:1-18:2-22:1;	0.00335114	1	0.785258	0.794982	37	6	0.0137019	3.75374e-11	0.258474	0.123268	3.99722e-10	0.696237	0.154046	-0.617764	0.0147197	-0.917284	0.368338	-0.356903	0.172476	0.93942	0.71938	0.367568	0.797039	8.63568e-09	1.43042	7.56101e-08	0.0199671	1.9908	0.0843392	Atp5b	Genotype effect with no sex effect(real)
204	ONLI_0258	CSHPOS	SMd41:2 A	0.208168	1	0.841037	0.982052	40	6	0.0394447	6.91448e-06	0.613681	0.201908	2.19702e-05	0.876051	0.110843	0.685872	0.282962	0.521839	0.0954514	0.849905	0.553286	0.705269	1.14567	1.10295	1.17955	8.92471e-05	1.11361	0.000287864	0.0147294	1.44167	0.0752931	Atp5b	Genotype effect with no sex effect(real)
206	ONLI_0260	CSHPOS	TAG 60:3; TAG 18:2-20:1-22:0;	3.0522e-07	1	0.911619	0.963512	34	6	0.0128556	0.000544549	0.404304	0.12205	0.00122953	0.789819	0.0226405	-0.972769	0.021268	-1.18464	0.26698	-0.612598	0.215914	0.931915	0.408345	0.363718	0.469174	0.00728589	0.84034	0.0150295	0.0266941	1.41239	0.0947519	Atp5b	Genotype effect with no sex effect(real)
2071	ONLI_0261	CSHPOS	TAG 58:6; TAG 18:1-20:1-20:4;	0.000336041	1	0.77957	0.983025	38	6	0.0403823	1.57306e-05	0.414705	0.204164	4.74933e-05	0.798992	0.110212	-0.688996	0.0430349	-0.955627	0.426742	-0.422365	0.247529	0.94265	0.666887	0.666478	0.667095	0.000156188	1.06562	0.000468367	0.0651872	1.59888	0.155189	Atp5b	Genotype effect with no sex effect(real)
208	ONLI_0262	CSHPOS	TAG 55:3; TAG 15:0-19:0-21:3;	0.00198981	1	0.951363	1	40	6	0.0476097	3.62278e-08	0.394902	0.214737	1.76219e-07	0.789819	0.170427	-0.59193	0.0483307	-0.839784	0.459452	-0.344076	0.257129	0.94265	0.666108	0.50679	0.731924	9.40315e-07	1.28291	4.66018e-06	0.0335976	1.77862	0.10675	Atp5b	Genotype effect with no sex effect(real)
2091	ONLI_0263	CSHPOS	PC34:2	0.0315762	1	0.842559	0.684436	40	6	0.0363816	2.43813e-11	0.187381	0.193707	2.70598e-10	0.665819	0.203369	-0.550079	0.0194347	-0.885246	0.591481	-0.214913	0.209789	0.94265	0.930955	0.823194	1.00225	1.17273e-08	1.41203	9.83098e-08	0.00425629	2.08237	0.0504667	Atp5b	Genotype effect with no sex effect(real)
210	ONLI_0264	CSHPOS	TAG 60:12; TAG 18:2-20:4-22:6;	0.15664	1	0.741558	0.975918	40	6	0.029637	0.0002199	0.00805335	0.184436	0.000541505	0.59673	0.912273	-0.0480848	0.0631492	0.925269	0.0874892	-1.02144	0.282345	0.688108	1.05461	1.38563	0.625972	0.0295981	-0.596271	0.0541953	0.0295778	-2.54298	0.0991801	Atp5b	cannot classify
2141	ONLI_0268	CSHPOS	TAG 58:2; TAG 18:0-18:2-22:0;	2.05682e-05	1	0.955947	0.944793	36	6	0.0300776	0.000244721	0.465485	0.184436	0.000593354	0.809718	0.0753466	-0.766584	0.0581454	-1.01654	0.324659	-0.516627	0.274363	0.93942	0.523952	0.297509	0.625568	0.00198352	0.941193	0.00479453	0.025594	1.44111	0.0942432	Atp5b	Genotype effect with no sex effect(real)
2152	ONLI_0269	CSHPOS	TAG 46:0; TAG 14:0-16:0-16:0;	0.252846	1	0.929537	0.814107	36	6	0.378816	0.0211406	0.0226497	0.592832	0.0371848	0.615397	0.393367	-0.373602	0.032394	-1.08645	0.60618	0.33925	0.236356	0.94265	0.907848	0.659563	1.11362	0.145825	0.463222	0.223126	0.0227349	1.88892	0.0869665	Atp5b	Interaction_One sex_Female only2
220	ONLI_0274	CSHPOS	PE 38:7e; PE 16:1e/22:6; [M+H]+	0.0301743	1	0.275553	0.71946	40	6	0.0234813	1.49556e-11	0.939466	0.171855	1.84141e-10	0.977938	0.187003	-0.570212	0.115349	-0.588794	0.146463	-0.551629	0.3443	0.838537	0.875845	0.876324	0.875532	4.6712e-10	1.53235	1.22697e-08	0.0316179	1.56952	0.102954	Atp5b	Genotype effect with no sex effect(real)
2231	ONLI_0277	CSHPOS	PC38:3	0.00766358	1	0.568419	0.864095	38	6	0.0607533	2.58932e-06	0.0291689	0.234386	8.79476e-06	0.615397	0.437995	0.338495	0.404843	-0.394443	0.0436867	1.01922	0.676344	0.564346	1.19911	0.88458	1.40255	0.000198883	0.992099	0.000584775	0.0285792	2.40576	0.0966541	Atp5b	Interaction_One sex_Male only2
2241	ONLI_0278	CSHPOS	TAG 58:5; TAG 18:1-18:2-22:2;	1.62657e-05	1	0.180213	0.902516	38	6	0.0344692	2.70199e-10	0.544802	0.189942	2.00865e-09	0.849178	0.168134	-0.596842	0.0530836	-0.714091	0.332985	-0.403415	0.262972	0.93942	0.596803	0.600384	0.621394	6.62249e-09	1.44738	6.36405e-08	0.0482946	1.75805	0.127705	Atp5b	Genotype effect with no sex effect(real)
2271	ONLI_0282	CSHPOS	PC38:2	9.40243e-06	1	0.182824	0.182824	40	6	0.0376481	7.41994e-13	0.150456	0.196468	8.11474e-11	0.662161	0.240339	-0.508451	0.0152463	-0.848123	0.651838	-0.168779	0.172476	0.946271	0.9507	0.786924	0.987113	2.01347e-10	1.47726	1.09617e-08	0.0174258	2.15661	0.0780199	Atp5b	Genotype effect with no sex effect(real)
229	ONLI_0284	CSHPOS	TAG 58:4; TAG 18:2-18:2-22:0;	0.00196002	1	0.454848	0.976982	40	6	0.0312542	1.91078e-10	0.452193	0.184436	1.5209e-09	0.806768	0.184197	-0.573789	0.0457247	-0.768437	0.355448	-0.379141	0.253127	0.93942	0.682654	0.377615	0.766259	8.3951e-09	1.4335	7.51743e-08	0.0223964	1.8228	0.0863334	Atp5b	Genotype effect with no sex effect(real)
244	ONLI_0300	CSHPOS	PC37:2	0.000535741	1	0.182824	0.182824	40	6	0.0222302	3.19235e-12	0.951877	0.168437	8.11474e-11	0.983561	0.197991	-0.556565	0.137448	-0.54229	0.116805	-0.570839	0.375221	0.728765	0.763065	0.782799	0.756117	3.53497e-10	1.5696	1.09617e-08	0.000451447	1.54105	0.0338817	Atp5b	Genotype effect with no sex effect(real)
246	ONLI_0302	CSHPOS	SMd38:2	0.0727806	1	0.652404	0.997708	39	6	0.0374863	1.26542e-09	0.64957	0.196468	8.01582e-09	0.877295	0.17128	0.591643	0.264949	0.451492	0.0980816	0.695546	0.529899	0.709067	1.20742	1.13392	1.24218	6.05004e-08	1.41366	4.14559e-07	0.0164439	1.65771	0.0752931	Atp5b	Genotype effect with no sex effect(real)
2511	ONLI_0308	CSHPOS	CE (20:3)	6.76066e-06	1	0.876958	0.982101	37	6	0.207227	0.000447199	0.0492411	0.424363	0.00103341	0.651065	0.301153	-0.450781	0.0244178	-1.1615	0.671727	0.239448	0.232623	0.946271	0.828876	0.569234	0.977517	0.0103103	0.758238	0.0205685	0.0141933	2.15919	0.0750623	Atp5b	Interaction_One sex_Female only2
2541	ONLI_0312	CSHPOS	TAG 48:4; TAG 12:0-18:2-18:2;	0.000439593	1	0.985266	0.97653	39	6	0.0460975	4.74282e-06	0.14257	0.214737	1.538e-05	0.662161	0.113691	-0.68155	0.0138804	-1.14222	0.709415	-0.19468	0.168824	0.946271	0.661137	0.412575	0.787843	0.000218305	1.02172	0.000637126	0.015832	1.96926	0.0752931	Atp5b	Genotype effect with no sex effect(real)
255	ONLI_0313	CSHPOS	PE 18:1-18:1;	0.0246331	1	0.494728	0.957784	40	6	0.0124396	2.34602e-10	0.187579	0.119542	1.81241e-09	0.665819	0.109164	-0.689024	0.00726092	-1.03675	0.427215	-0.341297	0.141358	0.94265	0.724543	0.53583	0.814696	7.98219e-08	1.34596	5.24164e-07	0.0039988	2.04142	0.0504667	Atp5b	Genotype effect with no sex effect(real)
256	ONLI_0314	CSHPOS	CE (18:2)	0.00264806	1	0.984932	0.803843	36	6	0.0477241	4.54564e-05	0.220033	0.214737	0.000126125	0.696237	0.128366	-0.65897	0.0373643	-1.09867	0.592646	-0.272445	0.237811	0.94265	0.867512	0.802251	0.908963	0.00113994	0.957176	0.00289764	0.0346007	1.7834	0.108111	Atp5b	Genotype effect with no sex effect(real)
258	ONLI_0316	CSHPOS	SMd36:2	0.163993	1	0.998024	0.726699	38	6	0.021884	1.51342e-09	0.229755	0.168437	9.39035e-09	0.696237	0.114337	0.681362	0.0203679	0.971318	0.441252	0.321707	0.215914	0.94265	1.15263	1.2109	1.04963	4.28224e-07	-1.32429	2.34334e-06	0.00360066	-1.9739	0.0504667	Atp5b	Genotype effect with no sex effect(real)
2661	ONLI_0324	CSHPOS	PE 36:5e; PE 16:0e/20:5;	0.0348713	1	0.599718	0.960335	39	6	0.00216607	0.000225819	0.159988	0.044023	0.000552625	0.662161	0.0101668	-1.08138	0.000629153	-1.56133	0.294697	-0.621715	0.0649894	0.93942	0.829146	0.744772	0.899898	0.00447054	0.790758	0.00975842	0.0132036	1.73037	0.0727582	Atp5b	Genotype effect with no sex effect(real)
2681	ONLI_0326	CSHPOS	TAG 44:1; TAG 12:0-16:0-16:1;	0.269132	1	0.984969	0.997362	24	6	0.000922686	0.00250408	0.639236	0.0279645	0.0050466	0.877295	0.00424358	-1.21232	0.00886969	-1.33086	0.0753114	-1.02826	0.141358	0.637342	0.67209	0.55191	0.780211	0.0189968	0.786363	0.036511	0.15206	1.08896	0.271094	Atp5b	Genotype effect with no sex effect(real)
2702	ONLI_0328	CSHPOS	TAG 54:5; TAG 18:0-18:2-18:3;	0.344731	1	0.995689	0.952763	39	6	0.0394592	0.0258657	0.0169169	0.201908	0.044796	0.597862	0.045338	-0.854868	0.04911	-1.09652	0.306943	-0.627808	0.257129	0.93942	0.653955	0.567448	0.71551	0.0552238	0.569112	0.0948069	0.266636	1.03782	0.408773	Atp5b	One sex_Female only
275	ONLI_0333	CSHPOS	TAG 56:1; TAG 16:0-18:1-22:0;	2.09944e-06	1	0.975143	0.698949	35	6	0.0479208	6.43827e-06	0.557706	0.214737	2.06234e-05	0.851726	0.127914	-0.660873	0.0971327	-0.830282	0.339015	-0.458593	0.318526	0.93942	0.533185	0.354122	0.606829	0.000122859	1.15045	0.000378176	0.0154059	1.52214	0.0752931	Atp5b	Genotype effect with no sex effect(real)
2781	ONLI_0336	CSHPOS	SMd32:2	0.290938	1	0.990933	0.989123	23	6	1.87158e-05	0.00693449	0.944197	0.00245801	0.013104	0.981567	0.000105586	-1.5507	0.00483375	-1.49696	0.00624904	-1.45604	0.140048	0.246212	0.790325	0.804773	0.793831	0.0359998	0.682588	0.0640358	0.149762	0.723508	0.270051	Atp5b	Genotype effect with no sex effect(real)
281	ONLI_0339	CSHPOS	PCp-40:7 or PC o-40:8	0.236859	1	0.970437	0.996579	37	6	0.0481019	7.98022e-06	0.29908	0.214737	2.52547e-05	0.731944	0.152825	0.619556	0.0216462	1.0102	0.548789	0.330135	0.215914	0.94265	1.19805	1.38846	1.10874	3.53374e-05	1.24843	0.000122669	0.264599	0.568361	0.408215	Atp5b	Genotype effect with no sex effect(real)
2821	ONLI_0340	CSHPOS	TAG 54:6; TAG 18:1-18:2-18:3;	3.70918e-05	1	0.564696	0.831997	38	6	0.0349777	0.00135902	0.427639	0.190828	0.00291007	0.804246	0.0616244	-0.801704	0.0283181	-1.06529	0.41233	-0.496181	0.232623	0.94265	0.531315	0.448495	0.585375	0.00715806	0.796766	0.0148827	0.101613	1.36588	0.207438	Atp5b	Genotype effect with no sex effect(real)
2881	ONLI_0346	CSHPOS	PC 32:1; PC 16:0-16:1;	3.6315e-05	1	0.544794	0.956416	38	6	0.517039	1.28844e-10	0.049809	0.706112	1.0576e-09	0.651065	0.628365	0.211718	0.402313	-0.332615	0.0730539	0.683839	0.674516	0.637342	1.33791	0.829969	1.47788	2.01704e-08	1.37202	1.57369e-07	0.0159173	2.38847	0.0752931	Atp5b	Interaction_cannot classify2
2931	ONLI_0351	CSHPOS	PC37:4	0.971122	1	0.846138	0.363667	40	6	0.504384	0.0632556	0.039193	0.698514	0.0998906	0.622641	0.531818	0.27229	0.0830246	1.0923	0.329526	-0.54772	0.309503	0.93942	1.04035	1.17923	0.916404	0.019327	0.735154	0.0370552	0.174814	-0.904866	0.299464	Atp5b	Interaction_cannot classify2
294	ONLI_0352	CSHPOS	TAG 56:8; TAG 16:0-18:2-22:6;	0.00843689	1	0.99351	0.909831	38	6	0.0488895	0.00132846	0.904206	0.215223	0.00286753	0.969349	0.0802103	-0.752371	0.160111	-0.773194	0.22118	-0.686029	0.401807	0.93081	0.745698	0.781986	0.732725	0.00299673	0.86486	0.00690475	0.343277	0.952025	0.493806	Atp5b	Genotype effect with no sex effect(real)
296	ONLI_0354	CSHPOS	Heptadecasphing-4-enine	0.00466658	1	0.65327	0.997445	37	6	0.000847412	0.748416	0.104846	0.0279645	0.795886	0.659961	0.00119981	-1.33401	0.00937209	-1.92767	0.0476985	-0.733603	0.141358	0.578253	0.885756	0.82951	0.945395	0.397035	-0.249869	0.505434	0.150636	0.944201	0.271008	Atp5b	Genotype effect with no sex effect(real)
297	ONLI_0355	CSHPOS	AC 20:4;	0.00114169	1	0.417662	0.656116	39	6	0.0413929	0.00046535	0.452493	0.204754	0.00106674	0.806768	0.0908344	0.727082	0.118037	1.00357	0.248373	0.473156	0.348363	0.931915	1.34437	1.47168	1.162	0.00337974	-0.879915	0.00765298	0.00911832	-1.41033	0.0668242	Atp5b	Genotype effect with no sex effect(real)
299	ONLI_0358	CSHPOS	PCo-40:4	0.803577	1	0.998338	0.999018	39	6	0.0122819	6.4575e-05	0.487604	0.119542	0.000173079	0.826306	0.0368315	0.889833	0.0370867	1.11179	0.210819	0.643676	0.237811	0.93081	1.15258	1.17345	1.12181	0.00101231	-0.943992	0.00259473	0.0362285	-1.4121	0.10938	Atp5b	Genotype effect with no sex effect(real)
3021	ONLI_0361	CSHPOS	TAG 58:3; TAG 18:1-18:2-22:0;	4.67894e-06	1	0.98576	0.999999	39	6	0.00971771	4.40568e-08	0.307935	0.108054	2.04216e-07	0.731944	0.0613473	-0.801469	0.0112638	-1.08219	0.30255	-0.489518	0.155937	0.93942	0.524038	0.320168	0.599721	4.07214e-06	1.21804	1.67127e-05	0.0154614	1.81071	0.0752931	Atp5b	Genotype effect with no sex effect(real)
3161	ONLI_0376	CSHPOS	CE ( 22:1)	5.11539e-06	1	0.997258	0.753175	36	6	0.00314925	0.395351	0.727653	0.059086	0.486776	0.906066	0.00418354	-1.19665	0.046578	-1.32192	0.0460825	-1.0566	0.253127	0.576397	0.637584	0.588731	0.703345	0.40238	-0.265996	0.509768	0.998902	-0.000673151	0.998943	Atp5b	Genotype effect with no sex effect(real)
317	ONLI_0378	CSHPOS	PE 36:4; PE 18:2-18:2;	0.000711935	1	0.487891	0.999895	40	6	0.00368647	6.17876e-10	0.215685	0.0631508	4.2338e-09	0.696237	0.0560018	-0.816893	0.00219098	-1.1466	0.285401	-0.487183	0.0974307	0.93942	0.592941	0.360741	0.679383	1.48774e-07	1.31133	8.94913e-07	0.00719771	1.97075	0.0623274	Atp5b	Genotype effect with no sex effect(real)
320	ONLI_0381	CSHPOS	SMd41:1	0.526798	1	0.940584	0.94626	39	6	0.0483107	6.39491e-07	0.708138	0.214737	2.41109e-06	0.90002	0.15997	0.607309	0.122003	0.738707	0.278414	0.507564	0.352542	0.937473	1.10739	1.14399	1.06868	1.44748e-05	-1.23443	5.28061e-05	0.00153045	-1.46557	0.0419099	Atp5b	Genotype effect with no sex effect(real)
3211	ONLI_0382	CSHPOS	PC 40:7e; PC 18:1e/22:6;	0.338985	1	0.655246	0.605398	40	6	0.0339975	0.00288224	0.0155264	0.189012	0.00571237	0.59673	0.384419	0.377997	0.0600854	1.30399	0.19935	-0.547992	0.280162	0.93081	1.08145	1.24204	0.906232	0.149389	-0.422347	0.227255	0.0122805	-2.27433	0.0717263	Atp5b	cannot classify
3221	ONLI_0383	CSHPOS	TAG 47:2; TAG 14:0-16:1-17:1;	1.46213e-05	1	0.833019	0.996686	23	6	0.0432629	0.00211068	0.140524	0.210439	0.00438843	0.662161	0.0267605	-0.9692	0.00282976	-1.29303	0.610193	-0.282082	0.10055	0.94265	0.476894	0.448748	0.600653	0.0619922	0.759593	0.105507	0.010298	1.77055	0.0689166	Atp5b	Genotype effect with no sex effect(real)
334	ONLI_0395	CSHPOS	SM d40:3; SM d15:3/25:0;	0.00104805	1	0.462083	0.462083	38	6	0.00668012	2.28028e-12	0.599917	0.0863835	8.11474e-11	0.867403	0.121562	0.668479	0.02921	0.792191	0.14685	0.544767	0.232623	0.838537	1.27299	1.35667	1.23636	2.54341e-10	1.57777	1.09617e-08	0.0448523	1.33034	0.121875	Atp5b	Genotype effect with no sex effect(real)
339	ONLI_0400	CSHPOS	TAG 58:8; TAG 18:1-18:1-22:6;	0.00137128	1	0.944059	0.99746	40	6	0.045337	0.364822	0.148096	0.213926	0.459383	0.662161	0.0515934	-0.831417	0.0791165	-1.09894	0.35009	-0.563894	0.308653	0.93942	0.73652	0.72919	0.743366	0.531531	0.188153	0.635578	0.462272	0.723199	0.61325	Atp5b	Genotype effect with no sex effect(real)
340	ONLI_0401	CSHPOS	PCp-38:2 or PC o-38:3	0.00181304	1	0.791329	0.994079	40	6	0.0159017	8.92681e-06	0.502314	0.134737	2.7914e-05	0.835236	0.0613324	0.80051	0.228618	0.585312	0.0444918	1.01571	0.489541	0.565476	1.27067	1.1326	1.36165	9.60729e-05	1.08902	0.000305264	0.0157977	1.51942	0.0752931	Atp5b	Genotype effect with no sex effect(real)
3431	ONLI_0404	CSHPOS	LPC p-18:0	0.556341	1	0.994484	0.985934	38	6	8.25681e-05	0.00338462	0.772191	0.00722929	0.00661806	0.929348	0.000502576	1.41921	0.00277326	1.535	0.019978	1.34195	0.10055	0.425736	1.19191	1.21565	1.17662	0.00812575	0.73213	0.0165883	0.406145	0.539076	0.559015	Atp5b	Genotype effect with no sex effect(real)
349	ONLI_0410	CSHPOS	N-Nervonoyl-D-erythro-sphingosylphosphorylcholine	0.265993	1	0.934721	0.554715	39	6	0.0499312	0.0625306	0.0521389	0.216882	0.098944	0.651065	0.0567202	0.81562	0.13075	0.96332	0.239222	0.653445	0.364452	0.931915	1.20683	1.25333	1.16233	0.0737773	0.564544	0.122651	0.653455	0.254669	0.775486	Atp5b	Genotype effect with no sex effect(real)
351	ONLI_0412	CSHPOS	TAG 56:3; TAG 14:0-20:0-22:3;	0.000707257	1	0.544615	0.907395	40	6	0.0278175	1.68313e-11	0.257529	0.184203	1.95045e-10	0.696237	0.183875	-0.574202	0.0216334	-0.860009	0.47215	-0.288395	0.215914	0.94265	0.744148	0.531445	0.804342	3.71355e-09	1.42951	3.95443e-08	0.0193643	2.00112	0.0838408	Atp5b	Genotype effect with no sex effect(real)
3531	ONLI_0414	CSHPOS	PCp-42:3 or PC o-42:4	0.000550212	1	0.603797	0.92958	40	6	0.0104654	0.0711023	0.0248902	0.111443	0.11051	0.615397	0.0498723	0.83736	0.00224114	1.72151	0.941668	-0.0467913	0.0974307	0.985419	1.33306	1.74331	0.972936	0.215925	0.368796	0.309362	0.102872	-1.39951	0.207652	Atp5b	One sex_Female only
3591	ONLI_0420	CSHPOS	Lyso-PC o-18	0.90307	1	0.808228	0.844483	40	6	0.0147209	0.0341652	0.0104624	0.127473	0.0576492	0.59673	0.017683	1.00276	0.209145	0.854412	0.0137469	1.15111	0.474633	0.386877	1.12791	1.12636	1.12934	0.0587663	0.552414	0.100233	0.317354	0.849117	0.466558	Atp5b	One sex_Male only
3651	ONLI_0426	CSHPOS	DAG 38:6; DAG 18:2-20:4;	0.0124404	1	0.898824	0.954946	38	6	0.0284386	9.69795e-07	0.0108308	0.184436	3.52528e-06	0.59673	0.49847	-0.295681	0.197756	0.558664	0.0397912	-1.07551	0.463785	0.540612	0.878062	1.10522	0.741981	8.36301e-07	1.41579	4.22439e-06	0.745864	-0.218381	0.853034	Atp5b	One sex_Male only
3661	ONLI_0427	CSHPOS	LPC 20:3 b	0.026002	1	0.645871	0.697931	39	6	0.0561674	9.8096e-05	0.0275271	0.225816	0.000255959	0.615397	0.410483	0.358431	0.364312	-0.429234	0.0551993	1.12623	0.643672	0.6147	1.20334	0.876872	1.44196	0.00608971	0.774711	0.0127625	0.0161224	2.33018	0.0752931	Atp5b	Interaction_cannot classify2
373	ONLI_0435	CSHPOS	PE36:2	0.00340116	1	0.499894	0.943438	40	6	0.00431581	1.06186e-10	0.0942598	0.0675659	8.90156e-10	0.659961	0.0702319	-0.775534	0.00119339	-1.20372	0.415562	-0.347351	0.0709452	0.94265	0.674045	0.456364	0.769952	5.54043e-08	1.33011	3.85696e-07	0.00128813	2.18647	0.0406017	Atp5b	Genotype effect with no sex effect(real)
3811	ONLI_0443	CSHPOS	PE 34:0; PE 17:0-17:0;	0.81394	1	0.907208	0.885023	39	6	0.0414313	0.467507	0.148121	0.204754	0.558175	0.662161	0.0474912	-0.846874	0.3577	-0.52258	0.0776457	-1.16374	0.63341	0.637342	0.950425	0.967345	0.934304	0.363269	0.289864	0.473151	0.553141	-0.351292	0.69685	Atp5b	Genotype effect with no sex effect(real)
386	ONLI_0449	CSHPOS	SMd39:1	8.57566e-05	1	0.182824	0.182824	40	6	0.0033232	3.19235e-12	0.287456	0.0597018	8.11474e-11	0.712313	0.10246	0.701989	0.210212	0.460972	0.00594459	0.943007	0.474633	0.246212	1.17161	1.1082	1.19817	3.03646e-10	1.503	1.09617e-08	0.000154751	1.98503	0.0338817	Atp5b	Genotype effect with no sex effect(real)
3951	ONLI_0458	CSHPOS	TAG 60:11; TAG 18:2-20:4-22:5;	0.209613	1	0.98216	0.974087	39	6	0.0679239	0.000340688	0.0204949	0.248949	0.000806194	0.615397	0.953652	-0.0254119	0.114606	0.815878	0.127139	-0.883658	0.343382	0.764775	1.01682	1.24081	0.743528	0.018156	-0.661293	0.035066	0.0417636	-2.36083	0.117535	Atp5b	Interaction_cannot classify2
3961	ONLI_0471	CSHNEG	FA 11:0	0.978222	1	0.952429	0.914555	39	6	1.33099e-05	0.997141	0.165816	0.00209764	0.998408	0.662161	2.30321e-05	-1.67165	0.00144051	-2.1452	0.00762814	-1.20131	0.0709452	0.279012	0.524463	0.381202	0.674566	0.645665	-0.125086	0.739512	0.0233807	0.818809	0.0877334	Atp5b	Genotype effect with no sex effect(real)
3981	ONLI_0474	CSHNEG	FA 14:1	0.338641	1	0.99478	0.999196	40	6	0.0175269	0.815619	0.24827	0.145381	0.847899	0.696237	0.0208757	0.978167	0.0384894	1.4355	0.313941	0.520835	0.237811	0.93942	1.52173	1.7357	1.31308	0.856749	0.05662	0.896572	0.0120947	-0.858044	0.0717263	Atp5b	Genotype effect with no sex effect(real)
4002	ONLI_0476	CSHNEG	FA 15:0	0.710869	1	0.990136	0.805497	38	6	0.00115482	0.879452	0.555009	0.031091	0.899133	0.85166	0.00159603	1.30356	0.0303518	1.52577	0.0229067	1.08135	0.236237	0.43905	1.38259	1.45911	1.30561	0.943031	0.0213336	0.96133	0.516575	-0.423092	0.660814	Atp5b	Genotype effect with no sex effect(real)
401	ONLI_0477	CSHNEG	FA 16:1	0.0167952	1	0.759665	0.981518	40	5	0.0273526	0.0375823	0.028253	0.18266	0.0628766	0.615397	0.0319952	0.987333	0.166874	0.913886	0.130603	0.945212	0.417451	0.779659	1.63608	1.56819	1.59557	0.0761174	0.546518	0.126275	0.179314	0.577844	0.301277	Atp5b	cannot classify
407	ONLI_0484	CSHNEG	FA 20:4	0.0258149	1	0.999284	0.969615	38	6	0.00142445	0.000157784	0.163002	0.0340142	0.000395967	0.662161	0.0063582	1.14349	0.00234922	1.57856	0.201382	0.665878	0.0974307	0.93081	1.41139	1.58435	1.18062	0.00391395	-0.808429	0.00868787	0.0027495	-1.72111	0.0471002	Atp5b	Genotype effect with no sex effect(real)
4081	ONLI_0485	CSHNEG	FA 20:3 a	0.674283	1	0.952551	0.989116	37	6	0.000905352	0.20241	0.45443	0.0279645	0.2828	0.806768	0.00127728	1.32755	0.00126462	1.61832	0.101548	1.0697	0.0709452	0.721992	1.46688	1.59011	1.36997	0.18268	0.405853	0.271607	0.740219	-0.142765	0.849043	Atp5b	Genotype effect with no sex effect(real)
413	ONLI_0491	CSHNEG	FA 22:6	0.106351	1	0.455559	0.973838	39	6	0.0416804	0.0117992	0.139624	0.204754	0.0213743	0.662161	0.047763	0.845887	0.0482798	1.39114	0.491539	0.287201	0.257129	0.94265	1.41226	1.64376	1.10941	0.0842957	-0.523847	0.136677	0.00397088	-1.62779	0.0504667	Atp5b	Genotype effect with no sex effect(real)
4351	ONLI_0531	CSHNEG	LPC 22:5 a	0.00152383	1	0.303559	0.661808	35	6	0.0236717	1.02271e-06	0.0121421	0.171855	3.68865e-06	0.59673	0.482787	0.308284	0.296388	-0.43985	0.028601	1.14157	0.564139	0.450752	1.19253	1.03405	1.32851	0.000130131	0.99343	0.000397454	0.0372262	2.57485	0.109831	Atp5b	One sex_Male only
441	ONLI_0541	CSHNEG	Cer-NDS d41:0; Cer-NDS d18:0/23:0;	0.0122465	1	0.96716	0.996877	40	6	0.0312241	0.186484	0.13189	0.184436	0.262879	0.662161	0.0361693	-0.891811	0.00726707	-1.48118	0.639777	-0.302438	0.141358	0.94265	0.563727	0.39637	0.71106	0.505697	0.20199	0.613356	0.0500362	1.38074	0.130992	Atp5b	Genotype effect with no sex effect(real)
445	ONLI_0546	CSHNEG	PE 34:3; PE 16:0-18:3;	0.000262536	1	0.601443	0.896685	39	6	0.0446388	7.12612e-11	0.678299	0.2119	6.38112e-10	0.884933	0.212707	-0.539914	0.0991152	-0.62591	0.294186	-0.415865	0.321411	0.93942	0.612212	0.348709	0.689285	8.52297e-09	1.48407	7.54618e-08	0.0034278	1.69412	0.0504667	Atp5b	Genotype effect with no sex effect(real)
4462	ONLI_0547	CSHNEG	PE 34:1; PE 16:0-18:1;	0.000380694	1	0.548245	0.660611	40	6	0.0123158	2.42615e-12	0.0907463	0.119542	8.11474e-11	0.659961	0.14447	-0.629248	0.00324217	-1.03379	0.562753	-0.22471	0.102193	0.94265	0.774771	0.523064	0.86319	1.54662e-09	1.42721	2.34373e-08	0.00446684	2.23629	0.0504667	Atp5b	Genotype effect with no sex effect(real)
4471	ONLI_0548	CSHNEG	PE 36:6e; PE 16:1e/20:5;	0.000603618	1	0.932355	1	35	6	0.00668705	3.95934e-08	0.00533575	0.0863835	1.87949e-07	0.59673	0.269485	-0.482772	0.00112051	-1.27829	0.480977	0.343395	0.0709452	0.94265	0.952511	0.574267	1.15708	4.17418e-05	1.0726	0.000143636	0.00423692	2.69429	0.0504667	Atp5b	One sex_Female only
449	ONLI_0550	CSHNEG	PE 36:4e; PE 18:2e/18:2;	0.00266	1	0.889678	0.998507	37	6	0.0418343	5.4786e-08	0.66687	0.204754	2.50996e-07	0.884135	0.153378	-0.618742	0.0940901	-0.724619	0.29191	-0.477019	0.315502	0.93942	0.787506	0.774522	0.804039	1.31795e-06	1.3263	6.14522e-06	0.0360935	1.5739	0.10938	Atp5b	Genotype effect with no sex effect(real)
455	ONLI_0557	CSHNEG	PE 36:3	0.0014167	1	0.275553	0.71946	40	6	0.0029563	7.98349e-13	0.0721821	0.0568187	8.11474e-11	0.659961	0.0874575	-0.733565	0.000636469	-1.14887	0.410263	-0.318262	0.0649894	0.94265	0.771749	0.499377	0.861893	7.95402e-10	1.42886	1.60712e-08	0.00197366	2.25946	0.0423643	Atp5b	Genotype effect with no sex effect(real)
456	ONLI_0559	CSHNEG	PE 36:2; PE 18:0-18:2;	0.015455	1	0.424109	0.96281	40	6	0.00642345	3.08665e-10	0.152655	0.0863835	2.27316e-09	0.662161	0.0778987	-0.755956	0.00302621	-1.13257	0.385067	-0.379339	0.10055	0.93942	0.656679	0.46981	0.741576	1.04315e-07	1.3235	6.62904e-07	0.00374163	2.07673	0.0504667	Atp5b	Genotype effect with no sex effect(real)
457	ONLI_0560	CSHNEG	PE 36:1; PE 18:0-18:1;	0.0124923	1	0.693338	0.996545	40	6	0.0374761	2.01159e-09	0.281688	0.196468	1.22879e-08	0.706911	0.165725	-0.598366	0.0277753	-0.89883	0.504522	-0.297902	0.232623	0.94265	0.745184	0.600947	0.814377	3.53108e-07	1.31857	1.9458e-06	0.00930267	1.91949	0.0668242	Atp5b	Genotype effect with no sex effect(real)
458	ONLI_0562	CSHNEG	PE 38:7e; PE 16:1e/22:6; [M-H]-	0.00189844	1	0.442131	0.999229	39	6	0.00445866	5.54296e-11	0.27125	0.0675659	5.26247e-10	0.696237	0.0712262	-0.773895	0.0048771	-1.03334	0.254093	-0.478824	0.140048	0.931915	0.832697	0.80507	0.85783	2.57127e-08	1.38939	1.98644e-07	0.0034054	1.9439	0.0504667	Atp5b	Genotype effect with no sex effect(real)
460	ONLI_0564	CSHNEG	PE 38:6e; PE 18:1e/20:5;	0.957877	1	0.999954	0.971164	36	6	0.0268483	1.02515e-06	0.266996	0.18266	3.68865e-06	0.696237	0.138178	-0.642977	0.0308332	-1.0509	0.443041	-0.362396	0.236237	0.94265	0.864919	0.746779	0.937702	2.36644e-05	1.14604	8.36212e-05	0.0839169	1.83454	0.181666	Atp5b	Genotype effect with no sex effect(real)
461	ONLI_0565	CSHNEG	PE 38:6e; PE 18:2e/20:4;	0.000162771	1	0.566635	0.88781	40	6	0.00443934	3.60909e-12	0.756367	0.0675659	8.88738e-11	0.924058	0.0923297	-0.722879	0.0331385	-0.798227	0.093214	-0.647532	0.237811	0.705269	0.74114	0.817645	0.704234	1.0283e-09	1.49393	1.79202e-08	0.0157681	1.64462	0.0752931	Atp5b	Genotype effect with no sex effect(real)
467	ONLI_0571	CSHNEG	PE 38:6; PE 16:0-22:6;	0.00333521	1	0.196924	0.191618	39	6	0.000311141	6.5298e-14	0.217572	0.0175128	3.34332e-11	0.696237	0.0434319	-0.862205	0.000610103	-1.10832	0.115427	-0.577894	0.0649894	0.728765	0.724824	0.58341	0.79024	1.09432e-10	1.48967	1.09617e-08	0.00193466	2.0201	0.0423643	Atp5b	Genotype effect with no sex effect(real)
468	ONLI_0572	CSHNEG	PE 38:5; PE 18:1-20:4;	0.0106562	1	0.267605	0.276476	39	6	0.0303761	7.12344e-12	0.676003	0.184436	1.07947e-10	0.884868	0.23787	-0.511871	0.0853662	-0.631489	0.242113	-0.431662	0.309844	0.931915	0.812377	0.605506	0.870713	1.09661e-09	1.53699	1.83857e-08	0.00141717	1.73682	0.0419099	Atp5b	Genotype effect with no sex effect(real)
470	ONLI_0574	CSHNEG	PE 38:4; PE 18:0-20:4;	0.122504	1	0.710399	0.599019	39	6	0.00127344	1.52713e-12	0.149681	0.03237	8.11474e-11	0.662161	0.0561299	-0.817492	0.00093688	-1.13174	0.229159	-0.466519	0.0709452	0.93081	0.722219	0.590429	0.800009	1.62758e-09	1.43238	2.41987e-08	0.0016696	2.0976	0.0419099	Atp5b	Genotype effect with no sex effect(real)
472	ONLI_0576	CSHNEG	SM d35:1; SM d18:1/17:0;	0.538981	1	0.946874	0.933368	39	6	0.0313635	8.06019e-08	0.646403	0.184436	3.4898e-07	0.877295	0.144322	0.630377	0.0791218	0.781368	0.26118	0.512735	0.308653	0.931915	1.0967	1.10643	1.09128	3.48495e-07	-1.30062	1.9339e-06	0.130066	-1.56926	0.242299	Atp5b	Genotype effect with no sex effect(real)
473	ONLI_0577	CSHNEG	PE 40:6e; PE 18:0e/22:6;	0.472592	1	0.998092	0.990314	40	6	0.0193042	0.119696	0.0379037	0.152117	0.176629	0.622641	0.0228853	-0.964268	0.0394216	-1.14624	0.22112	-0.782293	0.237811	0.93081	0.838559	0.805219	0.869577	0.210375	0.391624	0.303619	0.00405378	0.755574	0.0504667	Atp5b	One sex_Female only
4782	ONLI_0582	CSHNEG	HexCer-NS d36:1; HexCer-NS d18:1/18:0;	0.000110068	1	0.50626	0.371629	37	6	0.044191	3.98008e-11	0.173184	0.211498	4.08137e-10	0.662161	0.311708	0.441174	0.649051	0.17828	0.0159991	0.837976	0.846679	0.406686	1.27565	1.11906	4.86489	3.73527e-10	-1.65154	1.09617e-08	0.0600334	-0.991842	0.147372	Atp5b	Genotype effect with no sex effect(real)
4791	ONLI_0583	CSHNEG	SM d36:2	0.0189782	1	0.239212	0.946974	37	6	0.0112521	2.56256e-10	0.265164	0.115151	1.92314e-09	0.696237	0.172267	0.592186	0.334457	0.382217	0.0119279	0.93185	0.609291	0.348117	1.29058	1.11868	1.84944	7.57825e-10	-1.59958	1.57149e-08	0.103299	-1.04995	0.207652	Atp5b	Genotype effect with no sex effect(real)
4801	ONLI_0584	CSHNEG	PE 40:7; PE 18:1-22:6;	0.024575	1	0.182824	0.182824	40	6	0.00685485	2.63445e-13	0.56527	0.0871229	4.15189e-11	0.851726	0.130801	-0.650929	0.0266464	-0.783664	0.156796	-0.518194	0.232623	0.864025	0.732702	0.608576	0.784041	2.61793e-10	1.53125	1.09617e-08	0.00206777	1.79671	0.0428791	Atp5b	Genotype effect with no sex effect(real)
4811	ONLI_0585	CSHNEG	PC 32:2; PC 14:0-18:2;	0.0818411	1	0.275553	0.71946	40	6	0.0883522	1.17118e-11	0.0299377	0.274101	1.56294e-10	0.615397	0.824561	-0.0967332	0.0833272	-0.643528	0.24024	0.450062	0.309503	0.931915	1.04113	0.857175	1.14493	1.17941e-09	1.39456	1.89668e-08	0.0229186	2.48815	0.0870587	Atp5b	Interaction_cannot classify2
482	ONLI_0586	CSHNEG	PE 40:6; PE 18:0-22:6;	0.0423082	1	0.443016	0.429468	39	6	0.0469851	4.51104e-12	0.226376	0.214737	8.93572e-11	0.696237	0.232004	-0.518219	0.0271704	-0.793974	0.595012	-0.204921	0.232623	0.94265	0.830974	0.718853	0.897383	1.70618e-09	1.46416	2.48976e-08	0.01236	2.05321	0.0717263	Atp5b	Genotype effect with no sex effect(real)
488	ONLI_0594	CSHNEG	SM d38:1; SM d16:1/22:0;	0.000739167	1	0.987042	0.688532	37	6	0.008313	0.0108577	0.0289669	0.0977708	0.0197139	0.615397	0.044038	0.862035	0.00712718	1.69187	0.919147	0.0536918	0.141358	0.984624	1.3988	1.91174	1.0398	0.00804165	0.795347	0.0165021	0.338937	-0.842836	0.490961	Atp5b	One sex_Female only
493	ONLI_0600	CSHNEG	PC 34:3	0.00639763	1	0.388052	0.322145	38	6	0.0121901	1.88613e-12	0.206131	0.119542	8.11474e-11	0.688266	0.155856	-0.614142	0.00941689	-0.910221	0.399566	-0.318064	0.141358	0.94265	0.887332	0.787963	0.939335	9.80858e-10	1.47359	1.79202e-08	0.00977767	2.06574	0.067586	Atp5b	Genotype effect with no sex effect(real)
5181	ONLI_0633	CSHNEG	PC 37:4; PC 17:0-20:4;	0.32546	1	0.983781	0.999735	39	6	0.0230517	0.0169871	0.00643997	0.171855	0.0302163	0.59673	0.746852	0.14105	0.0292255	1.24929	0.13412	-0.953364	0.232623	0.794639	1.01647	1.17477	0.871427	0.0674524	0.539079	0.113332	0.16154	-1.66357	0.284137	Atp5b	One sex_Female only
5221	ONLI_0640	CSHNEG	PC 37:2; PC 19:0-18:2;	0.00200577	1	0.182824	0.182824	40	6	0.0334508	3.19235e-12	0.619492	0.189012	8.11474e-11	0.877295	0.229997	-0.519623	0.277495	-0.401418	0.0773538	-0.637827	0.546665	0.637342	0.787655	0.810289	0.778704	2.44355e-10	1.59671	1.09617e-08	0.00170192	1.3603	0.0419099	Atp5b	Genotype effect with no sex effect(real)
529	ONLI_0649	CSHNEG	SM d42:5; SM d14:3/28:2;	0.0543008	1	0.842638	0.683644	28	6	0.000280513	1.64958e-10	0.508268	0.0173581	1.3264e-09	0.836584	0.192587	0.577234	0.00781595	1.08235	0.0180838	0.772042	0.141358	0.425736	1.37237	1.49133	4.50382	1.14322e-07	-1.63316	7.20685e-07	0.012735	-1.94347	0.0717263	Atp5b	Genotype effect with no sex effect(real)
554	ONLI_0677	CSHNEG	PI 39:4; PI 19:0-20:4;	0.00148669	1	0.221749	0.215792	37	6	0.00881439	1.5454e-11	0.909352	0.100663	1.84511e-10	0.969349	0.131209	-0.653168	0.0934429	-0.6056	0.0709846	-0.658374	0.315502	0.637342	0.803524	0.84309	0.801011	3.82624e-10	1.56743	1.09617e-08	0.0260842	1.51465	0.0942858	Atp5b	Genotype effect with no sex effect(real)
559	ONLI_0702	HILICPOS	2R-3-Hydroxyisovaleroylcarnitine	0.983761	1	0.781343	0.973457	40	6	0.043908	0.353315	0.0895587	0.211498	0.44855	0.659961	0.050043	0.836763	0.472677	0.348279	0.0637458	1.32525	0.72184	0.637342	1.20434	1.10957	1.30708	0.200448	-0.391566	0.292322	0.468991	0.585403	0.618002	Atp5b	Genotype effect with no sex effect(real)
561	ONLI_0704	HILICPOS	S-Cotinine N-oxide	5.00839e-10	1	0.623756	0.454594	31	5	0.00702417	0.0782654	0.0186513	0.0878579	0.120444	0.612384	0.0328022	0.992428	0.732471	0.226577	0.000615976	2.12262	0.885079	0.0846178	2.43189	1.14204	4.47501	0.644819	-0.144028	0.739512	0.194664	1.75202	0.32024	Atp5b	One sex_Male only
562	ONLI_0705	HILICPOS	1-Methyl-L-histidine	0.593017	1	0.979532	0.547201	37	5	0.000286365	5.79023e-11	0.5486	0.0173581	5.36788e-10	0.849306	0.0133249	1.13176	0.00867155	1.19167	0.0238538	0.879702	0.141358	0.43905	1.41947	1.70779	1.22167	1.89572e-09	1.47155	2.52739e-08	0.131906	1.15958	0.244549	Atp5b	Genotype effect with no sex effect(real)
5632	ONLI_0706	HILICPOS	2-Indolinone	0.000269962	1	0.999431	0.752867	40	5	0.000413967	5.94588e-08	0.873178	0.0191886	2.69273e-07	0.959644	0.00492867	1.27014	0.011688	1.18793	0.0319008	1.08971	0.158795	0.465515	1.94014	1.74091	1.97224	1.59068e-06	-1.21498	7.24542e-06	0.0717967	-1.31321	0.163514	Atp5b	Genotype effect with no sex effect(real)
5641	ONLI_0707	HILICPOS	3-Hydroxybutyrylcarnitine	0.54664	1	0.809268	0.516238	36	5	0.000200726	3.77926e-05	0.842661	0.0158172	0.000107713	0.952904	0.00160669	1.40938	0.0802845	1.2589	0.000403569	1.39208	0.309248	0.0846178	1.54265	1.50566	1.50331	0.000406087	0.977202	0.00113878	0.0696262	1.11039	0.159958	Atp5b	Genotype effect with no sex effect(real)
565	ONLI_0708	HILICPOS	4-Hydroxynonenal	0.0047497	1	0.951375	0.805648	38	5	0.00104581	0.0718626	0.0022654	0.0305223	0.111472	0.595046	0.00313314	1.32913	0.214503	0.587573	0.00423021	2.3399	0.474798	0.240018	1.44434	1.20566	1.80216	0.158918	-0.40629	0.240359	0.123644	1.34603	0.235341	Atp5b	One sex_Male only
5661	ONLI_0710	HILICPOS	5-Hydroxytryptophol	3.48056e-07	1	0.704556	0.769348	34	5	0.0310674	0.10887	0.0698127	0.184436	0.162173	0.659961	0.036961	0.967661	0.131868	0.894243	0.195482	0.964049	0.364605	0.93081	1.99424	1.89434	1.92967	0.173793	-0.454956	0.260918	0.553589	-0.38515	0.69685	Atp5b	Genotype effect with no sex effect(real)
568	ONLI_0712	HILICPOS	7-Keto-3a,12-a-dihydroxycholanic acid	1.45674e-06	1	0.566586	0.510679	23	6	8.91525e-06	4.58055e-05	0.0255997	0.0017563	0.000126648	0.615397	0.000164988	1.51787	0.000223646	1.83585	0.0253119	0.70811	0.0649894	0.43905	3.5732	5.21142	2.08799	5.27879e-05	1.25674	0.000178527	0.806361	0.129004	0.893688	Atp5b	Different size
5772	ONLI_0733	HILICPOS	Glycerophosphocholine	0.406285	1	0.243027	0.715043	40	6	0.0476963	0.000294508	0.449638	0.214737	0.000711879	0.806768	0.0967133	0.713633	0.365972	0.447768	0.0899431	0.979498	0.643802	0.688108	1.16124	1.07685	1.26928	0.000373151	-1.03484	0.00105015	0.503707	-0.503112	0.649626	Atp5b	Genotype effect with no sex effect(real)
5791	ONLI_0735	HILICPOS	Hexanoyl-L-carnitine	0.0472954	1	0.99825	0.947826	40	6	0.0060145	0.484272	0.45823	0.0831479	0.573844	0.806768	0.00754909	1.11979	0.0361157	1.40745	0.117453	0.832127	0.237811	0.728765	1.55053	1.65352	1.43992	0.720447	-0.108698	0.800723	0.221053	-0.684025	0.351899	Atp5b	Genotype effect with no sex effect(real)
5802	ONLI_0739	HILICPOS	Isovaleryl-L-carnitine	0.264229	1	0.918561	0.786752	39	6	0.0404183	0.0254941	0.0282792	0.204164	0.0442497	0.615397	0.225859	0.524987	0.559756	-0.351166	0.0198749	1.38379	0.787656	0.425736	1.09461	0.916738	1.29278	0.0296423	-0.676768	0.0541953	0.170561	1.05819	0.29604	Atp5b	One sex_Male only
5811	ONLI_0740	HILICPOS	Lauroyl-L-carnitine	0.116519	1	0.900149	0.993464	38	6	0.0254992	0.334829	0.100847	0.176258	0.43112	0.659961	0.0300395	0.923958	0.155086	1.06265	0.0537922	0.798739	0.396778	0.614322	1.32641	1.36006	1.29743	0.426272	-0.255905	0.53238	0.330312	-0.519812	0.482011	Atp5b	Genotype effect with no sex effect(real)
584	ONLI_0745	HILICPOS	Leu-Pro	0.10365	1	0.79873	0.819719	39	6	0.281799	0.293182	0.0415693	0.497332	0.388414	0.629935	0.295555	0.454419	0.0627194	1.28076	0.474998	-0.369927	0.282345	0.94265	1.04375	1.16288	0.922158	0.801061	-0.0778319	0.858824	0.0625239	-1.72852	0.152289	Atp5b	Interaction_cannot classify2
5851	ONLI_0746	HILICPOS	L-Homocitrulline	0.44098	1	0.94395	0.988082	39	6	0.0756949	0.00213879	0.0058117	0.258354	0.00443518	0.59673	0.648451	-0.199098	0.284081	0.633365	0.057653	-1.04515	0.554099	0.615386	0.973002	1.12468	0.79738	0.0715708	-0.529941	0.119234	0.0279699	-2.20845	0.0966541	Atp5b	Interaction_cannot classify2
591	ONLI_0753	HILICPOS	N.alpha.-Methyl-L-lysine	0.531731	1	0.970313	0.958738	39	6	0.039275	0.00713431	0.0195606	0.201908	0.0134173	0.615397	0.986418	0.00744307	0.0824014	1.00887	0.0967832	-1.00054	0.309503	0.706159	1.03695	1.25987	0.800295	0.372722	-0.255707	0.4807	0.0675106	-2.26511	0.15744	Atp5b	cannot classify
5931	ONLI_0756	HILICPOS	N-alpha-Acetyl-L-ornithine	0.910791	1	0.963391	0.968733	39	6	0.0136085	0.030026	0.627525	0.123268	0.051548	0.877295	0.022165	0.970121	0.22297	0.779093	0.0296872	1.14438	0.485849	0.454053	1.19476	1.14126	1.25165	0.0288941	-0.653968	0.0530736	0.714321	-0.288681	0.833241	Atp5b	Genotype effect with no sex effect(real)
604	ONLI_0773	HILICPOS	Stachydrine	0.161555	1	0.995497	0.97799	39	6	0.0485067	0.268885	0.139914	0.214737	0.362635	0.662161	0.055179	-0.82054	0.377039	-0.600485	0.053463	-1.03406	0.65442	0.614322	0.639313	0.75857	0.507617	0.426309	-0.254651	0.53238	0.21019	-0.68823	0.338711	Atp5b	Genotype effect with no sex effect(real)
608	ONLI_0780	HILICPOS	trans-3'-Hydroxycotinine	6.70283e-07	1	0.319022	0.833622	38	5	0.0134316	0.00266451	0.00612648	0.123268	0.00531552	0.59673	0.257665	-0.532734	0.00110228	-1.41222	0.275536	0.891823	0.0709452	0.932234	1.00678	0.84781	1.26047	0.256746	0.333564	0.359353	0.0162835	2.6376	0.0752931	Atp5b	One sex_Female only
612	ONLI_0788	HILICPOS	1-Methyladenosine	0.084496	1	0.98653	0.549484	38	6	0.0311693	9.48728e-06	0.986958	0.184436	2.9433e-05	0.996343	0.112932	0.683938	0.184484	0.709527	0.112151	0.720087	0.446148	0.725256	1.14436	1.15273	1.15171	6.84634e-05	-1.17302	0.000226677	0.0213743	-1.16246	0.0863334	Atp5b	Genotype effect with no sex effect(real)
6131	ONLI_0789	HILICPOS	1-Methylguanosine	0.0175538	1	0.968929	0.999554	39	6	0.0115398	0.0272667	0.38608	0.116581	0.0470157	0.784101	0.0140883	1.03639	0.0132422	1.35376	0.249691	0.706404	0.168304	0.931915	1.29708	1.37614	1.20459	0.0802538	-0.492214	0.132025	0.29426	-1.13957	0.439994	Atp5b	Genotype effect with no sex effect(real)
6182	ONLI_0798	HILICPOS	Ala-Ile	0.0331694	1	0.997671	0.999857	35	6	0.0297389	0.000455116	0.17811	0.184436	0.00104863	0.662161	0.0572897	-0.818431	0.57969	-0.32029	0.00814375	-1.24513	0.805636	0.279012	0.698664	0.886928	0.437743	0.00207095	-0.833468	0.00497534	0.163403	-1.75831	0.286774	Atp5b	Genotype effect with no sex effect(real)
6212	ONLI_0802	HILICPOS	Cytosine	5.89654e-07	1	0.977368	0.803559	39	6	0.0186315	0.0407553	0.371827	0.149812	0.0677535	0.775131	0.0309175	0.918293	0.373777	0.587789	0.0108405	1.26607	0.650191	0.348117	1.62125	1.66852	1.57209	0.0245352	-0.673723	0.046105	0.995628	0.00456014	0.998943	Atp5b	Genotype effect with no sex effect(real)
622	ONLI_0803	HILICPOS	Galactosamine	0.98608	1	0.997234	0.994178	39	6	0.389604	0.00732881	0.0133173	0.601976	0.0137502	0.59673	0.40308	-0.364085	0.0654276	-0.990724	0.687412	0.247633	0.28328	0.946271	0.935033	0.813723	1.04373	0.0575288	0.581933	0.0983355	0.0224598	1.82029	0.0863334	Atp5b	Interaction_cannot classify2
625	ONLI_0809	HILICPOS	N-Acetylcytidine	0.18868	1	0.873625	0.995003	40	6	0.0296612	5.42527e-07	0.901465	0.184436	2.06527e-06	0.969349	0.111353	0.684921	0.0974173	0.722916	0.199856	0.646926	0.318526	0.93081	1.23669	1.20748	1.28062	3.82838e-06	-1.2477	1.57946e-05	0.0984702	-1.32369	0.203127	Atp5b	Genotype effect with no sex effect(real)
626	ONLI_0810	HILICPOS	N-Acetylglucosamine	0.342813	1	0.999987	0.999779	38	6	0.0021788	0.000947176	0.247516	0.044023	0.00207326	0.696237	0.00785384	1.11646	0.212467	0.70804	0.0022247	1.48332	0.474798	0.194785	1.41081	1.36748	1.42279	0.00509789	0.789673	0.0109459	0.0290332	1.56495	0.0977701	Atp5b	Genotype effect with no sex effect(real)
6301	ONLI_0814	HILICPOS	Putrescine	0.0422315	1	0.740588	0.876029	37	6	0.137887	0.0424194	0.0428717	0.336863	0.0700765	0.635599	0.149862	0.623947	0.761469	0.144052	0.10673	1.1161	0.903671	0.725256	1.10375	1.01952	1.18334	0.162624	0.453494	0.245494	0.0111412	1.42554	0.0691281	Atp5b	Interaction_cannot classify2
6372	ONLI_0822	HILICPOS	5'-Methylthioadenosine	2.10543e-05	1	0.984888	0.839505	37	5	8.2383e-06	0.335519	0.451468	0.0017563	0.431304	0.806768	1.52253e-05	1.83393	0.00743278	2.12306	0.0001771	1.57317	0.141358	0.0846178	2.38784	2.4716	2.29314	0.286506	0.290326	0.3906	0.525771	-0.259565	0.669317	Atp5b	Genotype effect with no sex effect(real)
6381	ONLI_0823	HILICPOS	6-Methyladenosine	0.0104398	1	0.995782	0.733377	39	6	0.00522	0.439139	0.254911	0.0747884	0.531554	0.696237	0.00663233	1.13725	0.0212531	1.57367	0.174327	0.698594	0.215914	0.903749	1.562	1.72689	1.38704	0.77118	-0.0875815	0.839351	0.157539	-0.962657	0.27772	Atp5b	Genotype effect with no sex effect(real)
639	ONLI_0824	HILICPOS	Acetylcarnitine	0.787197	1	0.918605	0.750354	40	6	0.00344521	0.0308389	0.0324627	0.0603295	0.0527138	0.622641	0.0135225	1.04121	0.703941	0.236598	0.000644298	1.84583	0.870653	0.0846178	1.18663	1.05016	1.33525	0.0243393	-0.616193	0.0458837	0.379614	0.993037	0.534172	Atp5b	One sex_Male only
6462	ONLI_0837	HILICPOS	Aspartic acid	0.436317	1	0.831637	0.708253	36	6	0.147138	0.00761065	0.00521457	0.348182	0.0142451	0.59673	0.159724	0.610602	0.931992	-0.0491804	0.0244436	1.27038	0.972728	0.43905	1.14298	0.949595	1.31417	0.0662615	0.575446	0.112047	0.00749254	1.89501	0.0628098	Atp5b	Interaction_One sex_Male only2
6471	ONLI_0838	HILICPOS	Biliverdin	0.000938385	1	0.964677	0.94617	38	6	0.000404127	0.00288518	0.486259	0.0191886	0.00571237	0.825802	0.00191849	1.28375	0.00572752	1.54274	0.0502069	1.06703	0.141358	0.590493	2.16142	2.67205	1.90815	0.00563055	0.8032	0.0119164	0.483249	0.327494	0.631158	Atp5b	Genotype effect with no sex effect(real)
651	ONLI_0843	HILICPOS	Choline	0.246497	1	0.603369	0.916349	39	6	0.0330348	0.419634	0.237086	0.189012	0.511084	0.696237	0.0382864	0.883414	0.0180995	1.35277	0.52477	0.411613	0.198089	0.94265	1.16828	1.24307	1.09068	0.764737	-0.0953809	0.834644	0.0165179	-1.03654	0.0752931	Atp5b	Genotype effect with no sex effect(real)
6611	ONLI_0854	HILICPOS	Glutamic acid	0.640747	1	0.856577	0.999928	39	6	0.000639054	1.46513e-07	0.171824	0.0245759	6.04463e-07	0.662161	0.015965	1.01856	0.154857	0.631708	0.00120571	1.37444	0.396778	0.118763	1.32214	1.19409	1.40263	2.10954e-06	1.20809	9.39161e-06	0.000515965	1.95083	0.0338817	Atp5b	Genotype effect with no sex effect(real)
664	ONLI_0859	HILICPOS	Gly-val	0.585059	1	0.890396	0.279595	39	6	0.0132965	0.444699	0.166054	0.123268	0.536636	0.662161	0.0161187	-1.01718	0.0273757	-1.55687	0.334265	-0.47592	0.232623	0.93942	0.799725	0.715569	0.882778	0.842934	0.061444	0.8856	0.028292	1.1424	0.0966541	Atp5b	Genotype effect with no sex effect(real)
6651	ONLI_0860	HILICPOS	Guanosine	1.44501e-06	1	0.547155	0.903726	25	5	0.0302722	0.0244289	0.0372479	0.184436	0.0426829	0.622641	0.327612	0.474889	0.693825	-0.305046	0.00294692	1.71975	0.86835	0.209219	2.27713	0.340282	5.96906	0.700481	0.149926	0.78184	0.00368363	2.17473	0.0504667	Atp5b	One sex_Male only
6691	ONLI_0864	HILICPOS	Hypoxanthine	3.25184e-06	1	0.80984	0.909163	34	5	0.000505678	0.0375554	0.911533	0.0221375	0.0628766	0.969349	0.000764962	1.49053	0.00548373	1.50929	0.0276468	1.594	0.141358	0.450752	2.80526	3.00861	2.77765	0.0810137	0.526402	0.132446	0.235646	0.611106	0.370637	Atp5b	Genotype effect with no sex effect(real)
6701	ONLI_0866	HILICPOS	Kynurenine	0.00353823	1	0.41048	0.41048	40	6	0.076673	6.86037e-12	0.0363017	0.258989	1.07947e-10	0.622641	0.611692	-0.221256	0.433847	0.297758	0.0424246	-0.74027	0.701995	0.557176	1.01661	1.12638	0.809652	2.33125e-09	-1.41161	2.87036e-08	0.00803024	-2.44964	0.0641997	Atp5b	Interaction_One sex_Male only2
6781	ONLI_0878	HILICPOS	N-Methylhistidine	0.177464	1	0.997357	0.839803	38	6	0.00142195	0.00566271	0.0449701	0.0340142	0.0107783	0.635599	0.00366352	1.21062	0.000659791	1.8778	0.360234	0.49666	0.0649894	0.93942	1.18786	1.3203	1.06528	0.00120248	0.888722	0.00302734	0.580684	-0.492415	0.718334	Atp5b	One sex_Female only
6822	ONLI_0884	HILICPOS	Pipecolic acid	0.340038	1	0.387732	0.99335	35	6	6.69712e-05	4.17995e-05	0.00925078	0.00659666	0.000116815	0.59673	0.00230985	1.26562	0.000497242	2.02039	0.289043	0.412792	0.0649894	0.93942	1.34976	1.58364	1.14296	1.26166e-05	1.14405	4.68955e-05	0.606553	-0.463554	0.73868	Atp5b	One sex_Female only
6852	ONLI_0887	HILICPOS	Propionylcarnitine	0.0269878	1	0.496876	0.850481	39	6	0.00653877	0.0763201	0.0153755	0.0863835	0.11792	0.59673	0.0257318	0.947239	0.864506	0.0925096	0.0058311	1.79192	0.944935	0.246212	1.25646	1.02485	1.50375	0.193878	-0.392027	0.28397	0.0798686	1.30738	0.1758	Atp5b	One sex_Male only
6912	ONLI_0896	HILICPOS	TMAO	0.000144552	1	0.303616	0.313709	37	6	0.00254938	2.04979e-11	0.68127	0.0502228	2.30748e-10	0.886082	0.103704	0.702556	0.0868837	0.630785	0.0199901	0.817287	0.310667	0.425736	1.57399	1.54379	1.86028	4.94489e-10	-1.58951	1.25696e-08	0.000499985	-1.403	0.0338817	Atp5b	Genotype effect with no sex effect(real)
694	ONLI_0908	HILICNEG	10-Hydroxydecanoic acid	0.296766	1	0.924478	0.964422	37	5	0.00728545	0.962417	0.064667	0.0897021	0.968563	0.659961	0.00924781	1.18544	0.119017	1.10566	0.0489875	1.24513	0.34906	0.584881	1.62411	1.5635	1.67751	0.887564	-0.0451449	0.919603	0.826349	0.0943258	0.905229	Atp5b	Genotype effect with no sex effect(real)
697	ONLI_0917	HILICNEG	2-Hydroxy-3-methylbutyric acid	0.959246	1	0.705129	0.322994	34	6	0.000541355	0.000123064	0.370103	0.022452	0.000312821	0.775131	0.00655192	1.14369	0.0206922	0.870617	0.0170555	1.41676	0.215914	0.419992	1.29485	1.21165	1.40528	1.96409e-05	-1.15429	7.06712e-05	0.511058	-0.608138	0.656955	Atp5b	Genotype effect with no sex effect(real)
701	ONLI_0923	HILICNEG	3-Hydroxy-4-methoxybenzoic acid	0.000201191	1	0.889279	0.914882	38	5	0.00217323	0.0247138	0.0351519	0.044023	0.0430851	0.622641	0.00689693	1.22593	0.400853	0.498062	0.000858667	2.19813	0.673501	0.0966614	2.08949	1.36273	3.65082	0.0280116	-0.649189	0.051733	0.125935	1.05088	0.23855	Atp5b	One sex_Male only
7021	ONLI_0924	HILICNEG	3-Hydroxyoctanoic acid	0.583973	1	0.472663	0.451542	36	5	0.00811289	0.031217	0.678297	0.0974744	0.0531295	0.884933	0.0102968	1.1707	0.0385754	1.4275	0.0675959	1.08987	0.237811	0.637342	1.51448	1.53053	1.57928	0.0809101	-0.542232	0.132446	0.176918	-0.879858	0.300455	Atp5b	Genotype effect with no sex effect(real)
7081	ONLI_0935	HILICNEG	4-Pyridoxic acid	0.032379	1	0.917802	0.999589	35	6	0.0351931	7.92959e-05	0.126859	0.190828	0.000211505	0.662161	0.0951376	0.722301	0.0260293	1.24786	0.63886	0.222411	0.232623	0.94265	1.39647	1.63993	1.06395	0.0024475	-0.898267	0.00577435	0.016203	-1.92371	0.0752931	Atp5b	Genotype effect with no sex effect(real)
720	ONLI_0989	HILICNEG	Hexanoylglycine	0.426712	1	0.86749	0.398529	38	6	0.0285824	0.00160971	0.663812	0.184436	0.00340788	0.883617	0.0589917	0.80962	0.0111274	0.965842	0.340594	0.653398	0.155937	0.93942	1.44442	1.69379	1.29951	0.00349053	0.913874	0.0078363	0.0236075	0.60143	0.0881645	Atp5b	Genotype effect with no sex effect(real)
723	ONLI_1000	HILICNEG	Ketoisovaleric acid	0.758303	1	0.986283	0.966004	38	6	0.0272036	0.720734	0.0414507	0.18266	0.775872	0.629935	0.0319432	0.914116	0.00743773	1.71158	0.845371	0.110331	0.141358	0.977341	1.24656	1.49467	1.00531	0.699589	0.12008	0.78184	0.0222709	-1.48117	0.0863334	Atp5b	One sex_Female only
7361	ONLI_1042	HILICNEG	S-Sulfocysteine	0.375158	1	0.782078	0.992804	35	6	0.0319824	0.657143	0.179894	0.185392	0.723225	0.662161	0.0376697	-0.890748	0.0892391	-0.872616	0.210827	-0.922669	0.312748	0.93081	0.508142	0.559308	0.457823	0.636649	0.16088	0.731497	0.827113	0.110827	0.905229	Atp5b	Genotype effect with no sex effect(real)
743	ONLI_1064	BileAcid_Steroids	corticosterone	0.00313898	1	0.990972	0.700553	37	5	0.0414355	0.490347	0.173753	0.204754	0.579301	0.662161	0.0479617	0.916884	0.0936005	0.718097	0.160127	1.07627	0.315502	0.865262	1.7194	1.62585	1.78178	0.406003	-0.271017	0.512709	0.901328	0.0871528	0.952072	Atp5b	Genotype effect with no sex effect(real)
745	ONLI_1069	BileAcid_Steroids	testosterone	1.01182e-11	1	0.744642	0.0665098	30	5	5.65722e-08	7.45143e-08	0.243519	4.45789e-05	3.29872e-07	0.696237	6.23817e-05	1.71434	5.0095e-05	1.85701	0.000352635	1.28766	0.0394749	0.0846178	23.0686	12.1476	23.4457	1.33845e-06	1.2761	6.20413e-06	0.0557822	0.706744	0.140436	Atp5b	Genotype effect with no sex effect(real)
760	ONLI_1097	BileAcid_Steroids	omega-Muricholic acid	0.00201708	1	0.999988	0.999996	24	5	5.91638e-05	0.000349855	0.727351	0.00659666	0.000825406	0.906066	0.000673065	-1.50312	0.0112308	-1.53627	0.00788153	-1.32166	0.155937	0.279012	0.342198	0.346499	0.385553	0.00232213	-0.956152	0.00551156	0.209992	-0.741542	0.338711	Atp5b	Genotype effect with no sex effect(real)
766	ONLI_1104	BileAcid_Steroids	Taurodeoxycholic acid	7.53699e-05	1	0.996948	0.90905	34	6	0.00174789	0.384467	0.718715	0.0382594	0.477103	0.906066	0.00243597	1.26062	0.0159439	1.41306	0.069354	1.14265	0.176955	0.637342	2.98913	3.24848	2.77401	0.53671	-0.195378	0.640799	0.530795	-0.465793	0.673638	Atp5b	Genotype effect with no sex effect(real)
7681	ONLI_1106	BileAcid_Steroids	Ursodeoxycholic acid	1.65198e-05	1	0.42234	0.999669	26	4	0.00172129	1.83412e-07	0.00120953	0.0382594	7.3365e-07	0.476556	0.154761	0.749499	0.238491	-0.558664	0.00318607	1.54661	0.499394	0.209219	1.48654	0.724778	2.98299	7.47859e-07	-1.66091	3.82671e-06	0.285224	0.444367	0.430979	Atp5b	One sex_Male only
772	ONLI_1110	BileAcid_Steroids	Chenodeoxycholic acid	4.52981e-06	1	0.741568	0.790394	35	5	0.036089	0.00169623	0.374341	0.193457	0.00356435	0.776049	0.136382	0.699815	0.545606	0.430958	0.0231701	1.12679	0.780285	0.43905	1.42094	1.17428	2.72041	0.00127994	-1.04049	0.00320189	0.456702	-0.344663	0.611413	Atp5b	Genotype effect with no sex effect(real)
773	ONLI_1111	BileAcid_Steroids	Deoxycholic acid	0.00600562	1	0.986597	0.999005	31	6	0.0103721	0.378127	0.0446021	0.111443	0.472209	0.635599	0.0133066	1.05428	0.206637	0.903909	0.00298744	1.26736	0.472818	0.209219	2.10942	1.79924	2.9173	0.275474	-0.388808	0.378837	0.948932	-0.0253535	0.9826	Atp5b	One sex_Male only
7791	ONLI_1133	Oxylipins	PGE3	0.0944515	1	0.813716	0.82346	15	6	0.00392403	0.188411	0.669682	0.0657901	0.265121	0.884868	0.00675303	-1.19178	0.0644287	-1.32684	0.0595184	-1.02189	0.28328	0.615386	0.276859	0.233713	0.359505	0.258743	-0.522421	0.360831	0.721405	-0.217473	0.838448	Atp5b	Genotype effect with no sex effect(real)
7841	ONLI_1140	Oxylipins	9,10-DiHOME	0.0406788	1	0.959014	0.685899	36	6	0.0081641	0.0358813	0.0111026	0.0974744	0.0604156	0.59673	0.0835679	0.746679	0.0029961	1.75273	0.683954	-0.250683	0.10055	0.946271	1.28849	1.70178	0.897319	0.611615	0.156442	0.709798	0.0500219	-1.84697	0.130992	Atp5b	One sex_Female only
7861	ONLI_1142	Oxylipins	12,13-DiHODE	0.0424586	1	0.92025	0.982126	34	6	0.0559671	0.078943	0.0292271	0.225816	0.121026	0.615397	0.337574	0.420893	0.00891638	1.32472	0.516976	-0.457071	0.141358	0.94265	1.13109	1.43922	0.874881	0.191662	0.439627	0.282186	0.111674	-1.34216	0.219374	Atp5b	Interaction_One sex_Female only2
788	ONLI_1144	Oxylipins	14,15-DiHETrE	1.83519e-05	0.999999	0.997451	0.977875	40	5	0.0353565	0.00404308	0.0544959	0.190828	0.00782789	0.651065	0.0858258	0.797698	0.00846075	1.78933	0.670518	0.23683	0.141358	0.946271	1.62562	2.46939	0.994624	0.0378117	-0.601309	0.0670799	0.0099641	-2.15381	0.0678059	Atp5b	Genotype effect with no sex effect(real)
789	ONLI_1145	Oxylipins	11,12-DiHETrE	0.000362988	0.996595	0.961041	0.651127	40	5	0.0527301	6.07216e-06	0.0395077	0.2222	1.95301e-05	0.622641	0.202643	0.593702	0.00908288	1.57088	0.8247	0.107083	0.141358	0.971856	1.42503	1.97635	0.995851	0.000248045	-0.98902	0.000718602	0.00732389	-2.45282	0.0624878	Atp5b	Interaction_One sex_Female only2
790	ONLI_1146	Oxylipins	8,9-DiHETrE	0.165189	1	0.999972	0.455037	37	5	0.0340606	7.15701e-10	0.189394	0.189012	4.82028e-09	0.66626	0.325253	0.464377	0.0273149	1.08164	0.440539	0.315732	0.232623	0.94265	1.17605	1.33924	1.14023	3.57815e-08	-1.38943	2.61072e-07	0.0709937	-2.15534	0.162617	Atp5b	Genotype effect with no sex effect(real)
7981	ONLI_1158	Oxylipins	13-HOTE	0.00230942	1	0.90779	0.538267	37	5	0.830775	0.0121681	0.0269915	0.908025	0.0219415	0.615397	0.835808	0.0984501	0.255584	-0.837738	0.262853	0.617936	0.520414	0.931915	1.07899	0.641915	1.25236	0.0840598	0.553092	0.136575	0.0052767	2.00877	0.0513294	Atp5b	Interaction_cannot classify2
800	ONLI_1161	Oxylipins	15-HETE	3.22395e-05	1	0.862956	0.951707	37	4	0.0140788	0.0602091	0.604412	0.123268	0.0954623	0.871145	0.017336	1.20398	0.0295469	1.44441	0.19641	0.976261	0.232829	0.93081	1.99173	2.28602	1.64789	0.131585	-0.470222	0.202518	0.0552161	-0.938368	0.139456	Atp5b	Genotype effect with no sex effect(real)
8031	ONLI_1164	Oxylipins	11-HETE	0.00126639	1	0.340234	0.897992	35	4	0.00406153	0.046081	0.440852	0.0666767	0.0756496	0.806768	0.0090915	1.31103	0.0967961	0.986524	0.0348538	1.65487	0.318526	0.499359	1.78311	1.54328	2.12624	0.0288401	-0.676531	0.0530736	0.991038	-0.00818813	0.998943	Atp5b	Genotype effect with no sex effect(real)
807	ONLI_1168	Oxylipins	12S-HEPE	0.000317522	1	0.931884	0.941746	36	5	0.0239899	0.249582	0.0312384	0.171855	0.34085	0.615397	0.0286967	1.00966	0.817731	0.148379	0.0197199	1.55714	0.923169	0.425736	1.77133	1.03015	2.15475	0.68913	0.125439	0.773553	0.0886194	1.5342	0.189247	Atp5b	One sex_Male only
809	ONLI_1171	Oxylipins	17-HDoHE	2.18486e-06	1	0.998169	0.950107	32	5	0.0302256	0.443979	0.176154	0.184436	0.536588	0.662161	0.0363583	0.9729	0.00950756	1.62699	0.518864	0.453443	0.141358	0.94265	2.06413	4.96639	0.901132	0.273396	0.381252	0.377958	0.102716	-0.792292	0.207652	Atp5b	Genotype effect with no sex effect(real)
810	ONLI_1172	Oxylipins	14-HDoHE	0.000873703	1	0.937862	0.991339	36	5	0.0221571	0.631196	0.100575	0.168437	0.700539	0.659961	0.0266185	1.0224	0.253408	0.688472	0.0707695	1.30353	0.518215	0.637342	1.54462	1.35179	1.68876	0.406662	-0.274712	0.51272	0.309543	0.340344	0.457636	Atp5b	Genotype effect with no sex effect(real)
8142	ONLI_1176	Oxylipins	15-KETE	0.589327	1	0.957741	0.918507	14	6	0.0243883	0.369296	0.0364315	0.1724	0.464124	0.622641	0.0351488	0.96862	0.558439	0.376856	0.0220836	1.56038	0.787656	0.43905	1.14124	1.03961	1.25759	0.173835	-0.728022	0.260918	0.29328	0.455506	0.439362	Atp5b	One sex_Male only
8201	ONLI_1182	Oxylipins	15,16-EpODE	0.946686	1	0.96538	0.830636	39	6	0.0319965	0.329854	0.126625	0.185392	0.426806	0.662161	0.037141	0.888428	0.224377	0.83942	0.069533	0.945114	0.485849	0.637342	1.31203	1.27661	1.3543	0.330428	-0.299477	0.439826	0.823477	-0.193782	0.905021	Atp5b	Genotype effect with no sex effect(real)
822	ONLI_1186	Oxylipins	11,12-EpETrE	0.00111523	0.999995	0.482598	0.506254	38	6	0.00858391	3.82175e-12	0.194913	0.0994724	8.93572e-11	0.677171	0.12989	0.653372	0.00680053	0.960111	0.366119	0.346634	0.141358	0.93942	1.31502	1.38913	1.13782	2.18234e-09	-1.4513	2.77368e-08	0.00737483	-2.06477	0.0624878	Atp5b	Genotype effect with no sex effect(real)
8241	ONLI_1188	Oxylipins	1718-EpETE	0.0465878	0.999968	0.782972	0.982964	27	6	0.00973581	0.62311	0.0740726	0.108054	0.696469	0.659961	0.0129284	1.06361	0.012953	1.15611	0.228341	0.952613	0.167327	0.93081	1.39802	1.49926	1.29252	0.648351	0.16648	0.741511	0.959925	-0.0370174	0.984923	Atp5b	Genotype effect with no sex effect(real)
1	ONLI_0001	gctof	xylulose NIST	0.000222174	1	0.754706	0.642322	40	6	0.00141531	0.840058	0.473692	0.0618371	0.879052	0.942981	0.00190921	-1.28306	0.00984504	-1.55443	0.0904836	-1.01168	0.308396	0.713213	0.386697	0.286837	0.486527	0.94783	-0.0191504	0.960232	0.427605	0.523598	0.620184	Atp6v0d1	Genotype effect with no sex effect(real)
4	ONLI_0005	gctof	uridine	0.0469533	1	0.993142	0.999918	38	6	0.0135839	0.0134188	0.00427527	0.201875	0.0251484	0.448625	0.531743	0.273267	0.00566503	1.43664	0.19919	-0.863208	0.2773	0.846984	1.26477	1.97369	0.758166	0.0761085	0.511006	0.126544	0.170605	-1.78884	0.379636	Atp6v0d1	One sex_Female only
6	ONLI_0007	gctof	urea	0.19934	1	0.948967	0.866213	40	6	0.034921	0.727267	0.198689	0.291141	0.786046	0.88761	0.040236	0.874105	0.26026	0.764169	0.0755894	0.984041	0.983072	0.677728	1.19442	1.18825	1.20051	0.817665	0.0709691	0.875356	0.725158	0.290841	0.840609	Atp6v0d1	Genotype effect with no sex effect(real)
11	ONLI_0014	gctof	threonine	0.570845	1	0.999671	0.999723	40	6	0.0368221	0.00716094	0.487032	0.293461	0.0142317	0.942981	0.0614517	-0.800157	0.382388	-0.540739	0.042161	-1.05958	0.997185	0.563938	0.788688	0.858143	0.703483	0.0232447	-0.671952	0.0440867	0.143588	-1.19079	0.350242	Atp6v0d1	Genotype effect with no sex effect(real)
12	ONLI_0015	gctof	threonic acid	0.0207576	1	0.617544	0.32164	38	5	0.00227288	0.0422259	0.0143063	0.0707949	0.0694088	0.528994	0.0151322	1.11156	0.00102234	2.31612	0.659859	0.260758	0.115221	0.967418	1.35522	1.76773	1.09378	0.180952	0.388866	0.269889	0.130614	-1.6665	0.332062	Atp6v0d1	One sex_Female only
13	ONLI_0017	gctof	sulfuric acid	0.0148167	1	0.898071	0.956447	38	6	0.0321215	0.757953	0.110042	0.281952	0.805964	0.88761	0.0374054	0.888344	0.528619	0.425867	0.0142647	1.35082	0.997185	0.352106	1.68587	1.21686	2.26027	0.475389	-0.216062	0.583911	0.492244	0.708891	0.682325	Atp6v0d1	Genotype effect with no sex effect(real)
242	ONLI_0030	gctof	pinitol	0.279074	1	0.542015	0.477478	39	6	0.00971206	0.00148102	0.0021081	0.163039	0.00328238	0.415823	0.211407	-0.541423	0.412336	0.491472	0.00348942	-1.5647	0.997185	0.203609	0.820335	1.14112	0.443023	0.190062	-0.375214	0.280297	0.0136466	-2.43138	0.189456	Atp6v0d1	One sex_Male only
28	ONLI_0034	gctof	phenylalanine	0.67819	1	0.278531	0.696646	39	6	0.0025947	0.395021	0.00937413	0.073115	0.493151	0.502699	0.0034159	-1.21804	0.15317	-0.762204	0.00976644	-1.6772	0.888614	0.314657	0.766446	0.870161	0.659933	0.664299	-0.129968	0.749831	0.0557459	-1.04497	0.243879	Atp6v0d1	One sex_Male only
37	ONLI_0047	gctof	methionine sulfoxide	0.0631879	1	0.960625	0.865264	40	6	0.0170969	0.156779	0.501567	0.224333	0.221285	0.942981	0.0203882	-0.981708	0.0521412	-1.24344	0.200294	-0.719974	0.584012	0.846984	0.648796	0.607153	0.699035	0.136706	-0.444745	0.209033	0.925051	0.0787232	0.954072	Atp6v0d1	Genotype effect with no sex effect(real)
38	ONLI_0048	gctof	methionine	0.318049	1	0.455094	0.217904	39	6	0.00197563	0.535842	0.00743172	0.0707949	0.632903	0.502699	0.00263735	-1.24777	0.279317	-0.718467	0.000482895	-1.7763	0.983072	0.0635007	0.629521	0.771602	0.483204	0.919912	-0.030014	0.944921	0.0320989	-1.08785	0.224025	Atp6v0d1	One sex_Male only
454	ONLI_0057	gctof	lauric acid	0.840143	1	0.977107	0.98238	40	6	0.0326229	0.880151	0.125461	0.281952	0.910731	0.88761	0.0377104	0.884897	0.383011	0.456347	0.0594743	1.31345	0.997185	0.617437	1.27474	1.15927	1.39175	0.822854	-0.0686936	0.878528	0.319338	0.788407	0.539524	Atp6v0d1	Genotype effect with no sex effect(real)
484	ONLI_0060	gctof	isothreonic acid	0.00218634	1	0.999942	0.989239	39	5	0.00102435	0.000102499	0.501359	0.053881	0.000281784	0.942981	0.0102666	1.16893	0.033179	1.05295	0.0215913	1.54186	0.484782	0.448303	1.40479	1.25664	1.64409	0.00106995	0.912848	0.00274982	0.0667507	1.40176	0.253911	Atp6v0d1	Genotype effect with no sex effect(real)
492	ONLI_0061	gctof	isoleucine	0.414711	1	0.738864	0.884898	40	6	0.0173439	0.0063428	0.878315	0.224333	0.0127017	0.976043	0.0336835	-0.903458	0.111525	-0.847109	0.111236	-0.959807	0.792526	0.770022	0.789587	0.823147	0.750142	0.0122796	-0.73513	0.0243432	0.282213	-0.847828	0.498134	Atp6v0d1	Genotype effect with no sex effect(real)
526	ONLI_0064	gctof	inosine	0.000296202	1	0.485415	0.0818466	35	6	0.731262	0.00744266	0.0499415	0.966442	0.0147544	0.838379	0.741339	0.145337	0.185146	0.879582	0.184759	-0.617259	0.934655	0.846984	0.936848	1.85795	0.475509	0.00295712	0.992273	0.00678247	0.385673	-0.504567	0.595786	Atp6v0d1	Interaction_cannot classify2
531	ONLI_0065	gctof	indoxyl sulfate	0.00120898	1	0.908585	0.875593	39	6	0.0138165	0.00341635	0.61886	0.201875	0.00717145	0.962309	0.0326311	0.909614	0.256905	0.741216	0.0119237	1.10008	0.983072	0.335993	1.50494	1.35888	1.79759	0.00482374	-0.860575	0.0104847	0.207298	-0.501713	0.419381	Atp6v0d1	Genotype effect with no sex effect(real)
551	ONLI_0067	gctof	indole-3-lactate	0.0765435	1	0.99304	0.925644	37	6	0.0332338	1.52579e-05	0.741591	0.281952	4.83474e-05	0.97214	0.0921558	0.726319	0.262002	0.603309	0.0787756	0.817568	0.983072	0.690599	1.30938	1.30779	1.29608	2.49862e-05	-1.17517	8.96097e-05	0.326077	-0.960911	0.546347	Atp6v0d1	Genotype effect with no sex effect(real)
567	ONLI_0068	gctof	indole-3-acetate	0.0916079	1	0.99925	0.990645	40	6	0.0232825	6.30435e-08	0.452955	0.255138	3.14819e-07	0.942981	0.103924	0.699061	0.0453675	0.923182	0.300368	0.474939	0.553674	0.89769	1.22754	1.24677	1.19522	4.43724e-06	-1.23205	1.85237e-05	0.0175842	-1.68029	0.189456	Atp6v0d1	Genotype effect with no sex effect(real)
573	ONLI_0069	gctof	hydroxylamine	0.0625811	1	0.965345	0.710597	37	6	0.188668	0.0475325	0.0400036	0.62247	0.076537	0.838379	0.202019	-0.554315	0.884866	0.100231	0.00957676	-1.17777	0.997185	0.314657	0.903717	0.966972	0.841334	0.233997	-0.383443	0.333041	0.0140375	-1.66144	0.189456	Atp6v0d1	Interaction_One sex_Male only2
601	ONLI_0072	gctof	hippuric acid	2.07998e-05	1	0.981918	0.834857	40	5	0.0479367	0.435291	0.134138	0.320526	0.530826	0.88761	0.0545618	0.889675	0.399722	0.597337	0.0207594	1.37263	0.997185	0.448303	2.12983	1.84077	2.57817	0.572547	0.177803	0.668254	0.0362447	0.9531	0.235396	Atp6v0d1	Genotype effect with no sex effect(real)
611	ONLI_0073	gctof	hexuronic acid	2.26498e-05	1	0.21123	0.621085	34	6	0.047705	0.636258	0.161307	0.320526	0.718776	0.88761	0.0551994	-0.826405	0.000896046	-1.39265	0.712387	-0.266226	0.115221	0.967418	0.689713	0.64073	0.750113	0.915068	-0.0343671	0.944644	0.301368	1.09206	0.519771	Atp6v0d1	Genotype effect with no sex effect(real)
627	ONLI_0074	gctof	hexose	1.13275e-09	1	0.966944	0.935385	34	4	0.059399	0.0238211	0.0051174	0.362252	0.0421409	0.448625	0.0684019	0.938737	0.88419	0.103395	0.00738063	1.77408	0.997185	0.314657	3.63936	1.1046	5.58159	0.100531	0.507972	0.162538	0.0654029	2.17866	0.253911	Atp6v0d1	Interaction_One sex_Male only2
64	ONLI_0076	gctof	hexadecane	0.149061	1	0.951324	0.657432	39	6	0.0461534	0.892383	0.254776	0.318807	0.919178	0.88761	0.0526282	0.828769	0.28026	0.719401	0.105745	0.936517	0.983072	0.765441	1.27306	1.22566	1.32099	0.84391	-0.0631369	0.893751	0.80464	0.153979	0.897238	Atp6v0d1	Genotype effect with no sex effect(real)
741	ONLI_0089	gctof	fucose	0.753319	1	0.895476	0.997281	40	6	0.0156837	0.578078	0.0709934	0.213352	0.673713	0.88761	0.0187815	0.993889	0.277128	0.632003	0.0338389	1.35577	0.983072	0.542081	1.33114	1.2065	1.45283	0.824519	0.0643449	0.879115	0.458681	0.788117	0.650897	Atp6v0d1	Genotype effect with no sex effect(real)
75	ONLI_0090	gctof	fructose	1.68488e-05	0.0164552	0.670867	0.0168628	36	5	0.00949306	0.00341639	0.00778618	0.162827	0.00717145	0.502699	0.197679	0.56714	0.00724252	1.83827	0.636701	-0.242566	0.289751	0.965643	1.97191	3.33325	0.820803	0.246935	-0.31329	0.347914	0.070895	-2.39412	0.256588	Atp6v0d1	One sex_Female only
76	ONLI_0091	gctof	ethanolamine	0.0528521	1	0.990887	0.846911	38	6	0.00459878	0.0285434	0.00181132	0.102085	0.0492795	0.415823	0.00591351	-1.1526	0.235931	-0.706495	0.00360708	-1.57289	0.983072	0.203609	0.776447	0.838777	0.711373	0.0973971	-0.490433	0.15812	0.0300785	-1.35682	0.218392	Atp6v0d1	One sex_Male only
81	ONLI_0096	gctof	cysteine	2.52697e-05	1	0.846109	0.858558	39	6	0.00111279	0.552438	0.882558	0.0548746	0.646697	0.978003	0.00152988	1.30749	0.0221416	1.36519	0.0371006	1.25407	0.391772	0.542081	2.72647	3.17184	2.4367	0.55649	0.167085	0.653379	0.951618	0.0559689	0.975099	Atp6v0d1	Genotype effect with no sex effect(real)
851	ONLI_0102	gctof	caprylic acid	0.36312	1	0.918904	0.877263	40	5	0.0363929	0.402109	0.114728	0.293	0.499924	0.88761	0.0419797	-0.938856	0.637695	-0.398289	0.0117519	-1.28085	0.997185	0.335993	0.830827	0.935269	0.762704	0.715357	-0.110315	0.788292	0.340105	-0.992874	0.556728	Atp6v0d1	Genotype effect with no sex effect(real)
872	ONLI_0104	gctof	beta-alanine	0.496171	1	0.717795	0.685448	37	6	0.000945644	0.0386022	0.00187459	0.0532938	0.0642556	0.415823	0.00484403	-1.17809	0.534471	-0.368817	0.00034315	-2.0321	0.997185	0.0635007	0.717966	0.921256	0.532218	0.0672586	0.551753	0.114123	0.053304	-1.11153	0.241121	Atp6v0d1	One sex_Male only
90	ONLI_0110	gctof	alpha-ketoglutarate	0.0383756	1	0.98597	0.988031	39	6	0.0311659	0.247764	0.0846614	0.281952	0.333593	0.88761	0.0362234	-0.892562	0.274011	-0.631026	0.0699685	-1.16456	0.983072	0.676225	0.716142	0.864775	0.589005	0.167249	0.408015	0.251351	0.907849	-0.125518	0.942864	Atp6v0d1	Genotype effect with no sex effect(real)
921	ONLI_0113	gctof	alanine	0.294462	1	0.933515	0.931086	36	6	0.0207029	0.796005	0.105812	0.244344	0.841888	0.88761	0.0248522	-0.955963	0.326882	-0.624126	0.0321852	-1.2878	0.996274	0.542081	0.819581	0.884599	0.757745	0.583769	0.171939	0.680345	0.596263	-0.491734	0.755562	Atp6v0d1	Genotype effect with no sex effect(real)
992	ONLI_0120	gctof	3-aminoisobutyric acid	0.513391	1	0.799841	0.878466	39	6	0.0356442	0.773202	0.0333594	0.292951	0.821071	0.838379	0.0411577	-0.871184	0.915293	-0.0563332	0.0124054	-1.67848	0.997185	0.337514	0.629968	0.945636	0.352666	0.333102	0.294478	0.4432	0.0986133	-1.32767	0.287107	Atp6v0d1	One sex_Male only
1003	ONLI_0121	gctof	3,6-anhydro-D-galactose	8.89981e-08	1	0.998452	0.981853	38	6	1.59353e-06	0.0532225	0.612783	0.000628649	0.084492	0.962309	3.12861e-06	1.80097	0.00181314	1.65473	0.000436804	1.97191	0.158952	0.0635007	2.4113	2.3579	2.48627	0.07045	-0.469156	0.118015	0.682848	-0.151967	0.815079	Atp6v0d1	Genotype effect with no sex effect(real)
1011	ONLI_0122	gctof	3-3-hydroxyphenylpropionic acid	2.04619e-06	1	0.978667	0.888647	40	6	0.0162207	0.0730271	0.023899	0.216918	0.112977	0.725242	0.0193928	-0.989068	0.126306	-0.956741	0.0678871	-1.02139	0.816851	0.669536	0.150783	0.119545	0.20675	0.101198	-0.495229	0.163283	0.405496	-0.559883	0.60594	Atp6v0d1	cannot classify
105	ONLI_0126	gctof	2-deoxytetronic acid	0.727885	1	0.902187	0.993475	37	5	0.909438	0.0422093	0.047862	0.985569	0.0694088	0.838379	0.912159	-0.0524089	0.0964906	-1.10754	0.365228	0.574555	0.746383	0.91549	0.9952	0.82592	1.09213	0.185125	0.404121	0.275591	0.128952	2.08621	0.329267	Atp6v0d1	Interaction_cannot classify2
108	ONLI_0155	CSHPOS	SM d38:1	0.256309	1	0.849099	0.966004	40	6	0.00794622	4.56504e-05	0.242975	0.143629	0.00013242	0.88761	0.0293215	0.925734	0.00780517	1.31457	0.3209	0.5369	0.293251	0.910756	1.20488	1.31537	1.11827	8.78734e-05	1.11255	0.000280697	0.573768	0.334877	0.747034	Atp6v0d1	Genotype effect with no sex effect(real)
132	ONLI_0181	CSHPOS	PC36:3 A	0.0218164	1	0.438565	0.930847	40	6	0.042286	1.22375e-10	0.57908	0.305436	1.07282e-09	0.949767	0.214205	-0.537369	0.0776766	-0.680647	0.330739	-0.394092	0.715428	0.911037	0.848653	0.820593	0.86513	6.85736e-09	1.45671	6.01162e-08	0.0195299	1.74326	0.189456	Atp6v0d1	Genotype effect with no sex effect(real)
135	ONLI_0184	CSHPOS	TAG 58:10; TAG 16:1-20:4-22:5;	0.052465	1	0.875999	0.871464	39	6	0.0196815	0.0445356	0.046493	0.244344	0.0723016	0.838379	0.198058	0.557316	0.500566	-0.431018	0.00674224	1.5551	0.997185	0.314657	1.15949	0.848309	1.51801	0.228112	-0.368597	0.326052	0.0762225	1.61752	0.258517	Atp6v0d1	One sex_Male only
1371	ONLI_0186	CSHPOS	PEo-36:3	0.02946	1	0.551756	0.990857	38	6	0.0329606	1.20715e-06	0.70043	0.281952	4.57906e-06	0.971246	0.117007	-0.676532	0.209665	-0.557717	0.115609	-0.795346	0.975897	0.776483	0.859799	0.922822	0.814173	1.67711e-06	1.27961	7.87642e-06	0.297772	1.04198	0.516356	Atp6v0d1	Genotype effect with no sex effect(real)
1451	ONLI_0194	CSHPOS	LPE18:2	0.32803	1	0.878744	0.972606	39	6	0.0317111	0.103802	0.0492679	0.281952	0.153084	0.838379	0.0368257	-0.889859	0.056217	-1.11918	0.290296	-0.650394	0.590568	0.892823	0.740993	0.676849	0.799428	0.210503	0.395455	0.306459	0.0735108	0.864244	0.258517	Atp6v0d1	cannot classify
1651	ONLI_0215	CSHPOS	SMd40:1	8.9901e-05	1	0.196924	0.191618	39	6	0.012912	5.44308e-12	0.724057	0.195915	1.22703e-10	0.97214	0.17838	0.582187	0.0544245	0.685136	0.15906	0.520034	0.588232	0.846984	1.1452	1.22393	1.13211	5.55758e-11	1.59103	9.01596e-09	0.0582385	1.42592	0.248806	Atp6v0d1	Genotype effect with no sex effect(real)
171	ONLI_0223	CSHPOS	TAG 49:4; TAG 15:2-16:0-18:2;	2.03016e-07	1	0.861236	0.985345	39	6	0.040052	3.47935e-09	0.191589	0.300495	2.19617e-08	0.88761	0.158076	0.61001	0.0201212	0.955331	0.611209	0.226533	0.383021	0.963121	1.37886	2.17395	1.22513	4.43431e-08	1.48811	3.12381e-07	0.118952	0.759314	0.312679	Atp6v0d1	Genotype effect with no sex effect(real)
1723	ONLI_0224	CSHPOS	PC16:0/9:0COOH	1.85492e-05	1	0.84359	0.727489	39	6	9.36278e-06	0.131885	0.577723	0.00171239	0.188851	0.949767	1.65032e-05	1.69511	0.00653526	1.51377	0.00086001	1.88405	0.286462	0.0848184	3.31666	2.97538	3.60334	0.269483	0.296287	0.370922	0.104191	0.666573	0.294232	Atp6v0d1	Genotype effect with no sex effect(real)
175	ONLI_0227	CSHPOS	LPC 20:4	0.839064	1	0.974728	0.986551	39	6	0.00596634	1.04903e-07	0.353944	0.120603	4.92671e-07	0.924949	0.0507886	-0.835186	0.0146444	-1.12611	0.210858	-0.578595	0.315768	0.854253	0.786736	0.76111	0.814734	4.12671e-07	-1.3391	2.26109e-06	0.328124	-0.791581	0.547336	Atp6v0d1	Genotype effect with no sex effect(real)
185	ONLI_0237	CSHPOS	TAG 60:11; TAG 18:1-20:4-22:6;	0.0264486	1	0.975905	0.895326	40	6	0.0297895	0.0166682	0.0266295	0.281952	0.0305842	0.778174	0.172213	-0.589518	0.0238328	-1.45517	0.604766	0.27613	0.393035	0.963121	0.834564	0.684288	1.01191	0.0168611	-0.723295	0.032848	0.218098	1.008	0.43345	Atp6v0d1	One sex_Female only
1862	ONLI_0238	CSHPOS	TAG 46:3; TAG 12:0-16:1-18:2;	0.000192788	1	0.787204	0.749018	30	6	0.0443292	0.00080203	0.977812	0.312284	0.00189462	0.992792	0.0492086	-0.852857	0.0557353	-0.734263	0.244597	-0.714773	0.590568	0.877215	0.699759	0.720265	0.79361	0.00182365	0.962547	0.00444092	0.401501	0.982037	0.603028	Atp6v0d1	Genotype effect with no sex effect(real)
1941	ONLI_0247	CSHPOS	Cer-NS d35:1; Cer-NS d18:1/17:0;	0.625445	1	0.922224	0.89191	37	6	0.00628915	0.00179167	0.380116	0.120603	0.00391586	0.924949	0.0148988	1.03054	0.232518	0.694587	0.00871761	1.30414	0.983072	0.314657	1.07899	1.06547	1.08667	0.00806776	0.768979	0.0166635	0.0953108	1.37854	0.284537	Atp6v0d1	Genotype effect with no sex effect(real)
2181	ONLI_0272	CSHPOS	PCp-32:0 or PC o-32:1	0.068707	1	0.963536	0.911792	40	6	0.0241441	0.000586889	0.858533	0.257428	0.00142918	0.97214	0.0553422	-0.819006	0.120758	-0.756056	0.138326	-0.881956	0.803578	0.809567	0.895119	0.929408	0.86624	0.000794396	0.939387	0.00211037	0.410083	0.813487	0.610076	Atp6v0d1	Genotype effect with no sex effect(real)
2281	ONLI_0283	CSHPOS	SMd32:1	0.393016	1	0.567421	0.791025	40	6	0.0217787	3.51276e-06	0.0131168	0.245477	1.24286e-05	0.528994	0.331073	0.421944	0.0112875	1.24191	0.43258	-0.398026	0.315768	0.956038	1.09564	1.24799	0.912955	0.000849387	-0.901052	0.00224888	0.00340586	-2.54099	0.189456	Atp6v0d1	One sex_Female only
232	ONLI_0287	CSHPOS	N-Octadecanoylsphing-4-enine-1-phosphocholine	0.000719947	1	0.692456	0.498111	40	6	0.0156345	4.66973e-09	0.163484	0.213352	2.85613e-08	0.88761	0.0998242	0.707266	0.0174458	1.09795	0.431996	0.316576	0.361737	0.956038	1.38216	1.51657	1.11812	8.86717e-07	-1.26109	4.48474e-06	0.00584094	-2.04247	0.189456	Atp6v0d1	Genotype effect with no sex effect(real)
233	ONLI_0288	CSHPOS	SMd36:1	0.000456661	1	0.4377	0.295885	40	6	0.0381514	1.6709e-12	0.10242	0.295112	1.22703e-10	0.88761	0.233614	0.515677	0.0101716	0.906778	0.74326	0.124575	0.308396	0.967418	1.28355	1.41371	1.0267	7.88753e-10	-1.44967	1.41438e-08	0.00822964	-2.23187	0.189456	Atp6v0d1	Genotype effect with no sex effect(real)
2341	ONLI_0289	CSHPOS	LPC 17:1	0.212947	1	0.994422	0.999705	40	6	0.0465814	2.97158e-09	0.951817	0.318807	1.91865e-08	0.990361	0.191967	-0.563978	0.167514	-0.580735	0.201084	-0.547221	0.911316	0.846984	0.830309	0.787443	0.856676	5.61464e-08	1.41369	3.85213e-07	0.0537862	1.44721	0.241121	Atp6v0d1	Genotype effect with no sex effect(real)
235	ONLI_0290	CSHPOS	SMd33:1	0.525678	1	0.99666	0.354778	38	6	0.000849963	1.21965e-10	0.615253	0.0515862	1.07282e-09	0.962309	0.0436715	0.862335	0.0145023	1.02635	0.045744	0.772397	0.315768	0.563938	1.15592	1.17569	1.14925	3.35731e-08	-1.40736	2.40811e-07	0.00805246	-1.66131	0.189456	Atp6v0d1	Genotype effect with no sex effect(real)
236	ONLI_0291	CSHPOS	LPC 22:6	0.0400618	1	0.833065	0.719694	37	6	0.0200457	0.000594649	0.0293419	0.244344	0.00144363	0.798302	0.149916	-0.623865	0.00215227	-1.45082	0.849065	0.115065	0.169814	0.974492	0.884637	0.759481	1.02207	0.000428347	-1.08569	0.00119422	0.456183	0.480199	0.64969	Atp6v0d1	One sex_Female only
2481	ONLI_0304	CSHPOS	TAG 60:1; TAG 18:1-20:0-22:0;	6.07879e-05	1	0.801145	0.897582	22	6	0.0212051	0.041407	0.022718	0.244797	0.0683476	0.71698	0.0278361	-0.966168	0.0594292	-0.925236	0.184724	-0.888656	0.601052	0.846984	0.52621	0.517512	0.570638	0.105333	0.651445	0.168503	0.339721	0.688026	0.556728	Atp6v0d1	cannot classify
2561	ONLI_0314	CSHPOS	CE (18:2)	0.0190674	1	0.955477	0.849842	36	6	0.0101478	7.02181e-06	0.0101942	0.166105	2.4193e-05	0.502699	0.226891	-0.526499	0.00403978	-1.39433	0.572257	0.293628	0.212492	0.963121	0.920322	0.739647	1.05235	0.00108853	0.85866	0.00278848	0.0338256	2.54662	0.226878	Atp6v0d1	One sex_Female only
2581	ONLI_0316	CSHPOS	SMd36:2	0.138375	1	0.999964	0.788136	38	6	0.0206288	1.66995e-09	0.178032	0.244344	1.12615e-08	0.88761	0.110259	0.688908	0.013836	1.01846	0.491352	0.2904	0.315768	0.963121	1.18427	1.24016	1.08392	3.4548e-07	-1.31021	1.94702e-06	0.0105456	-2.03826	0.189456	Atp6v0d1	Genotype effect with no sex effect(real)
2621	ONLI_0320	CSHPOS	PC36:4 A	0.245179	1	0.864131	0.989057	40	6	0.368772	7.79257e-07	0.0490647	0.76973	3.01389e-06	0.838379	0.503399	-0.291322	0.471162	0.330642	0.062988	-0.913286	0.997185	0.645423	0.918677	1.05212	0.819087	5.41008e-07	1.40655	2.92367e-06	0.801739	0.162624	0.895994	Atp6v0d1	Interaction_cannot classify2
2662	ONLI_0324	CSHPOS	PE 36:5e; PE 16:0e/20:5;	0.125495	1	0.472039	0.771599	39	6	0.00561128	0.00955349	0.753873	0.116508	0.0184748	0.97214	0.0139234	-1.03805	0.0375436	-0.934284	0.0825765	-1.16127	0.5271	0.696088	0.823288	0.838057	0.807702	0.00510814	0.758284	0.011042	0.653792	0.531301	0.796053	Atp6v0d1	Genotype effect with no sex effect(real)
2682	ONLI_0326	CSHPOS	TAG 44:1; TAG 12:0-16:0-16:1;	0.313894	1	0.985289	0.985541	24	6	0.00465785	0.00217021	0.485234	0.102085	0.00466567	0.942981	0.0148695	-1.05301	0.0178805	-1.25279	0.168315	-0.786607	0.361737	0.846984	0.703925	0.576958	0.818057	0.0235513	0.799436	0.0445612	0.0796297	1.26562	0.267352	Atp6v0d1	Genotype effect with no sex effect(real)
271	ONLI_0329	CSHPOS	TAG 56:8; TAG 16:1-18:1-22:6;	0.647348	1	0.998455	0.989241	39	6	0.246851	0.0105945	0.013284	0.688217	0.020289	0.528994	0.260394	0.488439	0.846867	-0.119515	0.0390892	1.11053	0.997185	0.550739	1.13526	0.987383	1.26773	0.0603542	0.551387	0.103072	0.0971271	1.78143	0.284906	Atp6v0d1	Interaction_One sex_Male only2
277	ONLI_0335	CSHPOS	LPC 22:1	0.00015809	1	0.182824	0.182824	40	6	0.0257594	3.19235e-12	0.450724	0.267423	1.22703e-10	0.942981	0.208903	-0.54353	0.324405	-0.365184	0.0431619	-0.721875	0.996274	0.563938	0.764134	0.883981	0.72264	1.23732e-10	1.6124	9.01596e-09	0.00890488	1.25571	0.189456	Atp6v0d1	Genotype effect with no sex effect(real)
2782	ONLI_0336	CSHPOS	SMd32:2	0.242562	1	0.282542	0.558914	23	6	0.003347	0.00507164	0.00912497	0.0860027	0.0102867	0.502699	0.34524	-0.428644	0.182855	0.924099	0.00361283	-1.63868	0.934655	0.203609	0.959764	1.16507	0.794361	0.0366909	0.656444	0.0657935	0.170063	-1.90634	0.379636	Atp6v0d1	One sex_Male only
283	ONLI_0341	CSHPOS	LPE 18:1	0.414293	1	0.592213	0.370083	39	6	0.000113536	0.111787	0.618759	0.0114277	0.16273	0.962309	0.00017566	-1.51327	0.00108112	-1.69159	0.0319644	-1.3436	0.115221	0.542081	0.69484	0.651612	0.733491	0.225899	0.337603	0.323475	0.23373	0.685596	0.454219	Atp6v0d1	Genotype effect with no sex effect(real)
285	ONLI_0343	CSHPOS	SMd42:1	0.00614194	1	0.5166	0.88681	40	6	0.0223814	0.00341757	0.98639	0.248718	0.00717145	0.993372	0.0440617	0.858739	0.0592035	0.864972	0.190393	0.852506	0.601052	0.846984	1.20505	1.17161	1.23255	0.00863071	0.801093	0.0176415	0.018691	0.788626	0.189456	Atp6v0d1	Genotype effect with no sex effect(real)
2961	ONLI_0354	CSHPOS	Heptadecasphing-4-enine	0.00124637	1	0.644104	0.978963	37	6	0.00233291	0.756075	0.21683	0.0707949	0.80568	0.88761	0.0031284	-1.22979	0.0261781	-1.69454	0.0349368	-0.759285	0.42152	0.542081	0.90487	0.863412	0.949118	0.489239	-0.212887	0.596435	0.188227	0.722364	0.39847	Atp6v0d1	Genotype effect with no sex effect(real)
307	ONLI_0366	CSHPOS	SMd34:1	0.515934	1	0.999358	0.965573	39	6	0.000478696	1.89686e-06	0.563146	0.0343356	6.99356e-06	0.946836	0.00747776	1.12189	0.0105535	1.31086	0.0360123	0.960475	0.308396	0.542081	1.17451	1.18759	1.1647	6.09356e-05	-1.07485	0.000204585	0.0268071	-1.42524	0.213644	Atp6v0d1	Genotype effect with no sex effect(real)
3201	ONLI_0381	CSHPOS	SMd41:1	0.0203553	1	0.838417	0.949661	39	6	0.000586388	8.76154e-08	0.173309	0.038555	4.21515e-07	0.88761	0.0135333	1.04205	0.000794161	1.44442	0.164669	0.668768	0.115221	0.846984	1.29184	1.42004	1.13928	8.55351e-06	-1.13446	3.35757e-05	0.0125284	-1.91012	0.189456	Atp6v0d1	Genotype effect with no sex effect(real)
3491	ONLI_0410	CSHPOS	N-Nervonoyl-D-erythro-sphingosylphosphorylcholine	0.215571	1	0.994373	0.834715	39	6	0.0152234	0.0435703	0.0147502	0.213352	0.0711739	0.528994	0.0183306	0.998467	0.136075	0.916734	0.0558712	1.06624	0.865831	0.608965	1.24377	1.25884	1.22654	0.069795	0.544422	0.117167	0.368182	0.693929	0.583493	Atp6v0d1	cannot classify
3601	ONLI_0421	CSHPOS	CE ( 24:1)	1.14621e-05	1	0.997186	0.993969	20	6	0.040382	0.156173	0.0924364	0.300495	0.220825	0.88761	0.051262	-0.871858	0.145843	-0.993441	0.243735	-0.707904	0.871393	0.877215	0.193854	0.369287	0.119056	0.312571	0.423722	0.422292	0.408042	0.709259	0.608593	Atp6v0d1	Genotype effect with no sex effect(real)
369	ONLI_0430	CSHPOS	TAG 58:9; TAG 18:2-18:2-22:5;	0.0449935	1	0.67473	0.365632	38	6	0.602199	0.0975688	0.0480502	0.900168	0.145474	0.838379	0.644225	0.20202	0.429614	-0.574749	0.0169579	1.01546	0.997185	0.393522	1.04909	0.84593	1.32023	0.0273101	-0.696824	0.0507004	0.333642	0.89339	0.551874	Atp6v0d1	Interaction_One sex_Male only2
3841	ONLI_0447	CSHPOS	LPE 16:0	0.738736	1	0.898391	0.915933	39	6	0.0191182	0.00909705	0.228172	0.243294	0.0177224	0.88761	0.0356652	-0.895131	0.00873986	-1.34962	0.469577	-0.45526	0.308396	0.962328	0.844484	0.74813	0.930296	0.045198	0.570107	0.0794237	0.163642	1.46447	0.372244	Atp6v0d1	Genotype effect with no sex effect(real)
385	ONLI_0448	CSHPOS	PC34:4	0.0117616	1	0.481933	0.979895	40	6	0.0486567	2.43766e-07	0.685324	0.321903	1.07448e-06	0.966458	0.155108	-0.613403	0.0963739	-0.736708	0.314118	-0.490098	0.746383	0.908566	0.80841	0.825214	0.797682	5.55326e-06	1.25372	2.25852e-05	0.0130365	1.50033	0.189456	Atp6v0d1	Genotype effect with no sex effect(real)
3952	ONLI_0458	CSHPOS	TAG 60:11; TAG 18:2-20:4-22:5;	0.0709282	1	0.924602	0.768097	39	6	0.0372565	0.0309243	0.307026	0.293954	0.0525847	0.902682	0.0561179	-0.81753	0.0435398	-1.21893	0.452419	-0.433745	0.553674	0.962328	0.808941	0.734614	0.893833	0.0181791	-0.687054	0.0352415	0.928335	0.0981324	0.954962	Atp6v0d1	Genotype effect with no sex effect(real)
3962	ONLI_0471	CSHNEG	FA 11:0	0.78889	1	0.989568	0.977182	39	6	1.49066e-06	0.801876	0.258427	0.000628649	0.845829	0.88761	2.8936e-06	-1.808	0.000770591	-2.17838	0.00173019	-1.44158	0.115221	0.129325	0.369109	0.303135	0.438061	0.55564	-0.154336	0.653354	0.0423914	0.58247	0.235396	Atp6v0d1	Genotype effect with no sex effect(real)
3972	ONLI_0473	CSHNEG	FA 13:0	0.0179207	1	0.800959	0.841336	37	6	0.00213131	0.607053	0.00427143	0.0707949	0.696169	0.448625	0.00287188	1.23958	0.405	0.554165	0.000162684	1.92414	0.997185	0.0427859	1.35426	1.09762	1.61475	0.914864	-0.0316064	0.944644	0.069527	1.33837	0.253967	Atp6v0d1	One sex_Male only
4003	ONLI_0476	CSHNEG	FA 15:0	0.631291	1	0.88233	0.912812	38	6	0.00129413	0.543071	0.00472822	0.0600631	0.637624	0.448625	0.00177791	1.29199	0.242289	0.74845	0.000654253	1.83553	0.983072	0.0737436	1.38767	1.18139	1.59519	0.922509	0.0289654	0.944921	0.040219	1.11605	0.235396	Atp6v0d1	One sex_Male only
4191	ONLI_0497	CSHNEG	FAHFA 24:0; FAHFA 16:0/8:0;	0.590847	1	0.772355	0.914093	37	6	0.00249269	0.726614	0.668687	0.0728419	0.786046	0.964346	0.00333086	-1.22255	0.0399275	-1.38416	0.0442891	-1.05719	0.533945	0.563938	0.651973	0.6038	0.704697	0.649664	-0.138406	0.73786	0.796358	0.188569	0.893779	Atp6v0d1	Genotype effect with no sex effect(real)
420	ONLI_0498	CSHNEG	LPE P-16:0	0.0136703	1	0.979205	0.862379	40	6	0.00194683	1.7455e-05	0.235084	0.0707949	5.46507e-05	0.88761	0.0121838	-1.05575	0.00298267	-1.43652	0.200295	-0.674979	0.19611	0.846984	0.795134	0.751296	0.830215	0.000477086	0.937609	0.00132542	0.0254986	1.69915	0.210834	Atp6v0d1	Genotype effect with no sex effect(real)
425	ONLI_0511	CSHNEG	LPC 18:1	0.266615	1	0.981089	0.978023	39	5	0.0293798	0.0190566	0.0874612	0.281952	0.0347244	0.88761	0.0343657	-0.975634	0.00372571	-1.87053	0.445421	-0.468683	0.20997	0.962328	0.692466	0.423145	0.815122	0.107992	0.47676	0.171786	0.0107468	1.87861	0.189456	Atp6v0d1	Genotype effect with no sex effect(real)
438	ONLI_0537	CSHNEG	Cer (d18:1(4E)/23:0)	0.0974985	1	0.986617	0.977724	40	6	0.0504701	0.255779	0.0365236	0.323747	0.342631	0.838379	0.0571447	0.813278	0.87288	0.0995982	0.00862601	1.52696	0.997185	0.314657	1.25706	0.980783	1.52275	0.650859	0.136467	0.73786	0.0509574	1.56383	0.241121	Atp6v0d1	Interaction_One sex_Male only2
4491	ONLI_0550	CSHNEG	PE 36:4e; PE 18:2e/18:2;	0.000687918	1	0.692813	0.971459	37	6	0.0239624	1.07539e-06	0.294485	0.257428	4.11495e-06	0.89313	0.092682	-0.725188	0.408192	-0.389884	0.0279257	-1.02411	0.997185	0.542081	0.714304	0.883637	0.62563	1.13613e-06	1.34598	5.63776e-06	0.375274	0.711751	0.588651	Atp6v0d1	Genotype effect with no sex effect(real)
4511	ONLI_0552	CSHNEG	PE 36:2e; PE 18:1e/18:1;	0.881412	1	0.999473	0.999949	35	6	0.000124706	1.46031e-07	0.818366	0.0114277	6.69873e-07	0.97214	0.00501882	-1.17573	0.0117145	-1.09481	0.00997012	-1.22119	0.315768	0.314657	0.769325	0.725897	0.808358	3.26925e-06	1.24105	1.41727e-05	0.100394	1.11467	0.29015	Atp6v0d1	Genotype effect with no sex effect(real)
4591	ONLI_0563	CSHNEG	SM d33:1; SM d17:1/16:0;	0.814892	1	0.964408	1	40	6	0.00641992	1.15842e-08	0.787797	0.120603	6.48224e-08	0.97214	0.0576476	0.811706	0.0389781	0.888626	0.110644	0.734786	0.530237	0.770022	1.15832	1.15295	1.16526	6.37298e-07	-1.30495	3.35219e-06	0.03884	-1.45879	0.235396	Atp6v0d1	Genotype effect with no sex effect(real)
4601	ONLI_0564	CSHNEG	PE 38:6e; PE 18:1e/20:5;	0.797787	1	0.950182	0.163287	36	6	0.00800973	0.000213613	0.0943576	0.143629	0.000559935	0.88761	0.043818	-0.864077	0.420196	-0.38258	0.00834903	-1.47992	0.997185	0.314657	0.833656	0.917785	0.747728	2.48938e-05	1.20913	8.96097e-05	0.895658	0.111789	0.942841	Atp6v0d1	Genotype effect with no sex effect(real)
463	ONLI_0567	CSHNEG	PE 38:4e; PE 18:0e/20:4;	0.372706	1	0.676012	0.741313	40	6	0.0280087	0.272095	0.102213	0.279732	0.361419	0.88761	0.032614	-0.908688	0.0842227	-0.837388	0.170312	-0.979989	0.715428	0.846984	0.819987	0.822721	0.817468	0.272074	0.330551	0.372684	0.836286	0.18795	0.911367	Atp6v0d1	Genotype effect with no sex effect(real)
466	ONLI_0570	CSHNEG	SM d34:1	0.658883	1	0.615908	0.728786	40	6	0.00218042	3.44366e-08	0.898451	0.0707949	1.81137e-07	0.983187	0.0283216	0.931225	0.0310787	0.968041	0.0523152	0.89441	0.462662	0.608965	1.14439	1.12688	1.16579	1.40737e-06	-1.26698	6.77084e-06	0.0441773	-1.34061	0.235482	Atp6v0d1	Genotype effect with no sex effect(real)
4721	ONLI_0576	CSHNEG	SM d35:1; SM d18:1/17:0;	0.674833	1	0.963253	0.997261	39	6	0.080477	3.45931e-07	0.0410602	0.404436	1.47171e-06	0.838379	0.220715	0.530752	0.890748	-0.0651343	0.00829152	1.16384	0.997185	0.314657	1.08054	1.00165	1.18441	3.31191e-07	-1.45089	1.87993e-06	0.482243	-0.221919	0.673433	Atp6v0d1	Interaction_One sex_Male only2
4792	ONLI_0583	CSHNEG	SM d36:2	0.0162219	1	0.445349	0.826732	37	6	0.000116008	4.05053e-13	0.809497	0.0114277	1.22703e-10	0.97214	0.043793	0.862987	0.00734478	0.978232	0.0142806	0.872292	0.289751	0.352106	1.4502	1.36607	1.81661	2.67681e-10	-1.53612	9.79104e-09	0.00910272	-1.64206	0.189456	Atp6v0d1	Genotype effect with no sex effect(real)
4881	ONLI_0594	CSHNEG	SM d38:1; SM d16:1/22:0;	0.00171634	1	0.975865	0.953211	37	6	0.00171702	0.0122454	0.277781	0.0677363	0.0232251	0.88761	0.00464165	1.18326	0.0142414	1.58009	0.0957056	0.806821	0.315768	0.723819	1.62798	1.98757	1.3812	0.00780294	0.754227	0.0162441	0.983844	-0.0190437	0.988857	Atp6v0d1	Genotype effect with no sex effect(real)
507	ONLI_0618	CSHNEG	HexCer-NS d40:2; HexCer-NS d18:1/22:1;	1.99289e-05	1	0.461862	0.999138	37	6	0.0143749	1.77436e-10	0.233062	0.206214	1.47365e-09	0.88761	0.119657	-0.672856	0.00954202	-0.958733	0.407352	-0.349548	0.308396	0.951022	0.646054	0.583203	0.678315	5.70017e-08	1.3849	3.8771e-07	0.00930866	1.99409	0.189456	Atp6v0d1	Genotype effect with no sex effect(real)
5151	ONLI_0629	CSHNEG	PC 36:0; PC 16:0-20:0;	1.15339e-07	1	0.635135	0.362932	31	6	0.035055	0.014638	0.0196686	0.291141	0.0272391	0.67472	0.271444	-0.485097	0.0477184	-1.35764	0.31964	0.467713	0.553674	0.910756	0.686129	0.414633	1.31624	0.0203998	-0.82944	0.0394497	0.0660153	0.995911	0.253911	Atp6v0d1	One sex_Female only
5231	ONLI_0641	CSHNEG	PI 36:3; PI 18:1-18:2;	0.020618	1	0.191618	0.196924	39	6	0.0378958	5.44308e-12	0.736401	0.295112	1.22703e-10	0.97214	0.260858	-0.487972	0.108693	-0.588176	0.243974	-0.427433	0.792526	0.877215	0.893107	0.873944	0.892935	1.33906e-10	1.547	9.01596e-09	0.0469275	1.70774	0.240427	Atp6v0d1	Genotype effect with no sex effect(real)
5241	ONLI_0643	CSHNEG	PC 37:1; PC 19:0-18:1;	0.0030557	1	0.182824	0.182824	40	6	0.773673	3.19235e-12	0.0403772	0.969176	1.22703e-10	0.838379	0.869017	0.0719678	0.115177	0.573244	0.244472	-0.429308	0.792526	0.877215	0.948558	1.23035	0.847606	3.70052e-11	1.69664	9.01596e-09	0.105753	0.694088	0.294839	Atp6v0d1	Interaction_cannot classify2
558	ONLI_0683	CSHNEG	PC 42:7; PC 20:1-22:6;	0.00106967	1	0.196924	0.191618	39	6	0.0398414	5.44308e-12	0.399268	0.300495	1.22703e-10	0.924949	0.227376	-0.523306	0.0472172	-0.704741	0.419154	-0.303182	0.553674	0.956038	0.844052	0.832207	0.862323	2.03166e-10	1.50887	9.01596e-09	0.0345062	1.91043	0.226878	Atp6v0d1	Genotype effect with no sex effect(real)
5621	ONLI_0705	HILICPOS	1-Methyl-L-histidine	0.491513	1	0.970174	0.785903	37	5	0.00348867	4.82258e-11	0.351786	0.0860176	5.21235e-10	0.924949	0.161964	0.656345	0.00597477	1.03788	0.272119	0.531094	0.2773	0.889417	1.234	1.54953	1.13188	1.76713e-09	1.57533	2.24882e-08	0.0935769	1.06854	0.283978	Atp6v0d1	Genotype effect with no sex effect(real)
5633	ONLI_0706	HILICPOS	2-Indolinone	0.000539617	1	0.999912	0.999994	40	6	0.00455719	9.34029e-06	0.120251	0.102085	3.13595e-05	0.88761	0.0282528	0.931609	0.381839	0.449841	0.00180301	1.41338	0.997185	0.129325	1.65687	1.32145	2.47282	1.90985e-06	-1.26883	8.8121e-06	0.692125	-0.30529	0.819579	Atp6v0d1	Genotype effect with no sex effect(real)
5681	ONLI_0712	HILICPOS	7-Keto-3a,12-a-dihydroxycholanic acid	1.42192e-05	1	0.514478	0.612856	23	6	1.08517e-05	3.43113e-05	0.00440383	0.00171239	0.000101392	0.448625	0.000464572	1.43423	0.000123172	1.93688	0.21478	0.417553	0.0971827	0.854253	2.50308	4.30767	1.22453	3.98775e-05	1.3136	0.000138605	0.711588	-0.205724	0.833984	Atp6v0d1	One sex_Female only
5711	ONLI_0720	HILICPOS	Arg-Ser	0.0106449	1	0.678233	0.841063	22	6	0.00337907	0.00134068	0.00206452	0.0860027	0.00303093	0.415823	0.24344	0.529807	0.00116827	1.67376	0.359436	-0.598819	0.115221	0.911881	1.2027	1.52513	0.878971	0.639555	-0.168625	0.730259	0.00668071	-2.44121	0.189456	Atp6v0d1	One sex_Female only
5721	ONLI_0722	HILICPOS	Arg-Val	0.000600219	1	0.368616	0.986073	32	5	0.224	0.000267347	0.0423194	0.653948	0.000684861	0.838379	0.136584	0.702867	0.706505	-0.188627	0.0368266	1.34388	0.997185	0.542081	1.45351	0.974353	2.07346	0.000237102	-1.23773	0.000695439	0.579781	0.294779	0.75238	Atp6v0d1	Interaction_One sex_Male only2
574	ONLI_0730	HILICPOS	Gluconolactone	0.914675	1	0.9807	0.911613	37	6	0.0545658	0.067203	0.0454055	0.344419	0.104789	0.838379	0.0620759	0.801486	0.0226587	1.15271	0.532235	0.416805	0.391772	0.963121	1.1577	1.22471	1.07891	0.187549	-0.412655	0.27815	0.185371	-1.14856	0.397439	Atp6v0d1	Interaction_One sex_Female only2
5773	ONLI_0733	HILICPOS	Glycerophosphocholine	0.207721	1	0.849342	0.836804	40	6	0.0103158	0.000106431	0.566171	0.166105	0.000291578	0.946836	0.0324029	-0.909738	0.0228409	-1.10563	0.211131	-0.713848	0.391772	0.854253	0.78369	0.757781	0.816856	0.00040527	-1.02209	0.0011444	0.273165	-0.630314	0.491109	Atp6v0d1	Genotype effect with no sex effect(real)
583	ONLI_0744	HILICPOS	Leu-Arg	0.110009	1	0.994374	0.986468	39	6	0.0389924	0.652945	0.181598	0.29869	0.730742	0.88761	0.0448275	0.856807	0.327615	0.598152	0.0768053	1.11051	0.996274	0.680892	1.16689	1.13831	1.19542	0.538913	-0.193079	0.6423	0.674043	0.319282	0.809886	Atp6v0d1	Genotype effect with no sex effect(real)
5911	ONLI_0753	HILICPOS	N.alpha.-Methyl-L-lysine	0.893839	1	0.972243	0.939547	39	6	0.0207491	0.316498	0.0908236	0.244344	0.409373	0.88761	0.0246035	0.954174	0.0810853	1.02577	0.166328	0.875851	0.715428	0.846984	1.19103	1.1951	1.18506	0.398361	-0.262211	0.505317	0.568166	-0.412133	0.745895	Atp6v0d1	Genotype effect with no sex effect(real)
594	ONLI_0757	HILICPOS	NEPSILON,NEPSILON,NEPSILON-TRIMETHYLLYSINE	0.000573293	1	0.824969	0.970427	36	6	0.0322717	0.723053	0.16559	0.281952	0.784957	0.88761	0.0378447	0.888722	0.374185	0.682791	0.00163191	1.11614	0.997185	0.129325	1.14575	1.08802	1.21983	0.562876	-0.193346	0.659895	0.676477	0.239999	0.809925	Atp6v0d1	Genotype effect with no sex effect(real)
6051	ONLI_0774	HILICPOS	Stearoyl-L-carnitine	0.0223613	1	0.623136	0.999876	37	6	0.865471	0.0151075	0.0287433	0.985569	0.0279807	0.798302	0.869399	0.0721459	0.264939	0.777357	0.157625	-0.592139	0.983072	0.846984	1.00283	1.11589	0.885504	0.118364	-0.504753	0.186034	0.00494376	-1.87425	0.189456	Atp6v0d1	Interaction_cannot classify2
6213	ONLI_0802	HILICPOS	Cytosine	0.0212995	1	0.696962	0.424597	39	6	0.000338378	0.0275942	0.033678	0.026698	0.0479555	0.838379	0.00139618	1.31716	0.344335	0.567086	9.42114e-05	2.083	0.997185	0.0371664	1.65329	1.21073	2.25669	0.0334335	-0.614812	0.0612043	0.0258979	0.901097	0.210834	Atp6v0d1	One sex_Male only
624	ONLI_0808	HILICPOS	N-Acetyl-5-hydroxytryptamine	8.77962e-06	1	0.972905	0.859112	34	5	0.0425829	0.631304	0.20587	0.305436	0.71566	0.88761	0.049772	-0.913105	0.110734	-1.03705	0.283937	-0.764549	0.792526	0.892823	0.535434	0.625837	0.370501	0.513416	-0.211735	0.621462	0.959976	0.0607687	0.976875	Atp6v0d1	Genotype effect with no sex effect(real)
6251	ONLI_0809	HILICPOS	N-Acetylcytidine	0.0331782	1	0.88022	0.869227	40	6	0.0536384	2.47503e-06	0.0212348	0.341296	8.95778e-06	0.698096	0.56576	0.2502	0.272389	-0.50735	0.0542483	1.00775	0.983072	0.608965	1.07362	0.883902	1.35901	2.77792e-06	-1.35628	1.23829e-05	0.755312	0.158816	0.862432	Atp6v0d1	Interaction_cannot classify2
6261	ONLI_0810	HILICPOS	N-Acetylglucosamine	0.20266	1	0.865249	0.999263	38	6	0.000130355	0.00814515	0.186304	0.0114277	0.0160262	0.88761	0.000453184	1.42889	0.00278638	1.85224	0.0343374	0.965405	0.19611	0.542081	1.51634	1.87245	1.23391	0.00577558	0.762562	0.012217	0.844955	-0.124274	0.917015	Atp6v0d1	Genotype effect with no sex effect(real)
628	ONLI_0812	HILICPOS	N-Methylleucine	1.3363e-06	1	0.893131	0.993117	39	6	0.0329388	0.665816	0.140963	0.281952	0.73927	0.88761	0.0381806	-0.883874	0.283	-0.551335	0.0828653	-1.21747	0.983072	0.696088	0.239824	0.267279	0.213882	0.896263	-0.0410577	0.932917	0.304094	-0.707189	0.521587	Atp6v0d1	Genotype effect with no sex effect(real)
6321	ONLI_0816	HILICPOS	1-Methylnicotinamide	0.00122322	1	0.339436	0.739057	37	6	0.0312944	0.000514973	0.166951	0.281952	0.00127241	0.88761	0.0558729	-0.820489	0.0474634	-1.26168	0.45885	-0.293883	0.553674	0.962328	0.60929	0.500455	0.845332	0.000580287	-1.0534	0.00160086	0.878816	-0.0856029	0.931886	Atp6v0d1	Genotype effect with no sex effect(real)
634	ONLI_0819	HILICPOS	4-Acetamidobutyric acid	0.0136442	1	0.95937	0.560464	40	5	0.00619711	0.03444	0.00956163	0.120603	0.0578153	0.502699	0.0718182	-0.835415	0.00942269	-1.7637	0.42276	0.48634	0.308396	0.956038	0.859182	0.676213	1.1395	0.335477	-0.28267	0.445609	0.0688731	1.96737	0.253929	Atp6v0d1	One sex_Female only
6373	ONLI_0822	HILICPOS	5'-Methylthioadenosine	0.0731418	1	0.842566	0.494731	37	6	8.58635e-06	0.190048	0.74676	0.00171239	0.264925	0.97214	1.56097e-05	1.69672	0.0141871	1.5785	4.99692e-05	1.79265	0.315768	0.0371664	1.72542	1.59909	1.8312	0.315968	0.275017	0.425424	0.26447	0.489166	0.484147	Atp6v0d1	Genotype effect with no sex effect(real)
6382	ONLI_0823	HILICPOS	6-Methyladenosine	0.0125522	1	0.978485	0.991703	39	6	0.00899801	0.851688	0.0599741	0.157765	0.888864	0.88761	0.011123	1.0692	0.236162	0.775668	0.0165894	1.3595	0.983072	0.393522	1.57187	1.40279	1.74727	0.679775	-0.12557	0.759829	0.55222	0.458266	0.729818	Atp6v0d1	Genotype effect with no sex effect(real)
6472	ONLI_0838	HILICPOS	Biliverdin	1.81251e-05	1	0.971874	0.954611	38	6	0.00148911	0.0019015	0.477681	0.0618371	0.00413302	0.942981	0.00751689	1.12214	0.0910814	0.902675	0.0109752	1.38415	0.733298	0.333055	2.08355	1.51914	2.46053	0.00536695	0.80849	0.0115382	0.0178197	1.28996	0.189456	Atp6v0d1	Genotype effect with no sex effect(real)
667	ONLI_0862	HILICPOS	Histidine	0.852311	1	0.640467	0.702283	38	6	0.406327	0.015978	0.0138937	0.801481	0.0293862	0.528994	0.419969	-0.351874	0.0691883	-1.12307	0.417904	0.443707	0.665727	0.956038	0.959557	0.862298	1.05371	0.125595	0.46332	0.194685	0.0375058	2.0301	0.235396	Atp6v0d1	Interaction_cannot classify2
6702	ONLI_0866	HILICPOS	Kynurenine	0.0116238	1	0.98707	0.765674	40	6	0.714152	1.89532e-10	0.0457059	0.955027	1.55771e-09	0.838379	0.818805	0.0999605	0.286128	-0.433317	0.107662	0.633238	0.983072	0.768178	0.999164	0.845727	1.28845	5.96898e-10	-1.62358	1.27172e-08	0.330556	-0.557021	0.549181	Atp6v0d1	Interaction_cannot classify2
6771	ONLI_0877	HILICPOS	Nicotinamide	0.0382893	1	0.99881	0.948816	40	6	0.00512515	0.800846	0.455627	0.10929	0.845829	0.942981	0.00648393	-1.13928	0.0212004	-1.42903	0.152612	-0.849525	0.389002	0.842032	0.575169	0.522391	0.629873	0.636032	-0.141798	0.727289	0.528072	0.437707	0.71222	Atp6v0d1	Genotype effect with no sex effect(real)
6853	ONLI_0887	HILICPOS	Propionylcarnitine	0.117731	1	0.520331	0.845013	39	6	0.0489587	0.201436	0.127385	0.321903	0.27932	0.88761	0.0556682	0.818966	0.225966	0.697519	0.148516	0.93036	0.983072	0.83106	1.15139	1.14198	1.15922	0.22415	-0.392062	0.32214	0.712428	-0.159221	0.833984	Atp6v0d1	Genotype effect with no sex effect(real)
6871	ONLI_0889	HILICPOS	S-Adenosyl-homocysteine	5.52984e-05	1	0.767526	0.916127	32	6	0.0302037	0.0297576	0.0709163	0.281952	0.0509301	0.88761	0.96861	-0.0174642	0.0868514	-1.10149	0.0750342	1.06657	0.728998	0.677728	1.03468	0.439881	1.8161	0.24259	-0.397762	0.343016	0.0559146	1.7703	0.243879	Atp6v0d1	Genotype effect with no sex effect(real)
6971	ONLI_0917	HILICNEG	2-Hydroxy-3-methylbutyric acid	0.660436	1	0.713895	0.977394	34	6	0.0437228	1.32274e-05	0.336793	0.310786	4.20822e-05	0.920069	0.127143	0.663277	0.436898	0.357138	0.0656272	0.969416	0.997185	0.663845	1.14491	1.05839	1.25976	2.3695e-05	-1.27881	8.61537e-05	0.337904	-0.666533	0.556589	Atp6v0d1	Genotype effect with no sex effect(real)
6981	ONLI_0918	HILICNEG	2-Hydroxy-4-methylpentanoic acid	0.00417325	1	0.61461	0.161633	36	6	0.00288048	6.44183e-06	0.794897	0.0783688	2.24894e-05	0.97214	0.0325293	0.913493	0.0122711	0.868299	0.0720427	1.02483	0.315768	0.676687	1.60172	1.9279	1.54511	2.92541e-05	1.19055	0.000103043	0.0277532	1.34708	0.214679	Atp6v0d1	Genotype effect with no sex effect(real)
7011	ONLI_0923	HILICNEG	3-Hydroxy-4-methoxybenzoic acid	0.000297836	1	0.991185	0.899753	38	6	0.042352	0.0224547	0.532617	0.305436	0.040174	0.944736	0.0700382	0.778091	0.397758	0.55884	0.0347184	1.03539	0.997185	0.542081	1.47606	1.31735	1.79271	0.0221449	-0.722915	0.0424086	0.684976	-0.246365	0.815152	Atp6v0d1	Genotype effect with no sex effect(real)
703	ONLI_0928	HILICNEG	3-Methylhistidine	0.307862	1	0.991994	0.996162	34	5	0.0214081	0.40829	0.244281	0.244797	0.504545	0.88761	0.0260127	1.02835	0.028152	1.59576	0.340453	0.589598	0.435528	0.911037	1.29489	1.52584	1.13322	0.276668	0.362835	0.377666	0.279317	-0.643325	0.495691	Atp6v0d1	Genotype effect with no sex effect(real)
7071	ONLI_0934	HILICNEG	4-Methylcatechol	7.67829e-10	1	0.759488	0.746394	36	5	0.0128266	0.598051	0.0441806	0.195915	0.687846	0.838379	0.0158747	1.10585	0.000973066	2.12321	0.522551	0.418796	0.115221	0.963121	2.39024	4.45607	1.08152	0.865914	0.0528365	0.911177	0.00271822	-1.65158	0.189456	Atp6v0d1	One sex_Female only
715	ONLI_0966	HILICNEG	Ferulic acid	0.339515	1	0.988121	0.944414	36	6	0.0407515	0.590527	0.177533	0.300495	0.683909	0.88761	0.0472108	-0.851275	0.296795	-0.609454	0.0935201	-1.09877	0.985248	0.723406	0.578493	0.711333	0.444962	0.757735	-0.102088	0.825764	0.369849	-0.591401	0.583622	Atp6v0d1	Genotype effect with no sex effect(real)
721	ONLI_0993	HILICNEG	Homovanillic acid	0.00793558	1	0.983484	0.708386	29	5	0.0295505	0.290696	0.25458	0.281952	0.382265	0.88761	0.0361836	0.978134	0.0528202	1.60195	0.226105	0.619387	0.584012	0.861815	1.66516	2.1673	1.37865	0.608761	-0.184085	0.702211	0.161694	-1.16665	0.371944	Atp6v0d1	Genotype effect with no sex effect(real)
724	ONLI_1001	HILICNEG	Kynurenic acid	0.502578	1	0.9963	0.999682	36	5	0.027305	0.352066	0.125908	0.279732	0.448757	0.88761	0.032435	0.988546	0.269301	0.766574	0.0900956	1.10344	0.983072	0.713213	1.53643	1.35189	1.62854	0.532925	0.198549	0.639996	0.593501	0.535412	0.755562	Atp6v0d1	Genotype effect with no sex effect(real)
725	ONLI_1010	HILICNEG	Mannitol	0.425248	1	0.786136	0.323919	33	6	0.0468714	0.0393071	0.090431	0.318807	0.065154	0.88761	0.9315	-0.038051	0.190722	0.968314	0.0211944	-1.05949	0.934655	0.448303	1.02024	1.23268	0.820428	0.128036	0.497577	0.197692	0.165244	-1.53023	0.374077	Atp6v0d1	Genotype effect with no sex effect(real)
728	ONLI_1017	HILICNEG	N-Acetyl-L-tyrosine	0.0130223	1	0.997795	0.929699	36	6	0.393872	0.0620304	0.0473393	0.782783	0.0976886	0.838379	0.408298	0.362045	0.0835636	1.12127	0.468799	-0.39718	0.715428	0.962328	1.27496	1.61564	0.863484	0.309544	-0.32869	0.41892	0.0199371	-1.84714	0.189456	Atp6v0d1	Interaction_cannot classify2
730	ONLI_1022	HILICNEG	N-Isovalerylglycine	0.183728	1	0.726815	0.980378	38	6	0.030209	0.0246963	0.0131823	0.281952	0.0434483	0.528994	0.0352865	0.897949	0.18397	0.660163	0.0853189	1.13573	0.934655	0.708596	1.63477	1.48061	1.74488	0.0567591	0.57262	0.0975663	0.235034	1.04819	0.455631	Atp6v0d1	cannot classify
733	ONLI_1031	HILICNEG	Phenylpyruvic acid	6.2763e-05	1	0.675147	0.572007	37	6	0.036108	0.685798	0.142225	0.293	0.753614	0.88761	0.0419456	-0.870226	0.451646	-0.500132	0.0308463	-1.2409	0.997185	0.542081	0.582786	0.707506	0.440331	0.94458	-0.0215569	0.960232	0.442648	-0.762326	0.636155	Atp6v0d1	Genotype effect with no sex effect(real)
7371	ONLI_1047	HILICNEG	Theophylline	0.0153266	1	0.226411	0.614819	26	6	0.0453816	0.0262129	0.0634038	0.316868	0.045858	0.88761	0.997967	0.00115199	0.0127916	1.0178	0.172109	-1.01063	0.315768	0.846984	1.03892	1.53626	0.626942	0.93298	0.0316419	0.951061	0.0323686	-1.99678	0.224025	Atp6v0d1	Genotype effect with no sex effect(real)
7441	ONLI_1065	BileAcid_Steroids	progesterone	0.0004168	1	0.943849	0.533722	20	5	0.00373979	0.0482389	0.0393089	0.089415	0.0773587	0.838379	0.00357436	-1.32914	0.00365815	-1.981	0.333095	-0.506863	0.20997	0.911037	0.493358	0.298425	1.08825	0.00897298	-0.930486	0.0182466	0.585934	0.543654	0.755396	Atp6v0d1	One sex_Female only
8041	ONLI_1165	Oxylipins	9-HETE	0.204115	0.999996	0.974966	0.879025	34	6	0.0246576	0.0425019	0.00933665	0.259398	0.0697172	0.502699	0.0295829	-0.930208	0.482929	-0.350895	0.0318301	-1.46122	0.997185	0.542081	0.74521	0.923475	0.559619	0.199061	-0.410591	0.291932	0.0433842	-1.52091	0.235396	Atp6v0d1	One sex_Male only
8122	ONLI_1174	Oxylipins	13-KODE	0.0217267	1	0.538759	0.956942	18	5	0.0118312	0.790457	0.0760223	0.186697	0.838267	0.88761	0.0174343	-1.12485	0.210269	-0.766919	0.0708113	-1.38027	0.975897	0.676225	0.555355	0.640663	0.497169	0.826701	0.100836	0.880253	0.250599	-0.512519	0.472953	Atp6v0d1	Genotype effect with no sex effect(real)
8202	ONLI_1182	Oxylipins	15,16-EpODE	0.90015	1	0.817907	0.721918	39	5	0.0276728	0.683734	0.0799648	0.279732	0.753444	0.88761	0.0324663	0.985388	0.645476	0.362153	0.00994064	1.45432	0.997185	0.314657	1.36234	1.14048	1.55035	0.355514	-0.2842	0.465175	0.368734	0.807965	0.583493	Atp6v0d1	Genotype effect with no sex effect(real)
123	ONLI_0015	gctof	threonic acid	0.270691	1	0.264614	0.646098	38	5	0.0246211	0.0866708	0.0457748	0.127641	0.128136	0.312132	0.0291683	1.005	0.0785272	1.08021	0.177835	0.894727	0.361141	0.68358	1.29242	1.31109	1.26169	0.125326	0.489717	0.194787	0.30197	0.304236	0.466573	C8a	cannot classify
133	ONLI_0017	gctof	sulfuric acid	0.000308822	1	0.981194	0.995577	38	6	0.0300885	0.820979	0.093236	0.143696	0.863727	0.408166	0.0351528	0.89857	0.559908	0.385731	0.0125778	1.41141	0.776774	0.29151	1.90357	1.24408	2.71124	0.498061	-0.205918	0.609429	0.40744	0.819761	0.564476	C8a	Genotype effect with no sex effect(real)
177	ONLI_0022	gctof	saccharic acid	0.000188881	1	0.991105	0.890004	36	5	0.000564186	0.165978	0.18969	0.0158778	0.227361	0.541463	0.000831313	1.48189	0.00339808	2.05197	0.0735358	1.02191	0.0686586	0.522038	1.66623	2.08243	1.38872	0.10606	0.47959	0.168499	0.297011	-0.550474	0.460718	C8a	Genotype effect with no sex effect(real)
19	ONLI_0024	gctof	ribonic acid	0.226167	1	0.997956	0.989436	40	6	0.0104803	0.148059	0.373373	0.0842704	0.205406	0.687425	0.0127998	1.0489	0.0307397	1.39139	0.19777	0.706406	0.214362	0.721496	1.28274	1.37649	1.17994	0.339227	-0.291434	0.447524	0.052642	-0.976419	0.14868	C8a	Genotype effect with no sex effect(real)
245	ONLI_0030	gctof	pinitol	0.0424653	1	0.686504	0.737969	39	6	0.000321599	0.144662	0.837756	0.0125667	0.201469	0.916119	0.000471384	1.425	0.0255351	1.35629	0.00662179	1.50346	0.191098	0.239433	1.66987	1.62822	1.72746	0.1812	-0.380428	0.268393	0.713864	-0.233262	0.811725	C8a	Genotype effect with no sex effect(real)
253	ONLI_0031	gctof	pimelic acid	0.380119	1	0.988209	0.822018	38	6	0.0034305	0.107029	0.0346764	0.048272	0.153622	0.307022	0.0108317	1.07372	0.00193337	1.89054	0.645904	0.26986	0.0594377	0.916568	1.33217	1.62629	1.07386	0.404833	0.246127	0.511231	0.114462	-1.37455	0.236115	C8a	One sex_Female only
27	ONLI_0033	gctof	phenylethylamine	1.07786e-06	1	0.977088	0.559885	40	5	0.0207045	0.0892363	0.0715772	0.117375	0.131191	0.37278	0.0245531	1.03244	0.0146557	1.96896	0.358409	0.457147	0.162657	0.834426	2.86126	4.46521	1.54084	0.306042	-0.294332	0.413526	0.101647	-1.80614	0.217657	C8a	Genotype effect with no sex effect(real)
421	ONLI_0052	gctof	lyxose	0.000131064	1	0.972075	0.984049	37	6	0.0487985	0.0274783	0.0647082	0.190363	0.0456812	0.366835	0.830699	-0.0938039	0.121672	-1.07886	0.0704529	0.9074	0.418676	0.516364	0.931513	0.492881	1.6695	0.0536322	-0.597555	0.0928839	0.205485	1.3887	0.351241	C8a	Genotype effect with no sex effect(real)
501	ONLI_0062	gctof	isohexonic acid	0.00131562	1	0.996155	0.95541	39	5	0.0133021	0.0459195	0.143982	0.0995626	0.0713699	0.495447	0.0162528	1.0997	0.00734643	1.76515	0.357218	0.559426	0.101885	0.834426	1.41137	1.93847	1.09358	0.0294273	0.665169	0.0544336	0.0844856	-0.540552	0.194663	C8a	Genotype effect with no sex effect(real)
51	ONLI_0063	gctof	isocitric acid	0.845011	1	0.99912	0.999965	38	6	0.00161623	0.42839	0.244193	0.0310632	0.515377	0.576371	0.00219469	1.269	0.00387027	1.705	0.165354	0.833004	0.0726136	0.68358	1.32202	1.44773	1.19412	0.773892	-0.0868926	0.839982	0.0433365	-0.958888	0.135106	C8a	Genotype effect with no sex effect(real)
535	ONLI_0065	gctof	indoxyl sulfate	0.000154635	1	0.391907	0.213393	39	5	0.000287436	0.00439846	0.0150053	0.011921	0.00868668	0.213393	0.00206446	1.37947	0.326736	0.568965	7.72918e-05	2.42781	0.637297	0.030453	2.09051	1.31561	3.81401	0.00616672	-0.768109	0.0130278	0.0534476	1.09074	0.14935	C8a	One sex_Male only
544	ONLI_0066	gctof	indole-3-propionic acid	0.0848273	1	0.635451	0.666596	38	6	0.0213271	0.00569968	0.0345937	0.119411	0.0109813	0.307022	0.110116	0.689177	0.0239948	1.4963	0.836577	-0.0944203	0.189028	0.973468	1.4638	1.77481	1.08231	0.109153	-0.447076	0.173064	0.0985749	-2.0378	0.213398	C8a	One sex_Female only
58	ONLI_0070	gctof	hydroxycarbamate NIST	0.473703	1	0.994337	0.999792	40	6	0.0439777	0.772661	0.195591	0.178631	0.826128	0.541463	0.0501187	-0.8365	0.118111	-1.13539	0.272177	-0.537614	0.417552	0.771495	0.708521	0.653309	0.767327	0.590838	-0.16053	0.687711	0.677935	0.437241	0.786764	C8a	Genotype effect with no sex effect(real)
59	ONLI_0071	gctof	hydrocinnamic acid	0.0265004	1	0.888427	0.997621	40	6	0.0271369	0.193149	0.112236	0.134949	0.261515	0.447808	0.0316469	0.913542	0.00295471	1.53268	0.661627	0.294399	0.0638534	0.922527	1.47051	1.81146	1.20509	0.0991988	0.511121	0.159854	0.105094	-0.727166	0.223219	C8a	Genotype effect with no sex effect(real)
603	ONLI_0072	gctof	hippuric acid	1.75086e-05	1	0.806494	0.694557	40	6	0.00160263	0.795144	0.388338	0.0310632	0.844439	0.695231	0.00214846	1.27002	0.0267052	1.59705	0.035149	0.942992	0.191473	0.407315	2.61336	3.22425	2.09364	0.611252	0.151902	0.706256	0.249343	-0.502151	0.404451	C8a	Genotype effect with no sex effect(real)
666	ONLI_0079	gctof	glycine	0.607425	1	0.894505	0.927157	40	6	0.925276	0.00983495	0.0427362	0.966269	0.0182033	0.311763	0.927327	-0.0398092	0.314974	-0.517732	0.500308	0.438114	0.627623	0.872391	0.995983	0.908998	1.07466	0.0380531	0.587472	0.0681496	0.247719	1.54332	0.403311	C8a	Interaction_cannot classify2
699	ONLI_0082	gctof	glycerol	0.491364	1	0.954486	0.968441	39	6	0.00736687	0.419069	0.0467406	0.0688888	0.50726	0.312132	0.0091987	1.09477	0.133503	0.996754	0.0306356	1.18633	0.434712	0.391746	1.25093	1.23992	1.26073	0.402444	-0.251471	0.510152	0.940314	-0.0618918	0.966485	C8a	One sex_Male only
742	ONLI_0089	gctof	fucose	0.409923	1	0.968425	0.999373	40	6	0.00373821	0.686195	0.0321865	0.0494554	0.752047	0.299414	0.0048039	1.17656	0.0862824	1.00855	0.0309567	1.34457	0.379835	0.391746	1.40323	1.34288	1.46215	0.811734	0.0715808	0.869085	0.506103	0.407595	0.647417	C8a	One sex_Male only
811	ONLI_0096	gctof	cysteine	3.03507e-05	1	0.92141	0.997402	39	6	0.000225585	0.661365	0.50858	0.0111101	0.732057	0.776669	0.000336786	1.45602	0.00237072	1.69864	0.0480646	1.21783	0.0594377	0.47943	3.42896	4.57525	2.65537	0.542338	0.172851	0.645562	0.645995	-0.307956	0.757506	C8a	Genotype effect with no sex effect(real)
83	ONLI_0100	gctof	citric acid	0.272624	1	0.998454	0.999996	38	6	0.0172657	0.815761	0.122113	0.110612	0.860535	0.46094	0.0207445	0.981145	0.0571555	1.08063	0.184491	0.881658	0.304314	0.702313	1.23745	1.28772	1.18749	0.897644	-0.0408784	0.929492	0.707231	-0.239853	0.80885	C8a	Genotype effect with no sex effect(real)
84	ONLI_0101	gctof	catechol	0.469861	1	0.868647	0.9988	39	4	0.0155509	0.838828	0.0628803	0.107492	0.877817	0.361676	0.0188664	1.18857	0.383998	0.627908	0.0187195	1.74516	0.692426	0.343046	1.38307	1.15638	1.62284	0.601706	-0.158888	0.697271	0.333243	0.958366	0.495876	C8a	Genotype effect with no sex effect(real)
861	ONLI_0103	gctof	capric acid	0.131002	1	0.967034	0.819351	37	6	0.0326046	0.0374573	0.0550496	0.149375	0.0598708	0.341567	0.324471	0.429801	0.39789	-0.542793	0.0144972	1.40292	0.699013	0.30875	1.07262	0.897631	1.24592	0.951568	-0.0193353	0.963799	0.0168155	1.92638	0.0920181	C8a	Genotype effect with no sex effect(real)
873	ONLI_0104	gctof	beta-alanine	0.232527	1	0.750496	0.816351	37	6	0.00100734	0.0369976	0.987965	0.0247078	0.0594982	0.996937	0.00141304	-1.31703	0.0269714	-1.33323	0.0136124	-1.344	0.191473	0.29796	0.635104	0.611772	0.649387	0.0711383	0.532486	0.11978	0.41496	0.521709	0.570661	C8a	Genotype effect with no sex effect(real)
891	ONLI_0109	gctof	aminomalonate	6.47671e-07	0.581535	0.993087	0.250512	36	6	0.0150127	0.928046	0.107996	0.10469	0.946024	0.441266	0.0183318	-0.978581	0.053013	-0.822673	0.120391	-1.13131	0.292128	0.601442	0.314395	0.438843	0.237967	0.861428	0.0572266	0.905074	0.183625	-0.25141	0.326497	C8a	Genotype effect with no sex effect(real)
922	ONLI_0113	gctof	alanine	0.251619	1	0.991862	0.99508	36	6	0.0386663	0.502476	0.189142	0.167226	0.584862	0.541463	0.0449176	0.859842	0.176501	0.858807	0.158203	0.860878	0.484608	0.68358	1.14217	1.16957	1.1161	0.536467	0.19932	0.641481	0.814886	0.201391	0.888147	C8a	Genotype effect with no sex effect(real)
993	ONLI_0120	gctof	3-aminoisobutyric acid	0.687894	1	0.997721	0.99339	39	6	0.00385936	0.111766	0.404232	0.0498553	0.15984	0.706286	0.00497918	-1.17293	0.00818942	-1.48157	0.165758	-0.855842	0.107	0.68358	0.560749	0.411081	0.694774	0.266919	0.329532	0.368357	0.160875	0.955257	0.296885	C8a	Genotype effect with no sex effect(real)
1004	ONLI_0121	gctof	3,6-anhydro-D-galactose	2.3578e-08	1	0.995736	0.930583	38	6	1.59353e-06	0.0266562	0.851267	0.000453279	0.0445022	0.918032	3.12861e-06	1.80097	0.000513432	1.87137	0.00120493	1.75527	0.0518433	0.123048	2.52708	2.86397	2.1658	0.07045	-0.469156	0.119004	0.0423115	-0.585253	0.134441	C8a	Genotype effect with no sex effect(real)
1031	ONLI_0124	gctof	2-hydroxyglutaric acid	0.157785	1	0.998099	0.869145	40	6	9.1907e-05	0.51236	0.609929	0.00782079	0.593735	0.824397	0.000142385	1.53041	0.00682197	1.71259	0.0106287	1.34823	0.101698	0.261731	1.69978	1.77499	1.62918	0.460972	0.205698	0.572943	0.769247	-0.158657	0.853756	C8a	Genotype effect with no sex effect(real)
1051	ONLI_0126	gctof	2-deoxytetronic acid	0.831344	1	0.929069	0.997267	37	6	0.0216698	0.15383	0.0564312	0.119411	0.21229	0.3444	0.0258415	0.948715	0.119755	0.870263	0.118913	1.01664	0.417552	0.601442	1.12952	1.11914	1.13774	0.216732	0.38956	0.313942	0.474096	0.535936	0.623421	C8a	Genotype effect with no sex effect(real)
1081	ONLI_0155	CSHPOS	SM d38:1	0.131048	1	0.991477	0.990265	40	6	0.214478	1.66622e-06	0.043579	0.512148	5.7587e-06	0.311763	0.345273	-0.409848	0.0237086	-1.05623	0.635774	0.236531	0.189028	0.916568	0.944353	0.796783	1.06003	0.000109196	1.03425	0.000345569	0.0123331	2.32701	0.0871951	C8a	Interaction_One sex_Female only2
116	ONLI_0163	CSHPOS	9-HODE cholesteryl ester	0.00478491	1	0.998359	0.923895	27	5	0.0272296	0.031035	0.0638264	0.134949	0.0508432	0.364458	0.585367	0.264534	0.209179	-1.14546	0.020927	1.21012	0.537902	0.366455	1.09308	0.774298	1.33558	0.236348	-0.452614	0.335571	0.0255252	1.90297	0.112368	C8a	Genotype effect with no sex effect(real)
118	ONLI_0165	CSHPOS	SM d42:4; SM d14:2/28:2;	0.869117	1	0.999992	0.991944	40	6	0.0180814	0.00106671	0.698075	0.113985	0.00234795	0.868962	0.0420385	-0.866723	0.0553472	-1.00454	0.20244	-0.728905	0.300784	0.72996	0.842642	0.830207	0.857174	0.00190497	-0.919634	0.00466185	0.249871	-0.643998	0.404451	C8a	Genotype effect with no sex effect(real)
119	ONLI_0167	CSHPOS	PC 38:4; PC 18:0-20:4;	0.257782	1	0.394291	0.35389	40	5	0.00455067	0.00312573	0.0256996	0.0551681	0.00628335	0.270017	0.0402331	-0.946598	0.00303565	-1.75305	0.944454	0.0447225	0.0638534	0.990802	0.78569	0.648101	0.994153	0.00307361	-0.873438	0.00700001	0.1131	0.924336	0.234534	C8a	One sex_Female only
120	ONLI_0168	CSHPOS	PC36:1	0.000143236	1	0.862099	0.996373	39	6	0.027013	2.71882e-09	0.00840163	0.134949	1.72777e-08	0.169756	0.691022	0.173625	0.168724	-0.591524	0.0323923	0.908324	0.481728	0.391746	1.23284	0.888592	1.44196	8.90901e-07	1.18758	4.50019e-06	0.0175854	2.68743	0.0942672	C8a	One sex_Male only
1251	ONLI_0173	CSHPOS	TAG 53:1; TAG 17:0-18:0-18:1;	1.28922e-05	1	0.626162	0.973669	34	6	0.041581	0.00015551	0.0299256	0.173364	0.000408473	0.295159	0.232265	-0.522583	0.00966768	-1.23184	0.624735	0.27719	0.120923	0.916568	1.00993	0.412797	1.38214	0.00663616	0.769365	0.0139077	0.0551457	2.2784	0.151774	C8a	One sex_Female only
1271	ONLI_0176	CSHPOS	TAG 47:0; TAG 15:0-16:0-16:0;	0.00223457	1	0.58055	0.967143	39	6	0.0058782	7.50786e-06	0.0041305	0.0617603	2.34769e-05	0.130193	0.227824	-0.52281	0.00151449	-1.47849	0.408396	0.452546	0.0589873	0.834426	0.920638	0.493034	1.20961	0.00294602	0.76753	0.00676812	0.02108	2.69856	0.106481	C8a	One sex_Female only
130	ONLI_0179	CSHPOS	PC40:7 A	0.0115633	1	0.759301	0.98779	40	6	0.031476	9.17624e-08	0.0109553	0.147114	4.1797e-07	0.191839	0.62442	-0.213406	0.022099	-0.998026	0.241884	0.571214	0.185256	0.738777	1.03354	0.71767	1.23532	3.95357e-05	1.06481	0.000137243	0.00494858	2.63405	0.0717091	C8a	One sex_Female only
131	ONLI_0180	CSHPOS	PC 39:7; PC 17:1-22:6;	0.00412909	1	0.445367	0.679962	37	6	0.534789	2.58339e-07	0.044992	0.784604	1.0771e-06	0.312132	0.572722	-0.247051	0.0319748	-0.81109	0.427336	0.409554	0.219013	0.843961	1.0251	0.772328	1.2151	1.59915e-05	1.14165	5.83394e-05	0.0266068	2.36229	0.113249	C8a	Interaction_One sex_Female only2
1351	ONLI_0184	CSHPOS	TAG 58:10; TAG 16:1-20:4-22:5;	0.0244583	1	0.975228	0.701568	39	6	0.0449627	0.140171	0.0915576	0.180768	0.196189	0.405322	0.0513354	-0.833308	0.295591	-0.700536	0.0731132	-0.956281	0.613183	0.522038	0.738362	0.766373	0.709091	0.224531	-0.382143	0.322278	0.341979	-0.637888	0.50654	C8a	Genotype effect with no sex effect(real)
1361	ONLI_0185	CSHPOS	PCo-44:5	0.0676945	1	0.817016	0.936309	33	6	0.0470215	0.0421293	0.0251313	0.186701	0.0662348	0.270017	0.0546566	0.829569	0.316052	0.520388	0.07934	1.15454	0.627623	0.558213	1.15927	1.08611	1.22823	0.109482	0.520996	0.173237	0.180261	1.15515	0.323566	C8a	cannot classify
1421	ONLI_0191	CSHPOS	TAG 54:1; TAG 18:0-18:0-18:1;	2.18588e-07	1	0.836611	0.993843	38	6	0.08391	3.95376e-10	0.0359172	0.267085	2.88478e-09	0.310461	0.6413	-0.203801	0.0501657	-0.761886	0.389847	0.354284	0.284393	0.834426	1.18443	0.60783	1.32802	8.58737e-08	1.32772	5.43003e-07	0.0116014	2.44389	0.0871166	C8a	Interaction_cannot classify2
1471	ONLI_0196	CSHPOS	PCo-36:3	0.749164	1	0.956622	0.750936	39	6	0.0137596	1.82081e-09	0.501825	0.101332	1.20571e-08	0.773851	0.106034	0.695952	0.237487	0.500064	0.0315046	0.856224	0.563675	0.391746	1.20233	1.17153	1.21458	4.84319e-08	1.38898	3.31864e-07	0.0235183	1.74514	0.11134	C8a	Genotype effect with no sex effect(real)
1521	ONLI_0201	CSHPOS	TAG 50:0; TAG 16:0-16:0-18:0;	0.548127	1	0.936307	0.865561	39	6	0.0214219	0.0388683	0.0130413	0.119411	0.0616262	0.213393	0.233883	-0.516173	0.00307923	-1.52102	0.485466	0.477644	0.0638534	0.863537	0.802104	0.52364	1.12642	0.142049	-0.430008	0.216089	0.184476	1.56865	0.326667	C8a	One sex_Female only
1631	ONLI_0213	CSHPOS	PC40:4	0.0096369	1	0.98548	0.845614	39	5	0.00597534	0.000189829	0.000608861	0.0619548	0.000487247	0.0602069	0.683783	0.192724	0.10689	-0.789632	0.0171867	1.76992	0.410874	0.338539	1.15187	0.847887	1.58463	0.0875375	0.475627	0.143707	0.015932	3.03518	0.089529	C8a	One sex_Male only
1641	ONLI_0214	CSHPOS	PE 40:7e; PE 18:1e/22:6;	0.403742	1	0.94498	0.988204	39	6	0.0104411	0.103163	0.0690954	0.0842704	0.149161	0.37278	0.012811	-1.04972	0.00592108	-1.7376	0.492134	-0.368218	0.0933162	0.869511	0.876832	0.789579	0.960968	0.394086	0.248784	0.501946	0.0480361	1.61817	0.142588	C8a	Genotype effect with no sex effect(real)
170	ONLI_0222	CSHPOS	CE (18:3)	0.000308031	1	0.911219	0.992606	39	6	0.0587748	2.12372e-08	0.0326771	0.2195	1.14623e-07	0.299414	0.442629	-0.334529	0.0243727	-0.943783	0.507409	0.305194	0.189028	0.872391	0.960862	0.69177	1.12245	5.3204e-06	1.18827	2.18358e-05	0.00380566	2.43724	0.0717091	C8a	Interaction_One sex_Female only2
1724	ONLI_0224	CSHPOS	PC16:0/9:0COOH	0.00159806	1	0.98705	0.68223	39	6	0.00376564	0.350925	0.431717	0.0494554	0.438934	0.727202	0.00486434	1.17585	0.0171896	1.48042	0.130348	0.879605	0.171461	0.61876	1.99393	2.44659	1.64863	0.270964	0.324528	0.372296	0.736579	-0.276285	0.829178	C8a	Genotype effect with no sex effect(real)
1731	ONLI_0225	CSHPOS	PE 36:3; PE 18:1-18:2;	0.00142632	1	0.295885	0.4377	40	6	0.675041	6.96042e-12	0.0444727	0.837863	1.33649e-10	0.312132	0.806953	-0.106622	0.295697	0.392972	0.100844	-0.606215	0.613183	0.571456	0.83882	1.16219	0.719513	8.71269e-11	1.68203	1.26663e-08	0.0789254	0.682839	0.189037	C8a	Interaction_cannot classify2
1751	ONLI_0227	CSHPOS	LPC 20:4	0.875326	1	0.983159	0.980757	39	5	0.0471876	9.94016e-07	0.0199994	0.186701	3.57664e-06	0.254186	0.732629	-0.161696	0.0268838	-0.975722	0.285265	0.66418	0.191473	0.775135	0.942961	0.779003	1.18018	5.38325e-07	-1.40103	2.90548e-06	0.797506	0.238869	0.876478	C8a	One sex_Female only
1781	ONLI_0230	CSHPOS	LPC 22:4	0.767569	1	0.707072	0.463899	39	6	0.239813	0.0476785	0.0380282	0.538383	0.073668	0.311763	0.25329	0.495677	0.732919	-0.194976	0.0572418	1.17674	0.89081	0.495676	1.16456	0.938086	1.36842	0.225374	0.374083	0.3229	0.0347738	1.7458	0.125342	C8a	Interaction_cannot classify2
181	ONLI_0233	CSHPOS	TAG 58:10; TAG 18:2-18:2-22:6;	0.0165105	1	0.945942	0.929338	40	6	0.00900322	0.490581	0.0580081	0.0762853	0.575265	0.348934	0.011078	-1.06882	0.114317	-0.939738	0.054352	-1.19791	0.417552	0.495676	0.661756	0.693116	0.627924	0.574836	-0.162918	0.671068	0.675841	-0.421087	0.78549	C8a	Genotype effect with no sex effect(real)
1842	ONLI_0236	CSHPOS	CE (16:1)	0.00294595	1	0.940615	0.999208	36	6	0.00260264	6.53943e-07	0.000854874	0.0386958	2.45384e-06	0.073313	0.441173	0.337422	0.119724	-0.761212	0.00420269	1.39104	0.417552	0.211995	1.49963	0.605044	1.99477	0.00207393	0.810315	0.00502849	0.00472124	2.96257	0.0717091	C8a	One sex_Male only
187	ONLI_0239	CSHPOS	TAG 58:1; TAG 18:0-18:1-22:0;	5.16971e-07	1	0.544691	0.688598	35	5	0.0498673	0.000236096	0.305164	0.193298	0.000592496	0.622977	0.0555636	-0.890988	0.0340172	-1.07105	0.645852	-0.300461	0.226644	0.916568	0.460339	0.372804	0.611318	0.00308674	0.897209	0.00700965	0.0432224	1.6678	0.135106	C8a	Genotype effect with no sex effect(real)
188	ONLI_0240	CSHPOS	LPC p-16:0	0.418804	1	0.999844	0.959398	39	6	0.0193519	0.0233346	0.0479834	0.115122	0.0399733	0.31435	0.543435	0.265099	0.209788	-0.843465	0.00991006	1.38035	0.537902	0.258549	1.01523	0.873052	1.16199	0.391079	-0.261013	0.499466	0.0460854	1.96281	0.139139	C8a	One sex_Male only
197	ONLI_0251	CSHPOS	PC40:5 A	0.00055695	1	0.569106	0.775713	40	6	0.579088	3.04081e-11	0.0462574	0.800376	3.37488e-10	0.312132	0.738761	0.145471	0.346955	-0.365252	0.0844903	0.656194	0.666459	0.55913	1.18623	0.871528	1.34844	1.00622e-08	1.38997	9.07218e-08	0.00630579	2.41141	0.072014	C8a	Interaction_cannot classify2
1982	ONLI_0252	CSHPOS	CE (20:4)	0.211535	1	0.468566	0.624604	40	5	0.00422325	0.0148364	0.00435798	0.0519987	0.0259801	0.13208	0.0974043	-0.771409	0.00025113	-1.76809	0.401999	0.695506	0.0518433	0.834426	0.81322	0.575416	1.17007	0.699249	-0.112446	0.781572	0.0249643	2.35115	0.112368	C8a	One sex_Female only
203	ONLI_0257	CSHPOS	CE ( 22:4)	0.000137366	1	0.88024	0.995301	36	6	0.000254062	0.000123776	4.75924e-05	0.0117765	0.000329512	0.0176026	0.891737	0.059844	0.00145634	-1.48763	0.0167369	1.61215	0.0589873	0.338171	1.46668	0.30332	2.58681	0.764615	-0.0870018	0.832205	0.000111744	3.01278	0.0220135	C8a	Different direction
2111	ONLI_0265	CSHPOS	LPE20:4	0.0813849	1	0.909482	0.99263	36	6	0.0315511	0.0671765	0.0729253	0.147114	0.101408	0.375589	0.224713	0.52893	0.503625	-0.408014	0.0183756	1.46587	0.742348	0.343046	1.2145	0.935098	1.5104	0.541945	-0.197289	0.645562	0.0407343	1.6766	0.132639	C8a	Genotype effect with no sex effect(real)
2182	ONLI_0272	CSHPOS	PCp-32:0 or PC o-32:1	0.293978	1	0.930577	0.618164	40	6	0.000843958	0.000222189	0.730049	0.0214529	0.00056117	0.876949	0.00450164	-1.18448	0.0152143	-1.06944	0.0325958	-1.29951	0.166512	0.391746	0.818163	0.831054	0.807306	0.00050277	0.925108	0.00139012	0.451083	0.695037	0.607612	C8a	Genotype effect with no sex effect(real)
2201	ONLI_0274	CSHPOS	PE 38:7e; PE 16:1e/22:6; [M+H]+	0.134082	1	0.275553	0.71946	40	6	0.000531704	2.66842e-13	0.241584	0.0158778	7.35801e-11	0.576371	0.0488552	-0.840951	0.00118162	-1.10493	0.127833	-0.576977	0.0518433	0.615946	0.815391	0.742168	0.863092	2.78146e-10	1.46834	1.26663e-08	0.0031757	1.99628	0.0717091	C8a	Genotype effect with no sex effect(real)
2232	ONLI_0277	CSHPOS	PC38:3	1.1793e-08	1	0.59645	0.928013	38	5	0.010827	4.21964e-07	0.00377854	0.0861786	1.67933e-06	0.125821	0.663606	0.206085	0.259972	-0.531462	0.0100025	1.49227	0.588673	0.258549	1.72701	0.855819	2.74294	0.000259268	0.976403	0.000753885	0.00339014	3.00014	0.0717091	C8a	One sex_Male only
2331	ONLI_0288	CSHPOS	SMd36:1	0.000411143	1	0.959719	0.530643	40	6	0.216393	7.56841e-11	0.0409232	0.514757	7.09989e-10	0.311763	0.445872	-0.331627	0.0247079	-0.863379	0.617428	0.200125	0.189028	0.916568	0.784028	0.6661	1.01672	5.51515e-10	-1.63309	1.27659e-08	0.143265	-0.569585	0.274013	C8a	Interaction_One sex_Female only2
2342	ONLI_0289	CSHPOS	LPC 17:1	0.0913887	1	0.976643	0.999991	40	6	0.0319205	6.64975e-09	0.741794	0.147961	3.88148e-08	0.885064	0.153107	0.616322	0.0902322	0.708561	0.23505	0.524083	0.382274	0.737718	1.20218	1.27692	1.15621	4.272e-08	1.42058	2.95293e-07	0.117469	1.2361	0.241056	C8a	Genotype effect with no sex effect(real)
2361	ONLI_0291	CSHPOS	LPC 22:6	0.2082	1	0.988284	0.886766	37	5	0.0228555	0.000826721	0.014608	0.123357	0.00184548	0.213393	0.379699	-0.415366	0.00282782	-1.3567	0.4098	0.630526	0.0638534	0.834426	0.914054	0.75457	1.13446	0.000617091	-1.04199	0.00168259	0.362907	0.945237	0.521058	C8a	One sex_Female only
2461	ONLI_0302	CSHPOS	SMd38:2	0.0121374	1	0.750317	0.997604	39	6	0.0366635	1.42047e-10	0.0106112	0.160505	1.17824e-09	0.190036	0.822182	0.0982345	0.132942	-0.598497	0.0570459	0.761854	0.434682	0.495676	1.15712	0.816333	1.36054	6.07402e-08	1.2914	4.05621e-07	0.0120541	2.65175	0.0871951	C8a	cannot classify
2512	ONLI_0308	CSHPOS	CE (20:3)	2.7285e-05	1	0.886784	0.994788	37	5	0.000554795	1.22917e-06	0.000172716	0.0158778	4.363e-06	0.0272201	0.3351	-0.455313	0.00237842	-1.49535	0.0411785	1.25112	0.0594377	0.450947	1.10998	0.455483	1.79981	0.009548	0.677017	0.0194414	0.00164279	3.42348	0.0717091	C8a	Different direction
2522	ONLI_0310	CSHPOS	DAG 36:4; DAG 18:2-18:2;	0.0110554	1	0.273782	0.894325	40	6	0.0291495	0.000528955	0.0305952	0.140919	0.00121432	0.296872	0.177825	-0.582057	0.677862	0.200649	0.0247575	-1.36476	0.853283	0.377436	0.794003	1.09072	0.599263	0.00033866	1.05895	0.000963409	0.468667	-0.50646	0.621033	C8a	One sex_Male only
2562	ONLI_0314	CSHPOS	CE (18:2)	0.0186085	1	0.991055	0.936016	36	6	0.0188628	1.8366e-06	0.00622288	0.114939	6.31984e-06	0.144224	0.65249	-0.197763	0.0232745	-1.11224	0.175001	0.666223	0.189028	0.68358	0.989576	0.769695	1.15178	0.000980605	0.90894	0.0025335	0.00561581	2.68741	0.0717091	C8a	One sex_Female only
2582	ONLI_0316	CSHPOS	SMd36:2	0.309092	1	0.820168	0.824862	38	6	0.0194353	1.97902e-07	0.0140046	0.115122	8.52167e-07	0.213393	0.35553	-0.402622	0.0162104	-1.19557	0.471852	0.313134	0.168077	0.855057	0.896586	0.771876	1.05045	2.45629e-07	-1.46668	1.40031e-06	0.942228	0.0420301	0.966485	C8a	One sex_Female only
260	ONLI_0318	CSHPOS	TAG 56:8; TAG 18:2-18:3-20:3;	0.156084	1	0.998095	0.999967	40	6	0.0334218	0.831738	0.150502	0.151062	0.871555	0.510998	0.0385893	-0.881089	0.352991	-0.536114	0.0613569	-1.22606	0.666459	0.503638	0.73513	0.816462	0.654696	0.926245	0.0292607	0.946668	0.191301	-0.660689	0.332991	C8a	Genotype effect with no sex effect(real)
2622	ONLI_0320	CSHPOS	PC36:4 A	0.126548	1	0.918573	0.999998	40	6	0.0324726	1.12688e-09	0.00900652	0.149375	7.78933e-09	0.173101	0.902963	0.0532113	0.0987733	-0.682131	0.0666854	0.788553	0.39808	0.516364	1.02999	0.850031	1.16429	7.27193e-07	1.21491	3.7404e-06	0.00694006	2.68559	0.0734284	C8a	cannot classify
263	ONLI_0321	CSHPOS	PCo-42:5	0.94524	1	0.306293	0.61044	38	6	0.0344181	0.400307	0.11252	0.153229	0.487565	0.447808	0.0399418	0.877416	0.351936	0.537885	0.0612552	1.21695	0.666459	0.503638	1.1454	1.08074	1.2087	0.635129	0.151996	0.724286	0.174256	0.831058	0.314218	C8a	Genotype effect with no sex effect(real)
265	ONLI_0323	CSHPOS	PC 36:0; PC 18:0-18:0;	0.0505725	1	0.981852	0.495266	40	5	0.000334899	9.98495e-08	0.0127448	0.0125667	4.49608e-07	0.213393	0.0369755	-0.961804	0.000182059	-1.74262	0.798414	-0.139299	0.0518433	0.967498	0.755922	0.618965	0.968836	1.16828e-07	-1.39489	7.19221e-07	0.736117	0.208435	0.829178	C8a	One sex_Female only
2663	ONLI_0324	CSHPOS	PE 36:5e; PE 16:0e/20:5;	0.0231528	1	0.478773	0.903247	39	6	0.0169747	0.000472647	0.0785808	0.110185	0.00109543	0.391909	0.043932	-0.860254	0.000884062	-1.48132	0.676883	-0.258116	0.0518433	0.927624	0.888028	0.744495	1.01012	0.00717589	0.73809	0.0149989	0.0520604	1.96129	0.147567	C8a	Genotype effect with no sex effect(real)
2711	ONLI_0329	CSHPOS	TAG 56:8; TAG 16:1-18:1-22:6;	0.579664	1	0.981216	0.981022	39	6	0.0111027	0.0283558	0.688729	0.0866234	0.0469419	0.865366	0.013581	-1.04156	0.059928	-1.18479	0.100201	-0.884626	0.31068	0.571456	0.754615	0.701931	0.802978	0.0705265	0.534284	0.119004	0.31091	0.834447	0.472967	C8a	Genotype effect with no sex effect(real)
273	ONLI_0331	CSHPOS	DAG 24:0; DAG 12:0-12:0;	0.525518	1	0.769089	0.837432	38	6	0.00799318	0.00710738	0.61445	0.0707711	0.0135281	0.825366	0.0189911	-0.994283	0.038495	-1.19603	0.144155	-0.827095	0.242673	0.657873	0.881492	0.85473	0.902494	0.0295513	0.656695	0.054535	0.137423	1.02563	0.267913	C8a	Genotype effect with no sex effect(real)
2761	ONLI_0334	CSHPOS	TAG 46:1; TAG 14:0-16:0-16:1;	1.55565e-05	1	0.670647	0.78872	38	6	0.0404796	0.000182064	0.721446	0.170577	0.000470381	0.876949	0.0801651	0.752479	0.233099	0.6037	0.128192	0.850223	0.561719	0.615946	1.51444	1.31723	1.56599	0.00102956	0.969657	0.00265129	0.107004	1.21618	0.226665	C8a	Genotype effect with no sex effect(real)
2783	ONLI_0336	CSHPOS	SMd32:2	0.00405555	1	0.9779	0.999546	23	5	0.0101867	0.00730295	0.297729	0.0836155	0.0137673	0.615776	0.014177	-1.14128	0.0161071	-1.30783	0.426173	-0.532973	0.168077	0.843961	0.71048	0.595795	0.901658	0.0553848	0.687101	0.0954263	0.128242	1.46196	0.256484	C8a	Genotype effect with no sex effect(real)
2791	ONLI_0337	CSHPOS	DAG 36:5; DAG 18:2-18:3;	0.0272416	1	0.47803	0.505295	40	6	0.0658185	0.000714268	0.0203584	0.234683	0.00160354	0.254642	0.82803	-0.0947907	0.153595	0.771111	0.0961454	-0.960693	0.465511	0.571456	0.922462	1.40907	0.622894	0.000694994	1.04728	0.00187553	0.16156	-0.684526	0.297452	C8a	Interaction_cannot classify2
2882	ONLI_0346	CSHPOS	PC 32:1; PC 16:0-16:1;	4.39033e-05	1	0.572444	0.965753	38	5	0.0220107	1.29207e-10	0.0353304	0.120448	1.09479e-09	0.309337	0.137192	0.695558	0.718765	-0.171696	0.00681875	0.988976	0.88194	0.239433	1.66003	0.861711	1.63129	2.99489e-08	1.35256	2.16511e-07	0.00865737	2.51324	0.0802589	C8a	One sex_Male only
289	ONLI_0347	CSHPOS	TAG 58:9; TAG 18:1-18:2-22:6;	0.00670539	1	0.99988	0.946195	39	6	0.00771675	0.40119	0.0482694	0.0690999	0.487867	0.31435	0.00961309	-1.0889	0.0896131	-1.12983	0.0536722	-1.04163	0.381703	0.495676	0.658308	0.631703	0.69182	0.405496	-0.246969	0.511249	0.861915	-0.158778	0.921825	C8a	cannot classify
2941	ONLI_0352	CSHPOS	TAG 56:8; TAG 16:0-18:2-22:6;	0.00720892	1	0.976759	0.955579	38	6	0.0120444	0.00360675	0.706927	0.093049	0.00719523	0.871766	0.0242307	-0.957576	0.129294	-0.800415	0.0679021	-1.0707	0.431712	0.516364	0.674825	0.665147	0.692478	0.00396134	0.836697	0.00871938	0.536139	0.56641	0.674884	C8a	Genotype effect with no sex effect(real)
2962	ONLI_0354	CSHPOS	Heptadecasphing-4-enine	0.00875866	1	0.48858	0.924334	37	6	0.000452654	0.0405649	0.0113986	0.0145603	0.064187	0.195264	0.00358827	-1.21388	0.00382755	-2.14555	0.437002	-0.274509	0.0726136	0.84484	0.880539	0.783051	0.983158	0.333347	-0.284451	0.443463	0.0160198	1.58659	0.089529	C8a	One sex_Female only
2991	ONLI_0358	CSHPOS	PCo-40:4	0.761314	1	0.990127	0.99649	39	6	0.0133929	0.000946356	0.00366935	0.0995626	0.00210064	0.125821	0.70793	-0.163669	0.017726	-1.28323	0.120282	0.931502	0.173522	0.601442	0.982615	0.796294	1.2006	0.00105268	-0.951075	0.00268449	0.24272	1.26365	0.398002	C8a	One sex_Female only
300	ONLI_0359	CSHPOS	CE (20:2)	0.00217994	1	0.994681	0.99923	33	5	0.000271652	1.87011e-08	8.93534e-05	0.0118923	1.03052e-07	0.0176026	0.323511	-0.469411	0.0021509	-1.40475	0.0305123	1.12547	0.0594377	0.391746	1.06132	0.342433	1.72071	0.000324334	0.904545	0.000929364	0.00424596	3.43476	0.0717091	C8a	Different direction
3031	ONLI_0362	CSHPOS	CE (18:1)	4.87909e-05	1	0.919677	0.983956	36	6	0.00617881	0.00398173	0.00238206	0.0628908	0.00788342	0.0948796	0.356332	-0.403426	0.00736985	-1.59177	0.183444	0.784915	0.101885	0.701716	0.808726	0.469421	1.27281	0.0220269	-0.733909	0.0421223	0.0140929	1.64277	0.0879866	C8a	One sex_Female only
3071	ONLI_0366	CSHPOS	SMd34:1	0.810995	1	0.994867	0.873864	39	6	0.802165	9.93841e-05	0.0393943	0.908198	0.000268201	0.311763	0.813308	-0.103224	0.148067	-0.809666	0.192864	0.634719	0.457353	0.716873	0.982221	0.88922	1.09791	5.95799e-05	-1.22852	0.000202366	0.608867	0.21587	0.72695	C8a	Interaction_cannot classify2
3082	ONLI_0367	CSHPOS	PC33:2	0.00995893	1	0.340357	0.587803	38	6	0.0681122	1.72749e-11	0.0267286	0.238544	2.347e-10	0.277133	0.759139	0.134228	0.0424388	0.730319	0.335942	-0.372531	0.257245	0.819575	0.982551	1.24756	0.865433	2.49908e-10	1.69733	1.26663e-08	0.0428004	0.594477	0.135106	C8a	Interaction_One sex_Female only2
309	ONLI_0368	CSHPOS	TAG 52:0; TAG 16:0-18:0-18:0;	0.0867163	1	0.999863	0.991602	40	6	0.0359553	0.988001	0.29673	0.158679	0.99345	0.615325	0.0413701	-0.86943	0.0548659	-1.28918	0.419742	-0.449676	0.300238	0.841619	0.738361	0.603915	0.877923	0.732624	-0.105402	0.808554	0.338161	0.734106	0.501829	C8a	Genotype effect with no sex effect(real)
3141	ONLI_0374	CSHPOS	LPC 18:2	0.554726	1	0.984655	0.999605	40	6	0.033739	0.96835	0.177349	0.151062	0.978282	0.538707	0.038938	0.87959	0.263635	0.619599	0.0925873	1.13958	0.593344	0.571456	1.19164	1.13116	1.2526	0.797535	-0.0791679	0.857378	0.576732	0.440815	0.710101	C8a	Genotype effect with no sex effect(real)
318	ONLI_0379	CSHPOS	PC38:5 A	0.0111941	1	0.81494	0.984709	39	6	0.0795646	1.29779e-06	0.0244523	0.259078	4.58592e-06	0.270017	0.965455	-0.018936	0.0971574	-0.733755	0.166867	0.721838	0.396032	0.68358	1.04398	0.838263	1.20135	0.000177655	1.01226	0.00053432	0.0114006	2.46785	0.0871166	C8a	Interaction_cannot classify2
319	ONLI_0380	CSHPOS	PCo-32:0	0.0570959	1	0.376435	0.958244	40	6	0.0423884	2.87562e-11	0.0211153	0.17488	3.28404e-10	0.255983	0.54101	0.266243	0.403859	-0.32578	0.0248752	0.858266	0.701255	0.377436	1.0775	0.924528	1.18145	4.92077e-09	1.35266	5.03581e-08	0.0185754	2.5367	0.0989017	C8a	One sex_Male only
327	ONLI_0388	CSHPOS	TAG 40:0; TAG 12:0-14:0-14:0;	0.110994	1	0.980382	0.858181	39	5	0.0394722	0.551831	0.164219	0.167226	0.629295	0.513512	0.0454956	-0.924886	0.11921	-1.13497	0.23856	-0.684755	0.417552	0.737718	0.845281	0.816656	0.877844	0.380042	-0.265905	0.486948	0.878858	0.184312	0.932087	C8a	Genotype effect with no sex effect(real)
3341	ONLI_0395	CSHPOS	SM d40:3; SM d15:3/25:0;	0.000320424	1	0.215792	0.221749	38	5	0.0418879	7.53885e-12	0.0159977	0.173725	1.38154e-10	0.221161	0.452422	-0.355198	0.044482	-0.725668	0.205552	0.553627	0.263548	0.730259	0.991831	0.798091	1.25846	1.34113e-09	1.41248	1.86498e-08	0.0275234	2.69178	0.11415	C8a	One sex_Female only
3362	ONLI_0397	CSHPOS	Lyso-PAF C-16	0.00166779	1	0.196924	0.191618	39	6	0.110327	5.34322e-12	0.0362467	0.313854	1.07229e-10	0.310461	0.894099	-0.0581985	0.127681	-0.552069	0.20287	0.472301	0.429968	0.72996	1.03548	0.92839	1.11298	1.22595e-09	1.42854	1.86498e-08	0.0125407	2.45291	0.0871951	C8a	Interaction_cannot classify2
3381	ONLI_0399	CSHPOS	CE (22:6)	0.00308758	1	0.680863	0.690608	39	5	0.00746786	8.57471e-05	0.00687792	0.0688888	0.000232195	0.154851	0.117242	-0.731084	0.00118424	-1.48401	0.405161	0.588471	0.0518433	0.834426	0.789599	0.537687	1.12466	0.0145443	0.674232	0.0283686	0.00489316	2.74671	0.0717091	C8a	One sex_Female only
3401	ONLI_0401	CSHPOS	PCp-38:2 or PC o-38:3	0.00252628	1	0.779535	0.993196	40	6	0.0195765	9.93591e-06	0.64221	0.115122	2.98836e-05	0.840766	0.069218	0.778248	0.195944	0.628093	0.069406	0.928403	0.518133	0.516364	1.28521	1.25301	1.30643	8.23179e-05	1.10121	0.000268043	0.0399182	1.40152	0.131234	C8a	Genotype effect with no sex effect(real)
3432	ONLI_0404	CSHPOS	LPC p-18:0	0.859485	1	0.977969	0.970821	38	6	0.422231	0.000563495	0.049526	0.707911	0.00128334	0.317289	0.533222	0.272293	0.409869	-0.417007	0.0820471	1.00124	0.706768	0.55913	1.04051	0.951125	1.12651	0.00768804	0.753378	0.0159846	0.0593533	2.17163	0.157476	C8a	Interaction_cannot classify2
3492	ONLI_0410	CSHPOS	N-Nervonoyl-D-erythro-sphingosylphosphorylcholine	0.202196	1	0.899235	0.706934	39	6	0.790167	0.0112529	0.0368065	0.901246	0.0204316	0.311763	0.79594	-0.113027	0.290864	-0.669691	0.419555	0.429248	0.613183	0.841619	0.972718	0.848987	1.07731	0.0728576	0.561193	0.122153	0.0348273	1.66013	0.125342	C8a	Interaction_cannot classify2
3602	ONLI_0421	CSHPOS	CE ( 24:1)	5.31817e-05	1	0.999116	0.999912	20	6	0.0431246	0.0244166	0.0384681	0.176074	0.0412882	0.311763	0.0544432	-0.861135	0.00699411	-1.57972	0.859469	-0.10265	0.101885	0.973929	0.529732	0.0678754	0.780377	0.306831	0.398958	0.413526	0.0137552	1.87603	0.0876368	C8a	One sex_Female only
361	ONLI_0422	CSHPOS	TAG 56:7; TAG 16:0-18:2-22:5;	0.615212	1	0.997187	0.991904	40	6	0.0391881	0.232436	0.1174	0.167226	0.306987	0.457777	0.0449054	-0.855498	0.235418	-0.754117	0.102164	-0.956878	0.562727	0.571456	0.788606	0.788462	0.788741	0.247649	0.365222	0.348478	0.743013	0.162461	0.834038	C8a	Genotype effect with no sex effect(real)
363	ONLI_0424	CSHPOS	TAG 56:9; TAG 16:0-20:4-20:5;	0.0446775	1	0.98941	0.600646	40	6	0.0289306	7.63518e-05	0.787471	0.140724	0.000207466	0.899866	0.0753223	-0.762358	0.128939	-0.853981	0.16152	-0.670736	0.431712	0.68358	0.712195	0.712922	0.711711	0.000385461	1.01734	0.0010926	0.0915842	1.20058	0.203138	C8a	Genotype effect with no sex effect(real)
364	ONLI_0425	CSHPOS	CE ( 22:5)	4.74884e-05	1	0.710737	0.939103	36	6	0.0088923	1.40559e-06	0.00211893	0.0761644	4.94467e-06	0.0948796	0.974983	-0.0137896	0.0259485	-1.02068	0.0591368	0.993098	0.191098	0.501073	1.38933	0.541986	1.86118	0.00212459	0.841599	0.00511589	0.00254824	2.85537	0.0717091	C8a	One sex_Female only
3662	ONLI_0427	CSHPOS	LPC 20:3 b	1.62514e-06	1	0.598218	0.623659	39	5	0.021627	0.00119598	0.0889309	0.119411	0.00261061	0.405322	0.0736711	0.83108	0.424724	0.374983	0.0208157	1.68557	0.71421	0.366455	1.68045	1.09237	2.43575	0.00635264	0.781569	0.013349	0.0175064	2.09215	0.0942672	C8a	Genotype effect with no sex effect(real)
3691	ONLI_0430	CSHPOS	TAG 58:9; TAG 18:2-18:2-22:5;	0.0110941	1	0.691457	0.779051	38	6	0.0259982	0.0259868	0.788008	0.131324	0.0435693	0.899866	0.0376902	-0.887087	0.15773	-0.972166	0.0856488	-0.767799	0.475498	0.55913	0.767401	0.745029	0.806285	0.0276015	-0.64996	0.0514184	0.667397	-0.445593	0.779124	C8a	Genotype effect with no sex effect(real)
370	ONLI_0432	CSHPOS	CE (20:5)	0.00620965	1	0.39091	0.736387	39	6	0.0500851	0.000448626	0.0220957	0.193298	0.00104591	0.259872	0.436844	0.338756	0.295408	-0.507393	0.0568897	1.16843	0.613183	0.495676	1.24524	0.874089	1.48973	0.0234539	0.642515	0.0445342	0.0295079	2.31834	0.117732	C8a	Interaction_cannot classify2
3711	ONLI_0433	CSHPOS	LPC 18:1	0.00163791	1	0.518511	0.615575	39	6	0.077564	0.000374591	0.0433311	0.256699	0.000889089	0.311763	0.130234	0.652786	0.888926	-0.061627	0.0280321	1.34751	0.953333	0.391746	1.27751	1.00018	1.49096	0.00633255	0.767967	0.0133424	0.0165415	2.1771	0.091284	C8a	Interaction_One sex_Male only2
376	ONLI_0438	CSHPOS	TAG 56:5; TAG 18:0-18:1-20:4;	4.38639e-05	1	0.711051	0.946224	39	6	0.265304	0.0457419	0.0431191	0.571256	0.0712345	0.311763	0.278982	-0.470103	0.0325052	-1.12952	0.760222	0.199182	0.219013	0.955303	0.85522	0.63429	1.03467	0.213581	0.384718	0.309992	0.0394939	1.71342	0.131234	C8a	Interaction_One sex_Female only2
377	ONLI_0439	CSHPOS	PC 16:0/o-20:5	0.215933	1	0.495157	0.335684	40	6	0.0706814	0.000521436	0.0219059	0.243218	0.00120144	0.259872	0.851524	-0.0816818	0.0206403	-0.930937	0.254609	0.767573	0.180685	0.750764	0.989734	0.844917	1.11604	0.0269753	0.630029	0.0504906	0.0242786	2.32854	0.112181	C8a	Interaction_One sex_Female only2
3812	ONLI_0443	CSHPOS	PE 34:0; PE 17:0-17:0;	0.758255	1	0.974787	0.94374	39	6	0.0185472	0.0813292	0.084145	0.114939	0.12092	0.400506	0.0221149	-0.970464	0.00463271	-1.62302	0.60583	-0.310455	0.0811239	0.916568	0.92449	0.86472	0.983561	0.324306	0.290617	0.434615	0.0558566	1.60318	0.151774	C8a	Genotype effect with no sex effect(real)
3842	ONLI_0447	CSHPOS	LPE 16:0	0.452664	1	0.833518	0.698575	39	6	0.319738	0.0127955	0.0376318	0.616809	0.0227605	0.311763	0.333541	-0.420489	0.13188	-0.829075	0.96544	-0.0270525	0.433628	0.997491	0.941621	0.879128	0.996374	0.0557057	0.590839	0.0954263	0.109853	1.39286	0.229613	C8a	Interaction_cannot classify2
388	ONLI_0451	CSHPOS	LPC 20:1	0.00031513	1	0.201304	0.212575	39	5	0.0037397	3.55975e-13	0.00240811	0.0494554	7.35801e-11	0.0948796	0.612466	0.239555	0.491594	-0.261038	0.000682292	1.29725	0.741994	0.0896076	1.2032	0.921368	1.53535	6.47387e-10	1.40771	1.31738e-08	0.00618809	2.966	0.0717091	C8a	One sex_Male only
389	ONLI_0452	CSHPOS	TAG 62:2; TAG 18:2-22:0-22:0;	1.45263e-05	1	0.964805	0.999744	26	5	0.00103472	0.0032783	0.457076	0.0247078	0.00657328	0.738247	0.00156532	-1.41598	0.00231057	-1.46539	0.152831	-0.94894	0.0594377	0.680399	0.285052	0.317811	0.339242	0.0280558	0.729708	0.0521414	0.0433778	1.24616	0.135106	C8a	Genotype effect with no sex effect(real)
3963	ONLI_0471	CSHNEG	FA 11:0	0.841502	1	0.977847	0.989589	39	6	4.24024e-05	0.934362	0.296493	0.00524725	0.948501	0.615325	6.90605e-05	-1.58956	0.00409695	-1.95708	0.00782828	-1.22506	0.0750789	0.244966	0.593793	0.503975	0.687541	0.672863	-0.117414	0.760712	0.201965	0.614609	0.346728	C8a	Genotype effect with no sex effect(real)
3973	ONLI_0473	CSHNEG	FA 13:0	0.000794418	1	0.713284	0.756373	37	6	0.000412131	0.758824	0.00217604	0.01412	0.813542	0.0948796	0.000606668	1.40164	0.178097	0.888583	0.000170785	1.91353	0.487294	0.0448596	1.43128	1.18074	1.68554	0.882872	-0.043396	0.920765	0.0746828	0.981552	0.181636	C8a	One sex_Male only
4011	ONLI_0477	CSHNEG	FA 16:1	0.0104475	1	0.990734	0.998377	40	6	0.542785	0.0116723	0.0170603	0.784836	0.0210476	0.222828	0.553944	-0.257816	0.0862392	-0.971526	0.443863	0.455894	0.379835	0.84484	0.939157	0.541279	1.2297	0.0901492	0.510624	0.147076	0.0259101	1.93804	0.11277	C8a	Interaction_cannot classify2
4192	ONLI_0497	CSHNEG	FAHFA 24:0; FAHFA 16:0/8:0;	0.880638	1	0.864305	0.981426	37	6	0.00477697	0.00156053	0.00344247	0.0570341	0.00331455	0.125821	0.412799	-0.35793	0.173156	0.86063	0.00262741	-1.57226	0.481728	0.188218	0.906828	1.26838	0.521963	0.596768	-0.156536	0.693588	0.00677539	-2.58942	0.0734284	C8a	One sex_Male only
4231	ONLI_0505	CSHNEG	LPE 22:5	0.152326	1	0.99999	0.991219	35	6	0.00142737	2.92328e-08	0.737938	0.0295991	1.5182e-07	0.885064	0.0254814	0.953344	0.0695686	0.842949	0.0135279	1.02689	0.339932	0.29796	1.62937	1.57881	1.63094	1.02016e-06	1.28958	5.05587e-06	0.0816226	1.47353	0.191138	C8a	Genotype effect with no sex effect(real)
4271	ONLI_0513	CSHNEG	LPC 18:3	0.244482	1	0.999686	0.991589	38	6	0.0233738	4.65284e-05	0.324221	0.12445	0.000130015	0.646801	0.0752416	0.764592	0.0167435	1.12709	0.411287	0.461932	0.169152	0.835294	1.18598	1.30592	1.10922	0.000136211	1.13692	0.000419274	0.394946	0.471765	0.555746	C8a	Genotype effect with no sex effect(real)
4321	ONLI_0524	CSHNEG	LPC 20:3 a	5.29198e-07	1	0.171453	0.408314	37	5	0.0142238	0.000833852	0.110391	0.102829	0.00185614	0.446093	0.0690431	0.8461	0.276854	0.460534	0.0259236	1.66337	0.604501	0.38543	1.69402	1.11732	2.45262	0.00400958	0.841893	0.00880097	0.00863976	2.04472	0.0802589	C8a	Genotype effect with no sex effect(real)
4352	ONLI_0531	CSHNEG	LPC 22:5 a	0.00150679	1	0.373457	0.334464	35	6	0.0200931	2.50401e-05	0.729062	0.116422	7.28102e-05	0.876949	0.0942712	0.724132	0.10053	0.661198	0.121357	0.884181	0.39808	0.601442	1.29878	1.26961	1.36081	0.000144069	1.13301	0.000440026	0.0668863	1.356	0.169542	C8a	Genotype effect with no sex effect(real)
437	ONLI_0536	CSHNEG	Cer-NS d40:2; Cer-NS d18:2/22:0;	0.000862656	1	0.332696	0.284002	33	5	0.0018277	3.58272e-10	0.803906	0.0313093	2.63849e-09	0.906263	0.0707909	0.84544	0.0722652	0.734338	0.0223318	0.857161	0.347225	0.377436	1.52861	1.90477	1.44111	2.53575e-09	1.54311	2.93848e-08	0.0489388	1.66593	0.142588	C8a	Genotype effect with no sex effect(real)
439	ONLI_0538	CSHNEG	Cer-NS d41:2; Cer-NS d18:2/23:0;	0.0666753	1	0.929811	0.999975	39	6	0.0427603	1.24045e-09	0.0233719	0.175495	8.49976e-09	0.270017	0.506396	0.28977	0.447867	-0.31949	0.0236436	0.931404	0.71818	0.377436	1.13642	0.763114	1.33939	4.99407e-07	1.26257	2.73287e-06	0.00513319	2.51347	0.0717091	C8a	One sex_Male only
4472	ONLI_0548	CSHNEG	PE 36:6e; PE 16:1e/20:5;	0.000370449	1	0.857104	0.999999	35	5	0.0125925	6.67723e-08	0.00554841	0.0963388	3.16967e-07	0.135929	0.622669	-0.234262	0.00241371	-1.41237	0.426344	0.393289	0.0594377	0.843961	1.11895	0.688455	1.18487	3.83345e-05	1.10499	0.000133662	0.00596313	2.91065	0.0717091	C8a	One sex_Female only
4482	ONLI_0549	CSHNEG	Cer-NS d43:1; Cer-NS d19:1/24:0;	0.00193173	1	0.958904	0.996965	40	6	0.0226412	0.00203894	0.644445	0.123043	0.00423988	0.840766	0.0467918	0.848426	0.236427	0.681674	0.0586906	1.01518	0.562855	0.501073	1.49376	1.35687	1.69776	0.0031041	-0.881687	0.00702881	0.355164	-0.548184	0.51684	C8a	Genotype effect with no sex effect(real)
4521	ONLI_0554	CSHNEG	HexCer-AP t34:0; HexCer-AP t18:0/16:0;	0.868068	1	0.917274	0.66397	39	6	0.0283903	0.00129156	0.675248	0.139822	0.00280372	0.860026	0.0554315	0.819726	0.0510256	0.958297	0.28159	0.657715	0.287201	0.775135	1.19453	1.2587	1.13687	0.00162607	0.91415	0.00402938	0.493991	0.613568	0.636054	C8a	Genotype effect with no sex effect(real)
4602	ONLI_0564	CSHNEG	PE 38:6e; PE 18:1e/20:5;	0.170844	1	0.999544	0.794182	36	6	0.221593	4.61084e-07	0.0481263	0.514757	1.80763e-06	0.31435	0.473666	-0.314061	0.0397239	-0.981808	0.610169	0.228452	0.246476	0.916568	0.972785	0.785942	1.09719	4.97717e-05	1.12711	0.000169784	0.0091913	2.33737	0.0817728	C8a	Interaction_One sex_Female only2
4611	ONLI_0565	CSHNEG	PE 38:6e; PE 18:2e/20:4;	0.000416212	1	0.406446	0.82389	40	6	0.000385018	3.65986e-13	0.133463	0.0137906	7.35801e-11	0.48173	0.0417336	-0.867953	0.000322298	-1.20586	0.168112	-0.530051	0.0518433	0.68358	0.721736	0.719092	0.723011	5.25817e-10	1.43962	1.27659e-08	0.00080051	2.11542	0.0717091	C8a	Genotype effect with no sex effect(real)
464	ONLI_0568	CSHNEG	HexCer-NS d34:1; HexCer-NS d18:1/16:0;	0.00247677	1	0.993665	0.953698	40	5	0.019871	3.03438e-10	0.00513826	0.115988	2.30973e-09	0.135929	0.80212	0.118477	0.0837603	-0.715946	0.0450598	0.965015	0.376716	0.461131	0.940188	0.691648	1.46283	1.11259e-09	-1.62039	1.78923e-08	0.862164	0.0605744	0.921825	C8a	One sex_Male only
4691	ONLI_0573	CSHNEG	PE18:1e/18-HETE	0.282969	1	0.995979	0.999947	34	6	0.00545864	1.10315e-08	0.00161099	0.0597124	6.20913e-08	0.0906759	0.697492	-0.1715	0.122202	0.688244	0.00791254	-1.12655	0.418676	0.244966	0.90487	1.20653	0.699931	3.37277e-08	1.62019	2.39436e-07	0.686964	-0.194603	0.793736	C8a	One sex_Male only
4783	ONLI_0582	CSHNEG	HexCer-NS d36:1; HexCer-NS d18:1/18:0;	3.20535e-05	1	0.212012	0.229992	37	6	0.0185023	2.74706e-12	0.00515975	0.114939	9.31693e-11	0.135929	0.934358	0.0361445	0.132069	-0.56465	0.0236236	0.779325	0.433628	0.377436	0.655019	0.597341	2.17524	6.14676e-11	-1.75609	1.26663e-08	0.0326079	-0.412118	0.122943	C8a	One sex_Male only
4793	ONLI_0583	CSHNEG	SM d36:2	0.0191634	1	0.676009	0.952587	37	6	0.0147923	8.75816e-11	0.0075165	0.10469	7.84658e-10	0.160081	0.57368	0.246437	0.357985	-0.375716	0.00628856	1.00552	0.668466	0.239433	1.12974	0.853429	1.92087	5.38685e-10	-1.68884	1.27659e-08	0.45385	-0.307597	0.610297	C8a	One sex_Male only
4852	ONLI_0590	CSHNEG	PC 33:2; PC 15:0-18:2;	0.178577	1	0.71946	0.275553	40	6	0.00752788	1.02717e-12	0.0020748	0.0688888	9.31693e-11	0.0948796	0.747258	0.140576	0.0134475	0.895548	0.0994126	-0.614396	0.153575	0.571456	0.998308	1.35368	0.801676	1.46594e-11	1.73415	1.15516e-08	0.358259	0.224203	0.518948	C8a	One sex_Female only
4872	ONLI_0593	CSHNEG	PC 34:2e; PC 16:0e/18:2;	0.000780513	1	0.254994	0.254994	40	6	0.0937403	3.5544e-12	0.0326663	0.286308	1.00031e-10	0.299414	0.811433	0.104101	0.0843212	0.627894	0.258305	-0.419693	0.376716	0.753867	0.966637	1.19818	0.851255	3.81424e-11	1.6978	1.26663e-08	0.117009	0.650213	0.24074	C8a	Interaction_cannot classify2
5021	ONLI_0611	CSHNEG	SM d39:1; SM d16:1/23:0;	0.000258968	1	0.196924	0.191618	39	6	0.0231715	1.01295e-12	0.101517	0.124212	9.31693e-11	0.423256	0.185339	-0.573178	0.00583014	-0.936316	0.647354	-0.172598	0.0933162	0.916568	0.888472	0.797164	0.941375	4.42779e-10	1.46026	1.26663e-08	0.0101707	2.22398	0.0830871	C8a	Genotype effect with no sex effect(real)
504	ONLI_0614	CSHNEG	PI 34:2; PI 16:0-18:2;	0.0748374	1	0.975654	0.80907	39	6	0.55078	2.76008e-10	0.0466584	0.784836	2.17676e-09	0.312132	0.742664	0.143465	0.0780991	0.69354	0.367896	-0.364871	0.361141	0.834426	1.01939	1.34921	0.863856	1.70779e-09	1.62784	2.20613e-08	0.156529	0.569427	0.291595	C8a	Interaction_cannot classify2
5061	ONLI_0617	CSHNEG	PC 36:4; PC 16:0-20:4;	0.0174747	1	0.731853	0.682015	38	6	0.850611	8.94018e-06	0.0437063	0.935186	2.73057e-05	0.311763	0.828827	-0.0946771	0.0960354	-0.738881	0.268276	0.60118	0.394541	0.765947	1.01675	0.946494	1.08517	0.000447588	0.981394	0.00125071	0.015943	2.32145	0.089529	C8a	Interaction_cannot classify2
5071	ONLI_0618	CSHNEG	HexCer-NS d40:2; HexCer-NS d18:1/22:1;	1.03996e-06	1	0.480916	0.999621	37	5	7.33329e-05	1.13694e-12	1.28759e-05	0.00722329	9.31693e-11	0.0101462	0.673805	-0.199783	0.00581663	-1.01895	0.00248284	1.36772	0.0933162	0.188218	1.7764	0.667845	2.65834	6.45967e-08	1.19367	4.27749e-07	0.0035566	3.58035	0.0717091	C8a	Different direction
5152	ONLI_0629	CSHNEG	PC 36:0; PC 16:0-20:0;	6.8397e-07	1	0.770354	0.994344	31	5	0.00241562	0.00489985	0.00383211	0.0373237	0.00960467	0.125821	0.0798745	-0.823258	0.00786376	-1.81915	0.25539	0.569781	0.106839	0.750764	0.763531	0.368247	1.88118	0.0125244	-0.781197	0.0246917	0.200687	1.60773	0.345286	C8a	One sex_Female only
5311	ONLI_0651	CSHNEG	PC 38:5; PC 18:1-20:4;	0.0183691	1	0.871437	0.904552	40	6	0.0329911	7.27069e-05	0.015165	0.150271	0.000198246	0.213393	0.416784	0.353089	0.304105	-0.505887	0.0333083	1.21206	0.621962	0.391746	1.10248	0.850725	1.31301	0.00880894	0.73588	0.0180767	0.0050848	2.45383	0.0717091	C8a	One sex_Male only
532	ONLI_0652	CSHNEG	HexCer-NS d42:3; HexCer-NS d18:1/24:2;	0.0418106	1	0.966693	0.653847	40	6	0.725688	0.021641	0.0463813	0.857334	0.0371528	0.312132	0.747319	-0.14054	0.137665	-0.92098	0.24631	0.639899	0.440974	0.74365	0.969433	0.786336	1.20181	0.00615267	-0.84183	0.0130278	0.385917	0.719049	0.547932	C8a	Interaction_cannot classify2
5332	ONLI_0653	CSHNEG	PC 38:4	0.0733707	1	0.865256	0.912874	40	5	0.0240497	0.000669291	0.221616	0.125504	0.00151118	0.568838	0.0784131	-0.817396	0.0204486	-1.30174	0.598114	-0.33961	0.180685	0.916568	0.856904	0.791292	0.93389	0.00078844	-0.994908	0.00209189	0.957018	-0.0327799	0.974775	C8a	Genotype effect with no sex effect(real)
5342	ONLI_0654	CSHNEG	PC 38:4; PC 16:0-22:4;	0.0733707	1	0.865256	0.912874	40	5	0.0240497	0.000669291	0.221616	0.125504	0.00151118	0.568838	0.0784131	-0.817396	0.0204486	-1.30174	0.598114	-0.33961	0.180685	0.916568	0.856904	0.791292	0.93389	0.00078844	-0.994908	0.00209189	0.957018	-0.0327799	0.974775	C8a	Genotype effect with no sex effect(real)
540	ONLI_0663	CSHNEG	PC 38:1; PC 20:0-18:1;	7.11722e-05	1	0.182824	0.182824	40	6	0.0187971	7.8929e-13	0.0172493	0.114939	9.31693e-11	0.222828	0.390538	0.373197	0.609423	-0.190971	0.00631521	0.937366	0.81046	0.239433	1.30782	0.937192	1.45671	8.57089e-10	1.4187	1.48642e-08	0.0032625	2.54703	0.0717091	C8a	One sex_Male only
546	ONLI_0669	CSHNEG	PI 38:4; PI 18:0-20:4;	0.845879	1	0.99865	0.974634	40	6	0.788872	0.00164744	0.0394937	0.901246	0.00347108	0.311763	0.815135	0.10202	0.204812	-0.664413	0.140648	0.868454	0.536186	0.648133	1.01054	0.842782	1.15681	0.0220323	0.653577	0.0421223	0.0415383	2.18644	0.133601	C8a	Interaction_cannot classify2
5481	ONLI_0671	CSHNEG	PC 40:8; PC 18:2-22:6;	0.0286983	1	0.182824	0.182824	40	6	0.047386	3.19235e-12	0.870058	0.186701	9.31693e-11	0.925243	0.262045	-0.486022	0.22514	-0.446784	0.150935	-0.52526	0.553029	0.678916	0.861363	0.874803	0.853151	4.60468e-10	1.57611	1.26663e-08	0.000352007	1.49763	0.0462302	C8a	Genotype effect with no sex effect(real)
5511	ONLI_0674	CSHNEG	PC 40:5; PC 18:0-22:5;	0.571529	1	0.864045	0.848349	40	6	0.0668718	0.00987186	0.0170526	0.2363	0.0182033	0.222828	0.343335	0.41148	0.478408	-0.40068	0.0434924	1.22364	0.735428	0.450947	1.13511	0.874722	1.36261	0.17996	0.397061	0.26782	0.0361509	2.02138	0.127174	C8a	Interaction_One sex_Male only2
5602	ONLI_0703	HILICPOS	R-Butyrylcarnitine	0.174395	1	0.999291	0.878736	37	5	0.00536191	0.357378	0.0240749	0.0597124	0.445591	0.270017	0.00691987	1.22612	0.180966	1.0686	0.00822546	1.40146	0.491729	0.244966	1.39831	1.31209	1.49269	0.235382	-0.371757	0.334803	0.935862	-0.0388981	0.966485	C8a	One sex_Male only
5611	ONLI_0704	HILICPOS	S-Cotinine N-oxide	1.07355e-07	1	0.950373	0.555538	31	5	0.00396208	0.00155589	0.00108289	0.0503568	0.00331362	0.073313	0.663954	0.208628	0.018876	1.88933	0.0598311	-0.886948	0.178015	0.501563	1.41746	2.20938	0.877663	0.751713	-0.100638	0.823842	0.0130343	-2.87691	0.0871951	C8a	One sex_Female only
5634	ONLI_0706	HILICPOS	2-Indolinone	9.86074e-06	1	0.999898	0.999913	40	6	1.82087e-05	1.32156e-07	0.698931	0.00286969	5.81783e-07	0.868962	0.00130809	1.32349	0.0112169	1.21585	0.00124922	1.43114	0.133923	0.123048	2.44841	2.37274	2.6325	2.4496e-06	-1.18837	1.09056e-05	0.081829	-0.973078	0.191138	C8a	Genotype effect with no sex effect(real)
5651	ONLI_0708	HILICPOS	4-Hydroxynonenal	0.655115	1	0.990797	0.885729	38	6	0.0178024	0.316028	0.0618813	0.113131	0.401661	0.358548	0.0213562	0.976781	0.2137	0.678208	0.0559961	1.27535	0.544969	0.495676	1.22926	1.1883	1.27276	0.197073	-0.372522	0.289726	0.850059	0.224622	0.913843	C8a	Genotype effect with no sex effect(real)
5662	ONLI_0710	HILICPOS	5-Hydroxytryptophol	1.19496e-07	1	0.967099	0.98632	34	6	0.505391	0.023791	0.0245752	0.762694	0.0405786	0.270017	0.518982	0.284038	0.0669184	1.04039	0.440268	-0.472313	0.333574	0.84484	1.59038	2.3184	0.414723	0.179375	-0.441977	0.267704	0.0138607	-1.95468	0.0876368	C8a	Interaction_cannot classify2
5712	ONLI_0720	HILICPOS	Arg-Ser	0.0474914	1	0.850637	0.814699	22	6	0.0100762	0.172553	0.0412619	0.0835792	0.235246	0.311763	0.0140355	1.06679	0.001572	1.81526	0.606284	0.328366	0.0589873	0.916568	1.24168	1.46526	1.01741	0.768814	-0.110471	0.835621	0.0239599	-1.59737	0.111718	C8a	One sex_Female only
5731	ONLI_0729	HILICPOS	Glu-Arg	0.31882	1	0.829451	0.761	40	5	0.00553173	0.501346	0.0312695	0.0597124	0.584409	0.296872	0.00700781	1.22253	0.0846177	1.05099	0.0332597	1.52785	0.376716	0.391746	1.32242	1.24492	1.44941	0.507328	0.191998	0.615037	0.542784	0.668856	0.67999	C8a	One sex_Male only
5761	ONLI_0732	HILICPOS	Glu-Phe	0.313669	1	0.958091	0.919707	39	6	0.00218532	0.0437967	0.382024	0.0351435	0.0684758	0.691793	0.00445395	1.18655	0.0199151	1.51577	0.085068	0.8728	0.180381	0.55913	1.3527	1.45565	1.2686	0.0462916	0.603759	0.0816058	0.894984	-0.0392128	0.940367	C8a	Genotype effect with no sex effect(real)
5774	ONLI_0733	HILICPOS	Glycerophosphocholine	0.2472	1	0.23322	0.707378	40	5	0.00121255	3.53932e-05	0.831402	0.0272997	9.96065e-05	0.91373	0.0144631	1.11701	0.019003	1.30931	0.0414011	1.15573	0.178015	0.450947	1.3421	1.39774	1.35728	0.000251807	-1.00153	0.000737636	0.191865	-1.15511	0.332991	C8a	Genotype effect with no sex effect(real)
5781	ONLI_0734	HILICPOS	Glycyl-leucine	0.132327	1	0.953972	0.990279	39	5	0.0070348	0.000275679	0.160811	0.0676027	0.00067886	0.510998	0.034682	0.974017	0.00215441	1.68131	0.296846	0.621858	0.0594377	0.787543	1.25368	1.46864	1.11722	0.00379707	-0.821544	0.00842844	0.0254189	-1.881	0.112368	C8a	Genotype effect with no sex effect(real)
5803	ONLI_0739	HILICPOS	Isovaleryl-L-carnitine	0.00413655	1	0.991338	0.824663	39	6	0.000740851	0.00460656	0.299533	0.0194597	0.00905229	0.617886	0.00230119	1.26308	0.00386272	1.61464	0.102387	0.895961	0.0726136	0.571456	1.36912	1.51162	1.20255	0.0324461	-0.606577	0.0591841	0.0259037	-1.32525	0.11277	C8a	Genotype effect with no sex effect(real)
5852	ONLI_0746	HILICPOS	L-Homocitrulline	0.011933	1	0.994022	0.982296	39	6	0.0502869	0.00246194	0.0296651	0.193298	0.00500002	0.295159	0.305212	0.445542	0.0342267	1.25896	0.483667	-0.381247	0.226644	0.863537	1.16222	1.36055	0.932971	0.0700277	-0.521419	0.118671	0.0454631	-2.16163	0.137788	C8a	Interaction_One sex_Female only2
5861	ONLI_0747	HILICPOS	Linoleoylcarnitine	0.122229	1	0.550006	0.896094	38	6	0.0204767	0.3554	0.136968	0.117274	0.443827	0.483994	0.0243909	-0.956563	0.0443396	-1.52796	0.316946	-0.363478	0.263548	0.797747	0.679442	0.543985	0.852019	0.17375	-0.412114	0.260791	0.408185	0.752367	0.564476	C8a	Genotype effect with no sex effect(real)
587	ONLI_0749	HILICPOS	Lys-Gly	2.32264e-06	1	0.746927	0.912193	38	4	0.000618076	0.147991	0.7686	0.0167946	0.205406	0.896624	0.00089785	1.62575	0.0245295	1.50805	0.0151148	1.76172	0.189028	0.313433	1.9347	2.11995	1.80837	0.232589	0.347144	0.331984	0.279177	0.600813	0.440865	C8a	Genotype effect with no sex effect(real)
5892	ONLI_0751	HILICPOS	N-.alpha.-Acetyl-L-arginine	0.165181	1	0.675562	0.441939	40	6	0.00842225	0.127957	0.597958	0.0729311	0.180699	0.819319	0.0103972	1.07744	0.0419127	1.27954	0.120641	0.875336	0.256025	0.601442	1.25965	1.33867	1.1898	0.134682	0.451275	0.207689	0.939246	0.0470665	0.966485	C8a	Genotype effect with no sex effect(real)
5901	ONLI_0752	HILICPOS	N.alpha.-Acetyl-L-lysine	0.132327	1	0.953972	0.990279	39	5	0.0070348	0.000275679	0.160811	0.0676027	0.00067886	0.510998	0.034682	0.974017	0.00215441	1.68131	0.296846	0.621858	0.0594377	0.787543	1.25368	1.46864	1.11722	0.00379707	-0.821544	0.00842844	0.0254189	-1.881	0.112368	C8a	Genotype effect with no sex effect(real)
5912	ONLI_0753	HILICPOS	N.alpha.-Methyl-L-lysine	0.299865	1	0.854502	0.710552	39	5	4.66126e-05	0.200368	0.471837	0.00524725	0.270359	0.754174	7.63716e-05	1.70977	0.00189514	2.0592	0.0101713	1.5128	0.0594377	0.258549	1.48351	1.64321	1.38306	0.369224	-0.247689	0.475406	0.039834	-0.794089	0.131234	C8a	Genotype effect with no sex effect(real)
5921	ONLI_0754	HILICPOS	N-Acetyl-L-carnosine	0.00246908	1	0.772919	0.669794	34	6	0.00523711	2.47282e-11	0.537064	0.0597124	3.12393e-10	0.793419	0.195039	0.565939	0.012939	0.856292	0.161749	0.560494	0.149941	0.68358	1.28463	1.50275	1.36575	7.87686e-09	1.61448	7.38924e-08	0.00107308	1.31868	0.0717091	C8a	Genotype effect with no sex effect(real)
5932	ONLI_0756	HILICPOS	N-alpha-Acetyl-L-ornithine	0.0612248	1	0.920146	0.999703	39	6	0.00137483	0.00817061	0.485168	0.0292802	0.015185	0.759332	0.00351746	1.21461	0.0157902	1.45453	0.0671178	0.959321	0.168077	0.516364	1.33784	1.41798	1.24079	0.0333637	-0.599382	0.0605775	0.182308	-1.09459	0.325021	C8a	Genotype effect with no sex effect(real)
5941	ONLI_0757	HILICPOS	NEPSILON,NEPSILON,NEPSILON-TRIMETHYLLYSINE	0.000535707	1	0.684183	0.96195	36	5	0.0163408	0.6574	0.096819	0.109123	0.731335	0.414638	0.0199583	1.06975	0.206216	1.17072	0.00209273	1.0527	0.536297	0.18323	1.16802	1.21712	1.15917	0.556852	-0.193867	0.658857	0.487266	-0.311893	0.632563	C8a	Genotype effect with no sex effect(real)
5982	ONLI_0765	HILICPOS	Pyridoxal	3.61095e-05	1	0.996307	0.458041	39	6	0.0444146	8.1589e-10	0.0610995	0.179481	5.84474e-09	0.358548	0.207846	0.545592	0.0105783	1.06608	0.885943	0.0584155	0.12913	0.979134	1.40878	1.66856	0.988942	2.4519e-07	-1.29896	1.40031e-06	0.00454438	-2.30662	0.0717091	C8a	Genotype effect with no sex effect(real)
599	ONLI_0766	HILICPOS	Ser-Glu	0.411728	1	0.999998	0.998412	40	6	0.0157492	0.756001	0.0982138	0.107916	0.812727	0.417573	0.0188562	0.99332	0.2542	0.757598	0.0279204	1.22904	0.583994	0.391746	1.28693	1.21257	1.36108	0.931221	0.0273026	0.948065	0.0479339	0.498746	0.142588	C8a	Genotype effect with no sex effect(real)
602	ONLI_0770	HILICPOS	Ser-Tyr	2.26147e-05	1	0.82678	0.996636	36	5	9.92486e-05	0.00214176	0.0760168	0.00782079	0.00442968	0.383982	0.000485668	1.53727	0.00075755	2.24443	0.0465092	0.999025	0.0518433	0.469863	2.06316	3.0419	1.61184	0.00138423	0.901991	0.00344091	0.304972	-0.343411	0.469371	C8a	Genotype effect with no sex effect(real)
6041	ONLI_0773	HILICPOS	Stachydrine	0.0748744	1	0.955306	0.622845	39	6	1.47704e-05	0.233389	0.344407	0.00286969	0.307543	0.673014	2.54204e-05	1.66458	0.00194102	1.98652	0.00450684	1.34758	0.0594377	0.211995	2.01248	2.19848	1.81023	0.480563	-0.192121	0.592619	0.014562	-0.83106	0.0882679	C8a	Genotype effect with no sex effect(real)
6052	ONLI_0774	HILICPOS	Stearoyl-L-carnitine	0.0260168	1	0.744167	0.999995	37	6	0.00760575	0.2299	0.0914348	0.0688888	0.304472	0.405322	0.00957932	-1.09133	0.0165627	-1.71132	0.292322	-0.430473	0.169152	0.783503	0.759246	0.614905	0.931303	0.10226	-0.504157	0.163449	0.234522	0.776689	0.388242	C8a	Genotype effect with no sex effect(real)
6061	ONLI_0776	HILICPOS	Thr-Ala	0.0217752	1	0.659197	0.857002	39	5	0.0160904	0.00761477	0.108358	0.109123	0.0142868	0.441266	0.0216935	1.05365	0.0106516	1.74985	0.397965	0.466708	0.12913	0.834426	1.24132	1.49644	1.06957	0.00353915	0.845174	0.00790044	0.64321	-0.437972	0.755365	C8a	Genotype effect with no sex effect(real)
609	ONLI_0781	HILICPOS	Tryptamine	0.145497	1	0.788679	0.259951	40	6	0.0360451	1.93098e-11	0.840551	0.158679	2.579e-10	0.916119	0.218351	0.532624	0.210246	0.482736	0.120762	0.582512	0.537902	0.601442	1.18836	1.15611	1.24422	1.3727e-09	-1.54523	1.86498e-08	0.00396828	-1.44546	0.0717091	C8a	Genotype effect with no sex effect(real)
615	ONLI_0792	HILICPOS	3-Hydroxyphenylacetic acid	0.188415	1	0.999999	0.999353	26	6	0.0239423	0.770645	0.159863	0.125504	0.825093	0.510998	0.0301241	0.942554	0.175141	0.979666	0.110671	0.900678	0.483845	0.597318	1.347	1.3462	1.34392	0.871224	-0.0619407	0.912932	0.848109	-0.140929	0.913843	C8a	Genotype effect with no sex effect(real)
616	ONLI_0793	HILICPOS	3-Hydroxyproline	0.0293096	1	0.275553	0.71946	40	6	0.0481651	1.49556e-11	0.897867	0.188826	2.17456e-10	0.942689	0.247796	-0.500597	0.215173	-0.468768	0.161802	-0.532426	0.545198	0.68358	0.799865	0.847752	0.776226	4.0925e-10	1.5455	1.26663e-08	0.0499485	1.48184	0.144174	C8a	Genotype effect with no sex effect(real)
617	ONLI_0795	HILICPOS	5-Aminovaleric acid	0.19066	1	0.77032	0.622235	39	6	0.0170591	0.0103475	0.0145103	0.110185	0.018831	0.213393	0.162488	0.603753	0.0239486	1.54908	0.467712	-0.34775	0.189028	0.855057	1.14727	1.3592	0.922033	0.429871	-0.240836	0.53768	0.000100748	-2.13767	0.0220135	C8a	One sex_Female only
619	ONLI_0799	HILICPOS	Betaine	0.19066	1	0.77032	0.622235	39	6	0.0170591	0.0103475	0.0145103	0.110185	0.018831	0.213393	0.162488	0.603753	0.0239486	1.54908	0.467712	-0.34775	0.189028	0.855057	1.14727	1.3592	0.922033	0.429871	-0.240836	0.53768	0.000100748	-2.13767	0.0220135	C8a	One sex_Female only
6214	ONLI_0802	HILICPOS	Cytosine	0.0133216	1	0.953876	0.957517	39	6	0.000139064	0.014357	0.867906	0.00829572	0.0253095	0.925243	0.000500618	1.41934	0.0258309	1.36981	0.0028989	1.48448	0.191098	0.190361	1.68511	1.64661	1.75072	0.0293066	-0.608966	0.0543378	0.416607	-0.494296	0.571125	C8a	Genotype effect with no sex effect(real)
6221	ONLI_0803	HILICPOS	Galactosamine	0.977953	1	0.986612	0.980864	39	6	0.868273	0.0098581	0.0422747	0.935186	0.0182033	0.311763	0.871947	0.0704652	0.437252	-0.416923	0.393182	0.54271	0.714468	0.834426	1.01607	0.939253	1.08396	0.0554762	0.59061	0.0954263	0.0958514	1.55024	0.208074	C8a	Interaction_cannot classify2
6252	ONLI_0809	HILICPOS	N-Acetylcytidine	0.112875	1	0.895233	0.995228	40	6	0.00334425	2.35373e-08	0.379658	0.047914	1.2532e-07	0.690925	0.0375691	0.88554	0.0057241	1.13732	0.191168	0.633762	0.0933162	0.716654	1.31217	1.34863	1.25733	2.00921e-06	-1.22887	9.20498e-06	0.0192709	-1.73243	0.101237	C8a	Genotype effect with no sex effect(real)
6271	ONLI_0811	HILICPOS	N-Acetylphenylalanine	3.38552e-05	1	0.0477835	0.173963	38	5	0.00157003	0.235847	0.179413	0.0310632	0.310262	0.538707	0.00215047	1.37489	0.00107935	2.04344	0.136071	0.952211	0.0518433	0.63483	1.84504	2.57796	1.34048	0.527377	-0.187406	0.634463	0.0139018	-1.27863	0.0876368	C8a	Genotype effect with no sex effect(real)
629	ONLI_0813	HILICPOS	N-Methyltyrosine	0.115557	1	0.99496	0.931614	37	5	0.0259558	0.791599	0.138062	0.131324	0.842436	0.485682	0.0307881	0.996618	0.0775073	1.3708	0.217991	0.730387	0.361141	0.735274	1.37182	1.62282	1.20394	0.71264	0.116403	0.793164	0.585332	-0.524008	0.714319	C8a	Genotype effect with no sex effect(real)
631	ONLI_0815	HILICPOS	Retinoic acid	1.35052e-07	1	0.764704	0.587189	30	5	0.101084	0.0420566	0.0407569	0.296928	0.0662348	0.311763	0.114073	0.747288	0.00256931	1.80799	0.874964	0.104234	0.0613521	0.976589	1.783	3.1847	0.833962	0.259291	-0.384493	0.360356	0.00346711	-2.08825	0.0717091	C8a	Interaction_One sex_Female only2
633	ONLI_0818	HILICPOS	3-Ureidopropionic acid	0.0131658	1	0.620302	0.990273	39	6	0.0016935	0.000279053	0.651879	0.0313093	0.000685026	0.846262	0.0085693	1.10414	0.0518213	0.942965	0.024907	1.23939	0.287572	0.377436	1.70861	1.48386	2.0776	0.000243785	-1.01065	0.000716801	0.359611	-0.714226	0.518999	C8a	Genotype effect with no sex effect(real)
6351	ONLI_0820	HILICPOS	4-Aminobenzoic acid	1.09454e-05	1	0.919941	0.946214	36	5	0.00839872	0.0250186	0.0086781	0.0729311	0.0421254	0.170959	0.12457	0.71996	0.0138736	2.08161	0.683084	-0.198434	0.156177	0.932878	1.50623	2.34725	0.941571	0.837167	0.063755	0.886677	0.0275136	-2.21629	0.11415	C8a	One sex_Female only
6362	ONLI_0821	HILICPOS	4-Guanidinobutyric acid	0.00045974	1	0.95642	0.976522	37	5	0.00196979	0.800779	0.260387	0.0323374	0.849279	0.594075	0.00268466	1.34854	0.00824436	1.89906	0.107567	0.964137	0.107	0.588631	1.79715	2.31923	1.46251	0.556568	0.175518	0.658857	0.401527	-0.7594	0.561786	C8a	Genotype effect with no sex effect(real)
6374	ONLI_0822	HILICPOS	5'-Methylthioadenosine	0.000308666	1	0.962479	0.912065	37	6	1.72568e-06	0.459001	0.17099	0.000453279	0.54719	0.530473	3.42611e-06	1.79406	0.000783187	2.22174	0.000586143	1.3428	0.0518433	0.0896076	2.16233	2.46703	1.86762	0.275069	0.290799	0.375657	0.0422287	-0.58814	0.134441	C8a	Genotype effect with no sex effect(real)
6383	ONLI_0823	HILICPOS	6-Methyladenosine	0.00915062	1	0.992173	0.635813	39	6	0.00181993	0.499772	0.478484	0.0313093	0.583437	0.759332	0.00243972	1.25654	0.0255449	1.52345	0.0527981	0.986997	0.191098	0.495676	1.60971	1.69828	1.51476	0.727126	-0.103038	0.807008	0.366049	-0.639488	0.523496	C8a	Genotype effect with no sex effect(real)
6463	ONLI_0837	HILICPOS	Aspartic acid	0.787775	1	0.928872	0.898207	36	5	0.00420808	0.0383807	0.00564689	0.0519987	0.0609758	0.135929	0.00553868	1.25689	0.080783	1.24951	0.0381062	1.16724	0.36776	0.428967	1.26523	1.28724	1.22804	0.0624354	0.567498	0.106492	0.522544	0.485229	0.662001	C8a	One sex_Male only
6473	ONLI_0838	HILICPOS	Biliverdin	0.000420033	1	0.990921	0.910782	38	6	0.00540574	0.00718091	0.0309883	0.0597124	0.0135866	0.296872	0.0296774	0.925887	0.00478016	1.74374	0.773634	0.151728	0.0818861	0.957544	1.6561	2.73663	1.05687	0.00536265	0.830229	0.0114831	0.316022	-0.761786	0.478895	C8a	One sex_Female only
6521	ONLI_0844	HILICPOS	Citrulline	0.184243	1	0.837117	0.882282	38	5	0.014889	0.00374664	0.515452	0.10469	0.00745544	0.780716	0.0465942	0.921344	0.309071	0.679054	0.0327149	1.19405	0.626087	0.391746	1.14748	1.08287	1.22472	0.00274743	-0.905307	0.00642426	0.593483	-0.390314	0.717278	C8a	Genotype effect with no sex effect(real)
6572	ONLI_0850	HILICPOS	gamma-Aminobutyric Acid GABA	6.147e-05	1	0.92494	0.963532	39	5	0.00234405	0.000169579	0.251516	0.0369422	0.000442477	0.579516	0.0169689	1.09296	0.00897258	1.67638	0.114951	0.828605	0.114039	0.599874	1.42817	1.80283	1.16967	0.00219135	-0.857514	0.00518553	0.0397182	-1.70529	0.131234	C8a	Genotype effect with no sex effect(real)
6582	ONLI_0851	HILICPOS	gamma-Glutamylleucine	0.099561	1	0.997345	0.964546	39	6	0.00129413	0.363065	0.933856	0.028327	0.450544	0.966989	0.00176544	1.29214	0.0654545	1.25811	0.00698852	1.32041	0.330629	0.239433	1.36757	1.33699	1.39641	0.455699	0.224899	0.567284	0.492342	0.287195	0.636054	C8a	Genotype effect with no sex effect(real)
659	ONLI_0852	HILICPOS	gamma-Glutamylmethionine	0.902882	1	0.94496	0.999868	37	6	0.00562923	0.461537	0.00833438	0.0599436	0.548554	0.169756	0.00720341	1.12858	0.459874	0.416887	0.00341591	1.82928	0.724761	0.207057	1.37075	1.16425	1.59897	0.175479	-0.406607	0.262837	0.206876	1.00579	0.352091	C8a	One sex_Male only
660	ONLI_0853	HILICPOS	Glu-Gln	0.101995	1	0.869625	0.658686	40	6	0.0466989	0.368524	0.133801	0.186701	0.456599	0.48173	0.0530689	0.826448	0.458912	0.480455	0.0421783	1.17244	0.724761	0.450947	1.18272	1.07384	1.30085	0.272279	-0.346233	0.372493	0.538936	0.345753	0.676245	C8a	Genotype effect with no sex effect(real)
6612	ONLI_0854	HILICPOS	Glutamic acid	0.716576	1	0.967957	0.999994	39	5	0.0392803	1.74066e-07	0.830252	0.167226	7.53648e-07	0.91373	0.0756499	0.825649	0.2672	0.598123	0.110593	0.738419	0.59647	0.597318	1.21414	1.19207	1.15749	2.16602e-06	1.27059	9.86603e-06	0.123352	1.41088	0.249875	C8a	Genotype effect with no sex effect(real)
6631	ONLI_0858	HILICPOS	Glu-Thr	0.869783	1	0.654983	0.350722	40	6	0.00505192	0.037455	0.00120948	0.0594167	0.0598708	0.073313	0.00639585	1.14101	0.403539	0.53188	0.000360545	1.75014	0.701255	0.0710275	1.29267	1.11134	1.4586	0.13924	0.422275	0.213465	0.0138779	1.64054	0.0876368	C8a	One sex_Male only
6652	ONLI_0860	HILICPOS	Guanosine	4.07011e-05	1	0.28741	0.930887	25	6	0.00349739	0.384022	0.0407862	0.0483499	0.47209	0.311763	0.00509745	-1.18868	0.020866	-1.93661	0.236403	-0.447573	0.180685	0.737718	0.305233	0.110019	0.560187	0.924747	-0.0341444	0.946365	0.0152407	1.45489	0.0892945	C8a	One sex_Female only
6671	ONLI_0862	HILICPOS	Histidine	0.458275	1	0.7527	0.592021	38	5	0.0018832	0.0129564	0.00467931	0.0315737	0.022943	0.135929	0.0364366	0.966143	0.00306261	2.3579	0.964072	-0.0231425	0.0638534	0.997491	1.18302	1.44576	1.00984	0.085567	0.500371	0.140766	0.0958416	-1.88067	0.208074	C8a	One sex_Female only
675	ONLI_0875	HILICPOS	N-Acetylmethionine	0.00141243	1	0.767913	0.315734	38	6	0.00176023	0.0713988	0.0297688	0.0313093	0.107576	0.295159	0.00643201	1.14204	0.00238958	1.96006	0.541767	0.324012	0.0594377	0.894995	1.47486	1.84909	1.08988	0.933379	0.0245709	0.949036	0.0310934	-1.61148	0.120106	C8a	One sex_Female only
676	ONLI_0876	HILICPOS	N-Acetyltryptophan	0.0133043	1	0.753259	0.75104	38	6	0.0140601	0.00015237	0.348695	0.102587	0.000401565	0.673014	0.0408292	0.873727	0.0213958	1.19419	0.30873	0.553263	0.183259	0.789869	1.25731	1.37488	1.11388	0.00222047	-0.88391	0.00523872	0.0486892	-1.52484	0.142588	C8a	Genotype effect with no sex effect(real)
679	ONLI_0879	HILICPOS	N-Methyllysine	0.0789311	1	0.440165	0.330327	37	6	0.00276779	1.9161e-12	0.0856335	0.0403893	9.31693e-11	0.401662	0.0670599	0.787286	0.000434777	1.11747	0.377072	0.341034	0.0518433	0.834426	1.3717	1.46661	1.10455	1.88001e-09	-1.43155	2.27985e-08	0.00303164	-2.20798	0.0717091	C8a	Genotype effect with no sex effect(real)
681	ONLI_0882	HILICPOS	Pantothenic acid	0.0135444	1	0.779295	0.798579	40	6	0.000121322	3.73503e-13	0.923757	0.00829572	7.35801e-11	0.959052	0.0262512	0.943128	0.0124541	0.921504	0.00839352	0.964753	0.146475	0.244966	1.39933	1.35246	1.48728	2.3409e-10	-1.51923	1.26663e-08	0.00120424	-1.47598	0.0717091	C8a	Genotype effect with no sex effect(real)
6823	ONLI_0884	HILICPOS	Pipecolic acid	8.83691e-09	1	0.792546	0.570195	35	6	1.56037e-07	8.52602e-07	0.641906	0.000122957	3.11042e-06	0.840766	3.4916e-05	1.63827	0.00095411	1.71055	6.62569e-05	1.47411	0.0518433	0.030453	2.45307	1.81909	2.89352	1.44459e-05	1.07194	5.34429e-05	0.0806178	0.835493	0.190771	C8a	Genotype effect with no sex effect(real)
6854	ONLI_0887	HILICPOS	Propionylcarnitine	3.03414e-07	1	0.367571	0.380675	39	6	0.000461938	0.0561469	0.240036	0.0145603	0.0863126	0.576371	0.000664516	1.39221	0.0009359	1.80276	0.100716	0.972402	0.0518433	0.571456	1.66051	2.07281	1.21244	0.202964	-0.361239	0.297278	0.0290687	-1.1916	0.117046	C8a	Genotype effect with no sex effect(real)
686	ONLI_0888	HILICPOS	Pyridoxamine	0.0165095	1	0.86758	0.867374	40	6	0.00721699	0.000178083	0.776882	0.0685179	0.000461611	0.897629	0.0234946	0.960257	0.0570776	1.05755	0.0927471	0.862959	0.304314	0.571456	1.35061	1.37703	1.31447	0.00127805	-0.912446	0.00319024	0.136784	-1.10704	0.267913	C8a	Genotype effect with no sex effect(real)
6872	ONLI_0889	HILICPOS	S-Adenosyl-homocysteine	5.19421e-08	1	0.832558	0.755125	32	5	0.0191079	0.0120391	0.0208944	0.114939	0.0215996	0.255983	0.170941	0.648058	0.015616	1.84997	0.851966	-0.101441	0.168077	0.973929	2.2722	4.20586	0.697449	0.344127	-0.310659	0.450518	0.0101829	-2.26207	0.0830871	C8a	One sex_Female only
690	ONLI_0893	HILICPOS	Taurine	0.215785	1	0.586812	0.305638	39	5	0.000201469	0.000404242	0.00103522	0.0105838	0.000950873	0.073313	0.015739	1.1047	0.000968753	2.56133	0.985707	0.00785573	0.0518433	0.99959	1.35352	1.97697	0.981953	0.00218025	0.865528	0.00518032	0.00767269	-1.68794	0.0785205	C8a	One sex_Female only
6913	ONLI_0896	HILICPOS	TMAO	8.19446e-05	1	0.215792	0.221749	37	6	0.0109563	1.5454e-11	0.85031	0.0863359	2.17456e-10	0.918032	0.170834	0.594125	0.120966	0.571553	0.0657068	0.659412	0.418676	0.516364	1.49367	1.53493	1.44923	8.67708e-10	-1.58043	1.48642e-08	0.0026135	-1.49257	0.0717091	C8a	Genotype effect with no sex effect(real)
6931	ONLI_0899	HILICPOS	Valine	0.19066	1	0.77032	0.622235	39	6	0.0170591	0.0103475	0.0145103	0.110185	0.018831	0.213393	0.162488	0.603753	0.0239486	1.54908	0.467712	-0.34775	0.189028	0.855057	1.14727	1.3592	0.922033	0.429871	-0.240836	0.53768	0.000100748	-2.13767	0.0220135	C8a	One sex_Female only
695	ONLI_0914	HILICNEG	2,6-Dihydroxybenzoic acid	0.255151	1	0.573592	0.419886	37	5	0.0205379	0.631173	0.125055	0.117274	0.705866	0.467943	0.0246645	1.03422	0.0884047	1.18575	0.185889	0.796095	0.381636	0.704232	1.24571	1.28621	1.18394	0.824325	-0.0728799	0.877795	0.0829659	-0.46253	0.192853	C8a	Genotype effect with no sex effect(real)
6961	ONLI_0916	HILICNEG	2-Deoxyuridine	0.999065	1	0.584856	0.878178	36	6	0.505559	0.0739178	0.0494454	0.762694	0.110736	0.317289	0.518487	-0.283181	0.283327	0.52992	0.113589	-1.09628	0.610005	0.599874	0.886143	1.16756	0.569197	0.37513	-0.291097	0.481437	0.00258374	-1.9173	0.0717091	C8a	Interaction_cannot classify2
6982	ONLI_0918	HILICNEG	2-Hydroxy-4-methylpentanoic acid	0.00840915	1	0.968324	0.21722	36	6	0.0304612	0.000239585	0.0147442	0.144599	0.000599343	0.213393	0.416346	0.355917	0.000453513	1.2649	0.461798	-0.48846	0.0518433	0.855057	1.43087	3.002	0.93152	1.52969e-05	1.163	5.63269e-05	0.66695	-0.590364	0.779124	C8a	One sex_Female only
7012	ONLI_0923	HILICNEG	3-Hydroxy-4-methoxybenzoic acid	2.92465e-07	1	0.921746	0.792864	38	5	0.0190582	0.00161175	0.0374384	0.114939	0.00340499	0.311763	0.142327	0.686834	0.0178367	1.77137	0.847978	0.0930102	0.173522	0.973929	2.09839	3.40329	0.942366	0.0375686	-0.613695	0.0674352	0.015703	-2.29205	0.089529	C8a	One sex_Female only
706	ONLI_0932	HILICNEG	4-Hydroxybenzoic acid	0.000177051	1	0.931148	0.344148	37	6	0.818929	0.0004318	0.0439159	0.917946	0.00100967	0.311763	0.824161	-0.0974834	0.285232	0.638314	0.0873221	-0.81259	0.612433	0.564015	1.0856	1.35161	0.648555	0.0102093	-0.765556	0.0207344	0.0144548	-2.21646	0.0882679	C8a	Interaction_cannot classify2
7082	ONLI_0935	HILICNEG	4-Pyridoxic acid	9.42315e-05	1	0.88565	0.999985	35	6	0.00670328	5.46295e-06	0.005435	0.0660273	1.73581e-05	0.135929	0.243075	0.50988	0.00684007	1.43223	0.405753	-0.388838	0.101698	0.834426	1.58492	2.12857	0.823227	0.00353434	-0.826945	0.00790044	0.000726911	-2.64801	0.0717091	C8a	One sex_Female only
7161	ONLI_0968	HILICNEG	Galactonic acid	3.99918e-13	1	0.743867	0.536218	33	5	0.00258127	0.000281035	0.000611238	0.0386958	0.000687749	0.0602069	0.885492	0.0689313	0.00828296	1.81336	0.0706656	-1.00772	0.107	0.516364	15.7993	34.5337	0.546111	0.299474	-0.294619	0.406171	0.0505563	-3.1157	0.144867	C8a	One sex_Female only
7181	ONLI_0972	HILICNEG	Gentisinic acid	0.167635	1	0.874102	0.519385	37	6	0.0254151	2.79253e-06	0.00713055	0.130046	9.32422e-06	0.15608	0.719022	-0.157757	0.143427	0.765735	0.0285331	-1.00886	0.453031	0.391746	1.00381	1.33547	0.524831	0.0012019	-0.89283	0.00302586	0.0060505	-2.66742	0.0717091	C8a	One sex_Male only
7211	ONLI_0993	HILICNEG	Homovanillic acid	0.000166195	1	0.95887	0.574295	29	6	0.0297613	0.0118354	0.00934811	0.142999	0.0212929	0.175388	0.689126	0.178829	0.0669267	1.22533	0.0935492	-0.849369	0.333574	0.571456	1.40909	2.16466	0.51765	0.757237	-0.106154	0.827604	0.0376877	-2.18085	0.131234	C8a	cannot classify
7251	ONLI_1010	HILICNEG	Mannitol	0.0924676	1	0.790862	0.798183	33	6	0.014804	0.243881	0.0931264	0.10469	0.318176	0.408166	0.0183714	1.00529	0.019641	1.64059	0.454529	0.353969	0.179967	0.852783	1.25963	1.4085	1.11846	0.0841877	0.529087	0.139077	0.474995	-0.757531	0.623421	C8a	Genotype effect with no sex effect(real)
7331	ONLI_1031	HILICNEG	Phenylpyruvic acid	2.4351e-05	1	0.870514	0.747938	37	6	0.0288999	0.0158733	0.040452	0.140724	0.0277342	0.311763	0.999994	3.37226e-06	0.10532	1.07345	0.0500816	-1.07402	0.409613	0.485054	1.21699	1.89264	0.451868	0.943247	-0.0211611	0.957834	0.077052	-2.16864	0.186248	C8a	cannot classify
7431	ONLI_1064	BileAcid_Steroids	corticosterone	6.34178e-06	1	0.59828	0.696461	37	6	0.0337397	0.00715304	0.0249668	0.151062	0.0135822	0.270017	0.203071	0.553051	0.00053	1.39741	0.642875	-0.322148	0.0518433	0.916568	1.95342	3.52467	0.382005	0.219867	-0.380335	0.317298	0.0060592	-2.0999	0.0717091	C8a	One sex_Female only
7471	ONLI_1071	BileAcid_Steroids	cortexone	0.00101787	1	0.920192	0.861051	20	6	0.00630504	0.00779783	0.00569245	0.0628908	0.0145609	0.135929	0.10831	-0.727448	0.664377	0.256626	0.00502595	-1.71152	0.843043	0.220025	0.774315	1.45632	0.0763233	0.731221	-0.113556	0.808554	0.0840897	-2.0817	0.194443	C8a	One sex_Male only
755	ONLI_1092	BileAcid_Steroids	Tauro-omega-Muricholic acid	0.0454551	1	0.581561	0.829798	36	6	0.00115354	2.8822e-05	0.542701	0.0267349	8.28896e-05	0.79571	0.00979141	-1.08948	0.0687835	-0.874445	0.0125209	-1.24549	0.338759	0.29151	0.492409	0.568167	0.377107	0.000152174	-1.06267	0.000461204	0.0244142	-1.43371	0.112181	C8a	Genotype effect with no sex effect(real)
7581	ONLI_1095	BileAcid_Steroids	Tauroursodeoxycholic acid	0.00120914	1	0.226198	0.978824	22	6	0.000132025	1.24156e-05	0.0163677	0.00829572	3.6919e-05	0.222375	0.00738004	-1.15112	0.00112549	-1.73318	0.236024	-0.442132	0.0518433	0.737718	0.266351	0.198057	0.594806	5.92491e-06	-1.39611	2.39427e-05	0.88624	-0.10506	0.936136	C8a	One sex_Female only
7601	ONLI_1097	BileAcid_Steroids	omega-Muricholic acid	0.00175383	1	0.999861	1	24	5	0.00514009	1.06907e-06	0.00117462	0.0595646	3.8292e-06	0.073313	0.736695	0.164972	0.0459389	0.918467	0.0292625	-1.19547	0.268766	0.391746	1.39593	1.61887	0.478362	0.00212946	-0.9208	0.00511589	0.00983024	-3.03474	0.0830871	C8a	Different direction
7631	ONLI_1101	BileAcid_Steroids	Glycocholic acid	6.93667e-06	1	0.681693	0.998476	28	6	0.0017344	1.2895e-09	0.000596138	0.0313093	8.75969e-09	0.0602069	0.402197	0.374033	0.103629	-0.632706	0.00457349	1.12791	0.406268	0.211995	0.956278	0.475953	5.66981	1.97961e-08	-1.77005	1.56581e-07	0.971632	-0.00943224	0.982028	C8a	One sex_Male only
770	ONLI_1108	BileAcid_Steroids	Glycodeoxycholic acid	0.0120744	1	0.449771	0.171337	19	6	0.0131802	0.0274505	0.0101238	0.0995626	0.0456812	0.185524	0.184481	-0.609651	0.0300009	-1.64859	0.442348	0.388957	0.211078	0.84484	0.531611	0.128694	1.32945	0.0846711	-0.76623	0.139583	0.064892	1.27131	0.168207	C8a	One sex_Female only
7821	ONLI_1138	Oxylipins	9,10-e-DiHO	0.00171281	1	0.980747	0.855612	38	6	0.0372309	0.0988587	0.0342037	0.162088	0.14426	0.307022	0.160284	0.607793	0.0365502	1.46419	0.628917	-0.248601	0.236078	0.916568	1.42436	2.00749	0.845061	0.685122	0.125588	0.770151	0.0932595	-1.5872	0.20585	C8a	One sex_Female only
7842	ONLI_1140	Oxylipins	9,10-DiHOME	0.657504	1	0.899481	0.663053	36	6	0.039309	0.0354738	0.082248	0.167226	0.0572815	0.400506	0.896469	0.0572141	0.0606313	1.10219	0.126909	-0.978993	0.312271	0.615946	0.996648	1.3152	0.695146	0.618249	0.157811	0.710252	0.0644973	-1.92337	0.167735	C8a	Genotype effect with no sex effect(real)
7851	ONLI_1141	Oxylipins	15,16-DiHODE	0.732224	1	0.999976	0.998864	37	6	0.0062542	0.00447916	0.00176077	0.0628908	0.00882394	0.0924989	0.580622	0.241982	0.00724229	1.50886	0.119548	-0.972505	0.101885	0.601442	1.08358	1.62642	0.673171	0.0399285	0.646121	0.0711848	0.0235233	-1.83524	0.11134	C8a	One sex_Female only
7862	ONLI_1142	Oxylipins	12,13-DiHODE	0.0635982	1	0.66444	0.958887	34	6	0.00993566	0.0114646	0.0254268	0.0832904	0.0207681	0.270017	0.55361	-0.260977	0.039474	0.950842	0.0430683	-1.44648	0.246476	0.450947	0.983952	1.31504	0.706781	0.166198	0.44741	0.25041	0.0396868	-1.94991	0.131234	C8a	Different direction
7871	ONLI_1143	Oxylipins	9,10-DiHODE	0.43986	1	0.908383	0.848469	38	6	0.0412653	0.0425907	0.0945613	0.172963	0.0667226	0.411008	0.801953	0.109771	0.0778835	1.14784	0.117606	-0.912494	0.361141	0.601442	1.08656	1.56831	0.662857	0.344394	0.300206	0.450518	0.043143	-1.76012	0.135106	C8a	Genotype effect with no sex effect(real)
7971	ONLI_1157	Oxylipins	9-HODE	0.0118743	1	0.684161	0.902856	37	6	0.0162535	0.0755645	0.0299653	0.109123	0.112774	0.295159	0.0706029	0.777674	0.0262595	1.63664	0.848082	-0.0826222	0.191473	0.973929	1.4464	1.94296	0.939595	0.874223	0.0494219	0.913644	0.0402418	-1.66984	0.131579	C8a	One sex_Female only
8061	ONLI_1167	Oxylipins	15-HEPE	0.00819733	0.999923	0.80426	0.988372	16	5	0.0312819	0.464307	0.111778	0.147114	0.549361	0.447808	0.0431666	-0.980229	0.0220984	-1.77559	0.498685	-0.443381	0.185256	0.872391	0.783663	0.676132	0.853299	0.927713	-0.0396283	0.946941	0.218262	1.29258	0.365729	C8a	Genotype effect with no sex effect(real)
813	ONLI_1175	Oxylipins	9-KODE	0.414327	1	0.679052	0.800695	39	6	0.0254053	0.289496	0.460695	0.130046	0.371535	0.742388	0.0298254	0.924034	0.0698844	1.21334	0.252015	0.629343	0.339932	0.750764	1.47103	1.59635	1.32756	0.500571	-0.209859	0.60966	0.253387	-0.793861	0.408761	C8a	Genotype effect with no sex effect(real)
8261	ONLI_1200	Oxylipins	10-Nitrolinoleate	3.48009e-08	1	0.999551	0.479599	25	6	0.000147386	3.84723e-07	7.13612e-05	0.00829572	1.54674e-06	0.0176026	0.126716	0.67935	0.000808743	1.57067	0.0693975	-0.816545	0.0518433	0.516364	0.961461	2.32553	0.341639	3.97694e-06	1.67937	1.67585e-05	0.0384713	-0.707843	0.131234	C8a	One sex_Female only
22	ONLI_0002	gctof	xylose	2.81516e-07	1	0.722148	0.838949	35	6	0.0260801	0.329266	0.0689799	0.247918	0.419017	0.863973	0.0310567	0.922196	0.396434	0.530603	0.0271106	1.32567	0.71905	0.613133	2.11658	1.86075	2.51427	0.188566	-0.415942	0.278091	0.684821	0.379128	0.821395	Cdk4	Genotype effect with no sex effect(real)
1310	ONLI_0017	gctof	sulfuric acid	0.00131316	1	0.999668	0.994401	38	6	0.00821529	0.514276	0.0552804	0.159691	0.615709	0.863973	0.0102523	1.08122	0.164572	0.954378	0.0210005	1.20806	0.517319	0.576221	1.99023	1.94612	2.04426	0.457777	-0.224564	0.566122	0.973624	0.0291222	0.987222	Cdk4	Genotype effect with no sex effect(real)
21	ONLI_0026	gctof	raffinose	0.0977989	0.998534	0.888137	0.851887	40	6	0.00640769	0.988134	0.261287	0.148696	0.991906	0.863973	0.0080175	1.10687	0.0222013	1.54169	0.199704	0.672046	0.426045	0.980671	1.78274	2.19866	1.38438	0.715997	0.109528	0.800588	0.207503	-0.760117	0.403739	Cdk4	Genotype effect with no sex effect(real)
257	ONLI_0031	gctof	pimelic acid	0.620472	1	0.971362	0.835345	38	6	0.00579207	0.39561	0.0354784	0.142811	0.49001	0.863973	0.00735958	1.12479	0.0685698	1.11236	0.0560524	1.1507	0.426045	0.788038	1.33844	1.37384	1.31344	0.390686	0.256079	0.499596	0.746206	0.294421	0.849577	Cdk4	cannot classify
329	ONLI_0040	gctof	oxoproline	0.925247	1	0.86334	0.993715	39	6	0.00166009	0.926457	0.0157122	0.0689375	0.941817	0.827474	0.00223595	1.26627	0.0761571	1.0098	0.0159251	1.52187	0.426045	0.502595	1.19133	1.15614	1.22656	0.908622	-0.0341324	0.935905	0.465634	0.47793	0.652194	Cdk4	One sex_Male only
431	ONLI_0053	gctof	lyxitol	0.426282	1	0.894039	0.766611	40	6	0.0112533	0.346667	0.347175	0.168055	0.437632	0.863973	0.0136961	1.03942	0.0290023	1.40621	0.233461	0.672627	0.426045	0.980671	1.32467	1.4218	1.22488	0.617432	-0.154023	0.714302	0.0536239	-0.887609	0.199572	Cdk4	Genotype effect with no sex effect(real)
4510	ONLI_0057	gctof	lauric acid	0.714168	1	0.959213	0.952872	40	6	0.00410005	0.00951574	0.00896703	0.11155	0.0179187	0.827474	0.142773	0.631854	0.285457	-0.525844	0.00876555	1.78955	0.635621	0.384223	1.21295	0.823062	1.60802	0.77659	-0.0836375	0.847482	0.00617843	2.23176	0.12187	Cdk4	One sex_Male only
607	ONLI_0072	gctof	hippuric acid	1.62167e-05	1	0.839691	0.619343	40	6	0.0237156	0.79781	0.214396	0.236092	0.846989	0.863973	0.0278369	0.933906	0.0506375	1.42789	0.345329	0.43992	0.426045	0.980671	2.23279	3.0303	1.5543	0.521313	0.198121	0.6251	0.218881	-0.78985	0.411537	Cdk4	Genotype effect with no sex effect(real)
6210	ONLI_0074	gctof	hexose	0.199029	1	0.874386	0.885715	34	6	0.0183375	0.106797	0.035435	0.212769	0.160807	0.863973	0.022365	0.974593	0.133649	0.932587	0.0814433	1.0166	0.481501	0.880257	1.58484	1.48033	1.66491	0.126471	0.472021	0.195275	0.592164	0.556033	0.757243	Cdk4	cannot classify
65	ONLI_0078	gctof	glycolic acid	0.809241	1	0.867034	0.997259	39	6	0.019422	0.457631	0.0786791	0.219617	0.55464	0.863973	0.0231051	0.963807	0.245485	0.64258	0.0530338	1.29289	0.608718	0.788038	1.29079	1.19263	1.40219	0.330661	-0.306465	0.438473	0.527277	0.343847	0.709934	Cdk4	Genotype effect with no sex effect(real)
668	ONLI_0079	gctof	glycine	0.657536	1	0.993557	0.96549	40	6	0.037503	0.020855	0.840239	0.276247	0.0374964	0.963821	0.0569145	0.814002	0.101175	0.891018	0.238549	0.736985	0.433842	0.980671	1.14921	1.16628	1.13378	0.0293753	0.661995	0.0541521	0.477128	0.507962	0.661768	Cdk4	Genotype effect with no sex effect(real)
761	ONLI_0091	gctof	ethanolamine	0.0616294	1	0.999919	0.971656	38	6	0.133233	0.0162881	0.0145032	0.415497	0.0297485	0.827474	0.144762	-0.630654	0.957913	-0.0326919	0.0251792	-1.20165	0.990285	0.613133	0.894278	1.00558	0.77477	0.0962126	-0.512374	0.153979	0.0369818	-1.68133	0.180115	Cdk4	Interaction_One sex_Male only2
874	ONLI_0104	gctof	beta-alanine	0.897059	1	0.726467	0.815898	37	6	0.0105095	0.0970478	0.0153179	0.167382	0.14897	0.827474	0.0130136	-1.04958	0.168388	-0.847215	0.0219096	-1.29796	0.521014	0.576221	0.757282	0.790331	0.720805	0.0683634	0.567415	0.115254	0.860584	0.116672	0.914332	Cdk4	One sex_Male only
942	ONLI_0115	gctof	6-deoxyglucitol	0.654653	1	0.881334	0.989215	39	6	0.0172776	0.281488	0.0130939	0.206546	0.367098	0.827474	0.0206736	0.980536	0.700403	0.225956	0.00416871	1.73249	0.879965	0.234937	1.23685	1.07502	1.39023	0.73294	0.102418	0.806541	0.0248952	1.60895	0.163686	Cdk4	One sex_Male only
1005	ONLI_0121	gctof	3,6-anhydro-D-galactose	7.32676e-09	1	0.999546	0.997396	38	6	1.59353e-06	0.041113	0.811265	0.0012573	0.0696098	0.961743	3.12861e-06	1.80097	0.00109008	1.73878	0.000685643	1.88787	0.367424	0.0727536	2.688	2.88785	2.48116	0.07045	-0.469156	0.118266	0.367856	-0.320066	0.563856	Cdk4	Genotype effect with no sex effect(real)
1112	ONLI_0158	CSHPOS	AC 14:1	0.0040246	1	0.691967	0.795366	39	6	0.0360825	0.179374	0.331232	0.276247	0.251826	0.863973	0.0416389	-0.86935	0.0973842	-1.24676	0.229442	-0.479935	0.426045	0.980671	0.613661	0.497401	0.782303	0.129631	-0.468154	0.198599	0.702172	0.298672	0.831853	Cdk4	Genotype effect with no sex effect(real)
1122	ONLI_0159	CSHPOS	TAG 54:7; TAG 18:2-18:2-18:3;	0.000856617	1	0.775388	0.656179	39	6	0.0425766	0.0107089	0.465574	0.285368	0.0197877	0.863973	0.0710288	0.774416	0.0419864	1.05928	0.415775	0.509795	0.426045	0.980671	1.55176	2.15765	1.26947	0.0102439	0.789519	0.0205138	0.716809	0.240034	0.835782	Cdk4	Genotype effect with no sex effect(real)
1161	ONLI_0163	CSHPOS	9-HODE cholesteryl ester	0.0726554	1	0.984196	0.854773	27	4	0.037339	0.165795	0.0959111	0.276247	0.235273	0.863973	0.0458602	1.03191	0.381356	0.784621	0.0549897	1.18901	0.711706	0.788038	1.20973	1.12438	1.27668	0.204491	-0.48705	0.297681	0.869012	-0.08266	0.919476	Cdk4	Genotype effect with no sex effect(real)
1211	ONLI_0169	CSHPOS	TAG 53:5; TAG 17:1-18:2-18:2;	0.00987362	1	0.942928	0.9994	40	6	0.041437	3.97881e-06	0.242064	0.281843	1.39524e-05	0.863973	0.112592	0.682628	0.0181982	1.0626	0.575589	0.302652	0.426045	0.980671	1.30447	1.66377	1.12157	1.40181e-05	1.24546	5.16836e-05	0.339185	0.485505	0.53955	Cdk4	Genotype effect with no sex effect(real)
1252	ONLI_0173	CSHPOS	TAG 53:1; TAG 17:0-18:0-18:1;	0.000485187	1	0.233743	0.89468	34	6	0.0178897	0.00183417	0.712337	0.210672	0.00391125	0.936723	0.0596122	0.812583	0.126059	0.734579	0.0983518	0.995048	0.478078	0.963653	1.60747	1.50678	1.74974	0.00667258	0.887917	0.0140391	0.00419595	1.14839	0.111159	Cdk4	Genotype effect with no sex effect(real)
1272	ONLI_0176	CSHPOS	TAG 47:0; TAG 15:0-16:0-16:0;	0.0049708	1	0.227066	0.870081	39	6	0.00631169	0.000993199	0.626613	0.148696	0.00222623	0.895648	0.0213028	0.976113	0.0885542	0.818632	0.0514712	1.15559	0.426045	0.780977	1.40604	1.30702	1.48345	0.00320635	0.857792	0.00726956	0.0617077	1.19475	0.211684	Cdk4	Genotype effect with no sex effect(real)
1381	ONLI_0187	CSHPOS	TAG 60:2; TAG 18:1-20:1-22:0;	2.64778e-05	1	0.262265	0.580653	35	6	0.00117358	0.00443017	0.602437	0.0544678	0.00882677	0.886318	0.00537768	1.16729	0.0552662	1.00141	0.0172858	1.35532	0.426045	0.524557	1.89106	1.65017	2.0424	0.0100335	0.775178	0.020195	0.0450162	1.12909	0.190427	Cdk4	Genotype effect with no sex effect(real)
1422	ONLI_0191	CSHPOS	TAG 54:1; TAG 18:0-18:0-18:1;	4.1394e-07	1	0.913871	0.999979	38	6	0.00403579	4.80332e-09	0.85639	0.11155	3.10641e-08	0.964567	0.0652492	0.791236	0.0680837	0.743765	0.045069	0.838706	0.426045	0.756539	1.83653	1.62203	1.88995	4.57923e-08	1.41168	3.14175e-07	0.0327074	1.50662	0.180115	Cdk4	Genotype effect with no sex effect(real)
143	ONLI_0192	CSHPOS	TAG 51:3; TAG 15:0-18:1-18:2;	0.00370202	1	0.922046	0.966751	40	6	0.0488272	6.13581e-06	0.644572	0.285368	2.0867e-05	0.909879	0.127911	0.655729	0.0932607	0.805873	0.32621	0.505585	0.426045	0.980671	1.36334	1.573	1.26914	3.04454e-05	1.20075	0.000106762	0.0816435	0.900462	0.243045	Cdk4	Genotype effect with no sex effect(real)
1551	ONLI_0205	CSHPOS	TAG 56:3; TAG 18:1-18:1-20:1;	2.44405e-05	1	0.722837	0.97425	38	6	0.0390715	8.489e-11	0.359811	0.276247	7.9736e-10	0.863973	0.20768	0.546653	0.0418453	0.782282	0.444714	0.311023	0.426045	0.980671	1.33166	1.75137	1.23657	6.16419e-09	1.55588	5.59028e-08	0.0173435	1.08462	0.145519	Cdk4	Genotype effect with no sex effect(real)
1562	ONLI_0206	CSHPOS	TAG 52:5; TAG 16:0-18:2-18:3;	0.00735362	1	0.984968	0.924491	39	6	0.0172314	0.000587581	0.408281	0.206546	0.00140061	0.863973	0.0434772	0.862027	0.0232418	1.16704	0.313578	0.581785	0.426045	0.980671	1.5464	2.08157	1.30003	0.00115908	0.965996	0.00292178	0.54073	0.380742	0.721521	Cdk4	Genotype effect with no sex effect(real)
1591	ONLI_0209	CSHPOS	TAG 51:1; TAG 16:0-17:0-18:1;	0.00067434	1	0.97915	0.990017	38	6	0.0197627	0.000284262	0.684694	0.219617	0.000709756	0.934126	0.06154	0.801954	0.0489304	0.968904	0.223794	0.689456	0.426045	0.980671	1.55266	1.85457	1.44943	0.000628349	1.03461	0.00170367	0.125564	0.755159	0.298567	Cdk4	Genotype effect with no sex effect(real)
1622	ONLI_0212	CSHPOS	TAG 56:2; TAG 16:0-18:1-22:1;	1.46782e-05	1	0.932211	0.725131	37	6	0.0140195	2.98801e-11	0.495795	0.184357	3.53902e-10	0.869187	0.157744	0.612401	0.0334235	0.802376	0.238928	0.464613	0.426045	0.980671	1.51208	1.82141	1.47315	3.6053e-09	1.5609	3.6469e-08	0.0197181	1.22314	0.146216	Cdk4	Genotype effect with no sex effect(real)
1642	ONLI_0214	CSHPOS	PE 40:7e; PE 18:1e/22:6;	0.0516179	1	0.953708	0.997736	39	6	0.0379138	0.00668693	0.0153157	0.276247	0.0128683	0.827474	0.53651	0.269647	0.248142	-0.703836	0.0289647	1.23553	0.608718	0.613133	1.05745	0.908754	1.20116	0.31121	0.296507	0.419018	0.042086	2.23587	0.187131	Cdk4	One sex_Male only
1652	ONLI_0215	CSHPOS	SMd40:1	8.79713e-05	1	0.196924	0.191618	39	6	0.0391399	5.44308e-12	0.934947	0.276247	1.13015e-10	0.986354	0.263939	0.484876	0.183496	0.485406	0.15539	0.524429	0.533108	0.980671	1.16228	1.06552	1.21838	2.18896e-10	1.56322	8.84961e-09	0.033798	1.60224	0.180115	Cdk4	Genotype effect with no sex effect(real)
1681	ONLI_0220	CSHPOS	PC 36:4; PC 18:2-18:2;	0.0143707	1	0.570196	0.974844	40	6	0.0439389	6.08584e-07	0.567666	0.285368	2.48794e-06	0.886318	0.138597	0.638367	0.0667927	0.815156	0.35678	0.461578	0.426045	0.980671	1.29534	1.54241	1.17251	3.05881e-06	1.29954	1.32605e-05	0.123512	0.945965	0.295307	Cdk4	Genotype effect with no sex effect(real)
1692	ONLI_0221	CSHPOS	DAG 34:2; DAG 16:1-18:1;	0.0350011	1	1	0.999987	38	6	0.0108073	1.23311e-07	0.410084	0.167382	5.82587e-07	0.863973	0.078858	0.755637	0.0221187	1.03593	0.247033	0.546308	0.426045	0.980671	1.27189	1.49668	1.15633	8.52708e-07	1.34832	4.22911e-06	0.24312	0.858702	0.437949	Cdk4	Genotype effect with no sex effect(real)
1725	ONLI_0224	CSHPOS	PC16:0/9:0COOH	1.37292e-09	1	0.878928	0.760809	39	6	0.000190235	0.211584	0.951032	0.0166772	0.288823	0.986354	0.000286533	1.47057	0.00870719	1.49655	0.0143411	1.4526	0.426045	0.471465	3.74639	2.59264	4.67473	0.264762	0.312451	0.365888	0.698786	0.268509	0.830273	Cdk4	Genotype effect with no sex effect(real)
1741	ONLI_0226	CSHPOS	TAG 50:5; TAG 14:0-18:2-18:3;	0.0192703	1	0.96244	0.999672	38	6	0.0251375	1.60221e-07	0.379775	0.241872	7.43612e-07	0.863973	0.106805	0.695467	0.0318086	0.959358	0.369495	0.431576	0.426045	0.980671	1.36792	1.75055	1.19976	1.62748e-06	1.35095	7.59811e-06	0.157495	0.82317	0.347104	Cdk4	Genotype effect with no sex effect(real)
1771	ONLI_0229	CSHPOS	PCo-38:4 A	0.716818	1	0.589227	0.495949	38	6	0.0227844	0.0402077	0.034435	0.236092	0.0683704	0.863973	0.0901742	0.729546	0.0157104	1.54236	0.833477	-0.115746	0.426045	0.984011	1.08704	1.18556	0.991292	0.0511014	0.617092	0.0886132	0.0954866	-1.04101	0.265278	Cdk4	One sex_Female only
183	ONLI_0235	CSHPOS	TAG 56:4; TAG 18:1-18:2-20:1;	0.000139374	1	0.711638	0.99999	39	6	0.0281917	1.9891e-08	0.257386	0.258643	1.09748e-07	0.863973	0.137716	0.640673	0.0169732	0.987103	0.485855	0.330855	0.426045	0.980671	1.34612	1.8841	1.20455	2.8471e-07	1.42786	1.59277e-06	0.0660971	0.771609	0.21745	Cdk4	Genotype effect with no sex effect(real)
1863	ONLI_0238	CSHPOS	TAG 46:3; TAG 12:0-16:1-18:2;	0.00058154	1	0.959945	0.996125	30	6	0.0469374	0.00148134	0.873729	0.285368	0.00322929	0.971976	0.180682	0.58944	0.212284	0.667913	0.165914	0.781182	0.567595	0.980671	1.44005	1.81101	1.48597	0.00186947	1.01331	0.00451074	0.307642	1.12657	0.513171	Cdk4	Genotype effect with no sex effect(real)
1871	ONLI_0239	CSHPOS	TAG 58:1; TAG 18:0-18:1-22:0;	5.76558e-06	1	0.395672	0.839833	35	6	0.0400413	0.000679982	0.653267	0.276376	0.00159201	0.910938	0.105649	0.701053	0.253688	0.5827	0.115828	0.899074	0.609818	0.980671	1.5611	1.3244	1.73663	0.00332546	0.929471	0.00749653	0.0511743	1.24584	0.196003	Cdk4	Genotype effect with no sex effect(real)
2001	ONLI_0254	CSHPOS	TAG 50:4; TAG 14:0-18:2-18:2;	0.000668776	1	0.839904	0.998415	39	6	0.0475168	5.73841e-07	0.311883	0.285368	2.35915e-06	0.863973	0.150829	0.620572	0.0332397	0.953405	0.525187	0.321572	0.426045	0.980671	1.34138	1.82154	1.17831	3.89118e-06	1.31952	1.62358e-05	0.194124	0.68769	0.386778	Cdk4	Genotype effect with no sex effect(real)
2023	ONLI_0256	CSHPOS	TAG 58:4; TAG 18:1-18:2-22:1;	0.00384841	1	0.766536	0.963109	37	6	0.0215872	1.94498e-10	0.51428	0.233319	1.61536e-09	0.875195	0.143469	0.633642	0.0471939	0.781581	0.275575	0.444617	0.426045	0.980671	1.4797	1.97675	1.32016	1.22113e-08	1.52016	9.732e-08	0.0465886	1.1832	0.190427	Cdk4	Genotype effect with no sex effect(real)
2041	ONLI_0258	CSHPOS	SMd41:2 A	0.121289	1	0.882755	0.993603	40	6	0.0395639	3.76046e-06	0.22015	0.276247	1.33649e-05	0.863973	0.115764	0.67684	0.557444	0.286085	0.0289858	1.06759	0.82248	0.613133	1.14364	1.03972	1.22605	8.14727e-05	1.0804	0.000262375	0.0141355	1.86191	0.141176	Cdk4	Genotype effect with no sex effect(real)
2061	ONLI_0260	CSHPOS	TAG 60:3; TAG 18:2-20:1-22:0;	5.87244e-06	1	0.394743	0.945522	34	6	0.0241572	0.004504	0.877916	0.236092	0.00895127	0.971976	0.0752648	0.769313	0.0645423	0.903804	0.195574	0.792086	0.426045	0.980671	1.50574	1.61394	1.61837	0.00848672	0.891161	0.0173472	0.0173676	0.779443	0.145519	Cdk4	Genotype effect with no sex effect(real)
2072	ONLI_0261	CSHPOS	TAG 58:6; TAG 18:1-20:1-20:4;	0.0023605	1	0.405821	0.931186	38	6	0.0462102	3.05265e-05	0.551566	0.285368	9.12327e-05	0.883732	0.114754	0.680602	0.0556026	0.878914	0.388354	0.48229	0.426045	0.980671	1.2753	1.53561	1.14275	0.000109453	1.16059	0.000341337	0.0999641	0.763967	0.271037	Cdk4	Genotype effect with no sex effect(real)
2081	ONLI_0262	CSHPOS	TAG 55:3; TAG 15:0-19:0-21:3;	0.00672226	1	0.582253	0.999991	40	6	0.0444137	1.41109e-07	0.53884	0.285368	6.62706e-07	0.883732	0.152132	0.617753	0.0603226	0.802109	0.375766	0.433398	0.426045	0.980671	1.33482	1.57863	1.23409	1.36782e-06	1.35246	6.46234e-06	0.0105487	0.983746	0.134234	Cdk4	Genotype effect with no sex effect(real)
2131	ONLI_0267	CSHPOS	TAG 48:0; TAG 14:0-16:0-18:0;	0.0108395	1	0.961441	0.976822	38	6	0.0358319	0.296661	0.103206	0.276247	0.383086	0.863973	0.0414992	0.870985	0.189206	0.601864	0.111125	1.15267	0.544831	0.980671	1.44629	1.42888	1.47299	0.451522	0.238788	0.559264	0.270374	0.789597	0.468071	Cdk4	Genotype effect with no sex effect(real)
2142	ONLI_0268	CSHPOS	TAG 58:2; TAG 18:0-18:2-22:0;	0.000163227	1	0.531506	0.948912	36	6	0.00302063	0.000621313	0.773697	0.0993031	0.001471	0.949373	0.0135556	1.045	0.0635943	0.94898	0.0375588	1.14102	0.426045	0.699244	2.03626	1.84919	2.1202	0.00215307	0.926722	0.00507095	0.00460133	1.11876	0.111159	Cdk4	Genotype effect with no sex effect(real)
2153	ONLI_0269	CSHPOS	TAG 46:0; TAG 14:0-16:0-16:0;	0.288148	1	0.943975	0.812803	36	5	0.0341087	0.0474158	0.0352962	0.276247	0.0785261	0.863973	0.0400358	0.951149	0.304918	0.626587	0.10326	1.08549	0.653023	0.974426	1.37115	1.2094	1.42139	0.127143	0.492184	0.195547	0.127509	0.95109	0.301212	Cdk4	cannot classify
2161	ONLI_0270	CSHPOS	TAG 50:2; TAG 16:0-16:0-18:2;	9.90611e-05	1	0.829357	0.989494	40	6	0.0487924	4.2e-05	0.479604	0.285368	0.00012319	0.866306	0.112666	0.682491	0.0575653	0.921556	0.417832	0.443425	0.426045	0.980671	1.40492	1.85231	1.22534	0.000119358	1.13439	0.000365013	0.125633	0.656259	0.298567	Cdk4	Genotype effect with no sex effect(real)
2242	ONLI_0278	CSHPOS	TAG 58:5; TAG 18:1-18:2-22:2;	6.62938e-05	1	0.349443	0.968231	38	6	0.00935328	1.37706e-10	0.488782	0.159691	1.20722e-09	0.866628	0.125835	0.661128	0.0167337	0.879911	0.226549	0.522278	0.426045	0.980671	1.39023	2.22115	1.28718	1.05372e-08	1.51871	8.84449e-08	0.0257983	1.16108	0.165487	Cdk4	Genotype effect with no sex effect(real)
2261	ONLI_0281	CSHPOS	TAG 49:1; TAG 15:0-16:0-18:1;	1.96315e-05	1	0.976902	0.979151	38	6	0.0129258	2.42099e-06	0.495336	0.175835	8.9181e-06	0.869187	0.066879	0.786679	0.0267869	1.03495	0.2401	0.603236	0.426045	0.980671	1.46763	1.84475	1.36336	2.4107e-05	1.23179	8.64566e-05	0.0757352	0.800073	0.234521	Cdk4	Genotype effect with no sex effect(real)
2282	ONLI_0283	CSHPOS	SMd32:1	0.754521	1	0.42799	0.635098	40	6	0.0441549	0.000395934	0.550442	0.285368	0.000964172	0.883732	0.0894064	0.729236	0.361493	0.518043	0.0672967	0.94043	0.701536	0.81215	1.1328	1.08502	1.19009	0.000813145	-1.00268	0.00214572	0.236325	-0.58029	0.428851	Cdk4	Genotype effect with no sex effect(real)
2351	ONLI_0290	CSHPOS	SMd33:1	0.327166	1	0.920684	0.73754	38	5	0.00072603	8.01864e-07	0.0732437	0.0440644	3.17925e-06	0.863973	0.00883142	1.19131	0.145182	0.655635	0.000737679	1.74342	0.494985	0.0727536	1.23191	1.10814	1.40439	2.20925e-07	-1.36472	1.28169e-06	0.554965	-0.276935	0.733133	Cdk4	Genotype effect with no sex effect(real)
237	ONLI_0292	CSHPOS	TAG 52:3; TAG 16:1-18:1-18:1;	0.00469811	1	0.893046	0.871676	39	6	0.0364817	7.64807e-05	0.323882	0.276247	0.000210255	0.863973	0.0907998	0.727158	0.0292166	1.08018	0.469395	0.402497	0.426045	0.980671	1.41448	1.73745	1.26159	0.000224793	1.10612	0.000656894	0.333877	0.428435	0.533266	Cdk4	Genotype effect with no sex effect(real)
2431	ONLI_0299	CSHPOS	TAG 51:4; TAG 16:0-17:2-18:2;	0.00677021	1	0.784281	0.939775	40	6	0.0154105	4.27604e-07	0.481052	0.192998	1.8848e-06	0.866306	0.0705549	0.774676	0.0223963	0.992256	0.281021	0.557095	0.426045	0.980671	1.44575	1.69938	1.32982	4.87043e-06	1.27624	2.00144e-05	0.0945012	0.841084	0.264402	Cdk4	Genotype effect with no sex effect(real)
2441	ONLI_0300	CSHPOS	PC37:2	0.000559164	1	0.182824	0.182824	40	6	0.023813	5.66042e-13	0.413617	0.236092	1.09511e-10	0.863973	0.203001	0.550519	0.0366724	0.743451	0.334814	0.357586	0.426045	0.980671	1.2068	1.37452	1.14774	1.37219e-10	1.6162	8.29245e-09	0.00214563	1.23034	0.111159	Cdk4	Genotype effect with no sex effect(real)
2491	ONLI_0306	CSHPOS	PC35:2 A	0.00427772	1	0.970989	0.998857	40	6	0.00432977	1.41703e-10	0.200954	0.113873	1.22861e-09	0.863973	0.0686912	0.77967	0.00396763	1.11085	0.290011	0.448487	0.426045	0.980671	1.27048	1.42582	1.17747	4.83241e-09	1.52156	4.61818e-08	0.0163258	0.859198	0.145519	Cdk4	Genotype effect with no sex effect(real)
264	ONLI_0322	CSHPOS	TAG 54:4; TAG 16:1-18:0-20:3;	0.033325	1	0.603312	0.703452	39	6	0.0448669	0.00188117	0.686683	0.285368	0.00398991	0.934126	0.0859905	0.737849	0.0765941	0.896429	0.319576	0.602239	0.426045	0.980671	1.36177	1.57438	1.24106	0.00363459	0.895784	0.00806002	0.226594	0.601595	0.418695	Cdk4	Genotype effect with no sex effect(real)
2664	ONLI_0324	CSHPOS	PE 36:5e; PE 16:0e/20:5;	0.0746435	1	0.413347	0.584995	39	6	0.365972	0.00072036	0.0493925	0.642025	0.00167166	0.863973	0.45582	-0.325001	0.0158559	-1.0478	0.556322	0.379088	0.426045	0.980671	0.952007	0.826708	1.058	0.0102271	0.729923	0.0205138	0.0439766	2.15682	0.190427	Cdk4	Interaction_One sex_Female only2
2703	ONLI_0328	CSHPOS	TAG 54:5; TAG 18:0-18:2-18:3;	0.341818	1	0.958539	0.887757	39	6	0.0523671	0.0439032	0.0427545	0.296089	0.0737013	0.863973	0.059351	0.807466	0.0983042	0.881725	0.27275	0.718169	0.426045	0.980671	1.38255	1.47961	1.30037	0.0578761	0.58646	0.0990548	0.574589	0.422904	0.74934	Cdk4	Interaction_cannot classify2
272	ONLI_0330	CSHPOS	PC37:3	0.109614	1	0.899059	0.833358	40	6	0.0297123	2.28387e-10	0.997484	0.267152	1.85771e-09	0.99875	0.17858	0.581067	0.14738	0.580246	0.145845	0.581888	0.495839	0.980671	1.20664	1.21253	1.20318	9.88121e-09	1.48007	8.46627e-08	0.0103444	1.48171	0.134234	Cdk4	Genotype effect with no sex effect(real)
2741	ONLI_0332	CSHPOS	PC35:4	0.00821443	1	0.900031	0.235238	39	6	0.00238152	2.59133e-12	0.760161	0.0854101	1.09511e-10	0.943516	0.0839597	0.742504	0.0260681	0.834939	0.066993	0.689649	0.426045	0.81215	1.20669	1.30656	1.15936	6.80868e-10	1.5436	1.16869e-08	0.0108522	1.39831	0.134234	Cdk4	Genotype effect with no sex effect(real)
2751	ONLI_0333	CSHPOS	TAG 56:1; TAG 16:0-18:1-22:0;	7.16663e-06	1	0.832072	0.941876	35	6	0.00408119	1.9308e-05	0.772842	0.11155	6.04524e-05	0.949373	0.0319511	0.917638	0.0830848	0.844734	0.0381084	1.0231	0.426045	0.699244	2.032	1.71646	2.18186	0.000114924	1.13961	0.000354201	0.00830968	1.31798	0.128303	Cdk4	Genotype effect with no sex effect(real)
2792	ONLI_0337	CSHPOS	DAG 36:5; DAG 18:2-18:3;	0.214436	1	0.997092	0.896389	40	6	0.0275272	0.000537776	0.24304	0.258559	0.00128577	0.863973	0.0583803	0.809435	0.023427	1.22385	0.47374	0.395024	0.426045	0.980671	1.37925	1.72113	1.16878	0.000619683	0.999166	0.00168596	0.807162	0.170343	0.888216	Cdk4	Genotype effect with no sex effect(real)
2822	ONLI_0340	CSHPOS	TAG 54:6; TAG 18:1-18:2-18:3;	0.000583797	1	0.91052	0.752537	38	6	0.0242376	0.00508942	0.491293	0.236092	0.0100389	0.869125	0.0491262	0.842064	0.0228356	1.11856	0.338437	0.608609	0.426045	0.980671	1.57841	2.27275	1.29166	0.00814121	0.817723	0.0167276	0.626197	0.307775	0.784237	Cdk4	Genotype effect with no sex effect(real)
2921	ONLI_0350	CSHPOS	TAG 53:4; TAG 17:1-18:1-18:2;	0.00836205	1	0.912473	0.985147	39	6	0.0320309	3.96969e-06	0.348159	0.276247	1.39524e-05	0.863973	0.103653	0.70059	0.0222493	1.02	0.446088	0.41283	0.426045	0.980671	1.36443	1.70211	1.22054	2.31551e-05	1.23444	8.34217e-05	0.161661	0.627267	0.351449	Cdk4	Genotype effect with no sex effect(real)
2981	ONLI_0356	CSHPOS	TAG 52:1; TAG 16:0-18:0-18:1;	4.99569e-05	1	0.891568	0.926634	38	6	0.0133222	0.00139402	0.622695	0.178156	0.00307229	0.893285	0.0351244	0.898702	0.0336455	1.09846	0.207395	0.745521	0.426045	0.980671	1.68089	2.12745	1.51132	0.00392302	0.884866	0.00864598	0.288299	0.531932	0.489843	Cdk4	Genotype effect with no sex effect(real)
3001	ONLI_0359	CSHPOS	CE (20:2)	0.00777821	1	0.998385	0.998971	33	6	0.00742987	5.60267e-05	0.788939	0.158437	0.000160163	0.956332	0.0299627	0.930654	0.0644985	1.0015	0.0909293	0.826987	0.426045	0.914022	1.62417	1.75664	1.53257	0.000342616	1.08308	0.000962008	0.231727	0.908565	0.424205	Cdk4	Genotype effect with no sex effect(real)
3022	ONLI_0361	CSHPOS	TAG 58:3; TAG 18:1-18:2-22:0;	2.87089e-05	1	0.689514	0.999994	39	6	0.0303834	7.49735e-07	0.876422	0.267152	3.00275e-06	0.971976	0.121908	0.666895	0.0988165	0.730991	0.203614	0.635427	0.426045	0.980671	1.60264	1.81057	1.56233	6.52419e-06	1.27249	2.59979e-05	0.0382059	1.17692	0.180703	Cdk4	Genotype effect with no sex effect(real)
3072	ONLI_0366	CSHPOS	SMd34:1	0.689983	1	0.994078	0.746673	39	6	0.00946142	1.0296e-05	0.883921	0.159691	3.37076e-05	0.971976	0.0490355	0.841321	0.0914611	0.902325	0.0710245	0.809579	0.426045	0.81215	1.12512	1.11385	1.1441	5.17257e-05	-1.14117	0.000174409	0.0499998	-1.23392	0.192438	Cdk4	Genotype effect with no sex effect(real)
3083	ONLI_0367	CSHPOS	PC33:2	0.00621253	1	0.794567	0.767819	38	6	0.0205131	1.58057e-11	0.309746	0.22479	2.2674e-10	0.863973	0.200958	0.554675	0.02045	0.848037	0.385303	0.345227	0.426045	0.980671	1.21957	1.37728	1.16547	1.71614e-09	1.59438	2.15674e-08	0.00493103	1.09157	0.111159	Cdk4	Genotype effect with no sex effect(real)
3101	ONLI_0369	CSHPOS	TAG 51:2; TAG 16:0-17:0-18:2;	1.16834e-05	1	0.657947	0.716369	38	6	0.0394935	4.71159e-07	0.334998	0.276247	2.02035e-06	0.863973	0.149715	0.623171	0.0342418	0.956544	0.468032	0.359988	0.426045	0.980671	1.3168	1.94255	1.16555	4.98526e-06	1.33362	2.03801e-05	0.0581985	0.737065	0.206841	Cdk4	Genotype effect with no sex effect(real)
3131	ONLI_0373	CSHPOS	PC 36:2	0.184217	1	0.50634	0.91971	40	6	0.0477051	4.17101e-06	0.482192	0.285368	1.44339e-05	0.866306	0.129181	0.653609	0.0382139	0.880069	0.439713	0.427148	0.426045	0.980671	1.15043	1.24159	1.08053	1.99974e-05	1.23709	7.27094e-05	0.0187407	0.784165	0.145519	Cdk4	Genotype effect with no sex effect(real)
3142	ONLI_0374	CSHPOS	LPC 18:2	0.797158	1	0.978797	0.999837	40	6	0.0348129	0.600865	0.179546	0.276247	0.689073	0.863973	0.0401174	0.8746	0.0821456	1.02552	0.261974	0.723675	0.426045	0.980671	1.16088	1.18874	1.13281	0.729108	-0.10998	0.804568	0.39297	-0.41183	0.593823	Cdk4	Genotype effect with no sex effect(real)
323	ONLI_0384	CSHPOS	TAG 55:3; TAG 18:1-18:2-19:0;	9.74647e-05	1	0.910374	0.999061	39	6	0.0402829	5.17355e-08	0.338914	0.276376	2.61662e-07	0.863973	0.158026	0.610082	0.0288726	0.91202	0.482472	0.343818	0.426045	0.980671	1.36185	1.73881	1.24855	7.20457e-07	1.39126	3.64385e-06	0.0830578	0.823058	0.244237	Cdk4	Genotype effect with no sex effect(real)
3242	ONLI_0385	CSHPOS	LPC 20:0	5.2518e-06	1	0.196924	0.191618	39	6	0.0196447	8.03703e-13	0.546702	0.219617	1.09511e-10	0.883732	0.206343	0.547367	0.0454602	0.709868	0.252449	0.426062	0.426045	0.980671	1.13573	1.23159	1.13774	2.37869e-10	1.60666	8.93708e-09	0.00484412	1.32285	0.111159	Cdk4	Genotype effect with no sex effect(real)
3251	ONLI_0386	CSHPOS	TAG 52:4; TAG 16:0-18:2-18:2;	0.200739	1	0.982778	0.980722	40	6	0.0483602	0.00154834	0.534222	0.285368	0.00335615	0.883732	0.0864334	0.735869	0.06743	0.962193	0.384721	0.509546	0.426045	0.980671	1.33439	1.51051	1.21602	0.00241229	0.91695	0.00563106	0.399251	0.464303	0.596608	Cdk4	Genotype effect with no sex effect(real)
3261	ONLI_0387	CSHPOS	TAG 53:2; TAG 17:0-18:1-18:1;	3.01679e-05	1	0.896714	0.781642	38	6	0.023105	1.32177e-06	0.352505	0.236092	5.08719e-06	0.863973	0.100859	0.707149	0.0266506	1.03312	0.371818	0.448825	0.426045	0.980671	1.36698	1.84383	1.22727	1.13517e-05	1.28533	4.3224e-05	0.0814768	0.701029	0.243045	Cdk4	Genotype effect with no sex effect(real)
3441	ONLI_0405	CSHPOS	TAG 49:2; TAG 15:0-16:0-18:2;	7.65931e-05	1	0.384569	0.815936	39	6	0.0151043	4.09982e-06	0.588173	0.192215	1.42985e-05	0.886318	0.0635245	0.795104	0.0320906	0.984611	0.232984	0.636056	0.426045	0.980671	1.53227	1.78329	1.44974	4.24414e-05	1.18791	0.000144962	0.0496342	0.839355	0.192438	Cdk4	Genotype effect with no sex effect(real)
3541	ONLI_0415	CSHPOS	TAG 51:5; TAG 15:0-18:2-18:3;	0.0178689	1	0.988467	0.999987	39	6	0.0379387	0.000706559	0.604438	0.276247	0.00164447	0.886318	0.0823032	0.746367	0.0685607	0.943303	0.316108	0.574386	0.426045	0.980671	1.40186	1.60985	1.30685	0.00103647	0.973266	0.00263798	0.41446	0.604349	0.607823	Cdk4	Genotype effect with no sex effect(real)
3592	ONLI_0420	CSHPOS	Lyso-PC o-18	0.542131	1	0.950924	0.935712	40	5	0.00837998	0.0688104	0.281979	0.159691	0.109902	0.863973	0.0172083	1.09	0.0260218	1.50898	0.298168	0.606686	0.426045	0.980671	1.1322	1.19313	1.0694	0.052266	0.580592	0.0902361	0.659807	-0.321703	0.807137	Cdk4	Genotype effect with no sex effect(real)
3603	ONLI_0421	CSHPOS	CE ( 24:1)	1.12566e-05	1	0.99978	0.999887	20	6	0.0448039	0.214762	0.130252	0.285368	0.291146	0.863973	0.0563829	-0.854834	0.161658	-0.92432	0.24398	-0.746725	0.510192	0.980671	0.20526	0.323372	0.158763	0.362553	0.386236	0.472817	0.51209	0.563832	0.69542	Cdk4	Genotype effect with no sex effect(real)
362	ONLI_0423	CSHPOS	TAG 56:5; TAG 18:1-18:2-20:2;	0.000980367	1	0.976886	0.999652	39	6	0.00984324	3.65538e-07	0.339775	0.161798	1.63869e-06	0.863973	0.0605405	0.803873	0.0110727	1.11113	0.293909	0.530134	0.426045	0.980671	1.4505	1.95298	1.27345	2.91254e-06	1.30728	1.28379e-05	0.171159	0.726279	0.360118	Cdk4	Genotype effect with no sex effect(real)
3652	ONLI_0426	CSHPOS	DAG 38:6; DAG 18:2-20:4;	0.120759	1	0.977852	1	38	6	0.0334706	3.41763e-07	0.0232648	0.276247	1.54086e-06	0.863973	0.384035	0.379557	0.0105675	1.12021	0.564573	-0.284778	0.426045	0.980671	1.10063	1.37515	0.93686	7.81352e-07	1.45009	3.92667e-06	0.872369	0.0450967	0.921418	Cdk4	One sex_Female only
3761	ONLI_0438	CSHPOS	TAG 56:5; TAG 18:0-18:1-20:4;	0.000876254	1	0.796477	0.943046	39	6	0.0393266	0.16957	0.0873777	0.276247	0.239769	0.863973	0.0451929	0.855417	0.0448867	1.02824	0.311766	0.693938	0.426045	0.980671	1.3232	1.47925	1.20675	0.168448	0.4425	0.252672	0.774461	0.108195	0.866523	Cdk4	Genotype effect with no sex effect(real)
3861	ONLI_0449	CSHPOS	SMd39:1	0.00031159	1	0.182824	0.182824	40	6	0.000994349	3.19235e-12	0.0631091	0.0518987	1.09511e-10	0.863973	0.0693097	0.778001	0.315159	0.372058	0.00021787	1.18394	0.661032	0.0572997	1.2749	1.05567	1.36671	1.3982e-10	1.45997	8.29245e-09	0.000646046	2.27186	0.111159	Cdk4	Genotype effect with no sex effect(real)
3964	ONLI_0471	CSHNEG	FA 11:0	0.863626	1	0.965156	0.998383	39	6	0.000108789	0.968359	0.116296	0.0107293	0.978278	0.863973	0.00016869	-1.51672	0.00203909	-2.0759	0.0428583	-0.961091	0.367424	0.75145	0.607415	0.482691	0.737891	0.616334	-0.139021	0.714078	0.112246	0.975791	0.281148	Cdk4	Genotype effect with no sex effect(real)
3974	ONLI_0473	CSHNEG	FA 13:0	0.00407475	1	0.98822	0.920233	37	6	0.000590083	0.688149	0.580482	0.038798	0.755873	0.886318	0.000851933	1.36859	0.0284242	1.57244	0.0104928	1.1635	0.426045	0.41394	1.38132	1.51537	1.24426	0.877767	-0.0461133	0.918512	0.429735	-0.455047	0.620991	Cdk4	Genotype effect with no sex effect(real)
4292	ONLI_0518	CSHNEG	LPI 18:2	0.144512	1	0.998283	0.997027	39	6	0.0123491	0.431871	0.0738972	0.172117	0.529932	0.863973	0.0150255	1.02725	0.0806358	1.05315	0.107697	0.995907	0.426045	0.980671	1.36328	1.4301	1.2894	0.475063	-0.21264	0.582931	0.780343	-0.269879	0.866523	Cdk4	Genotype effect with no sex effect(real)
4592	ONLI_0563	CSHNEG	SM d33:1; SM d17:1/16:0;	0.415319	1	0.967727	1	40	5	0.0124343	8.06647e-08	0.732412	0.172117	3.92867e-07	0.943516	0.0422048	0.937878	0.103188	0.7188	0.0835484	0.935522	0.440084	0.884565	1.17889	1.12946	1.18858	6.75041e-07	-1.32389	3.48109e-06	0.0600716	-1.10717	0.208795	Cdk4	Genotype effect with no sex effect(real)
4671	ONLI_0571	CSHNEG	PE 38:6; PE 16:0-22:6;	0.00116729	1	0.196924	0.191618	39	6	0.912798	5.44308e-12	0.0481528	0.966979	1.13015e-10	0.863973	0.913463	-0.0475115	0.209789	0.45884	0.167305	-0.510412	0.567595	0.980671	0.905683	1.1355	0.832428	1.28694e-10	1.69457	8.29245e-09	0.00845594	0.725322	0.128303	Cdk4	Interaction_cannot classify2
471	ONLI_0575	CSHNEG	PE 40:8e; PE 18:2e/22:6;	0.0168991	1	0.910942	1	40	6	0.00951265	5.40921e-08	0.434829	0.159691	2.71675e-07	0.863973	0.0628809	-0.795965	0.0178213	-1.02622	0.240104	-0.565712	0.426045	0.980671	0.761411	0.715567	0.790331	3.72523e-06	1.22311	1.56341e-05	0.021468	1.68361	0.149896	Cdk4	Genotype effect with no sex effect(real)
4784	ONLI_0582	CSHNEG	HexCer-NS d36:1; HexCer-NS d18:1/18:0;	0.000101016	1	0.419374	0.39434	37	5	0.0537942	2.67436e-11	0.0158045	0.301019	3.28549e-10	0.827474	0.780803	0.132158	0.200676	-0.494423	0.0510824	0.818536	0.560744	0.780977	0.91871	0.684085	4.11386	2.50351e-10	-1.70532	8.97849e-09	0.0680463	-0.392357	0.220035	Cdk4	Interaction_cannot classify2
4873	ONLI_0593	CSHNEG	PC 34:2e; PC 16:0e/18:2;	0.000849043	1	0.254994	0.254994	40	6	0.338419	3.06364e-12	0.0497514	0.627071	1.09511e-10	0.863973	0.582033	0.239829	0.0454516	0.718886	0.523766	-0.239228	0.426045	0.980671	1.06573	1.26314	0.967349	4.70802e-11	1.68613	8.29245e-09	0.0828156	0.728016	0.244237	Cdk4	Interaction_One sex_Female only2
4911	ONLI_0598	CSHNEG	PI 32:0; PI 16:0-16:0;	0.685589	1	0.949051	0.998057	40	6	0.00845687	0.007475	0.821872	0.159691	0.0142803	0.961743	0.018475	0.996332	0.0403298	1.0783	0.130185	0.91436	0.426045	0.980671	1.39519	1.46319	1.34357	0.0114107	0.757361	0.022735	0.21357	0.593417	0.405064	Cdk4	Genotype effect with no sex effect(real)
5022	ONLI_0611	CSHNEG	SM d39:1; SM d16:1/23:0;	0.0003078	1	0.196924	0.191618	39	6	0.0039525	5.44308e-12	0.694026	0.11155	1.13015e-10	0.936723	0.120085	0.67008	0.0958714	0.600068	0.0290738	0.779721	0.426045	0.613133	1.19423	1.12277	1.24281	1.23004e-10	1.54555	8.29245e-09	0.0163053	1.72521	0.145519	Cdk4	Genotype effect with no sex effect(real)
5091	ONLI_0620	CSHNEG	PC 36:3 a	0.315534	1	0.999083	0.983173	39	6	0.0382799	5.74649e-09	0.601642	0.276247	3.62718e-08	0.886318	0.159562	0.607889	0.0846006	0.734231	0.297659	0.44448	0.426045	0.980671	1.10114	1.16439	1.04687	2.41508e-08	1.44558	1.78084e-07	0.166966	1.15583	0.353935	Cdk4	Genotype effect with no sex effect(real)
5111	ONLI_0622	CSHNEG	PC 36:3; PC 18:1-18:2;	0.315534	1	0.999083	0.983173	39	6	0.0382799	5.74649e-09	0.601642	0.276247	3.62718e-08	0.886318	0.159562	0.607889	0.0846006	0.734231	0.297659	0.44448	0.426045	0.980671	1.10114	1.16439	1.04687	2.41508e-08	1.44558	1.78084e-07	0.166966	1.15583	0.353935	Cdk4	Genotype effect with no sex effect(real)
5141	ONLI_0628	CSHNEG	PI 35:2; PI 17:0-18:2;	0.0389661	1	0.834144	0.991971	40	6	0.011746	4.74683e-09	0.87757	0.171622	3.09525e-08	0.971976	0.0974807	0.712048	0.0679671	0.754083	0.121676	0.670012	0.426045	0.980671	1.25087	1.40329	1.17303	3.18486e-08	1.41663	2.30537e-07	0.0783556	1.33256	0.236484	Cdk4	Genotype effect with no sex effect(real)
5211	ONLI_0638	CSHNEG	PI 36:4; PI 16:0-20:4;	0.0251488	1	0.536228	0.348562	37	6	0.0797559	2.69301e-11	0.0381254	0.335456	3.28549e-10	0.863973	0.646776	0.200844	0.042053	0.736666	0.451084	-0.289231	0.426045	0.980671	1.04314	1.30849	0.921984	3.49927e-10	1.69263	9.35714e-09	0.0732665	0.666735	0.231229	Cdk4	Interaction_One sex_Female only2
5291	ONLI_0649	CSHNEG	SM d42:5; SM d14:3/28:2;	0.0218102	1	0.394237	0.502776	28	6	0.0968413	1.635e-08	0.0315923	0.376393	9.28067e-08	0.863973	0.526687	-0.283353	0.276112	-0.462801	0.0304402	0.687142	0.631455	0.615828	0.724263	0.810879	2.1879	2.13021e-07	-1.84578	1.24499e-06	0.0482147	-0.695832	0.190427	Cdk4	Interaction_One sex_Male only2
5301	ONLI_0650	CSHNEG	PC 38:5; PC 16:0-22:5;	0.330876	1	0.988798	0.822608	36	6	0.733927	0.00183035	0.0389914	0.8808	0.00391125	0.863973	0.726903	-0.153459	0.175945	0.640874	0.154283	-0.886851	0.533108	0.980671	0.961092	1.14093	0.832329	0.000366887	1.09695	0.0010265	0.649834	-0.430778	0.803579	Cdk4	Interaction_cannot classify2
5603	ONLI_0703	HILICPOS	R-Butyrylcarnitine	0.11723	1	0.976131	0.967887	37	6	0.00735497	0.574565	0.0185049	0.158437	0.667647	0.827474	0.00927985	1.09556	0.41719	0.502239	0.00369148	1.69805	0.737604	0.224044	1.33889	1.11904	1.58808	0.271867	-0.339525	0.373443	0.211088	0.85629	0.404007	Cdk4	One sex_Male only
5612	ONLI_0704	HILICPOS	S-Cotinine N-oxide	2.87705e-06	1	0.873646	0.8252	31	6	0.00530344	0.329959	0.204558	0.134981	0.419223	0.863973	0.00708873	1.13777	0.00686115	1.62329	0.279817	0.663905	0.426045	0.980671	1.71337	1.80496	1.62673	0.677594	-0.120346	0.767229	0.394377	-1.07973	0.593823	Cdk4	Genotype effect with no sex effect(real)
5682	ONLI_0712	HILICPOS	7-Keto-3a,12-a-dihydroxycholanic acid	2.58229e-08	1	0.130255	0.861787	23	6	1.39679e-05	1.84474e-05	0.00132424	0.00346961	5.84538e-05	0.765306	0.00124562	1.34415	0.000190644	1.96045	0.472675	0.189871	0.150418	0.980671	3.75207	7.74505	1.36872	1.14497e-05	1.37484	4.3224e-05	0.572538	-0.395736	0.747902	Cdk4	One sex_Female only
5713	ONLI_0720	HILICPOS	Arg-Ser	0.491128	1	0.525942	0.947496	22	5	0.0367817	0.939767	0.212988	0.276247	0.95183	0.863973	0.046631	0.946873	0.116538	1.03939	0.230858	0.906642	0.466743	0.980671	1.16491	1.19446	1.14682	0.835452	-0.0884598	0.888372	0.751477	-0.221205	0.852398	Cdk4	Genotype effect with no sex effect(real)
5741	ONLI_0730	HILICPOS	Gluconolactone	0.952105	1	0.855432	0.658395	37	6	0.0368455	0.1189	0.0415376	0.276247	0.17535	0.863973	0.0427582	-0.867053	0.255057	-0.501132	0.0751961	-1.26261	0.609818	0.841482	0.846954	0.918971	0.764632	0.254205	-0.36545	0.354987	0.0724586	-1.12692	0.230523	Cdk4	cannot classify
5804	ONLI_0739	HILICPOS	Isovaleryl-L-carnitine	0.108524	1	0.954911	0.982191	39	6	0.000344925	0.0666976	0.269491	0.0247406	0.107616	0.863973	0.00080543	1.37334	0.0681438	0.976012	0.00335963	1.75487	0.426045	0.220896	1.33472	1.23049	1.44844	0.0299925	-0.61594	0.0550328	0.784497	0.162916	0.868118	Cdk4	Genotype effect with no sex effect(real)
5812	ONLI_0740	HILICPOS	Lauroyl-L-carnitine	0.0118866	1	0.91762	0.690953	38	6	0.0108194	0.573967	0.634943	0.167382	0.667647	0.904278	0.0133127	-1.04536	0.0914232	-1.22674	0.0590411	-0.85327	0.426045	0.788038	0.689433	0.627786	0.763752	0.519087	-0.203437	0.624031	0.776127	0.170028	0.866523	Cdk4	Genotype effect with no sex effect(real)
5853	ONLI_0746	HILICPOS	L-Homocitrulline	0.222194	1	0.992363	0.996706	39	6	0.985738	0.00990233	0.0418303	0.996657	0.0184267	0.863973	0.98614	-0.00759566	0.43969	0.473193	0.369915	-0.503471	0.748892	0.980671	1.00307	1.09515	0.895025	0.062766	-0.588401	0.1065	0.0282191	-1.56507	0.172596	Cdk4	Interaction_cannot classify2
5893	ONLI_0751	HILICPOS	N-.alpha.-Acetyl-L-arginine	0.169747	1	0.985671	0.967056	40	6	0.0112889	0.111534	0.0248191	0.168055	0.166038	0.863973	0.0137372	1.039	0.0621944	1.09483	0.104165	0.983166	0.426045	0.974426	1.25315	1.27717	1.23192	0.119205	0.463349	0.185509	0.653863	0.351684	0.803579	Cdk4	cannot classify
6053	ONLI_0774	HILICPOS	Stearoyl-L-carnitine	0.166388	1	0.831171	0.984899	37	6	0.00296817	0.0214192	0.00830566	0.0993031	0.0384085	0.827474	0.0354052	-0.898522	0.00699489	-1.89204	0.749719	0.137293	0.426045	0.984011	0.782936	0.557279	1.04751	0.0768101	-0.521696	0.127274	0.133488	1.50763	0.311971	Cdk4	One sex_Female only
6121	ONLI_0788	HILICPOS	1-Methyladenosine	0.0790663	1	0.652027	0.937153	38	6	0.0481506	0.00012832	0.173607	0.285368	0.00034089	0.863973	0.0902837	-0.729307	0.0494953	-1.16819	0.601386	-0.231186	0.426045	0.981851	0.862562	0.803768	0.952917	5.64143e-05	-1.12541	0.00018781	0.856389	-0.188405	0.914331	Cdk4	Genotype effect with no sex effect(real)
6183	ONLI_0798	HILICPOS	Ala-Ile	0.222703	1	0.999913	0.999747	35	6	0.0229563	0.000144448	0.262524	0.236092	0.000379898	0.863973	0.0524347	-0.834197	0.42678	-0.42037	0.0212448	-1.1684	0.741695	0.576221	0.651553	0.859885	0.356921	0.0017354	-0.928916	0.00421303	0.0356245	-1.67695	0.180115	Cdk4	Genotype effect with no sex effect(real)
6215	ONLI_0802	HILICPOS	Cytosine	0.00789011	1	0.926758	0.806934	39	6	1.75899e-05	0.0194657	0.63884	0.00346961	0.0353068	0.908189	7.67109e-05	1.58129	0.0172239	1.43284	0.000446751	1.7448	0.426045	0.0634592	1.87594	1.72855	2.08815	0.0308355	-0.586783	0.0564483	0.564481	-0.274824	0.739826	Cdk4	Genotype effect with no sex effect(real)
6281	ONLI_0812	HILICPOS	N-Methylleucine	1.18362e-06	1	0.903144	0.991906	39	6	0.0375307	0.648609	0.183896	0.276247	0.722814	0.863973	0.0432273	-0.863008	0.196092	-0.655675	0.130853	-1.07242	0.55256	0.980671	0.232276	0.250252	0.215378	0.801897	-0.0810591	0.865523	0.256369	-0.497803	0.452517	Cdk4	Genotype effect with no sex effect(real)
6352	ONLI_0820	HILICPOS	4-Aminobenzoic acid	0.154485	1	0.958809	0.946059	36	6	0.0157542	0.0441633	0.0187026	0.19422	0.0738239	0.827474	0.109238	0.692993	0.0198691	1.62475	0.63238	-0.238765	0.426045	0.981851	1.25017	1.5661	0.930183	0.939071	0.0236816	0.95975	0.054248	-1.83983	0.20002	Cdk4	One sex_Female only
6363	ONLI_0821	HILICPOS	4-Guanidinobutyric acid	0.00471664	1	0.967888	0.980986	37	6	0.00105244	0.658844	0.591808	0.0518987	0.730413	0.886318	0.00147283	1.31268	0.0124248	1.52053	0.0594723	1.11874	0.426045	0.788038	1.67941	1.78568	1.59228	0.553826	0.171609	0.653794	0.804025	-0.230178	0.886	Cdk4	Genotype effect with no sex effect(real)
6375	ONLI_0822	HILICPOS	5'-Methylthioadenosine	0.195037	1	0.824758	0.478295	37	6	3.30898e-06	0.194296	0.870163	0.00130539	0.268476	0.971976	6.33874e-06	1.75599	0.00805923	1.69149	4.0274e-05	1.7977	0.426045	0.0317762	1.69305	1.68606	1.68891	0.297213	0.280971	0.400857	0.329188	0.387179	0.532168	Cdk4	Genotype effect with no sex effect(real)
6391	ONLI_0824	HILICPOS	Acetylcarnitine	0.789876	1	0.579179	0.418699	40	6	0.00095189	0.0432266	0.497937	0.0518987	0.0727202	0.869187	0.00223172	1.26585	0.086519	1.02208	0.0057383	1.50963	0.426045	0.301835	1.17817	1.14192	1.21765	0.0264441	-0.628957	0.0489774	0.843728	-0.141404	0.905716	Cdk4	Genotype effect with no sex effect(real)
6491	ONLI_0841	HILICPOS	Carnitine	0.395698	1	0.817686	0.698153	40	6	8.04231e-05	0.625726	0.412792	0.0095444	0.708061	0.863973	0.000125444	1.54178	0.0479837	1.25002	0.000482579	1.83354	0.426045	0.0634592	1.29925	1.22863	1.3726	0.487407	-0.193726	0.5953	0.439042	0.389791	0.629376	Cdk4	Genotype effect with no sex effect(real)
6522	ONLI_0844	HILICPOS	Citrulline	0.108032	1	0.942816	0.98869	38	6	0.0457944	0.000916643	0.988943	0.285368	0.00207825	0.997733	0.0782519	0.757115	0.185554	0.72836	0.181303	0.738307	0.536271	0.980671	1.1172	1.08601	1.14326	0.00311447	-0.903693	0.00708161	0.161261	-0.893746	0.351449	Cdk4	Genotype effect with no sex effect(real)
6613	ONLI_0854	HILICPOS	Glutamic acid	0.389531	1	0.966318	0.989637	39	6	0.0902497	1.37252e-06	0.0332721	0.359631	5.25689e-06	0.863973	0.66323	0.190185	0.0734477	0.858172	0.293094	-0.513586	0.426045	0.980671	1.06952	1.26859	0.920847	1.98013e-06	1.39557	9.08326e-06	0.955109	0.0238157	0.978677	Cdk4	Interaction_cannot classify2
6692	ONLI_0864	HILICPOS	Hypoxanthine	3.25691e-07	1	0.980393	0.883616	34	6	0.0280907	0.000827304	0.00193994	0.258643	0.00189201	0.765306	0.429505	0.347472	0.275884	-0.583079	0.0293037	1.27802	0.631455	0.613133	1.60264	0.640428	2.2996	0.0866354	0.529842	0.140939	0.00676971	2.39094	0.127174	Cdk4	One sex_Male only
6772	ONLI_0877	HILICPOS	Nicotinamide	0.0422177	1	0.96844	0.795036	40	6	0.00862118	0.634571	0.0667991	0.159691	0.712199	0.863973	0.0106306	-1.07443	0.0873381	-1.05128	0.0705114	-1.09759	0.426045	0.81215	0.622814	0.643584	0.601285	0.661814	-0.129685	0.752946	0.842218	-0.175999	0.905716	Cdk4	Genotype effect with no sex effect(real)
6811	ONLI_0882	HILICPOS	Pantothenic acid	0.0466195	1	0.341258	0.28472	40	6	0.0120479	5.38233e-12	0.0573532	0.172117	1.13015e-10	0.863973	0.154364	-0.614484	0.645893	-0.173845	0.00180131	-1.05512	0.868992	0.142123	0.864684	0.957987	0.689571	4.8076e-10	-1.44149	1.03911e-08	0.00390525	-2.32277	0.111159	Cdk4	Genotype effect with no sex effect(real)
6824	ONLI_0884	HILICPOS	Pipecolic acid	0.191307	1	0.888902	0.816688	35	6	2.60496e-05	9.76012e-06	0.239939	0.00411063	3.22549e-05	0.863973	0.000605088	1.40262	0.0016304	1.69115	0.0127796	1.01772	0.367424	0.458321	1.39232	1.51545	1.27006	2.06535e-05	1.12438	7.47504e-05	0.499123	0.450951	0.679782	Cdk4	Genotype effect with no sex effect(real)
6855	ONLI_0887	HILICPOS	Propionylcarnitine	0.0114583	1	0.65076	0.993258	39	6	0.000305071	0.215696	0.502523	0.0240701	0.291911	0.869497	0.000448381	1.42968	0.0194375	1.18318	0.0100773	1.66666	0.426045	0.41394	1.43938	1.3883	1.49157	0.189295	-0.371403	0.278645	0.869365	0.112081	0.919476	Cdk4	Genotype effect with no sex effect(real)
6951	ONLI_0914	HILICNEG	2,6-Dihydroxybenzoic acid	0.810609	1	0.795104	0.709602	37	6	0.0469522	0.827761	0.262759	0.285368	0.865113	0.863973	0.0538207	-0.827149	0.246571	-0.781427	0.121627	-0.869969	0.608718	0.980671	0.731445	0.717525	0.745669	0.896674	-0.0357903	0.929666	0.935827	-0.124333	0.965186	Cdk4	Genotype effect with no sex effect(real)
7013	ONLI_0923	HILICNEG	3-Hydroxy-4-methoxybenzoic acid	0.00080689	1	0.992363	0.890502	38	6	0.0473244	0.0232683	0.461654	0.285368	0.0415355	0.863973	0.0765667	0.761272	0.451891	0.49887	0.0295299	1.06214	0.752199	0.613133	1.45192	1.31225	1.73598	0.0225209	-0.730924	0.0423071	0.714919	-0.167651	0.835782	Cdk4	Genotype effect with no sex effect(real)
7083	ONLI_0935	HILICNEG	4-Pyridoxic acid	0.00336999	1	0.860672	0.999414	35	6	0.0343317	7.49805e-05	0.0829025	0.276247	0.000206852	0.863973	0.0939479	0.724818	0.0184143	1.31655	0.736348	0.158274	0.426045	0.983035	1.41709	1.69495	1.03537	0.00279535	-0.88146	0.00643011	0.00883195	-2.03973	0.129045	Cdk4	Genotype effect with no sex effect(real)
7151	ONLI_0966	HILICNEG	Ferulic acid	0.456224	1	0.842976	0.728452	36	6	0.0328558	0.650977	0.177442	0.276247	0.72443	0.863973	0.0384935	0.885898	0.0738014	1.05548	0.273703	0.712215	0.426045	0.980671	1.44734	1.52497	1.36905	0.818335	-0.0738144	0.877264	0.632964	-0.417079	0.791455	Cdk4	Genotype effect with no sex effect(real)
7162	ONLI_0968	HILICNEG	Galactonic acid	6.23133e-11	1	0.969066	0.710466	33	5	0.00687338	0.0847178	0.156901	0.154946	0.132099	0.863973	0.00897731	1.19295	0.0085214	1.94309	0.157476	0.791696	0.426045	0.980671	4.15043	7.46759	1.58898	0.28101	-0.33743	0.382271	0.135504	-1.48883	0.313528	Cdk4	Genotype effect with no sex effect(real)
7252	ONLI_1010	HILICNEG	Mannitol	0.164974	1	0.98455	0.999781	33	6	0.00327675	0.178702	0.230703	0.103414	0.25133	0.863973	0.00443846	1.19271	0.0159801	1.62992	0.134499	0.740195	0.426045	0.980671	1.27159	1.31444	1.22904	0.0958065	0.504856	0.153641	0.686244	-0.384871	0.821395	Cdk4	Genotype effect with no sex effect(real)
727	ONLI_1016	HILICNEG	N-Acetylhistidine	0.338754	1	0.915728	0.325522	36	6	0.236701	0.901337	0.0458166	0.537989	0.921185	0.863973	0.251141	0.500451	0.0702874	1.31841	0.519822	-0.317513	0.426045	0.980671	1.24102	1.68217	0.845885	0.4087	0.27009	0.515118	0.108701	-1.36584	0.274888	Cdk4	Interaction_cannot classify2
7292	ONLI_1021	HILICNEG	N-epsilon-Acetyllysine	0.503329	1	0.99867	0.931321	35	5	0.308495	0.00995788	0.0425719	0.598042	0.0184431	0.863973	0.324082	0.467179	0.0248406	1.54246	0.800766	-0.146022	0.426045	0.984011	1.16919	1.4953	0.952919	0.0854816	-0.544159	0.139349	0.0120632	-2.23264	0.134234	Cdk4	Interaction_One sex_Female only2
7301	ONLI_1022	HILICNEG	N-Isovalerylglycine	0.223157	1	0.749849	0.752304	38	6	0.0438943	0.0677378	0.0474099	0.285368	0.108628	0.863973	0.0503268	0.837827	0.0819156	1.01154	0.281465	0.664111	0.426045	0.980671	1.4429	1.55923	1.35981	0.058833	0.570787	0.100475	0.822031	0.223354	0.893364	Cdk4	cannot classify
7551	ONLI_1092	BileAcid_Steroids	Tauro-omega-Muricholic acid	0.018418	1	0.941114	0.846221	36	6	8.46778e-05	2.33722e-05	0.597108	0.0095444	7.14753e-05	0.886318	0.00122077	-1.33281	0.0027941	-1.46314	0.02468	-1.14442	0.367424	0.613133	0.355571	0.355308	0.372189	0.000178463	-1.045	0.000531349	0.106404	-0.726283	0.274888	Cdk4	Genotype effect with no sex effect(real)
7582	ONLI_1095	BileAcid_Steroids	Tauroursodeoxycholic acid	0.000622878	1	0.853262	0.998226	22	6	0.00941608	1.15628e-07	0.186987	0.159691	5.52911e-07	0.863973	0.0894745	-0.760024	0.00872681	-1.01511	0.40702	-0.361254	0.426045	0.980671	0.413531	0.383481	0.633816	7.67153e-06	-1.58049	3.02642e-05	0.00733331	-0.926625	0.12824	Cdk4	Genotype effect with no sex effect(real)
7632	ONLI_1101	BileAcid_Steroids	Glycocholic acid	2.73893e-06	1	0.879446	0.544248	28	6	0.00891999	5.84753e-10	0.00327032	0.159691	4.394e-09	0.827474	0.444506	0.341712	0.181035	-0.506131	0.0125553	0.934791	0.533108	0.458321	0.726253	0.511577	2.30711	1.43081e-08	-1.78335	1.09603e-07	0.102937	-0.342432	0.274382	Cdk4	One sex_Male only
778	ONLI_1129	Oxylipins	PGD2	4.67492e-06	1	0.955851	0.874343	16	6	0.00179775	0.248585	0.171057	0.0709214	0.328532	0.863973	0.00327256	-1.26749	0.00274733	-1.75537	0.242232	-0.805541	0.367424	0.980671	0.14724	0.0219154	0.224419	0.805285	0.103693	0.865627	0.136778	1.05352	0.31387	Cdk4	Genotype effect with no sex effect(real)
7812	ONLI_1135	Oxylipins	9,12,13-TriHOME	1.86203e-08	1	0.817255	0.87022	33	5	0.0228531	0.637605	0.0188777	0.236092	0.714589	0.827474	0.0278049	1.01802	0.644707	0.309778	0.00107788	2.07397	0.868992	0.0944946	2.43091	1.28233	4.26491	0.942832	-0.0222847	0.961104	0.14719	1.74191	0.328989	Cdk4	One sex_Male only
7822	ONLI_1138	Oxylipins	9,10-e-DiHO	3.51876e-06	1	0.515422	0.650879	38	4	0.0299639	0.314272	0.018686	0.267152	0.402533	0.827474	0.0352753	1.07324	0.859899	0.131663	0.00327884	2.01482	0.954134	0.220896	2.16994	0.93255	3.3992	0.693692	0.119195	0.78189	0.0178218	2.00236	0.145519	Cdk4	One sex_Male only
7843	ONLI_1140	Oxylipins	9,10-DiHOME	0.166473	1	0.947509	0.899379	36	6	0.0304736	0.441176	0.0748083	0.267152	0.539671	0.863973	0.0358436	0.897691	0.454867	0.416598	0.0360781	1.38451	0.753971	0.699244	1.36837	1.16805	1.56302	0.735029	0.103025	0.807713	0.326642	1.07093	0.529201	Cdk4	Genotype effect with no sex effect(real)
7872	ONLI_1143	Oxylipins	9,10-DiHODE	0.0270679	1	0.837463	0.881492	38	6	0.0486987	0.195683	0.0738838	0.285368	0.269919	0.863973	0.0555493	0.819991	0.502694	0.409123	0.039863	1.2451	0.792051	0.714816	1.4987	1.19545	1.77778	0.365819	0.270485	0.476289	0.310687	1.10646	0.516068	Cdk4	Genotype effect with no sex effect(real)
795	ONLI_1153	Oxylipins	6-trans-LTB4	0.0440359	0.999768	0.231553	0.0366154	13	5	0.00858521	0.226836	0.0113212	0.159691	0.305416	0.827474	0.0146589	-1.1727	0.258623	-0.839088	0.00020955	-1.72588	0.612774	0.0572997	0.709692	0.866751	0.431764	0.426133	-0.343006	0.531152	0.221501	-1.2298	0.412202	Cdk4	One sex_Male only
7972	ONLI_1157	Oxylipins	9-HODE	7.96801e-05	1	0.50669	0.474547	37	5	0.00147491	0.675803	0.00509873	0.0646504	0.745666	0.827474	0.00204233	1.38126	0.178403	0.894674	0.000375606	2.1187	0.533108	0.0634592	2.06465	1.61389	2.74593	0.905864	0.0349577	0.934283	0.107469	1.25898	0.274888	Cdk4	One sex_Male only
8131	ONLI_1175	Oxylipins	9-KODE	0.155825	1	0.744943	0.86124	39	5	0.0149389	0.321268	0.0798439	0.192215	0.4095	0.863973	0.0180814	1.08294	0.0814533	1.14614	0.166505	0.927216	0.426045	0.980671	1.73667	1.7921	1.58973	0.481658	-0.215994	0.590106	0.608532	-0.43492	0.771916	Cdk4	Genotype effect with no sex effect(real)
8181	ONLI_1180	Oxylipins	1213-EpOME	0.0140956	1	0.923792	0.930205	39	6	0.00218087	0.366357	0.0137742	0.0819385	0.459676	0.827474	0.00289667	1.2371	0.0848479	1.0747	0.0135589	1.40748	0.426045	0.46513	1.39176	1.33189	1.46223	0.286377	-0.311602	0.388232	0.979003	0.0211777	0.988618	Cdk4	One sex_Male only
23	ONLI_0002	gctof	xylose	0.000107037	1	0.789814	0.659182	35	6	0.0344949	0.0554903	0.460338	0.19599	0.0884026	0.662521	0.0404647	0.878805	0.0623632	1.16983	0.289989	0.6007	0.345633	0.624333	1.68056	1.8214	1.49809	0.165288	-0.452247	0.247303	0.125784	-1.02138	0.35997	Dhfr	Genotype effect with no sex effect(real)
8	ONLI_0009	gctof	tyrosine	0.133625	1	0.719298	0.955227	40	6	0.263009	0.0230256	0.0428046	0.542842	0.0401799	0.20172	0.276367	0.471896	0.0998436	0.965974	0.970284	-0.0221812	0.375966	0.991433	1.13443	1.28219	0.966202	0.1032	-0.503152	0.163418	0.0489408	-1.49131	0.246185	Dhfr	Interaction_cannot classify2
1210	ONLI_0015	gctof	threonic acid	0.318573	1	0.352584	0.65993	38	6	0.0481773	0.120354	0.0753539	0.212822	0.174741	0.265345	0.0549837	0.822232	0.0497211	1.02039	0.333653	0.650845	0.308114	0.639877	1.21574	1.28445	1.16361	0.119048	0.508727	0.184068	0.696867	0.139178	0.87053	Dhfr	Genotype effect with no sex effect(real)
141	ONLI_0018	gctof	sucrose	3.91509e-14	1	0.849247	0.400722	38	6	0.000786899	0.00579518	0.0014946	0.02949	0.0113171	0.090481	0.0468022	0.850403	0.000155278	2.0651	0.55875	-0.364295	0.0611017	0.809828	12.5995	28.0623	0.72381	0.471676	0.201998	0.579109	0.0399361	-2.2274	0.23393	Dhfr	One sex_Female only
157	ONLI_0019	gctof	succinic acid	0.380005	1	0.87039	0.897982	38	6	0.00157802	0.0431057	0.151198	0.0428243	0.0703518	0.377756	0.00324316	1.22483	0.00407556	1.74384	0.191673	0.705823	0.166415	0.568288	1.41184	1.69172	1.19216	0.0258145	0.661472	0.0481423	0.485217	-0.376548	0.722724	Dhfr	Genotype effect with no sex effect(real)
2710	ONLI_0033	gctof	phenylethylamine	0.000376122	1	0.959858	0.700868	40	6	0.0138103	0.00862347	0.016896	0.126996	0.016236	0.141165	0.114256	0.679576	0.0174798	1.59651	0.620561	-0.237362	0.221486	0.837704	1.75398	2.47437	0.728225	0.320681	-0.291349	0.426311	0.0109783	-2.12522	0.19533	Dhfr	One sex_Female only
284	ONLI_0034	gctof	phenylalanine	0.955963	1	0.541701	0.810463	39	5	0.028081	0.0160858	0.0094285	0.178072	0.0286414	0.137163	0.586855	0.256918	0.0166811	1.64231	0.298987	-0.65142	0.221486	0.624333	1.04491	1.31281	0.865709	0.725102	-0.105008	0.804874	0.0574965	-2.39874	0.252792	Dhfr	One sex_Female only
31	ONLI_0039	gctof	palmitic acid	0.682291	1	0.952191	0.910367	40	6	0.00278206	0.261335	0.339341	0.0637817	0.341079	0.584379	0.00362814	-1.21024	0.0177941	-1.57142	0.101902	-0.84905	0.221486	0.509512	0.84516	0.801451	0.887628	0.50859	0.195179	0.617685	0.135454	0.917549	0.372736	Dhfr	Genotype effect with no sex effect(real)
3810	ONLI_0048	gctof	methionine	0.0623915	1	0.77201	0.506166	39	5	0.0083704	0.0263895	0.00991519	0.101749	0.045545	0.137163	0.10977	0.745916	0.0141502	2.08795	0.742472	-0.15312	0.221486	0.889655	1.31898	1.83615	0.970953	0.938123	0.0231072	0.962585	0.0371368	-2.21797	0.23393	Dhfr	One sex_Female only
402	ONLI_0050	gctof	maltose	8.65914e-05	1	0.580867	0.774879	39	6	0.0484135	0.00250928	0.0138993	0.212822	0.00535177	0.141165	0.964297	0.0195712	0.0838216	0.978235	0.119344	-0.915159	0.352895	0.526776	1.02393	1.66567	0.61144	0.00250924	0.933443	0.00585987	0.211737	-0.959951	0.46754	Dhfr	cannot classify
46	ONLI_0058	gctof	lactic acid	0.428336	1	0.595769	0.228463	40	6	0.0821902	0.0301509	0.0255508	0.268397	0.0513609	0.160868	0.919526	0.0440954	0.170314	0.946696	0.0899071	-0.858506	0.482006	0.488926	0.993211	1.34191	0.714186	0.044694	0.637044	0.0786492	0.0694982	-1.16816	0.272488	Dhfr	Interaction_cannot classify2
536	ONLI_0065	gctof	indoxyl sulfate	3.34849e-06	1	0.858615	0.994244	39	4	0.00350588	0.00162665	0.419229	0.0672957	0.00363687	0.631497	0.0113953	1.27394	0.0280729	1.62017	0.0931138	0.946932	0.245482	0.498507	2.44319	2.69415	2.04271	0.00759227	-0.749704	0.0156827	0.239818	-1.42294	0.494076	Dhfr	Genotype effect with no sex effect(real)
547	ONLI_0066	gctof	indole-3-propionic acid	1.94791e-05	1	0.116467	0.0428196	38	5	7.48316e-05	0.357605	0.113478	0.00535386	0.437691	0.332636	0.000120852	1.66905	0.0713128	1.15959	1.8161e-05	2.36663	0.348045	0.0142927	2.60686	1.96606	3.71295	0.191093	-0.361667	0.279133	0.159164	0.845376	0.400197	Dhfr	Genotype effect with no sex effect(real)
6010	ONLI_0072	gctof	hippuric acid	2.1504e-05	1	0.904956	0.793938	40	6	0.0142035	0.716949	0.475586	0.127025	0.77293	0.676829	0.0170912	1.00769	0.0760784	1.29016	0.124088	0.725218	0.352895	0.529587	2.22662	2.63264	1.88119	0.580721	0.170709	0.67909	0.504299	-0.394228	0.729564	Dhfr	Genotype effect with no sex effect(real)
642	ONLI_0076	gctof	hexadecane	0.165201	1	0.989847	0.865071	39	6	0.00861945	0.0148758	0.00511993	0.10278	0.0265471	0.125622	0.209603	-0.543487	0.0134352	-1.65599	0.281946	0.566932	0.221486	0.620691	0.877203	0.529131	1.23716	0.787122	-0.0813284	0.852899	0.0133861	2.1416	0.19533	Dhfr	One sex_Female only
746	ONLI_0089	gctof	fucose	0.540128	1	0.964336	0.999748	40	6	0.00103973	0.401152	0.00219331	0.033797	0.484213	0.0973115	0.00142446	1.3145	0.235415	0.682183	0.00105266	1.94682	0.568319	0.0711726	1.53478	1.31178	1.75247	0.785129	0.0741635	0.852899	0.165994	1.3388	0.404951	Dhfr	One sex_Male only
751	ONLI_0090	gctof	fructose	0.0010459	0.067375	0.709867	0.0928957	36	6	0.00602306	0.0687779	0.0150967	0.0861846	0.106762	0.141165	0.0285443	0.888101	0.945016	0.0407372	0.00200938	1.71531	0.983766	0.112956	1.80691	0.929135	2.96718	0.22548	-0.362847	0.319859	0.0489516	1.31172	0.246185	Dhfr	One sex_Male only
762	ONLI_0091	gctof	ethanolamine	0.134018	1	0.99841	0.898497	38	6	0.0775741	0.00401454	0.00928909	0.256516	0.00822771	0.137163	0.506116	-0.290467	0.370231	0.548038	0.0393163	-1.10351	0.68237	0.397777	0.980869	1.1547	0.791421	0.0940541	-0.48376	0.150448	0.0750705	-2.13531	0.277373	Dhfr	Interaction_One sex_Male only2
892	ONLI_0109	gctof	aminomalonate	6.07451e-07	0.377073	0.98792	0.158211	36	6	0.0188882	0.86973	0.133367	0.147178	0.903004	0.349865	0.0227842	-0.940637	0.0491538	-0.84276	0.152275	-1.03505	0.308114	0.56725	0.362641	0.500359	0.278339	0.848127	0.0622792	0.900777	0.705418	-0.130014	0.874877	Dhfr	Genotype effect with no sex effect(real)
923	ONLI_0113	gctof	alanine	0.0293459	1	0.921715	0.725575	36	5	0.00486266	0.0748014	0.0229631	0.0750375	0.115203	0.150599	0.0234408	1.04359	0.0064555	2.18604	0.636617	0.249672	0.175189	0.846314	1.325	1.76108	1.03769	0.527744	0.193675	0.635068	0.064481	-1.74269	0.266466	Dhfr	One sex_Female only
943	ONLI_0115	gctof	6-deoxyglucitol	0.161478	1	0.806848	0.95132	39	5	0.0147132	0.00741264	0.0188327	0.130104	0.014194	0.141571	0.697903	0.183666	0.18343	-0.813714	0.0145069	1.69946	0.495084	0.317137	0.992599	0.744094	1.35852	0.75665	0.0904999	0.829365	0.0547633	2.60367	0.24862	Dhfr	One sex_Male only
1006	ONLI_0121	gctof	3,6-anhydro-D-galactose	3.87642e-08	1	0.998418	0.974299	38	6	3.03044e-06	0.0234232	0.784342	0.000434028	0.0407833	0.881331	5.74781e-06	1.76333	0.000641691	1.86162	0.00171045	1.69025	0.0814865	0.103548	2.25427	2.61954	1.85949	0.067511	-0.478909	0.112328	0.046045	-0.650275	0.244847	Dhfr	Genotype effect with no sex effect(real)
1012	ONLI_0122	gctof	3-3-hydroxyphenylpropionic acid	2.09304e-06	1	0.98944	0.986576	40	6	0.0395841	0.0659397	0.0427093	0.20229	0.10317	0.20172	0.0453374	-0.853838	0.0897706	-1.03163	0.248592	-0.676043	0.355022	0.590011	0.163847	0.127095	0.229693	0.0629795	-0.56259	0.106362	0.797713	-0.207	0.917549	Dhfr	cannot classify
1052	ONLI_0126	gctof	2-deoxytetronic acid	0.620926	1	0.94324	0.995639	37	5	0.0436124	0.00877513	0.0197458	0.210863	0.0164429	0.142698	0.342442	-0.448511	0.0293622	-1.21668	0.292011	0.779661	0.248198	0.624333	0.911768	0.762996	1.13355	0.229648	0.351109	0.324476	0.111248	2.34745	0.340428	Dhfr	One sex_Female only
1123	ONLI_0159	CSHPOS	TAG 54:7; TAG 18:2-18:2-18:3;	0.000146764	1	0.684689	0.525658	39	6	0.0116671	0.00291349	0.00286518	0.118051	0.00613079	0.0984236	0.933847	0.0362914	0.0258046	1.21654	0.0726252	-1.12378	0.245482	0.460287	1.00385	2.42999	0.305356	0.0108449	0.787108	0.021553	0.0382551	-1.55321	0.23393	Dhfr	One sex_Female only
1201	ONLI_0168	CSHPOS	PC36:1	6.79128e-05	1	0.902229	0.999969	39	6	0.0746042	5.00693e-07	0.0335662	0.250912	2.33163e-06	0.176533	0.567104	-0.249757	0.388723	0.400339	0.0522532	-0.936507	0.698459	0.433623	0.863412	1.07056	0.722772	8.02314e-07	1.42954	4.04757e-06	0.830764	0.0926978	0.933648	Dhfr	Interaction_cannot classify2
1212	ONLI_0169	CSHPOS	TAG 53:5; TAG 17:1-18:2-18:2;	0.00222262	1	0.758924	0.946009	40	6	0.0219874	1.20996e-05	0.00576788	0.155892	4.12225e-05	0.125622	0.924542	-0.0413388	0.0548965	0.914009	0.073655	-0.996686	0.323775	0.460287	0.903432	1.54625	0.576221	1.57547e-05	1.27267	5.76695e-05	0.235803	-0.638023	0.493009	Dhfr	cannot classify
1222	ONLI_0170	CSHPOS	PC35:3	0.00645539	1	0.254994	0.254994	40	6	0.0299944	1.18627e-12	0.0101882	0.184419	1.33866e-10	0.138244	0.711659	0.16121	0.0278114	0.7828	0.213481	-0.46038	0.245482	0.571792	1.07689	1.50103	0.876155	1.79511e-11	1.72331	6.0296e-09	0.106224	0.480133	0.327837	Dhfr	One sex_Female only
1231	ONLI_0171	CSHPOS	TAG 49:0; TAG 15:0-16:0-18:0;	0.000690048	1	0.91045	0.981875	39	6	0.526221	0.0508878	0.0461543	0.768341	0.0815656	0.211183	0.56598	0.250478	0.0461178	1.05133	0.417428	-0.53076	0.307582	0.711074	1.15161	1.89401	0.704833	0.0152924	0.765042	0.0297164	0.282483	-0.81705	0.537173	Dhfr	Interaction_One sex_Female only2
124	ONLI_0172	CSHPOS	LPE 18:0	0.424238	1	0.778252	0.677574	39	6	0.307849	0.0133682	0.0355851	0.585116	0.0240201	0.181854	0.321656	-0.430829	0.969426	0.0212751	0.161068	-0.868317	0.993313	0.568288	0.957905	1.02859	0.882773	0.0574716	-0.57004	0.0985179	0.165473	-1.45963	0.404951	Dhfr	Interaction_cannot classify2
1273	ONLI_0176	CSHPOS	TAG 47:0; TAG 15:0-16:0-16:0;	0.0138283	1	0.628456	0.980521	39	6	0.0682076	0.00408101	0.0250823	0.240208	0.0083206	0.160868	0.603163	0.226938	0.0332562	1.10232	0.322344	-0.62505	0.254103	0.62949	1.05194	1.57023	0.720756	0.00355219	0.912354	0.0079646	0.224506	-0.815016	0.48275	Dhfr	Interaction_One sex_Female only2
1281	ONLI_0177	CSHPOS	DAG 36:3; DAG 18:1-18:2;	0.0401498	1	0.461085	0.61465	40	6	0.051536	7.21506e-05	0.0159964	0.217453	0.000215085	0.141165	0.763515	0.131256	0.0374505	0.988362	0.215058	-0.725851	0.275453	0.571792	1.0113	1.34991	0.790795	4.57115e-05	1.19331	0.000156413	0.498783	-0.520906	0.728278	Dhfr	Interaction_One sex_Female only2
129	ONLI_0178	CSHPOS	PC38:7	0.00261122	1	0.472667	0.979006	40	6	0.089525	1.36151e-06	0.0304975	0.276299	5.82343e-06	0.174975	0.771028	0.126968	0.0719856	0.828772	0.260005	-0.574837	0.348045	0.602804	0.992251	1.71367	0.703414	1.7295e-06	1.38449	7.86774e-06	0.967363	-0.0191225	0.981076	Dhfr	Interaction_cannot classify2
1311	ONLI_0180	CSHPOS	PC 39:7; PC 17:1-22:6;	0.00738085	1	0.991858	0.869958	37	6	0.0813053	8.66985e-06	0.0381412	0.266614	3.04606e-05	0.187607	0.578794	0.243167	0.0154089	0.986158	0.491192	-0.390436	0.221486	0.761182	1.02753	1.33766	0.862986	8.36132e-06	1.34911	3.27381e-05	0.961527	-0.0274853	0.980135	Dhfr	Interaction_One sex_Female only2
1321	ONLI_0181	CSHPOS	PC36:3 A	0.0105899	1	0.482775	0.977685	40	6	0.00940111	6.67762e-10	0.00238879	0.108804	5.41782e-09	0.0973115	0.821752	0.0983076	0.0186289	0.954794	0.0838296	-0.758179	0.222135	0.488696	0.948	1.30562	0.738012	3.23055e-09	1.61054	2.99111e-08	0.720542	-0.102429	0.881386	Dhfr	One sex_Female only
1341	ONLI_0183	CSHPOS	TAG 52:7; TAG 16:1-18:2-18:4;	0.00596848	1	0.905498	0.982804	40	6	0.665492	3.16204e-06	0.0402371	0.858594	1.22587e-05	0.194274	0.73995	0.144785	0.0702603	0.81564	0.318059	-0.52607	0.348045	0.627087	0.991208	1.5293	0.740843	1.56464e-06	1.36452	7.24335e-06	0.973932	0.0228071	0.982672	Dhfr	Interaction_cannot classify2
1372	ONLI_0186	CSHPOS	PEo-36:3	0.0432672	1	0.992155	0.95384	38	6	0.0415124	1.76477e-06	0.0253854	0.208029	7.34852e-06	0.160868	0.372504	0.388761	0.0143011	1.10608	0.524952	-0.328563	0.221486	0.795482	1.07604	1.28927	0.921677	1.91558e-06	1.38825	8.61465e-06	0.93415	-0.0463997	0.969895	Dhfr	One sex_Female only
140	ONLI_0189	CSHPOS	TAG 54:3; TAG 16:0-18:0-20:3;	0.167191	1	0.74996	0.787989	40	6	0.0494872	0.00426086	0.0142853	0.212822	0.00866484	0.141165	0.928263	0.0392949	0.0738545	0.993768	0.133332	-0.915178	0.348045	0.551873	1.00611	1.31496	0.760246	0.00502099	0.866167	0.0107087	0.14281	-1.04278	0.376913	Dhfr	cannot classify
149	ONLI_0198	CSHPOS	TAG 56:7; TAG 16:0-18:1-22:6;	0.000356791	1	0.544675	0.726201	38	6	0.0550368	0.00305036	0.0167055	0.220988	0.00636772	0.141165	0.775093	-0.125091	0.111223	0.821143	0.104233	-1.02207	0.403377	0.509512	0.880449	1.28125	0.633847	0.00298299	0.935906	0.00678501	0.208864	-0.907304	0.463032	Dhfr	Interaction_cannot classify2
1531	ONLI_0202	CSHPOS	PE 16:0-20:4	0.00090308	1	0.173945	0.896551	40	6	0.0521482	3.82618e-11	0.0261187	0.217453	5.37715e-10	0.162543	0.549471	-0.26072	0.418945	0.312871	0.0319856	-0.834311	0.718322	0.377352	0.775864	1.08355	0.661964	1.69047e-10	1.65487	6.0296e-09	0.314296	0.507684	0.560887	Dhfr	Interaction_One sex_Male only2
1563	ONLI_0206	CSHPOS	TAG 52:5; TAG 16:0-18:2-18:3;	0.000967116	1	0.838165	0.803261	39	6	0.0194928	0.000580029	0.00508633	0.14894	0.00144457	0.125622	0.865689	-0.0739398	0.0606932	0.993206	0.0610407	-1.11494	0.341183	0.448963	0.930428	1.88914	0.465385	0.000855349	1.01951	0.00223641	0.12227	-1.08864	0.355078	Dhfr	cannot classify
1581	ONLI_0208	CSHPOS	TAG 46:2; TAG 12:0-16:0-18:2;	0.001737	1	0.949437	0.875557	38	6	0.0452492	0.000108157	0.0128674	0.211339	0.000308518	0.141165	0.957888	0.0231294	0.0932927	0.914089	0.102208	-0.867831	0.360786	0.509512	0.886674	1.83793	0.470016	0.000112847	1.19184	0.00035103	0.284187	-0.590083	0.537173	Dhfr	cannot classify
160	ONLI_0210	CSHPOS	TAG 52:5; TAG 16:0-16:1-20:4;	0.141964	1	0.895675	0.952538	40	6	0.632641	0.00198685	0.0497311	0.847395	0.00436775	0.217734	0.675309	-0.182646	0.299201	0.550795	0.119754	-0.916088	0.639857	0.526776	0.964495	1.23885	0.768287	0.000767917	1.0314	0.00204173	0.485795	-0.435484	0.722724	Dhfr	Interaction_cannot classify2
161	ONLI_0211	CSHPOS	PC 38:5e; PC 18:1e/20:4; [M+H]+	0.563441	1	0.99892	0.998618	40	6	0.0460005	4.58343e-06	0.0138582	0.21171	1.70955e-05	0.141165	0.799432	0.110861	0.0495126	0.936922	0.175196	-0.715199	0.308114	0.568288	1.04254	1.21066	0.844808	0.000932921	-0.900265	0.00241516	0.00619013	-2.55239	0.19533	Dhfr	One sex_Female only
1623	ONLI_0212	CSHPOS	TAG 56:2; TAG 16:0-18:1-22:1;	3.52414e-06	1	0.999472	0.70887	37	6	0.0609117	5.84817e-10	0.0201785	0.231582	4.89629e-09	0.142698	0.812666	0.103968	0.0620846	0.748722	0.220846	-0.496323	0.345633	0.575372	0.820947	1.91882	0.587911	1.77893e-09	1.64512	2.00002e-08	0.461647	0.400079	0.705468	Dhfr	Interaction_cannot classify2
1643	ONLI_0214	CSHPOS	PE 40:7e; PE 18:1e/22:6;	0.653821	1	0.934486	0.997799	39	6	0.0105471	0.0663216	0.0279259	0.11217	0.103562	0.166497	0.0623118	-0.798627	0.844696	0.120577	0.00369359	-1.724	0.940276	0.145343	0.905289	1.01488	0.798151	0.415594	0.240481	0.521559	0.112558	-1.60409	0.340704	Dhfr	One sex_Male only
166	ONLI_0217	CSHPOS	TAG 50:4; TAG 14:0-16:0-20:4;	0.00300772	1	0.669001	0.996817	40	6	0.955906	3.08953e-06	0.0485133	0.987891	1.20369e-05	0.217734	0.966144	-0.0185261	0.177953	0.62874	0.195904	-0.665792	0.493129	0.568288	0.880075	1.40529	0.646008	3.25445e-06	1.35932	1.36237e-05	0.886993	0.0647834	0.951094	Dhfr	Interaction_cannot classify2
1682	ONLI_0220	CSHPOS	PC 36:4; PC 18:2-18:2;	0.00923921	1	0.306798	0.863289	40	6	0.095755	2.04953e-06	0.0327295	0.289843	8.48937e-06	0.175225	0.779933	0.121901	0.0783493	0.820336	0.261212	-0.576533	0.352895	0.602804	0.960305	1.44379	0.719945	2.80147e-06	1.36894	1.2114e-05	0.944171	-0.0279338	0.972595	Dhfr	Interaction_cannot classify2
1711	ONLI_0223	CSHPOS	TAG 49:4; TAG 15:2-16:0-18:2;	8.81683e-08	1	0.844577	0.917173	39	6	0.0206441	9.45332e-09	0.00682884	0.154732	6.09817e-08	0.125622	0.613304	0.22063	0.0201356	0.99282	0.191906	-0.5914	0.235252	0.568288	0.706098	2.0853	0.475923	2.43607e-08	1.55374	1.79177e-07	0.94299	-0.030478	0.972595	Dhfr	One sex_Female only
1726	ONLI_0224	CSHPOS	PC16:0/9:0COOH	0.000156233	1	0.911119	0.798771	39	6	7.88514e-06	0.200672	0.998445	0.000725657	0.27089	0.998914	1.40244e-05	1.70633	0.00250894	1.70944	0.0023843	1.71075	0.135008	0.113824	3.13466	3.36687	2.96908	0.273612	0.293369	0.375799	0.514106	0.294672	0.738324	Dhfr	Genotype effect with no sex effect(real)
1732	ONLI_0225	CSHPOS	PE 36:3; PE 18:1-18:2;	0.00175981	1	0.690837	0.706779	40	5	0.0981582	3.59513e-11	0.0323398	0.292455	5.1443e-10	0.174975	0.862036	-0.0821747	0.142021	0.565249	0.160267	-0.638912	0.459962	0.568288	0.841013	1.41083	0.658349	1.39893e-10	1.65759	6.0296e-09	0.383578	0.453432	0.628907	Dhfr	Interaction_cannot classify2
1742	ONLI_0226	CSHPOS	TAG 50:5; TAG 14:0-18:2-18:3;	0.00814914	1	0.919808	0.956958	38	6	0.0481899	7.25357e-07	0.0146151	0.212822	3.31893e-06	0.141165	0.808884	0.105906	0.0598667	0.884944	0.16801	-0.673132	0.338958	0.568288	1.02234	1.70437	0.722587	9.03247e-07	1.43308	4.47079e-06	0.820349	-0.124999	0.927607	Dhfr	cannot classify
1772	ONLI_0229	CSHPOS	PCo-38:4 A	0.74523	1	0.577687	0.74676	38	6	0.107916	0.281379	0.0435445	0.302242	0.362431	0.202778	0.118431	-0.673988	0.841068	0.130032	0.00642713	-1.50669	0.938894	0.210756	0.919211	1.01183	0.829559	0.0596637	0.544995	0.101197	0.384691	-1.09173	0.629421	Dhfr	Interaction_One sex_Male only2
1791	ONLI_0231	CSHPOS	PE34:2	0.000256468	1	0.401348	0.996387	40	6	0.0446627	6.46344e-11	0.014939	0.211339	7.48049e-10	0.141165	0.735542	-0.147331	0.208652	0.492687	0.0472806	-0.787348	0.531488	0.433623	0.762418	1.22079	0.604589	3.13164e-10	1.65433	6.84611e-09	0.392787	0.374296	0.637367	Dhfr	One sex_Male only
180	ONLI_0232	CSHPOS	TAG 52:6; TAG 16:0-16:1-20:5;	0.00170316	1	0.931699	0.991463	39	6	0.0996676	2.22385e-06	0.0322672	0.292591	9.16318e-06	0.174975	0.871162	-0.070901	0.167195	0.645616	0.139942	-0.752041	0.477633	0.559056	0.865693	1.4517	0.622453	2.49023e-06	1.37971	1.08878e-05	0.972758	-0.0179481	0.982672	Dhfr	Interaction_cannot classify2
1831	ONLI_0235	CSHPOS	TAG 56:4; TAG 18:1-18:2-20:1;	1.55035e-05	1	0.901617	0.999836	39	6	0.988254	1.26458e-07	0.0490855	0.994186	6.50474e-07	0.217734	0.960809	-0.0214844	0.180452	0.597706	0.197448	-0.602774	0.494828	0.568288	0.750076	1.51251	0.528896	2.13786e-07	1.47812	1.2463e-06	0.581237	0.277644	0.801109	Dhfr	Interaction_cannot classify2
1864	ONLI_0238	CSHPOS	TAG 46:3; TAG 12:0-16:1-18:2;	0.000283233	1	0.955486	0.997817	30	5	0.0181302	0.00120122	0.00502011	0.144787	0.00278866	0.125622	0.692572	-0.190359	0.0447822	1.24137	0.0679771	-1.08352	0.303824	0.460287	0.77007	1.95032	0.44132	0.00228209	1.10386	0.00540965	0.0861382	-1.22103	0.293467	Dhfr	One sex_Female only
1911	ONLI_0244	CSHPOS	TAG 54:2; TAG 18:0-18:1-18:1;	6.45759e-08	1	0.618587	0.72755	39	6	0.0766332	0.000177524	0.0237061	0.255552	0.000480108	0.154188	0.92297	0.0422753	0.0864599	0.873487	0.182582	-0.75917	0.352895	0.568288	0.759339	1.63968	0.46658	0.000136996	1.16091	0.000416278	0.452658	-0.471746	0.695785	Dhfr	Interaction_cannot classify2
193	ONLI_0246	CSHPOS	TAG 54:4; TAG 16:0-18:0-20:4;	0.133285	1	0.93673	0.997894	40	6	0.00464588	0.00563314	0.0114744	0.0731262	0.0110556	0.141165	0.419598	-0.350976	0.0719864	0.91067	0.0173526	-1.61262	0.348045	0.329831	0.95367	1.24949	0.689549	0.102617	0.486362	0.162822	0.0219904	-2.03693	0.198827	Dhfr	One sex_Male only
1942	ONLI_0247	CSHPOS	Cer-NS d35:1; Cer-NS d18:1/17:0;	0.369725	1	0.909535	0.885697	37	6	0.0349106	0.0134552	0.0341621	0.19599	0.0241213	0.176879	0.151633	0.621315	0.0331473	1.4061	0.638525	-0.228507	0.254103	0.847418	1.04191	1.10336	0.97913	0.00924092	0.802079	0.0187828	0.369668	-0.832531	0.618249	Dhfr	One sex_Female only
1961	ONLI_0250	CSHPOS	TAG 48:4; TAG 12:0-18:1-18:3;	0.00666262	1	0.628331	0.905514	39	5	0.0441525	6.51542e-05	0.0182959	0.211339	0.000196461	0.141165	0.655502	-0.211053	0.22071	0.75066	0.0487016	-1.07837	0.546223	0.433623	0.842187	1.6722	0.50308	6.55212e-05	1.20286	0.000219426	0.257671	-0.626175	0.508238	Dhfr	One sex_Male only
1971	ONLI_0251	CSHPOS	PC40:5 A	0.00309762	1	0.569106	0.775713	40	6	0.0430961	3.04081e-11	0.679675	0.210662	4.6373e-10	0.827324	0.229882	-0.519748	0.100882	-0.623397	0.28456	-0.416099	0.378067	0.620691	0.852363	0.850688	0.853226	1.34047e-09	1.49616	1.623e-08	0.0306562	1.70346	0.224983	Dhfr	Genotype effect with no sex effect(real)
2002	ONLI_0254	CSHPOS	TAG 50:4; TAG 14:0-18:2-18:2;	0.000123868	1	0.741284	0.974945	39	6	0.0851927	2.62984e-06	0.0293866	0.272548	1.05596e-05	0.173889	0.76954	0.128035	0.0650371	0.859389	0.27009	-0.56814	0.348045	0.612566	0.867013	1.57871	0.607602	3.46214e-06	1.37199	1.42655e-05	0.898132	-0.0555403	0.952161	Dhfr	Interaction_cannot classify2
2051	ONLI_0259	CSHPOS	TAG 53:3; TAG 17:0-18:1-18:2;	0.000153223	1	0.947742	0.855497	39	6	0.0498765	8.1548e-05	0.01611	0.21333	0.000239881	0.141165	0.724154	0.154192	0.0454508	1.02529	0.214723	-0.68616	0.305725	0.571792	0.99181	1.83193	0.610368	6.83347e-05	1.19913	0.000227879	0.420125	-0.512317	0.663933	Dhfr	One sex_Female only
2082	ONLI_0262	CSHPOS	TAG 55:3; TAG 15:0-19:0-21:3;	0.00174364	1	0.992602	0.997568	40	6	0.100659	2.34587e-06	0.0321283	0.292591	9.5585e-06	0.174975	0.98766	-0.00675085	0.138891	0.696925	0.165124	-0.710427	0.453557	0.568288	0.92159	1.57865	0.65015	1.48348e-06	1.36484	6.94938e-06	0.95336	-0.0425166	0.975675	Dhfr	Interaction_cannot classify2
2092	ONLI_0263	CSHPOS	PC34:2	0.0935742	1	0.933116	0.815285	40	6	0.0579903	7.77306e-10	0.0175508	0.227057	6.17919e-09	0.141165	0.878361	0.0667934	0.080241	0.725672	0.154967	-0.592085	0.352895	0.56725	0.99085	1.17997	0.865738	3.86029e-09	1.60416	3.45233e-08	0.344377	0.286402	0.590033	Dhfr	Interaction_cannot classify2
2121	ONLI_0266	CSHPOS	TAG 49:3; TAG 15:0-16:1-18:2;	0.000222119	1	0.995988	0.62301	39	6	0.0834485	3.6064e-07	0.0313675	0.270263	1.72014e-06	0.174975	0.69743	0.169842	0.0716708	0.86223	0.29354	-0.485523	0.348045	0.624333	0.991276	2.0779	0.665272	4.95967e-07	1.44389	2.65528e-06	0.852649	0.0961394	0.940409	Dhfr	Interaction_cannot classify2
2183	ONLI_0272	CSHPOS	PCp-32:0 or PC o-32:1	0.330957	1	0.93049	0.96043	40	6	0.00463882	0.00081946	0.888787	0.0731262	0.00196621	0.931461	0.0157765	-1.01931	0.044267	-0.97114	0.0704294	-1.06747	0.303824	0.460287	0.844419	0.869889	0.822969	0.000654257	0.913881	0.00176336	0.439404	0.817549	0.683049	Dhfr	Genotype effect with no sex effect(real)
219	ONLI_0273	CSHPOS	TAG 58:0; TAG 18:0-18:0-22:0;	1.52609e-07	1	0.998318	0.746038	31	6	0.010045	0.0371982	0.0266975	0.110203	0.0618921	0.162806	0.117944	-0.683541	0.363184	0.349119	0.024382	-1.68734	0.674117	0.368124	0.668597	1.09642	0.399097	0.373966	0.298242	0.479334	0.0543073	-1.73821	0.24862	Dhfr	One sex_Male only
2202	ONLI_0274	CSHPOS	PE 38:7e; PE 16:1e/22:6; [M+H]+	0.0202491	1	0.252789	0.995399	40	5	0.0356118	6.32131e-10	0.302392	0.19599	5.23671e-09	0.556111	0.101744	-0.761892	0.352215	-0.372234	0.0467552	-0.969864	0.667012	0.433623	0.805745	0.915786	0.768427	9.51053e-10	1.50607	1.33291e-08	0.37362	0.908436	0.619726	Dhfr	Genotype effect with no sex effect(real)
2343	ONLI_0289	CSHPOS	LPC 17:1	0.206267	1	0.963449	1	40	6	0.0491911	1.64471e-08	0.0188494	0.212822	1.01124e-07	0.141571	0.617463	0.217688	0.0328606	0.911632	0.299899	-0.476256	0.254103	0.624333	1.08119	1.37213	0.902227	4.75389e-08	1.52457	3.25332e-07	0.677668	0.136684	0.859662	Dhfr	One sex_Female only
2371	ONLI_0292	CSHPOS	TAG 52:3; TAG 16:1-18:1-18:1;	0.000641359	1	0.827044	0.903022	39	6	0.0239187	0.000187783	0.00656756	0.162276	0.000506113	0.125622	0.787505	-0.117807	0.0868597	0.890773	0.0559736	-1.09764	0.352895	0.440103	0.905228	1.58557	0.557967	0.000187036	1.12104	0.000549242	0.250235	-0.867379	0.501105	Dhfr	cannot classify
2382	ONLI_0293	CSHPOS	TAG 51:4; TAG 15:0-16:0-20:4;	0.015112	1	0.994783	0.990763	40	6	0.0125521	2.89217e-05	0.00921049	0.121957	9.29036e-05	0.137163	0.23988	0.508939	0.00444054	1.40875	0.475945	-0.390871	0.166415	0.756704	1.21655	2.0387	0.793127	2.94611e-05	1.21597	0.000104441	0.324929	-0.583646	0.573361	Dhfr	One sex_Female only
2432	ONLI_0299	CSHPOS	TAG 51:4; TAG 16:0-17:2-18:2;	0.00599043	1	0.988323	0.977185	40	6	0.0152999	2.25123e-06	0.00550152	0.13088	9.22771e-06	0.125622	0.519005	0.280807	0.00963749	1.20312	0.227016	-0.641504	0.221486	0.575372	1.05761	1.90558	0.670063	3.08723e-06	1.34627	1.32046e-05	0.339594	-0.498352	0.586097	Dhfr	One sex_Female only
2442	ONLI_0300	CSHPOS	PC37:2	0.000542954	1	0.182824	0.182824	40	6	0.100752	2.89495e-12	0.0333001	0.292591	1.33866e-10	0.176533	0.888381	-0.0612548	0.212813	0.458452	0.110059	-0.580961	0.535093	0.521786	0.834671	1.12694	0.731753	4.47846e-11	1.70145	6.0296e-09	0.0437487	0.662034	0.240771	Dhfr	Interaction_cannot classify2
247	ONLI_0303	CSHPOS	PC35:1	0.00843803	1	0.958179	0.856784	40	6	0.0315528	4.39163e-11	0.0110637	0.191602	5.92481e-10	0.141165	0.674061	0.18339	0.0280501	0.847389	0.227958	-0.48061	0.245482	0.575372	1.00658	1.39766	0.814105	2.4935e-10	1.66222	6.76685e-09	0.40145	0.334218	0.643741	Dhfr	One sex_Female only
2492	ONLI_0306	CSHPOS	PC35:2 A	0.00872665	1	0.9998	0.973493	40	6	0.0141675	3.56969e-10	0.00677022	0.127025	3.09847e-09	0.125622	0.47421	0.311448	0.0089705	1.05291	0.307811	-0.430016	0.220618	0.626097	1.06983	1.37472	0.887278	1.43458e-09	1.61592	1.66032e-08	0.73318	0.132995	0.889138	Dhfr	One sex_Female only
250	ONLI_0307	CSHPOS	TAG 53:3; TAG 17:0-17:0-19:3;	0.0220373	1	0.955119	0.940523	40	6	0.027897	0.000173741	0.00942932	0.178072	0.000471496	0.137163	0.574611	0.244543	0.0225521	1.1885	0.219059	-0.699418	0.239845	0.575372	1.08361	1.76544	0.708981	0.00016111	1.12191	0.000482473	0.273689	-0.766015	0.525349	Dhfr	One sex_Female only
2523	ONLI_0310	CSHPOS	DAG 36:4; DAG 18:2-18:2;	0.108544	1	0.266387	0.599573	40	6	0.0288309	0.000212756	0.00930629	0.178661	0.00056759	0.137163	0.616983	0.217985	0.0148909	1.16859	0.228805	-0.732622	0.221486	0.575372	1.03789	1.50151	0.733615	0.000171762	1.10828	0.000508183	0.316361	-0.792933	0.562022	Dhfr	One sex_Female only
2531	ONLI_0311	CSHPOS	TAG 55:4; TAG 18:1-18:2-19:1;	0.000141311	1	0.916016	0.968855	39	6	0.0117001	1.0783e-06	0.00287642	0.118051	4.79446e-06	0.0984236	0.904568	-0.052417	0.043458	0.946592	0.0489903	-1.0158	0.302668	0.433623	0.84351	1.5715	0.545103	1.84487e-06	1.38946	8.34432e-06	0.263536	-0.572929	0.513633	Dhfr	Different direction
2542	ONLI_0312	CSHPOS	TAG 48:4; TAG 12:0-18:2-18:2;	0.000798417	1	0.948852	0.923883	39	6	0.017759	0.00012153	0.00452182	0.144787	0.000342812	0.125622	0.967279	-0.0179358	0.0489068	1.03007	0.0671638	-1.03672	0.308114	0.460287	0.939655	1.91323	0.490976	0.000170672	1.13986	0.000506862	0.137725	-0.926928	0.376913	Dhfr	One sex_Female only
2551	ONLI_0313	CSHPOS	PE 18:1-18:1;	0.0120761	1	0.496637	0.9971	40	6	0.00977511	1.19168e-07	0.00251856	0.1099	6.17009e-07	0.0973115	0.785189	-0.118918	0.0577261	0.833927	0.0333306	-1.07176	0.329206	0.377352	0.880371	1.46895	0.599191	1.32556e-07	1.45894	7.90318e-07	0.502921	-0.446751	0.729564	Dhfr	One sex_Male only
261	ONLI_0319	CSHPOS	TAG 55:4; TAG 15:1-19:0-21:3;	0.00272741	1	0.992588	0.978067	40	6	0.0997016	1.89279e-05	0.0320225	0.292591	6.23275e-05	0.174975	0.924322	0.0414597	0.116129	0.778214	0.192284	-0.695295	0.415087	0.568288	0.970047	1.58814	0.679319	1.21219e-05	1.27392	4.54282e-05	0.775259	-0.199593	0.908288	Dhfr	Interaction_cannot classify2
2641	ONLI_0322	CSHPOS	TAG 54:4; TAG 16:1-18:0-20:3;	0.0102517	1	0.785655	0.920805	39	6	0.00836394	0.00127405	0.00244763	0.101749	0.00293927	0.0973115	0.551697	-0.259708	0.0736512	0.916089	0.0256472	-1.41284	0.348045	0.368124	0.903167	1.5799	0.486297	0.00331613	0.883805	0.00747791	0.0928525	-1.44513	0.30751	Dhfr	One sex_Male only
2691	ONLI_0327	CSHPOS	PC33:1	0.000782439	1	0.386617	0.886749	40	6	0.0257696	7.49267e-12	0.00905944	0.170426	1.68478e-10	0.137163	0.66896	0.186433	0.0213372	0.844032	0.226423	-0.471166	0.236512	0.575372	0.99024	1.69402	0.752131	8.62591e-11	1.69433	6.0296e-09	0.145331	0.379135	0.377477	Dhfr	One sex_Female only
2704	ONLI_0328	CSHPOS	TAG 54:5; TAG 18:0-18:2-18:3;	0.11475	1	0.971844	0.940538	39	6	0.00966303	0.00703578	0.00232521	0.1099	0.0135383	0.0973115	0.947722	-0.028668	0.0280185	1.18558	0.056982	-1.25718	0.245482	0.440103	0.976451	1.6135	0.487267	0.0704017	0.556279	0.116891	0.0251773	-1.88649	0.213559	Dhfr	One sex_Female only
2742	ONLI_0332	CSHPOS	PC35:4	0.0185376	1	0.960894	0.338197	39	5	0.0125075	3.02201e-11	0.242457	0.121957	4.6373e-10	0.48677	0.0759375	0.824869	0.0159063	1.06912	0.266451	0.435748	0.221486	0.609584	1.28191	1.45849	1.13666	5.54962e-10	1.5574	9.09906e-09	0.165216	0.924027	0.404951	Dhfr	Genotype effect with no sex effect(real)
2793	ONLI_0337	CSHPOS	DAG 36:5; DAG 18:2-18:3;	0.0496147	1	0.974926	0.651668	40	6	0.017401	0.000603785	0.00653074	0.144154	0.00149427	0.125622	0.451143	0.327823	0.0161106	1.34472	0.222471	-0.68907	0.221486	0.575372	1.09179	1.7013	0.716559	0.000617162	1.00915	0.00167485	0.230853	-1.02463	0.49103	Dhfr	One sex_Female only
2823	ONLI_0340	CSHPOS	TAG 54:6; TAG 18:1-18:2-18:3;	0.000110009	1	0.843326	0.745165	38	6	0.00835597	0.00192409	0.00202649	0.101749	0.00424163	0.0973115	0.866939	0.0733779	0.0122708	1.29845	0.0827706	-1.10827	0.221486	0.488696	1.02724	2.59535	0.309618	0.00815328	0.825125	0.0167975	0.0316218	-1.5816	0.228213	Dhfr	One sex_Female only
2831	ONLI_0341	CSHPOS	LPE 18:1	0.167332	1	0.241315	0.316406	39	6	0.00840368	0.0099349	0.0227101	0.101749	0.0184841	0.150599	0.573332	-0.24577	0.0672989	0.972423	0.0288106	-1.4726	0.348045	0.377352	0.952471	1.16559	0.753494	0.259633	0.336791	0.358476	0.0399918	-2.10823	0.23393	Dhfr	One sex_Male only
290	ONLI_0348	CSHPOS	PC39:6	0.648657	1	0.714452	0.965494	40	6	0.00359864	0.000220759	0.5409	0.0674317	0.00058695	0.731452	0.0135509	1.04092	0.0299603	1.24912	0.089032	0.832715	0.248198	0.488926	1.19896	1.29442	1.12015	0.000417626	0.970294	0.00116138	0.524479	0.553885	0.74912	Dhfr	Genotype effect with no sex effect(real)
2922	ONLI_0350	CSHPOS	TAG 53:4; TAG 17:1-18:1-18:2;	0.00412177	1	0.969864	0.968658	39	6	0.0182134	1.88173e-05	0.00543739	0.144787	6.22234e-05	0.125622	0.679264	0.1806	0.0147081	1.16368	0.170139	-0.770187	0.221486	0.568288	1.01618	1.8544	0.627405	2.27834e-05	1.25937	8.18747e-05	0.25953	-0.674494	0.510625	Dhfr	One sex_Female only
2942	ONLI_0352	CSHPOS	TAG 56:8; TAG 16:0-18:2-22:6;	0.00242654	1	0.894676	0.822224	38	6	0.110778	0.00503911	0.0374316	0.308065	0.00996427	0.187607	0.778429	-0.123187	0.20021	0.705255	0.135998	-0.902955	0.519901	0.55456	0.913503	1.23529	0.705878	0.00383292	0.924806	0.00847335	0.286907	-0.683404	0.540181	Dhfr	Interaction_cannot classify2
[truncated: 4,686 more rows]

## Sheet: summary_KO metabolomics
SI Data 5b. Summary of Genotype Effect and Genotype-Sex Interaction Effect on Metabolomics Data of 30 KO lines (for Figure 3a & 3c).
[truncated: 36 more rows]

## Sheet: summary exclude lipids
SI Data 5c. Summary of Genotype Effect and Genotype-Sex Interaction Effect on Metabolomics Data of 30 KO lines after excluding lipids (for Figure 3c).
[truncated: 36 more rows]
