# Supplementary material for: Sexual Dimorphism of the Mouse Plasma Metabolome Is Associated with Phenotypes of 30 Gene Knockout Lines
Source: Metabolites. 2023 Aug 15;13(8):947. doi: 10.3390/metabo13080947 (PMC10456929; doi:10.3390/metabo13080947)
Supplement: Supplementary file 1 [file metabolites-13-00947-s001.zip › Supplementary Data S6_Knockout gene-sex interactions_Zhang et al_KOMP_08-2023.xlsx]

## Sheet: read_me
Sexual Dimorphism of the Mouse Plasma Metabolome Is Associated with Phenotypes of 30 Gene Knockout Lines
Ying Zhang 1,2, Dinesh K. Barupal 3, Sili Fan 1, Bei Gao 4, Chao Zhu 5, Ann M. Flenniken 6,7, Colin McKerlie 6,8, Lauryl M. J. Nutter 6,8, Kevin C. Kent Lloyd 9 and Oliver Fiehn 1,*
1	West Coast Metabolomics Center, University of California Davis, Davis, CA 95616, USA; ofiehn@ucdavis.edu (O.F.) ythzhang@ucdavis.edu (Y.Z.); slfan@ucdavis.edu (S.F.)
2	Department of Chemistry, University of California, Davis, Davis, CA 95616, USA
3	Department of Environmental Medicine and Public Health, Icahn School of Medicine at Mount Sinai, New York, NY 10029, USA; dinesh.barupal@mssm.edu
4	School of Marine Sciences, Nanjing University of Information Science and Technology,Nanjing 210044, China; wintergb2012@gmail.com
5	College of Medicine & Nursing, Dezhou University, Dezhou 253023, China; zhuchao@dzu.edu.cn
6	The Centre for Phenogenomics, Toronto, ON M5T 3H7, Canada; flenniken@lunenfeld.ca (A.M.F.); colin.mckerlie@sickkids.ca (C.M.); lauryl.nutter@sickkids.ca (L.M.J.N.)
7	Lunenfeld-Tanenbaum Research Institute, Mount Sinai Hospital, Toronto, ON M5G 1X5, Canada
8	The Hospital for Sick Children, Toronto, ON M5G 1X8, Canada
9	Department of Surgery, School of Medicine, and Mouse Biology Program, University of California, Davis, Davis, CA 95616, USA; kclloyd@ucdavis.edu
	*Correspondence: ofiehn@ucdavis.edu
Spreadsheet	Output
classification_KO phenotype	Genotype Effect and Genotype-Sex Interaction Effect on IMPC Phenotype Data of 30 KO lines
summary_KO phenotype	Summary of Genotype Effect and Genotype-Sex Interaction Effect on IMPC Phenotype Data of 30 KO lines (for Figure 3b)
summary_KO phenotype	Genotype Effect and Genotype-Sex Interaction Effect on IMPC Phenotype Data of 30 KO lines after excluding bodyweight
significant_exclude weight	Significant Genotype Effect and Genotype-Sex Interaction Effect on IMPC Phenotype Data of 30 KO lines after excluding bodyweight
	Classification of phenotypes with significant genotype effect

## Sheet: classification_KO phenotype
SI Data 6a. Genotype Effect and Genotype-Sex Interaction Effect on IMPC Phenotype Data of 30 KO lines.
Comment for row 3	label	Phenotype	Normality before data transformation	Normality after data transformation for males&females	Normality after data transformation for females	Normality after data transformation for males	number of wildtype mice	number pf mice per genotype	pvalue for Genotype effect	pvalue for Sex effect	pvalue for genotype-sex interaction	fdr for Genotype effect	fdr for Sex effect	fdr for genotype-sex interaction	pvalue for genotype effect without sex adjustment	estimate for genotype effect without sex adjustment	pvalue for genotype effect by KO vs. wildtype mice in females	estimate for genotype effect by KO vs. wildtype mice in females	pvalue for genotype effect by KO vs. wildtype mice in males	estimate for genotype effect by KO vs. wildtype mice in males	fdr for genotype effect by KO vs. wildtype mice in females	fdr for genotype effect by KO vs. wildtype mice in males	foldchange of Phenotype value by KO vs.wildtype mice without separating by sex	foldchange of Phenotype value by KO vs.wildtype mice in females	foldchange of Phenotype value by KO vs.wildtype mice in males	pvalue for sex effect in wildtype mice (male vs. female)	estimate for sex effect in wildtype mice (male vs. female)	fdr for sex effect in wildtype mice (male vs. female)	pvalue for sex effect in KO mice (male vs. female)	estimate for sex effect in KO mice (male vs. female)	fdr for sex effect in KO mice (male vs. female)	Genotype	direction of estimate value
	label	Phenotype	Normality_before	Normality_after	Normality_F	Normality_M	numb_null	numb_gene	pvalue_Stage1	pvalue_stage1.5	pvalue_stage2	fdr_Stage1	fdr_Stage1.5	fdr_Stage2	sep_allKO_pval	sep_allKO_estimate	sep_FvKO_pval	sep_FvKO_estimate	sep_MvKO_pval	sep_MvKO_estimate	sep_FvKO_fdr	sep_MvKO_fdr	foldchange_all	foldchange_FvKO	foldchange_MvKO	ctrl_sex_pval	ctrl_sex_estimate	fdr_ctrl_sex	KO_sex_pval	KO_sex_estimate	fdr_KO_sex	Genotype	est_dirct
22	IMPC_ACS_037_001	% Pre-pulse inhibition - Global	3.73726e-05	0.998267	0.781932	0.639167	39	6	0.784975	0.309536	0.660207	0.92623	0.548417	0.842528	0.790884	0.110257	0.811758	-0.171816	0.366793	0.387136	0.965814	0.836609	1.0794	1.03941	1.10719	0.510302	0.202576	0.798568	0.371231	0.761528	0.615923	A2m	Not significant
221	IMPC_ACS_037_001	% Pre-pulse inhibition - Global	2.95256e-05	1	0.864545	0.836651	40	6	0.619821	0.335995	0.692558	0.847419	0.679456	0.959047	0.629485	-0.2103	0.988214	0.0106426	0.405372	-0.431243	0.992161	0.793309	0.994936	1.14969	0.870668	0.310386	0.331333	0.687563	0.870529	-0.110553	0.987293	Ahcy	Not significant
222	IMPC_ACS_037_001	% Pre-pulse inhibition - Global	3.70115e-05	0.998267	0.81898	0.428059	39	6	0.045817	0.879905	0.0473633	0.240085	0.937648	0.373462	0.0522632	-0.789801	0.951563	-0.0419845	0.000310244	-1.5418	0.975962	0.00827317	0.430284	0.991974	-0.0320765	0.565165	0.163237	0.850743	0.157004	-1.33658	0.570924	Atp5b	One sex_Male only
223	IMPC_ACS_037_001	% Pre-pulse inhibition - Global	0.000417887	0.998267	0.704183	0.785929	39	6	0.0292636	0.297726	0.0921126	0.108687	0.557131	0.546514	0.0341174	-0.85852	0.113899	-1.1104	0.142206	-0.612367	0.287913	0.507112	0.567061	0.43624	0.67166	0.451575	0.223235	0.728543	0.290743	0.721266	0.646475	Atp6v0d1	Genotype effect with no sex effect(real)
224	IMPC_ACS_037_001	% Pre-pulse inhibition - Global	2.262e-05	0.998267	0.700216	0.737928	39	6	0.100428	0.396683	0.289387	0.229342	0.683674	0.677452	0.110355	-0.6543	0.237785	-0.856642	0.257672	-0.456641	0.562458	0.50638	0.567273	0.239829	0.833027	0.533563	0.182619	0.775334	0.548062	0.58262	0.871691	C8a	Not significant
225	IMPC_ACS_037_001	% Pre-pulse inhibition - Global	5.65047e-05	0.998267	0.772537	0.952177	39	6	0.532439	0.801494	0.542878	0.681209	0.919419	0.896279	0.544036	0.251837	0.286936	0.767901	0.534154	-0.269509	0.572513	0.731834	1.11809	1.41577	0.868941	0.487543	0.206007	0.815571	0.428333	-0.831404	0.786798	Cdk4	Not significant
226	IMPC_ACS_037_001	% Pre-pulse inhibition - Global	0.000574947	0.998267	0.668814	0.825752	39	6	0.0110197	0.253327	0.631721	0.0406217	0.481632	0.819058	0.0134845	-0.991878	0.0994747	-1.17252	0.0337666	-0.81746	0.369477	0.124473	0.61195	0.481715	0.715863	0.41543	0.242822	0.723495	0.150879	0.597883	0.810437	Dhfr	Genotype effect with no sex effect(real)
227	IMPC_ACS_037_001	% Pre-pulse inhibition - Global	2.00791e-05	0.998267	0.742029	0.690409	39	6	0.602649	0.422132	0.816535	0.857825	0.724181	0.945072	0.612894	0.210146	0.842919	0.144498	0.524394	0.270619	0.931703	0.982945	1.1242	1.18987	1.06518	0.519147	0.201844	0.827879	0.655473	0.327964	0.834556	Dync1li1	Not significant
228	IMPC_ACS_037_001	% Pre-pulse inhibition - Global	5.62503e-05	0.998267	0.673691	0.711221	39	6	0.901722	0.20248	0.271994	0.939742	0.402783	0.893578	0.904474	-0.0499179	0.37677	-0.641865	0.170231	0.53715	0.663832	0.589971	0.954417	0.683098	1.17238	0.531601	0.190284	0.792913	0.0930647	1.3693	0.458973	G6pd2	Not significant
229	IMPC_ACS_037_001	% Pre-pulse inhibition - Global	2.49112e-05	0.998267	0.598147	0.903344	39	6	0.904345	0.64639	0.796334	0.950854	0.82269	0.851892	0.907024	0.0485794	0.586287	0.404027	0.438934	-0.312542	0.805051	0.809199	1.07634	1.28596	0.899564	0.479301	0.2213	0.741105	0.509898	-0.495268	0.631733	Galc	Not significant
2210	IMPC_ACS_037_001	% Pre-pulse inhibition - Global	0.000113893	1	0.834119	0.945932	40	6	0.943765	0.164767	0.484887	0.962082	0.438305	0.822677	0.94531	0.0299409	0.692181	-0.266699	0.561862	0.326581	0.87167	0.931082	0.94361	0.966482	0.925244	0.286991	0.315672	0.696965	0.48837	0.908952	0.855907	Gnpda1	Not significant
2211	IMPC_ACS_037_001	% Pre-pulse inhibition - Global	4.78206e-05	1	0.685402	0.424184	40	6	0.469886	0.286151	0.621949	0.606892	0.569594	0.884978	0.482193	-0.305881	0.808443	-0.177582	0.381986	-0.43418	0.958352	0.579453	0.912325	0.956326	0.876991	0.295419	0.336543	0.594233	0.92023	0.0799452	0.988933	Idh1	Not significant
2212	IMPC_ACS_037_001	% Pre-pulse inhibition - Global	1.94641e-05	0.998267	0.797544	0.842228	39	6	0.524052	0.331216	0.706	0.730649	0.539621	0.830017	0.535794	-0.256988	0.651663	-0.327006	0.650299	-0.193365	0.881718	0.835475	0.989415	1.02567	0.955125	0.43748	0.249452	0.69599	0.314064	0.383093	0.641138	Iqgap1	Not significant
2213	IMPC_ACS_037_001	% Pre-pulse inhibition - Global	2.10441e-05	0.998267	0.706333	0.537163	39	6	0.988544	0.352972	0.787152	0.988544	0.603879	0.866477	0.988866	-0.00580472	0.799659	-0.185107	0.689861	0.168188	0.940005	0.83244	1.06206	1.04627	1.0701	0.510452	0.20706	0.83937	0.421878	0.560355	0.729172	Lmbrd1	Not significant
2214	IMPC_ACS_037_001	% Pre-pulse inhibition - Global	9.98599e-05	1	0.784291	0.550702	40	6	0.242021	0.459094	0.341136	0.610467	0.660052	0.755445	0.255217	-0.492938	0.997223	-0.0025338	0.0466958	-0.983342	0.997223	0.483635	0.862539	1.08193	0.686365	0.288172	0.338971	0.537921	0.383148	-0.641837	0.688624	Mfap4	Not significant
2215	IMPC_ACS_037_001	% Pre-pulse inhibition - Global	1.19822e-05	0.998267	0.612817	0.896439	39	6	0.424829	0.546072	0.790141	0.627318	0.770352	0.927415	0.437974	0.321501	0.583105	0.40655	0.567524	0.231655	0.813184	0.74724	1.16966	1.28628	1.06866	0.551537	0.187061	0.808189	0.985676	0.0121667	0.994292	Mvk	Not significant
2216	IMPC_ACS_037_001	% Pre-pulse inhibition - Global	3.73177e-05	1	0.663237	0.402592	40	6	0.358914	0.293137	0.55863	0.703769	0.544398	0.87079	0.372289	-0.38765	0.726243	-0.256703	0.293149	-0.518597	0.93293	0.894427	0.906414	0.961004	0.862577	0.309735	0.332928	0.651773	0.897387	0.0710339	0.949395	Nek2	Not significant
2217	IMPC_ACS_037_001	% Pre-pulse inhibition - Global	5.83325e-05	0.998267	0.666079	0.894635	39	6	0.560942	0.147999	0.157333	0.72773	0.326221	0.680203	0.572017	-0.234621	0.217683	-0.879235	0.311181	0.404266	0.624298	0.697934	0.972342	0.778691	1.12656	0.464327	0.223321	0.708954	0.0273338	1.50682	0.165054	Npc2	Not significant
2218	IMPC_ACS_037_001	% Pre-pulse inhibition - Global	2.27096e-05	0.998267	0.71805	0.80659	39	6	0.653532	0.332889	0.678255	0.808608	0.578593	0.869744	0.66267	-0.18126	0.561662	-0.424917	0.889275	0.0572285	0.91114	0.96169	0.933389	0.809549	1.03057	0.516993	0.2016	0.795374	0.369337	0.683746	0.743652	Phyh	Not significant
2219	IMPC_ACS_037_001	% Pre-pulse inhibition - Global	0.000133517	0.998267	0.894582	0.809093	39	6	0.124175	0.762447	0.327854	0.210143	0.885645	0.487127	0.135109	-0.613489	0.745605	-0.229212	0.0244351	-1.00264	0.882571	0.101703	0.639624	0.91399	0.41179	0.522368	0.189884	0.842126	0.52678	-0.58354	0.83024	Pipox	Not significant
2220	IMPC_ACS_037_001	% Pre-pulse inhibition - Global	7.9422e-05	0.998267	0.867236	0.804095	39	6	0.113525	0.529458	0.328478	0.184917	0.765778	0.51047	0.124036	-0.630981	0.613131	-0.358249	0.038435	-0.910121	0.857298	0.132016	0.798643	1.01542	0.617275	0.42072	0.249879	0.684267	0.575417	-0.301992	0.998034	Plk1	Not significant
2221	IMPC_ACS_037_001	% Pre-pulse inhibition - Global	3.38367e-05	1	0.879085	0.967484	40	6	0.0484223	0.0479564	0.10682	0.204589	0.124025	0.504742	0.876332	-0.0679161	0.197275	0.940394	0.0230072	-1.07623	0.636646	0.191726	0.871056	1.39033	0.454074	0.273429	0.323633	0.566344	0.155785	-1.69299	0.433593	Pmm2	Genotype effect with no sex effect(real)
2222	IMPC_ACS_037_001	% Pre-pulse inhibition - Global	3.46697e-05	0.998267	0.785333	0.696441	39	6	0.445067	0.362993	0.639649	0.681337	0.652335	0.871507	0.457978	0.307732	0.89514	0.0955619	0.223995	0.515	0.947673	0.831891	1.1258	1.11641	1.12829	0.529571	0.191181	0.775714	0.502089	0.610619	0.778354	Ptpn12	Not significant
2223	IMPC_ACS_037_001	% Pre-pulse inhibition - Global	2.88535e-05	1	0.650501	0.484993	40	6	0.725863	0.0833245	0.108917	0.839432	0.209799	0.379872	0.733116	-0.148734	0.221063	-0.839504	0.289591	0.542036	0.614607	0.547005	0.824293	0.504355	1.08121	0.299342	0.306948	0.581579	0.154608	1.68849	0.560088	Pttg1	Not significant
2224	IMPC_ACS_037_001	% Pre-pulse inhibition - Global	3.59586e-05	1	0.674675	0.554459	40	6	0.321366	0.153448	0.284983	0.911268	0.361053	0.937495	0.334859	0.418688	0.919643	0.070596	0.139195	0.76678	0.985589	0.831471	1.17395	1.15808	1.1867	0.305224	0.312836	0.632132	0.347182	1.00902	0.709635	Rock1	Not significant
2225	IMPC_ACS_037_001	% Pre-pulse inhibition - Global	0.000215192	0.998267	0.689761	0.820385	39	6	0.0310087	0.324105	0.0992287	0.119006	0.587302	0.443742	0.0360495	-0.849941	0.112499	-1.11879	0.157982	-0.58631	0.389631	0.62315	0.587325	0.447496	0.699216	0.494888	0.203652	0.79857	0.251088	0.736136	0.612143	Sra1	Genotype effect with no sex effect(real)
2226	IMPC_ACS_037_001	% Pre-pulse inhibition - Global	4.94861e-05	0.998267	0.824025	0.702192	39	6	0.484682	0.765404	0.419036	0.721974	0.904475	0.793592	0.497055	-0.281739	0.667101	0.30961	0.0402219	-0.879299	0.90439	0.525344	0.929436	1.24191	0.669029	0.441572	0.242282	0.746177	0.0754622	-0.946627	0.337222	Ywhaz	Not significant
18	IMPC_ACS_033_001	% Pre-pulse inhibition - PPI1	6.88581e-08	1	0.958516	0.709792	40	6	0.462981	0.938027	0.821087	0.783751	0.983763	0.910757	0.475381	0.310629	0.941657	0.0533774	0.272914	0.56788	0.986562	0.823938	2.12197	3.19016	1.72016	0.769603	-0.0893377	0.88278	0.723693	0.425165	0.867367	A2m	Not significant
1810	IMPC_ACS_033_001	% Pre-pulse inhibition - PPI1	7.82801e-08	1	0.879051	0.999598	40	6	0.976414	0.434215	0.604069	0.992265	0.75264	0.939662	0.977063	-0.0125493	0.548523	0.453431	0.302974	-0.47853	0.899711	0.743946	1.30089	4.25992	0.187785	0.744253	-0.101278	0.885537	0.33899	-1.03324	0.801947	Ahcy	Not significant
1812	IMPC_ACS_033_001	% Pre-pulse inhibition - PPI1	1.244e-07	1	0.977493	0.995927	40	6	0.450704	0.31078	0.230306	0.650947	0.613886	0.536589	0.463261	-0.319166	0.624253	0.35584	0.0401287	-0.994171	0.750982	0.356699	-1.26531	4.54144	-3.44963	0.719353	-0.112093	0.878686	0.105158	-1.4621	0.529934	Atp5b	Not significant
1814	IMPC_ACS_033_001	% Pre-pulse inhibition - PPI1	5.76207e-08	1	0.959299	0.997955	40	6	0.225432	0.997361	0.489234	0.380417	1	0.712947	0.238452	-0.510464	0.222672	-0.916436	0.824684	-0.104493	0.414129	0.916855	0.430952	-0.618898	0.825873	0.744378	-0.10496	0.871374	0.309364	0.706983	0.663628	Atp6v0d1	Not significant
1816	IMPC_ACS_033_001	% Pre-pulse inhibition - PPI1	2.39306e-07	1	0.834141	0.538949	40	6	0.622388	0.83972	0.405837	0.786396	0.934688	0.726232	0.631998	-0.208763	0.241273	-0.88477	0.311085	0.467244	0.562458	0.556363	-0.411832	-5.59964	1.53966	0.702739	-0.118537	0.888855	0.226575	1.23348	0.665338	C8a	Not significant
1818	IMPC_ACS_033_001	% Pre-pulse inhibition - PPI1	7.56236e-08	1	0.806834	0.610788	40	6	0.736202	0.718289	0.968314	0.826446	0.90849	0.981142	0.743202	0.14291	0.805256	0.186749	0.836775	0.099071	0.950231	0.921512	1.60209	3.34542	0.9463	0.766865	-0.0916308	0.91225	0.878098	-0.179309	0.958461	Cdk4	Not significant
1820	IMPC_ACS_033_001	% Pre-pulse inhibition - PPI1	1.26868e-07	1	0.944999	0.984852	40	6	0.0189971	0.940384	0.125736	0.0585485	0.988751	0.382601	0.0225387	-0.96659	0.1227	-1.15295	0.0824701	-0.780229	0.413546	0.224701	-0.582209	-1.94796	-0.0684548	0.82282	-0.0699975	0.913129	0.584369	0.302724	0.935057	Dhfr	Genotype effect with no sex effect(real)
1829	IMPC_ACS_033_001	% Pre-pulse inhibition - PPI1	5.07366e-08	1	0.707487	0.843502	40	6	0.826207	0.591322	0.918051	0.899539	0.777166	0.938452	0.830916	-0.0931761	0.918524	0.079507	0.549482	-0.265859	0.98784	0.835601	1.35216	3.2493	0.638512	0.732384	-0.108222	0.860776	0.653599	-0.453588	0.716219	Galc	Not significant
1830	IMPC_ACS_033_001	% Pre-pulse inhibition - PPI1	5.5926e-08	1	0.995201	0.936371	40	6	0.719363	0.802069	0.92664	0.854244	0.917536	0.982615	0.726773	0.152409	0.92425	-0.0682948	0.486736	0.373114	0.952266	0.908149	1.32878	2.41599	0.919807	0.681807	-0.129219	0.86976	0.763542	0.312189	0.954782	Gnpda1	Not significant
1840	IMPC_ACS_033_001	% Pre-pulse inhibition - PPI1	1.89738e-08	1	0.974012	0.992263	40	6	0.914134	0.926011	0.662034	0.971505	0.977192	0.907451	0.916489	-0.0457657	0.448351	-0.572689	0.309162	0.481158	0.697869	0.542549	1.53612	1.14346	1.68382	0.735915	-0.110909	0.894341	0.11073	0.942938	0.752066	Idh1	Not significant
1850	IMPC_ACS_033_001	% Pre-pulse inhibition - PPI1	1.57978e-08	1	0.937078	0.72565	40	6	0.595473	0.787621	0.881025	0.77753	0.88531	0.91249	0.605637	0.225016	0.988464	-0.0106624	0.364448	0.460694	0.988464	0.686299	2.04251	3.2447	1.59029	0.674763	-0.138475	0.867567	0.583505	0.332881	0.811064	Iqgap1	Not significant
1860	IMPC_ACS_033_001	% Pre-pulse inhibition - PPI1	1.26189e-08	1	0.976836	0.97491	40	6	0.576998	0.786548	0.822314	0.705068	0.916187	0.870936	0.587525	0.236359	0.926022	-0.0698961	0.260952	0.542615	0.97697	0.441134	2.09591	2.93351	1.78083	0.637617	-0.157284	0.923894	0.253499	0.455226	0.579881	Lmbrd1	Not significant
1870	IMPC_ACS_033_001	% Pre-pulse inhibition - PPI1	1.23649e-07	1	0.939362	0.996954	40	6	0.12644	0.557146	0.375203	0.426368	0.727804	0.755618	0.137209	-0.640566	0.614192	-0.377186	0.0530547	-0.903945	0.816667	0.512862	-0.098582	1.2889	-0.620513	0.754219	-0.0988302	0.865497	0.432837	-0.625589	0.721396	Mfap4	Not significant
1880	IMPC_ACS_033_001	% Pre-pulse inhibition - PPI1	6.55e-08	1	0.984044	0.999976	40	6	0.680085	0.742033	0.956165	0.799343	0.855321	0.959242	0.68842	-0.174868	0.728007	-0.261086	0.856696	-0.0886497	0.866326	0.980508	0.964069	1.90678	0.60945	0.713239	-0.116546	0.851285	0.955406	0.0558899	0.984958	Mmachc	Not significant
1890	IMPC_ACS_033_001	% Pre-pulse inhibition - PPI1	1.65175e-08	1	0.829354	0.978074	40	6	0.130497	0.442666	0.316355	0.312402	0.692487	0.561618	0.141409	0.633966	0.201277	0.958776	0.499924	0.309155	0.489259	0.707175	2.93611	6.50276	1.59445	0.678479	-0.134056	0.865381	0.114964	-0.783678	0.304876	Mvk	Not significant
18100	IMPC_ACS_033_001	% Pre-pulse inhibition - PPI1	7.70387e-08	1	0.975149	0.879374	40	6	0.337842	0.997846	0.593649	0.703769	0.997846	0.893599	0.3513	-0.404806	0.270337	-0.818693	0.985215	0.00908119	0.715891	0.985215	0.376641	-0.829858	0.83049	0.734808	-0.107199	0.869281	0.426846	0.720575	0.764081	Nek2	Not significant
18101	IMPC_ACS_033_001	% Pre-pulse inhibition - PPI1	6.48096e-08	1	0.954973	0.982739	40	6	0.0728701	0.0715643	0.138285	0.255684	0.200636	0.680203	0.639776	-0.204022	0.132214	-1.12339	0.11197	0.715341	0.528855	0.447502	0.977896	-1.92863	2.07125	0.770762	-0.0921016	0.917869	0.0114851	1.74662	0.110098	Npc2	Not significant
18102	IMPC_ACS_033_001	% Pre-pulse inhibition - PPI1	1.73358e-08	1	0.852406	0.980158	40	6	0.923267	0.552961	0.91627	0.946544	0.675337	0.965757	0.925373	0.0408826	0.788858	0.204778	0.791278	-0.123012	0.958438	0.924213	1.51489	3.59775	0.731385	0.701114	-0.126558	0.819002	0.482151	-0.454348	0.704319	Pebp1	Not significant
18103	IMPC_ACS_033_001	% Pre-pulse inhibition - PPI1	3.68158e-08	1	0.94366	0.845917	40	6	0.532496	0.967666	0.530617	0.769747	0.976459	0.869744	0.543835	0.264394	0.693209	-0.299536	0.0722816	0.828324	0.92677	0.422125	1.94229	1.38825	2.15071	0.668499	-0.135523	0.838	0.277342	0.992337	0.742775	Phyh	Not significant
18104	IMPC_ACS_033_001	% Pre-pulse inhibition - PPI1	3.83764e-07	1	0.982227	0.999402	40	6	0.0333111	0.69102	0.191745	0.0854986	0.879103	0.388536	0.0384677	-0.881615	0.274598	-0.80375	0.0431484	-0.95948	0.568535	0.130291	-3.46103	-3.9887	-3.26253	0.762612	-0.0932295	0.918885	0.754747	-0.24896	0.918713	Pipox	Genotype effect with no sex effect(real)
18105	IMPC_ACS_033_001	% Pre-pulse inhibition - PPI1	7.0347e-08	1	0.956216	0.975282	40	6	0.237825	0.46049	0.433623	0.318444	0.706383	0.580585	0.250981	-0.497291	0.85838	-0.13089	0.078901	-0.863692	0.96734	0.182006	0.052844	2.51304	-0.872608	0.724498	-0.114805	0.859967	0.108558	-0.847607	0.875875	Plk1	Not significant
18106	IMPC_ACS_033_001	% Pre-pulse inhibition - PPI1	9.31672e-08	1	0.875273	0.998359	40	6	0.740085	0.405671	0.597688	0.896569	0.596756	0.829605	0.746989	-0.14073	0.699286	0.293367	0.20885	-0.574827	0.859778	0.488766	1.08061	4.0321	-0.0296525	0.692337	-0.123609	0.866926	0.337834	-0.991802	0.628557	Pmm2	Not significant
18107	IMPC_ACS_033_001	% Pre-pulse inhibition - PPI1	1.79863e-07	1	0.923418	0.687608	40	6	0.411173	0.852591	0.847976	0.668297	0.919316	0.952735	0.424163	0.347566	0.771497	0.217273	0.330595	0.47786	0.911042	0.941587	1.7903	2.36726	1.57327	0.770058	-0.087105	0.902309	0.895488	0.173483	0.911351	Ptpn12	Not significant
18108	IMPC_ACS_033_001	% Pre-pulse inhibition - PPI1	5.95622e-08	1	0.971843	0.846858	40	6	0.511789	0.999131	0.68334	0.696173	1	0.831256	0.523473	-0.277825	0.339132	-0.711309	0.751452	0.155659	0.727287	0.885366	-0.437069	-4.21364	0.983563	0.722236	-0.112772	0.879653	0.417182	0.754196	0.735876	Pttg1	Not significant
18109	IMPC_ACS_033_001	% Pre-pulse inhibition - PPI1	8.28351e-08	1	0.673567	0.468885	40	6	0.113028	0.803889	0.196946	0.611292	0.897683	0.937495	0.123279	0.663592	0.919137	0.0720068	0.0145019	1.25518	0.985589	0.257811	2.77546	3.06444	2.66676	0.779433	-0.0833546	0.883472	0.328594	1.09982	0.709635	Rock1	Not significant
18128	IMPC_ACS_033_001	% Pre-pulse inhibition - PPI1	4.11161e-08	1	0.493809	0.290814	40	6	0.0138102	0.939121	0.0817123	0.0982058	0.985222	0.567149	0.0166407	1.01161	0.310979	0.694364	0.0122182	1.32885	0.594109	0.139931	3.34085	5.44238	2.55031	0.726471	-0.104595	0.894119	0.546908	0.529894	0.732482	Ulk3	Genotype effect with no sex effect(real)
18130	IMPC_ACS_033_001	% Pre-pulse inhibition - PPI1	1.00023e-07	1	0.84534	0.883314	40	6	0.320523	0.525652	0.597764	0.587626	0.74424	0.818252	0.334018	-0.41941	0.864465	-0.130146	0.119338	-0.708674	0.947531	0.550493	0.405086	2.28138	-0.300719	0.735728	-0.105596	0.870681	0.48938	-0.684124	0.752487	Ywhaz	Not significant
19	IMPC_ACS_034_001	% Pre-pulse inhibition - PPI2	0.000190326	1	0.940458	0.977834	40	6	0.698983	0.0231378	0.145277	0.901576	0.0877086	0.584296	0.706879	-0.164006	0.699903	-0.266901	0.900992	-0.061112	0.899492	0.95988	0.967534	1.0143	0.935042	0.0517316	0.604711	0.237357	0.377867	0.8105	0.615923	A2m	Not significant
1910	IMPC_ACS_034_001	% Pre-pulse inhibition - PPI2	0.000142552	1	0.874036	0.933704	40	6	0.357713	0.0519413	0.38539	0.669612	0.185359	0.903226	0.39082	-0.372977	0.972799	-0.024023	0.136646	-0.721932	0.992161	0.672153	0.908324	1.12037	0.760991	0.0502579	0.63551	0.219878	0.882006	-0.0623983	0.987293	Ahcy	Not significant
1912	IMPC_ACS_034_001	% Pre-pulse inhibition - PPI2	0.000286871	1	0.917073	0.853448	40	6	0.00338735	0.036847	0.00533287	0.0602195	0.143793	0.170652	0.0163247	-1.01438	0.812311	-0.156887	0.000197637	-1.87188	0.896343	0.00632439	0.310846	0.996862	-0.165808	0.0620811	0.550369	0.279448	0.0913634	-1.16462	0.529934	Atp5b	One sex_Male only
1914	IMPC_ACS_034_001	% Pre-pulse inhibition - PPI2	0.00010307	1	0.860496	0.973406	40	6	0.0023469	0.0396368	0.937327	0.0211221	0.137732	0.991477	0.00308673	-1.22909	0.0718606	-1.20027	0.00849895	-1.25791	0.233325	0.089239	0.221751	-0.0247909	0.393052	0.0653285	0.527464	0.252974	0.53592	0.469818	0.79132	Atp6v0d1	Genotype effect with no sex effect(real)
1916	IMPC_ACS_034_001	% Pre-pulse inhibition - PPI2	0.000188475	1	0.941319	0.924695	40	6	0.0435046	0.0576774	0.044104	0.140265	0.170938	0.329898	0.049605	-0.838298	0.300734	-0.737595	0.0374614	-0.939001	0.63188	0.336273	0.463413	0.247628	0.613343	0.0633235	0.558507	0.230945	0.679587	0.357101	0.916795	C8a	One sex_Male only
1918	IMPC_ACS_034_001	% Pre-pulse inhibition - PPI2	0.000161957	1	0.91508	0.994146	40	6	0.100192	0.0576517	0.119698	0.232446	0.179132	0.638678	0.723253	0.154453	0.150756	1.01708	0.154691	-0.708173	0.391515	0.505075	1.0744	1.63502	0.684867	0.0764648	0.541012	0.263725	0.245514	-1.18424	0.628227	Cdk4	Not significant
1920	IMPC_ACS_034_001	% Pre-pulse inhibition - PPI2	0.0011824	1	0.767634	0.999787	40	6	0.0189321	0.0306684	0.849996	0.0585485	0.10483	0.923695	0.0305482	-0.919206	0.147425	-0.991061	0.0706936	-0.847351	0.419042	0.20137	0.567741	0.419019	0.671076	0.054128	0.583839	0.201047	0.258589	0.727548	0.935057	Dhfr	Genotype effect with no sex effect(real)
1928	IMPC_ACS_034_001	% Pre-pulse inhibition - PPI2	0.000272437	1	0.77544	0.99102	40	6	0.216913	0.0204575	0.0631444	0.387489	0.0688116	0.6782	0.229823	-0.519813	0.32333	-0.696539	0.450789	-0.343087	0.649556	0.722144	0.784953	0.574903	0.930898	0.0560613	0.597701	0.188281	0.170705	0.951152	0.655312	G6pd2	Not significant
1930	IMPC_ACS_034_001	% Pre-pulse inhibition - PPI2	0.000135598	1	0.956274	0.954655	40	6	0.52134	0.0950818	0.120211	0.67554	0.227209	0.345606	0.545211	-0.263495	0.608556	0.365285	0.0621196	-0.892276	0.807027	0.369241	0.935019	1.29239	0.686714	0.0476245	0.634124	0.180474	0.319394	-0.623438	0.456633	Galc	Not significant
1940	IMPC_ACS_034_001	% Pre-pulse inhibition - PPI2	0.000519662	1	0.882644	0.994655	40	6	0.449747	0.0230511	0.101789	0.746668	0.119446	0.738048	0.462316	-0.319836	0.396957	-0.573385	0.895784	-0.066288	0.764197	0.974611	0.862487	0.802086	0.904455	0.0586225	0.565788	0.250907	0.335736	1.07288	0.794844	Gnpda1	Not significant
1950	IMPC_ACS_034_001	% Pre-pulse inhibition - PPI2	0.000349007	1	0.914566	0.885984	40	6	0.156216	0.0596558	0.0994898	0.295778	0.18734	0.669368	0.16792	-0.595345	0.668453	-0.302923	0.0618296	-0.887768	0.861802	0.226568	0.798043	0.980747	0.671097	0.0540074	0.604526	0.196902	0.977636	0.0196812	0.99943	Idh1	Not significant
1960	IMPC_ACS_034_001	% Pre-pulse inhibition - PPI2	0.000310228	1	0.825387	0.976894	40	6	0.124825	0.0542774	0.511065	0.361994	0.171092	0.748529	0.152064	-0.617853	0.605208	-0.357294	0.0762907	-0.878413	0.881718	0.356844	0.771027	0.878304	0.696489	0.053372	0.60734	0.186802	0.895866	0.0862203	0.938004	Iqgap1	Not significant
1970	IMPC_ACS_034_001	% Pre-pulse inhibition - PPI2	6.58073e-05	1	0.804137	0.969859	40	6	0.92471	0.0269062	0.176288	0.940063	0.131747	0.39114	0.926776	0.0401116	0.96321	-0.032588	0.812929	0.112811	0.97697	0.923488	1.09573	1.16641	1.04661	0.061624	0.597242	0.273456	0.296077	0.742641	0.621584	Lmbrd1	Not significant
1980	IMPC_ACS_034_001	% Pre-pulse inhibition - PPI2	0.000550485	1	0.962418	0.898263	40	6	0.0921311	0.082635	0.0692399	0.387687	0.206587	0.493825	0.101431	-0.704037	0.671941	-0.301474	0.0174595	-1.1066	0.816667	0.281291	0.695365	0.90039	0.552911	0.056181	0.593222	0.191837	0.763864	-0.211905	0.862788	Mfap4	Not significant
1989	IMPC_ACS_034_001	% Pre-pulse inhibition - PPI2	0.000108364	1	0.895528	0.999898	40	6	0.738202	0.0469658	0.222288	0.839107	0.13492	0.470891	0.745153	-0.141787	0.902332	0.0882358	0.429313	-0.371809	0.960729	0.678314	0.980998	1.14891	0.864328	0.0552829	0.616024	0.201388	0.8183	0.155978	0.960818	Mvk	Not significant
1990	IMPC_ACS_034_001	% Pre-pulse inhibition - PPI2	0.000204963	1	0.901476	0.917069	40	6	0.242686	0.0637466	0.262787	0.614892	0.182315	0.70903	0.273996	-0.474201	0.97035	-0.0260989	0.0574589	-0.922302	0.984113	0.547775	0.833064	1.09874	0.648468	0.0475632	0.637204	0.186176	0.578804	-0.258999	0.795855	Nek2	Not significant
19100	IMPC_ACS_034_001	% Pre-pulse inhibition - PPI2	4.61116e-06	1	0.844202	0.998871	40	6	0.176657	0.0271519	0.0707687	0.469007	0.0834919	0.514882	0.188859	-0.567867	0.317309	-0.704228	0.351162	-0.431507	0.722943	0.812738	0.642158	0.286279	0.889428	0.0596061	0.579698	0.203533	0.310628	0.852419	0.742775	Phyh	Not significant
19101	IMPC_ACS_034_001	% Pre-pulse inhibition - PPI2	0.000748436	1	0.972307	0.983295	40	6	0.0618328	0.15855	0.0399818	0.132253	0.380778	0.162945	0.0693454	-0.777905	0.845488	-0.134138	0.00424413	-1.42167	0.932597	0.0435731	0.664941	1.02768	0.412907	0.0620585	0.566741	0.233913	0.370712	-0.720792	0.802222	Pipox	Interaction_One sex_Male only2
19102	IMPC_ACS_034_001	% Pre-pulse inhibition - PPI2	0.000331426	1	0.831641	0.92887	40	6	0.118095	0.0692043	0.348292	0.187241	0.198805	0.513923	0.142949	-0.631583	0.707541	-0.259347	0.0435498	-1.00382	0.894332	0.134919	0.775613	0.950778	0.653906	0.0554609	0.607438	0.172042	0.799478	-0.137034	0.998034	Plk1	Not significant
19103	IMPC_ACS_034_001	% Pre-pulse inhibition - PPI2	5.2696e-05	1	0.921262	0.991015	40	6	0.0849689	0.053815	0.0948878	0.300014	0.134538	0.490799	0.48034	-0.307169	0.444007	0.542626	0.0180486	-1.15696	0.789934	0.169206	0.741316	1.38441	0.294486	0.0593537	0.562123	0.198766	0.314205	-1.13747	0.623207	Pmm2	Not significant
19104	IMPC_ACS_034_001	% Pre-pulse inhibition - PPI2	7.93461e-05	1	0.876305	0.999001	40	6	0.834684	0.0380897	0.635673	0.940917	0.118078	0.871507	0.846426	-0.0845198	0.88058	0.107066	0.561513	-0.276106	0.947673	0.941587	1.02836	1.16889	0.930725	0.0524894	0.629325	0.192767	0.657887	0.246152	0.836115	Ptpn12	Not significant
19105	IMPC_ACS_034_001	% Pre-pulse inhibition - PPI2	5.38693e-05	1	0.70659	0.978636	40	6	0.507962	0.0215427	0.105149	0.911268	0.0765964	0.885466	0.519707	0.280337	0.953386	0.0408238	0.274386	0.51985	0.985589	0.831471	1.17579	1.18777	1.16748	0.0714542	0.576208	0.237167	0.0737611	1.05523	0.404414	Rock1	Not significant
20	IMPC_ACS_035_001	% Pre-pulse inhibition - PPI3	2.78359e-05	1	0.948028	0.607587	40	6	0.971612	0.264335	0.509029	0.977609	0.512935	0.838098	0.972393	0.0151056	0.574904	-0.415762	0.350369	0.445973	0.891625	0.836609	1.02174	0.940018	1.08987	0.523657	0.204582	0.801358	0.189001	1.06632	0.466776	A2m	Not significant
206	IMPC_ACS_035_001	% Pre-pulse inhibition - PPI3	7.45611e-05	1	0.936418	0.920895	40	6	0.385025	0.412864	0.693774	0.669612	0.748945	0.959047	0.398237	-0.367219	0.582635	-0.416752	0.493044	-0.317686	0.899711	0.841098	0.982509	1.03687	0.937196	0.504158	0.220347	0.800123	0.534766	0.319413	0.893983	Ahcy	Not significant
207	IMPC_ACS_035_001	% Pre-pulse inhibition - PPI3	6.28401e-05	1	0.974366	1	40	6	0.0736661	0.921024	0.165735	0.269516	0.950734	0.519952	0.0819446	-0.74623	0.801869	-0.190706	0.00248311	-1.30175	0.896343	0.0496622	0.606524	0.862977	0.392746	0.550806	0.173264	0.842733	0.441097	-0.937783	0.717601	Atp5b	Not significant
208	IMPC_ACS_035_001	% Pre-pulse inhibition - PPI3	0.000134162	1	0.852462	0.971909	40	6	0.019101	0.488849	0.108992	0.0859547	0.734531	0.574304	0.022656	-0.965801	0.215262	-0.906822	0.0279579	-1.02478	0.414129	0.193756	0.669704	0.70936	0.636648	0.494005	0.21276	0.745045	0.872513	0.0948017	0.95875	Atp6v0d1	Genotype effect with no sex effect(real)
209	IMPC_ACS_035_001	% Pre-pulse inhibition - PPI3	2.3843e-05	1	0.92436	0.941034	40	6	0.00289088	0.421672	0.517355	0.060066	0.688752	0.799549	0.00376285	-1.20593	0.046162	-1.45316	0.0283327	-0.958698	0.327136	0.336273	0.514225	0.362707	0.640529	0.623938	0.143381	0.831213	0.408266	0.637847	0.829991	C8a	Genotype effect with no sex effect(real)
2010	IMPC_ACS_035_001	% Pre-pulse inhibition - PPI3	4.42478e-05	1	0.900516	0.729496	39	6	0.492022	0.840159	0.464168	0.643698	0.919419	0.896279	0.504284	0.282955	0.250676	0.862412	0.468671	-0.298979	0.525512	0.691091	1.08134	1.37626	0.827975	0.756599	0.0966402	0.91225	0.215817	-1.06475	0.613862	Cdk4	Not significant
2014	IMPC_ACS_035_001	% Pre-pulse inhibition - PPI3	0.00025615	1	0.883651	0.79268	40	6	0.0978561	0.363998	0.296097	0.180362	0.627375	0.568024	0.107436	-0.692306	0.285843	-0.808931	0.192512	-0.575681	0.54191	0.389164	0.785979	0.743445	0.821434	0.477946	0.227957	0.743472	0.402601	0.461206	0.935057	Dhfr	Not significant
2016	IMPC_ACS_035_001	% Pre-pulse inhibition - PPI3	4.58464e-05	1	0.977842	0.989131	40	6	0.459814	0.599329	0.776888	0.830103	0.795748	0.916032	0.472255	-0.312819	0.902257	-0.0925008	0.265208	-0.533138	0.945701	0.966309	0.957202	1.13386	0.809943	0.527551	0.207455	0.827879	0.706418	-0.233182	0.848965	Dync1li1	Not significant
2018	IMPC_ACS_035_001	% Pre-pulse inhibition - PPI3	5.69372e-05	1	0.796784	0.919976	40	6	0.240893	0.261453	0.301262	0.401488	0.49356	0.893578	0.254079	-0.494103	0.235438	-0.899964	0.83994	-0.0882413	0.549412	0.92843	0.912869	0.791778	1.01381	0.512844	0.212998	0.780225	0.0190576	1.02472	0.251832	G6pd2	Not significant
2020	IMPC_ACS_035_001	% Pre-pulse inhibition - PPI3	2.08682e-05	1	0.847444	0.722015	40	6	0.918149	0.71408	0.876526	0.954459	0.853434	0.921605	0.920394	-0.0436187	0.728777	0.267192	0.436412	-0.35443	0.869315	0.809199	1.08037	1.2343	0.952055	0.574492	0.185756	0.813127	0.461498	-0.435866	0.593883	Galc	Not significant
2028	IMPC_ACS_035_001	% Pre-pulse inhibition - PPI3	3.36284e-05	1	0.994272	0.975388	40	6	0.826375	0.408671	0.791056	0.935829	0.685124	0.907413	0.83108	0.0930845	0.846084	-0.141226	0.524018	0.327395	0.933421	0.92272	0.969827	1.02851	0.920907	0.571756	0.174228	0.833906	0.579081	0.64285	0.901668	Gnpda1	Not significant
2030	IMPC_ACS_035_001	% Pre-pulse inhibition - PPI3	0.000133485	1	0.972529	0.929661	40	6	0.517273	0.336779	0.66212	0.7282	0.542588	0.830017	0.528867	-0.274243	0.522931	-0.477807	0.882112	-0.0706779	0.881718	0.940487	0.958504	0.992608	0.930075	0.496404	0.220153	0.738447	0.404621	0.627282	0.690237	Iqgap1	Not significant
2039	IMPC_ACS_035_001	% Pre-pulse inhibition - PPI3	3.0428e-05	1	0.782449	0.735551	40	6	0.884899	0.790027	0.715791	0.998392	0.867833	0.872183	0.888045	0.0614402	0.4898	0.535019	0.351574	-0.412139	0.816334	0.822934	1.08497	1.26945	0.931183	0.538084	0.199643	0.73074	0.331823	-0.747515	0.641525	Mfap4	Not significant
2040	IMPC_ACS_035_001	% Pre-pulse inhibition - PPI3	5.85782e-05	1	0.864227	0.577027	40	6	0.359622	0.593825	0.718596	0.624171	0.766066	0.840688	0.372993	-0.387084	0.802348	-0.192615	0.195608	-0.581554	0.904138	0.634082	0.926254	1.00489	0.860707	0.533542	0.202971	0.740049	0.780887	-0.185968	0.914061	Mmachc	Not significant
2050	IMPC_ACS_035_001	% Pre-pulse inhibition - PPI3	4.12375e-05	1	0.819574	0.525322	40	6	0.490339	0.667463	0.769566	0.770532	0.808483	0.905941	0.502354	-0.292032	0.995661	-0.00420914	0.192232	-0.579854	0.995661	0.894427	0.962728	1.03778	0.900166	0.539471	0.197796	0.807006	0.642925	-0.377849	0.826672	Nek2	Not significant
2060	IMPC_ACS_035_001	% Pre-pulse inhibition - PPI3	0.000150713	1	0.884201	0.91913	40	6	0.297032	0.272143	0.412733	0.461726	0.481517	0.791626	0.310521	-0.440042	0.325732	-0.744267	0.76122	-0.135818	0.773613	0.906164	0.910619	0.825416	0.981644	0.47282	0.232557	0.708954	0.172691	0.841006	0.632558	Npc2	Not significant
2065	IMPC_ACS_035_001	% Pre-pulse inhibition - PPI3	7.86491e-05	1	0.948486	0.783248	40	6	0.497525	0.652483	0.707516	0.696507	0.753644	0.849505	0.509432	-0.287237	0.926152	0.0705436	0.164268	-0.645018	0.958438	0.396473	0.966396	1.15412	0.809913	0.499	0.221941	0.687301	0.416216	-0.493621	0.632818	Pebp1	Not significant
2066	IMPC_ACS_035_001	% Pre-pulse inhibition - PPI3	9.13717e-05	1	0.911759	0.663682	40	6	0.267796	0.47056	0.612186	0.574973	0.729741	0.869744	0.281182	-0.467256	0.623519	-0.37434	0.21765	-0.560172	0.92677	0.69351	0.942192	0.987049	0.9048	0.48505	0.229958	0.779636	0.924643	0.0441254	0.957967	Phyh	Not significant
2067	IMPC_ACS_035_001	% Pre-pulse inhibition - PPI3	0.000395247	1	0.979978	0.992691	40	6	0.0753362	0.600613	0.246638	0.14516	0.784254	0.442827	0.0837153	-0.742091	0.589593	-0.40509	0.0173643	-1.07909	0.839241	0.090219	0.78145	0.950634	0.64042	0.461273	0.237369	0.704159	0.315646	-0.436634	0.998034	Plk1	Not significant
2068	IMPC_ACS_035_001	% Pre-pulse inhibition - PPI3	4.00624e-06	1	0.656247	0.785879	40	6	0.0608512	0.0590155	0.123186	0.240202	0.14512	0.504742	0.743525	-0.142724	0.248039	0.819461	0.028466	-1.10491	0.704694	0.203329	0.91296	1.39065	0.514762	0.669776	0.131699	0.866926	0.0488503	-1.79267	0.215516	Pmm2	Not significant
2069	IMPC_ACS_035_001	% Pre-pulse inhibition - PPI3	3.53787e-05	1	0.978531	0.751546	40	6	0.552987	0.201337	0.273878	0.760553	0.397713	0.628904	0.563964	0.251353	0.666696	-0.313853	0.0886348	0.816559	0.835053	0.810278	1.10837	1.06314	1.14608	0.497472	0.214656	0.773915	0.101957	1.34507	0.374231	Ptpn12	Not significant
2070	IMPC_ACS_035_001	% Pre-pulse inhibition - PPI3	5.98599e-05	1	0.952268	0.858249	40	6	0.88088	0.547562	0.934229	0.965708	0.777723	0.95208	0.884135	-0.0636008	0.973269	0.0255205	0.745491	-0.152722	0.985589	0.911881	1.01883	1.12061	0.93399	0.5518	0.194861	0.768579	0.981804	0.0166185	0.981806	Rock1	Not significant
2076	IMPC_ACS_035_001	% Pre-pulse inhibition - PPI3	5.09162e-05	1	0.879512	0.650227	40	6	0.682478	0.869128	0.52584	0.863455	0.970979	0.793592	0.690758	-0.173486	0.578552	0.424356	0.0884443	-0.771328	0.889567	0.546293	1.00295	1.27327	0.777614	0.533287	0.20306	0.78889	0.123211	-0.992624	0.429736	Ywhaz	Not significant
21	IMPC_ACS_036_001	% Pre-pulse inhibition - PPI4	0.11963	0.998267	0.411148	0.95966	39	6	0.380445	0.0934476	0.265339	0.747139	0.26262	0.776	0.393991	-0.353069	0.375783	-0.571668	0.776917	-0.144706	0.890249	0.93848	0.965884	0.921803	1.0057	0.199283	0.399226	0.545407	0.160277	0.826188	0.412467	A2m	Not significant
211	IMPC_ACS_036_001	% Pre-pulse inhibition - PPI4	0.109861	0.999515	0.576557	0.999991	38	6	0.924909	0.0442775	0.20326	0.98812	0.175526	0.86021	0.927065	-0.0372	0.609036	-0.325136	0.630743	0.22661	0.899711	0.841098	0.988432	0.951034	1.01898	0.121326	0.458397	0.408309	0.258092	1.01014	0.769079	Ahcy	Not significant
212	IMPC_ACS_036_001	% Pre-pulse inhibition - PPI4	2.34626e-06	1	0.902705	0.844621	38	6	0.00509771	0.361222	0.0109214	0.0679695	0.613899	0.249632	0.00652022	-1.1115	0.371393	-0.573807	0.000884842	-1.67144	0.560593	0.020225	0.631172	0.74307	0.5253	0.124279	0.42283	0.432153	0.530469	-0.674807	0.793225	Atp5b	One sex_Male only
213	IMPC_ACS_036_001	% Pre-pulse inhibition - PPI4	0.00205039	0.998267	0.489648	0.973527	39	6	0.0019097	0.0747374	0.466607	0.0189964	0.210826	0.699911	0.00255377	-1.19057	0.0164467	-1.44978	0.0595912	-0.940718	0.127446	0.341295	0.711744	0.592443	0.822527	0.187087	0.364642	0.486427	0.195577	0.873702	0.577696	Atp6v0d1	Genotype effect with no sex effect(real)
214	IMPC_ACS_036_001	% Pre-pulse inhibition - PPI4	0.00327127	0.998267	0.716471	0.992862	39	6	0.0568059	0.127908	0.0870415	0.163426	0.327654	0.437776	0.0641305	-0.754796	0.124034	-0.986786	0.287339	-0.53196	0.408765	0.523972	0.831122	0.726654	0.927799	0.217353	0.357038	0.511742	0.369357	0.811864	0.813464	C8a	Not significant
215	IMPC_ACS_036_001	% Pre-pulse inhibition - PPI4	0.0798873	0.999968	0.901698	0.983022	37	6	0.473957	0.403317	0.342335	0.624762	0.688011	0.797304	0.487081	0.273077	0.209459	0.804961	0.519781	-0.288765	0.478405	0.723723	1.04171	1.1297	0.953955	0.210851	0.369479	0.516433	0.365596	-0.724246	0.766844	Cdk4	Not significant
216	IMPC_ACS_036_001	% Pre-pulse inhibition - PPI4	0.000920757	0.998267	0.569647	0.987683	39	6	0.00103677	0.0857758	0.382489	0.00696114	0.220902	0.630771	0.00143055	-1.25069	0.00884558	-1.55684	0.0593962	-0.953048	0.127102	0.183057	0.670184	0.549254	0.782561	0.221575	0.331799	0.537688	0.184665	0.935594	0.848258	Dhfr	Genotype effect with no sex effect(real)
217	IMPC_ACS_036_001	% Pre-pulse inhibition - PPI4	0.0502352	0.999827	0.596791	0.932551	38	6	0.644771	0.109952	0.396868	0.885602	0.28954	0.771444	0.654322	-0.183101	0.944287	-0.0430541	0.514159	-0.348122	0.977126	0.982945	0.959098	1.006	0.911923	0.101606	0.474528	0.351003	0.878471	0.16946	0.948086	Dync1li1	Not significant
218	IMPC_ACS_036_001	% Pre-pulse inhibition - PPI4	5.56379e-05	0.998267	0.430437	0.993626	39	6	0.818631	0.0852624	0.167505	0.897859	0.225336	0.893578	0.823649	-0.0926754	0.330264	-0.648064	0.336002	0.454535	0.649556	0.655139	0.87807	0.666568	1.07508	0.263087	0.31893	0.574014	0.221195	1.42153	0.709782	G6pd2	Not significant
219	IMPC_ACS_036_001	% Pre-pulse inhibition - PPI4	0.071053	1	0.503968	0.984669	36	6	0.276761	0.200817	0.192692	0.475925	0.41056	0.454555	0.291509	0.408975	0.179371	0.891813	0.717949	-0.126481	0.38377	0.893794	1.05702	1.13049	0.979951	0.101117	0.47357	0.305009	0.531622	-0.544723	0.631733	Galc	Not significant
2110	IMPC_ACS_036_001	% Pre-pulse inhibition - PPI4	0.000476185	1	0.982476	0.993433	38	6	0.0909278	0.345515	0.0941419	0.198489	0.617383	0.669368	0.100609	-0.68004	0.906347	-0.0794641	0.00570096	-1.30375	0.976992	0.127352	0.826703	0.881407	0.772857	0.117276	0.439512	0.336448	0.518085	-0.784772	0.941683	Idh1	Not significant
2111	IMPC_ACS_036_001	% Pre-pulse inhibition - PPI4	0.278817	0.999515	0.491293	0.948813	38	6	0.136478	0.0675386	0.119133	0.388027	0.181464	0.665748	0.14812	-0.580407	0.35559	-0.586074	0.200135	-0.600839	0.81768	0.513136	0.923435	0.920162	0.922734	0.0992493	0.495875	0.323137	0.430783	0.48111	0.709813	Iqgap1	Not significant
2112	IMPC_ACS_036_001	% Pre-pulse inhibition - PPI4	0.0129098	0.972578	0.859631	0.857581	36	6	0.652187	0.226541	0.310208	0.964971	0.431999	0.733933	0.662021	-0.163634	0.599022	0.307996	0.153076	-0.66006	0.816667	0.785481	0.94684	1.0329	0.863493	0.0780236	0.446329	0.243565	0.671004	-0.521727	0.857264	Mfap4	Not significant
2113	IMPC_ACS_036_001	% Pre-pulse inhibition - PPI4	0.0797685	0.999515	0.570101	0.999793	38	6	0.69347	0.0486923	0.255937	0.799343	0.147051	0.62991	0.701865	0.155437	0.896256	0.0828278	0.673386	0.201467	0.943118	0.891942	1.03708	1.04383	1.02666	0.101274	0.50502	0.277567	0.29899	0.623659	0.713798	Mmachc	Not significant
2114	IMPC_ACS_036_001	% Pre-pulse inhibition - PPI4	0.151742	0.999515	0.785041	0.999923	38	6	0.574965	0.0865794	0.338775	0.81406	0.214165	0.729286	0.58602	-0.220939	0.821107	-0.145794	0.500221	-0.321559	0.950557	0.894427	0.979579	0.995458	0.960968	0.107719	0.484013	0.340065	0.708934	0.308248	0.850893	Nek2	Not significant
2115	IMPC_ACS_036_001	% Pre-pulse inhibition - PPI4	0.113717	0.999515	0.427737	0.997778	38	6	0.745861	0.0304778	0.164021	0.841556	0.0996878	0.680203	0.752935	0.127849	0.871808	-0.10175	0.481819	0.330552	0.953344	0.822235	1.02768	1.01504	1.03521	0.0948753	0.511039	0.306831	0.118323	0.943342	0.540523	Npc2	Not significant
2116	IMPC_ACS_036_001	% Pre-pulse inhibition - PPI4	0.00136386	0.998267	0.814596	0.999659	39	6	0.516314	0.23687	0.554996	0.699371	0.410391	0.780156	0.528187	-0.261776	0.911588	-0.0739845	0.365986	-0.459199	0.958438	0.657892	0.928934	0.896439	0.957941	0.21539	0.375646	0.455753	0.991708	-0.00956856	0.995413	Pebp1	Not significant
2117	IMPC_ACS_036_001	% Pre-pulse inhibition - PPI4	0.146943	0.999827	0.764724	0.965089	38	6	0.0728132	0.109312	0.090503	0.312668	0.265993	0.574497	0.0814357	-0.700497	0.448983	-0.486093	0.0446648	-0.941335	0.819394	0.326053	0.895013	0.917567	0.870578	0.0926718	0.502239	0.276044	0.942906	0.0469974	0.962687	Phyh	Not significant
2118	IMPC_ACS_036_001	% Pre-pulse inhibition - PPI4	0.203558	0.999827	0.514462	0.944055	38	6	0.118507	0.130327	0.143909	0.187241	0.294168	0.334376	0.129476	-0.612229	0.548575	-0.3709	0.0871491	-0.879093	0.795182	0.192668	0.9095	0.957563	0.861452	0.101927	0.485181	0.29794	0.976998	-0.023012	0.998034	Plk1	Not significant
2119	IMPC_ACS_036_001	% Pre-pulse inhibition - PPI4	0.00804551	0.999985	0.507186	0.306258	37	6	0.000953444	0.00178635	0.00301422	0.0143017	0.00687056	0.0722315	0.274791	-0.433056	0.176261	0.818512	9.4728e-05	-1.71187	0.636646	0.0142092	0.872734	1.13429	0.62424	0.211703	0.335988	0.499757	0.0146593	-2.19439	0.150796	Pmm2	One sex_Male only
2120	IMPC_ACS_036_001	% Pre-pulse inhibition - PPI4	0.0908452	0.999515	0.468569	0.999574	38	6	0.761372	0.0397446	0.196833	0.890662	0.120203	0.590099	0.768042	0.119802	0.848805	-0.12164	0.470712	0.335945	0.947673	0.941587	1.02452	1.00526	1.03819	0.113602	0.480676	0.362298	0.177155	0.938261	0.499255	Ptpn12	Not significant
2121	IMPC_ACS_036_001	% Pre-pulse inhibition - PPI4	0.0674715	0.998267	0.775606	0.995436	39	6	0.947167	0.108557	0.4436	0.977721	0.275699	0.937495	0.948652	0.0267885	0.872096	-0.103876	0.778275	0.147163	0.985589	0.911881	1.00547	0.983379	1.0246	0.179452	0.401316	0.440728	0.515267	0.652355	0.84293	Rock1	Not significant
2122	IMPC_ACS_036_001	% Pre-pulse inhibition - PPI4	0.00146897	1	0.872795	0.997089	38	6	0.00105551	0.0314937	0.497054	0.0286547	0.120868	0.834286	0.00146569	-1.26627	0.0159516	-1.51189	0.0220795	-1.04483	0.151009	0.304158	0.72719	0.615083	0.827779	0.0976659	0.459293	0.374826	0.177494	0.926348	0.525085	Sra1	Genotype effect with no sex effect(real)
2123	IMPC_ACS_036_001	% Pre-pulse inhibition - PPI4	0.122751	0.998267	0.708353	0.790727	39	6	0.206172	0.378113	0.172007	0.483321	0.637087	0.731887	0.219219	-0.506563	0.857746	0.110586	0.0404111	-1.13423	0.947531	0.525344	0.942932	1.05248	0.838671	0.180952	0.41036	0.517524	0.178396	-0.834459	0.488893	Ywhaz	Not significant
5	IMPC_ABR_008_001	18kHz-evoked ABR Threshold	0.00014228	0.000644437	0.00461424	0.0256258	16	6	0.0580956	0.378688	0.228153	0.240241	0.637087	0.779988	0.0743158	0.695916	0.0306381	1.10635	0.646426	0.285479	0.211473	0.895909	1.13108	1.19126	1.07577	0.24674	0.497754	0.578422	0.522316	-0.323121	0.774551	Ywhaz	Not significant
6	IMPC_ABR_010_001	24kHz-evoked ABR Threshold	0.00252018	0.0404237	0.21772	0.103342	16	6	0.718894	0.304538	0.751461	0.863455	0.537641	0.880811	0.734664	-0.150375	0.876764	-0.0984144	0.764588	-0.202336	0.947531	0.931114	0.97048	1.0051	0.934246	0.440956	-0.349764	0.746177	0.645822	-0.453686	0.839569	Ywhaz	Not significant
7	IMPC_ABR_012_001	30kHz-evoked ABR Threshold	0.0857641	0.814791	0.873822	0.982641	15	6	0.013267	0.0924211	0.01335	0.0982058	0.303331	0.214913	0.0200385	0.96702	0.165119	0.807668	0.040198	1.17637	0.528381	0.270808	1.2739	1.1854	1.40319	0.0747477	-0.749947	0.28796	0.56523	-0.381247	0.73826	Ulk3	One sex_Male only
3	IMPC_ABR_004_001	6kHz-evoked ABR Threshold	0.0419112	0.0828844	0.0325587	0.0902057	15	6	0.646357	0.831636	0.250752	0.803239	0.93384	0.58889	0.66666	0.182324	0.105173	-0.571118	0.235112	0.912852	0.406661	0.590086	1.04736	0.911152	1.1884	0.423859	-0.343728	0.734203	0.20109	1.14024	0.54765	Ulk3	Not significant
310	IMPC_ABR_004_001	6kHz-evoked ABR Threshold	0.0264046	0.081069	0.411292	0.030678	16	6	0.00865512	0.404457	0.229087	0.10314	0.656361	0.779988	0.0134004	-1.03048	0.00785279	-1.45232	0.360776	-0.608644	0.124548	0.788389	0.806921	0.712822	0.912542	0.263496	-0.496945	0.588748	0.487445	0.346732	0.752487	Ywhaz	Genotype effect with no sex effect(real)
52	IMPC_CBC_013_001	Alanine aminotransferase	2.32984e-09	1	0.994752	0.996387	40	6	0.412911	0.131755	0.3113	0.783751	0.325394	0.781353	0.425885	0.346212	0.328075	0.66281	0.956802	0.0296145	0.848829	0.978995	0.978479	1.13878	0.840053	0.114275	0.508159	0.407731	0.854033	-0.125036	0.923773	A2m	Not significant
521	IMPC_CBC_013_001	Alanine aminotransferase	3.20224e-09	1	0.981598	0.956272	40	6	0.231595	0.0479795	0.131363	0.507835	0.181922	0.86021	0.244686	0.503766	0.589731	0.347031	0.238714	0.6605	0.899711	0.7111	1.02882	0.869035	1.1668	0.109901	0.512606	0.384655	0.11144	0.826075	0.520226	Ahcy	Not significant
522	IMPC_CBC_013_001	Alanine aminotransferase	2.75496e-09	1	0.97968	0.995655	40	6	0.0553538	0.00586404	0.0355349	0.156615	0.0235809	0.335804	0.285298	-0.463252	0.0451108	-1.27002	0.507367	0.343515	0.202844	0.819593	0.792964	0.584645	0.972859	0.12632	0.451247	0.384568	0.0233744	2.06478	0.449558	Atp6v0d1	Interaction_One sex_Female only2
523	IMPC_CBC_013_001	Alanine aminotransferase	2.07889e-09	1	0.998077	0.990615	40	6	0.574095	0.188088	0.309929	0.761388	0.41872	0.677452	0.584678	0.238096	0.270259	0.746193	0.624582	-0.270001	0.594569	0.805959	0.949634	1.15831	0.769433	0.117244	0.505264	0.351733	0.448253	-0.51093	0.871691	C8a	Not significant
524	IMPC_CBC_013_001	Alanine aminotransferase	1.65622e-06	0.997738	0.995175	0.999281	39	6	0.00161784	0.0360364	0.281442	0.0101385	0.120979	0.553516	0.00352889	1.155	0.00634672	1.53552	0.139673	0.790074	0.127102	0.340272	1.72871	2.07819	1.48722	0.0313795	0.608369	0.126913	0.754032	-0.137078	0.937226	Dhfr	Genotype effect with no sex effect(real)
525	IMPC_CBC_013_001	Alanine aminotransferase	6.68956e-10	1	0.996437	0.950391	40	6	0.228173	0.115017	0.229626	0.600856	0.293109	0.625532	0.241225	-0.507394	0.667172	-0.287257	0.187097	-0.72753	0.865571	0.821146	0.702469	0.759185	0.653491	0.114914	0.501911	0.371637	0.929673	0.0616387	0.966614	Dync1li1	Not significant
526	IMPC_CBC_013_001	Alanine aminotransferase	9.06086e-10	1	0.974406	0.993778	40	6	0.0850824	0.0355184	0.0308627	0.220606	0.113291	0.519054	0.0940146	-0.718958	0.077541	-1.14187	0.576014	-0.29605	0.333607	0.826066	0.649868	0.590748	0.700922	0.123988	0.476345	0.350316	0.021059	1.32216	0.255239	G6pd2	Interaction_cannot classify2
527	IMPC_CBC_013_001	Alanine aminotransferase	1.22572e-07	0.997737	0.999054	0.997931	39	6	0.281422	0.0164611	0.734296	0.47946	0.0504807	0.804229	0.336459	0.397596	0.641476	0.278408	0.316345	0.532355	0.825396	0.736805	1.29562	1.5394	1.1278	0.0368686	0.607295	0.150752	0.368954	0.861243	0.507658	Galc	Not significant
528	IMPC_CBC_013_001	Alanine aminotransferase	2.76277e-09	1	0.995987	0.988715	40	6	0.590192	0.0519618	0.231848	0.713814	0.166092	0.669368	0.600461	0.228199	0.941968	0.0479496	0.460528	0.408448	0.996606	0.625483	0.967733	0.870255	1.05191	0.115881	0.497309	0.336448	0.297182	0.857807	0.901619	Idh1	Not significant
529	IMPC_CBC_013_001	Alanine aminotransferase	1.50208e-09	1	0.984726	0.986546	40	6	0.528384	0.0489501	0.218715	0.89088	0.139172	0.661865	0.539793	0.266975	0.847098	0.127211	0.459913	0.406739	0.930524	0.822934	0.906649	0.820212	0.981291	0.111541	0.514706	0.300304	0.166185	0.794234	0.501078	Mfap4	Not significant
5210	IMPC_CBC_013_001	Alanine aminotransferase	3.03669e-09	1	0.984425	0.990664	40	6	0.213592	0.019164	0.0530645	0.411555	0.0658243	0.318261	0.226456	-0.523422	0.0449226	-1.26872	0.673904	0.221879	0.233519	0.8128	0.799186	0.588307	0.981291	0.130378	0.44481	0.369405	0.0458327	1.93541	0.237974	Mvk	Not significant
5211	IMPC_CBC_013_001	Alanine aminotransferase	1.14047e-09	1	0.987052	0.994758	40	6	0.827313	0.0458699	0.246002	0.954079	0.139562	0.69736	0.831994	0.0925529	0.950361	-0.041415	0.677686	0.226521	0.973832	0.894427	0.867623	0.825095	0.904348	0.108198	0.523618	0.340065	0.1244	0.791554	0.483693	Nek2	Not significant
5212	IMPC_CBC_013_001	Alanine aminotransferase	1.85539e-09	1	0.969498	0.974286	40	6	0.577487	0.04329	0.179748	0.731173	0.134542	0.680203	0.588004	0.236017	0.950716	-0.040699	0.348663	0.512733	0.969857	0.727883	0.934928	0.812889	1.04032	0.123295	0.492917	0.367467	0.120499	1.04635	0.540523	Npc2	Not significant
5213	IMPC_CBC_013_001	Alanine aminotransferase	7.19824e-10	1	0.970915	0.999316	40	6	0.417946	0.0277155	0.0829814	0.635448	0.0724492	0.334168	0.43087	-0.342489	0.247899	-0.758987	0.88901	0.0740079	0.824679	0.954378	0.734142	0.692054	0.770487	0.114535	0.504309	0.307302	0.00478892	1.3373	0.0891935	Pebp1	Not significant
5214	IMPC_CBC_013_001	Alanine aminotransferase	2.74946e-09	1	0.996677	0.942265	40	6	0.864886	0.148163	0.42046	0.936747	0.327754	0.85479	0.86857	-0.0722049	0.674731	0.272771	0.476665	-0.417181	0.92677	0.911597	1.0226	0.908092	1.12148	0.109419	0.498714	0.306373	0.851254	-0.191238	0.957967	Phyh	Not significant
5215	IMPC_CBC_013_001	Alanine aminotransferase	6.1727e-09	1	0.999205	0.998663	40	6	0.103852	0.160718	0.120007	0.190395	0.380778	0.302969	0.113709	0.680458	0.09789	1.10099	0.63498	0.259922	0.411138	0.752207	1.20132	1.51837	0.927536	0.112797	0.506416	0.345439	0.477192	-0.334655	0.82231	Pipox	Not significant
5216	IMPC_CBC_013_001	Alanine aminotransferase	9.44906e-10	1	0.91159	0.913977	40	6	0.0936885	0.212272	0.111876	0.312295	0.374597	0.504742	0.103066	-0.700678	0.742531	-0.204874	0.0446426	-1.19648	0.877006	0.279016	0.687198	0.794581	0.594466	0.113213	0.482913	0.307598	0.577545	-0.508695	0.787561	Pmm2	Not significant
5217	IMPC_CBC_013_001	Alanine aminotransferase	2.75215e-09	1	0.986678	0.962059	40	6	0.948057	0.0586019	0.286775	0.979261	0.161481	0.637491	0.949485	-0.027643	0.747142	-0.207294	0.792038	0.152008	0.890823	0.956816	0.937756	0.760405	1.09091	0.120496	0.483314	0.372094	0.391465	0.842617	0.724502	Ptpn12	Not significant
5218	IMPC_CBC_013_001	Alanine aminotransferase	1.51547e-07	0.997634	0.992905	0.99923	39	6	0.0335778	0.049386	0.173538	0.0966219	0.145071	0.492857	0.0491307	0.799936	0.0248575	1.30651	0.569136	0.309725	0.159314	0.774025	1.1837	1.49293	0.967589	0.032447	0.638252	0.105066	0.430636	-0.358536	0.735876	Pttg1	Genotype effect with no sex effect(real)
5219	IMPC_CBC_013_001	Alanine aminotransferase	7.72278e-09	1	0.985532	0.948178	40	6	0.701812	0.0332264	0.082614	0.926134	0.106325	0.85786	0.70964	0.162364	0.537542	-0.400436	0.180643	0.725165	0.985589	0.831471	1.14985	0.718906	1.522	0.132047	0.447182	0.369473	0.169713	1.57278	0.562174	Rock1	Not significant
5220	IMPC_CBC_013_001	Alanine aminotransferase	5.50686e-09	1	0.985762	0.962011	40	6	0.203601	0.0502142	0.120083	0.458911	0.165824	0.468623	0.216314	0.534856	0.59776	0.340277	0.191214	0.729436	0.852625	0.696214	1.13402	0.952032	1.29117	0.118899	0.497525	0.403175	0.110154	0.886684	0.44691	Sra1	Not significant
5221	IMPC_CBC_013_001	Alanine aminotransferase	1.75401e-07	0.997765	0.99997	0.996263	39	6	0.0504865	0.000455945	0.0164587	0.168628	0.00279278	0.214913	0.664621	-0.180116	0.0601128	-1.01482	0.193397	0.669531	0.321352	0.562609	1.04015	0.746465	1.26061	0.0344237	0.582992	0.200283	0.0122344	2.26734	0.177724	Ulk3	Interaction_cannot classify2
5222	IMPC_CBC_013_001	Alanine aminotransferase	8.94022e-09	1	0.997633	0.990382	40	6	0.899201	0.121209	0.483925	0.925078	0.304936	0.793592	0.901961	0.0537546	0.851489	0.130006	0.966348	-0.0224973	0.947531	0.973154	1.00959	1.16563	0.874835	0.128351	0.457178	0.407872	0.806296	0.304674	0.923254	Ywhaz	Not significant
47	IMPC_CBC_007_001	Albumin	0.498637	0.999997	0.284198	0.523791	40	6	0.516006	5.45306e-07	0.265932	0.805052	4.83854e-06	0.776	0.630961	-0.209182	0.176837	-0.564254	0.784456	0.14589	0.617656	0.93848	0.992016	0.977021	1.00818	4.21684e-06	-1.34877	4.69877e-05	0.00920038	-0.63862	0.0937288	A2m	Not significant
471	IMPC_CBC_007_001	Albumin	0.443725	0.999998	0.372035	0.733535	40	6	0.938874	2.45797e-07	0.926332	0.98812	2.98234e-06	0.959047	0.955478	-0.0243474	0.990733	0.00500614	0.917142	-0.0537009	0.992161	0.959309	0.997679	0.997762	0.997588	7.03085e-06	-1.27687	6.83554e-05	0.0455373	-1.33558	0.390373	Ahcy	Not significant
472	IMPC_CBC_007_001	Albumin	0.20304	0.996072	0.54714	0.89211	39	6	0.00440196	3.48986e-09	0.00106339	0.0332788	6.34088e-08	0.0251225	0.822153	-0.0934148	0.0256748	0.804655	0.0287047	-1.01749	0.166886	0.193756	0.986414	1.04003	0.927004	1.61193e-05	-1.01438	0.000108656	0.00207755	-2.83652	0.392657	Atp6v0d1	Different direction
473	IMPC_CBC_007_001	Albumin	0.238476	0.999994	0.241009	0.812767	39	6	0.060356	2.60474e-06	0.0995624	0.165741	1.84572e-05	0.460267	0.167443	0.594875	0.831738	0.0951628	0.0272763	1.12907	0.988219	0.336273	1.03031	1.00431	1.06068	1.65389e-06	-1.34479	1.46488e-05	0.636396	-0.310889	0.916795	C8a	Not significant
474	IMPC_CBC_007_001	Albumin	0.325712	0.99999	0.56568	0.794544	40	6	0.655445	5.90955e-06	0.139053	0.723908	4.44398e-05	0.399047	0.72855	0.151185	0.451536	-0.343601	0.234011	0.645971	0.657436	0.448918	1.00787	0.975929	1.04229	9.75731e-06	-1.29079	6.34225e-05	0.617069	-0.301217	0.937226	Dhfr	Not significant
475	IMPC_CBC_007_001	Albumin	0.668611	0.999998	0.571874	0.868609	40	6	0.0159433	1.10247e-06	0.351464	0.105326	9.16791e-06	0.737697	0.0667199	-0.784397	0.0106988	-1.07673	0.362522	-0.492062	0.0994361	0.982945	0.951249	0.940997	0.962296	6.70036e-06	-1.25981	5.99091e-05	0.213912	-0.675139	0.51668	Dync1li1	Genotype effect with no sex effect(real)
476	IMPC_CBC_007_001	Albumin	0.335688	0.999997	0.459682	0.833817	40	6	0.406327	3.18964e-07	0.993556	0.582716	2.36033e-06	0.993556	0.543939	0.264021	0.545671	0.261463	0.605457	0.266579	0.776583	0.8297	1.01014	1.0065	1.01406	8.57777e-06	-1.27575	4.77138e-05	0.0189852	-1.27063	0.251832	G6pd2	Not significant
477	IMPC_CBC_007_001	Albumin	0.236844	0.995814	0.449707	0.252128	40	6	8.4206e-06	4.93145e-06	0.00129972	0.000774696	3.02462e-05	0.0245969	0.0021778	1.26128	0.49415	0.272072	8.88147e-05	2.2505	0.721616	0.00817095	1.07525	1.01523	1.13993	1.06831e-05	-1.14722	7.28035e-05	0.0836621	0.831202	0.206838	Galc	One sex_Male only
478	IMPC_CBC_007_001	Albumin	0.309941	0.99254	0.5937	0.895534	39	6	0.0626702	6.40083e-08	0.0233121	0.324746	1.21616e-06	0.492676	0.626699	0.201768	0.0202033	0.838494	0.342821	-0.462555	0.478317	0.792195	1.00686	1.04551	0.963473	1.65596e-05	-1.07625	0.00016657	0.00523149	-2.3773	0.275795	Gnpda1	Interaction_One sex_Female only2
479	IMPC_CBC_007_001	Albumin	0.326574	0.999988	0.305506	0.979229	38	6	0.260904	1.49506e-09	0.135733	0.410779	2.67616e-08	0.669368	0.420112	-0.350567	0.831046	0.0911354	0.0670843	-0.72194	0.962203	0.226568	0.975495	1.00213	0.95106	1.31931e-07	-1.33625	1.443e-06	0.0250381	-2.14932	0.64689	Idh1	Not significant
4710	IMPC_CBC_007_001	Albumin	0.309701	0.999988	0.259468	0.972277	38	6	0.219213	1.9269e-09	0.817329	0.432336	4.56033e-08	0.870936	0.380766	-0.378696	0.509525	-0.277914	0.324705	-0.404996	0.799437	0.523956	0.974927	0.987937	0.965326	1.46779e-07	-1.41516	2.98575e-06	0.0229205	-1.54224	0.228741	Lmbrd1	Not significant
4711	IMPC_CBC_007_001	Albumin	0.250308	0.999987	0.296843	0.975036	38	6	0.29109	1.21313e-09	0.125136	0.685916	1.46586e-08	0.585312	0.44733	-0.328698	0.77576	0.120381	0.069996	-0.707702	0.87949	0.634339	0.976062	1.00104	0.953438	3.5406e-07	-1.33144	3.16399e-06	0.00199601	-2.15953	0.0578842	Mfap4	Not significant
4712	IMPC_CBC_007_001	Albumin	0.199624	0.999996	0.241022	0.812972	39	6	0.534282	3.48938e-07	0.859374	0.753987	2.02652e-06	0.913841	0.678536	0.180078	0.562251	0.252146	0.783903	0.140392	0.781892	0.97826	1.0065	1.00868	1.00629	2.35847e-06	-1.26287	1.5866e-05	0.198028	-1.37463	0.623498	Mmachc	Not significant
4713	IMPC_CBC_007_001	Albumin	0.360128	0.999994	0.696635	0.915977	40	6	0.829765	4.46289e-06	0.0638727	0.895434	2.51834e-05	0.318261	0.867921	-0.0724928	0.122772	-0.685658	0.318652	0.540672	0.376901	0.599369	1.00221	0.968288	1.03876	5.58751e-06	-1.33378	3.41956e-05	0.807715	-0.107448	0.960818	Mvk	Not significant
4714	IMPC_CBC_007_001	Albumin	0.142311	0.999998	0.402093	0.978581	39	6	0.332321	4.12642e-07	0.28504	0.703769	2.80989e-06	0.724858	0.503341	0.28967	0.953402	-0.0264197	0.189931	0.640599	0.973832	0.894427	1.015	0.995579	1.03821	1.59992e-06	-1.35872	1.36993e-05	0.296948	-0.691701	0.650783	Nek2	Not significant
4715	IMPC_CBC_007_001	Albumin	0.319225	0.99999	0.383818	0.960387	39	6	0.175141	9.5588e-07	0.427882	0.392816	7.14634e-06	0.791626	0.297396	-0.449174	0.122027	-0.682435	0.72203	-0.182556	0.522765	0.906164	0.974178	0.96283	0.988549	1.5489e-06	-1.30096	1.17717e-05	0.401578	-0.801077	0.741762	Npc2	Not significant
4716	IMPC_CBC_007_001	Albumin	0.320992	0.999995	0.661443	0.815756	40	6	0.829005	2.87365e-06	0.09341	0.888789	1.2975e-05	0.366266	0.868529	-0.07216	0.157013	-0.62408	0.374007	0.479761	0.726631	0.657892	1.00277	0.970471	1.03759	5.98618e-06	-1.33611	3.49593e-05	0.508382	-0.232269	0.710175	Pebp1	Not significant
4717	IMPC_CBC_007_001	Albumin	0.0652817	0.906093	0.29103	0.64535	37	6	0.695623	2.95867e-08	0.393367	0.832982	2.87977e-07	0.85479	0.890877	0.0572338	0.430205	0.348451	0.741489	-0.132396	0.803235	0.938888	1.00242	1.01632	0.99409	5.66514e-07	-1.2529	4.40622e-06	0.0976643	-1.73375	0.548422	Phyh	Not significant
4718	IMPC_CBC_007_001	Albumin	0.444024	0.999997	0.382876	0.704335	40	6	0.554038	5.5114e-07	0.842267	0.666577	4.46714e-06	0.900758	0.661531	-0.190682	0.553066	-0.254673	0.811224	-0.126692	0.75982	0.892346	0.986354	0.985754	0.987001	1.03946e-05	-1.27242	6.64348e-05	0.0451772	-1.14444	0.415903	Pipox	Not significant
4719	IMPC_CBC_007_001	Albumin	0.314271	0.999996	0.318683	0.704621	40	6	0.685427	1.87349e-06	0.736749	0.740448	1.34551e-05	0.802803	0.758378	0.134056	0.958913	0.022972	0.650046	0.24514	0.97393	0.715829	1.00617	1.00431	1.00818	1.17509e-05	-1.23836	6.37905e-05	0.237997	-1.01619	0.934618	Plk1	Not significant
4720	IMPC_CBC_007_001	Albumin	0.282219	0.999997	0.303411	0.579418	40	6	0.953851	2.75403e-07	0.639106	0.975517	2.06553e-06	0.829605	0.966313	-0.018414	0.757261	0.130618	0.749291	-0.167446	0.884431	0.863348	0.993715	1.00213	0.984648	1.59749e-05	-1.24143	8.51993e-05	0.00098614	-1.53949	0.147921	Pmm2	Not significant
4721	IMPC_CBC_007_001	Albumin	0.137343	0.992465	0.452973	0.725605	39	6	0.0152912	8.7331e-06	0.73133	0.164459	4.01076e-05	0.934896	0.0566497	0.775105	0.0932677	0.656553	0.105488	0.864903	0.321255	0.810278	1.03752	1.02359	1.05053	2.04116e-05	-1.12141	0.00010948	0.22815	-0.913063	0.544051	Ptpn12	Genotype effect with no sex effect(real)
4722	IMPC_CBC_007_001	Albumin	0.548975	0.999998	0.900637	0.91296	40	6	0.926712	2.30237e-06	0.247988	0.949396	1.24859e-05	0.565877	0.944053	0.0306028	0.450006	-0.350962	0.430699	0.412167	0.737831	0.681106	1.00391	0.978113	1.0317	5.86624e-06	-1.30087	3.19123e-05	0.457174	-0.537743	0.735876	Pttg1	Not significant
4723	IMPC_CBC_007_001	Albumin	0.388907	0.999997	0.317364	0.659182	40	6	0.680149	2.69649e-07	0.565531	0.926134	1.96108e-06	0.937495	0.76372	-0.131025	0.905406	0.0511144	0.544124	-0.313165	0.985589	0.853527	0.997679	1.00977	0.984648	8.81174e-06	-1.23378	5.28704e-05	0.0523505	-1.59806	0.379337	Rock1	Not significant
4724	IMPC_CBC_007_001	Albumin	0.298552	0.999983	0.431468	0.910705	40	6	0.348718	2.87654e-07	0.522898	0.66024	4.08468e-06	0.834286	0.494573	0.296753	0.249122	0.497664	0.851306	0.0958423	0.544827	0.992346	1.0175	1.03051	1.00347	8.81578e-06	-1.22522	0.00010432	0.0465653	-1.62704	0.259351	Sra1	Not significant
53	IMPC_CBC_014_001	Alkaline phosphatase	0.00769913	0.998183	0.9518	0.275553	39	6	0.306978	1.47108e-11	0.0837255	0.680704	1.19893e-09	0.442598	0.521	0.266324	0.0432217	0.658584	0.67575	-0.16083	0.320234	0.912369	1.08172	1.15373	0.951937	7.34221e-09	-1.36083	2.86346e-07	0.00267981	-2.18024	0.0767043	A2m	Not significant
531	IMPC_CBC_014_001	Alkaline phosphatase	0.0294332	1	0.712262	0.275553	40	6	0.896653	1.49395e-11	0.556004	0.98812	2.71899e-09	0.930297	0.938629	-0.0336039	0.632872	-0.185628	0.758332	0.11842	0.9155	0.904058	0.978764	0.967986	0.996054	2.05516e-09	-1.57684	2.30387e-07	0.00900969	-1.27279	0.273294	Ahcy	Not significant
532	IMPC_CBC_014_001	Alkaline phosphatase	0.382462	1	0.942261	0.837151	40	6	0.145046	1.22255e-10	0.237006	0.268761	1.3034e-08	0.605327	0.369639	-0.38977	0.0734326	-0.700049	0.843928	-0.0794919	0.233325	0.921979	0.915056	0.852556	1.01532	2.14999e-10	-1.575	3.91298e-08	0.273668	-0.954444	0.646475	Atp6v0d1	Not significant
533	IMPC_CBC_014_001	Alkaline phosphatase	0.0350069	1	0.781796	0.259951	40	6	0.300167	1.92894e-11	0.265636	0.505687	2.11951e-09	0.649089	0.538377	-0.267964	0.9668	0.016344	0.142511	-0.552271	0.988219	0.480868	0.987354	1.02725	0.923354	1.58905e-09	-1.45803	2.27561e-07	0.0342155	-2.02665	0.240636	C8a	Not significant
534	IMPC_CBC_014_001	Alkaline phosphatase	0.0154548	0.998183	0.9518	0.275553	39	6	0.000135352	1.74755e-14	2.61859e-05	0.00282734	3.28539e-12	0.00246148	0.862814	-0.0718637	0.00719817	0.842579	0.00348875	-1.01769	0.127102	0.0385814	1.0427	1.20174	0.77609	1.54366e-09	-1.22397	2.1883e-07	0.00115475	-3.08424	0.108547	Dhfr	Different direction
535	IMPC_CBC_014_001	Alkaline phosphatase	0.0644817	1	0.834087	0.237987	40	6	0.659701	2.49224e-11	0.102427	0.885602	7.87548e-10	0.404934	0.792008	0.115051	0.437491	-0.305125	0.157086	0.535226	0.720542	0.764511	0.986638	0.899812	1.12592	4.16641e-10	-1.63672	6.33294e-08	0.0911056	-0.796367	0.417993	Dync1li1	Not significant
536	IMPC_CBC_014_001	Alkaline phosphatase	0.028145	1	0.712262	0.275553	40	6	0.953085	1.49395e-11	0.843376	0.974148	7.67215e-10	0.963115	0.97218	0.0152217	0.92662	-0.035885	0.863285	0.0663283	0.968502	0.92843	0.985922	0.984642	0.987977	2.61065e-09	-1.55051	9.2939e-08	0.0149235	-1.4483	0.230071	G6pd2	Not significant
537	IMPC_CBC_014_001	Alkaline phosphatase	0.14821	1	0.933739	0.404597	40	6	0.0534929	2.51888e-11	0.0199563	0.185711	9.26946e-10	0.135999	0.686648	0.175907	0.288507	-0.421598	0.0381803	0.773412	0.525596	0.334532	1.02362	0.890903	1.23652	2.2453e-10	-1.6683	4.13136e-08	0.146399	-0.473292	0.273378	Galc	Interaction_One sex_Male only2
538	IMPC_CBC_014_001	Alkaline phosphatase	0.0377591	1	0.910701	0.349857	40	6	0.000514222	1.5832e-12	0.731552	0.0192545	2.70728e-10	0.905797	0.0405202	-0.872763	0.0398705	-0.792195	0.00923358	-0.953331	0.478317	0.197368	0.789788	0.774698	0.813993	5.58374e-10	-1.48254	9.5482e-08	0.0134631	-1.64368	0.275795	Gnpda1	Genotype effect with no sex effect(real)
539	IMPC_CBC_014_001	Alkaline phosphatase	0.113006	1	0.888837	0.330755	40	6	0.0641751	1.72897e-11	0.0193007	0.157361	2.56789e-09	0.41741	0.935218	-0.0354756	0.100287	-0.63257	0.138925	0.561619	0.284941	0.372971	0.96397	0.843259	1.15761	1.87522e-10	-1.67815	3.28163e-08	0.0813662	-0.483964	0.752066	Idh1	Interaction_cannot classify2
5310	IMPC_CBC_014_001	Alkaline phosphatase	0.0890762	1	0.949003	0.700827	40	6	0.093821	7.93823e-11	0.182323	0.292995	8.85418e-10	0.665748	0.307848	0.44244	0.806405	0.0989749	0.0379909	0.785905	0.904611	0.253105	1.13839	1.04003	1.29618	6.30942e-10	-1.59294	3.78615e-08	0.119105	-0.906008	0.405373	Iqgap1	Not significant
5311	IMPC_CBC_014_001	Alkaline phosphatase	0.0118359	0.998183	0.971414	0.259951	39	6	0.121361	1.93985e-11	0.570879	0.418983	2.17247e-09	0.846437	0.341607	0.393485	0.129402	0.510204	0.532482	0.240144	0.586355	0.822934	1.09747	1.11163	1.05881	5.80905e-09	-1.42827	4.06633e-07	0.000975988	-1.69833	0.0518397	Mfap4	Not significant
5312	IMPC_CBC_014_001	Alkaline phosphatase	0.0433444	1	0.833306	0.242729	40	6	0.212062	2.49502e-11	0.403682	0.6082	8.91968e-10	0.759559	0.456912	0.323678	0.781455	0.109725	0.155173	0.53763	0.933721	0.894427	1.0587	1.01563	1.12778	1.55558e-09	-1.58293	2.13114e-07	0.00956606	-1.15503	0.0856384	Nek2	Not significant
5313	IMPC_CBC_014_001	Alkaline phosphatase	0.0197621	1	0.711721	0.275553	40	6	0.051061	1.49398e-11	0.514733	0.205553	7.81847e-10	0.806032	0.253666	0.494515	0.0807622	0.655872	0.382846	0.333158	0.522765	0.760846	1.15939	1.21473	1.07062	1.34129e-09	-1.49509	6.79588e-08	0.0153258	-1.8178	0.110098	Npc2	Not significant
5314	IMPC_CBC_014_001	Alkaline phosphatase	0.0168535	1	0.711721	0.275553	40	6	0.25209	1.49398e-11	0.736576	0.521686	5.56506e-10	0.853204	0.499125	0.294224	0.323776	0.379975	0.58715	0.208473	0.861475	0.812539	1.05273	1.08187	1.006	3.99913e-09	-1.51481	2.61196e-07	0.00325235	-1.68632	0.0812363	Pebp1	Not significant
5315	IMPC_CBC_014_001	Alkaline phosphatase	0.057138	1	0.781279	0.259951	40	6	0.770818	1.92897e-11	0.219477	0.879214	2.8163e-09	0.707999	0.862201	-0.0757466	0.53786	0.240798	0.30394	-0.392291	0.897562	0.781055	0.999523	1.05591	0.909063	2.49467e-09	-1.44963	1.94323e-07	0.0294801	-2.08272	0.269006	Phyh	Not significant
5316	IMPC_CBC_014_001	Alkaline phosphatase	0.029609	1	0.71261	0.275553	40	6	0.233265	1.4939e-11	0.698563	0.320739	1.1503e-09	0.796415	0.481953	-0.306039	0.292593	-0.40462	0.588984	-0.207459	0.587142	0.707427	0.909807	0.900199	0.925218	1.57775e-09	-1.56289	1.51614e-07	0.0133851	-1.36573	0.415903	Pipox	Not significant
5317	IMPC_CBC_014_001	Alkaline phosphatase	0.0620373	1	0.786141	0.971928	40	6	0.0290985	7.83902e-10	0.143708	0.0692768	8.20677e-08	0.334376	0.16554	0.598593	0.604391	0.212344	0.0142266	0.984843	0.852623	0.090219	1.16416	1.04158	1.3608	1.79125e-09	-1.55223	1.17961e-07	0.194797	-0.779726	0.915525	Plk1	Genotype effect with no sex effect(real)
5318	IMPC_CBC_014_001	Alkaline phosphatase	0.0131579	0.966758	0.971414	0.181349	39	6	0.680426	1.56163e-11	0.0873066	0.864948	7.80813e-10	0.485037	0.774274	0.118638	0.130443	0.508904	0.416299	-0.306339	0.559039	0.631005	1.04997	1.10573	0.946345	2.88129e-09	-1.35378	2.25398e-07	0.0179209	-2.16902	0.150796	Pmm2	Not significant
5319	IMPC_CBC_014_001	Alkaline phosphatase	0.0195504	1	0.712262	0.270977	40	6	0.650308	1.48943e-11	0.950872	0.806382	1.31347e-09	0.977483	0.788297	0.117142	0.73242	0.133045	0.79252	0.10124	0.890393	0.956816	1.03245	1.06017	0.987977	1.7861e-09	-1.53294	2.1076e-07	0.0353227	-1.56475	0.188878	Ptpn12	Not significant
5320	IMPC_CBC_014_001	Alkaline phosphatase	0.0838203	1	0.834087	0.242729	40	6	0.747412	2.49489e-11	0.0644845	0.839652	3.5178e-09	0.319236	0.84701	0.0841926	0.318661	-0.390023	0.139028	0.558409	0.718741	0.33764	0.983059	0.890516	1.13151	3.27687e-10	-1.65082	4.45654e-08	0.0880913	-0.70239	0.559713	Pttg1	Not significant
5321	IMPC_CBC_014_001	Alkaline phosphatase	0.0255694	0.980041	0.80146	0.275553	39	6	0.779063	1.39485e-11	0.733428	0.937219	2.04044e-09	0.937495	0.834064	0.0870032	0.965439	-0.0147771	0.695536	0.15052	0.985589	0.904762	0.985274	0.966822	0.999783	9.44993e-10	-1.49227	1.47419e-07	0.0624339	-1.32697	0.379337	Rock1	Not significant
5322	IMPC_CBC_014_001	Alkaline phosphatase	0.00967254	0.942703	0.9518	0.549866	37	6	0.00440481	6.12751e-13	0.00126672	0.034749	8.70106e-11	0.0485397	0.663613	-0.16482	0.128852	0.50589	0.00337352	-0.803925	0.42551	0.11976	0.985974	1.10966	0.809745	5.29516e-09	-1.16939	3.30971e-07	0.00136174	-2.47921	0.173356	Sra1	One sex_Male only
5323	IMPC_CBC_014_001	Alkaline phosphatase	0.0532596	1	0.711721	0.275553	40	6	0.00351151	9.17764e-13	0.00652047	0.0508362	1.17474e-10	0.208655	0.247885	-0.500493	0.703824	0.147882	0.000636469	-1.14887	0.867982	0.027156	0.913386	1.02686	0.731351	2.60036e-09	-1.36804	2.38491e-07	0.00129781	-2.66479	0.0599122	Ulk3	One sex_Male only
5324	IMPC_CBC_014_001	Alkaline phosphatase	0.0940421	1	0.865299	0.458028	40	6	0.668886	3.10474e-11	0.100064	0.863455	1.97434e-09	0.631787	0.796916	0.112278	0.426294	-0.312773	0.159182	0.53733	0.762001	0.615556	1.02816	0.943195	1.16445	5.49154e-10	-1.63362	7.85291e-08	0.0742543	-0.783517	0.337222	Ywhaz	Not significant
129	IMPC_IPG_012_001	Area under glucose response curve	0.421213	1	0.997124	0.996115	35	6	0.258887	1.17495e-06	0.536913	0.639371	9.11989e-06	0.842528	0.345289	-0.413489	0.238937	-0.555614	0.729744	-0.167003	0.736493	0.916153	0.867825	0.787154	0.946653	6.21358e-05	1.21755	0.000440599	0.00459211	1.60616	0.0767043	A2m	Not significant
1291	IMPC_IPG_012_001	Area under glucose response curve	0.743724	1	0.916308	0.997118	35	6	0.0851029	8.26543e-06	0.550593	0.349425	6.54047e-05	0.930297	0.238292	0.514998	0.104416	0.762043	0.465234	0.376827	0.846283	0.841098	1.14461	1.23732	1.10783	4.74148e-05	1.2702	0.000377163	0.0514778	0.884982	0.390373	Ahcy	Not significant
1292	IMPC_IPG_012_001	Area under glucose response curve	0.415179	1	0.97133	0.991551	35	6	0.269611	1.04215e-06	0.383715	0.492791	9.26355e-06	0.639526	0.502642	0.294535	0.873118	0.0736862	0.203905	0.619465	0.926643	0.643158	1.0783	0.982587	1.17306	3.89375e-05	1.21428	0.00037234	0.0279617	1.76006	0.248549	Atp5b	Not significant
1293	IMPC_IPG_012_001	Area under glucose response curve	0.544248	1	0.84285	0.989803	35	6	0.269686	5.05711e-05	0.128417	0.426547	0.000265498	0.580369	0.445349	0.335043	0.0657728	0.906187	0.812332	-0.126905	0.233325	0.913874	1.10044	1.27824	1.00241	7.29932e-05	1.27395	0.000447834	0.562844	0.240856	0.794531	Atp6v0d1	Not significant
1294	IMPC_IPG_012_001	Area under glucose response curve	0.370913	1	0.983142	0.998923	35	6	0.785141	5.80905e-07	0.150958	0.883167	4.72301e-06	0.513257	0.747319	-0.141877	0.238721	-0.537969	0.458604	0.354987	0.562458	0.676987	0.982924	0.805718	1.13288	7.94424e-05	1.17568	0.000434597	0.000410949	2.06864	0.0523184	C8a	Not significant
1295	IMPC_IPG_012_001	Area under glucose response curve	0.741184	1	0.967905	0.982273	35	6	0.890285	1.98668e-06	0.940731	0.916625	1.32955e-05	0.981142	0.982998	-0.00939079	0.884156	0.069139	0.966659	0.0209259	0.950251	0.997758	0.99174	0.99846	1.01191	5.08812e-05	1.26988	0.000307104	0.024022	1.22166	0.286138	Cdk4	Not significant
1296	IMPC_IPG_012_001	Area under glucose response curve	0.702744	1	0.977466	0.997902	35	6	0.42559	7.66642e-07	0.0419041	0.522947	6.86327e-06	0.238726	0.656388	0.195804	0.407607	-0.380615	0.0638755	0.868244	0.626156	0.190613	1.07097	0.918267	1.20582	3.55762e-05	1.12025	0.000220979	0.0287764	2.36911	0.491814	Dhfr	Interaction_cannot classify2
1297	IMPC_IPG_012_001	Area under glucose response curve	0.849197	1	0.999791	0.998927	35	6	0.0417787	2.01939e-05	0.260568	0.209818	0.000147744	0.685431	0.136812	0.646282	0.0314497	1.07066	0.528652	0.32791	0.192565	0.982945	1.17476	1.38637	1.05469	7.47166e-05	1.23671	0.000540806	0.308047	0.493965	0.63094	Dync1li1	Genotype effect with no sex effect(real)
1298	IMPC_IPG_012_001	Area under glucose response curve	0.793714	1	0.907507	0.994661	35	6	0.221982	4.09126e-06	0.992953	0.391111	2.36526e-05	0.993556	0.430499	0.345995	0.399043	0.402059	0.43332	0.396337	0.668638	0.715751	1.09279	1.13083	1.09335	5.85069e-05	1.24141	0.000297549	0.0502107	1.23568	0.331749	G6pd2	Not significant
1299	IMPC_IPG_012_001	Area under glucose response curve	0.60526	1	0.893619	0.98508	35	6	0.0387128	5.5799e-05	0.01193	0.158292	0.000291564	0.103994	0.652198	-0.198351	0.153106	0.733649	0.0574182	-1.02105	0.361174	0.364308	0.943661	1.24651	0.753297	5.53568e-05	1.2752	0.00035123	0.435541	-0.479494	0.579028	Galc	cannot classify
12910	IMPC_IPG_012_001	Area under glucose response curve	0.51061	1	0.981425	0.999013	35	6	0.761669	2.71405e-06	0.861361	0.880036	2.73002e-05	0.962698	0.729156	-0.152462	0.745495	-0.156718	0.931845	-0.0427587	0.885288	0.974611	0.954239	0.90867	1.01043	6.30607e-05	1.23021	0.000588353	0.0624454	1.34417	0.477056	Gnpda1	Not significant
12911	IMPC_IPG_012_001	Area under glucose response curve	0.274827	1	0.97857	0.994522	35	6	0.328745	2.31572e-06	0.21248	0.478418	1.59429e-05	0.669368	0.551362	0.26191	0.855979	-0.0863377	0.147915	0.708334	0.966857	0.372971	1.08779	0.953599	1.20997	7.12883e-05	1.1454	0.000389858	0.0433019	1.94007	0.64689	Idh1	Not significant
12912	IMPC_IPG_012_001	Area under glucose response curve	0.654657	1	0.918517	0.994951	35	6	0.839705	2.34722e-05	0.43363	0.882299	0.000117361	0.692068	0.963772	0.0200152	0.479427	0.340704	0.719317	-0.19501	0.881718	0.879827	0.982707	1.07989	0.938703	7.2707e-05	1.23274	0.000350999	0.391199	0.69703	0.690237	Iqgap1	Not significant
12913	IMPC_IPG_012_001	Area under glucose response curve	0.561449	1	0.677017	0.998286	35	6	0.0222095	3.16931e-05	0.357896	0.121262	0.000250023	0.584152	0.0872184	0.739537	0.0475694	1.09497	0.314889	0.485706	0.428542	0.513957	1.21823	1.38931	1.12791	6.25859e-05	1.18532	0.000538562	0.499794	0.576058	0.788088	Lmbrd1	Genotype effect with no sex effect(real)
12914	IMPC_IPG_012_001	Area under glucose response curve	0.237679	1	0.977129	0.999424	35	6	0.105833	8.45853e-06	0.963453	0.401635	4.22927e-05	0.991423	0.179293	-0.584912	0.286449	-0.518889	0.279083	-0.548668	0.75002	0.822934	0.836977	0.814281	0.874049	8.39784e-05	1.19311	0.000391899	0.103807	1.16333	0.394054	Mfap4	Not significant
12915	IMPC_IPG_012_001	Area under glucose response curve	0.581192	1	0.975807	0.999861	35	6	0.113837	2.26642e-06	0.660113	0.337047	1.14076e-05	0.840688	0.30137	0.452283	0.430589	0.36625	0.195332	0.643452	0.687641	0.634082	1.15227	1.11662	1.20642	5.8727e-05	1.22658	0.00029971	0.00550051	1.50378	0.142298	Mmachc	Not significant
12916	IMPC_IPG_012_001	Area under glucose response curve	0.83931	1	0.998142	0.998692	35	6	0.0702025	7.70471e-05	0.0248097	0.255684	0.000465246	0.247369	0.742186	0.14486	0.0624723	0.983299	0.267393	-0.584775	0.522765	0.688275	1.02347	1.29659	0.856133	5.50198e-05	1.26937	0.000311544	0.667205	-0.298707	0.859666	Npc2	Interaction_cannot classify2
12917	IMPC_IPG_012_001	Area under glucose response curve	0.473156	1	0.977466	0.997902	35	6	0.943518	7.66642e-07	0.269372	0.946544	3.80766e-06	0.585716	0.939916	-0.0332141	0.474461	-0.329605	0.451553	0.365762	0.922822	0.729227	0.972799	0.850605	1.08362	6.42802e-05	1.19683	0.000302739	0.0074652	1.89219	0.091331	Pebp1	Not significant
12918	IMPC_IPG_012_001	Area under glucose response curve	0.615277	1	0.824226	0.995369	35	6	0.218308	8.31935e-06	0.541065	0.531216	4.49861e-05	0.869744	0.415638	0.357168	0.677507	0.205723	0.228427	0.60724	0.92677	0.6948	1.15568	1.12749	1.20464	6.27271e-05	1.15065	0.000313635	0.146173	1.55216	0.595524	Phyh	Not significant
12919	IMPC_IPG_012_001	Area under glucose response curve	0.492505	1	0.962656	0.999646	35	6	0.316338	1.34548e-05	0.721288	0.39048	7.33055e-05	0.791413	0.376259	-0.38793	0.66713	-0.216792	0.372614	-0.455623	0.878388	0.474783	0.903949	0.924538	0.912105	7.05572e-05	1.20685	0.000345958	0.25791	0.96802	0.947671	Plk1	Not significant
12920	IMPC_IPG_012_001	Area under glucose response curve	0.716582	1	0.993325	0.969899	35	6	0.790076	3.76007e-05	0.137237	0.911963	0.000188003	0.527835	0.920553	0.0439483	0.25369	0.60769	0.415033	-0.410018	0.704694	0.631005	0.975884	1.13921	0.884953	4.69059e-05	1.28071	0.00024123	0.704101	0.262998	0.872853	Pmm2	Not significant
12921	IMPC_IPG_012_001	Area under glucose response curve	0.653361	1	0.990585	0.991147	35	6	0.874583	1.2466e-06	0.500732	0.951301	6.44075e-06	0.73285	0.99223	-0.00429152	0.718876	-0.167435	0.595669	0.263242	0.882581	0.941587	0.964285	0.911611	1.02575	7.73881e-05	1.21788	0.000397035	0.00370122	1.64856	0.0509947	Ptpn12	Not significant
12922	IMPC_IPG_012_001	Area under glucose response curve	0.696878	1	0.971679	0.995814	35	6	0.000177234	4.0459e-06	0.911456	0.00114754	1.84023e-05	0.972487	0.00516785	1.17216	0.0101426	1.25345	0.0159809	1.18719	0.0975955	0.0639237	1.34296	1.42231	1.32061	6.37504e-05	1.12373	0.000279679	0.0886366	1.05748	0.559713	Pttg1	Genotype effect with no sex effect(real)
12923	IMPC_IPG_012_001	Area under glucose response curve	0.552193	1	0.925136	0.97792	35	6	0.976728	9.77291e-06	0.485891	0.983303	4.88645e-05	0.937495	0.889948	-0.0609676	0.648824	0.227011	0.63842	-0.240744	0.985589	0.890024	0.977938	1.05569	0.947549	6.51738e-05	1.26236	0.000326827	0.200402	0.794607	0.572002	Rock1	Not significant
12924	IMPC_IPG_012_001	Area under glucose response curve	0.56916	1	0.990585	0.991147	35	6	0.748829	1.2466e-06	0.4622	0.863455	1.11415e-05	0.793592	0.913834	0.0476782	0.771614	-0.135109	0.499222	0.334461	0.919507	0.849866	1.01251	0.921602	1.10221	7.86531e-05	1.21328	0.000646572	0.00373598	1.68285	0.130031	Ywhaz	Not significant
51	IMPC_CBC_012_001	Aspartate aminotransferase	3.66932e-07	1	0.446428	0.950632	40	6	0.22087	0.171657	0.286382	0.586765	0.388612	0.779283	0.233833	0.51544	0.100036	0.756329	0.710864	0.27455	0.525998	0.912369	1.18632	1.40786	0.972716	0.304735	-0.32403	0.706266	0.316007	-0.80581	0.614262	A2m	Not significant
511	IMPC_CBC_012_001	Aspartate aminotransferase	1.89454e-07	1	0.620212	0.9488	40	6	0.0948574	0.108265	0.181532	0.366124	0.312765	0.86021	0.526524	0.275788	0.210744	-0.577349	0.128862	1.12892	0.846283	0.672153	1.09601	0.829598	1.35288	0.287973	-0.336713	0.676437	0.0666903	1.36956	0.432096	Ahcy	Not significant
512	IMPC_CBC_012_001	Aspartate aminotransferase	5.22462e-08	1	0.960757	0.98907	40	6	0.581047	0.653678	0.303748	0.747061	0.8462	0.615101	0.591496	-0.233859	0.0553653	-0.96785	0.487914	0.500132	0.219054	0.794963	0.876292	0.737616	1.01	0.31042	-0.31961	0.64638	0.192601	1.14837	0.577696	Atp6v0d1	Not significant
513	IMPC_CBC_012_001	Aspartate aminotransferase	5.77375e-08	1	0.610828	0.968812	40	6	0.676425	0.203053	0.608504	0.823173	0.432304	0.862175	0.684845	0.176983	0.60452	0.247777	0.886113	0.10619	0.87632	0.93646	0.953655	1.05106	0.859741	0.293296	-0.342282	0.619922	0.482925	-0.48387	0.871691	C8a	Not significant
514	IMPC_CBC_012_001	Aspartate aminotransferase	1.99284e-07	1	0.374587	0.930539	40	6	0.0830448	0.309484	0.247	0.159311	0.559452	0.535098	0.0918659	0.723877	0.15767	0.653892	0.284429	0.793863	0.420048	0.524242	1.26167	1.22389	1.29809	0.332513	-0.307202	0.657798	0.800541	-0.167231	0.939819	Dhfr	Not significant
515	IMPC_CBC_012_001	Aspartate aminotransferase	6.61243e-08	1	0.918417	0.953147	40	6	0.101251	0.165051	0.0949127	0.386098	0.377943	0.404934	0.110989	-0.685599	0.718383	-0.173995	0.0922881	-1.1972	0.892352	0.546172	0.793178	0.945602	0.646218	0.378453	-0.259336	0.740886	0.250282	-1.28255	0.569483	Dync1li1	Not significant
516	IMPC_CBC_012_001	Aspartate aminotransferase	2.25059e-08	1	0.433452	0.89582	40	6	0.0266894	0.144383	0.0488242	0.1018	0.33284	0.650605	0.0311499	-0.915608	0.165017	-0.61804	0.0945208	-1.21318	0.484575	0.514305	0.700286	0.780971	0.622493	0.274887	-0.334701	0.587692	0.157626	-0.929838	0.626861	G6pd2	cannot classify
517	IMPC_CBC_012_001	Aspartate aminotransferase	1.07644e-07	1	0.946185	0.994439	40	6	0.433681	0.565765	0.391763	0.591609	0.771117	0.625507	0.446438	0.331217	0.62321	-0.263936	0.186139	0.92637	0.813266	0.570825	1.23952	1.3065	1.17494	0.291721	-0.31916	0.658327	0.454588	0.871147	0.593883	Galc	Not significant
518	IMPC_CBC_012_001	Aspartate aminotransferase	6.2067e-08	1	0.909263	0.963405	40	6	0.201762	0.209262	0.324072	0.588821	0.483564	0.822677	0.214444	-0.537093	0.477257	-0.349294	0.316453	-0.724892	0.79964	0.77305	0.825389	0.919823	0.734339	0.315528	-0.306939	0.699473	0.51496	-0.682538	0.883099	Gnpda1	Not significant
519	IMPC_CBC_012_001	Aspartate aminotransferase	6.61773e-08	1	0.305879	0.944668	40	6	0.511518	0.423145	0.593306	0.640291	0.67427	0.884758	0.523205	0.278003	0.838568	-0.100643	0.372529	0.65665	0.962203	0.574208	0.975512	0.95146	0.998701	0.316683	-0.326986	0.605644	0.500314	0.430306	0.941683	Idh1	Not significant
5110	IMPC_CBC_012_001	Aspartate aminotransferase	2.11692e-07	1	0.483475	0.923509	40	6	0.0743948	0.51597	0.17389	0.254413	0.680143	0.665748	0.0827174	0.744415	0.542814	0.276207	0.103998	1.21262	0.881718	0.418686	1.30998	1.0452	1.56527	0.329668	-0.307432	0.63224	0.334829	0.628982	0.648796	Iqgap1	Not significant
5111	IMPC_CBC_012_001	Aspartate aminotransferase	3.08056e-08	1	0.564155	0.917799	40	6	0.151695	0.25721	0.331067	0.381766	0.473643	0.663784	0.163274	-0.601774	0.137764	-0.664214	0.474098	-0.539333	0.593987	0.79471	0.780812	0.761637	0.7993	0.277198	-0.337977	0.554397	0.816309	-0.213097	0.940936	Mmachc	Not significant
5112	IMPC_CBC_012_001	Aspartate aminotransferase	2.60976e-08	1	0.910838	0.970771	40	6	0.165289	0.48324	0.235121	0.366622	0.719099	0.47627	0.177227	-0.582844	0.0204285	-1.13476	0.966025	-0.0309291	0.189865	0.972178	0.770171	0.698362	0.839406	0.274658	-0.343893	0.609023	0.331381	0.759937	0.588295	Mvk	Not significant
5113	IMPC_CBC_012_001	Aspartate aminotransferase	4.08079e-08	1	0.923327	0.994834	40	6	0.33259	0.622172	0.353075	0.703769	0.804222	0.731735	0.346062	-0.409177	0.0645461	-1.00597	0.786875	0.18762	0.376163	0.92232	0.827114	0.7839	0.868779	0.342745	-0.296386	0.700099	0.339727	0.897208	0.687714	Nek2	Not significant
5114	IMPC_CBC_012_001	Aspartate aminotransferase	5.91526e-08	1	0.539428	0.949789	40	6	0.0931374	0.0856577	0.178082	0.267703	0.220463	0.680203	0.977813	0.0121387	0.0598647	-0.887629	0.215663	0.911907	0.522765	0.638852	0.925183	0.732343	1.11111	0.273483	-0.351889	0.593848	0.0148797	1.44765	0.110098	Npc2	Not significant
5115	IMPC_CBC_012_001	Aspartate aminotransferase	2.43617e-08	1	0.950699	0.993337	40	6	0.245827	0.372435	0.400369	0.515891	0.538278	0.67963	0.259058	-0.488995	0.0942597	-0.853018	0.861871	-0.124973	0.635544	0.954378	0.787714	0.805578	0.770491	0.27459	-0.348851	0.547431	0.61584	0.379194	0.804914	Pebp1	Not significant
5116	IMPC_CBC_012_001	Aspartate aminotransferase	2.33868e-07	1	0.538761	0.936916	40	6	0.94628	0.127936	0.330964	0.991341	0.345652	0.487127	0.947757	0.0285883	0.334514	0.459981	0.58065	-0.402805	0.589451	0.707427	1.14174	1.50218	0.794216	0.293796	-0.317103	0.616972	0.316779	-1.17989	0.802222	Pipox	Not significant
5117	IMPC_CBC_012_001	Aspartate aminotransferase	2.9708e-08	1	0.427658	0.940726	40	6	0.952769	0.198646	0.634469	0.975517	0.355133	0.829605	0.954067	0.0251411	0.79452	0.123025	0.922299	-0.0727428	0.89078	0.970507	0.883482	0.966693	0.803254	0.304283	-0.3387	0.61675	0.340323	-0.534468	0.628557	Pmm2	Not significant
5118	IMPC_CBC_012_001	Aspartate aminotransferase	2.43685e-07	1	0.621247	0.963981	40	6	0.129752	0.398348	0.312474	0.352962	0.686045	0.637491	0.140638	0.635155	0.466476	0.340136	0.21117	0.930175	0.705402	0.831891	1.1472	1.07508	1.21674	0.323316	-0.317494	0.615343	0.641492	0.272545	0.830726	Ptpn12	Not significant
5119	IMPC_CBC_012_001	Aspartate aminotransferase	9.94084e-08	1	0.479358	0.924265	40	6	0.794637	0.292439	0.756084	0.94882	0.557027	0.937495	0.800167	0.110446	0.879277	0.0698188	0.842369	0.151074	0.985589	0.911881	0.984139	0.952046	1.01508	0.33029	-0.309793	0.653641	0.807792	-0.228539	0.90949	Rock1	Not significant
5120	IMPC_CBC_012_001	Aspartate aminotransferase	8.8173e-08	1	0.427787	0.954647	40	6	0.323256	0.467817	0.44933	0.628799	0.675883	0.828634	0.336746	0.417073	0.95922	-0.0245796	0.246814	0.858726	0.987595	0.788707	1.02239	0.966693	1.07609	0.3221	-0.322199	0.693003	0.342054	0.561107	0.71429	Sra1	Not significant
5121	IMPC_CBC_012_001	Aspartate aminotransferase	3.24815e-08	1	0.596857	0.978616	40	6	0.866002	0.49279	0.527454	0.963897	0.80868	0.733849	0.869656	0.0716043	0.326974	-0.47744	0.401615	0.620649	0.61548	0.693703	0.899587	0.819639	0.976671	0.302152	-0.3388	0.675389	0.181789	0.759289	0.54765	Ulk3	Not significant
5122	IMPC_CBC_012_001	Aspartate aminotransferase	8.11609e-08	1	0.353229	0.943085	40	6	0.865286	0.209659	0.634311	0.919116	0.440901	0.818252	0.86896	0.0719995	0.66127	0.209162	0.930117	-0.0651631	0.90439	0.973154	0.979538	1.13074	0.833757	0.314886	-0.319844	0.661556	0.516197	-0.594169	0.774551	Ywhaz	Not significant
2061	TCP_TFL_001_001-1	atency to tail flick	0.0440427	1	0.951862	0.990715	29	6	0.260274	0.00771136	0.279453	0.474163	0.0283778	0.530096	0.312009	-0.448964	0.972835	-0.0218442	0.109576	-0.842943	0.98784	0.491758	0.859702	0.966374	0.782377	0.00906384	0.961102	0.0406767	0.811282	0.140003	0.858177	Galc	Not significant
2071	TCP_TFL_001_001-2	atency to tail flick	0.265099	1	0.836729	0.988586	29	6	0.631894	0.293496	0.709216	0.764349	0.514316	0.786119	0.644322	-0.206279	0.564435	-0.302211	0.892955	-0.0999233	0.780872	0.953448	0.876903	0.838965	0.913956	0.451129	0.302295	0.725865	0.171398	0.504583	0.290425	Galc	Not significant
2081	TCP_TFL_001_001-3	atency to tail flick	0.00594764	0.997182	0.626176	0.665296	29	6	0.15505	0.65777	0.218676	0.324195	0.823922	0.473369	0.170585	-0.600913	0.98209	0.0138556	0.0630538	-1.20375	0.98784	0.369241	0.761873	0.992472	0.569844	0.346019	0.346085	0.673184	0.26537	-0.871518	0.404689	Galc	Not significant
2062	TCP_TFL_001_001-1	atency to tail flick	0.978684	1	0.855799	0.979795	29	6	0.303104	0.00579572	0.690477	0.656086	0.0353953	0.890352	0.356453	-0.410039	0.419076	-0.547919	0.613617	-0.244751	0.778935	0.953896	0.838491	0.759353	0.906817	0.0145585	0.794843	0.088911	0.367827	1.09801	0.794844	Gnpda1	Not significant
2072	TCP_TFL_001_001-2	atency to tail flick	0.494444	1	0.715829	0.811461	29	6	0.664903	0.393144	0.816001	0.845041	0.685124	0.924081	0.676368	0.186569	0.606144	0.230318	0.847355	0.15287	0.822623	0.974611	1.08576	1.11006	1.06856	0.393374	0.29145	0.721706	0.872786	0.214002	0.978012	Gnpda1	Not significant
2082	TCP_TFL_001_001-3	atency to tail flick	0.0746417	0.997182	0.77912	0.640364	29	6	0.1434	0.317655	0.347835	0.510862	0.62417	0.822677	0.158493	0.617857	0.231238	0.718825	0.426186	0.529283	0.681753	0.884585	1.25546	1.326	1.20202	0.350381	0.359408	0.708913	0.716625	0.169865	0.954782	Gnpda1	Not significant
2063	TCP_TFL_001_001-1	atency to tail flick	0.316806	0.998225	0.475539	0.139699	28	6	0.445754	0.0600811	0.200579	0.614029	0.230581	0.418856	0.46295	-0.308958	0.933133	-0.0520181	0.304504	-0.565898	0.97697	0.502785	0.963407	1.03883	0.90224	0.0248231	0.659178	0.130551	0.91718	0.145298	0.955304	Lmbrd1	Not significant
2073	TCP_TFL_001_001-2	atency to tail flick	0.206643	1	0.742386	0.955293	29	6	0.591157	0.184954	0.429558	0.705068	0.477517	0.642076	0.6047	0.2312	0.830388	-0.10778	0.432864	0.580868	0.940005	0.621102	1.06632	0.92867	1.19237	0.416182	0.309958	0.771429	0.186691	0.998605	0.579881	Lmbrd1	Not significant
2083	TCP_TFL_001_001-3	atency to tail flick	0.0104497	0.997182	0.925738	0.813444	29	6	0.858859	0.223388	0.674391	0.890204	0.501904	0.784947	0.863934	0.0762215	0.955456	0.0354125	0.840821	0.12993	0.97697	0.925554	1.04784	1.08821	1.01896	0.325035	0.374091	0.765901	0.566328	0.468609	0.834588	Lmbrd1	Not significant
2064	TCP_TFL_001_001-1	atency to tail flick	0.0912827	1	0.77673	0.999983	29	6	0.191988	0.0277237	0.147757	0.407881	0.0946221	0.680203	0.252698	0.506826	0.127252	1.0824	0.935676	-0.0380835	0.522765	0.972973	1.11859	1.30092	0.98382	0.00925863	0.889211	0.039092	0.822739	-0.231272	0.915834	Npc2	Not significant
2074	TCP_TFL_001_001-2	atency to tail flick	0.321391	1	0.656761	0.960019	29	6	0.240895	0.31695	0.451204	0.433536	0.535066	0.791626	0.258397	0.500881	0.521936	0.326143	0.356987	0.684811	0.884658	0.727883	1.1302	1.08832	1.17174	0.469269	0.266581	0.708954	0.497859	0.625248	0.795338	Npc2	Not significant
2084	TCP_TFL_001_001-3	atency to tail flick	0.00207129	0.997182	0.676826	0.554754	29	6	0.106789	0.464646	0.233688	0.284168	0.694756	0.680203	0.120114	-0.678795	0.696913	-0.240879	0.0871177	-1.10371	0.910024	0.394413	0.727211	0.867786	0.611508	0.316619	0.37694	0.627338	0.403396	-0.485895	0.741762	Npc2	Not significant
20610	TCP_TFL_001_001-1	atency to tail flick	0.190594	1	0.994808	0.991916	29	6	0.651424	0.00749954	0.447283	0.853711	0.040959	0.828634	0.670872	-0.189921	0.856283	0.119942	0.36566	-0.467847	0.972738	0.851208	0.955064	1.03759	0.897394	0.00947742	0.926158	0.0585128	0.710056	0.33837	0.884455	Sra1	Not significant
2075	TCP_TFL_001_001-2	atency to tail flick	0.224108	1	0.537541	0.940419	29	6	0.612786	0.31948	0.649095	0.853094	0.587302	0.886894	0.625747	0.21788	0.941459	-0.0375743	0.520714	0.481426	0.982994	0.905717	1.0478	0.961075	1.12872	0.533321	0.234627	0.805655	0.40014	0.753627	0.740478	Sra1	Not significant
2085	TCP_TFL_001_001-3	atency to tail flick	0.00980077	0.996998	0.631428	0.627024	29	6	0.560182	0.249288	0.636963	0.82006	0.528342	0.886753	0.574514	0.249148	0.693189	0.238644	0.685386	0.272262	0.910884	0.920629	1.06146	1.05848	1.06948	0.337423	0.365675	0.70462	0.6055	0.399293	0.836362	Sra1	Not significant
115	IMPC_HEM_037_001	Basophil cell count	9.19027e-11	1.15586e-09	8.51624e-08	1.38338e-05	30	6	0.00362472	0.113194	0.00163345	0.0942428	0.321896	0.074322	0.00500306	0.677531	0.166227	0.291326	0.0115309	1.06374	0.846283	0.149902	11.875	10	12.1429	0.253289	0.157544	0.652448	0.281021	0.929955	0.769285	Ahcy	One sex_Male only
1151	IMPC_HEM_037_001	Basophil cell count	1.80689e-10	3.10592e-10	9.5124e-08	1.53921e-06	30	6	0.141551	0.395843	0.351315	0.264882	0.652914	0.618531	0.156129	0.281195	0.113781	0.390706	0.595315	0.171685	0.287913	0.860987	4.375	20	2.14286	0.25952	0.158768	0.597882	0.925513	-0.0602533	0.964805	Atp6v0d1	Not significant
1152	IMPC_HEM_037_001	Basophil cell count	6.38473e-11	4.01191e-10	1.05747e-08	1.24647e-05	30	6	0.021322	0.0119911	0.00928137	0.0991599	0.0439673	0.215902	0.115683	0.33809	0.668353	-0.066467	0.0498853	0.742646	0.91817	0.336273	5.625	0	6.42857	0.252751	0.164435	0.570571	0.138494	0.973548	0.474471	C8a	One sex_Male only
1153	IMPC_HEM_037_001	Basophil cell count	8.5997e-11	1.05661e-09	8.40553e-08	1.08568e-05	30	6	0.00237643	0.262895	0.0094456	0.0313199	0.569246	0.182615	0.00336928	0.718177	0.0663319	0.55034	0.0254195	0.886014	0.245569	0.243164	13.75	40	10	0.25992	0.15224	0.585687	0.607393	0.487914	0.83038	Cdk4	One sex_Male only
1154	IMPC_HEM_037_001	Basophil cell count	1.39128e-11	3.51827e-10	9.00257e-08	2.75711e-06	30	6	0.0637578	0.267659	0.177248	0.132931	0.503198	0.469333	0.0736879	0.408053	0.146261	0.330453	0.231587	0.485654	0.419042	0.448849	9.375	15	8.57143	0.25952	0.158768	0.58291	0.719408	0.313969	0.937226	Dhfr	Not significant
1155	IMPC_HEM_037_001	Basophil cell count	2.55596e-12	1.28082e-10	1.05747e-08	2.75897e-06	32	6	0.273925	0.0701531	0.161639	0.642613	0.209136	0.481866	0.290266	-0.281573	0.668353	-0.0724658	0.335467	-0.46608	0.865571	0.982945	0	0	0	0.0800424	0.393614	0.31196	NA	NA	NA	Dync1li1	Not significant
1156	IMPC_HEM_037_001	Basophil cell count	4.34779e-12	1.03548e-09	7.57152e-08	1.10685e-05	32	6	0.760131	0.0773055	0.295534	0.879894	0.210545	0.893578	0.76791	0.0846599	0.201096	0.275649	0.874662	-0.0807799	0.530828	0.92843	0.444444	5	0.32381	0.0751164	0.408787	0.243104	0.925443	0.0523584	0.995159	G6pd2	Not significant
1157	IMPC_HEM_037_001	Basophil cell count	1.49787e-11	9.98599e-10	4.66063e-07	2.66576e-06	32	6	0.0216823	0.024216	0.00876342	0.110821	0.0707261	0.0948511	0.402164	0.252592	0.00329852	0.986538	0.340496	-0.457093	0.0505773	0.773472	1.92593	65	0	0.080389	0.388181	0.255027	0.161662	-1.05545	0.287224	Galc	One sex_Female only
1158	IMPC_HEM_037_001	Basophil cell count	2.62645e-11	1.13803e-09	7.52303e-08	1.21694e-05	30	6	0.00449462	0.381062	0.0288114	0.0591215	0.685124	0.492676	0.0061198	0.663104	0.0559435	0.655314	0.0620006	0.670894	0.478317	0.397284	13.75	70	5.71429	0.260265	0.157544	0.664258	0.852391	0.173125	0.978012	Gnpda1	cannot classify
1159	IMPC_HEM_037_001	Basophil cell count	1.25178e-11	3.65274e-10	8.06923e-08	2.63991e-06	32	6	0.782442	0.314064	0.171512	0.88606	0.585599	0.669368	0.789535	0.0786177	0.0618797	0.631065	0.340673	-0.450035	0.221529	0.56237	2.07407	70	0	0.0821752	0.380717	0.271333	0.373901	-0.700383	0.926439	Idh1	Not significant
11510	IMPC_HEM_037_001	Basophil cell count	2.55596e-12	1.28082e-10	1.05747e-08	2.75897e-06	32	6	0.273925	0.0701531	0.161639	0.486217	0.262151	0.376273	0.290266	-0.281573	0.668353	-0.0724658	0.335467	-0.46608	0.89534	0.529292	0	0	0	0.0800424	0.393614	0.334295	NA	NA	NA	Lmbrd1	Not significant
11511	IMPC_HEM_037_001	Basophil cell count	3.04078e-12	3.68946e-10	7.57152e-08	2.77339e-06	32	6	0.695254	0.145027	0.217378	0.988352	0.318619	0.661865	0.704949	-0.105202	0.201096	0.287573	0.33551	-0.472914	0.702405	0.822934	0.148148	5	0	0.0782887	0.40102	0.243565	0.373901	-0.359467	0.688624	Mfap4	Not significant
11512	IMPC_HEM_037_001	Basophil cell count	6.33071e-12	1.03887e-09	5.37782e-07	2.60219e-06	32	6	0.0678384	0.0441577	0.0925139	0.257755	0.138913	0.628726	0.674485	0.12042	0.00489347	0.732822	0.340897	-0.467096	0.240348	0.75569	0.740741	25	0	0.0789763	0.398183	0.23377	0.123904	-0.801734	0.456331	Mmachc	Not significant
11513	IMPC_HEM_037_001	Basophil cell count	3.57322e-12	1.00608e-09	1.05747e-08	3.79648e-05	32	6	0.804277	0.0197407	0.117022	0.88247	0.0663623	0.381738	0.810689	0.0686649	0.668353	-0.0714191	0.646257	0.23428	0.842837	0.79774	0.296296	0	0.32381	0.0766945	0.408492	0.266688	0.116117	0.714191	0.304876	Mvk	Not significant
11514	IMPC_HEM_037_001	Basophil cell count	8.61203e-10	7.65615e-10	1.96677e-06	3.40816e-07	28	6	4.76135e-06	0.00861058	0.00419265	0.000680873	0.032403	0.0999249	0.000139221	0.648584	7.54424e-06	1.03351	0.254606	0.262906	0.00107883	0.894427	11.6667	20	4.33333	0.920094	0.0105162	0.969638	0.0957905	-0.760089	0.402884	Nek2	One sex_Female only
11515	IMPC_HEM_037_001	Basophil cell count	6.58745e-11	1.02259e-09	5.30671e-07	2.67655e-06	30	6	0.00277746	0.612162	0.328725	0.028965	0.851197	0.813455	0.00389898	0.717861	0.00249922	0.935613	0.218503	0.50011	0.0912216	0.69351	13.125	55	7.14286	0.253289	0.157544	0.547885	0.775897	-0.277959	0.952308	Phyh	Genotype effect with no sex effect(real)
11516	IMPC_HEM_037_001	Basophil cell count	3.04078e-12	3.68946e-10	7.57152e-08	2.77339e-06	32	6	0.695254	0.145027	0.217378	0.76478	0.360774	0.419408	0.704949	-0.105202	0.201096	0.287573	0.33551	-0.472914	0.509398	0.496813	0.148148	5	0	0.0782887	0.40102	0.274011	0.373901	-0.359467	0.802222	Pipox	Not significant
11517	IMPC_HEM_037_001	Basophil cell count	3.04078e-12	3.68946e-10	7.57152e-08	2.77339e-06	32	6	0.695254	0.145027	0.217378	0.876371	0.298	0.679306	0.704949	-0.105202	0.201096	0.287573	0.33551	-0.472914	0.636646	0.606651	0.148148	5	0	0.0782887	0.40102	0.238935	0.373901	-0.359467	0.632077	Pmm2	Not significant
11518	IMPC_HEM_037_001	Basophil cell count	2.55596e-12	1.28082e-10	1.05747e-08	2.75897e-06	32	6	0.273925	0.0701531	0.161639	0.482793	0.190223	0.492857	0.290266	-0.281573	0.668353	-0.0724658	0.335467	-0.46608	0.798625	0.598401	0	0	0	0.0800424	0.393614	0.222159	NA	NA	NA	Pttg1	Not significant
11519	IMPC_HEM_037_001	Basophil cell count	2.55596e-12	1.28082e-10	1.05747e-08	2.75897e-06	32	6	0.273925	0.0701531	0.161639	0.842847	0.187075	0.937495	0.290266	-0.281573	0.668353	-0.0724658	0.335467	-0.46608	0.985589	0.831471	0	0	0	0.0800424	0.393614	0.249337	NA	NA	NA	Rock1	Not significant
11520	IMPC_HEM_037_001	Basophil cell count	9.87155e-12	1.04484e-09	1.05747e-08	3.97307e-05	32	6	0.489829	0.0174994	0.0596284	0.755206	0.0776534	0.319883	0.504442	0.196442	0.668353	-0.0689122	0.351412	0.48635	0.903867	0.851208	1.18519	0	1.29524	0.0796447	0.392875	0.342714	0.144911	0.948137	0.474146	Sra1	Not significant
11521	IMPC_HEM_037_001	Basophil cell count	3.04078e-12	3.68946e-10	7.57152e-08	2.77339e-06	32	6	0.695254	0.145027	0.217378	0.847548	0.403387	0.58889	0.704949	-0.105202	0.201096	0.287573	0.33551	-0.472914	0.547666	0.688774	0.148148	5	0	0.0782887	0.40102	0.28796	0.373901	-0.359467	0.664568	Ulk3	Not significant
11522	IMPC_HEM_037_001	Basophil cell count	3.04078e-12	3.68946e-10	1.05747e-08	1.07908e-05	32	6	0.695254	0.0380444	0.217378	0.863455	0.12652	0.779988	0.704949	-0.105202	0.668353	-0.0718933	0.821402	-0.113447	0.90439	0.932272	0.148148	0	0.161905	0.0782887	0.40102	0.304316	0.373901	0.359467	0.647055	Ywhaz	Not significant
116	IMPC_HEM_038_001	Basophil differential count	2.00321e-09	4.83469e-06	2.68595e-05	0.0117165	36	6	0.401392	0.168965	0.269406	0.670214	0.45223	0.86021	0.415748	0.302499	0.824146	-0.107653	0.219979	0.700134	0.961504	0.7111	1.91845	0.431818	3.08672	0.400243	0.225291	0.726311	0.296147	1.03308	0.775976	Ahcy	Not significant
1161	IMPC_HEM_038_001	Basophil differential count	4.21298e-10	9.85158e-07	2.52424e-05	0.00129866	36	6	0.361136	0.728298	0.432403	0.57439	0.865472	0.67619	0.375805	-0.321363	0.804156	0.133621	0.118978	-0.78871	0.896343	0.61389	0.888412	1.98636	0	0.416881	0.222545	0.759319	0.373901	-0.699786	0.700562	Atp5b	Not significant
1162	IMPC_HEM_038_001	Basophil differential count	4.11851e-10	1.03597e-05	8.34173e-05	0.0111416	36	6	0.905716	0.470738	0.878024	0.956315	0.729258	0.959228	0.908549	0.043324	0.746703	0.176937	0.850872	-0.102724	0.837757	0.924223	0.515021	0.690909	0.368564	0.450104	0.223831	0.728543	0.931898	-0.0558287	0.964805	Atp6v0d1	Not significant
1163	IMPC_HEM_038_001	Basophil differential count	5.30526e-10	4.80115e-06	8.23091e-06	0.033551	36	6	0.896003	0.135572	0.196551	0.936048	0.338027	0.567136	0.899124	-0.0473077	0.250869	-0.594804	0.356449	0.488009	0.572104	0.59196	0.72103	0	1.28997	0.447642	0.219228	0.736827	0.00973365	1.30204	0.15006	C8a	Not significant
1164	IMPC_HEM_038_001	Basophil differential count	2.33816e-09	4.83469e-06	2.25332e-05	0.0101141	36	6	0.378517	0.268821	0.519895	0.567776	0.569246	0.896279	0.39307	0.317322	0.808564	0.124763	0.369936	0.497615	0.950231	0.601577	2.11159	1.98636	2.18835	0.408635	0.220807	0.760746	0.571241	0.593659	0.821298	Cdk4	Not significant
1165	IMPC_HEM_038_001	Basophil differential count	8.74995e-10	2.19188e-06	2.75917e-05	0.00399882	36	6	0.868947	0.406063	0.867627	0.902552	0.671327	0.926783	0.872868	-0.0590457	0.900592	-0.0645285	0.906461	-0.0651446	0.949512	0.935715	1.17167	0.748485	1.49729	0.449394	0.208473	0.737636	0.823248	0.207857	0.939819	Dhfr	Not significant
1166	IMPC_HEM_038_001	Basophil differential count	1.51273e-10	2.13753e-06	2.70086e-05	0.00420826	36	6	0.373671	0.459212	0.68802	0.787201	0.741048	0.898991	0.38826	-0.316754	0.687477	-0.212416	0.419993	-0.433366	0.883101	0.982945	0.0772532	0.0863636	0.0691057	0.44461	0.220951	0.77679	1	9.06493e-17	1	Dync1li1	Not significant
1167	IMPC_HEM_038_001	Basophil differential count	2.69317e-10	4.76656e-06	8.91219e-05	0.00440364	36	6	0.808114	0.564829	0.841979	0.897859	0.803795	0.963115	0.813797	-0.0878638	0.788305	0.143118	0.548157	-0.330781	0.907281	0.811272	0.321888	0.316667	0.322493	0.461823	0.214825	0.741419	0.698541	-0.259073	0.995159	G6pd2	Not significant
1168	IMPC_HEM_038_001	Basophil differential count	5.34314e-10	2.18533e-06	8.16372e-05	0.00126176	36	6	0.750904	0.926266	0.287705	0.858176	0.954247	0.538287	0.758183	-0.113545	0.30916	0.549476	0.123416	-0.788589	0.538194	0.510665	0.965665	2.15909	0	0.43603	0.216422	0.723426	0.143992	-1.12164	0.273378	Galc	Not significant
1169	IMPC_HEM_038_001	Basophil differential count	8.51732e-10	4.83469e-06	2.63357e-05	0.0123846	36	6	0.532893	0.379381	0.763952	0.783826	0.685124	0.907413	0.545326	0.22522	0.648518	0.248664	0.722064	0.189138	0.870785	0.971718	2.11159	3.25303	1.1748	0.404098	0.227471	0.727376	0.868378	0.167944	0.978012	Gnpda1	Not significant
11610	IMPC_HEM_038_001	Basophil differential count	4.21267e-10	9.85158e-07	2.52424e-05	0.00129866	36	6	0.432944	0.728298	0.409897	0.569831	0.931271	0.797517	0.446954	-0.276312	0.678498	0.223045	0.118978	-0.78871	0.861802	0.332766	1.12017	2.50455	0	0.383889	0.234739	0.658061	0.373901	-0.777016	0.926439	Idh1	Not significant
11611	IMPC_HEM_038_001	Basophil differential count	1.31607e-10	4.38598e-07	8.05382e-06	0.00143182	36	6	0.0423364	0.444178	0.175013	0.150294	0.670785	0.39114	0.0489497	-0.691876	0.245278	-0.583814	0.11546	-0.812651	0.738005	0.349991	0	0	0	0.41448	0.228837	0.771429	NA	NA	NA	Lmbrd1	Genotype effect with no sex effect(real)
11612	IMPC_HEM_038_001	Basophil differential count	4.72243e-10	1.04631e-05	7.78571e-05	0.00922541	36	6	0.635855	0.584101	0.829584	0.792649	0.766066	0.900556	0.646081	0.173001	0.485003	0.387359	0.922343	-0.0525104	0.732354	0.994813	0.618026	1.1803	0.161247	0.49546	0.200767	0.718902	0.725305	-0.239103	0.881898	Mmachc	Not significant
11613	IMPC_HEM_038_001	Basophil differential count	4.31443e-10	1.05477e-05	0.0002514	0.00335608	36	6	0.620069	0.903562	0.376085	0.852595	0.9363	0.732618	0.630664	0.181131	0.146657	0.78058	0.430385	-0.429536	0.556107	0.894427	0.540773	1.03636	0.138211	0.493357	0.201933	0.776895	0.0613986	-1.00818	0.314625	Nek2	Not significant
11614	IMPC_HEM_038_001	Basophil differential count	1.86357e-10	1.04189e-05	8.69876e-05	0.0110412	36	6	0.939671	0.508541	0.873257	0.946544	0.642141	0.949746	0.941489	0.0276864	0.706103	0.206388	0.765442	-0.16333	0.958438	0.924213	0.180258	0.259091	0.115176	0.457846	0.22166	0.672192	0.803044	-0.148058	0.927547	Pebp1	Not significant
11615	IMPC_HEM_038_001	Basophil differential count	1.66518e-10	9.8206e-07	2.73195e-05	0.00138314	36	6	0.167464	0.618677	0.379481	0.265871	0.874094	0.521787	0.180645	-0.482663	0.750486	-0.166114	0.119989	-0.811558	0.882571	0.263976	0.103004	0.230303	0	0.433955	0.222221	0.768571	0.373901	-0.423222	0.802222	Pipox	Not significant
11616	IMPC_HEM_038_001	Basophil differential count	1.51438e-10	4.73553e-06	8.78887e-05	0.00406131	36	6	0.510348	0.596323	0.658374	0.696173	0.823637	0.821511	0.523192	-0.23761	0.86758	0.0895623	0.285699	-0.577725	0.929279	0.547005	0.0772532	0.143939	0.0230352	0.429745	0.232952	0.708213	0.404539	-0.434335	0.735876	Pttg1	Not significant
11617	IMPC_HEM_038_001	Basophil differential count	1.5659e-10	4.64322e-06	8.76476e-05	0.00431562	36	6	0.657721	0.57614	0.784483	0.926134	0.777723	0.937495	0.66742	-0.160084	0.852473	0.0993999	0.429985	-0.431775	0.985589	0.831471	0.103004	0.143939	0.0691057	0.455182	0.219744	0.729753	0.594319	-0.311432	0.85269	Rock1	Not significant
11618	IMPC_HEM_038_001	Basophil differential count	5.03986e-10	2.18533e-06	8.52947e-06	0.0128865	36	6	0.681767	0.164757	0.308216	0.87217	0.389924	0.701888	0.690867	-0.146609	0.249741	-0.572167	0.627002	0.26637	0.544827	0.905717	0.798283	0	1.42818	0.419562	0.226425	0.739204	0.136668	1.06496	0.474146	Sra1	Not significant
11619	IMPC_HEM_038_001	Basophil differential count	1.61207e-10	1.02688e-05	2.64417e-05	0.026433	36	6	0.898923	0.274432	0.695102	0.925078	0.510164	0.841357	0.901957	-0.0464543	0.681942	-0.224621	0.824316	0.118956	0.90439	0.932272	0.11588	0.0863636	0.138211	0.443532	0.229621	0.746177	0.262081	0.573197	0.611871	Ywhaz	Not significant
122	IMPC_IPG_002_001-0	Blood glucose concentration	0.0407914	0.989973	0.909265	0.998405	35	6	0.00516806	0.0284257	0.00184795	0.0665086	0.0965289	0.0334684	0.00672497	1.13163	0.0947073	0.847245	0.0169047	1.4652	0.514576	0.211959	1.23081	1.14337	1.31998	0.0582277	0.573902	0.25232	0.0888415	1.19185	0.338922	A2m	One sex_Male only
123	IMPC_IPG_002_001-120	Blood glucose concentration	0.109193	0.938589	0.679599	0.268488	34	6	0.0232653	3.19466e-09	0.0128329	0.151689	4.73391e-08	0.149412	0.517107	0.268361	0.451069	-0.332328	0.00516382	0.937531	0.890249	0.150591	1.09001	0.907243	1.24357	2.71257e-06	1.16416	3.52634e-05	0.00330283	2.43402	0.0767043	A2m	One sex_Male only
124	IMPC_IPG_002_001-15	Blood glucose concentration	0.638549	0.999999	0.727779	0.698872	35	6	0.272871	0.0504812	0.0868903	0.647913	0.158239	0.442598	0.287972	0.464436	0.956272	0.0355059	0.0993493	0.932489	0.986562	0.584462	1.05246	0.997017	1.10969	0.18017	0.456428	0.540509	0.0174673	1.35341	0.140788	A2m	Not significant
125	IMPC_IPG_002_001-30	Blood glucose concentration	0.168376	1	0.980496	0.980347	35	6	0.444602	1.33124e-06	0.350801	0.783751	9.86331e-06	0.802279	0.495796	-0.299217	0.255706	-0.544469	0.921155	0.0476147	0.757819	0.974989	0.958604	0.899014	1.02294	8.65232e-05	1.18509	0.000586853	0.00768391	1.77717	0.0894627	A2m	Not significant
126	IMPC_IPG_002_001-60	Blood glucose concentration	0.210101	1	1	0.890621	35	6	0.518592	4.23464e-08	0.546446	0.805052	4.93033e-07	0.842528	0.766687	0.130673	0.980509	0.0111267	0.400776	0.365812	0.986562	0.837519	1.0352	0.976697	1.10217	5.30397e-06	1.34859	5.18582e-05	0.00188791	1.70328	0.0767043	A2m	Not significant
1221	IMPC_IPG_002_001-0	Blood glucose concentration	0.518446	0.999772	0.991238	0.999001	35	6	0.216853	0.0323088	0.801088	0.493341	0.140005	0.959047	0.232868	-0.519328	0.500024	-0.392014	0.33873	-0.591179	0.875043	0.753351	0.920493	0.944199	0.906665	0.0480023	0.64706	0.215485	0.624509	0.447894	0.927441	Ahcy	Not significant
1231	IMPC_IPG_002_001-120	Blood glucose concentration	0.00425862	0.992746	0.834865	0.30471	34	6	0.142703	2.61362e-09	0.878104	0.425769	4.75679e-08	0.959047	0.482439	0.309102	0.370566	0.355585	0.295461	0.437622	0.861375	0.743946	1.05016	1.08607	1.0606	1.81144e-07	1.48752	2.97858e-06	0.0191354	1.56956	0.293957	Ahcy	Not significant
1241	IMPC_IPG_002_001-15	Blood glucose concentration	0.647076	1	0.998858	0.899354	35	6	0.681324	0.312409	0.401538	0.891345	0.638858	0.903226	0.690662	-0.175093	0.575964	0.39852	0.197188	-0.708992	0.899711	0.7111	0.982235	1.05982	0.913014	0.160824	0.463315	0.498378	0.545231	-0.644197	0.893983	Ahcy	Not significant
1251	IMPC_IPG_002_001-30	Blood glucose concentration	0.366038	1	0.91245	0.976722	35	6	0.505858	2.37103e-05	0.310865	0.760878	0.000172611	0.903226	0.685271	0.17837	0.262848	0.576416	0.827169	-0.111854	0.853444	0.946449	1.03186	1.11528	0.98456	8.48309e-05	1.25791	0.000618559	0.285259	0.569643	0.769285	Ahcy	Not significant
1261	IMPC_IPG_002_001-60	Blood glucose concentration	0.283544	1	0.999637	0.969163	35	6	0.105651	4.7483e-07	0.638744	0.369777	4.54837e-06	0.959047	0.312085	0.442452	0.166772	0.643503	0.439574	0.358734	0.846283	0.833359	1.10348	1.13818	1.10495	4.90905e-06	1.3689	5.24124e-05	0.0686295	1.08413	0.432096	Ahcy	Not significant
1222	IMPC_IPG_002_001-0	Blood glucose concentration	0.0707243	0.998335	0.974406	0.999712	34	6	0.665192	0.00321607	0.466459	0.818697	0.0190582	0.67619	0.749913	0.134194	0.831039	-0.109207	0.469953	0.420971	0.898421	0.857444	1.02526	0.973717	1.07776	0.0168788	0.737405	0.103298	0.179312	1.26758	0.58551	Atp5b	Not significant
1232	IMPC_IPG_002_001-120	Blood glucose concentration	0.000391413	0.993485	0.796951	0.819371	35	6	0.919054	1.03628e-07	0.932567	0.954862	1.50732e-06	0.952093	0.949446	-0.0277556	0.991772	0.00479162	0.900165	0.0556477	0.996832	0.97343	1.03702	0.989713	1.09564	1.38168e-06	1.35276	1.76165e-05	0.150961	1.40361	0.570924	Atp5b	Not significant
1242	IMPC_IPG_002_001-15	Blood glucose concentration	0.851796	0.999999	0.979341	0.836914	35	6	0.642669	0.17998	0.479139	0.815533	0.457092	0.67619	0.652983	0.197681	0.472051	0.485864	0.933172	-0.0489785	0.638108	0.975866	1.01458	1.0484	0.986998	0.173863	0.484439	0.532021	0.91424	-0.0504035	0.956068	Atp5b	Not significant
1252	IMPC_IPG_002_001-30	Blood glucose concentration	0.12183	1	0.978357	0.965286	35	6	0.726713	1.2049e-06	0.614449	0.861289	1.01466e-05	0.723403	0.704862	-0.166715	0.571655	-0.274876	0.921837	0.0469962	0.716942	0.97343	0.973462	0.925742	1.02869	6.61332e-05	1.23142	0.000595198	0.00546356	1.5533	0.156076	Atp5b	Not significant
1262	IMPC_IPG_002_001-60	Blood glucose concentration	0.00306323	1	0.999998	0.903268	35	6	0.166545	3.32776e-08	0.229595	0.370099	6.65552e-07	0.536589	0.435658	0.34208	0.901451	0.0557044	0.0793556	0.740868	0.942694	0.520373	1.15587	0.969014	1.31817	2.89702e-06	1.31147	3.40957e-05	0.0109406	1.99663	0.156298	Atp5b	Not significant
1223	IMPC_IPG_002_001-0	Blood glucose concentration	0.445698	0.999899	0.929106	0.939686	35	6	0.00115649	0.0415381	0.0317161	0.0128575	0.137732	0.333019	0.00407625	-1.19799	0.414198	-0.389684	0.00277002	-1.95609	0.592838	0.047594	0.824476	0.93683	0.729741	0.0530633	0.585831	0.222701	0.157574	-0.980573	0.550478	Atp6v0d1	One sex_Male only
1233	IMPC_IPG_002_001-120	Blood glucose concentration	0.000644238	0.993439	0.538612	0.49564	35	6	0.374397	1.60159e-07	0.165492	0.540161	1.59316e-06	0.580369	0.455071	-0.325901	0.75827	0.149071	0.108035	-0.675621	0.841495	0.44944	0.893911	0.982885	0.849998	1.24688e-06	1.46127	1.26074e-05	0.115974	0.636575	0.550478	Atp6v0d1	Not significant
1243	IMPC_IPG_002_001-15	Blood glucose concentration	0.884224	0.999999	0.974466	0.790279	35	6	0.405719	0.223736	0.353446	0.56383	0.475125	0.618531	0.42039	0.353246	0.241418	0.786174	0.949084	-0.0373509	0.426584	0.974874	1.03766	1.09215	0.990586	0.164665	0.493854	0.447298	0.386321	-0.329671	0.722917	Atp6v0d1	Not significant
1253	IMPC_IPG_002_001-30	Blood glucose concentration	0.32359	1	0.678927	0.777821	35	6	0.0227628	4.73456e-05	0.00596239	0.0977767	0.000255666	0.112689	0.88365	-0.0644737	0.0693992	0.955461	0.0667	-0.975296	0.233325	0.352965	0.984746	1.1906	0.839883	7.38188e-05	1.27298	0.000447834	0.160616	-0.657775	0.550478	Atp6v0d1	cannot classify
1263	IMPC_IPG_002_001-60	Blood glucose concentration	0.27665	1	0.999811	0.978556	35	6	0.865581	1.78702e-06	0.0925315	0.934827	1.10412e-05	0.546514	0.999206	0.000438164	0.218717	0.596132	0.319051	-0.473162	0.414129	0.70117	0.987475	1.13818	0.902621	3.58601e-06	1.42443	2.88777e-05	0.531748	0.355132	0.79132	Atp6v0d1	Not significant
1224	IMPC_IPG_002_001-0	Blood glucose concentration	0.0793565	0.982946	0.989459	0.994771	35	6	0.366179	0.0679859	0.295701	0.548008	0.189752	0.677452	0.371554	-0.388807	0.914577	0.0579654	0.235213	-0.779623	0.988219	0.49578	0.931465	0.989517	0.886685	0.05861	0.652822	0.222479	0.718569	-0.184767	0.916795	C8a	Not significant
1234	IMPC_IPG_002_001-120	Blood glucose concentration	0.00197942	0.983922	0.471636	0.160322	35	6	0.726906	2.09718e-08	0.33152	0.854914	2.06407e-07	0.677452	0.926213	0.0404934	0.689119	-0.181335	0.3657	0.376055	0.920466	0.601949	0.985907	0.942424	1.04055	3.80987e-06	1.32688	2.95265e-05	0.00403804	1.88427	0.10672	C8a	Not significant
1244	IMPC_IPG_002_001-15	Blood glucose concentration	0.620235	0.999999	0.883914	0.801063	35	6	0.509933	0.0588721	0.188365	0.706352	0.170938	0.567136	0.523105	0.280397	0.967542	-0.0267102	0.272698	0.627727	0.988219	0.51368	1.02907	0.988818	1.0718	0.176333	0.469271	0.455526	0.0481272	1.12371	0.240636	C8a	Not significant
1254	IMPC_IPG_002_001-30	Blood glucose concentration	0.307831	1	0.965609	0.956259	35	6	0.0127702	1.94261e-07	0.021783	0.0835248	1.65122e-06	0.254589	0.145548	-0.632569	0.00277641	-1.26163	0.850649	0.0896822	0.154494	0.93646	0.905898	0.758948	1.03829	7.86681e-05	1.08725	0.000434597	0.000565605	2.43856	0.0523184	C8a	One sex_Female only
1264	IMPC_IPG_002_001-60	Blood glucose concentration	0.218101	1	1	0.870305	35	6	0.914547	5.40684e-08	0.832887	0.944863	5.0554e-07	0.948259	0.950054	-0.0275999	0.945256	-0.0316631	0.830419	0.0940009	0.988219	0.93646	0.969	0.94326	1.01078	4.87825e-06	1.37127	3.48982e-05	0.00543938	1.49694	0.116082	C8a	Not significant
1225	IMPC_IPG_002_001-0	Blood glucose concentration	0.00209606	0.987513	0.953618	0.995301	35	6	0.144651	0.0075501	0.00365359	0.301234	0.0320419	0.105954	0.157474	0.61044	0.912023	-0.0557022	0.0293474	1.32624	0.950251	0.243164	1.15758	0.981086	1.32664	0.0577789	0.579394	0.214822	0.0327318	1.96134	0.286138	Cdk4	Interaction_One sex_Male only2
1235	IMPC_IPG_002_001-120	Blood glucose concentration	0.00195372	0.988472	0.611887	0.173238	35	6	0.579853	1.9317e-08	0.322715	0.715563	1.86731e-07	0.797304	0.82105	0.0989402	0.779663	-0.126802	0.288808	0.438705	0.948681	0.567273	1.02844	0.948478	1.11063	2.83444e-06	1.33026	2.28105e-05	0.00919475	1.89577	0.282016	Cdk4	Not significant
1245	IMPC_IPG_002_001-15	Blood glucose concentration	0.677935	0.999999	0.887756	0.744897	35	6	0.983556	0.117615	0.477889	0.983556	0.305447	0.896279	0.984065	-0.00879303	0.891687	0.0909214	0.909711	-0.0665368	0.950251	0.953552	0.998866	1.01034	0.992406	0.163429	0.489658	0.424917	0.608544	0.3322	0.83038	Cdk4	Not significant
1255	IMPC_IPG_002_001-30	Blood glucose concentration	0.0817378	1	0.955714	0.999844	35	6	0.371052	1.69352e-06	0.558827	0.561417	1.17869e-05	0.896279	0.596356	0.232935	0.837225	0.0985599	0.332707	0.471814	0.950251	0.573179	1.05628	1.01079	1.11123	7.34461e-05	1.21921	0.000413746	0.00557872	1.59246	0.282016	Cdk4	Not significant
1265	IMPC_IPG_002_001-60	Blood glucose concentration	0.0627127	0.97654	0.999999	0.829421	34	6	0.0720673	4.04585e-08	0.102829	0.191658	3.68029e-07	0.616973	0.27752	0.450083	0.897736	0.0578274	0.0109201	0.913471	0.950251	0.118756	1.13109	0.976697	1.26198	5.52771e-06	1.20927	4.18852e-05	0.000243834	2.06491	0.0424271	Cdk4	Not significant
1228	IMPC_IPG_002_001-0	Blood glucose concentration	0.223919	0.999349	0.963725	0.999878	34	6	0.238912	0.00472636	0.606002	0.401488	0.0182162	0.942104	0.329884	0.408133	0.660127	0.242756	0.264804	0.616761	0.836462	0.655139	1.0668	1.04008	1.09745	0.0153565	0.73528	0.0607436	0.263425	1.10928	0.786026	G6pd2	Not significant
1236	IMPC_IPG_002_001-120	Blood glucose concentration	0.121852	0.944562	0.56835	0.172079	33	6	0.00240809	3.06372e-07	0.840913	0.0222748	2.36033e-06	0.963115	0.0594273	0.771139	0.0865167	0.777877	0.0197566	0.881284	0.347948	0.281151	1.16071	1.22005	1.14511	5.79768e-07	1.28571	5.15993e-06	0.0944002	1.38912	0.458973	G6pd2	Genotype effect with no sex effect(real)
1246	IMPC_IPG_002_001-15	Blood glucose concentration	0.588408	0.999998	0.885805	0.777873	35	6	0.134677	0.084255	0.11421	0.289712	0.225336	0.841162	0.147145	0.629577	0.536677	0.40526	0.116234	0.892891	0.776583	0.57678	1.07277	1.05028	1.09886	0.175884	0.45496	0.430798	0.182293	0.942591	0.664642	G6pd2	Not significant
1256	IMPC_IPG_002_001-30	Blood glucose concentration	0.20964	1	0.9528	0.983107	35	6	0.784377	3.02534e-06	0.890313	0.895739	1.80544e-05	0.986655	0.934626	0.0361345	0.783482	0.135222	0.927504	0.0450043	0.907281	0.958594	1.00637	1.01807	1.01526	5.48543e-05	1.25951	0.000295881	0.0602069	1.16929	0.384078	G6pd2	Not significant
1266	IMPC_IPG_002_001-60	Blood glucose concentration	0.181611	1	0.995351	0.956417	35	6	0.0574416	4.58234e-07	0.790497	0.174208	3.02761e-06	0.963115	0.228775	0.525175	0.283969	0.501565	0.147898	0.660745	0.610864	0.57678	1.13522	1.13434	1.16307	5.57045e-06	1.3062	3.67237e-05	0.0673883	1.46538	0.402156	G6pd2	Not significant
12210	IMPC_IPG_002_001-0	Blood glucose concentration	0.180733	0.999908	0.987657	0.999806	35	6	0.00147961	1.18997e-05	0.000345665	0.0266593	6.63497e-05	0.0106004	0.747107	0.141622	0.0261544	-1.0871	0.0112019	1.41534	0.12031	0.184367	1.07741	0.804061	1.33334	0.0571617	0.524878	0.202264	0.00386078	3.02732	0.0485325	Galc	Different direction
1237	IMPC_IPG_002_001-120	Blood glucose concentration	0.00521625	0.999249	0.294258	0.15418	33	6	0.274271	4.25873e-10	0.718694	0.475925	6.02774e-09	0.791855	0.36515	-0.402593	0.282406	-0.380467	0.643765	-0.194147	0.523486	0.885672	0.911901	0.939147	0.935518	1.39151e-08	1.52178	3.65769e-07	0.079108	1.7081	0.198312	Galc	Not significant
1247	IMPC_IPG_002_001-15	Blood glucose concentration	0.447063	1	0.807097	0.697607	35	6	0.584172	0.0647198	0.256325	0.731208	0.169554	0.502293	0.59585	-0.233171	0.479689	-0.461682	0.951253	0.0355953	0.706102	0.972786	0.984076	0.955158	1.01586	0.151293	0.469643	0.41549	0.364315	0.96692	0.505073	Galc	Not significant
1257	IMPC_IPG_002_001-30	Blood glucose concentration	0.154765	1	0.952795	0.983912	35	6	0.19312	3.02155e-06	0.359574	0.387871	1.98559e-05	0.596051	0.401387	0.367939	0.79849	0.125657	0.139739	0.710263	0.906927	0.535667	1.05309	1.02052	1.09779	6.38741e-05	1.16714	0.000379124	0.0531216	1.75175	0.164767	Galc	Not significant
1267	IMPC_IPG_002_001-60	Blood glucose concentration	0.201433	1	0.999608	0.971827	35	6	0.702098	3.43585e-06	0.04452	0.822841	2.17999e-05	0.220966	0.869662	0.0722698	0.109298	0.776307	0.289887	-0.50912	0.304708	0.701433	1.00505	1.17666	0.905561	2.6912e-06	1.43089	2.25083e-05	0.815974	0.145464	0.85818	Galc	Interaction_cannot classify2
12211	IMPC_IPG_002_001-0	Blood glucose concentration	0.774592	0.99994	0.981724	0.993282	35	6	0.0185407	0.0736733	0.0236535	0.1585	0.273872	0.492676	0.0224902	-0.970496	0.191225	-0.666264	0.0627291	-1.22402	0.630599	0.397284	0.861202	0.899943	0.833295	0.0517563	0.591635	0.236672	0.973805	0.033882	0.99722	Gnpda1	cannot classify
1238	IMPC_IPG_002_001-120	Blood glucose concentration	0.0104691	0.999934	0.775305	0.232227	34	6	0.00256547	8.04168e-07	0.387929	0.036558	8.59455e-06	0.822677	0.0221752	-0.975419	0.0886047	-0.653552	0.0208502	-1.13772	0.541122	0.297115	0.794785	0.853341	0.780422	1.5059e-07	1.35635	3.17378e-06	0.385704	0.872191	0.794844	Gnpda1	Genotype effect with no sex effect(real)
1248	IMPC_IPG_002_001-15	Blood glucose concentration	0.912774	1	0.929599	0.737417	35	6	0.0862655	0.0377792	0.166006	0.389081	0.170006	0.784356	0.0964232	-0.719256	0.0552546	-1.23585	0.762301	-0.165519	0.478317	0.971718	0.912009	0.839093	0.985196	0.168103	0.43333	0.518412	0.119852	1.50366	0.637908	Gnpda1	Not significant
1258	IMPC_IPG_002_001-30	Blood glucose concentration	0.4024	1	0.927272	0.966443	35	6	0.44902	1.32182e-05	0.422699	0.746668	0.000125573	0.822677	0.485995	-0.306007	0.293694	-0.527885	0.98482	0.00972468	0.72785	0.990613	0.92994	0.899014	0.971118	6.53726e-05	1.09496	0.000588353	0.203397	1.63257	0.652406	Gnpda1	Not significant
1268	IMPC_IPG_002_001-60	Blood glucose concentration	0.201407	0.997855	0.968752	0.984425	35	6	0.436753	2.84672e-07	0.996417	0.746668	4.05658e-06	0.996417	0.49901	-0.295472	0.601912	-0.240189	0.60981	-0.237441	0.822623	0.953896	0.951049	0.980538	0.952622	3.88156e-06	1.322	4.74105e-05	0.145938	1.32475	0.649664	Gnpda1	Not significant
12212	IMPC_IPG_002_001-0	Blood glucose concentration	0.0871571	0.998206	0.971211	0.997482	34	6	0.923822	0.00613756	0.917036	0.971505	0.0249687	0.969675	0.975281	0.0130419	0.889821	0.0744811	0.996113	-0.00282683	0.975794	0.996113	0.996589	1.00858	0.992304	0.0153947	0.774697	0.0657091	0.396807	0.697389	0.926439	Idh1	Not significant
12310	IMPC_IPG_002_001-120	Blood glucose concentration	0.00103546	0.984011	0.938058	0.38948	33	6	0.0238931	3.39738e-09	0.0196231	0.0750326	4.41095e-08	0.41741	0.513854	0.290032	0.00318737	1.04669	0.635472	-0.212243	0.0438876	0.750039	1.09772	1.26133	1.03556	2.92505e-09	1.67895	1.14869e-07	0.578266	0.420014	0.942588	Idh1	One sex_Female only
1249	IMPC_IPG_002_001-15	Blood glucose concentration	0.068133	0.999999	0.991843	0.985106	35	6	0.263154	0.0237038	0.014866	0.410779	0.0848594	0.41741	0.278197	0.47381	0.67885	-0.25284	0.0277637	1.2394	0.861802	0.144593	1.08092	0.954782	1.20533	0.157135	0.454325	0.394469	0.0152704	1.94657	0.64689	Idh1	Interaction_One sex_Male only2
1259	IMPC_IPG_002_001-30	Blood glucose concentration	0.120311	1	0.933541	0.957312	35	6	0.365701	3.32393e-06	0.210795	0.507445	2.12494e-05	0.669368	0.582194	0.241903	0.82088	-0.112465	0.148889	0.692966	0.962203	0.372971	1.04949	0.95883	1.14001	8.75316e-05	1.12812	0.000464183	0.0532617	1.93355	0.680989	Idh1	Not significant
1269	IMPC_IPG_002_001-60	Blood glucose concentration	0.139745	1	1	0.869243	35	6	0.25112	5.17887e-08	0.442178	0.401344	5.1501e-07	0.833157	0.5257	0.278902	0.807493	0.111702	0.193609	0.560254	0.958352	0.454286	1.05233	0.998927	1.11603	2.31986e-06	1.33176	1.6239e-05	0.0396434	1.78031	0.64689	Idh1	Not significant
12213	IMPC_IPG_002_001-0	Blood glucose concentration	0.782575	0.999913	0.96893	0.995967	35	6	0.245681	0.082032	0.153108	0.539755	0.208826	0.665748	0.26058	-0.490645	0.885025	-0.0782058	0.20028	-0.850005	0.929917	0.513136	0.928835	0.988455	0.882618	0.0472013	0.619261	0.169441	0.89919	-0.152538	0.938004	Iqgap1	Not significant
12311	IMPC_IPG_002_001-120	Blood glucose concentration	0.000822006	0.989821	0.583145	0.685164	34	6	0.305491	8.93262e-07	0.0593058	0.621754	5.63144e-06	0.590404	0.364241	-0.396681	0.548076	0.263219	0.0653345	-0.884201	0.881718	0.332226	0.910606	1.06489	0.832292	4.56044e-07	1.46523	3.36032e-06	0.698955	0.317811	0.844571	Iqgap1	Not significant
12410	IMPC_IPG_002_001-15	Blood glucose concentration	0.762997	1	0.7758	0.800852	35	6	0.811123	0.127658	0.402774	0.8648	0.268266	0.692068	0.816858	-0.101969	0.531876	-0.398208	0.713148	0.225201	0.881718	0.879827	0.99786	0.966573	1.03195	0.22748	0.360859	0.522086	0.506467	0.984268	0.75709	Iqgap1	Not significant
12510	IMPC_IPG_002_001-30	Blood glucose concentration	0.165415	1	0.688689	0.603342	35	6	0.727962	0.000385202	0.297108	0.844436	0.00164277	0.692068	0.699459	-0.169939	0.574605	0.256367	0.413973	-0.501464	0.881718	0.710586	0.997248	1.07881	0.950785	8.62318e-05	1.10578	0.000402415	0.799157	0.347948	0.905295	Iqgap1	Not significant
12610	IMPC_IPG_002_001-60	Blood glucose concentration	0.142133	1	0.999982	0.999972	35	6	0.803133	1.18155e-06	0.244435	0.862625	7.10576e-06	0.665748	0.759686	-0.134659	0.536958	0.29429	0.354901	-0.444564	0.881718	0.677573	0.935182	1.05361	0.872323	3.81932e-06	1.38885	2.22793e-05	0.389579	0.649993	0.690237	Iqgap1	Not significant
12214	IMPC_IPG_002_001-0	Blood glucose concentration	0.722231	0.999473	0.981424	0.978128	35	6	0.444356	0.145404	0.136599	0.614029	0.412949	0.364058	0.458566	-0.324225	0.422179	0.38832	0.161081	-0.982877	0.738005	0.368928	0.955345	1.05486	0.873291	0.0484292	0.628747	0.221837	0.506628	-0.742451	0.788088	Lmbrd1	Not significant
12312	IMPC_IPG_002_001-120	Blood glucose concentration	0.000931937	0.991241	0.511837	0.166955	34	6	0.223614	9.53458e-08	0.075439	0.434974	1.69239e-06	0.364058	0.313183	-0.44033	0.729286	0.160062	0.0390886	-0.861569	0.935082	0.243502	0.895204	1.04372	0.820459	1.47185e-07	1.52281	2.98575e-06	0.461587	0.50118	0.778581	Lmbrd1	Not significant
12411	IMPC_IPG_002_001-15	Blood glucose concentration	0.484223	0.999999	0.818884	0.615368	35	6	0.738813	0.151455	0.499058	0.800851	0.421698	0.705201	0.746609	-0.142146	0.909462	0.0754387	0.592337	-0.318274	0.97697	0.778813	0.982235	1.00653	0.963545	0.166948	0.483663	0.562591	0.895906	0.0899502	0.955304	Lmbrd1	Not significant
12511	IMPC_IPG_002_001-30	Blood glucose concentration	0.114022	1	0.996863	0.929106	35	6	0.0194002	0.000132939	0.0650009	0.121262	0.000943865	0.364058	0.0689217	0.784421	0.00575866	1.45485	0.675865	0.216746	0.164848	0.83244	1.16561	1.33638	1.05172	8.26476e-05	1.19879	0.000651998	0.951279	-0.0393104	0.97211	Lmbrd1	Genotype effect with no sex effect(real)
12611	IMPC_IPG_002_001-60	Blood glucose concentration	0.330799	1	0.160601	0.970132	35	6	0.00553133	5.63722e-06	0.154498	0.0655462	5.33657e-05	0.376273	0.0432806	0.867369	0.0182928	1.3657	0.238686	0.47929	0.264846	0.431244	1.21462	1.39199	1.11601	3.38906e-06	1.28624	4.65497e-05	0.670437	0.399836	0.853283	Lmbrd1	Genotype effect with no sex effect(real)
12215	IMPC_IPG_002_001-0	Blood glucose concentration	0.503746	0.999838	0.990334	0.999774	35	6	0.00180453	1.37864e-05	0.000522369	0.032707	6.66341e-05	0.0378717	0.452559	-0.328724	0.00163127	-1.50847	0.107575	0.898314	0.0788449	0.769861	0.979766	0.781954	1.16662	0.0464981	0.551759	0.171309	0.00325914	2.95854	0.061391	Mfap4	One sex_Female only
12313	IMPC_IPG_002_001-120	Blood glucose concentration	0.0226759	0.999993	0.960208	0.241675	34	6	0.00727893	9.87068e-10	0.0202741	0.097544	1.4124e-08	0.376655	0.129402	-0.661632	0.000932645	-1.18213	0.983047	0.00902058	0.0788449	0.999803	0.863658	0.754628	0.97053	2.24218e-07	1.27632	2.4984e-06	0.0166651	2.46747	0.13558	Mfap4	One sex_Female only
12412	IMPC_IPG_002_001-15	Blood glucose concentration	0.691638	0.999983	0.868852	0.788614	35	6	0.94076	0.0512063	0.20884	0.998392	0.142787	0.661865	0.942589	0.0316658	0.660343	-0.291333	0.483733	0.395428	0.816667	0.822934	0.998866	0.957069	1.04293	0.168542	0.475575	0.398399	0.0756157	1.16234	0.313265	Mfap4	Not significant
12512	IMPC_IPG_002_001-30	Blood glucose concentration	0.314182	1	0.986841	0.912115	35	6	0.0226898	7.05934e-07	0.020781	0.164501	4.65275e-06	0.376655	0.222547	-0.532293	0.00841452	-1.19664	0.644606	0.220934	0.11066	0.873532	0.92145	0.796972	1.03637	7.80944e-05	1.03696	0.000377007	0.0295231	2.45453	0.164648	Mfap4	One sex_Female only
12612	IMPC_IPG_002_001-60	Blood glucose concentration	0.296803	1	1	0.905787	35	6	0.00845608	4.09147e-08	0.061555	0.097544	3.29591e-07	0.493825	0.0530928	-0.831948	0.0015753	-1.2974	0.556228	-0.265349	0.0788449	0.822934	0.835146	0.719067	0.938774	4.67257e-06	1.18009	2.84417e-05	0.0177891	2.21213	0.135759	Mfap4	Genotype effect with no sex effect(real)
12216	IMPC_IPG_002_001-0	Blood glucose concentration	0.261373	0.987269	0.888979	0.996557	35	6	0.781538	0.0784623	0.210195	0.842944	0.208314	0.62991	0.835416	0.0908841	0.26841	0.626209	0.547951	-0.386953	0.623536	0.827493	0.993718	1.07701	0.926644	0.0554692	0.670694	0.174669	0.431828	-0.342469	0.801277	Mmachc	Not significant
12314	IMPC_IPG_002_001-120	Blood glucose concentration	0.00342786	0.99993	0.947427	0.206419	34	6	0.807903	3.512e-09	0.834952	0.862436	3.11948e-08	0.900556	0.726675	-0.154318	0.760152	-0.12597	0.979793	-0.0106834	0.876942	0.999415	0.972676	1.02258	0.97053	1.96061e-07	1.46185	2.23208e-06	0.0670048	1.57714	0.316179	Mmachc	Not significant
12413	IMPC_IPG_002_001-15	Blood glucose concentration	0.889516	0.999999	0.916298	0.737844	35	6	0.521961	0.123155	0.402281	0.753987	0.2861	0.704959	0.534912	0.272492	0.556389	0.389737	0.737134	0.197598	0.781892	0.937517	1.03213	1.0503	1.01947	0.168413	0.494092	0.414067	0.24716	0.301954	0.696388	Mmachc	Not significant
12513	IMPC_IPG_002_001-30	Blood glucose concentration	0.227753	0.999999	0.675255	0.941304	35	6	0.00342527	8.91468e-06	0.339415	0.0598522	4.07914e-05	0.663784	0.0397899	0.880924	0.178089	0.642227	0.0110309	1.21668	0.593987	0.283634	1.16986	1.10798	1.23981	8.26364e-05	1.1324	0.000394522	0.00418477	1.70685	0.142298	Mmachc	Genotype effect with no sex effect(real)
12613	IMPC_IPG_002_001-60	Blood glucose concentration	0.407029	1	0.99982	0.963045	35	6	0.135627	5.16202e-07	0.544725	0.356575	2.88691e-06	0.783367	0.35438	0.405826	0.16375	0.649661	0.547986	0.280077	0.593987	0.827493	1.09554	1.16128	1.07447	5.26341e-06	1.37766	2.9961e-05	0.0647994	1.00808	0.315636	Mmachc	Not significant
12217	IMPC_IPG_002_001-0	Blood glucose concentration	0.240604	0.999689	0.989607	0.999552	35	6	0.0962096	0.0117267	0.0151508	0.438383	0.0429978	0.185636	0.106934	-0.696314	0.0439656	-1.07301	0.662896	-0.268273	0.289717	0.894427	0.906561	0.863097	0.953321	0.0551598	0.599024	0.209914	0.13864	1.40376	0.483693	Nek2	Interaction_One sex_Female only2
12315	IMPC_IPG_002_001-120	Blood glucose concentration	0.00138787	0.991693	0.740142	0.938504	34	6	0.193698	7.38993e-08	0.50235	0.6082	6.21623e-07	0.83714	0.289228	-0.463532	0.664817	-0.184176	0.208637	-0.57374	0.931835	0.894427	0.889471	0.952092	0.875462	2.55566e-07	1.43777	2.91771e-06	0.26618	1.0482	0.645149	Nek2	Not significant
12414	IMPC_IPG_002_001-15	Blood glucose concentration	0.262595	0.999982	0.963842	0.934533	35	6	0.191465	0.0496253	0.105771	0.6082	0.147842	0.581738	0.205553	-0.550844	0.216331	-0.826814	0.669024	-0.233682	0.672507	0.894427	0.934183	0.913298	0.958128	0.160811	0.480555	0.45898	0.0328668	1.07369	0.213634	Nek2	Not significant
12514	IMPC_IPG_002_001-30	Blood glucose concentration	0.157555	1	0.986239	0.913762	35	6	0.170666	2.12167e-06	0.583497	0.59525	1.31913e-05	0.88766	0.258821	-0.493448	0.208686	-0.615813	0.574357	-0.268363	0.672507	0.894427	0.912955	0.886877	0.949996	7.39747e-05	1.19841	0.000405381	0.0159211	1.54586	0.114719	Nek2	Not significant
12614	IMPC_IPG_002_001-60	Blood glucose concentration	0.0567288	1	1	0.871149	35	6	0.142664	2.00122e-07	0.771806	0.547081	1.5205e-06	0.905941	0.250675	-0.501496	0.25588	-0.532029	0.422412	-0.358632	0.690394	0.894427	0.889136	0.84212	0.944323	4.27162e-06	1.31053	2.92606e-05	0.0800041	1.48393	0.369051	Nek2	Not significant
12218	IMPC_IPG_002_001-0	Blood glucose concentration	0.0857563	0.997113	0.952106	0.991284	34	6	0.771588	0.0161608	0.384745	0.855343	0.0429992	0.67963	0.757515	-0.129878	0.673378	0.220608	0.474497	-0.434873	0.958438	0.729227	0.973299	1.0106	0.946313	0.0156793	0.773341	0.0532368	0.889853	0.11786	0.960951	Pebp1	Not significant
12316	IMPC_IPG_002_001-120	Blood glucose concentration	0.00101311	0.993261	0.445951	0.137689	35	6	0.352751	4.72318e-08	0.479289	0.604136	3.35121e-07	0.734535	0.446818	-0.331833	0.892164	-0.0642118	0.248609	-0.476089	0.958438	0.518528	0.917013	0.96221	0.905504	1.30537e-06	1.43927	9.52917e-06	0.0310198	1.02739	0.132056	Pebp1	Not significant
12415	IMPC_IPG_002_001-15	Blood glucose concentration	0.478851	0.999999	0.959381	0.905381	35	6	0.739983	0.0764161	0.300182	0.843038	0.16994	0.607428	0.747746	0.141505	0.89852	-0.0857174	0.47325	0.407865	0.958438	0.729227	1.01549	0.985592	1.04834	0.179247	0.4566	0.408908	0.2648	0.950183	0.540482	Pebp1	Not significant
12515	IMPC_IPG_002_001-30	Blood glucose concentration	0.257566	1	0.99472	0.972495	35	6	0.149387	1.16277e-06	0.0828976	0.359012	5.58882e-06	0.334168	0.239853	-0.513149	0.0293367	-1.00137	0.8849	0.0695779	0.485685	0.954378	0.926753	0.830981	1.01909	9.24376e-05	1.10255	0.000408966	0.0147396	2.1735	0.091331	Pebp1	Not significant
12615	IMPC_IPG_002_001-60	Blood glucose concentration	0.144038	1	1	0.870305	35	6	0.592218	5.40684e-08	0.505848	0.754192	3.66191e-07	0.734535	0.821121	0.0995942	0.930545	-0.0401895	0.416582	0.353764	0.958438	0.699092	1.01138	0.942082	1.08555	2.69094e-06	1.3345	1.87084e-05	0.0495054	1.72846	0.17991	Pebp1	Not significant
12219	IMPC_IPG_002_001-0	Blood glucose concentration	0.063776	0.999229	0.957874	0.999863	34	6	0.0130134	0.00263831	0.0983916	0.0380761	0.0101671	0.310918	0.0387646	0.846713	0.529336	0.318243	0.00799321	1.41508	0.790605	0.0670485	1.1742	1.05486	1.28806	0.0177426	0.678184	0.0627179	0.0301579	1.77502	0.792753	Plk1	Genotype effect with no sex effect(real)
12317	IMPC_IPG_002_001-120	Blood glucose concentration	0.00211667	0.991308	0.569197	0.15459	35	6	0.743795	2.4454e-08	0.633752	0.788722	5.51961e-07	0.741724	0.936984	0.0346103	0.922032	-0.0449022	0.580696	0.231155	0.97393	0.670045	1.02273	0.962248	1.09061	1.46939e-06	1.36537	1.17551e-05	0.0460733	1.64143	0.875875	Plk1	Not significant
12416	IMPC_IPG_002_001-15	Blood glucose concentration	0.345032	0.99389	0.617223	0.867427	34	6	0.595385	0.00439521	0.152355	0.667169	0.0157828	0.342261	0.724162	0.147282	0.540086	-0.330444	0.20165	0.699846	0.790605	0.318607	1.01439	0.951908	1.08082	0.0443169	0.636119	0.145207	0.0134944	1.66641	0.792753	Plk1	Not significant
12516	IMPC_IPG_002_001-30	Blood glucose concentration	0.173216	1	0.94389	0.961334	35	6	0.84198	2.88138e-06	0.169978	0.875216	1.82103e-05	0.349468	0.978797	0.0117097	0.433869	-0.383952	0.299487	0.503133	0.721593	0.41647	1.00744	0.925755	1.09011	8.3318e-05	1.11721	0.000383768	0.0615861	2.0043	0.875875	Plk1	Not significant
12616	IMPC_IPG_002_001-60	Blood glucose concentration	0.160259	1	0.997964	0.804838	35	6	0.332424	5.4039e-07	0.862796	0.407155	4.74342e-06	0.885206	0.574936	0.246585	0.464898	0.357472	0.583802	0.250026	0.761587	0.670045	1.03996	1.07282	1.04124	3.3089e-06	1.33383	2.18675e-05	0.202806	1.22639	0.915525	Plk1	Not significant
12220	IMPC_IPG_002_001-0	Blood glucose concentration	0.476912	0.999564	0.941919	0.988256	35	6	0.0176387	0.0175666	0.0286321	0.110242	0.0537754	0.238542	0.34071	-0.415678	0.207971	0.674632	0.0263179	-1.4545	0.636646	0.197384	0.937929	1.11385	0.786676	0.0526474	0.600723	0.180506	0.164765	-1.52841	0.433593	Pmm2	One sex_Male only
12318	IMPC_IPG_002_001-120	Blood glucose concentration	0.00205027	0.993339	0.357168	0.438127	35	6	0.00383125	3.44375e-07	0.000853691	0.0410492	2.37645e-06	0.0426845	0.965601	-0.0188848	0.0460664	1.09995	0.0127187	-1.01125	0.314089	0.139845	0.974154	1.27839	0.775424	4.27708e-07	1.47554	3.62293e-06	0.376993	-0.635661	0.632077	Pmm2	Different direction
12417	IMPC_IPG_002_001-15	Blood glucose concentration	0.0121792	0.999999	0.968948	0.749145	35	6	0.888954	0.392172	0.285187	0.945696	0.5942	0.724401	0.892367	0.0595789	0.251995	0.802648	0.248921	-0.643025	0.704694	0.54909	1.04229	1.16826	0.927444	0.145924	0.472093	0.36865	0.387674	-0.973579	0.632077	Pmm2	Not significant
12517	IMPC_IPG_002_001-30	Blood glucose concentration	0.124087	1	0.425644	0.794335	35	6	0.991253	0.000428965	0.115201	0.991253	0.00183842	0.504742	0.91603	-0.0464497	0.380045	0.572994	0.195305	-0.56666	0.782591	0.488766	0.964978	1.11041	0.867489	8.57924e-05	1.15773	0.000426004	0.987831	0.0180753	0.987831	Pmm2	Not significant
12617	IMPC_IPG_002_001-60	Blood glucose concentration	0.18689	1	0.999997	0.95527	35	6	0.327408	2.74586e-06	0.0479018	0.571061	1.52716e-05	0.342156	0.397182	-0.371332	0.528205	0.313691	0.0431213	-0.934174	0.805364	0.279016	0.903438	1.05747	0.814175	3.24287e-06	1.42546	2.12261e-05	0.7161	0.177591	0.875393	Pmm2	Interaction_One sex_Male only2
12221	IMPC_IPG_002_001-0	Blood glucose concentration	0.136395	0.988763	0.886988	0.997905	35	6	0.0705002	0.0221594	0.0220096	0.257119	0.0742638	0.272919	0.0796325	0.751986	0.287225	0.555024	0.11277	1.00186	0.521008	0.810278	1.12271	1.08434	1.16666	0.0539094	0.617285	0.192767	0.176584	1.06412	0.499255	Ptpn12	Interaction_cannot classify2
12319	IMPC_IPG_002_001-120	Blood glucose concentration	0.00252938	0.99063	0.808921	0.275793	35	6	0.461337	3.95734e-08	0.821903	0.697631	3.48824e-07	0.943793	0.72146	0.155905	0.745938	0.149154	0.509313	0.280478	0.890823	0.941587	1.01414	1.04472	1.01554	2.36663e-06	1.37461	1.64272e-05	0.0260335	1.50593	0.153721	Ptpn12	Not significant
12418	IMPC_IPG_002_001-15	Blood glucose concentration	0.530519	0.999996	0.907273	0.794715	35	6	0.922009	0.0434474	0.151616	0.974744	0.128273	0.566021	0.924413	0.0417496	0.573946	-0.377141	0.362836	0.500729	0.749151	0.941587	1.01272	0.964672	1.06278	0.164173	0.467708	0.430498	0.110215	1.34558	0.374231	Ptpn12	Not significant
12518	IMPC_IPG_002_001-30	Blood glucose concentration	0.206198	1	0.95337	0.991184	35	6	0.152496	3.55603e-06	0.0737321	0.370773	1.74679e-05	0.53781	0.348166	0.411015	0.831374	-0.104972	0.0296536	1.01976	0.937186	0.413132	1.0722	0.986492	1.1592	8.48304e-05	1.08213	0.000417083	0.0393937	2.20686	0.195393	Ptpn12	Not significant
12618	IMPC_IPG_002_001-60	Blood glucose concentration	0.253841	1	1	0.883089	35	6	0.561777	4.21965e-08	0.80997	0.760553	3.48824e-07	0.943793	0.800234	0.111435	0.826636	0.0996595	0.580992	0.241438	0.937186	0.941587	1.01773	0.992062	1.06062	3.69103e-06	1.37933	2.17771e-05	0.00582282	1.52111	0.0673809	Ptpn12	Not significant
12222	IMPC_IPG_002_001-0	Blood glucose concentration	0.0606848	0.974588	0.982852	0.996163	34	6	0.00228949	0.0155638	0.0290203	0.00949467	0.0510346	0.204593	0.0104274	-1.0359	0.610562	-0.25481	0.0026595	-1.77446	0.789861	0.0148499	0.852076	0.951568	0.768911	0.0167836	0.723098	0.0570642	0.122472	-0.796548	0.559713	Pttg1	One sex_Male only
12320	IMPC_IPG_002_001-120	Blood glucose concentration	0.00212646	0.990247	0.824653	0.233826	34	6	0.263183	3.43698e-09	0.228204	0.469732	6.92307e-08	0.54082	0.618713	0.219075	0.103323	0.637146	0.976816	-0.0123157	0.428486	0.984051	1.02432	1.13543	0.980525	7.80574e-08	1.58677	9.65073e-07	0.0231785	0.93731	0.388125	Pttg1	Not significant
12419	IMPC_IPG_002_001-15	Blood glucose concentration	0.644542	1	0.995775	0.85499	35	6	0.0381832	0.033096	0.0769789	0.10682	0.101446	0.319236	0.868695	0.0727939	0.0862963	1.1354	0.0998539	-0.94883	0.385231	0.288939	1.00995	1.13781	0.893165	0.155176	0.478134	0.370245	0.0294953	-1.6061	0.388125	Pttg1	Genotype effect with no sex effect(real)
12519	IMPC_IPG_002_001-30	Blood glucose concentration	0.138276	1	0.933971	0.921807	35	6	0.0160744	2.72035e-05	0.3056	0.0549391	0.000109591	0.584532	0.0716221	0.777224	0.0204616	1.16489	0.344729	0.492168	0.151846	0.598401	1.16985	1.2902	1.09586	0.000101231	1.19717	0.000430233	0.319542	0.524449	0.721547	Pttg1	Genotype effect with no sex effect(real)
12619	IMPC_IPG_002_001-60	Blood glucose concentration	0.189152	1	0.999328	0.99411	35	6	0.00123025	4.80856e-07	0.583749	0.00578216	3.39003e-06	0.784416	0.0366779	0.895058	0.0776619	0.799393	0.0113948	1.10145	0.365011	0.0484277	1.23049	1.2228	1.26554	2.65587e-06	1.29179	1.71999e-05	0.0155065	1.59385	0.388125	Pttg1	Genotype effect with no sex effect(real)
12223	IMPC_IPG_002_001-0	Blood glucose concentration	0.755707	0.999964	0.985839	0.964171	35	6	0.421177	0.0304641	0.13834	0.911268	0.100548	0.937495	0.435679	-0.341493	0.310211	-0.498726	0.84349	-0.134959	0.985589	0.911881	0.965794	0.92205	1.0133	0.0479914	0.575175	0.170151	0.523938	0.938942	0.84293	Rock1	Not significant
12321	IMPC_IPG_002_001-120	Blood glucose concentration	0.000884557	0.988732	0.521231	0.79704	34	6	0.118438	7.02468e-08	0.162233	0.611292	5.61975e-07	0.937495	0.21763	-0.536281	0.901983	-0.0516702	0.058406	-0.845064	0.985589	0.647397	0.869374	0.973189	0.825457	1.93422e-07	1.49453	2.32106e-06	0.31598	0.701137	0.707618	Rock1	Not significant
12420	IMPC_IPG_002_001-15	Blood glucose concentration	0.540103	0.999996	0.877456	0.818439	35	6	0.496646	0.182426	0.479391	0.911268	0.392731	0.937495	0.510051	-0.289138	0.933334	-0.0531695	0.433122	-0.485966	0.985589	0.831471	0.954507	0.972286	0.941874	0.180812	0.456647	0.440728	0.978068	0.0238514	0.981806	Rock1	Not significant
12520	IMPC_IPG_002_001-30	Blood glucose concentration	0.143299	1	0.984329	0.987024	35	6	0.533103	3.84361e-06	0.733872	0.911268	2.12061e-05	0.937495	0.558106	-0.257462	0.855276	-0.0919925	0.518388	-0.314693	0.985589	0.831471	0.945866	0.974342	0.940409	6.70415e-05	1.2628	0.000326827	0.0218729	1.0401	0.267523	Rock1	Not significant
12620	IMPC_IPG_002_001-60	Blood glucose concentration	0.118327	1	0.999994	0.958059	35	6	0.582693	3.79719e-07	0.918735	0.926134	2.53146e-06	0.942292	0.795506	0.114146	0.667942	0.203163	0.764285	0.139752	0.985589	0.911881	1.04315	1.04209	1.06894	2.83413e-06	1.33728	1.84218e-05	0.198552	1.27387	0.572002	Rock1	Not significant
12224	IMPC_IPG_002_001-0	Blood glucose concentration	0.802707	0.999049	0.943778	0.999586	35	6	0.745905	0.0102244	0.0350429	0.880062	0.050942	0.319883	0.753504	-0.137621	0.254604	-0.651698	0.473215	0.42638	0.544827	0.905717	0.986732	0.885204	1.08663	0.0516912	0.582434	0.253109	0.196159	1.66051	0.535664	Sra1	Interaction_cannot classify2
12322	IMPC_IPG_002_001-120	Blood glucose concentration	0.230096	0.994906	0.464813	0.322563	33	6	0.078917	3.56213e-07	0.812619	0.224124	4.59838e-06	0.94651	0.287048	0.444584	0.385792	0.435914	0.121473	0.569038	0.684781	0.574971	1.13125	1.19183	1.11402	1.97027e-07	1.27363	3.99684e-06	0.240822	1.40675	0.604667	Sra1	Not significant
12421	IMPC_IPG_002_001-15	Blood glucose concentration	0.419644	0.999999	0.971505	0.948431	35	6	0.00165875	0.112839	0.00314632	0.0286547	0.320462	0.0671945	0.00229991	1.26508	0.0814029	1.08455	0.00688237	1.48342	0.335177	0.139614	1.16888	1.13211	1.20893	0.139862	0.441239	0.461869	0.293575	0.840112	0.660703	Sra1	One sex_Male only
12521	IMPC_IPG_002_001-30	Blood glucose concentration	0.165745	1	0.243178	0.967779	35	6	0.018286	0.000123967	0.906454	0.0927361	0.00117355	0.998903	0.0751904	0.767962	0.166363	0.854011	0.0674428	0.775645	0.492158	0.504046	1.16243	1.18574	1.16496	6.12325e-05	1.09354	0.000579668	0.402241	1.01517	0.740478	Sra1	Genotype effect with no sex effect(real)
12621	IMPC_IPG_002_001-60	Blood glucose concentration	0.0186799	1	0.109623	0.98725	35	6	0.00878725	3.50091e-06	0.543686	0.0567177	3.82407e-05	0.852895	0.0608367	0.807555	0.077714	1.05092	0.0838931	0.670457	0.335177	0.507571	1.30036	1.47659	1.20463	2.68591e-06	1.23984	4.15876e-05	0.461859	0.859376	0.756554	Sra1	Genotype effect with no sex effect(real)
12225	IMPC_IPG_002_001-0	Blood glucose concentration	0.148885	0.999243	0.994066	0.999959	35	6	0.0107729	0.0148645	0.57663	0.0982058	0.0761064	0.738086	0.0134611	-1.04327	0.0245352	-1.22161	0.174605	-0.813937	0.321352	0.532742	0.854216	0.848276	0.866632	0.0588503	0.59495	0.26903	0.103351	1.00262	0.367472	Ulk3	Genotype effect with no sex effect(real)
12323	IMPC_IPG_002_001-120	Blood glucose concentration	0.000732162	0.981483	0.409	0.327459	35	6	0.132826	1.164e-07	0.661457	0.309123	1.53187e-06	0.793087	0.245017	-0.503971	0.508919	-0.316609	0.171571	-0.57283	0.76975	0.532742	0.871303	0.920975	0.855471	2.85883e-06	1.38254	3.30231e-05	0.0258818	1.12632	0.197589	Ulk3	Not significant
12422	IMPC_IPG_002_001-15	Blood glucose concentration	0.454616	0.996292	0.462767	0.790888	34	6	0.0541652	0.0240164	0.909172	0.169101	0.109789	0.93171	0.0993081	0.676685	0.215984	0.673186	0.187354	0.756001	0.564204	0.557704	1.08139	1.08179	1.08983	0.0436727	0.644446	0.232921	0.226904	0.72726	0.580873	Ulk3	Not significant
12522	IMPC_IPG_002_001-30	Blood glucose concentration	0.112931	1	0.834284	0.990176	35	6	0.00866736	5.34532e-06	0.25939	0.0924519	4.56134e-05	0.58889	0.0696121	0.782615	0.307542	0.489909	0.0131186	1.17284	0.594109	0.139931	1.13587	1.08367	1.19757	7.70439e-05	1.13773	0.000657441	0.00610594	1.82066	0.111652	Ulk3	Genotype effect with no sex effect(real)
12622	IMPC_IPG_002_001-60	Blood glucose concentration	0.165598	0.997848	0.999999	0.979289	34	6	0.449422	4.71882e-08	0.138153	0.653704	7.55011e-07	0.58889	0.682084	0.17118	0.658447	-0.198527	0.108635	0.612026	0.863434	0.466599	1.04729	0.93824	1.14365	8.84839e-06	1.20939	8.08996e-05	0.00296323	2.01994	0.0758587	Ulk3	Not significant
12226	IMPC_IPG_002_001-0	Blood glucose concentration	0.375401	0.984524	0.975985	0.994251	35	6	0.0613225	0.0210146	0.683945	0.240241	0.0790813	0.841357	0.104252	0.698327	0.267515	0.570991	0.167879	0.880628	0.616231	0.615556	1.1053	1.08438	1.13332	0.0526328	0.641259	0.235203	0.0919034	0.950896	0.365061	Ywhaz	Not significant
12324	IMPC_IPG_002_001-120	Blood glucose concentration	0.00201538	0.99096	0.580835	0.155438	35	6	0.961706	2.11675e-08	0.383964	0.968479	3.02695e-07	0.793592	0.915466	-0.0464435	0.596538	-0.240018	0.531556	0.26147	0.889567	0.873707	0.971284	0.941612	1.01554	3.22994e-06	1.33395	3.87651e-05	0.0093764	1.83544	0.137519	Ywhaz	Not significant
12423	IMPC_IPG_002_001-15	Blood glucose concentration	0.340377	0.999996	0.821469	0.864865	35	6	0.734649	0.0264075	0.0597616	0.863455	0.0968276	0.631787	0.742559	0.144444	0.500796	-0.434833	0.166674	0.764734	0.852545	0.615556	1.01734	0.941831	1.09346	0.15857	0.478473	0.482459	0.00212187	1.67804	0.120125	Ywhaz	Not significant
12523	IMPC_IPG_002_001-30	Blood glucose concentration	0.148588	1	0.952795	0.985845	35	6	0.375188	3.02966e-06	0.618428	0.631199	2.54848e-05	0.818252	0.592458	0.23541	0.79849	0.125657	0.359819	0.448289	0.934464	0.788389	1.03822	1.01079	1.07859	8.13867e-05	1.20313	0.000646572	0.0337958	1.52576	0.230133	Ywhaz	Not significant
12623	IMPC_IPG_002_001-60	Blood glucose concentration	0.093286	0.997268	0.999993	0.860795	35	6	0.0962462	4.70686e-08	0.274545	0.305849	6.11892e-07	0.793592	0.331276	0.423216	0.706717	0.169395	0.061222	0.788907	0.90439	0.546293	1.11142	1.04206	1.18802	3.61264e-06	1.30515	3.9739e-05	0.00588179	1.92467	0.130031	Ywhaz	Not significant
67	IMPC_DXA_007_001	BMC/Body weight	0.701112	0.996038	0.885131	0.670347	36	6	0.897446	6.85781e-07	0.502334	0.977609	5.58912e-06	0.835515	0.925745	-0.0388671	0.754134	0.162863	0.520396	-0.240597	0.93835	0.883588	0.996671	1.02348	0.966033	3.22782e-05	-1.16476	0.000248714	0.0287928	-1.56822	0.173823	A2m	Not significant
671	IMPC_DXA_007_001	BMC/Body weight	0.878396	1	0.67773	0.336152	37	6	0.512095	6.44446e-07	0.896662	0.763945	5.86446e-06	0.959047	0.605785	0.226037	0.753504	0.167343	0.553533	0.249841	0.95103	0.841098	1.02523	1.01991	1.02714	1.97932e-05	-1.29093	0.000164943	0.00287679	-1.20843	0.151249	Ahcy	Not significant
672	IMPC_DXA_007_001	BMC/Body weight	0.821493	1	0.840687	0.419601	37	6	0.0527361	1.52902e-06	0.832576	0.241079	1.22322e-05	0.876396	0.143264	0.633807	0.302878	0.550892	0.103748	0.682601	0.515536	0.572404	1.07113	1.05914	1.08055	1.93151e-05	-1.26249	0.000197014	0.0112631	-1.13078	0.156298	Atp5b	Not significant
673	IMPC_DXA_007_001	BMC/Body weight	0.845967	1	0.998266	0.662314	36	6	0.383912	1.46085e-07	0.211114	0.548262	1.53389e-06	0.580369	0.602531	-0.225659	0.159909	-0.637617	0.811685	0.106439	0.359301	0.913874	0.973179	0.926248	1.01892	1.40968e-06	-1.43747	1.32613e-05	0.0261648	-0.693416	0.449558	Atp6v0d1	Not significant
674	IMPC_DXA_007_001	BMC/Body weight	0.82161	0.997109	0.754217	0.635493	36	6	0.833809	8.74883e-07	0.90725	0.9116	6.54413e-06	0.971972	0.878745	0.0636397	0.851538	0.0989653	0.939218	0.0283141	0.988219	0.955395	1.00523	1.00565	1.00476	2.66121e-05	-1.20412	0.000159673	0.0363211	-1.27478	0.240636	C8a	Not significant
675	IMPC_DXA_007_001	BMC/Body weight	0.904559	0.999999	0.805099	0.472166	37	6	0.540724	9.53593e-07	0.815951	0.686759	6.91355e-06	0.935887	0.682213	-0.179404	0.60933	-0.271403	0.777732	-0.122217	0.876227	0.877401	0.980278	0.973551	0.983998	2.12665e-05	-1.28801	0.000138232	0.0163518	-1.13883	0.286138	Cdk4	Not significant
676	IMPC_DXA_007_001	BMC/Body weight	0.795314	1	0.997924	0.513243	36	6	0.952152	3.23357e-08	0.935814	0.957244	5.52646e-07	0.961383	0.962102	0.0206284	0.988978	0.00619486	0.924827	-0.0409431	0.994442	0.936578	1.00365	1.00373	0.99427	1.48823e-06	-1.36809	1.35429e-05	0.0527075	-1.41523	0.582883	Dhfr	Not significant
677	IMPC_DXA_007_001	BMC/Body weight	0.692939	1	0.92566	0.407635	37	6	0.105077	1.92827e-07	0.034324	0.386098	2.34358e-06	0.235791	0.937653	-0.0343149	0.235366	0.596036	0.0929538	-0.695245	0.555278	0.546172	1.00323	1.06449	0.928533	2.13432e-05	-1.13142	0.000170746	0.018528	-2.4227	0.204106	Dync1li1	Interaction_cannot classify2
678	IMPC_DXA_007_001	BMC/Body weight	0.867684	1	0.921184	0.23387	36	6	0.652042	8.8335e-07	0.224105	0.793604	5.44732e-06	0.893578	0.682636	0.17733	0.633963	-0.240484	0.236785	0.518949	0.836462	0.644001	1.01603	0.975554	1.05384	1.92988e-06	-1.3715	1.49356e-05	0.45046	-0.61207	0.89973	G6pd2	Not significant
679	IMPC_DXA_007_001	BMC/Body weight	0.715775	0.999999	0.843972	0.355289	37	6	0.824604	3.65759e-07	0.447233	0.899539	2.58845e-06	0.656563	0.842026	0.0873514	0.548628	0.309137	0.694488	-0.167766	0.764754	0.893794	1.01279	1.03774	0.97989	2.2092e-05	-1.23329	0.000145176	0.0176449	-1.7102	0.0880632	Galc	Not significant
6710	IMPC_DXA_007_001	BMC/Body weight	0.838108	1	0.999915	0.466308	36	6	0.615727	8.25135e-08	0.298629	0.817157	1.41098e-06	0.822677	0.665928	0.187135	0.730015	-0.160445	0.289716	0.455188	0.885288	0.739425	1.01889	0.98612	1.04768	8.26378e-07	-1.43149	1.41311e-05	0.167625	-0.815854	0.649664	Gnpda1	Not significant
6711	IMPC_DXA_007_001	BMC/Body weight	0.858089	0.997048	0.97433	0.959782	36	6	0.792009	6.92488e-06	0.213256	0.88606	4.13184e-05	0.669368	0.840687	-0.0838394	0.377889	-0.475774	0.440127	0.308095	0.634257	0.624022	0.982406	0.943239	1.02717	1.75552e-05	-1.24619	0.000105937	0.46408	-0.462319	0.937479	Idh1	Not significant
6712	IMPC_DXA_007_001	BMC/Body weight	0.971453	1	0.899024	0.754308	37	6	0.283346	2.94732e-06	0.113417	0.487905	3.21938e-05	0.364058	0.398937	0.368389	0.771092	-0.15838	0.0428551	0.858371	0.940005	0.243502	1.0367	0.977117	1.10109	7.63859e-06	-1.36113	7.2312e-05	0.275565	-0.344375	0.601452	Lmbrd1	Not significant
6713	IMPC_DXA_007_001	BMC/Body weight	0.968908	1	0.772309	0.380771	37	6	0.7255	1.0707e-06	0.345327	0.992495	6.46882e-06	0.755445	0.76629	0.130314	0.723009	-0.190529	0.328646	0.414795	0.845454	0.822934	1.00514	0.968202	1.04357	1.01683e-05	-1.34542	5.69427e-05	0.066479	-0.740098	0.292105	Mfap4	Not significant
6714	IMPC_DXA_007_001	BMC/Body weight	0.832188	0.997148	0.959251	0.747962	36	6	0.200584	5.14737e-06	0.721878	0.439576	2.50727e-05	0.840688	0.334286	0.400459	0.591913	0.290255	0.18794	0.510663	0.805214	0.634082	1.04327	1.03061	1.05774	3.147e-05	-1.17802	0.000166341	0.190314	-0.957614	0.623498	Mmachc	Not significant
6715	IMPC_DXA_007_001	BMC/Body weight	0.907253	1	0.928233	0.417974	37	6	0.281025	2.48392e-07	0.0551396	0.47744	1.70634e-06	0.318261	0.4688	-0.316679	0.627774	0.246301	0.0235126	-0.910873	0.839927	0.247666	0.956369	1.03774	0.858687	2.38595e-05	-1.15494	0.000130375	0.00612443	-2.31212	0.197095	Mvk	Not significant
6716	IMPC_DXA_007_001	BMC/Body weight	0.747861	0.996502	0.847293	0.735549	36	6	0.350741	1.61272e-06	0.744501	0.703769	1.04827e-05	0.905941	0.492303	0.285535	0.46836	0.384678	0.622089	0.186392	0.850343	0.894427	1.03376	1.04487	1.02106	3.92671e-05	-1.16318	0.000233895	0.0477727	-1.36146	0.27326	Nek2	Not significant
6717	IMPC_DXA_007_001	BMC/Body weight	0.849499	1	0.803928	0.385243	37	6	0.938009	4.32781e-07	0.715572	0.956282	3.77481e-06	0.846232	0.923533	0.0421049	0.789145	0.140223	0.831744	-0.0901457	0.944241	0.936339	1.00401	1.01634	0.985679	2.33572e-05	-1.26289	0.000142012	0.00528046	-1.49326	0.0957788	Npc2	Not significant
6718	IMPC_DXA_007_001	BMC/Body weight	0.92647	1	0.772704	0.387597	37	6	0.738742	4.76287e-07	0.951335	0.843038	2.53453e-06	0.967606	0.840601	-0.0882017	0.869877	-0.0862698	0.768244	-0.124916	0.958438	0.924213	0.992711	0.998514	0.981944	1.94069e-05	-1.28695	9.4447e-05	0.00327126	-1.3256	0.0812363	Pebp1	Not significant
6719	IMPC_DXA_007_001	BMC/Body weight	0.773118	1	0.999779	0.376095	36	6	0.147055	2.30395e-08	0.67608	0.45681	2.40269e-07	0.869744	0.292113	0.45423	0.224828	0.535094	0.480343	0.298632	0.669897	0.911597	1.05412	1.06184	1.03536	1.41978e-06	-1.3452	9.93849e-06	0.0187281	-1.58166	0.264229	Phyh	Not significant
6720	IMPC_DXA_007_001	BMC/Body weight	0.934239	0.999999	0.647275	0.355713	37	6	0.431901	6.43569e-07	0.472995	0.545187	4.95549e-06	0.58273	0.541444	0.267189	0.966538	0.0223676	0.253645	0.475737	0.982879	0.394559	1.02647	1.0003	1.05241	9.60205e-06	-1.34214	6.41591e-05	0.00914391	-0.888767	0.415903	Pipox	Not significant
6721	IMPC_DXA_007_001	BMC/Body weight	0.947069	1	0.943827	0.975055	37	6	0.628295	4.17534e-05	0.0432205	0.699089	0.000212808	0.237243	0.674237	0.184207	0.345224	-0.523001	0.0699522	0.856498	0.673401	0.175436	1.01853	0.946805	1.09698	1.59634e-05	-1.29192	8.36701e-05	0.908135	0.0875831	0.998034	Plk1	Interaction_cannot classify2
6722	IMPC_DXA_007_001	BMC/Body weight	0.903316	1	0.999699	0.49365	36	6	0.864756	3.76257e-08	0.884636	0.93319	3.52741e-07	0.921496	0.97806	-0.0119407	0.837375	-0.0929626	0.985691	-0.00775978	0.895106	0.985691	0.996985	0.991403	0.99427	1.61809e-06	-1.38314	1.10955e-05	0.043736	-1.29793	0.205013	Pmm2	Not significant
6723	IMPC_DXA_007_001	BMC/Body weight	0.951121	1	0.926875	0.458112	37	6	0.582304	3.69304e-06	0.259562	0.739683	1.73573e-05	0.571848	0.650333	0.198629	0.730363	-0.189339	0.207291	0.551068	0.842417	0.432272	1.01853	0.980684	1.05795	1.40013e-05	-1.31453	7.05248e-05	0.330964	-0.574123	0.724807	Pttg1	Not significant
6724	IMPC_DXA_007_001	BMC/Body weight	0.66767	0.996847	0.666811	0.4778	36	6	0.147185	8.75236e-06	0.749823	0.672847	4.51734e-05	0.937495	0.26881	-0.45772	0.312543	-0.557093	0.351077	-0.358347	0.985589	0.831471	0.953875	0.946805	0.961957	3.95935e-05	-1.15259	0.000212986	0.228114	-0.953842	0.604503	Rock1	Not significant
6725	IMPC_DXA_007_001	BMC/Body weight	0.846566	0.999999	0.916659	0.43953	37	6	0.635852	1.94374e-06	0.663009	0.853711	2.30009e-05	0.891608	0.752978	-0.137954	0.582412	-0.297264	0.975988	-0.0132086	0.852603	0.992346	0.987929	0.977117	0.996324	2.30557e-05	-1.27888	0.00025184	0.100147	-0.994822	0.432113	Sra1	Not significant
6726	IMPC_DXA_007_001	BMC/Body weight	0.889553	1	0.881492	0.486107	37	6	0.350197	1.18173e-06	0.837828	0.615134	1.11415e-05	0.921611	0.51669	-0.283685	0.491029	-0.366486	0.587327	-0.235423	0.845989	0.884219	0.965933	0.955721	0.973727	2.30389e-05	-1.27797	0.000219637	0.0197694	-1.1469	0.199971	Ywhaz	Not significant
66	IMPC_DXA_006_001	Body length	0.0421866	0.76171	0.326233	0.659037	37	6	0.0402289	3.63202e-07	0.443266	0.23419	3.48246e-06	0.820666	0.133918	-0.638443	0.054578	-0.84777	0.394451	-0.396299	0.355278	0.836609	0.981465	0.976914	0.986968	7.07723e-06	1.21423	6.1336e-05	0.0428341	1.6657	0.20836	A2m	Genotype effect with no sex effect(real)
661	IMPC_DXA_006_001	Body length	0.0437126	0.551616	0.238189	0.78572	37	6	0.887829	2.78013e-07	0.716402	0.98812	3.1624e-06	0.959047	0.887796	-0.0605505	0.879485	0.0684183	0.742664	-0.154026	0.988064	0.904058	0.997497	0.998785	0.99743	7.60957e-06	1.31326	7.00881e-05	0.0197946	1.09081	0.293957	Ahcy	Not significant
662	IMPC_DXA_006_001	Body length	0.0492266	0.451996	0.209387	0.692424	37	6	0.069873	1.55094e-07	0.469412	0.269516	2.06792e-06	0.67619	0.190842	-0.553609	0.0837124	-0.746164	0.470783	-0.327664	0.312853	0.857444	0.985028	0.980559	0.990455	6.65732e-06	1.23547	7.2755e-05	0.0109409	1.65397	0.156298	Atp5b	Not significant
663	IMPC_DXA_006_001	Body length	0.104573	0.789105	0.519409	0.967547	37	6	0.00626197	2.00933e-07	0.438842	0.0394504	1.7262e-06	0.678202	0.0439605	-0.849194	0.0140189	-1.05809	0.203732	-0.608513	0.121497	0.583414	0.97434	0.969623	0.979993	7.70041e-06	1.17599	5.6059e-05	0.0587035	1.62557	0.550478	Atp6v0d1	Genotype effect with no sex effect(real)
664	IMPC_DXA_006_001	Body length	0.0172775	0.41453	0.210503	0.588394	37	6	0.989117	8.10351e-08	0.0681664	0.989117	7.21598e-07	0.402701	0.959232	-0.0218199	0.212802	-0.536481	0.237216	0.52439	0.552694	0.49578	1.00106	0.984204	1.01836	6.66013e-06	1.1673	4.42423e-05	0.022899	2.22817	0.235351	C8a	Not significant
665	IMPC_DXA_006_001	Body length	0.364288	0.895332	0.705561	0.599363	37	6	0.0112848	1.07103e-07	0.597373	0.0701269	8.87426e-07	0.896279	0.0655815	-0.7818	0.0416742	-0.918408	0.178586	-0.61195	0.23888	0.513067	0.972559	0.969623	0.976505	5.70035e-06	1.22999	4.18852e-05	0.0360154	1.53645	0.286138	Cdk4	Genotype effect with no sex effect(real)
666	IMPC_DXA_006_001	Body length	0.525242	0.948092	0.393986	0.0913523	37	6	7.26797e-05	2.44213e-05	0.0191437	0.00182783	0.000167244	0.138424	0.0021166	-1.26267	0.161557	-0.536941	0.000725116	-1.95746	0.420048	0.0170359	0.951184	0.980559	0.924192	6.09613e-06	1.14438	4.10924e-05	0.756722	-0.276143	0.937226	Dhfr	One sex_Male only
667	IMPC_DXA_006_001	Body length	0.0312808	0.505469	0.200318	0.775245	37	6	0.492999	1.27484e-07	0.449283	0.830103	1.67854e-06	0.79369	0.601863	-0.223189	0.321632	-0.431901	0.967042	0.0190879	0.609291	0.982945	0.995715	0.987849	1.00441	8.16985e-06	1.24187	6.89899e-05	0.021918	1.69286	0.210738	Dync1li1	Not significant
668	IMPC_DXA_006_001	Body length	0.038229	0.420858	0.149816	0.720476	37	6	0.0229226	5.79749e-08	0.441378	0.0902273	5.10731e-07	0.926707	0.102845	-0.685573	0.0372975	-0.887682	0.319856	-0.450411	0.191668	0.655139	0.979684	0.976914	0.98348	6.7809e-06	1.22298	4.02333e-05	0.00376818	1.66026	0.119725	G6pd2	Genotype effect with no sex effect(real)
669	IMPC_DXA_006_001	Body length	0.108275	0.745748	0.443069	0.662138	37	6	0.0634059	5.33916e-08	0.0589031	0.20115	4.46548e-07	0.237568	0.183311	-0.567966	0.00877702	-1.08975	0.974134	-0.014734	0.0703707	0.979457	0.985028	0.969623	1.00092	7.33159e-06	1.16368	5.18851e-05	0.00973963	2.23869	0.0742646	Galc	Not significant
6610	IMPC_DXA_006_001	Body length	0.0583939	0.615513	0.179046	0.752678	37	6	0.616672	3.53061e-07	0.70291	0.817157	4.64411e-06	0.890352	0.749817	0.136895	0.543105	0.271761	0.937515	0.03741	0.79964	0.974611	1.00462	1.00608	1.00441	7.08782e-06	1.3091	8.08012e-05	0.0542767	1.07475	0.477056	Gnpda1	Not significant
6611	IMPC_DXA_006_001	Body length	0.0318421	0.961906	0.739712	0.813498	37	6	2.29542e-05	3.77114e-07	0.876477	0.0006848	3.21445e-06	0.9595	0.00130516	-1.31497	0.00120162	-1.34261	0.0121124	-1.25696	0.0268862	0.127352	0.936934	0.922236	0.952093	7.32934e-06	1.12403	4.58083e-05	0.108332	1.20969	0.752066	Idh1	Genotype effect with no sex effect(real)
6612	IMPC_DXA_006_001	Body length	0.197747	0.862849	0.611398	0.809635	37	6	0.602123	2.09909e-07	0.357716	0.705068	3.31189e-06	0.584152	0.681502	-0.17752	0.329659	-0.441276	0.797495	0.119318	0.738005	0.91326	0.990372	0.976914	1.00441	7.39867e-06	1.22402	7.2312e-05	0.0612342	1.78462	0.276541	Lmbrd1	Not significant
6613	IMPC_DXA_006_001	Body length	0.0782639	0.845717	0.563945	0.717285	37	6	0.0620078	4.65226e-08	0.0996725	0.310039	3.55041e-07	0.585312	0.182259	-0.57099	0.0147567	-1.02561	0.853027	-0.0842026	0.112617	0.96632	0.986809	0.973269	1.00092	7.85125e-06	1.1902	4.57989e-05	0.00491486	2.1316	0.0647868	Mfap4	Not significant
6614	IMPC_DXA_006_001	Body length	0.0343757	0.507851	0.207681	0.790344	37	6	0.298383	2.15958e-07	0.671485	0.501538	1.55097e-06	0.846109	0.437041	-0.331827	0.318934	-0.442217	0.685971	-0.187616	0.637666	0.814913	0.990372	0.987849	0.993943	7.59077e-06	1.25143	4.46688e-05	0.0416653	1.50603	0.237974	Mvk	Not significant
6615	IMPC_DXA_006_001	Body length	0.104745	0.843935	0.588139	0.679227	37	6	0.0171277	5.75873e-08	0.248709	0.163284	5.14686e-07	0.69736	0.087346	-0.726793	0.016271	-1.03987	0.400874	-0.38115	0.136868	0.894427	0.979684	0.973269	0.986968	7.0858e-06	1.20496	4.41252e-05	0.00866817	1.86368	0.0856384	Nek2	Genotype effect with no sex effect(real)
6616	IMPC_DXA_006_001	Body length	0.281138	0.943322	0.545464	0.541846	37	6	0.10093	1.20169e-05	0.612631	0.278	7.54662e-05	0.846232	0.192348	-0.560807	0.385917	-0.379243	0.19756	-0.710139	0.803554	0.59648	0.982768	0.987849	0.979055	6.79304e-06	1.19261	4.48932e-05	0.474036	0.861719	0.790955	Npc2	Not significant
6617	IMPC_DXA_006_001	Body length	0.0199384	0.489642	0.173036	0.660156	37	6	0.0717866	1.75347e-07	0.221254	0.21829	1.08861e-06	0.524913	0.222879	0.516822	0.681871	0.179887	0.0467482	0.886158	0.958438	0.239071	1.01709	1.00243	1.03231	7.60693e-06	1.19884	4.05248e-05	0.0147392	1.90511	0.091331	Pebp1	Not significant
6618	IMPC_DXA_006_001	Body length	0.0969498	0.84794	0.550291	0.774989	37	6	0.163036	1.28805e-07	0.361814	0.469007	1.17534e-06	0.852014	0.309849	-0.436813	0.118741	-0.689575	0.741631	-0.150506	0.456214	0.938888	0.98859	0.980559	0.99743	6.22721e-06	1.24116	3.79047e-05	0.024767	1.78023	0.264229	Phyh	Not significant
6619	IMPC_DXA_006_001	Body length	0.123081	0.910074	0.275556	0.206144	37	6	0.00712716	4.55994e-05	0.105183	0.0288837	0.000280892	0.286226	0.0308099	-0.910088	0.364199	-0.384703	0.0107189	-1.40251	0.594858	0.0663551	0.968907	0.987849	0.951917	6.56617e-06	1.21954	4.59632e-05	0.818697	0.201732	0.932702	Pipox	Genotype effect with no sex effect(real)
6620	IMPC_DXA_006_001	Body length	0.102361	0.870808	0.174467	0.211113	37	6	0.00180939	4.92978e-05	0.269614	0.0129947	0.000243408	0.471589	0.0127324	-1.03808	0.0922501	-0.682826	0.0146202	-1.36183	0.334096	0.090219	0.967215	0.980559	0.95558	6.96461e-06	1.16533	4.23448e-05	0.619461	0.486328	0.998034	Plk1	Genotype effect with no sex effect(real)
6621	IMPC_DXA_006_001	Body length	0.0536444	0.522709	0.206771	0.689909	37	6	0.13268	2.75015e-07	0.980594	0.349157	2.06553e-06	0.981295	0.26782	-0.47152	0.321472	-0.446962	0.313273	-0.461467	0.782591	0.606651	0.985028	0.987849	0.98348	5.78349e-06	1.28059	3.33129e-05	0.0418843	1.26609	0.205013	Pmm2	Not significant
6622	IMPC_DXA_006_001	Body length	0.00583511	0.365538	0.163742	0.757556	37	6	0.000766474	8.52663e-06	0.0215378	0.00415665	3.67913e-05	0.202455	0.0146237	-1.00462	0.502592	-0.292744	0.00110395	-1.68357	0.776933	0.00834098	0.965434	0.987849	0.945117	7.99271e-06	1.21854	4.1808e-05	0.750718	-0.172283	0.897476	Pttg1	One sex_Male only
6623	IMPC_DXA_006_001	Body length	0.0212122	0.405659	0.0970807	0.647674	37	6	0.202966	1.42907e-07	0.866428	0.784777	1.08881e-06	0.941181	0.350708	-0.396342	0.332226	-0.428593	0.466574	-0.329453	0.985589	0.831471	0.986809	0.984204	0.990455	7.35938e-06	1.28157	4.59225e-05	0.000112565	1.38071	0.0178978	Rock1	Not significant
6624	IMPC_DXA_006_001	Body length	0.0256804	0.953182	0.761212	0.517959	37	6	0.000885134	7.17608e-08	0.153358	0.0286547	1.45572e-06	0.543176	0.0158773	-1.01297	0.000885543	-1.39342	0.197219	-0.601674	0.0314368	0.700128	0.945841	0.914945	0.976505	7.32256e-06	1.14136	9.45276e-05	0.0166065	1.93311	0.235812	Sra1	Genotype effect with no sex effect(real)
6625	IMPC_DXA_006_001	Body length	0.0236216	0.723549	0.258585	0.813365	37	6	0.0781119	6.89233e-06	0.16554	0.208298	5.51386e-05	0.58889	0.167564	-0.588325	0.767198	-0.133266	0.0490471	-1.00868	0.89777	0.298954	0.979876	0.991495	0.969906	6.71774e-06	1.28407	6.61439e-05	0.564523	0.408653	0.73826	Ulk3	Not significant
23	IMPC_BWT_001_001	Body weight	0.000201549	1	0.768761	0.545302	40	6	0.956113	0.0645456	0.206047	0.977609	0.194832	0.718894	0.95732	0.0233581	0.507933	-0.412697	0.439044	0.459413	0.890249	0.843973	1.0466	0.909921	1.17597	0.174978	0.405034	0.535228	0.287686	1.27714	0.58616	A2m	Not significant
61	IMPC_DXA_001_001	Body weight	0.0227788	0.996653	0.926426	0.905507	36	6	0.00780113	3.26675e-10	0.00639943	0.0776635	6.65601e-09	0.080239	0.338545	-0.396824	0.00494153	-1.07463	0.454598	0.280983	0.115067	0.851719	0.960714	0.886846	1.02125	9.28304e-08	1.18511	1.50483e-06	0.020147	2.54072	0.145816	A2m	One sex_Female only
92	IMPC_GRS_003_001	Body weight	0.00524589	0.983817	0.929271	0.836059	37	6	0.0147152	4.34806e-12	0.00371474	0.114218	7.08733e-10	0.0605503	0.897333	-0.0508822	0.039039	-0.66958	0.0717684	0.600628	0.303017	0.557059	0.981486	0.92096	1.03537	2.20795e-09	1.21407	1.87325e-07	0.0140519	2.48428	0.127247	A2m	One sex_Female only
117	IMPC_HWT_007_001	Body weight	0.0269065	0.997219	0.991082	0.844403	39	6	0.00809079	5.83795e-11	0.00430888	0.0776635	2.37896e-09	0.0638497	0.466039	-0.302133	0.0079129	-1.02857	0.280252	0.393409	0.11531	0.823938	0.970934	0.886768	1.03566	1.31055e-08	1.2048	3.10389e-07	0.0238635	2.62677	0.149659	A2m	One sex_Female only
121	IMPC_IPG_001_001	Body Weight	0.0434495	0.999987	0.99888	0.367368	35	6	0.0057124	2.07542e-10	0.00177489	0.0665086	5.63821e-09	0.0334684	0.5367	-0.270993	0.00733618	-1.0369	0.1368	0.599108	0.11531	0.655835	0.965084	0.888082	1.0432	9.64633e-08	1.21557	1.50483e-06	0.0205753	2.85158	0.145816	A2m	One sex_Female only
611	IMPC_DXA_001_001	Body weight	0.0113158	0.999992	0.84188	0.860834	37	6	0.337446	8.64858e-10	0.854277	0.646786	2.21165e-08	0.959047	0.579928	0.24199	0.443738	0.312019	0.607881	0.212261	0.861375	0.841098	1.01765	1.00566	1.03251	7.49994e-08	1.49111	1.64061e-06	0.0147547	1.39135	0.293957	Ahcy	Not significant
921	IMPC_GRS_003_001	Body weight	0.0278001	0.999999	0.68005	0.553289	39	6	0.247711	4.16676e-11	0.899188	0.518199	3.79176e-09	0.959047	0.519413	0.280819	0.389535	0.333185	0.494459	0.267833	0.861375	0.841098	1.02227	1.0254	1.02524	3.60204e-09	1.53578	2.30387e-07	0.0280491	1.47043	0.340329	Ahcy	Not significant
1171	IMPC_HWT_007_001	Body weight	0.0118829	0.999999	0.966051	0.777348	40	6	0.14915	1.85062e-10	0.709931	0.437828	6.73626e-09	0.959047	0.370177	0.389007	0.477173	0.289911	0.221496	0.488103	0.861375	0.7111	1.02961	1.00989	1.04569	2.86592e-08	1.45784	7.16481e-07	0.0017129	1.65603	0.151249	Ahcy	Not significant
1211	IMPC_IPG_001_001	Body Weight	0.0192558	0.999998	0.995497	0.370423	35	6	0.0863963	2.15697e-09	0.237414	0.349425	4.36187e-08	0.86021	0.360117	0.400589	0.722512	0.148818	0.0492603	0.771999	0.932604	0.443443	1.03147	1.00434	1.07051	1.87225e-07	1.39579	2.97858e-06	0.0133994	2.01897	0.293957	Ahcy	Not significant
612	IMPC_DXA_001_001	Body weight	0.026573	0.999999	0.974051	0.788311	37	6	0.0140986	2.18686e-09	0.711551	0.125321	4.99854e-08	0.779782	0.112543	-0.684939	0.0594586	-0.762377	0.164983	-0.569056	0.306883	0.61389	0.92329	0.908062	0.94032	6.16212e-08	1.42243	1.46665e-06	0.0210373	1.61575	0.197998	Atp5b	Genotype effect with no sex effect(real)
922	IMPC_GRS_003_001	Body weight	0.0123844	0.996784	0.922171	0.572464	38	6	0.0614098	4.71367e-11	0.967529	0.265556	2.72679e-09	0.967529	0.233588	-0.49153	0.166126	-0.463058	0.253052	-0.443718	0.385219	0.73067	0.949599	0.943521	0.964555	5.47042e-09	1.4494	4.85893e-07	0.00588104	1.46874	0.156076	Atp5b	Not significant
1172	IMPC_HWT_007_001	Body weight	0.0132724	0.999992	0.971057	0.742708	40	6	0.144655	1.20056e-10	0.0745538	0.345446	4.80225e-09	0.374109	0.362782	-0.394603	0.0265788	-0.863307	0.855391	0.0741017	0.21263	0.97343	0.963743	0.903369	1.01297	2.72639e-08	1.35529	1.04285e-06	0.0117545	2.2927	0.156298	Atp5b	Not significant
1213	IMPC_IPG_001_001	Body Weight	0.0130605	0.988837	0.970887	0.313725	33	6	0.0256459	1.93367e-10	0.112572	0.179517	6.18775e-09	0.473411	0.116543	-0.651895	0.000687698	-0.918704	0.655748	-0.183545	0.110032	0.926596	0.940013	0.908583	0.99377	1.39787e-07	1.33017	2.67343e-06	0.00288827	2.06532	0.154041	Atp5b	Genotype effect with no sex effect(real)
231	IMPC_BWT_001_001	Body weight	0.000114313	1	0.82596	0.832661	40	6	4.25655e-06	0.093013	0.9666	0.000114927	0.240814	0.992867	7.71762e-06	1.74766	0.00329021	1.76136	0.000626922	1.73396	0.0598819	0.0169269	1.5043	1.48936	1.51844	0.14663	0.379423	0.416978	0.380749	0.352029	0.719616	Atp6v0d1	Genotype effect with no sex effect(real)
613	IMPC_DXA_001_001	Body weight	0.00749049	0.999996	0.863376	0.998612	37	6	0.00585947	7.84933e-10	0.109391	0.0381876	3.70881e-08	0.574304	0.070193	-0.777589	0.00179016	-1.17509	0.426678	-0.344847	0.0436341	0.772673	0.919491	0.88826	0.949539	1.20427e-07	1.30381	1.99251e-06	0.0195431	2.13406	0.449558	Atp6v0d1	Genotype effect with no sex effect(real)
923	IMPC_GRS_003_001	Body weight	0.0389549	1	0.829757	0.81859	39	6	0.117136	1.37926e-10	0.944368	0.233038	1.3034e-08	0.991587	0.317117	-0.434682	0.316055	-0.397163	0.277118	-0.433664	0.532611	0.671147	0.957615	0.96997	0.952934	2.24481e-09	1.50293	2.04277e-07	0.0959897	1.46643	0.550478	Atp6v0d1	Not significant
1173	IMPC_HWT_007_001	Body weight	0.0101653	1	0.998776	0.961873	40	6	0.0417649	1.55094e-09	0.855781	0.135829	4.34278e-08	0.940364	0.188359	-0.568167	0.220281	-0.518592	0.134352	-0.617742	0.414129	0.488318	0.937024	0.947638	0.92837	1.48772e-08	1.44682	5.41529e-07	0.0971726	1.34767	0.550478	Atp6v0d1	Genotype effect with no sex effect(real)
1215	IMPC_IPG_001_001	Body Weight	0.00959647	0.99606	0.934346	0.195957	34	6	0.0364667	1.34743e-06	0.578457	0.125313	8.78154e-06	0.782525	0.0942067	-0.686776	0.188398	-0.454255	0.127434	-0.772052	0.399738	0.487884	0.908594	0.9312	0.91021	1.0563e-06	1.25158	1.13086e-05	0.361973	0.933787	0.706085	Atp6v0d1	Genotype effect with no sex effect(real)
232	IMPC_BWT_001_001	Body weight	0.00263557	1	0.893851	0.63621	40	6	0.540931	0.137764	0.371128	0.722529	0.338971	0.708172	0.552123	0.258992	0.389923	0.561625	0.939985	-0.0436408	0.722542	0.955395	1.01858	1.05081	0.988074	0.125161	0.498245	0.362725	0.862778	-0.107021	0.976943	C8a	Not significant
614	IMPC_DXA_001_001	Body weight	0.0173527	0.999996	0.936852	0.846902	37	6	0.357446	1.22671e-09	0.240337	0.548008	2.01467e-08	0.639732	0.593234	0.233624	0.871843	-0.0669893	0.160039	0.571531	0.988219	0.49578	1.01195	0.97454	1.04749	8.80674e-08	1.37988	1.09204e-06	0.0354917	2.0184	0.240636	C8a	Not significant
924	IMPC_GRS_003_001	Body weight	0.0316297	1	0.681733	0.573225	39	6	0.242292	4.18785e-11	0.944308	0.43151	2.61043e-09	0.981031	0.514267	0.284314	0.405958	0.321973	0.46564	0.285938	0.722992	0.680531	1.01614	1.02128	1.0175	3.12527e-09	1.53202	2.27561e-07	0.0359092	1.49599	0.240636	C8a	Not significant
1174	IMPC_HWT_007_001	Body weight	0.00881621	1	0.965425	0.784126	40	6	0.0149464	2.26686e-11	0.00375955	0.0846965	2.11951e-09	0.115278	0.94984	0.0274337	0.0644362	-0.728028	0.0431391	0.782896	0.365138	0.336273	1.05011	0.950405	1.13142	1.49704e-08	1.28662	3.97785e-07	0.0131457	2.79754	0.179879	C8a	One sex_Male only
1217	IMPC_IPG_001_001	Body Weight	0.133513	0.999999	0.997527	0.345931	35	6	0.073483	2.84961e-09	0.706589	0.190852	3.33049e-08	0.894875	0.332816	0.423769	0.358734	0.385583	0.144423	0.586398	0.691581	0.480868	1.0495	1.02412	1.08742	8.20069e-08	1.45182	1.08952e-06	0.0460035	1.65264	0.240636	C8a	Not significant
233	IMPC_BWT_001_001	Body weight	0.00915539	1	0.758981	0.590847	40	6	0.145423	0.0562387	0.102045	0.301234	0.177919	0.616973	0.156819	0.61093	0.51561	0.4078	0.15817	0.81406	0.795158	0.505075	1.0706	1.02124	1.11732	0.132389	0.482221	0.385756	0.0281448	0.888481	0.286138	Cdk4	Not significant
615	IMPC_DXA_001_001	Body weight	0.0333399	0.999996	0.988066	0.737224	37	6	0.026171	3.35726e-09	0.935062	0.111067	4.49357e-08	0.981142	0.144209	-0.631586	0.157979	-0.59028	0.122183	-0.633856	0.398381	0.494415	0.92709	0.92645	0.932254	6.12695e-08	1.44436	9.99284e-07	0.0465018	1.40078	0.286138	Cdk4	Genotype effect with no sex effect(real)
925	IMPC_GRS_003_001	Body weight	0.0525362	0.994646	0.904006	0.572464	38	6	0.0176246	4.63846e-11	0.885297	0.0851858	2.57278e-09	0.959438	0.139906	-0.606074	0.0660886	-0.601566	0.165211	-0.534734	0.245569	0.505075	0.924652	0.938764	0.923236	1.80907e-09	1.44112	1.26351e-07	0.0239836	1.50796	0.286138	Cdk4	Genotype effect with no sex effect(real)
1175	IMPC_HWT_007_001	Body weight	0.0152604	0.999999	0.996983	0.705523	40	6	0.0236911	4.62006e-10	0.893793	0.103056	1.33982e-08	0.959438	0.155751	-0.611903	0.114682	-0.647014	0.149201	-0.576792	0.350082	0.505075	0.933917	0.921353	0.944162	1.04486e-08	1.45359	2.94301e-07	0.0354283	1.52381	0.286138	Cdk4	Genotype effect with no sex effect(real)
1219	IMPC_IPG_001_001	Body Weight	0.0448088	0.999999	0.989338	0.28966	35	6	0.186209	5.01741e-09	0.544395	0.357996	6.23592e-08	0.896279	0.325647	-0.430028	0.648028	-0.199275	0.18714	-0.532439	0.916723	0.513067	0.952235	0.968816	0.954748	1.6663e-07	1.49733	1.76002e-06	0.0476896	1.16416	0.286138	Cdk4	Not significant
234	IMPC_BWT_001_001	Body weight	0.00989352	1	0.696526	0.791197	40	6	0.0379276	0.0885765	0.075421	0.0963566	0.225032	0.30546	0.164395	-0.600211	0.659194	0.254498	0.0236976	-1.45492	0.816145	0.0968511	0.818439	1.00233	0.644378	0.191924	0.391273	0.496535	0.192978	-1.31815	0.863804	Dhfr	Genotype effect with no sex effect(real)
616	IMPC_DXA_001_001	Body weight	0.00596121	0.999999	0.867189	0.504618	37	6	4.31306e-05	9.58442e-08	0.126177	0.00142016	1.20125e-06	0.382601	0.00255491	-1.25165	0.0379921	-0.821646	0.000815549	-1.64604	0.209532	0.0170359	0.851099	0.915134	0.80319	1.02228e-07	1.31797	1.43119e-06	0.527498	0.493573	0.935057	Dhfr	Genotype effect with no sex effect(real)
926	IMPC_GRS_003_001	Body weight	0.00597746	1	0.340955	0.683653	39	6	0.00451417	1.10921e-08	0.0152862	0.0229368	2.7972e-07	0.130628	0.111742	-0.684812	0.956732	0.0224968	0.00301994	-1.35348	0.972767	0.0354843	0.895706	0.979463	0.83414	1.22209e-08	1.50693	3.18989e-07	0.837692	0.130948	0.943031	Dhfr	One sex_Male only
1176	IMPC_HWT_007_001	Body weight	0.00924478	1	0.996697	0.99742	40	6	0.00803074	9.07537e-09	0.36304	0.032123	2.7972e-07	0.618009	0.0775944	-0.756287	0.243482	-0.507738	0.015404	-1.00484	0.486964	0.0782688	0.892286	0.947638	0.847152	1.22688e-08	1.45199	3.18989e-07	0.20617	0.954892	0.878361	Dhfr	Genotype effect with no sex effect(real)
12110	IMPC_IPG_001_001	Body Weight	0.00853474	0.999998	0.959713	0.978278	35	6	0.0149876	8.16809e-07	0.0742287	0.0494328	6.98001e-06	0.30546	0.0632689	-0.799601	0.627931	-0.221341	0.00514632	-1.25518	0.782763	0.0509215	0.887278	0.968816	0.83638	3.44353e-07	1.43125	3.4818e-06	0.560566	0.397413	0.935057	Dhfr	Genotype effect with no sex effect(real)
617	IMPC_DXA_001_001	Body weight	0.0130303	1	0.87904	0.861217	37	6	0.00260099	1.96709e-11	0.000648493	0.0513695	7.77001e-10	0.0256155	0.709439	-0.163269	0.00625118	-1.02197	0.0669856	0.728704	0.0823072	0.481078	0.992315	0.903819	1.06938	8.76538e-08	1.23112	1.66542e-06	0.00598406	2.98179	0.117437	Dync1li1	One sex_Female only
928	IMPC_GRS_003_001	Body weight	0.020601	0.996715	0.923663	0.564572	38	6	0.00377753	1.51772e-12	0.000841781	0.059685	1.199e-10	0.0266003	0.878147	-0.0637978	0.0104161	-0.806555	0.047779	0.744503	0.0994361	0.39732	1.01962	0.911249	1.11692	8.03936e-09	1.24533	4.15347e-07	0.003998	2.79639	0.104614	Dync1li1	Different direction
1177	IMPC_HWT_007_001	Body weight	0.00804121	1	0.971986	0.784126	40	6	0.00738644	1.13382e-11	0.00172995	0.0725478	5.97147e-10	0.0455553	0.993642	0.00347699	0.0384365	-0.808042	0.0344461	0.814996	0.209412	0.354123	1.00662	0.918586	1.0784	1.68986e-08	1.27244	4.31678e-07	0.00954531	2.89548	0.149861	Dync1li1	Different direction
12111	IMPC_IPG_001_001	Body Weight	0.112155	1	0.998453	0.372276	35	6	7.15601e-05	1.21164e-12	1.25838e-05	0.00282663	1.199e-10	0.000662744	0.951011	-0.0270612	0.00489167	-1.055	0.00290402	1.10045	0.0702621	0.229384	0.989354	0.855788	1.11344	2.32857e-07	1.16166	3.53942e-06	0.000887928	3.31712	0.0464682	Dync1li1	Different direction
235	IMPC_BWT_001_001	Body weight	0.0559219	1	0.71431	0.753921	40	6	0.10751	0.194779	0.198875	0.251763	0.396104	0.893578	0.117528	-0.673656	0.452597	-0.458223	0.150433	-0.88909	0.721815	0.57678	0.900801	0.928185	0.87488	0.148389	0.423528	0.388431	0.995159	-0.00733882	0.995159	G6pd2	Not significant
618	IMPC_DXA_001_001	Body weight	0.00691071	0.999996	0.96062	0.792459	37	6	0.0488982	4.04691e-09	0.8007	0.153325	4.67924e-08	0.963115	0.19088	-0.566993	0.25595	-0.478774	0.137496	-0.615955	0.563699	0.57678	0.922657	0.92645	0.924187	1.35936e-07	1.45249	1.51228e-06	0.0137023	1.31531	0.230071	G6pd2	Genotype effect with no sex effect(real)
9210	IMPC_GRS_003_001	Body weight	0.0554631	1	0.787632	0.554141	39	6	0.0020611	2.6326e-12	0.282853	0.0200686	4.73231e-10	0.893578	0.0652944	-0.789656	0.00393582	-1.02389	0.180892	-0.518287	0.0781811	0.589971	0.912356	0.903132	0.924527	2.09571e-09	1.44838	9.2939e-08	0.00303397	1.95398	0.119725	G6pd2	Genotype effect with no sex effect(real)
1178	IMPC_HWT_007_001	Body weight	0.00779086	0.997479	0.939407	0.681615	40	6	0.0770824	7.14879e-10	0.801125	0.203718	1.10211e-08	0.963115	0.259794	-0.485767	0.178686	-0.553785	0.309359	-0.417749	0.49758	0.655139	0.937024	0.929653	0.943034	2.09277e-08	1.4285	4.13903e-07	0.0495915	1.56454	0.331749	G6pd2	Not significant
12112	IMPC_IPG_001_001	Body Weight	0.0164168	0.989717	0.994707	0.283514	33	6	0.00170628	8.34719e-11	0.438946	0.0175368	2.44382e-09	0.926707	0.0362031	-0.858153	0.000970046	-0.927456	0.151255	-0.581523	0.039629	0.57678	0.912993	0.918353	0.936537	5.6568e-08	1.36836	9.15373e-07	0.00388298	1.71429	0.119725	G6pd2	Genotype effect with no sex effect(real)
236	IMPC_BWT_001_001	Body weight	0.0746315	1	0.927972	0.728634	40	6	0.0311652	0.00551258	0.0256179	0.139863	0.0220503	0.161245	0.199297	-0.554977	0.0231563	-1.40822	0.576048	0.298265	0.115156	0.835601	0.914968	0.79012	1.03315	0.16172	0.411763	0.437596	0.0144189	2.11825	0.0875914	Galc	One sex_Female only
619	IMPC_DXA_001_001	Body weight	0.0117907	0.999995	0.971052	0.830186	37	6	0.00947532	2.20235e-10	0.0706094	0.0670561	3.94599e-09	0.256393	0.0972867	-0.714375	0.00180089	-1.153	0.564563	-0.239816	0.0411708	0.835601	0.937855	0.893918	0.978348	9.60894e-08	1.32965	1.67149e-06	0.00397807	2.24284	0.0485325	Galc	Genotype effect with no sex effect(real)
9211	IMPC_GRS_003_001	Body weight	0.0185227	0.994296	0.887894	0.551787	38	6	0.0872746	4.62827e-11	0.456993	0.233973	1.41934e-09	0.662099	0.272054	-0.453552	0.0702275	-0.593737	0.541641	-0.239492	0.268865	0.835601	0.953213	0.925816	0.985215	8.51117e-09	1.40364	3.00751e-07	0.00739086	1.75788	0.0674421	Galc	Not significant
12113	IMPC_IPG_001_001	Body Weight	0.0111439	0.984064	0.947768	0.318418	33	6	0.0871596	3.43197e-10	0.104487	0.233973	5.26235e-09	0.315175	0.203769	-0.530607	0.00402196	-0.815401	0.9142	-0.0444743	0.0557627	0.956011	0.947835	0.906955	1.00938	2.31094e-07	1.32883	2.3623e-06	0.00261221	2.09976	0.0434577	Galc	Not significant
237	IMPC_BWT_001_001	Body weight	0.00145466	1	0.939333	0.6229	40	6	0.163306	0.103979	0.184495	0.537026	0.317507	0.784356	0.175195	-0.585516	0.267656	-0.729705	0.42936	-0.441327	0.702135	0.884585	0.920889	0.919705	0.92201	0.173071	0.420619	0.519213	0.43715	0.708997	0.807404	Gnpda1	Not significant
6110	IMPC_DXA_001_001	Body weight	0.0111027	0.999966	0.862405	0.811517	37	6	0.258477	8.47534e-10	0.927378	0.622529	2.89857e-08	0.982615	0.509977	0.287602	0.488347	0.282843	0.418428	0.332088	0.79964	0.884585	1.03031	1.02829	1.03712	1.22874e-07	1.46988	3.00164e-06	0.001088	1.51913	0.184961	Gnpda1	Not significant
9212	IMPC_GRS_003_001	Body weight	0.0411507	0.999998	0.676883	0.538749	39	6	0.230707	4.09356e-11	0.414566	0.588821	3.49999e-09	0.822677	0.503432	0.291441	0.172313	0.520986	0.794405	0.102473	0.618474	0.971718	1.02371	1.05148	1.00717	1.86569e-09	1.58251	1.59516e-07	0.0336644	1.164	0.38153	Gnpda1	Not significant
1179	IMPC_HWT_007_001	Body weight	0.0199772	1	0.983926	0.870812	40	6	0.334068	3.57938e-10	0.458787	0.664251	1.53019e-08	0.822677	0.541322	0.265829	0.253211	0.468071	0.877401	0.0635857	0.702135	0.974611	1.02961	1.04724	1.01523	1.61115e-08	1.52164	6.88766e-07	0.018045	1.11716	0.306766	Gnpda1	Not significant
12114	IMPC_IPG_001_001	Body Weight	0.0305928	0.999998	0.99677	0.339287	35	6	0.156309	2.83739e-09	0.978007	0.534575	8.08655e-08	0.989581	0.458397	0.325217	0.345264	0.396168	0.350206	0.381238	0.749899	0.798469	1.03147	1.03825	1.0432	1.67041e-07	1.48133	3.17378e-06	0.0208343	1.4664	0.321985	Gnpda1	Not significant
238	IMPC_BWT_001_001	Body weight	0.0138881	1	0.914655	0.730405	40	6	0.00581566	0.193556	0.0209871	0.0273948	0.438564	0.41741	0.00731166	-1.12392	0.122918	-0.989109	0.0222649	-1.25873	0.322494	0.139468	0.835567	0.839476	0.831867	0.165287	0.403495	0.407399	0.878987	0.133876	0.988933	Idh1	One sex_Male only
6111	IMPC_DXA_001_001	Body weight	0.184567	0.999999	0.938864	0.999962	37	6	0.000917225	3.2903e-09	0.781035	0.00636324	4.41095e-08	0.937055	0.0239719	-0.959465	0.0374349	-0.866962	0.0199511	-1.01477	0.176648	0.139468	0.851732	0.833098	0.871179	5.67682e-08	1.37624	8.2787e-07	0.140094	1.22843	0.759901	Idh1	Genotype effect with no sex effect(real)
9213	IMPC_GRS_003_001	Body weight	0.159831	0.999999	0.51626	0.993231	39	6	0.00118477	7.38867e-11	0.724524	0.00731286	4.40857e-09	0.935983	0.0376706	-0.885562	0.0105317	-0.956158	0.066472	-0.778687	0.094259	0.226568	0.867098	0.834663	0.897411	3.28198e-09	1.41489	1.14869e-07	0.0754752	1.59236	0.752066	Idh1	Genotype effect with no sex effect(real)
11710	IMPC_HWT_007_001	Body weight	0.241553	1	0.978872	0.470853	40	6	0.000249471	2.41966e-09	0.60302	0.00299425	3.93744e-08	0.884758	0.0119798	-1.05778	0.0193314	-0.918607	0.0104737	-1.19696	0.123583	0.127352	0.846926	0.824514	0.8652	8.20989e-09	1.35971	2.05247e-07	0.263203	1.08136	0.856607	Idh1	Genotype effect with no sex effect(real)
12115	IMPC_IPG_001_001	Body Weight	0.108684	0.999993	0.613319	0.863589	34	6	5.59305e-05	3.98316e-10	0.551141	0.00125144	1.01855e-08	0.884758	0.00645201	-1.15156	0.000163844	-1.21405	0.037853	-0.929764	0.0136313	0.182356	0.824488	0.774187	0.884507	4.22127e-08	1.35412	6.71565e-07	0.0426794	1.63841	0.64689	Idh1	Genotype effect with no sex effect(real)
6112	IMPC_DXA_001_001	Body weight	0.182229	0.999999	0.977799	0.68156	37	6	2.50791e-05	6.62529e-11	0.420716	0.000727293	8.00555e-10	0.692068	0.00704843	-1.13049	0.000626828	-1.30241	0.0235129	-0.922102	0.00980705	0.222624	0.861864	0.837341	0.88616	3.59256e-08	1.34967	4.19132e-07	0.00181076	1.72997	0.0233897	Iqgap1	Genotype effect with no sex effect(real)
9214	IMPC_GRS_003_001	Body weight	0.24635	0.999999	0.893119	0.560234	39	6	3.07841e-05	6.58707e-13	0.348733	0.000738568	4.77563e-11	0.692068	0.0133048	-1.04358	0.000387951	-1.2327	0.0327754	-0.817696	0.00931841	0.240628	0.862069	0.839554	0.884499	7.02481e-10	1.4338	3.78615e-08	0.00214721	1.8488	0.0239496	Iqgap1	Genotype effect with no sex effect(real)
11711	IMPC_HWT_007_001	Body weight	0.176914	1	0.998553	0.607062	40	6	2.32583e-05	1.91352e-11	0.523263	0.000727293	3.96371e-10	0.751372	0.00749001	-1.12049	0.00114529	-1.27304	0.0153736	-0.967941	0.00980705	0.200216	0.865567	0.850799	0.877609	9.02675e-09	1.3713	1.57968e-07	0.0019357	1.67641	0.0233897	Iqgap1	Genotype effect with no sex effect(real)
12116	IMPC_IPG_001_001	Body Weight	0.211026	0.999996	0.793098	0.20317	34	6	8.26662e-06	1.70126e-09	0.465684	0.00059933	1.29833e-08	0.719421	0.0018565	-1.29702	0.00112557	-1.0412	0.00305674	-1.39064	0.00980705	0.147357	0.78729	0.813075	0.786147	1.67582e-08	1.37871	2.34615e-07	0.183329	1.02927	0.45569	Iqgap1	Genotype effect with no sex effect(real)
11712	IMPC_HWT_007_001	Body weight	0.0140915	0.994812	0.987838	0.896443	39	6	0.931061	2.80934e-10	0.181051	0.940063	1.34798e-08	0.391784	0.991646	-0.00435063	0.3735	-0.3649	0.366877	0.322355	0.738005	0.554219	0.992204	0.931037	1.03793	1.6776e-08	1.31989	1.08626e-06	0.0452904	2.00714	0.248806	Lmbrd1	Not significant
12117	IMPC_IPG_001_001	Body Weight	0.0492219	0.996284	0.997816	0.466398	34	6	0.00898351	2.92036e-10	0.00255187	0.0850439	1.34798e-08	0.263229	0.649953	-0.189489	0.0234229	-0.90094	0.0936429	0.590654	0.270385	0.343747	0.956421	0.859017	1.04604	2.32517e-07	1.16774	4.12717e-06	0.0140348	2.65934	0.228741	Lmbrd1	One sex_Female only
239	IMPC_BWT_001_001	Body weight	0.00725448	1	0.788978	0.514946	40	6	0.227927	0.140171	0.274159	0.590167	0.316253	0.733933	0.240976	0.507774	0.289663	0.682264	0.568519	0.333284	0.75002	0.822934	1.05072	1.06451	1.03767	0.157007	0.462337	0.38563	0.767584	0.113356	0.862788	Mfap4	Not significant
6113	IMPC_DXA_001_001	Body weight	0.00326213	0.99999	0.847384	0.85215	37	6	0.882997	8.6167e-10	0.573188	0.998392	1.38825e-08	0.846437	0.890436	-0.0603255	0.633381	-0.195288	0.784494	0.11334	0.816667	0.940267	0.985983	0.950495	1.01983	2.20625e-07	1.43202	2.4984e-06	0.00338709	1.74064	0.061391	Mfap4	Not significant
12118	IMPC_IPG_001_001	Body Weight	0.00837866	0.995986	0.995258	0.337435	34	6	0.100324	2.65562e-09	0.0934384	0.399077	2.5671e-08	0.585312	0.220067	-0.507557	0.0130678	-0.854284	0.974287	-0.0132964	0.11066	0.999803	0.944208	0.8848	1.01328	1.31225e-06	1.25403	8.74835e-06	0.00107255	2.09502	0.0518397	Mfap4	Not significant
6114	IMPC_DXA_001_001	Body weight	0.00376267	0.999999	0.868198	0.85904	37	6	0.458594	8.81991e-10	0.165619	0.728923	1.47084e-08	0.628726	0.610367	-0.223005	0.148159	-0.578958	0.681419	0.169982	0.593987	0.894733	0.982816	0.934936	1.02675	1.67196e-07	1.37019	2.06352e-06	0.0130891	2.11913	0.14606	Mmachc	Not significant
9215	IMPC_GRS_003_001	Body weight	0.0255523	1	0.682427	0.572464	39	6	0.556156	4.1952e-11	0.943968	0.756573	2.97693e-09	0.959242	0.691286	-0.173397	0.728632	-0.135452	0.66182	-0.172125	0.866326	0.88438	0.988506	0.974861	1.00458	4.48857e-09	1.52947	2.25373e-07	0.0344746	1.4928	0.208227	Mmachc	Not significant
11713	IMPC_HWT_007_001	Body weight	0.00521883	0.999999	0.970715	0.754463	40	6	0.997333	1.85656e-10	0.393653	0.997333	5.6068e-09	0.704959	0.998332	-0.000911728	0.569591	-0.232671	0.56837	0.230847	0.781892	0.847996	0.99419	0.957322	1.02425	3.38142e-08	1.42331	9.29432e-07	0.0174038	1.88683	0.155165	Mmachc	Not significant
12119	IMPC_IPG_001_001	Body Weight	0.00965741	0.999998	0.996408	0.344896	35	6	0.553324	2.83452e-09	0.67931	0.756573	2.85342e-08	0.840688	0.818531	0.100947	0.909032	0.0485805	0.499983	0.276791	0.943118	0.79471	1.00292	0.980119	1.038	3.68038e-07	1.44058	3.2041e-06	0.0174689	1.66879	0.155165	Mmachc	Not significant
2310	IMPC_BWT_001_001	Body weight	0.00319777	1	0.624106	0.478678	40	6	0.04479	0.0622866	0.0262129	0.147434	0.15873	0.27611	0.0510002	0.833447	0.550632	0.373934	0.0203866	1.29296	0.804126	0.247666	1.13435	1.01102	1.25109	0.192212	0.403219	0.482106	0.00458196	1.32224	0.197095	Mvk	One sex_Male only
6115	IMPC_DXA_001_001	Body weight	0.0200673	0.999868	0.921598	0.849622	37	6	0.990827	1.16587e-09	0.397143	0.990827	1.53506e-08	0.627487	0.958089	-0.0229732	0.564647	-0.236664	0.58208	0.228566	0.804126	0.760071	0.993582	0.953324	1.03136	6.5805e-08	1.40037	8.39014e-07	0.0567167	1.8656	0.237974	Mvk	Not significant
9216	IMPC_GRS_003_001	Body weight	0.055371	1	0.691546	0.572923	39	6	0.78388	4.20142e-11	0.556892	0.868507	4.66227e-09	0.778663	0.904846	0.0522435	0.833483	-0.0821671	0.567319	0.224731	0.928867	0.74724	1.01293	0.987902	1.03816	1.82494e-09	1.48501	2.48997e-07	0.069685	1.7919	0.24461	Mvk	Not significant
11714	IMPC_HWT_007_001	Body weight	0.0279543	1	0.994968	0.720795	40	6	0.889401	2.988e-10	0.404266	0.935202	6.74434e-09	0.632416	0.929997	0.0383228	0.647096	-0.190629	0.51024	0.267275	0.839927	0.707175	1.0178	0.976689	1.05133	1.05983e-08	1.41369	2.48997e-07	0.0726648	1.8716	0.24461	Mvk	Not significant
6116	IMPC_DXA_001_001	Body weight	0.00323214	0.995058	0.674414	0.833024	37	6	0.0512014	2.52671e-10	0.317777	0.332809	4.01466e-09	0.724858	0.211497	-0.539685	0.0417401	-0.779802	0.52567	-0.261826	0.289717	0.894427	0.95432	0.915134	0.991024	1.10732e-07	1.39644	1.68558e-06	0.00222134	1.91441	0.0397065	Nek2	Not significant
9217	IMPC_GRS_003_001	Body weight	0.0156638	0.99701	0.92982	0.559707	38	6	0.0185027	8.9083e-12	0.135393	0.165368	6.36944e-10	0.596568	0.142484	-0.602604	0.00298386	-0.909143	0.567363	-0.224632	0.0746673	0.894427	0.952499	0.906393	0.999419	9.50526e-09	1.35721	4.34074e-07	0.000522819	2.04172	0.0205467	Nek2	Genotype effect with no sex effect(real)
12120	IMPC_IPG_001_001	Body Weight	0.0113724	0.999999	0.998103	0.339479	35	6	0.0221181	8.07162e-10	0.0155778	0.177754	9.61868e-09	0.185636	0.327535	-0.428493	0.00887233	-1.00836	0.525317	0.26078	0.12377	0.894427	0.951521	0.875164	1.02889	5.30365e-07	1.27643	5.19e-06	0.00543872	2.54557	0.0707033	Nek2	One sex_Female only
2311	IMPC_BWT_001_001	Body weight	0.00355761	1	0.921789	0.842555	40	6	0.0672495	0.00661939	0.0322878	0.255684	0.0273485	0.2668	0.407614	-0.359981	0.0571584	-1.18884	0.381899	0.468882	0.522765	0.760846	0.963075	0.85513	1.06525	0.152836	0.426899	0.410234	0.0168303	2.08462	0.110098	Npc2	Interaction_cannot classify2
9218	IMPC_GRS_003_001	Body weight	0.0138228	0.981175	0.919834	0.836215	37	6	0.00197542	1.87745e-12	0.0253159	0.022045	1.91864e-10	0.247369	0.134653	0.581733	0.679578	0.141318	0.000400225	1.05641	0.910024	0.0157088	1.07575	1.0116	1.13305	1.99492e-09	1.26751	7.58071e-08	0.00276143	2.1826	0.0904633	Npc2	One sex_Male only
11715	IMPC_HWT_007_001	Body weight	0.0174368	0.997195	0.967796	0.939529	39	6	0.0218247	5.31421e-11	0.0116649	0.131787	1.85713e-09	0.16649	0.455439	0.309284	0.422332	-0.326996	0.00533363	0.913512	0.844663	0.0761255	1.05289	0.976689	1.11069	1.51754e-08	1.25001	3.84444e-07	0.0160688	2.49052	0.110098	Npc2	One sex_Male only
12121	IMPC_IPG_001_001	Body Weight	0.0580465	1	0.99862	0.0355621	35	6	0.730762	1.55623e-06	0.956124	0.837443	1.11058e-05	0.99339	0.707378	-0.165168	0.732314	-0.128737	0.867632	-0.0933267	0.912336	0.94596	0.961065	0.960743	0.977342	1.01425e-07	1.26318	1.28471e-06	0.405936	1.29859	0.741762	Npc2	Not significant
2312	IMPC_BWT_001_001	Body weight	0.000536449	1	0.752231	0.639411	40	6	0.00419221	0.000281432	0.000825032	0.0662239	0.00107521	0.0307324	0.581176	0.240372	0.110325	-0.981247	0.00387299	1.46199	0.684935	0.0903379	1.12251	0.865784	1.36552	0.215378	0.344608	0.455753	0.0061339	2.78785	0.091331	Pebp1	One sex_Male only
9219	IMPC_GRS_003_001	Body weight	0.00745418	0.996662	0.69107	0.824662	38	6	0.00947633	4.94637e-12	0.0083399	0.0784429	3.68505e-10	0.0860558	0.367517	0.373179	0.545989	-0.235013	0.00134261	0.981371	0.940453	0.0490053	1.04252	0.960189	1.1083	1.02944e-08	1.29329	2.61196e-07	0.00183006	2.50967	0.0797204	Pebp1	One sex_Male only
11716	IMPC_HWT_007_001	Body weight	0.0137001	1	0.971986	0.784126	40	6	0.000694297	1.089e-12	0.000144645	0.0209417	1.62261e-10	0.010776	0.839755	0.088208	0.0241929	-0.871623	0.00459272	1.04804	0.450931	0.0903379	1.02091	0.910286	1.11111	9.50359e-09	1.23375	2.61196e-07	0.00647398	3.15341	0.091331	Pebp1	Different direction
12122	IMPC_IPG_001_001	Body Weight	0.00662766	0.995895	0.995951	0.523709	34	6	0.00444456	9.30193e-11	0.00208941	0.0662239	1.44299e-09	0.0516671	0.535843	0.258162	0.280249	-0.445971	0.00114253	1.03227	0.842755	0.0490053	1.01606	0.931678	1.09579	4.53697e-07	1.18957	4.13999e-06	0.00173011	2.66781	0.0797204	Pebp1	One sex_Male only
6117	IMPC_DXA_001_001	Body weight	0.0154769	0.999996	0.852383	0.851787	37	6	0.490384	8.75721e-10	0.226565	0.769191	1.42061e-08	0.707999	0.633108	-0.208888	0.1982	-0.517805	0.740104	0.137409	0.657663	0.938888	0.974584	0.922207	1.02214	1.23798e-07	1.38306	1.41045e-06	0.0211478	2.03827	0.264229	Phyh	Not significant
9220	IMPC_GRS_003_001	Body weight	0.0248074	0.999999	0.658601	0.565564	39	6	0.456145	4.16569e-11	0.101648	0.769191	2.87836e-09	0.578754	0.623751	-0.214044	0.103181	-0.615604	0.569032	0.223726	0.443071	0.938888	0.98204	0.930845	1.02783	4.16406e-09	1.41219	1.94323e-07	0.0264232	2.25152	0.264229	Phyh	Not significant
11717	IMPC_HWT_007_001	Body weight	0.0258964	1	0.988568	0.746151	40	6	0.0532578	1.33664e-10	0.0328605	0.259188	3.90298e-09	0.436149	0.473351	-0.311848	0.0249069	-0.87462	0.535715	0.250924	0.227275	0.911597	0.971821	0.897835	1.03215	2.32293e-08	1.33185	5.42017e-07	0.0153415	2.4574	0.264229	Phyh	Interaction_One sex_Female only2
2313	IMPC_BWT_001_001	Body weight	2.13275e-06	1	0.817124	0.956206	40	6	0.782335	0.100351	0.340369	0.854465	0.308801	0.489877	0.788181	0.117223	0.728334	-0.193237	0.522541	0.427683	0.877583	0.676183	1.19071	0.96232	1.40689	0.1533	0.38199	0.417317	0.548492	1.00291	0.853209	Pipox	Not significant
11718	IMPC_HWT_007_001	Body weight	0.0179774	1	0.997522	0.727619	40	6	0.301345	4.50007e-10	0.815917	0.396642	1.56401e-08	0.883607	0.511514	-0.285682	0.40268	-0.349638	0.588526	-0.221727	0.643412	0.707427	0.966229	0.954555	0.975747	1.28184e-08	1.44726	3.41742e-07	0.0820565	1.57517	0.486027	Pipox	Not significant
12123	IMPC_IPG_001_001	Body Weight	0.0123474	0.999997	0.802122	0.104444	35	6	0.000135151	4.47471e-07	0.00304224	0.00231259	3.82836e-06	0.0514485	0.0153155	-1.02775	0.803783	-0.102345	0.000276086	-1.83488	0.922701	0.00701757	0.865905	0.972046	0.794833	3.98443e-07	1.37982	3.90474e-06	0.601673	-0.352709	0.908408	Pipox	One sex_Male only
6118	IMPC_DXA_001_001	Body weight	0.0645264	0.999999	0.979379	0.067474	37	6	0.00095402	2.14452e-06	0.0522447	0.0113969	1.47319e-05	0.242784	0.0144286	-1.03417	0.219778	-0.467201	0.00223738	-1.56384	0.516071	0.045182	0.869463	0.944837	0.812409	4.5006e-08	1.38038	6.84091e-07	0.750621	0.283742	0.998034	Plk1	Genotype effect with no sex effect(real)
9221	IMPC_GRS_003_001	Body weight	0.0227278	0.996475	0.952175	0.113231	38	6	0.00975758	1.28723e-08	0.0348671	0.0321187	3.3897e-07	0.237243	0.113324	-0.649092	0.876583	-0.0495339	0.0140924	-1.17302	0.972465	0.090219	0.924652	1.00513	0.870295	3.16826e-09	1.43694	1.20394e-07	0.711196	0.313452	0.998034	Plk1	One sex_Male only
11719	IMPC_HWT_007_001	Body weight	0.0157328	1	0.999837	0.0278707	40	6	0.00402214	3.0007e-07	0.0923501	0.0219645	2.96319e-06	0.303986	0.0392836	-0.877738	0.290513	-0.394505	0.00824824	-1.36097	0.620285	0.0670485	0.906577	0.949021	0.871968	8.42306e-09	1.4042	1.82901e-07	0.665427	0.437737	0.998034	Plk1	Genotype effect with no sex effect(real)
6119	IMPC_DXA_001_001	Body weight	0.018821	0.999995	0.990644	0.77092	37	6	0.280003	2.6986e-09	0.421385	0.550573	3.11377e-08	0.764194	0.461018	-0.321843	0.853334	-0.0788369	0.203765	-0.524104	0.895106	0.488766	0.954953	0.973126	0.94493	9.06536e-08	1.50756	1.18674e-06	0.0256632	1.06229	0.150796	Pmm2	Not significant
9222	IMPC_GRS_003_001	Body weight	0.00887397	0.996635	0.920562	0.572923	38	6	0.12165	4.70567e-11	0.597568	0.334331	1.76463e-09	0.829605	0.314954	-0.415659	0.128814	-0.505109	0.521555	-0.251562	0.559039	0.717736	0.959639	0.946857	0.98005	8.63863e-09	1.41829	2.48793e-07	0.00858227	1.67184	0.150796	Pmm2	Not significant
6120	IMPC_DXA_001_001	Body weight	0.00483576	0.999985	0.834899	0.844528	37	6	0.43954	8.5941e-10	0.827521	0.681287	1.65351e-08	0.943793	0.596718	-0.231322	0.711059	-0.151813	0.511954	-0.270547	0.881713	0.941587	0.968252	0.951909	0.986414	1.12864e-07	1.4905	1.66474e-06	0.00104643	1.37176	0.0464634	Ptpn12	Not significant
11720	IMPC_HWT_007_001	Body weight	0.00338109	0.992534	0.997144	0.739845	39	6	0.0983095	2.7822e-10	0.367661	0.289992	6.89986e-09	0.649188	0.285826	-0.440351	0.0661445	-0.64869	0.626875	-0.197436	0.276557	0.941587	0.960902	0.928944	0.99154	3.77049e-08	1.34843	7.41529e-07	0.00797432	1.79968	0.0764389	Ptpn12	Not significant
12124	IMPC_IPG_001_001	Body Weight	0.00687881	0.999995	0.994248	0.327478	35	6	0.157278	3.2314e-09	0.372077	0.37215	3.64267e-08	0.649188	0.301717	-0.451275	0.125489	-0.633035	0.714651	-0.150592	0.372137	0.956816	0.960087	0.930064	1.00027	5.63767e-07	1.38743	4.75175e-06	0.00597734	1.86987	0.0673809	Ptpn12	Not significant
2314	IMPC_BWT_001_001	Body weight	0.0126379	1	0.431674	0.653659	40	6	0.000179049	0.0382631	0.000555314	0.00114754	0.114789	0.0130499	0.00126804	-1.32654	0.448321	-0.422251	0.000175569	-2.23082	0.737831	0.00412154	0.83028	0.92775	0.73802	0.173251	0.379522	0.389553	0.0301022	-1.42905	0.388125	Pttg1	One sex_Male only
6121	IMPC_DXA_001_001	Body weight	0.00362777	0.999991	0.782175	0.579329	37	6	5.35798e-07	1.81355e-08	0.203647	1.25913e-05	2.55711e-07	0.503759	0.000265913	-1.47456	0.00234196	-1.143	0.000234622	-1.77174	0.0318599	0.00412154	0.825768	0.90099	0.76862	7.72156e-08	1.27208	9.65073e-07	0.314412	0.643335	0.721547	Pttg1	Genotype effect with no sex effect(real)
9223	IMPC_GRS_003_001	Body weight	0.00819921	0.997419	0.919361	0.98722	38	6	7.08288e-06	5.75151e-10	0.185258	9.83083e-05	1.62193e-08	0.492857	0.00206603	-1.21234	0.0110747	-0.871337	0.000530511	-1.48293	0.0975955	0.0064851	0.833258	0.911249	0.779908	6.82683e-09	1.3379	2.1945e-07	0.168026	0.726307	0.560088	Pttg1	Genotype effect with no sex effect(real)
12125	IMPC_IPG_001_001	Body Weight	0.00352477	0.980752	0.984457	0.999138	34	6	1.51444e-05	2.08128e-08	0.380748	0.000152526	2.66783e-07	0.62425	0.0015505	-1.23662	0.0104442	-0.954841	0.00136482	-1.37161	0.0975955	0.00928077	0.835752	0.9104	0.793455	5.39099e-07	1.24766	3.85882e-06	0.0691515	0.830893	0.559713	Pttg1	Genotype effect with no sex effect(real)
2315	IMPC_BWT_001_001	Body weight	0.00222187	1	0.820863	0.632485	40	6	0.210527	0.0673819	0.140818	0.784777	0.185881	0.937495	0.223346	0.52699	0.679829	0.264117	0.165797	0.789864	0.985589	0.831471	1.07842	1.01211	1.14119	0.158071	0.445016	0.40673	0.176526	0.970762	0.572002	Rock1	Not significant
9224	IMPC_GRS_003_001	Body weight	0.0247356	1	0.680045	0.565033	39	6	0.904047	4.176e-11	0.400281	0.965708	2.04044e-09	0.937495	0.978085	0.012004	0.517491	0.251652	0.634358	-0.187027	0.985589	0.890024	0.989943	1.00583	0.982633	3.70979e-09	1.58405	2.89363e-07	0.0116445	1.14537	0.267523	Rock1	Not significant
11721	IMPC_HWT_007_001	Body weight	0.00885453	0.999999	0.991212	0.747239	40	6	0.911387	3.53627e-10	0.683687	0.965708	8.08291e-09	0.937495	0.94375	0.0307681	0.731077	0.143303	0.842091	-0.0817669	0.985589	0.911881	0.982384	0.976689	0.987028	2.37206e-08	1.49833	4.49456e-07	0.0315041	1.27326	0.313072	Rock1	Not significant
12126	IMPC_IPG_001_001	Body Weight	0.0199031	0.995834	0.922892	0.325455	35	6	0.49014	3.15297e-09	0.624651	0.911268	3.36316e-08	0.937495	0.562808	-0.252901	0.434023	-0.326637	0.889176	-0.0577027	0.985589	0.937768	0.965084	0.94944	0.99377	2.91006e-07	1.41707	2.83731e-06	0.0365496	1.68601	0.341846	Rock1	Not significant
2316	IMPC_BWT_001_001	Body weight	0.000884832	1	0.828939	0.528455	40	6	0.749912	0.12584	0.480417	0.880062	0.336145	0.833107	0.756574	-0.135221	0.909192	-0.0742808	0.73764	-0.196161	0.980049	0.946554	0.971216	0.956667	0.984986	0.155833	0.448004	0.485567	0.728372	0.326124	0.891628	Sra1	Not significant
9225	IMPC_GRS_003_001	Body weight	0.174605	1	0.966257	0.0191992	39	6	0.00392899	1.28103e-07	0.868507	0.0328186	2.02118e-06	0.978793	0.0400923	-0.875418	0.0137019	-0.811411	0.0898173	-0.905461	0.138976	0.507571	0.832357	0.826512	0.841423	2.6568e-09	1.32457	3.30971e-07	0.357656	1.23052	0.717927	Sra1	Genotype effect with no sex effect(real)
11722	IMPC_HWT_007_001	Body weight	0.268706	1	0.998819	0.727488	40	6	0.00153971	7.40687e-11	0.0367846	0.0286547	5.25888e-09	0.319883	0.0642385	-0.791836	0.000374068	-1.3173	0.52225	-0.26637	0.0242026	0.905717	0.871159	0.75811	0.963339	1.22926e-08	1.30808	4.36386e-07	0.0153638	2.35901	0.235812	Sra1	One sex_Female only
12127	IMPC_IPG_001_001	Body Weight	0.15999	0.999985	0.860263	0.293302	34	6	0.069571	3.06665e-10	0.0486792	0.209495	1.08866e-08	0.319883	0.198782	-0.564836	0.00411122	-0.978589	0.981445	0.0096798	0.0590455	0.992346	0.88799	0.811432	0.970357	6.99235e-09	1.36649	3.30971e-07	0.0435294	2.35475	0.259351	Sra1	Interaction_One sex_Female only2
1	IMPC_ABR_001_001	Body weight	0.0600245	0.999998	0.758535	0.805465	16	6	0.0256673	0.000362131	0.0862775	0.126362	0.00243962	0.567149	0.125054	-0.713253	0.651044	-0.212447	0.0195218	-1.21406	0.863434	0.156544	0.908483	0.958734	0.867105	0.000251834	1.52211	0.00189616	0.43439	0.520503	0.689059	Ulk3	Genotype effect with no sex effect(real)
6122	IMPC_DXA_001_001	Body weight	0.0032711	0.999999	0.947066	0.138561	37	6	0.000323059	2.60052e-07	0.0157607	0.0206758	3.02606e-06	0.214913	0.0150522	-1.02789	0.418066	-0.314668	0.000975005	-1.70386	0.7135	0.0312002	0.86903	0.942008	0.813925	1.23517e-07	1.37876	2.03184e-06	0.989064	-0.0104249	0.998299	Ulk3	One sex_Male only
9226	IMPC_GRS_003_001	Body weight	0.0220751	0.999999	0.76133	0.565087	39	6	0.228782	5.3054e-11	0.564596	0.464826	3.39545e-09	0.737431	0.443499	-0.333629	0.674558	-0.16477	0.234612	-0.46254	0.863434	0.590086	0.954023	0.965079	0.950352	5.58964e-09	1.55796	2.38491e-07	0.00140419	1.26019	0.0599122	Ulk3	Not significant
11723	IMPC_HWT_007_001	Body weight	0.00985191	0.999996	0.993652	0.7307	40	6	0.333992	8.85107e-10	0.299046	0.532681	1.88823e-08	0.58889	0.53341	-0.270855	0.967968	0.0171264	0.170916	-0.558837	0.978064	0.532742	0.948209	0.964239	0.935138	1.63028e-08	1.52166	5.21688e-07	0.0756042	0.945698	0.35842	Ulk3	Not significant
12128	IMPC_IPG_001_001	Body Weight	0.0373309	0.999998	0.998642	0.499438	35	6	0.308154	9.78518e-09	0.173951	0.532681	1.78929e-07	0.58889	0.423613	-0.350709	0.830847	0.0947784	0.101819	-0.663928	0.908961	0.465457	0.950094	0.994651	0.930034	1.2699e-07	1.54314	2.03184e-06	0.088328	0.78443	0.363873	Ulk3	Not significant
2317	IMPC_BWT_001_001	Body weight	3.84371e-05	1	0.929234	0.917136	40	6	1.93622e-06	0.121548	0.550105	0.000276879	0.304936	0.810979	3.65564e-06	1.79541	0.000943062	1.98823	0.00130202	1.60259	0.067429	0.130901	1.56179	1.56146	1.56209	0.127657	0.391881	0.407872	0.9874	0.00624662	0.994953	Ywhaz	Genotype effect with no sex effect(real)
6123	IMPC_DXA_001_001	Body weight	0.0104302	0.999995	0.855421	0.861102	37	6	0.45745	8.67158e-10	0.878885	0.70339	1.98597e-08	0.937915	0.675099	0.183429	0.548771	0.245115	0.695806	0.161973	0.889567	0.912846	1.01068	0.995757	1.0279	7.8906e-08	1.48852	1.41044e-06	0.0188724	1.40538	0.199971	Ywhaz	Not significant
9227	IMPC_GRS_003_001	Body weight	0.0146374	0.999998	0.640672	0.572923	39	6	0.381992	4.14197e-11	0.824012	0.633351	1.97434e-09	0.91344	0.633098	0.208258	0.66257	0.169936	0.466598	0.285323	0.90439	0.82975	1.01293	0.991163	1.03557	6.04816e-09	1.51099	2.88296e-07	0.0200865	1.62638	0.199971	Ywhaz	Not significant
11724	IMPC_HWT_007_001	Body weight	0.0112373	1	0.991003	0.746868	40	6	0.874124	2.65114e-10	0.624686	0.919116	7.58226e-09	0.818252	0.920484	-0.0435448	0.668105	-0.177821	0.823807	0.0907316	0.90439	0.932272	1.0004	0.979456	1.01748	2.10303e-08	1.44107	5.01223e-07	0.0463387	1.70962	0.288106	Ywhaz	Not significant
12129	IMPC_IPG_001_001	Body Weight	0.0200562	0.999998	0.99677	0.339855	35	6	0.352734	2.83715e-09	0.930076	0.615134	4.50792e-08	0.956841	0.660226	0.193254	0.583635	0.232123	0.494387	0.280314	0.889567	0.849866	1.01148	0.999495	1.038	2.16122e-07	1.46918	3.43394e-06	0.0282505	1.51737	0.230133	Ywhaz	Not significant
38	IMPC_CAL_002_001	Body weight after experiment	0.0461475	1	0.697198	0.732971	34	6	0.0222787	5.25082e-10	0.615409	0.151309	9.50982e-09	0.842528	0.148794	0.634307	0.072115	0.713486	0.222945	0.46317	0.435361	0.790001	1.05554	1.08337	1.02034	2.40161e-09	1.56329	1.87325e-07	0.123024	1.31297	0.39008	A2m	Genotype effect with no sex effect(real)
381	IMPC_CAL_002_001	Body weight after experiment	0.0110965	1	0.505261	0.99012	35	6	0.262659	9.72152e-10	0.907724	0.543227	2.21165e-08	0.959047	0.463026	0.322265	0.406746	0.331703	0.511478	0.269903	0.861375	0.841098	1.03255	1.01791	1.03814	8.60436e-08	1.50229	1.67307e-06	0.022612	1.44049	0.293957	Ahcy	Not significant
382	IMPC_CAL_002_001	Body weight after experiment	0.0452888	1	0.654729	0.986136	35	6	0.161266	9.41386e-10	0.75068	0.367346	2.51036e-08	0.81315	0.421099	-0.352919	0.469859	-0.290833	0.255734	-0.458516	0.638108	0.73067	0.949992	0.948723	0.945443	6.71016e-08	1.52289	1.46665e-06	0.0131001	1.35521	0.156298	Atp5b	Not significant
383	IMPC_CAL_002_001	Body weight after experiment	0.00742062	1	0.473085	0.999352	35	6	0.468653	1.42771e-08	0.60235	0.64185	1.68648e-07	0.785132	0.669198	-0.188051	0.886484	-0.0599243	0.423128	-0.358195	0.91775	0.772673	0.969863	0.983396	0.953427	1.65795e-07	1.47057	2.32112e-06	0.163158	1.1723	0.550478	Atp6v0d1	Not significant
384	IMPC_CAL_002_001	Body weight after experiment	0.0446322	1	0.467739	0.991384	35	6	0.100116	1.29284e-09	0.657292	0.229342	2.01467e-08	0.875482	0.290854	0.462097	0.156719	0.55725	0.435605	0.323528	0.457914	0.649544	1.04397	1.05428	1.02966	2.32056e-08	1.5196	4.68327e-07	0.0890446	1.28587	0.366072	C8a	Not significant
385	IMPC_CAL_002_001	Body weight after experiment	0.0398633	1	0.669155	0.986136	35	6	0.190573	9.49439e-10	0.694104	0.360431	1.83558e-08	0.896279	0.453573	-0.329065	0.540935	-0.246794	0.259513	-0.455021	0.817476	0.567273	0.955291	0.965824	0.941325	6.50421e-08	1.52895	9.99284e-07	0.0150073	1.32072	0.286138	Cdk4	Not significant
386	IMPC_CAL_002_001	Body weight after experiment	0.0174463	1	0.799006	0.999954	35	6	0.656205	9.98733e-09	0.0405186	0.723908	2.7972e-07	0.238047	0.808616	-0.106694	0.294257	0.440432	0.0963037	-0.699629	0.546478	0.25146	0.960939	1.0369	0.894914	3.6241e-08	1.60329	7.32875e-07	0.286678	0.463226	0.935057	Dhfr	Interaction_cannot classify2
387	IMPC_CAL_002_001	Body weight after experiment	0.0117251	0.965231	0.929918	0.297745	33	6	0.0087241	1.3079e-05	0.577015	0.0725478	0.000103324	0.852041	0.0456337	-0.784187	0.0319888	-0.611193	0.0933332	-0.922827	0.192565	0.546172	0.896902	0.935881	0.870626	1.36705e-07	1.13374	2.3088e-06	0.521708	0.822101	0.787578	Dync1li1	Genotype effect with no sex effect(real)
388	IMPC_CAL_002_001	Body weight after experiment	0.0315064	0.998233	0.910953	0.971568	34	6	0.031916	7.85245e-10	0.699598	0.113281	1.11746e-08	0.963115	0.203206	-0.526725	0.0679233	-0.618659	0.276912	-0.43479	0.3222	0.655139	0.941247	0.934766	0.946441	9.49308e-08	1.40316	1.29982e-06	0.000530403	1.58703	0.0868056	G6pd2	Genotype effect with no sex effect(real)
389	IMPC_CAL_002_001	Body weight after experiment	0.0180954	0.998233	0.812591	0.969843	34	6	0.0691459	5.91806e-10	0.483076	0.205207	7.77802e-09	0.67843	0.282012	-0.446687	0.0667613	-0.615001	0.48865	-0.278374	0.261364	0.817609	0.966596	0.934143	0.992602	1.33698e-07	1.38646	1.89235e-06	0.000308771	1.72309	0.020686	Galc	Not significant
3810	IMPC_CAL_002_001	Body weight after experiment	0.155408	1	0.578056	0.969843	35	6	0.00811823	5.36279e-11	0.285733	0.0392381	7.06913e-10	0.692068	0.130594	-0.656401	0.0110672	-0.936961	0.295483	-0.416902	0.0615461	0.630074	0.916524	0.862119	0.954425	3.38059e-08	1.43715	4.19132e-07	0.00393766	1.95721	0.038064	Iqgap1	Genotype effect with no sex effect(real)
3811	IMPC_CAL_002_001	Body weight after experiment	0.0295933	1	0.542533	0.984303	35	6	0.537209	7.34639e-10	0.226033	0.687241	2.08637e-08	0.445787	0.743536	-0.144075	0.218568	-0.48539	0.70055	0.15698	0.738005	0.83244	0.99587	0.957822	1.0203	4.18109e-08	1.40914	1.18743e-06	0.0459291	2.05151	0.248806	Lmbrd1	Not significant
3812	IMPC_CAL_002_001	Body weight after experiment	0.0199189	0.998233	0.771717	0.984303	34	6	0.435072	7.98839e-10	0.861908	0.864183	1.38825e-08	0.961359	0.63813	-0.196501	0.663943	-0.152885	0.555232	-0.240116	0.816667	0.822934	0.99243	0.997509	0.98836	8.14865e-08	1.44344	1.26757e-06	0.0262871	1.35621	0.152465	Mfap4	Not significant
3813	IMPC_CAL_002_001	Body weight after experiment	0.01104	0.998233	0.505261	0.999466	34	6	0.0168107	1.26929e-09	0.463279	0.162521	1.5972e-08	0.713827	0.125261	0.63153	0.293658	0.417527	0.0239432	0.765505	0.62956	0.430222	1.07145	1.03595	1.08732	8.13928e-08	1.36047	1.50577e-06	0.0109993	1.70845	0.14606	Mmachc	Genotype effect with no sex effect(real)
3814	IMPC_CAL_002_001	Body weight after experiment	0.0946582	1	0.505261	0.99012	35	6	0.833093	9.72152e-10	0.277652	0.895434	1.53506e-08	0.511384	0.858779	0.0783912	0.561265	-0.233383	0.392686	0.349893	0.804126	0.643616	1.02697	0.971943	1.06471	2.2119e-08	1.40957	3.76023e-07	0.0755799	1.99284	0.24461	Mvk	Not significant
3815	IMPC_CAL_002_001	Body weight after experiment	0.0176477	1	0.542533	0.984303	35	6	0.022697	7.34639e-10	0.153518	0.131979	1.04853e-08	0.680203	0.157259	0.615234	0.550052	0.239492	0.0109557	0.95116	0.884658	0.0905283	1.07787	1.01572	1.12098	5.57886e-08	1.39357	7.70896e-07	0.00963645	2.10523	0.110098	Npc2	Genotype effect with no sex effect(real)
3816	IMPC_CAL_002_001	Body weight after experiment	0.0126736	1	0.505261	0.99012	35	6	0.0458817	9.72152e-10	0.0773036	0.175291	9.05317e-09	0.334168	0.208209	0.548917	0.838	0.0824618	0.00956155	0.976494	0.958438	0.126019	1.05974	0.993437	1.10626	9.75912e-08	1.3607	1.18736e-06	0.00879656	2.25473	0.091331	Pebp1	Genotype effect with no sex effect(real)
3817	IMPC_CAL_002_001	Body weight after experiment	0.0420391	1	0.9165	0.999955	35	6	0.012108	4.41255e-09	0.123806	0.0841794	5.85666e-08	0.629684	0.0934826	0.725809	0.00463052	1.11447	0.506543	0.293567	0.123891	0.911597	1.11668	1.21806	1.02953	4.70771e-08	1.52548	8.2385e-07	0.152215	0.704579	0.598503	Phyh	Genotype effect with no sex effect(real)
3818	IMPC_CAL_002_001	Body weight after experiment	0.010576	0.998233	0.624637	0.93686	34	6	0.0293769	7.02666e-08	0.315571	0.0692768	1.23895e-06	0.51047	0.148644	-0.596022	0.35633	-0.331202	0.0595092	-0.860842	0.686586	0.159364	0.929265	0.959053	0.905394	1.29065e-07	1.39442	1.22612e-06	0.242527	0.864782	0.934618	Plk1	Genotype effect with no sex effect(real)
3819	IMPC_CAL_002_001	Body weight after experiment	0.0679016	1	0.780803	0.984395	35	6	0.0480411	1.22687e-09	0.824916	0.204589	1.95363e-08	0.897652	0.248394	-0.504268	0.243367	-0.468442	0.14517	-0.583247	0.704694	0.488766	0.939882	0.960646	0.91787	1.68127e-08	1.51036	4.03505e-07	0.0782183	1.39555	0.286165	Pmm2	Genotype effect with no sex effect(real)
3820	IMPC_CAL_002_001	Body weight after experiment	0.00302047	0.998233	0.537068	0.931882	34	6	6.08302e-05	1.84858e-06	0.0990561	0.000428853	1.0426e-05	0.377484	0.0052675	-1.10933	0.0630767	-0.704881	0.000572215	-1.51377	0.328919	0.0064851	0.853356	0.941149	0.783003	2.91301e-07	1.32648	2.33041e-06	0.106334	0.517588	0.559713	Pttg1	Genotype effect with no sex effect(real)
3821	IMPC_CAL_002_001	Body weight after experiment	0.0230176	1	0.630152	0.991959	35	6	0.542356	1.25088e-09	0.526044	0.911268	2.00141e-08	0.937495	0.743218	-0.14426	0.989771	0.00521303	0.41178	-0.337753	0.995996	0.831471	0.981368	0.989201	0.969397	7.49489e-08	1.54073	1.1692e-06	0.0305136	1.19776	0.313072	Rock1	Not significant
3822	IMPC_CAL_002_001	Body weight after experiment	0.14158	1	0.70502	0.971568	35	6	0.0177987	1.12618e-10	0.213293	0.0927361	5.33057e-09	0.630278	0.172241	-0.594309	0.0132784	-0.924029	0.449502	-0.30505	0.138976	0.905717	0.904741	0.83027	0.958667	2.42894e-08	1.41615	6.72553e-07	0.0204459	2.03513	0.241943	Sra1	Genotype effect with no sex effect(real)
3823	IMPC_CAL_002_001	Body weight after experiment	0.0198742	1	0.505261	0.99012	35	6	0.149238	9.72152e-10	0.949175	0.38802	1.98597e-08	0.962638	0.353168	0.406859	0.355257	0.368782	0.323888	0.40243	0.691928	0.788389	1.04433	1.03172	1.04825	3.9989e-08	1.48771	8.16919e-07	0.0555934	1.52136	0.317994	Ywhaz	Not significant
37	IMPC_CAL_001_001	Body weight before experiment	0.00767604	1	0.82601	0.713953	35	6	0.0340626	6.94548e-10	0.814824	0.205637	1.13211e-08	0.910757	0.186678	0.575119	0.120539	0.612962	0.209001	0.493956	0.548052	0.790001	1.04733	1.07086	1.02256	4.28898e-09	1.51621	2.23027e-07	0.11407	1.39721	0.39008	A2m	Genotype effect with no sex effect(real)
371	IMPC_CAL_001_001	Body weight before experiment	0.00733775	1	0.670733	0.567086	35	6	0.062555	2.4101e-10	0.986792	0.349425	7.31064e-09	0.992244	0.253127	0.49914	0.216286	0.481516	0.217631	0.473207	0.846283	0.7111	1.05133	1.04464	1.05088	1.05278e-08	1.52451	4.60592e-07	0.0389917	1.5162	0.385859	Ahcy	Not significant
372	IMPC_CAL_001_001	Body weight before experiment	0.0058028	1	0.674711	0.567086	35	6	0.0325351	5.11274e-11	0.395643	0.2169	2.72679e-09	0.652607	0.231127	-0.522697	0.0458794	-0.753146	0.389121	-0.334231	0.270583	0.857444	0.958015	0.939612	0.967513	1.62783e-08	1.46943	8.30194e-07	0.0156728	1.88835	0.156728	Atp5b	Genotype effect with no sex effect(real)
373	IMPC_CAL_001_001	Body weight before experiment	0.00248797	1	0.789368	0.961578	35	6	0.0546638	1.16167e-09	0.621884	0.156615	4.34278e-08	0.791932	0.262756	-0.489245	0.107506	-0.637972	0.344658	-0.382132	0.285716	0.708047	0.958083	0.953065	0.9568	2.52871e-08	1.4565	6.57464e-07	0.0555563	1.71234	0.550478	Atp6v0d1	Not significant
374	IMPC_CAL_001_001	Body weight before experiment	0.0285374	1	0.670733	0.567086	35	6	0.0292654	2.4101e-10	0.992549	0.116439	5.63361e-09	0.992549	0.185795	0.576247	0.149809	0.556791	0.146924	0.552177	0.451844	0.480868	1.08276	1.06441	1.09151	6.52301e-09	1.52342	2.42656e-07	0.0434335	1.51881	0.240636	C8a	Genotype effect with no sex effect(real)
375	IMPC_CAL_001_001	Body weight before experiment	0.0327279	1	0.796104	0.564288	35	6	0.0366093	3.19049e-10	0.80185	0.13	1.11029e-08	0.935887	0.238405	-0.514774	0.122963	-0.598983	0.219685	-0.473601	0.356593	0.553988	0.942827	0.954594	0.928108	8.24533e-09	1.50628	2.78692e-07	0.044721	1.63167	0.286138	Cdk4	Genotype effect with no sex effect(real)
376	IMPC_CAL_001_001	Body weight before experiment	0.00155709	1	0.557952	0.992312	35	6	0.0289453	6.25217e-08	0.0651109	0.0812198	8.39577e-07	0.284671	0.15788	-0.614184	0.768963	-0.126832	0.00698827	-1.14539	0.881803	0.0625616	0.910261	0.980431	0.848682	4.8507e-08	1.53473	8.82828e-07	0.373315	0.516174	0.935057	Dhfr	Genotype effect with no sex effect(real)
377	IMPC_CAL_001_001	Body weight before experiment	0.0226312	1	0.949124	0.0192265	35	6	0.00189007	2.4057e-05	0.354405	0.0497719	0.000161538	0.737697	0.0198635	-0.990987	0.0244845	-0.727336	0.0358605	-1.29	0.175843	0.354123	0.901754	0.925699	0.877454	8.19763e-09	1.23787	4.15347e-07	0.653092	0.675197	0.834556	Dync1li1	Genotype effect with no sex effect(real)
378	IMPC_CAL_001_001	Body weight before experiment	0.00853322	1	0.675754	0.567086	35	6	0.00507424	1.65884e-11	0.246244	0.0302818	7.67215e-10	0.893578	0.117857	-0.678206	0.0071944	-0.972628	0.269939	-0.425263	0.102382	0.655139	0.944126	0.919431	0.95877	1.41552e-08	1.45177	3.30298e-07	0.00303947	1.99913	0.119725	G6pd2	Genotype effect with no sex effect(real)
379	IMPC_CAL_001_001	Body weight before experiment	0.0974492	1	0.594519	0.866837	35	6	0.000573578	7.41216e-10	0.86282	0.00488907	1.65847e-08	0.9595	0.0316337	-0.919103	0.0201991	-0.895734	0.0244651	-0.983246	0.124677	0.141266	0.844104	0.802477	0.872941	1.15059e-08	1.42708	2.23726e-07	0.136315	1.33957	0.759901	Idh1	Genotype effect with no sex effect(real)
3710	IMPC_CAL_001_001	Body weight before experiment	0.16166	1	0.796997	0.564288	35	6	0.00015301	2.26565e-12	0.121095	0.00144054	8.21297e-11	0.665748	0.0366823	-0.895003	0.000190746	-1.25354	0.130378	-0.57728	0.00931841	0.461092	0.891242	0.852163	0.917764	4.33432e-09	1.42837	9.25825e-08	0.000422071	2.10463	0.0233897	Iqgap1	Genotype effect with no sex effect(real)
3711	IMPC_CAL_001_001	Body weight before experiment	0.0175754	0.995347	0.673298	0.777603	34	6	0.583834	2.78017e-10	0.107337	0.705068	1.34798e-08	0.364058	0.826214	-0.09175	0.180766	-0.519622	0.445079	0.257383	0.733392	0.625755	0.984025	0.915456	1.02861	3.0599e-08	1.33856	1.08626e-06	0.0260433	2.11557	0.228741	Lmbrd1	Not significant
3712	IMPC_CAL_001_001	Body weight before experiment	0.00428848	1	0.674822	0.554781	35	6	0.11361	1.02216e-10	0.138933	0.411835	3.09765e-09	0.592508	0.378371	-0.386074	0.0386449	-0.777133	0.927587	-0.035616	0.254705	0.990485	0.99147	0.955053	1.01529	1.65228e-08	1.421	5.78296e-07	0.0235418	2.16252	0.148416	Mfap4	Not significant
3713	IMPC_CAL_001_001	Body weight before experiment	0.00182285	0.997044	0.646783	0.816304	34	6	0.0845314	2.81075e-10	0.26773	0.289823	6.48084e-09	0.62991	0.267843	0.459578	0.68961	0.15835	0.0328365	0.680279	0.848404	0.430222	1.0482	1.00306	1.07308	6.77485e-08	1.36896	1.4324e-06	0.00486468	1.89089	0.142298	Mmachc	Not significant
3714	IMPC_CAL_001_001	Body weight before experiment	0.0160074	1	0.670982	0.567086	35	6	0.486481	2.41078e-10	0.950868	0.668042	6.34838e-09	0.981693	0.643749	0.20343	0.676153	0.165671	0.612859	0.19774	0.842837	0.780901	1.0228	0.996942	1.03795	1.13221e-08	1.52072	2.48997e-07	0.0732684	1.55279	0.24461	Mvk	Not significant
3715	IMPC_CAL_001_001	Body weight before experiment	0.00950632	1	0.675754	0.567086	35	6	0.00122192	6.86351e-12	0.00755174	0.019415	6.36944e-10	0.134987	0.160883	-0.60995	0.000170264	-1.25008	0.982956	-0.00837929	0.0121739	0.985215	0.963077	0.883963	1.02145	2.61576e-08	1.3496	7.16718e-07	0.000473188	2.5913	0.0205467	Nek2	One sex_Female only
3716	IMPC_CAL_001_001	Body weight before experiment	0.00578693	1	0.670982	0.567086	35	6	0.0172397	2.41078e-10	0.214643	0.112776	4.92394e-09	0.680203	0.150953	0.624233	0.441657	0.303432	0.0118292	0.904049	0.849771	0.0928595	1.06508	1.02859	1.08856	1.4603e-08	1.43446	3.84444e-07	0.0130958	2.03507	0.110098	Npc2	Genotype effect with no sex effect(real)
3717	IMPC_CAL_001_001	Body weight before experiment	0.0138105	1	0.67323	0.567086	35	6	0.0436901	1.06529e-10	0.0215554	0.175291	1.44299e-09	0.152941	0.524801	0.279436	0.423039	-0.31587	0.0217838	0.835991	0.907226	0.159021	1.04634	0.96285	1.10777	1.64945e-08	1.35629	3.01025e-07	0.0199251	2.50816	0.0981484	Pebp1	One sex_Male only
3718	IMPC_CAL_001_001	Body weight before experiment	0.00431541	0.997574	0.998052	0.813988	34	6	0.00109345	1.48798e-08	0.0489607	0.0133037	1.67112e-07	0.510753	0.0225086	0.922037	0.00116461	1.36693	0.290129	0.393881	0.0566778	0.770162	1.1401	1.23554	1.05004	5.6372e-08	1.41549	8.76898e-07	0.312799	0.442438	0.742775	Phyh	One sex_Female only
3719	IMPC_CAL_001_001	Body weight before experiment	0.00273969	1	0.861703	0.0634675	35	6	7.35432e-05	3.02195e-08	0.000974652	0.00231259	3.67935e-07	0.0309129	0.0376612	-0.890614	0.953349	0.0220475	0.000318981	-1.84572	0.982879	0.00701757	0.889083	0.992509	0.800836	1.39486e-08	1.48559	3.41742e-07	0.632578	-0.38218	0.908603	Pipox	One sex_Male only
3720	IMPC_CAL_001_001	Body weight before experiment	0.00550163	1	0.86894	0.0141718	35	6	0.00599978	5.22093e-07	0.117708	0.0236991	4.74342e-06	0.329013	0.061316	-0.805554	0.268135	-0.384877	0.016956	-1.26749	0.596694	0.090219	0.914708	0.959486	0.873557	1.67288e-08	1.44398	3.17847e-07	0.580199	0.561366	0.998034	Plk1	Genotype effect with no sex effect(real)
3721	IMPC_CAL_001_001	Body weight before experiment	0.00646284	1	0.674822	0.567086	35	6	0.11741	2.42458e-10	0.910401	0.334331	7.27374e-09	0.934788	0.38345	-0.382101	0.269102	-0.432433	0.332242	-0.375237	0.720809	0.606651	0.969919	0.965754	0.967882	2.29195e-08	1.52139	4.71486e-07	0.0179075	1.57859	0.150796	Pmm2	Not significant
3722	IMPC_CAL_001_001	Body weight before experiment	0.00230343	1	0.750501	0.982147	35	6	1.04999e-07	6.46635e-11	0.863353	2.96097e-06	4.55877e-09	0.957851	0.000771769	-1.37902	0.000172327	-1.36066	0.000829882	-1.43606	0.00607453	0.00705399	0.854777	0.915609	0.801027	9.6816e-09	1.35364	2.1945e-07	0.0304782	1.27824	0.388125	Pttg1	Genotype effect with no sex effect(real)
3723	IMPC_CAL_001_001	Body weight before experiment	0.00436005	1	0.794577	0.555192	35	6	0.369461	3.17697e-10	0.820519	0.911268	8.08291e-09	0.941181	0.627236	-0.213593	0.459539	-0.294276	0.654427	-0.175911	0.985589	0.894943	0.986749	0.980584	0.98623	1.63188e-08	1.50501	4.49456e-07	0.0614572	1.62338	0.379337	Rock1	Not significant
24	IMPC_BWT_008_001-10	Body weight curve	0.00476951	1	0.85805	0.930249	34	6	0.918086	3.61818e-09	0.271518	0.960178	6.34088e-08	0.607403	0.870801	-0.0717994	0.501116	0.276178	0.433936	-0.32775	0.651451	0.772673	0.975361	1.01089	0.958462	9.23408e-08	1.56447	1.86734e-06	0.083091	0.960543	0.550478	Atp6v0d1	Not significant
25	IMPC_BWT_008_001-11	Body weight curve	0.00210342	0.995792	0.990462	0.995054	35	6	0.0289354	3.69046e-09	0.89508	0.108687	6.34088e-08	0.966687	0.158197	-0.581662	0.0952103	-0.595006	0.202713	-0.529125	0.277316	0.583414	0.941978	0.947027	0.942965	4.21681e-08	1.37174	9.59325e-07	0.0790637	1.43762	0.550478	Atp6v0d1	Genotype effect with no sex effect(real)
27	IMPC_BWT_008_001-13	Body weight curve	0.00626879	0.999995	0.981039	0.97311	37	6	0.011201	1.60844e-09	0.21144	0.0604855	4.34278e-08	0.580369	0.0758114	-0.763052	0.00756126	-1.04161	0.383155	-0.377836	0.0860094	0.747641	0.919002	0.897973	0.949381	2.00113e-07	1.31549	2.50244e-06	0.0259609	1.97926	0.449558	Atp6v0d1	Genotype effect with no sex effect(real)
29	IMPC_BWT_008_001-15	Body weight curve	0.0031574	0.999996	0.961104	0.967467	33	6	0.238512	8.14667e-09	0.811841	0.387612	1.12734e-07	0.907917	0.42866	-0.348437	0.345015	-0.391955	0.53643	-0.261355	0.565375	0.841627	0.94615	0.949905	0.948723	2.06245e-07	1.43763	2.50244e-06	0.0862565	1.56823	0.550478	Atp6v0d1	Not significant
30	IMPC_BWT_008_001-16	Body weight curve	0.0380294	1	1	0.991387	31	6	0.695283	1.79697e-07	0.123765	0.824019	1.68761e-06	0.580369	0.832802	-0.0938998	0.469278	0.330829	0.186562	-0.56825	0.618903	0.576441	0.96978	1.00818	0.932684	1.45729e-06	1.53826	1.32613e-05	0.147403	0.639182	0.550478	Atp6v0d1	Not significant
35	IMPC_BWT_008_001-8	Body weight curve	0.0620643	1	0.603173	0.125277	29	6	2.37977e-07	1.18193e-07	6.40713e-05	7.49627e-06	1.31403e-06	0.00201824	0.00168408	-1.30526	0.616208	-0.176204	7.0504e-06	-2.29263	0.764708	0.000636728	0.816967	1.00313	0.692024	1.5903e-07	1.36963	2.32112e-06	0.284192	-0.7468	0.646475	Atp6v0d1	One sex_Male only
36	IMPC_BWT_008_001-9	Body weight curve	0.0118547	1	0.983906	0.95304	36	6	0.824771	8.39935e-09	0.173152	0.917805	1.12734e-07	0.580369	0.956784	-0.023823	0.461085	0.320162	0.280532	-0.453499	0.61704	0.671147	0.99339	1.01878	0.962486	1.06031e-07	1.54244	1.92977e-06	0.116548	0.768782	0.550478	Atp6v0d1	Not significant
241	IMPC_BWT_008_001-10	Body weight curve	0.0421941	1	0.764734	0.818845	34	6	0.314833	9.99116e-10	0.385345	0.511134	2.00366e-08	0.71706	0.612185	0.223386	0.926306	0.0370141	0.217626	0.494504	0.988219	0.49578	1.04979	1.02023	1.0858	5.69129e-08	1.44069	8.14292e-07	0.0459856	1.89818	0.240636	C8a	Not significant
251	IMPC_BWT_008_001-11	Body weight curve	0.00143685	1	0.569973	0.203059	36	6	0.0115265	2.66494e-06	0.182557	0.0835248	1.84572e-05	0.559642	0.063607	-0.798136	0.326379	-0.397168	0.023302	-1.1991	0.670692	0.336273	0.915179	0.980094	0.862803	3.05032e-08	1.35052	4.728e-07	0.662579	0.548579	0.916795	C8a	Genotype effect with no sex effect(real)
26	IMPC_BWT_008_001-12	Body weight curve	0.0168516	1	0.373119	0.470903	22	6	0.172155	7.62488e-05	0.110585	0.335343	0.000419368	0.460267	0.26905	-0.502409	0.87493	0.0650836	0.0919323	-0.93778	0.988219	0.435102	0.922387	1.02287	0.861666	1.16939e-05	1.45334	7.25021e-05	0.663641	0.45048	0.916795	C8a	Not significant
271	IMPC_BWT_008_001-13	Body weight curve	0.0314061	0.999992	0.988832	0.731889	37	6	0.145528	1.88319e-09	0.328794	0.295801	2.5154e-08	0.677452	0.43264	0.342416	0.748656	0.134009	0.103892	0.663776	0.952371	0.448201	1.02248	0.989355	1.06431	1.09805e-07	1.3931	1.27649e-06	0.0292775	1.92286	0.240636	C8a	Not significant
28	IMPC_BWT_008_001-14	Body weight curve	0.0130797	0.999999	0.802368	0.21552	30	6	0.0113105	1.70206e-05	0.0332508	0.0835248	9.94641e-05	0.270344	0.0745838	-0.77632	0.958125	-0.0195606	0.0161407	-1.35042	0.988219	0.336273	0.889501	0.977668	0.841266	1.74069e-06	1.36992	1.47168e-05	0.970122	0.0390587	0.989393	C8a	One sex_Male only
291	IMPC_BWT_008_001-15	Body weight curve	0.00771363	0.960037	0.873982	0.92338	32	6	0.0629283	1.5933e-09	0.0187437	0.165741	2.2919e-08	0.254589	0.954319	-0.0239722	0.0962815	-0.564555	0.138684	0.593457	0.391596	0.480868	1.04044	0.966363	1.1128	2.79398e-07	1.22954	2.88711e-06	0.0204275	2.38756	0.222299	C8a	Interaction_cannot classify2
301	IMPC_BWT_008_001-16	Body weight curve	0.0158801	1	0.997308	0.264563	31	6	0.0445072	4.50712e-06	0.750357	0.140637	2.9738e-05	0.917103	0.163128	-0.611884	0.067832	-0.729299	0.331256	-0.534573	0.373076	0.576471	0.94672	0.949831	0.938578	2.37419e-06	1.24324	1.92e-05	0.261409	1.43796	0.714244	C8a	Genotype effect with no sex effect(real)
31	IMPC_BWT_008_001-4	Body weight curve	0.0140156	1	0.637141	0.825466	34	6	0.498257	0.00110124	0.613205	0.700557	0.00478909	0.862175	0.524618	-0.28024	0.89608	-0.0632878	0.481774	-0.43909	0.988219	0.694651	0.939698	0.966461	0.923861	0.00390096	0.987722	0.017697	0.161677	0.61192	0.524742	C8a	Not significant
32	IMPC_BWT_008_001-5	Body weight curve	0.20849	0.999999	0.386106	0.342809	34	6	0.133241	9.99437e-11	0.769742	0.282883	3.11491e-09	0.919755	0.337396	-0.420535	0.419336	-0.302283	0.239688	-0.446355	0.725558	0.49578	0.951724	0.976381	0.941758	3.67035e-09	1.57137	2.27561e-07	0.0661604	1.4273	0.284644	C8a	Not significant
33	IMPC_BWT_008_001-6	Body weight curve	0.0508942	1	0.392847	0.461057	35	6	0.816836	7.92913e-11	0.597396	0.903837	3.11491e-09	0.860413	0.853775	-0.081199	0.61021	-0.193989	0.846906	0.0747658	0.877764	0.93646	0.991903	0.974871	1.01121	5.77031e-09	1.51111	2.42656e-07	0.0557622	1.77987	0.264513	C8a	Not significant
34	IMPC_BWT_008_001-7	Body weight curve	0.12507	1	0.516743	0.44412	30	6	0.617054	1.07147e-09	0.208993	0.786396	2.00366e-08	0.592146	0.956411	0.0243839	0.600179	-0.197304	0.263578	0.439589	0.87632	0.50638	0.998627	0.976479	1.04399	2.60294e-08	1.45138	4.68327e-07	0.0588596	2.08827	0.272225	C8a	Not significant
351	IMPC_BWT_008_001-8	Body weight curve	0.105395	1	0.700739	0.506385	29	6	0.393892	2.30861e-09	0.654819	0.579983	2.87806e-08	0.875482	0.754784	0.139646	0.789311	0.103235	0.40352	0.332268	0.988219	0.625455	1.01403	1.01998	1.03314	2.50309e-07	1.51003	2.73867e-06	0.0358343	1.73906	0.240636	C8a	Not significant
361	IMPC_BWT_008_001-9	Body weight curve	0.00290738	1	0.819878	0.993024	36	6	0.189426	7.44665e-07	0.0505802	0.361455	5.80218e-06	0.337804	0.38777	-0.377844	0.694279	0.177993	0.033066	-1.01498	0.920782	0.336273	0.928394	0.993935	0.865439	3.27834e-07	1.46329	3.20932e-06	0.715618	0.270319	0.916795	C8a	Not significant
242	IMPC_BWT_008_001-10	Body weight curve	0.016209	1	0.883083	0.848448	34	6	0.0347385	1.30866e-09	0.897907	0.13	2.07007e-08	0.959438	0.170013	-0.598308	0.132077	-0.587498	0.194612	-0.521985	0.370668	0.513067	0.938203	0.962069	0.930192	3.95267e-08	1.48127	7.42223e-07	0.0434891	1.54678	0.286138	Cdk4	Genotype effect with no sex effect(real)
252	IMPC_BWT_008_001-11	Body weight curve	0.0232028	1	0.993057	0.411238	36	6	0.0354164	6.83114e-10	0.70054	0.13	1.52769e-08	0.896279	0.201842	-0.555439	0.102559	-0.65424	0.246412	-0.456639	0.32446	0.567273	0.946381	0.957336	0.937542	1.65694e-08	1.46491	4.00032e-07	0.0465617	1.66251	0.286138	Cdk4	Genotype effect with no sex effect(real)
261	IMPC_BWT_008_001-12	Body weight curve	0.0567526	0.999999	0.499683	0.463198	22	6	0.0527552	4.23021e-08	0.68021	0.158266	3.68029e-07	0.896279	0.224055	-0.551014	0.322754	-0.380438	0.136066	-0.578172	0.597418	0.505075	0.951526	0.966119	0.958739	1.33513e-06	1.5776	1.18756e-05	0.058899	1.37987	0.310558	Cdk4	Not significant
272	IMPC_BWT_008_001-13	Body weight curve	0.0321169	0.999993	0.994497	0.634987	37	6	0.0553845	3.28006e-09	0.966463	0.163337	4.49357e-08	0.981142	0.173722	-0.589176	0.215192	-0.51946	0.190873	-0.542272	0.480044	0.513067	0.938503	0.93515	0.954572	8.80864e-08	1.43831	1.11131e-06	0.0513116	1.4155	0.288007	Cdk4	Not significant
281	IMPC_BWT_008_001-14	Body weight curve	0.0421184	0.999994	0.803507	0.807929	30	6	0.394297	1.07746e-08	0.271469	0.578066	1.17174e-07	0.761866	0.456132	-0.330536	0.862322	0.0701074	0.209463	-0.519881	0.950251	0.535979	0.954312	0.987747	0.951908	5.39185e-07	1.58474	5.36013e-06	0.00972469	0.99475	0.282016	Cdk4	Not significant
292	IMPC_BWT_008_001-15	Body weight curve	0.00900536	0.999997	0.995488	0.788945	33	6	0.00740276	5.72885e-09	0.904298	0.05367	6.64546e-08	0.959438	0.0918791	-0.730871	0.0654185	-0.739193	0.0897983	-0.678468	0.245569	0.475377	0.923961	0.91801	0.934213	9.62955e-08	1.45466	1.11131e-06	0.0305646	1.51539	0.286138	Cdk4	Genotype effect with no sex effect(real)
302	IMPC_BWT_008_001-16	Body weight curve	0.0468576	1	0.999895	0.128446	31	6	1.72705e-05	4.89214e-06	0.129394	0.00300507	3.15271e-05	0.638678	0.00114131	-1.34297	0.00931255	-0.947544	0.00177078	-1.77776	0.138479	0.117886	0.845938	0.895632	0.800354	1.97934e-06	1.22059	1.67254e-05	0.656119	0.390375	0.845664	Cdk4	Genotype effect with no sex effect(real)
311	IMPC_BWT_008_001-4	Body weight curve	0.100729	1	0.465509	0.703429	34	6	0.30459	0.000621778	0.750545	0.499988	0.00300526	0.926086	0.428751	0.348036	0.2774	0.493748	0.676936	0.262017	0.56125	0.812324	1.05	1.0656	1.04471	0.00282358	1.01479	0.0136338	0.0353927	0.783061	0.286138	Cdk4	Not significant
321	IMPC_BWT_008_001-5	Body weight curve	0.366799	0.999999	0.386106	0.342809	34	6	0.013506	1.48526e-11	0.640513	0.0783348	1.29217e-09	0.896279	0.135984	-0.647944	0.0453048	-0.712871	0.191231	-0.493997	0.23888	0.513067	0.934049	0.928123	0.948906	2.24291e-09	1.51334	1.26351e-07	0.0385386	1.73222	0.286138	Cdk4	Genotype effect with no sex effect(real)
331	IMPC_BWT_008_001-6	Body weight curve	0.0971156	1	0.355586	0.344136	35	6	0.0341424	5.91444e-11	0.531214	0.13	2.57278e-09	0.896279	0.212121	-0.544322	0.0627089	-0.672534	0.325867	-0.372988	0.245569	0.573179	0.955011	0.933008	0.978079	1.77437e-09	1.50925	1.26351e-07	0.0404885	1.8088	0.286138	Cdk4	Genotype effect with no sex effect(real)
341	IMPC_BWT_008_001-7	Body weight curve	0.0770489	1	0.516743	0.442275	30	6	0.0168826	1.06678e-09	0.775637	0.0851858	1.8562e-08	0.926086	0.113658	-0.692656	0.0633808	-0.659692	0.178691	-0.524397	0.245569	0.513067	0.924828	0.922684	0.952313	7.1036e-08	1.50917	1.00042e-06	0.0190658	1.64446	0.286138	Cdk4	Genotype effect with no sex effect(real)
362	IMPC_BWT_008_001-9	Body weight curve	0.0366557	0.999998	0.998898	0.618491	36	6	0.0200923	7.02385e-10	0.461134	0.0920017	1.52769e-08	0.896279	0.170476	-0.594741	0.0448215	-0.827998	0.280592	-0.439354	0.23888	0.567273	0.934474	0.928313	0.929881	9.86367e-08	1.40166	1.11131e-06	0.0277378	1.79031	0.286138	Cdk4	Genotype effect with no sex effect(real)
243	IMPC_BWT_008_001-10	Body weight curve	0.00310217	1	0.32271	0.239348	34	6	0.000527542	1.23889e-07	0.00204112	0.00545682	1.37007e-06	0.0295177	0.0663316	-0.792732	0.708337	0.150928	0.000908268	-1.64938	0.83687	0.0170754	0.882411	0.98797	0.808431	1.31702e-07	1.47928	1.55715e-06	0.632032	-0.321019	0.937226	Dhfr	One sex_Male only
253	IMPC_BWT_008_001-11	Body weight curve	0.0022034	1	0.8604	0.996074	36	6	0.00760344	6.03499e-08	0.241951	0.0319179	8.39577e-07	0.535098	0.0740977	-0.769642	0.297402	-0.449064	0.0112374	-1.09022	0.546739	0.0658682	0.900413	0.963751	0.849309	2.96008e-08	1.46302	6.73419e-07	0.317142	0.821866	0.935057	Dhfr	Genotype effect with no sex effect(real)
262	IMPC_BWT_008_001-12	Body weight curve	0.0123445	0.999999	0.212747	0.783317	22	6	0.00576023	4.18536e-05	0.0604959	0.0270731	0.000257635	0.277396	0.0421111	-0.897827	0.474024	-0.313684	0.0045217	-1.34742	0.667789	0.0472267	0.871472	0.958836	0.820041	5.25555e-06	1.48002	3.82604e-05	0.565284	0.446284	0.935057	Dhfr	Genotype effect with no sex effect(real)
273	IMPC_BWT_008_001-13	Body weight curve	0.00919647	0.999993	0.922492	0.456186	37	6	0.000200112	5.67697e-06	0.0517187	0.00313104	4.44398e-05	0.249311	0.0040064	-1.19888	0.138859	-0.602541	0.000589672	-1.6878	0.419042	0.0170359	0.857675	0.93229	0.80826	1.36893e-07	1.32471	1.55715e-06	0.767727	0.239449	0.937226	Dhfr	Genotype effect with no sex effect(real)
293	IMPC_BWT_008_001-15	Body weight curve	0.00406767	0.999999	0.953935	0.997753	33	6	0.0144807	1.07398e-07	0.245412	0.0486138	1.26192e-06	0.535098	0.0960258	-0.722347	0.383619	-0.382177	0.0159609	-1.01777	0.609541	0.0789647	0.889443	0.948518	0.847154	1.2687e-07	1.47677	1.55715e-06	0.265137	0.841178	0.935057	Dhfr	Genotype effect with no sex effect(real)
303	IMPC_BWT_008_001-16	Body weight curve	0.00843791	1	1	0.986187	31	6	0.000893928	1.95933e-08	0.925906	0.00622439	4.09282e-07	0.961383	0.0326768	-0.91972	0.0276704	-0.966054	0.0297668	-0.917207	0.186519	0.116587	0.883905	0.917688	0.851088	1.65185e-06	1.35843	1.43161e-05	0.0375155	1.40728	0.582781	Dhfr	Genotype effect with no sex effect(real)
312	IMPC_BWT_008_001-4	Body weight curve	0.0148529	1	0.946426	0.576906	34	6	0.00420038	0.00260581	0.00608554	0.0219353	0.0132403	0.0639499	0.0820937	-0.752635	0.462514	0.292767	0.011562	-1.74483	0.662816	0.0658682	0.79461	1.02342	0.602502	0.00336449	0.904595	0.0170094	0.210246	-1.133	0.878361	Dhfr	One sex_Male only
322	IMPC_BWT_008_001-5	Body weight curve	0.00237245	0.999999	0.253662	0.0686659	34	6	6.77961e-07	1.1903e-08	0.0438294	6.37283e-05	2.7972e-07	0.242351	0.000390276	-1.4416	0.00513189	-0.928575	9.36849e-05	-1.87459	0.127102	0.00587092	0.652497	0.703105	0.618102	3.4961e-09	1.36077	2.1883e-07	0.583387	0.414759	0.935057	Dhfr	Different size
332	IMPC_BWT_008_001-6	Body weight curve	0.0744686	1	0.827007	0.0131438	35	6	1.11332e-10	6.82273e-10	7.17214e-06	2.09304e-08	4.27558e-08	0.00134836	6.07536e-05	-1.59734	0.0703498	-0.521817	2.6254e-07	-2.63509	0.312284	4.93575e-05	0.779986	0.924635	0.668982	4.96014e-09	1.32191	2.25686e-07	0.0958483	-0.791369	0.699271	Dhfr	One sex_Male only
342	IMPC_BWT_008_001-7	Body weight curve	0.0696902	1	0.87663	0.0207273	30	6	1.10615e-05	3.28249e-07	0.000843657	0.000519889	3.42838e-06	0.0213376	0.00538722	-1.17282	0.581889	-0.162332	0.000232285	-1.99532	0.746577	0.0109174	0.843935	0.967803	0.769508	8.09971e-08	1.40991	1.22846e-06	0.613787	-0.42307	0.937226	Dhfr	One sex_Male only
363	IMPC_BWT_008_001-9	Body weight curve	0.00289515	1	0.786154	0.9261	36	6	0.000185851	2.4308e-08	0.662357	0.00313104	4.56991e-07	0.830154	0.0113452	-1.0693	0.0197832	-0.987709	0.00875502	-1.22454	0.150023	0.0649322	0.878441	0.911458	0.842501	2.57324e-07	1.32548	2.75489e-06	0.184992	1.08865	0.848258	Dhfr	Genotype effect with no sex effect(real)
244	IMPC_BWT_008_001-10	Body weight curve	0.00257475	1	0.684223	0.999987	34	6	0.0197335	1.83781e-08	0.443349	0.0849	1.88886e-07	0.926707	0.111627	-0.690727	0.282494	-0.441722	0.0452768	-0.852571	0.610864	0.414086	0.895787	0.935222	0.874828	1.68269e-07	1.48175	1.76188e-06	0.0644863	1.0709	0.397666	G6pd2	Genotype effect with no sex effect(real)
254	IMPC_BWT_008_001-11	Body weight curve	0.00724857	1	0.999776	0.0192376	36	6	0.000416805	3.10215e-08	0.418621	0.00974707	3.02051e-07	0.926707	0.0136529	-1.04393	0.0160871	-0.823045	0.016254	-1.26481	0.110227	0.250582	0.895081	0.918695	0.876028	3.34468e-08	1.35189	5.95353e-07	0.370344	0.910123	0.867025	G6pd2	Genotype effect with no sex effect(real)
263	IMPC_BWT_008_001-12	Body weight curve	0.0180593	1	0.49456	0.996825	22	6	0.0995184	5.75644e-07	0.183303	0.238574	3.67221e-06	0.893578	0.253812	-0.518118	0.822751	-0.0942852	0.0582836	-0.795985	0.922479	0.451366	0.921607	0.975373	0.89751	6.54706e-06	1.60563	4.01854e-05	0.111181	0.903931	0.489728	G6pd2	Not significant
274	IMPC_BWT_008_001-13	Body weight curve	0.019579	0.999994	0.995299	0.680291	37	6	0.00388888	5.78834e-10	0.492812	0.0284722	9.73493e-09	0.926707	0.0484104	-0.844392	0.0153327	-0.966341	0.141965	-0.611403	0.109098	0.57678	0.916693	0.910842	0.934513	9.22159e-08	1.36949	1.29982e-06	0.0220747	1.72443	0.255239	G6pd2	Genotype effect with no sex effect(real)
282	IMPC_BWT_008_001-14	Body weight curve	0.0393589	0.999999	0.929022	0.0814407	30	6	0.0211438	6.89604e-06	0.116211	0.0850347	3.75226e-05	0.841162	0.0637863	-0.805746	0.484255	-0.245779	0.028833	-1.17908	0.752833	0.31588	0.901747	0.960591	0.877487	7.10782e-07	1.39977	6.02472e-06	0.645338	0.466472	0.995159	G6pd2	Genotype effect with no sex effect(real)
294	IMPC_BWT_008_001-15	Body weight curve	0.00405025	0.999999	0.989709	0.833226	33	6	0.066612	1.17306e-08	0.974603	0.189588	1.27656e-07	0.986655	0.227729	-0.528175	0.235279	-0.497617	0.216502	-0.514812	0.549412	0.625827	0.929508	0.931877	0.933097	1.79093e-07	1.44939	1.77103e-06	0.0870338	1.43219	0.458973	G6pd2	Not significant
304	IMPC_BWT_008_001-16	Body weight curve	0.014484	1	0.998025	0.299628	31	6	0.000769564	4.57506e-07	0.714123	0.0101692	3.02761e-06	0.963115	0.0189971	-1.00266	0.00296324	-1.12526	0.0862689	-0.919436	0.0685249	0.504366	0.898582	0.903881	0.888938	2.03147e-06	1.22074	1.50667e-05	0.19586	1.42657	0.69681	G6pd2	Genotype effect with no sex effect(real)
313	IMPC_BWT_008_001-4	Body weight curve	0.130862	1	0.629095	0.911814	34	6	0.164142	0.00140734	0.909403	0.326519	0.00605482	0.986655	0.212995	-0.544343	0.343008	-0.475402	0.359751	-0.559043	0.654242	0.678481	0.922512	0.947719	0.90789	0.00403001	0.922122	0.0179336	0.335936	0.838481	0.817739	G6pd2	Not significant
323	IMPC_BWT_008_001-5	Body weight curve	0.421636	0.999999	0.64872	0.388075	34	6	0.000860334	5.11601e-12	0.887547	0.0106108	4.73231e-10	0.986655	0.0492861	-0.845262	0.0189293	-0.832143	0.0375024	-0.768893	0.120756	0.382047	0.900229	0.917483	0.895766	1.38596e-09	1.52128	9.2939e-08	0.0265263	1.58453	0.258282	G6pd2	Genotype effect with no sex effect(real)
333	IMPC_BWT_008_001-6	Body weight curve	0.0224513	1	0.355586	0.344136	35	6	0.019391	5.91444e-11	0.75655	0.0849	2.18834e-09	0.963115	0.171678	-0.59507	0.176972	-0.499174	0.0801627	-0.645988	0.49758	0.494336	0.932215	0.961402	0.914279	1.20284e-09	1.57426	9.2939e-08	0.0463856	1.42744	0.331749	G6pd2	Genotype effect with no sex effect(real)
343	IMPC_BWT_008_001-7	Body weight curve	0.0784264	1	0.516743	0.442275	30	6	0.11503	1.06678e-09	0.453317	0.262723	1.40967e-08	0.926707	0.257016	-0.500784	0.579507	-0.208458	0.134898	-0.579504	0.796431	0.57678	0.928299	0.958952	0.929943	1.02766e-07	1.60204	1.3066e-06	0.00771297	1.231	0.178362	G6pd2	Not significant
352	IMPC_BWT_008_001-8	Body weight curve	0.0983943	1	0.700739	0.518976	29	6	0.230791	2.32432e-09	0.269427	0.395337	2.86666e-08	0.893578	0.384587	-0.386867	0.949678	-0.0244138	0.135539	-0.580656	0.981511	0.57678	0.929249	0.969768	0.919635	1.92416e-07	1.63043	1.80263e-06	0.000938439	1.07419	0.0868056	G6pd2	Not significant
364	IMPC_BWT_008_001-9	Body weight curve	0.0491824	1	0.999699	0.619635	36	6	0.0105625	4.48839e-10	0.264996	0.0535699	8.30352e-09	0.893578	0.131839	-0.65306	0.0151439	-0.979968	0.322928	-0.402786	0.109098	0.655139	0.936642	0.897902	0.958573	1.16063e-07	1.3794	1.37728e-06	0.0124585	1.95658	0.230071	G6pd2	Genotype effect with no sex effect(real)
245	IMPC_BWT_008_001-10	Body weight curve	0.00582052	1	0.721595	0.844121	34	6	0.0798721	9.98029e-10	0.560663	0.227857	1.22425e-08	0.706588	0.248608	-0.504712	0.111866	-0.611764	0.442544	-0.312168	0.306097	0.809199	0.946076	0.922829	0.975821	9.99259e-08	1.45337	1.67149e-06	0.0170353	1.75297	0.0880632	Galc	Not significant
255	IMPC_BWT_008_001-11	Body weight curve	0.00536712	1	0.946908	0.472321	35	6	0.00801152	9.70705e-11	0.0584387	0.0640922	2.23262e-09	0.237568	0.102663	-0.686093	0.000953632	-1.11215	0.575931	-0.222322	0.0411708	0.835601	0.956902	0.914973	0.996077	6.74807e-08	1.31988	1.3796e-06	0.00213816	2.20971	0.0431485	Galc	Genotype effect with no sex effect(real)
264	IMPC_BWT_008_001-12	Body weight curve	0.0177137	0.999999	0.486728	0.479945	22	6	0.0668264	4.24516e-08	0.568762	0.205207	3.71957e-07	0.708377	0.245674	-0.526862	0.106972	-0.597247	0.420759	-0.322254	0.304708	0.809199	0.948392	0.934217	0.978107	6.75303e-06	1.47646	4.97023e-05	0.0147442	1.75145	0.0875914	Galc	Not significant
275	IMPC_BWT_008_001-13	Body weight curve	0.0121142	0.999589	0.973037	0.668567	37	6	0.0024162	2.35901e-10	0.161163	0.0341986	3.94599e-09	0.423628	0.0416806	-0.867198	0.00161494	-1.16319	0.266031	-0.46324	0.0411708	0.676871	0.927598	0.896543	0.966372	1.275e-07	1.33152	1.89235e-06	0.0015447	2.03148	0.0403829	Galc	Genotype effect with no sex effect(real)
283	IMPC_BWT_008_001-14	Body weight curve	0.0613194	0.999981	0.460582	0.928772	30	6	0.0593876	5.79333e-08	0.0294728	0.191707	4.63466e-07	0.169469	0.683614	0.18121	0.0204732	0.898082	0.483668	-0.317707	0.107999	0.817609	1.03522	1.14589	0.972577	4.0066e-07	1.63466	3.88008e-06	0.144395	0.418872	0.273378	Galc	Interaction_One sex_Female only2
295	IMPC_BWT_008_001-15	Body weight curve	0.0126456	1	0.999963	0.0455523	33	6	1.11414e-10	3.80977e-08	0.000231036	2.05002e-08	3.50499e-07	0.0106004	4.8673e-06	-1.76463	0.00148005	-0.910654	1.24441e-06	-2.58264	0.0411708	0.000228972	0.753143	0.862541	0.669544	1.87447e-07	1.1865	2.32064e-06	0.146247	-0.485491	0.273378	Galc	Different size
305	IMPC_BWT_008_001-16	Body weight curve	0.0452308	0.996668	0.975725	0.771972	31	6	0.00877054	3.14787e-09	0.0621489	0.0645511	3.21783e-08	0.243306	0.116799	-0.681519	0.00201379	-1.16994	0.574343	-0.234895	0.0411708	0.835601	0.943206	0.886807	0.983681	1.92819e-06	1.29559	1.68946e-05	0.0011202	2.23063	0.0403829	Galc	Genotype effect with no sex effect(real)
314	IMPC_BWT_008_001-4	Body weight curve	0.340196	1	0.889867	0.961184	34	6	0.0379836	0.000145733	0.187245	0.158292	0.000724727	0.452995	0.0786877	-0.760812	0.0101959	-1.18187	0.618293	-0.287583	0.0703707	0.875122	0.888329	0.806749	0.966004	0.00370422	0.886889	0.0174763	0.0161258	1.78118	0.0880632	Galc	Genotype effect with no sex effect(real)
324	IMPC_BWT_008_001-5	Body weight curve	0.400411	0.999999	0.386106	0.342809	34	6	0.00228702	4.9951e-12	0.0456343	0.0341986	3.06366e-10	0.220966	0.0726088	-0.775088	0.000141108	-1.17318	0.443659	-0.293934	0.0129819	0.809199	0.91357	0.865425	0.962735	9.31622e-09	1.41208	3.00751e-07	0.000285374	2.29133	0.020686	Galc	One sex_Female only
334	IMPC_BWT_008_001-6	Body weight curve	0.0818142	1	0.355586	0.344136	35	6	0.000764475	1.30474e-12	0.0638957	0.020465	1.20036e-10	0.244933	0.0571617	-0.818833	0.000119094	-1.19866	0.293534	-0.398037	0.0129819	0.701433	0.918361	0.87986	0.95439	2.77379e-09	1.43391	2.55189e-07	0.000339115	2.23454	0.020686	Galc	Genotype effect with no sex effect(real)
344	IMPC_BWT_008_001-7	Body weight curve	0.0744598	1	0.372705	0.442275	29	6	0.00159377	1.98616e-10	0.359084	0.0266593	3.94599e-09	0.596051	0.0376171	-0.872079	0.00159585	-0.95257	0.155863	-0.551782	0.0411708	0.550415	0.908669	0.894812	0.951352	1.89183e-07	1.39088	2.32064e-06	0.00367156	1.79167	0.0485325	Galc	Genotype effect with no sex effect(real)
353	IMPC_BWT_008_001-8	Body weight curve	0.088713	1	0.700739	0.518976	29	6	0.0322667	2.32432e-09	0.758614	0.141359	2.67297e-08	0.821088	0.162076	-0.616402	0.0952932	-0.613312	0.238693	-0.464151	0.301587	0.645875	0.924811	0.928945	0.943249	2.2132e-07	1.50162	2.3623e-06	0.01466	1.65078	0.0875914	Galc	Genotype effect with no sex effect(real)
365	IMPC_BWT_008_001-9	Body weight curve	0.0147401	0.999999	0.990101	0.647151	36	6	0.0909667	2.50759e-09	0.317502	0.237034	2.7141e-08	0.565312	0.33256	-0.423217	0.0759836	-0.730023	0.636847	-0.193713	0.268865	0.885672	0.964828	0.915508	0.99509	2.07399e-07	1.39143	2.3623e-06	0.0140096	1.92774	0.0875914	Galc	Not significant
246	IMPC_BWT_008_001-10	Body weight curve	0.0613684	1	0.691262	0.856399	34	6	0.000250915	5.21433e-09	0.760417	0.00299425	6.22243e-08	0.937055	0.0120125	-1.06388	0.0123118	-0.945359	0.0161208	-1.10181	0.0990644	0.13029	0.827029	0.797356	0.860508	6.61735e-08	1.37018	8.90797e-07	0.158586	1.21373	0.772941	Idh1	Genotype effect with no sex effect(real)
256	IMPC_BWT_008_001-11	Body weight curve	0.0439628	1	0.994462	0.0586127	36	6	7.24008e-09	2.13041e-08	0.000456176	1.29597e-06	2.2432e-07	0.0587397	8.88862e-05	-1.56832	0.042218	-0.697219	2.09672e-06	-2.43941	0.19377	0.000375312	0.715677	0.812545	0.637521	1.92085e-08	1.28375	3.36149e-07	0.471159	-0.458442	0.937479	Idh1	Different size
265	IMPC_BWT_008_001-12	Body weight curve	0.213916	1	0.423146	0.993484	22	6	0.000924269	8.98577e-07	0.559127	0.00636324	6.70189e-06	0.884758	0.0358349	-0.924826	0.0648857	-0.720667	0.0160943	-0.994008	0.227736	0.13029	0.843897	0.851393	0.854565	1.33156e-06	1.48475	9.70929e-06	0.100927	1.21141	0.752066	Idh1	Genotype effect with no sex effect(real)
276	IMPC_BWT_008_001-13	Body weight curve	0.0868097	0.999997	0.991719	0.155601	37	6	7.9436e-05	5.94119e-06	0.0753249	0.00142909	3.66715e-05	0.625135	0.00237796	-1.25908	0.0561935	-0.717621	0.000865343	-1.69459	0.205278	0.0309793	0.783307	0.825048	0.759964	1.01508e-07	1.30671	1.18426e-06	0.699512	0.329743	0.973009	Idh1	Genotype effect with no sex effect(real)
284	IMPC_BWT_008_001-14	Body weight curve	0.106167	0.999999	0.70712	0.987066	30	6	3.13949e-05	8.66403e-09	0.69232	0.000802812	9.69288e-08	0.924816	0.00362987	-1.21884	0.000269208	-1.22741	0.0233745	-1.03794	0.0136313	0.139468	0.798962	0.740214	0.866937	8.60777e-07	1.2926	6.84709e-06	0.0425844	1.48207	0.64689	Idh1	Genotype effect with no sex effect(real)
296	IMPC_BWT_008_001-15	Body weight curve	0.0939508	1	0.817382	0.225669	33	6	1.02277e-05	5.28803e-07	0.0440632	0.000457691	4.30253e-06	0.492957	0.000951794	-1.35921	0.0322437	-0.815374	0.000213824	-1.86343	0.164903	0.0127582	0.774248	0.843127	0.723387	9.05243e-08	1.30723	1.13155e-06	0.755577	0.259171	0.973009	Idh1	Different size
306	IMPC_BWT_008_001-16	Body weight curve	0.426785	1	0.999883	0.284659	31	6	0.000997525	8.04865e-06	0.493518	0.00661322	4.64745e-05	0.855879	0.0213847	-0.985757	0.0473171	-0.813417	0.019477	-1.20053	0.197555	0.139468	0.849624	0.854613	0.840523	1.00383e-06	1.31545	7.63781e-06	0.34678	0.92834	0.926439	Idh1	Genotype effect with no sex effect(real)
315	IMPC_BWT_008_001-4	Body weight curve	0.171849	1	0.490483	0.804563	34	6	0.103723	0.000717364	0.496907	0.221028	0.00377671	0.855879	0.153779	-0.621467	0.0823108	-0.838478	0.557976	-0.352537	0.2631	0.709227	0.912144	0.871129	0.954843	0.0039027	0.882633	0.0184587	0.173715	1.36857	0.772941	Idh1	Not significant
325	IMPC_BWT_008_001-5	Body weight curve	0.605765	0.999999	0.323969	0.233393	34	6	1.48114e-05	2.34002e-10	0.972586	0.000530248	9.03605e-09	0.994817	0.00486697	-1.17895	0.00030461	-1.14633	0.0128064	-1.13034	0.0136313	0.127352	0.836497	0.815456	0.86267	4.41938e-09	1.38107	1.28899e-07	0.11344	1.39706	0.752066	Idh1	Genotype effect with no sex effect(real)
335	IMPC_BWT_008_001-6	Body weight curve	0.13996	1	0.385977	0.975614	35	6	0.000141055	2.86915e-11	0.876736	0.00229536	2.56789e-09	0.9595	0.0202253	-0.98842	0.00518628	-1.00364	0.0212887	-0.931649	0.0580215	0.139468	0.845543	0.813606	0.875911	3.2593e-09	1.45441	1.14869e-07	0.0469808	1.52639	0.64689	Idh1	Genotype effect with no sex effect(real)
345	IMPC_BWT_008_001-7	Body weight curve	0.153485	1	0.384111	0.981036	30	6	0.000558142	1.40047e-09	0.590552	0.00488907	2.67616e-08	0.884758	0.020513	-0.993325	0.00249715	-1.02921	0.0720005	-0.772496	0.0372491	0.234329	0.836616	0.800515	0.888496	1.68696e-07	1.38704	1.6401e-06	0.0411287	1.64376	0.64689	Idh1	Genotype effect with no sex effect(real)
354	IMPC_BWT_008_001-8	Body weight curve	0.192576	1	0.160351	0.159235	29	6	1.46773e-08	2.38012e-07	0.00598236	1.31362e-06	2.13021e-06	0.356947	3.2901e-05	-1.63668	0.00564273	-0.950367	6.81629e-06	-2.19442	0.0594146	0.000610058	0.700436	0.840096	0.60875	2.88387e-07	1.24289	2.6562e-06	0.998214	-0.00116484	0.99943	Idh1	Different size
366	IMPC_BWT_008_001-9	Body weight curve	0.113779	1	0.952529	0.999255	36	6	0.00188576	3.4499e-09	0.594618	0.0105484	4.41095e-08	0.884758	0.0490349	-0.844342	0.0122708	-1.02402	0.097721	-0.739346	0.0990644	0.292954	0.87232	0.819476	0.906406	1.54137e-07	1.34421	1.58671e-06	0.070647	1.62888	0.752066	Idh1	Genotype effect with no sex effect(real)
247	IMPC_BWT_008_001-10	Body weight curve	0.0466022	1	0.883083	0.848448	34	6	0.000686581	3.92401e-11	0.220543	0.00474068	6.32201e-10	0.665748	0.0362986	-0.897953	0.000948444	-1.14043	0.152457	-0.573054	0.00980705	0.505166	0.89179	0.864513	0.924117	3.89925e-08	1.40126	4.1992e-07	0.00134021	1.96863	0.0233897	Iqgap1	Genotype effect with no sex effect(real)
257	IMPC_BWT_008_001-11	Body weight curve	0.0761844	1	0.995537	0.40392	36	6	0.000317892	1.35203e-11	0.213834	0.00271143	3.2674e-10	0.665748	0.0331782	-0.910222	0.000975095	-1.19794	0.110035	-0.622505	0.00980705	0.41987	0.89141	0.859739	0.916963	1.35734e-08	1.40527	2.11141e-07	0.00124705	1.9807	0.0233897	Iqgap1	Genotype effect with no sex effect(real)
266	IMPC_BWT_008_001-12	Body weight curve	0.129172	0.999999	0.486728	0.479945	22	6	0.000423178	6.76223e-10	0.683609	0.00340893	5.76778e-09	0.830017	0.0459254	-0.883102	0.00720311	-0.899184	0.0520176	-0.731687	0.0454109	0.305363	0.894244	0.883449	0.920245	9.38917e-07	1.48867	6.25945e-06	0.00549356	1.65617	0.0466471	Iqgap1	Genotype effect with no sex effect(real)
277	IMPC_BWT_008_001-13	Body weight curve	0.136589	0.999997	0.995872	0.579376	37	6	0.000118981	1.37551e-10	0.318	0.00144054	1.32966e-09	0.692068	0.0104046	-1.07876	0.000830832	-1.26592	0.0560246	-0.783307	0.00980705	0.305363	0.873071	0.846497	0.907375	7.78975e-08	1.33565	6.81604e-07	0.000878785	1.81827	0.0233897	Iqgap1	Genotype effect with no sex effect(real)
285	IMPC_BWT_008_001-14	Body weight curve	0.142532	0.999994	0.93161	0.756532	30	6	0.00101337	1.95098e-09	0.489076	0.00633045	1.41446e-08	0.73784	0.0260969	-0.955596	0.00500993	-1.03116	0.0938634	-0.696869	0.03302	0.402807	0.873434	0.858128	0.908274	8.39891e-07	1.37374	5.87924e-06	0.00519703	1.70803	0.0466471	Iqgap1	Genotype effect with no sex effect(real)
297	IMPC_BWT_008_001-15	Body weight curve	0.074451	1	0.992859	0.718304	33	6	3.5655e-05	2.42452e-10	0.614665	0.000738568	2.19722e-09	0.830017	0.00913406	-1.10174	0.00193101	-1.19819	0.0165696	-0.963677	0.0133332	0.200216	0.858624	0.852834	0.868361	1.22428e-07	1.37302	9.52214e-07	0.00256892	1.60753	0.0266067	Iqgap1	Genotype effect with no sex effect(real)
316	IMPC_BWT_008_001-4	Body weight curve	0.138068	1	0.770917	0.977347	34	6	0.000135982	0.000651517	0.868623	0.00144054	0.00269914	0.906117	0.000912315	-1.36335	0.00114979	-1.39198	0.0331901	-1.28631	0.00980705	0.240628	0.80886	0.816032	0.80898	0.00341736	0.823026	0.0144979	0.218722	0.928698	0.496261	Iqgap1	Genotype effect with no sex effect(real)
326	IMPC_BWT_008_001-5	Body weight curve	0.720556	0.999999	0.708862	0.772841	34	6	1.67981e-05	9.92136e-13	0.383515	0.000727293	4.79532e-11	0.692068	0.0127065	-1.05503	0.00022306	-1.19288	0.0267883	-0.831648	0.00931841	0.222624	0.854257	0.820396	0.891104	1.70881e-09	1.45419	4.78466e-08	0.00190492	1.81542	0.0233897	Iqgap1	Genotype effect with no sex effect(real)
336	IMPC_BWT_008_001-6	Body weight curve	0.387492	1	0.540095	0.387803	35	6	5.42884e-05	3.5217e-13	0.202601	0.000983977	4.77563e-11	0.665748	0.0243586	-0.960269	0.00014233	-1.20403	0.0692505	-0.674687	0.00931841	0.334711	0.869788	0.819977	0.914569	8.11318e-10	1.46371	3.78615e-08	0.000979614	1.99306	0.0233897	Iqgap1	Genotype effect with no sex effect(real)
346	IMPC_BWT_008_001-7	Body weight curve	0.172772	1	0.516743	0.442275	30	6	0.0010478	4.36782e-11	0.278644	0.00633045	6.33334e-10	0.692068	0.0407349	-0.884897	0.00109378	-1.02658	0.156776	-0.550636	0.00980705	0.505166	0.88823	0.858649	0.936393	6.38318e-08	1.44431	5.95764e-07	0.00167443	1.92026	0.0233897	Iqgap1	Genotype effect with no sex effect(real)
355	IMPC_BWT_008_001-8	Body weight curve	0.429045	1	0.921826	0.508294	29	6	9.09258e-05	3.68614e-11	0.362699	0.00144054	6.32201e-10	0.692068	0.0188834	-1.00763	0.00046357	-1.12554	0.0545674	-0.741489	0.00931841	0.305363	0.861833	0.846745	0.893673	5.97122e-08	1.43294	5.95764e-07	0.00175471	1.81699	0.0233897	Iqgap1	Genotype effect with no sex effect(real)
367	IMPC_BWT_008_001-9	Body weight curve	0.257797	1	0.999704	0.629717	36	6	0.00114189	1.20505e-10	0.0610763	0.00662295	1.24809e-09	0.590404	0.0558368	-0.821633	0.000433803	-1.3147	0.323135	-0.402664	0.00931841	0.660331	0.888942	0.819476	0.936402	1.03796e-07	1.33377	8.54791e-07	0.000326402	2.2458	0.0233897	Iqgap1	Genotype effect with no sex effect(real)
248	IMPC_BWT_008_001-10	Body weight curve	0.00136195	0.997586	0.726248	0.601729	33	6	0.00174004	4.79044e-06	0.146344	0.032707	2.48076e-05	0.606283	0.0165345	-0.965687	0.137849	-0.515574	0.00871787	-1.29945	0.590414	0.180584	0.878595	0.94924	0.837356	4.51005e-07	1.27986	3.71416e-06	0.562826	0.49599	0.847537	Mfap4	Genotype effect with no sex effect(real)
258	IMPC_BWT_008_001-11	Body weight curve	0.00315756	0.997976	0.998328	0.499085	35	6	0.0716844	1.28178e-10	0.152921	0.339417	3.09765e-09	0.615931	0.264228	-0.462716	0.016916	-0.783339	0.793867	-0.103861	0.122641	0.943142	0.969859	0.925455	1.01111	6.69499e-08	1.33811	1.17162e-06	0.00488628	2.01759	0.0647868	Mfap4	Not significant
267	IMPC_BWT_008_001-12	Body weight curve	0.00767822	1	0.689512	0.0689767	22	6	0.0252547	0.00115702	0.0695223	0.1732	0.00466023	0.493825	0.0631149	-0.826697	0.581732	-0.180854	0.0354909	-1.35432	0.816667	0.47272	0.878286	0.963205	0.828906	1.11983e-05	1.30046	6.02988e-05	0.915009	0.127002	0.947688	Mfap4	Genotype effect with no sex effect(real)
278	IMPC_BWT_008_001-13	Body weight curve	0.00494322	0.999983	0.967384	0.746974	37	6	0.92407	1.32573e-09	0.913064	0.998392	1.4787e-08	0.991323	0.844432	-0.0858902	0.890378	-0.0570174	0.993343	0.00349714	0.9493	0.999803	0.983408	0.960888	1.01593	2.31994e-07	1.45854	2.4984e-06	0.00271916	1.51906	0.061391	Mfap4	Not significant
286	IMPC_BWT_008_001-14	Body weight curve	0.0147906	0.999989	0.987458	0.859841	30	6	0.00759115	1.53639e-07	0.170166	0.097544	1.11388e-06	0.632668	0.108157	0.701838	0.00533288	1.18361	0.361188	0.418905	0.110467	0.822934	1.10045	1.21293	1.03803	1.13012e-06	1.49131	7.91087e-06	0.228558	0.726606	0.534531	Mfap4	Genotype effect with no sex effect(real)
298	IMPC_BWT_008_001-15	Body weight curve	0.00150516	1	0.961469	0.0918888	33	6	0.000209523	3.601e-05	0.105713	0.00506347	0.00016317	0.585312	0.00459865	-1.18793	0.0406614	-0.709668	0.00376264	-1.62736	0.256344	0.0909305	0.860899	0.916623	0.821138	2.86753e-07	1.28104	2.86753e-06	0.723979	0.363342	0.857264	Mfap4	Genotype effect with no sex effect(real)
307	IMPC_BWT_008_001-16	Body weight curve	0.0144855	1	0.988211	0.831821	31	6	0.00941804	1.89037e-06	0.980475	0.097544	1.05425e-05	0.991423	0.0792457	-0.763658	0.0609638	-0.791845	0.116806	-0.777719	0.35359	0.769861	0.92615	0.929829	0.917666	2.1705e-06	1.30968	1.38123e-05	0.196175	1.32381	0.521894	Mfap4	Genotype effect with no sex effect(real)
317	IMPC_BWT_008_001-4	Body weight curve	0.0931026	1	0.654544	0.864876	34	6	0.762664	0.00132258	0.430682	0.992495	0.0051831	0.818765	0.844999	0.0863225	0.391948	0.410936	0.777062	-0.178744	0.79705	0.940267	0.997393	1.03774	0.970237	0.00339605	1.0123	0.0135842	0.248117	0.422616	0.545106	Mfap4	Not significant
327	IMPC_BWT_008_001-5	Body weight curve	0.0490091	0.999999	0.51752	0.378877	34	6	0.0263528	2.9965e-11	0.177809	0.1732	2.17247e-09	0.644558	0.17205	-0.594911	0.0120852	-0.872028	0.547818	-0.232814	0.11066	0.822934	0.94739	0.930213	0.971591	1.29876e-08	1.44466	5.78296e-07	0.0112861	2.08387	0.10228	Mfap4	Genotype effect with no sex effect(real)
337	IMPC_BWT_008_001-6	Body weight curve	0.00342678	1	0.355586	0.344136	35	6	0.878975	5.91444e-11	0.137933	0.998392	2.85864e-09	0.592508	0.970471	0.0163122	0.373873	-0.333614	0.281701	0.407626	0.79705	0.822934	1.00729	0.958308	1.0522	5.29268e-08	1.44857	1.05854e-06	0.00102247	2.18981	0.0518397	Mfap4	Not significant
347	IMPC_BWT_008_001-7	Body weight curve	0.0315858	1	0.516743	0.44412	30	6	0.190708	1.07147e-09	0.851849	0.558817	1.4124e-08	0.961359	0.608642	0.227976	0.44726	0.284485	0.338341	0.378254	0.806646	0.822934	1.01515	1.01622	1.04262	1.86559e-07	1.55091	2.4984e-06	0.00999173	1.64468	0.10228	Mfap4	Not significant
356	IMPC_BWT_008_001-8	Body weight curve	0.0189296	1	0.420357	0.727962	29	6	0.012229	1.13775e-06	0.0357235	0.118214	6.59895e-06	0.470901	0.104121	-0.712784	0.946732	-0.0275609	0.0105753	-1.24316	0.970977	0.191677	0.876266	0.97379	0.821299	8.25975e-07	1.49689	6.42425e-06	0.707407	0.281298	0.857264	Mfap4	One sex_Male only
368	IMPC_BWT_008_001-9	Body weight curve	0.00402364	0.999999	0.945178	0.697332	36	6	0.859242	1.72897e-09	0.582944	0.998392	1.79072e-08	0.846437	0.985131	-0.00818921	0.635976	-0.199541	0.800044	0.103795	0.816667	0.943142	1.00747	0.961924	1.03422	3.61599e-07	1.4286	3.16399e-06	0.00682187	1.73194	0.0760901	Mfap4	Not significant
249	IMPC_BWT_008_001-10	Body weight curve	0.00170545	1	0.764734	0.837527	34	6	0.933554	1.00766e-09	0.824757	0.946085	1.47084e-08	0.900556	0.96038	-0.0219345	0.925263	-0.037539	0.842824	0.0812158	0.943118	0.980508	0.994033	0.962619	1.03087	2.13875e-07	1.48828	2.26097e-06	0.00975111	1.60703	0.14606	Mmachc	Not significant
259	IMPC_BWT_008_001-11	Body weight curve	0.000947265	1	0.927456	0.499085	36	6	0.610661	3.00436e-10	0.430363	0.792649	6.48084e-09	0.704959	0.758379	0.135124	0.856056	-0.0730694	0.383301	0.343317	0.940983	0.771713	1.01636	0.967875	1.05547	1.12127e-07	1.45195	1.84387e-06	0.00311532	1.86833	0.142298	Mmachc	Not significant
268	IMPC_BWT_008_001-12	Body weight curve	0.040209	1	0.506673	0.997345	22	6	0.750191	5.79817e-07	0.227293	0.824015	3.08006e-06	0.62991	0.960825	0.0225952	0.294118	0.430703	0.595017	-0.238639	0.62956	0.863919	0.983175	1.04756	0.951955	4.19465e-06	1.6156	2.48324e-05	0.222126	0.946258	0.684512	Mmachc	Not significant
279	IMPC_BWT_008_001-13	Body weight curve	0.00557703	0.999996	0.990157	0.726661	37	6	0.74409	1.90333e-09	0.148444	0.824015	2.09834e-08	0.628726	0.731308	-0.15037	0.228947	-0.494677	0.468948	0.303089	0.598873	0.79471	0.980842	0.945159	1.02419	1.67313e-07	1.34619	2.06352e-06	0.0334633	2.14395	0.208227	Mmachc	Not significant
287	IMPC_BWT_008_001-14	Body weight curve	0.0116926	0.99998	0.903042	0.0726165	30	6	0.35489	6.76191e-06	0.239251	0.62312	3.19078e-05	0.62991	0.387899	-0.382175	0.812483	0.0838666	0.239313	-0.663832	0.908777	0.681815	0.949266	0.991899	0.93931	1.1232e-06	1.38289	8.46668e-06	0.598951	0.635188	0.822629	Mmachc	Not significant
299	IMPC_BWT_008_001-15	Body weight curve	0.00203766	0.999995	0.915647	0.826788	33	6	0.753073	1.94549e-09	0.745422	0.824015	2.09834e-08	0.852718	0.807968	-0.107408	0.67046	-0.172478	0.99572	0.00219714	0.848404	0.999415	0.983133	0.959612	1.00788	2.93304e-07	1.46964	2.71306e-06	0.023219	1.64432	0.166956	Mmachc	Not significant
318	IMPC_BWT_008_001-4	Body weight curve	0.0376349	1	0.531934	0.842513	34	6	0.539797	0.000396527	0.687491	0.754716	0.00161826	0.840688	0.65999	0.194043	0.871	0.076111	0.548009	0.368617	0.940983	0.827493	1.02804	0.995227	1.06453	0.00382797	0.962906	0.0149089	0.0403208	1.25541	0.225498	Mmachc	Not significant
328	IMPC_BWT_008_001-5	Body weight curve	0.070584	0.999999	0.450813	0.362284	34	6	0.382729	1.15989e-10	0.257468	0.638534	4.37859e-09	0.62991	0.691123	0.17506	0.170156	0.506152	0.87803	-0.0595247	0.593987	0.994542	1.01087	1.04288	0.99552	4.56836e-09	1.64063	2.25373e-07	0.0544741	1.07495	0.274186	Mmachc	Not significant
338	IMPC_BWT_008_001-6	Body weight curve	0.00982618	1	0.355586	0.344136	35	6	0.574705	5.91444e-11	0.906409	0.767969	2.97693e-09	0.937451	0.786012	0.119581	0.767465	0.112054	0.65505	0.17137	0.876942	0.883147	1.01212	1.00145	1.02647	1.14958e-08	1.54917	4.25343e-07	0.0217185	1.60849	0.163975	Mmachc	Not significant
348	IMPC_BWT_008_001-7	Body weight curve	0.0479486	1	0.516743	0.44412	30	6	0.517981	1.07147e-09	0.658541	0.753987	1.47084e-08	0.840688	0.890027	0.061677	0.894126	0.0503374	0.487497	0.275996	0.943118	0.79471	1.00444	1.00095	1.03521	1.48027e-07	1.52235	2.06352e-06	0.032322	1.74801	0.208227	Mmachc	Not significant
357	IMPC_BWT_008_001-8	Body weight curve	0.0340819	0.998066	0.951615	0.518368	28	6	0.588253	3.50553e-09	0.168082	0.772402	3.11948e-08	0.628726	0.5763	-0.235621	0.132946	-0.470618	0.635452	0.190073	0.593987	0.870777	0.974045	0.948199	1.02479	1.74745e-06	1.33488	1.23154e-05	0.00676728	1.99557	0.14598	Mmachc	Not significant
369	IMPC_BWT_008_001-9	Body weight curve	0.00557901	0.999998	0.872635	0.97918	36	6	0.616447	7.28627e-08	0.438269	0.792649	5.79067e-07	0.704959	0.797048	-0.112874	0.855557	0.079569	0.410966	-0.384975	0.940983	0.79471	0.972279	0.993935	0.944631	2.57173e-07	1.43384	2.53744e-06	0.299034	0.969294	0.713798	Mmachc	Not significant
2410	IMPC_BWT_008_001-10	Body weight curve	0.0238794	1	0.764734	0.845412	34	6	0.194998	1.009e-09	0.950807	0.389996	1.53506e-08	0.981693	0.496132	0.299596	0.408073	0.327687	0.374542	0.3601	0.704362	0.642607	1.04609	1.01139	1.08617	4.05528e-08	1.50612	5.64053e-07	0.0580599	1.53854	0.237974	Mvk	Not significant
2510	IMPC_BWT_008_001-11	Body weight curve	0.0146282	1	0.970371	0.472321	36	6	0.514697	3.96112e-10	0.830738	0.668042	7.82322e-09	0.937547	0.692135	0.17392	0.773517	0.117021	0.561302	0.230819	0.902178	0.74724	1.01445	0.98437	1.03872	1.49534e-08	1.48943	2.85985e-07	0.0796254	1.60323	0.246683	Mvk	Not significant
269	IMPC_BWT_008_001-12	Body weight curve	0.452003	1	0.99828	0.960994	22	6	0.0360127	1.0421e-07	0.118911	0.137555	7.84053e-07	0.381738	0.274106	0.497231	0.00952356	0.967948	0.684245	0.177468	0.178024	0.814913	1.0939	1.17931	1.04836	5.18113e-07	1.66049	4.40396e-06	0.23897	0.870012	0.477939	Mvk	Genotype effect with no sex effect(real)
2710	IMPC_BWT_008_001-13	Body weight curve	0.0296565	0.995334	0.877825	0.711146	37	6	0.757638	1.87611e-09	0.227817	0.848984	2.11732e-08	0.472336	0.739918	-0.144676	0.30085	-0.422061	0.563245	0.24284	0.617329	0.74724	0.984049	0.946589	1.02891	7.47893e-08	1.3583	8.80212e-07	0.0602467	2.0232	0.237974	Mvk	Not significant
288	IMPC_BWT_008_001-14	Body weight curve	0.0209465	0.999999	0.889193	0.0624793	30	6	1.0444e-08	8.14057e-08	5.86105e-06	1.65016e-06	6.43105e-07	0.000926045	0.000457737	-1.42975	0.635372	-0.145753	1.88023e-06	-2.5446	0.839927	0.000297076	0.825659	0.98763	0.71623	8.98617e-07	1.26861	6.87442e-06	0.0412592	-1.13024	0.237974	Mvk	One sex_Male only
2910	IMPC_BWT_008_001-15	Body weight curve	0.0197243	0.995592	0.731565	0.869524	33	6	0.515299	1.67725e-09	0.174679	0.668042	2.03851e-08	0.431238	0.731686	0.150713	0.641753	-0.184779	0.186847	0.528175	0.839927	0.518223	1.03183	0.979026	1.08043	9.01343e-08	1.38498	9.85039e-07	0.04384	2.09793	0.237974	Mvk	Not significant
308	IMPC_BWT_008_001-16	Body weight curve	0.109089	1	0.99987	0.989551	31	6	0.0429357	3.24956e-07	0.374638	0.144337	2.13929e-06	0.610236	0.15963	0.616842	0.0530481	0.845828	0.449795	0.341153	0.239474	0.683342	1.09936	1.14423	1.05621	1.37486e-06	1.44777	1.00168e-05	0.179588	0.943098	0.41123	Mvk	Genotype effect with no sex effect(real)
319	IMPC_BWT_008_001-4	Body weight curve	0.0361241	1	0.488075	0.795899	34	6	0.337964	0.000993425	0.904948	0.539378	0.00413056	0.972687	0.456004	0.328008	0.392095	0.400363	0.621214	0.312174	0.697061	0.785215	1.03917	1.0323	1.05327	0.00455534	0.960867	0.020499	0.089292	0.872678	0.269868	Mvk	Not significant
329	IMPC_BWT_008_001-5	Body weight curve	0.0494589	0.999999	0.386106	0.342809	34	6	0.870632	9.99437e-11	0.974633	0.929458	5.2637e-09	0.987128	0.843655	-0.0869645	0.930186	-0.0331156	0.898719	-0.0492173	0.974737	0.928089	0.991917	0.992341	1.0022	3.21677e-08	1.55713	4.92167e-07	0.00623719	1.54103	0.197095	Mvk	Not significant
339	IMPC_BWT_008_001-6	Body weight curve	0.0103991	1	0.349216	0.344136	35	6	0.561707	5.9016e-11	0.96128	0.677479	4.66227e-09	0.981693	0.777604	0.12439	0.674444	0.158939	0.726225	0.134453	0.842837	0.843703	1.01397	1.00581	1.02633	1.1392e-08	1.56142	2.48997e-07	0.0188615	1.53693	0.237974	Mvk	Not significant
349	IMPC_BWT_008_001-7	Body weight curve	0.0816061	1	0.501129	0.445369	30	6	0.19027	1.07201e-09	0.354624	0.389491	1.53506e-08	0.600603	0.608128	0.228304	0.798414	0.0964901	0.150787	0.558602	0.914126	0.467145	1.01659	0.998518	1.05922	1.02822e-07	1.48862	1.04878e-06	0.0269037	1.95073	0.237974	Mvk	Not significant
358	IMPC_BWT_008_001-8	Body weight curve	0.158538	1	0.993102	0.874084	29	6	0.00257545	8.84588e-09	0.252504	0.0313016	8.73531e-08	0.492539	0.0850674	0.753397	0.00336376	1.12475	0.214641	0.541771	0.177158	0.542405	1.14071	1.25857	1.07619	1.31152e-07	1.54403	1.20492e-06	0.15782	0.961049	0.383625	Mvk	Genotype effect with no sex effect(real)
3610	IMPC_BWT_008_001-9	Body weight curve	0.0332382	0.999998	0.978575	0.687526	36	6	0.911829	2.16701e-09	0.357673	0.941628	2.28258e-08	0.600603	0.870694	0.0714605	0.600822	-0.221636	0.482083	0.287261	0.818644	0.698594	1.01903	0.969927	1.04856	1.3388e-07	1.39134	1.20492e-06	0.052457	1.90023	0.237974	Mvk	Not significant
2411	IMPC_BWT_008_001-10	Body weight curve	0.0042763	1	0.764734	0.836699	34	6	0.00278083	9.81699e-11	0.0299511	0.0361508	2.00547e-09	0.305929	0.0937721	-0.726237	0.000285708	-1.20459	0.679155	-0.169076	0.0136187	0.894427	0.946897	0.884986	1.00756	1.03172e-07	1.33969	1.68558e-06	0.00107054	2.37521	0.0306174	Nek2	One sex_Female only
2511	IMPC_BWT_008_001-11	Body weight curve	0.00418933	1	0.937393	0.499085	36	6	0.00339772	1.93061e-11	0.00857932	0.0404896	8.91968e-10	0.136316	0.208785	-0.547176	0.000661488	-1.18376	0.822079	0.0894057	0.0236482	0.932994	0.972912	0.895785	1.03514	3.82854e-08	1.3299	8.64998e-07	0.00193927	2.60307	0.0396164	Nek2	One sex_Female only
2711	IMPC_BWT_008_001-13	Body weight curve	0.011415	0.999995	0.97481	0.733651	37	6	0.0313693	4.15927e-10	0.11506	0.236095	5.40705e-09	0.587629	0.138322	-0.640678	0.0083087	-0.994791	0.670757	-0.177735	0.12377	0.894427	0.939786	0.885104	0.99823	1.60609e-07	1.34223	2.18859e-06	0.00455926	2.15928	0.0651974	Nek2	Genotype effect with no sex effect(real)
289	IMPC_BWT_008_001-14	Body weight curve	0.00697049	0.844983	0.41591	0.778032	29	6	0.568569	1.85618e-08	0.0961631	0.813053	1.76955e-07	0.572972	0.522936	-0.267171	0.0717099	-0.578237	0.537671	0.259515	0.376163	0.894427	0.965297	0.918403	1.03458	5.4931e-06	1.2506	3.58359e-05	0.00958192	2.08835	0.0856384	Nek2	Not significant
2911	IMPC_BWT_008_001-15	Body weight curve	0.00397075	0.999999	0.966787	0.841126	33	6	0.134575	2.60012e-09	0.150185	0.534561	2.65584e-08	0.596568	0.335629	-0.42323	0.0445718	-0.777252	0.946498	-0.027624	0.289717	0.97531	0.960944	0.911076	1.00676	3.00131e-07	1.37231	3.16292e-06	0.0160446	2.12194	0.114719	Nek2	Not significant
309	IMPC_BWT_008_001-16	Body weight curve	0.0363523	1	0.99999	0.0998184	31	6	0.000271483	0.000230561	0.292544	0.0122431	0.00117043	0.724858	0.00517097	-1.17671	0.0131895	-0.883303	0.0133562	-1.50816	0.12377	0.190993	0.856659	0.889406	0.82485	2.32662e-06	1.17966	1.87498e-05	0.635728	0.554794	0.826672	Nek2	Genotype effect with no sex effect(real)
3110	IMPC_BWT_008_001-4	Body weight curve	0.020388	1	0.646111	0.930701	34	6	0.524409	0.00119251	0.964961	0.784367	0.00487224	0.978649	0.546901	-0.265412	0.64931	-0.221643	0.684334	-0.254435	0.931835	0.894427	0.952999	0.952603	0.960808	0.00530589	0.930672	0.0234486	0.209821	0.897881	0.587831	Nek2	Not significant
3210	IMPC_BWT_008_001-5	Body weight curve	0.0244461	0.999999	0.386106	0.342809	34	6	0.0722543	7.3303e-11	0.0347989	0.4087	1.74705e-09	0.331749	0.537828	-0.271053	0.0353461	-0.744813	0.458036	0.284885	0.280805	0.894427	0.989538	0.936292	1.04369	4.4197e-08	1.39703	8.64998e-07	0.00429644	2.42673	0.0651974	Nek2	Interaction_One sex_Female only2
3310	IMPC_BWT_008_001-6	Body weight curve	0.00715637	1	0.355586	0.344136	35	6	0.229434	3.80128e-11	0.0739151	0.6082	1.08717e-09	0.524174	0.460727	-0.323911	0.0384026	-0.739703	0.729765	0.13265	0.28903	0.894427	0.977243	0.920813	1.02793	1.99124e-08	1.42694	6.81999e-07	0.00603298	2.2993	0.071893	Nek2	Not significant
3410	IMPC_BWT_008_001-7	Body weight curve	0.0101042	0.997694	0.825847	0.442275	29	6	0.392327	1.71105e-09	0.167557	0.738195	1.88215e-08	0.647584	0.428461	-0.332299	0.068664	-0.543249	0.781896	0.110647	0.376163	0.92232	0.963178	0.920432	1.03081	1.58172e-06	1.34557	1.36993e-05	0.000574732	1.99947	0.0205467	Nek2	Not significant
3611	IMPC_BWT_008_001-9	Body weight curve	0.0108266	1	0.954106	0.708293	36	6	0.0223747	3.08604e-10	0.0437655	0.177754	4.41304e-09	0.368145	0.188084	-0.572234	0.00313289	-1.12159	0.813088	-0.0969443	0.0746673	0.931473	0.966273	0.896302	1.01335	1.75726e-07	1.33323	2.18859e-06	0.00159942	2.35788	0.0381195	Nek2	One sex_Female only
2412	IMPC_BWT_008_001-10	Body weight curve	0.0315434	1	0.764734	0.846082	34	6	0.0148863	1.01009e-09	0.27052	0.101615	1.28878e-08	0.685026	0.179815	0.585259	0.369267	0.354982	0.0181058	0.899853	0.784596	0.123592	1.06724	1.04846	1.09485	3.82225e-08	1.43337	7.26227e-07	0.0158768	1.97824	0.110098	Npc2	Genotype effect with no sex effect(real)
2512	IMPC_BWT_008_001-11	Body weight curve	0.00311178	1	0.935401	0.499085	36	6	0.0451636	3.02573e-10	0.229239	0.194053	4.92394e-09	0.680203	0.232498	0.520206	0.587371	0.217998	0.0274677	0.822414	0.886205	0.165862	1.04466	1.00102	1.07987	2.70492e-08	1.42532	5.87354e-07	0.0125161	2.02974	0.110098	Npc2	Genotype effect with no sex effect(real)
2712	IMPC_BWT_008_001-13	Body weight curve	0.00976935	0.999998	0.969833	0.763887	37	6	0.00966793	1.17113e-10	0.00397127	0.0722793	3.06445e-09	0.0779363	0.625296	0.213768	0.228306	-0.489381	0.00838335	1.01926	0.64264	0.08998	1.01677	0.943729	1.09145	1.86575e-07	1.26227	2.02567e-06	0.0054905	2.77092	0.0957788	Npc2	One sex_Male only
2810	IMPC_BWT_008_001-14	Body weight curve	0.100169	0.999999	0.818017	0.804078	30	6	0.00210621	2.69206e-10	0.00321709	0.022045	4.92394e-09	0.0731774	0.356437	0.408485	0.569667	-0.229331	0.000847581	1.21552	0.884658	0.0226218	1.06454	1.00898	1.13678	2.75477e-07	1.2691	2.7915e-06	0.0106966	2.71395	0.110098	Npc2	One sex_Male only
2912	IMPC_BWT_008_001-15	Body weight curve	0.00361463	0.994896	0.901243	0.983529	32	6	0.0732853	2.15039e-09	0.41983	0.255684	2.41151e-08	0.791626	0.286191	0.443257	0.537601	0.24864	0.0618234	0.637875	0.884658	0.313106	1.04247	0.997053	1.07924	4.92153e-07	1.36104	4.67546e-06	0.000318745	1.75027	0.050043	Npc2	Not significant
3010	IMPC_BWT_008_001-16	Body weight curve	0.0300315	1	0.999766	0.12525	31	6	0.0276227	0.000178573	0.101935	0.149544	0.000966758	0.551855	0.0893569	-0.740295	0.56663	-0.225943	0.035624	-1.2954	0.884658	0.207147	0.923866	0.97979	0.872733	1.31985e-06	1.26344	1.05588e-05	0.884571	0.193979	0.957776	Npc2	Genotype effect with no sex effect(real)
3111	IMPC_BWT_008_001-4	Body weight curve	0.0831183	0.997424	0.753712	0.877751	33	6	0.0295325	0.00102858	0.0786932	0.154553	0.00504646	0.480358	0.0863532	0.704051	0.686441	0.164695	0.0231651	1.31069	0.910024	0.151539	1.13677	1.03485	1.23887	0.00874072	0.740098	0.0379597	0.0417736	1.88609	0.234231	Npc2	Genotype effect with no sex effect(real)
3211	IMPC_BWT_008_001-5	Body weight curve	0.165857	1	0.386106	0.353394	34	6	0.00155084	2.44413e-12	0.00326269	0.0187294	1.91864e-10	0.0731774	0.288121	0.465529	0.660522	-0.165543	0.000363923	1.17672	0.910024	0.0157088	1.08327	0.991961	1.16955	9.87525e-10	1.36195	6.79588e-08	0.014496	2.70421	0.110098	Npc2	One sex_Male only
3311	IMPC_BWT_008_001-6	Body weight curve	0.0452457	1	0.355586	0.344136	35	6	0.000519994	5.91444e-11	0.250188	0.00952833	1.85713e-09	0.680203	0.0648916	0.795767	0.121701	0.567622	0.00161051	1.06647	0.522765	0.0316064	1.10183	1.05871	1.14259	9.92833e-10	1.48964	6.79588e-08	0.00426054	1.98849	0.0955579	Npc2	Genotype effect with no sex effect(real)
3411	IMPC_BWT_008_001-7	Body weight curve	0.137191	1	0.516743	0.43579	30	6	0.00396756	1.06714e-09	0.0648736	0.0366416	1.28878e-08	0.480358	0.176809	0.594353	0.459113	0.277269	0.00157129	1.10353	0.863221	0.0316064	1.06179	1.02715	1.11879	5.19747e-08	1.44066	7.70896e-07	0.00238177	2.26692	0.0904633	Npc2	Genotype effect with no sex effect(real)
3612	IMPC_BWT_008_001-9	Body weight curve	0.0148247	1	0.949846	0.708976	36	6	0.00620691	3.13627e-10	0.0353379	0.0512887	4.92394e-09	0.277402	0.115063	0.681915	0.785303	0.115132	0.000864527	1.17586	0.944241	0.0226218	1.08046	1.00034	1.13464	1.6246e-07	1.31104	1.89954e-06	0.00304475	2.37177	0.0904633	Npc2	One sex_Male only
2413	IMPC_BWT_008_001-10	Body weight curve	0.0196744	1	0.764734	0.835356	34	6	0.0129218	1.02179e-10	0.00318971	0.0962672	1.44299e-09	0.0564217	0.941887	-0.0321826	0.0487785	-0.744285	0.0525837	0.75523	0.531583	0.239913	1.00248	0.92188	1.07874	5.77582e-08	1.28027	8.43269e-07	0.0152393	2.77978	0.091331	Pebp1	One sex_Female only
2513	IMPC_BWT_008_001-11	Body weight curve	0.00315786	1	0.931282	0.499085	36	6	0.0270026	7.63385e-11	0.0109293	0.15355	1.42181e-09	0.101779	0.602147	0.228806	0.294116	-0.416942	0.017924	0.874555	0.842755	0.146415	1.02734	0.949852	1.08986	2.69211e-08	1.3272	4.36719e-07	0.0142598	2.6187	0.091331	Pebp1	One sex_Male only
2610	IMPC_BWT_008_001-12	Body weight curve	0.00956764	0.997302	0.641607	0.999793	21	6	0.283417	2.67943e-07	0.923434	0.548431	1.53552e-06	0.965757	0.58689	0.233555	0.555378	0.243156	0.430308	0.290505	0.940453	0.713921	0.985743	1.00657	0.9791	7.77187e-06	1.39755	4.05248e-05	0.0826507	1.4449	0.24147	Pebp1	Not significant
2713	IMPC_BWT_008_001-13	Body weight curve	0.0211638	0.999998	0.969853	0.760384	37	6	0.0177826	2.15836e-10	0.00792249	0.120437	2.47382e-09	0.0860558	0.619306	0.217446	0.291345	-0.43072	0.0129471	0.969195	0.842755	0.126019	1.01548	0.946589	1.08673	9.20918e-08	1.27753	1.18736e-06	0.0143531	2.67744	0.091331	Pebp1	One sex_Male only
2811	IMPC_BWT_008_001-14	Body weight curve	0.0295057	0.999998	0.804229	0.804078	30	6	0.00670775	6.50765e-10	0.00411113	0.0744861	6.46427e-09	0.0603683	0.559535	0.259439	0.340035	-0.380558	0.00495002	1.06781	0.881317	0.0903379	1.02381	0.957745	1.10348	5.87625e-07	1.2628	5.04666e-06	0.0110536	2.71117	0.091331	Pebp1	One sex_Male only
2913	IMPC_BWT_008_001-15	Body weight curve	0.0089437	0.996852	0.993551	0.00971029	32	6	0.0380949	3.59607e-06	0.810023	0.172004	1.57593e-05	0.894026	0.13553	-0.616319	0.0436061	-0.685724	0.31023	-0.546914	0.531583	0.608928	0.927206	0.912463	0.939146	2.58653e-07	1.17545	2.69738e-06	0.328859	1.31426	0.605459	Pebp1	Genotype effect with no sex effect(real)
3011	IMPC_BWT_008_001-16	Body weight curve	0.0611012	1	0.999508	0.880435	31	6	0.00249052	3.25058e-10	0.00054463	0.061848	3.45955e-09	0.02705	0.865502	0.0753476	0.0384853	-0.837671	0.012327	0.950561	0.521301	0.126019	1.0204	0.895604	1.11627	1.27328e-06	1.17198	9.52917e-06	0.00808421	2.96021	0.091331	Pebp1	Different direction
3112	IMPC_BWT_008_001-4	Body weight curve	0.0485332	0.998229	0.692671	0.689273	33	6	0.923871	0.0114877	0.612008	0.946544	0.0335621	0.799905	0.993721	0.00329768	0.583189	0.227608	0.819745	-0.150859	0.953518	0.942384	0.995537	1.03332	0.973712	0.0120121	0.77169	0.0427748	0.719064	0.393223	0.892838	Pebp1	Not significant
3212	IMPC_BWT_008_001-5	Body weight curve	0.0780084	1	0.386106	0.349992	34	6	0.0543927	4.63383e-11	0.0161527	0.197671	1.16742e-09	0.135057	0.994746	0.00290651	0.136101	-0.544923	0.0904053	0.631888	0.689406	0.286938	1.00075	0.941042	1.06031	1.24614e-08	1.37957	2.61196e-07	0.0150714	2.55638	0.091331	Pebp1	Interaction_cannot classify2
3312	IMPC_BWT_008_001-6	Body weight curve	0.0152315	1	0.355586	0.344136	35	6	0.946544	5.91444e-11	0.0487647	0.946544	1.25893e-09	0.27588	0.990471	-0.00526315	0.202498	-0.472519	0.180878	0.502398	0.794006	0.419179	1.02227	0.977237	1.06412	3.87051e-09	1.4142	2.61196e-07	0.0287002	2.38912	0.129586	Pebp1	Interaction_cannot classify2
3412	IMPC_BWT_008_001-7	Body weight curve	0.082106	1	0.516743	0.445369	30	6	0.228358	1.07392e-09	0.0964698	0.500374	9.41263e-09	0.368564	0.649844	0.202235	0.763413	-0.113695	0.0632147	0.708404	0.958438	0.26236	1.02119	0.981338	1.08118	1.3261e-07	1.42679	1.48931e-06	0.0171867	2.24889	0.0916542	Pebp1	Not significant
3613	IMPC_BWT_008_001-9	Body weight curve	0.00540439	1	0.960382	0.695809	36	6	0.00654768	1.30834e-10	0.00340802	0.0744861	1.62452e-09	0.0564217	0.39138	0.375019	0.31767	-0.417633	0.00237045	1.09823	0.860598	0.0692172	1.04071	0.942718	1.10986	2.91518e-07	1.25003	2.83744e-06	0.00383539	2.76589	0.0816391	Pebp1	One sex_Male only
2414	IMPC_BWT_008_001-10	Body weight curve	0.0104354	1	0.963029	0.046134	34	6	9.96277e-05	1.84855e-06	0.0327099	0.00310145	1.22677e-05	0.436149	0.00358856	-1.21633	0.0818703	-0.574529	0.00146367	-1.78154	0.398435	0.106848	0.845872	0.92438	0.793088	1.12826e-07	1.30191	1.41045e-06	0.92516	0.094902	0.957967	Phyh	One sex_Male only
2514	IMPC_BWT_008_001-11	Body weight curve	0.00177886	1	0.935401	0.499085	36	6	0.499473	3.02573e-10	0.957169	0.769191	7.3626e-09	0.989457	0.683424	0.179097	0.681985	0.164893	0.625959	0.193301	0.92677	0.938888	1.02354	0.997563	1.04451	6.29985e-08	1.50761	8.81979e-07	0.00450456	1.53602	0.222224	Phyh	Not significant
2611	IMPC_BWT_008_001-12	Body weight curve	0.0349627	0.999999	0.664771	0.067493	22	6	0.000856798	0.000123835	0.0282014	0.011372	0.000623445	0.436149	0.013531	-1.07063	0.257511	-0.362791	0.00646934	-1.65858	0.696234	0.116749	0.842161	0.933603	0.786957	6.93158e-06	1.31887	4.04342e-05	0.981564	0.0230847	0.981564	Phyh	One sex_Male only
2714	IMPC_BWT_008_001-13	Body weight curve	0.0392951	0.999998	0.993015	0.0891612	37	6	0.000512722	2.5101e-06	0.547139	0.00935717	1.52698e-05	0.869744	0.00547996	-1.16176	0.00509139	-0.934662	0.0249495	-1.29407	0.123891	0.227664	0.81969	0.852999	0.803822	1.80041e-07	1.16916	1.57536e-06	0.549106	0.809754	0.867374	Phyh	Genotype effect with no sex effect(real)
2812	IMPC_BWT_008_001-14	Body weight curve	0.0317816	0.999999	0.69566	0.402539	30	6	0.0240363	2.29469e-06	0.675687	0.152578	1.45663e-05	0.869744	0.0754676	-0.774112	0.13803	-0.562368	0.117688	-0.808311	0.516727	0.53695	0.899153	0.926437	0.900291	1.62619e-06	1.33158	1.08413e-05	0.318468	1.08564	0.742775	Phyh	Genotype effect with no sex effect(real)
2914	IMPC_BWT_008_001-15	Body weight curve	0.0238199	1	0.997119	0.0765002	33	6	9.05127e-07	3.63372e-07	0.103066	0.000132149	2.94735e-06	0.578754	0.000226551	-1.49077	0.000632152	-1.06312	0.000550921	-1.8808	0.0461471	0.0804344	0.801282	0.855959	0.762012	1.58976e-07	1.24175	1.57536e-06	0.599128	0.424073	0.892578	Phyh	Genotype effect with no sex effect(real)
3012	IMPC_BWT_008_001-16	Body weight curve	0.00316926	0.998052	0.982644	0.225905	30	6	0.628187	4.63684e-06	0.600085	0.797524	2.70792e-05	0.869744	0.800416	-0.106393	0.98192	0.00980618	0.532218	-0.306914	0.990894	0.911597	0.973051	0.956424	0.975464	7.91083e-06	1.26482	4.25968e-05	0.363009	0.948098	0.743652	Phyh	Not significant
3113	IMPC_BWT_008_001-4	Body weight curve	0.0134159	0.997871	0.980417	0.965906	33	6	0.111863	0.00237094	0.961514	0.388856	0.00961549	0.989457	0.145394	-0.60121	0.171991	-0.580646	0.371644	-0.546986	0.627765	0.813404	0.912825	0.91003	0.925593	0.0103185	0.822657	0.0390567	0.109228	0.856317	0.549907	Phyh	Not significant
3213	IMPC_BWT_008_001-5	Body weight curve	0.254404	0.999999	0.231612	0.203877	34	6	0.000135017	6.78401e-10	0.626217	0.00310145	1.23808e-08	0.869744	0.0119341	-1.06366	0.000274432	-1.14243	0.0526833	-0.905145	0.0400671	0.366274	0.879711	0.872739	0.89484	1.19201e-08	1.35577	4.17204e-07	0.102492	1.59305	0.549907	Phyh	Genotype effect with no sex effect(real)
3313	IMPC_BWT_008_001-6	Body weight curve	0.00786109	1	0.355586	0.344136	35	6	0.263152	5.91444e-11	0.133306	0.574973	2.87836e-09	0.629684	0.48973	-0.303444	0.0720125	-0.652113	0.821824	0.0865581	0.369079	0.96169	0.990051	0.953394	1.02502	1.95032e-08	1.44667	5.42017e-07	0.00787719	2.18534	0.222224	Phyh	Not significant
3413	IMPC_BWT_008_001-7	Body weight curve	0.0187543	1	0.516743	0.442275	30	6	0.841746	1.06678e-09	0.604718	0.935407	1.5575e-08	0.869744	0.728353	-0.154787	0.619445	-0.187048	0.844456	0.0784558	0.92677	0.96169	0.979611	0.957564	1.02436	4.19254e-07	1.50736	3.45268e-06	0.00913249	1.77287	0.222224	Phyh	Not significant
3614	IMPC_BWT_008_001-9	Body weight curve	0.0164994	1	0.938528	0.163432	36	6	0.0415444	6.21347e-07	0.751494	0.216625	4.53583e-06	0.91637	0.171017	-0.594689	0.0647792	-0.725655	0.319096	-0.534545	0.369079	0.781055	0.931561	0.913908	0.936364	1.76224e-07	1.27479	1.57536e-06	0.273642	1.4659	0.742775	Phyh	Genotype effect with no sex effect(real)
2415	IMPC_BWT_008_001-10	Body weight curve	0.00422596	0.999997	0.714387	0.146662	34	6	0.000110696	2.42052e-07	0.00783824	0.00231259	2.19271e-06	0.0710053	0.0104161	-1.08172	0.42666	-0.29705	0.000497324	-1.78398	0.650731	0.00845206	0.850963	0.949196	0.78247	8.60402e-08	1.40118	1.26479e-06	0.91413	-0.085743	0.957661	Pipox	One sex_Male only
2515	IMPC_BWT_008_001-11	Body weight curve	0.0021708	1	0.974833	0.46123	36	6	0.583332	5.07796e-10	0.751265	0.667825	1.56401e-08	0.832337	0.737297	-0.147377	0.569022	-0.232337	0.876312	-0.0624164	0.774502	0.917632	0.986416	0.968791	1.00064	4.50233e-08	1.47572	9.4549e-07	0.0427277	1.64564	0.415903	Pipox	Not significant
2715	IMPC_BWT_008_001-13	Body weight curve	0.0150406	0.999997	0.986834	0.713529	37	6	0.991999	2.37301e-09	0.0727689	1	6.09071e-08	0.228702	0.88788	-0.0617872	0.223301	-0.503688	0.241915	0.486779	0.509398	0.388073	0.986615	0.953739	1.02773	1.32362e-07	1.31554	1.59007e-06	0.0380613	2.30601	0.415903	Pipox	Not significant
2813	IMPC_BWT_008_001-14	Body weight curve	0.0532774	0.999999	0.818017	0.806902	30	6	0.681543	1.09804e-08	0.10717	0.755091	1.89687e-07	0.286226	0.978132	0.0122188	0.410792	-0.329608	0.196524	0.534372	0.649317	0.364634	0.994987	0.971976	1.03918	4.42109e-07	1.35245	4.06187e-06	0.0459113	2.21643	0.415903	Pipox	Not significant
2915	IMPC_BWT_008_001-15	Body weight curve	0.0101574	0.999999	0.985636	0.854267	33	6	0.190784	4.9439e-09	0.94034	0.293607	1.08766e-07	0.952712	0.38855	-0.379409	0.360793	-0.377417	0.415152	-0.337006	0.594858	0.581213	0.950465	0.938811	0.965465	1.40618e-07	1.46505	1.59007e-06	0.0783447	1.50546	0.482604	Pipox	Not significant
3013	IMPC_BWT_008_001-16	Body weight curve	0.04616	1	0.999997	0.111876	31	6	9.17299e-05	4.14497e-06	0.00462014	0.00231259	2.90148e-05	0.0514485	0.0114218	-1.07516	0.51611	-0.258049	0.000548835	-1.93526	0.729502	0.00845206	0.867842	0.957585	0.789424	9.16522e-07	1.3327	7.92522e-06	0.702669	-0.344503	0.917706	Pipox	One sex_Male only
3114	IMPC_BWT_008_001-4	Body weight curve	0.0416986	1	0.754215	0.82688	34	6	0.00590827	0.00656198	0.0345054	0.0259964	0.0306226	0.156289	0.026002	-0.951528	0.723303	-0.157607	0.0101381	-1.69341	0.877583	0.0663551	0.877373	0.982573	0.79306	0.00341675	0.884619	0.0179379	0.480571	-0.651187	0.82231	Pipox	One sex_Male only
3214	IMPC_BWT_008_001-5	Body weight curve	0.020633	0.999999	0.903228	0.0129037	34	6	1.38338e-07	1.64176e-08	0.00120592	1.0652e-05	2.29846e-07	0.0309129	0.000463201	-1.42603	0.0482325	-0.583572	2.61557e-05	-2.18815	0.376207	0.00201399	0.846082	0.937432	0.780441	6.56074e-09	1.36574	2.43453e-07	0.738203	-0.238838	0.918713	Pipox	Different size
3414	IMPC_BWT_008_001-7	Body weight curve	0.0480558	1	0.386168	0.744929	30	6	0.000437688	3.44269e-08	0.00140513	0.00612763	3.78696e-07	0.0309129	0.071409	-0.785002	0.630117	0.195457	0.000531364	-1.55379	0.803451	0.00845206	0.872171	1.01275	0.785316	1.02708e-07	1.58751	1.37256e-06	0.746265	-0.161745	0.918713	Pipox	One sex_Male only
3615	IMPC_BWT_008_001-9	Body weight curve	0.00238545	1	0.730205	0.926317	36	6	0.00043547	1.68757e-07	0.0037017	0.00612763	1.62428e-06	0.0514485	0.0542313	-0.826559	0.983914	-0.00942498	0.000148665	-1.72372	0.989711	0.0057236	0.872359	0.990734	0.766928	3.80167e-07	1.4404	3.90474e-06	0.524056	-0.273888	0.83024	Pipox	One sex_Male only
2416	IMPC_BWT_008_001-10	Body weight curve	0.00865298	1	0.972262	0.0462635	34	6	0.00430949	2.54113e-07	0.0271177	0.0219645	2.96319e-06	0.237243	0.0658013	-0.79414	0.751611	-0.113991	0.00755446	-1.38838	0.906523	0.0670485	0.888093	0.957416	0.843149	7.64497e-08	1.46041	8.93874e-07	0.828627	0.186023	0.998034	Plk1	One sex_Male only
2516	IMPC_BWT_008_001-11	Body weight curve	0.00387811	1	0.999758	0.0192376	36	6	0.0193619	6.86096e-07	0.0619298	0.0527444	5.16206e-06	0.268984	0.0956315	-0.71999	0.634019	-0.175172	0.016254	-1.26481	0.858912	0.090219	0.916167	0.96818	0.874202	2.95973e-08	1.4444	4.99865e-07	0.720672	0.354763	0.998034	Plk1	Genotype effect with no sex effect(real)
2612	IMPC_BWT_008_001-12	Body weight curve	0.0280695	0.999985	0.312417	0.315825	22	6	0.0159917	2.49197e-06	0.0221336	0.0451195	1.64055e-05	0.237243	0.193889	-0.586518	0.744598	0.128554	0.0178764	-1.15534	0.904973	0.090219	0.916317	0.992347	0.874654	4.70677e-06	1.60871	2.98095e-05	0.61072	0.324817	0.998034	Plk1	One sex_Male only
2716	IMPC_BWT_008_001-13	Body weight curve	0.0732939	0.999959	0.964085	0.0650513	37	6	0.00174587	2.59549e-07	0.0305312	0.0129947	2.96319e-06	0.237243	0.0282851	-0.931927	0.515834	-0.249579	0.00309899	-1.50092	0.790605	0.0468129	0.880769	0.955169	0.831858	8.87977e-08	1.39811	9.64089e-07	0.859543	0.146771	0.998034	Plk1	One sex_Male only
2814	IMPC_BWT_008_001-14	Body weight curve	0.0073267	0.999994	0.484098	0.968171	30	6	0.000676158	6.07316e-07	0.00450859	0.0106833	4.7978e-06	0.202088	0.0387868	-0.891783	0.961602	0.0223047	0.000345862	-1.6093	0.97393	0.0109292	0.856728	0.990476	0.770872	1.87567e-06	1.47428	1.35763e-05	0.672783	-0.157329	0.998034	Plk1	One sex_Male only
2916	IMPC_BWT_008_001-15	Body weight curve	0.00766555	0.999999	0.999761	0.0463748	33	6	0.00460128	3.21871e-06	0.0415595	0.0222286	1.95598e-05	0.237243	0.0378205	-0.892206	0.430976	-0.290067	0.00540025	-1.45096	0.721593	0.0609457	0.89684	0.951291	0.858315	6.8651e-08	1.43179	8.93874e-07	0.772798	0.270895	0.998034	Plk1	One sex_Male only
3014	IMPC_BWT_008_001-16	Body weight curve	0.0187258	1	0.999974	0.050176	31	6	0.00166889	1.7949e-05	0.277581	0.0129947	9.45312e-05	0.471589	0.024148	-0.967237	0.0780745	-0.672645	0.0188014	-1.30433	0.300872	0.090219	0.90172	0.926659	0.87602	1.84592e-06	1.31747	1.35763e-05	0.471154	0.685785	0.998034	Plk1	Genotype effect with no sex effect(real)
3115	IMPC_BWT_008_001-4	Body weight curve	0.0347236	1	0.508726	0.920883	34	6	0.0127708	0.000171334	0.123759	0.0380761	0.00077345	0.329013	0.0349731	-0.904307	0.000834668	-1.39209	0.539495	-0.367111	0.118348	0.63612	0.899992	0.823314	0.973509	0.00259796	0.840082	0.0106727	0.0848167	1.86506	0.875875	Plk1	Genotype effect with no sex effect(real)
3215	IMPC_BWT_008_001-5	Body weight curve	0.389481	0.999999	0.806856	0.0132891	34	6	3.076e-05	3.89963e-09	0.153179	0.000972018	2.05381e-07	0.342261	0.00419573	-1.1967	0.00743337	-0.804656	0.0022877	-1.50499	0.118348	0.045182	0.854767	0.923943	0.807355	2.16811e-09	1.42398	1.17961e-07	0.415193	0.72365	0.998034	Plk1	Genotype effect with no sex effect(real)
3314	IMPC_BWT_008_001-6	Body weight curve	0.104889	1	0.767342	0.0112265	35	6	0.00100985	9.78534e-09	0.00959071	0.0113969	3.09217e-07	0.237243	0.0617889	-0.804748	0.812042	-0.0799721	0.00283241	-1.48553	0.95718	0.0468129	0.884046	0.986156	0.807606	2.32818e-09	1.53966	1.17961e-07	0.874775	0.134099	0.998034	Plk1	One sex_Male only
3415	IMPC_BWT_008_001-7	Body weight curve	0.114471	1	0.794999	0.0277857	30	6	0.00482047	2.39534e-07	0.0135935	0.022401	2.96319e-06	0.237243	0.0914292	-0.737155	0.848394	0.0621323	0.0094851	-1.33119	0.96734	0.0702994	0.894644	0.986024	0.847324	7.31556e-08	1.53941	8.93874e-07	0.862502	0.146089	0.998034	Plk1	One sex_Male only
359	IMPC_BWT_008_001-8	Body weight curve	0.0444736	1	0.546999	0.992447	29	6	0.0373988	7.0573e-08	0.294818	0.0832256	1.23895e-06	0.490656	0.140062	-0.649438	0.470598	-0.291828	0.0477756	-0.848883	0.761587	0.142425	0.893798	0.946946	0.873581	4.31884e-07	1.52893	3.86155e-06	0.143908	0.971875	0.903933	Plk1	Genotype effect with no sex effect(real)
3616	IMPC_BWT_008_001-9	Body weight curve	0.0208859	1	0.999871	0.0335403	36	6	0.0175751	5.88755e-07	0.0238666	0.048717	4.7978e-06	0.237243	0.231757	-0.520981	0.735006	0.132242	0.0216839	-1.25449	0.904973	0.100766	0.943146	1.00994	0.879018	1.13835e-07	1.44512	1.15353e-06	0.951351	0.0583921	0.998034	Plk1	One sex_Male only
2417	IMPC_BWT_008_001-10	Body weight curve	0.00608682	1	0.871756	0.848448	34	6	0.116993	1.30242e-09	0.757861	0.334331	1.95363e-08	0.874455	0.293296	-0.460507	0.400858	-0.335249	0.218315	-0.496516	0.782591	0.488766	0.947445	0.958502	0.949783	1.03e-07	1.51724	1.214e-06	0.0100498	1.35598	0.150796	Pmm2	Not significant
2517	IMPC_BWT_008_001-11	Body weight curve	0.0052225	0.997976	0.999847	0.44247	35	6	0.100336	6.1057e-10	0.834789	0.313551	1.24308e-08	0.897652	0.299207	-0.430727	0.193449	-0.461796	0.363948	-0.359363	0.636646	0.627496	0.959141	0.959636	0.963914	4.70658e-08	1.4103	8.47185e-07	0.023211	1.51273	0.150796	Pmm2	Not significant
2717	IMPC_BWT_008_001-13	Body weight curve	0.0172817	0.994504	0.899508	0.650816	37	6	0.0986544	2.91229e-09	0.755067	0.313551	3.12031e-08	0.874455	0.23355	-0.514822	0.373239	-0.3709	0.192348	-0.54065	0.782591	0.488766	0.949088	0.958743	0.954572	8.69712e-08	1.45649	1.18674e-06	0.0511223	1.28673	0.215812	Pmm2	Not significant
2815	IMPC_BWT_008_001-14	Body weight curve	0.0323688	0.999988	0.997146	0.889187	30	6	0.00451627	5.83607e-08	0.00154119	0.0451627	4.8634e-07	0.0577945	0.67687	0.185331	0.00356177	1.21363	0.175595	-0.623884	0.146017	0.488766	1.05156	1.19723	0.961094	3.89251e-07	1.64316	3.50326e-06	0.385114	-0.194352	0.632077	Pmm2	One sex_Female only
2917	IMPC_BWT_008_001-15	Body weight curve	0.00735408	0.999999	0.925135	0.0268224	33	6	9.22222e-05	1.18342e-06	0.00247958	0.00371749	7.39637e-06	0.0722315	0.0146312	-1.03687	0.711287	-0.123617	0.000913571	-1.90895	0.867423	0.0456786	0.876676	0.977639	0.800597	1.09597e-07	1.35887	1.214e-06	0.672291	-0.426464	0.853229	Pmm2	One sex_Male only
3015	IMPC_BWT_008_001-16	Body weight curve	0.037858	1	0.99999	0.753648	31	6	0.326986	4.35714e-08	0.639456	0.571061	3.84454e-07	0.829605	0.564332	-0.255848	0.742145	-0.14744	0.31982	-0.412051	0.877006	0.606651	0.975126	0.975627	0.968948	1.47264e-06	1.48165	1.0603e-05	0.0546724	1.21704	0.215812	Pmm2	Not significant
3116	IMPC_BWT_008_001-4	Body weight curve	0.0560933	1	0.513828	0.809943	34	6	0.96544	0.00258753	0.271554	0.975517	0.00970323	0.724401	0.923932	-0.0421675	0.400283	0.403846	0.504056	-0.42956	0.782591	0.706621	0.993135	1.04451	0.956382	0.00368219	0.996548	0.0151496	0.755246	0.163143	0.899103	Pmm2	Not significant
3216	IMPC_BWT_008_001-5	Body weight curve	0.245382	0.999999	0.386106	0.342809	34	6	0.00295786	5.87474e-12	0.275302	0.0341291	5.07532e-10	0.724401	0.079253	-0.758426	0.0041787	-0.960755	0.215156	-0.469585	0.146017	0.488766	0.923682	0.903993	0.949683	4.77126e-09	1.47072	2.2902e-07	0.00648141	1.96189	0.150796	Pmm2	Genotype effect with no sex effect(real)
3315	IMPC_BWT_008_001-6	Body weight curve	0.0286826	1	0.355586	0.344136	35	6	0.0101054	6.76709e-12	0.324294	0.0757903	5.07532e-10	0.726403	0.135633	-0.648174	0.014173	-0.855873	0.293534	-0.398037	0.146017	0.60502	0.95042	0.927001	0.974591	3.13052e-09	1.48533	2.25398e-07	0.0130765	1.94317	0.150796	Pmm2	Genotype effect with no sex effect(real)
3416	IMPC_BWT_008_001-7	Body weight curve	0.0588431	0.997694	0.825847	0.442275	29	6	0.0703216	1.71105e-09	0.789113	0.270468	2.33324e-08	0.896719	0.183069	-0.553837	0.103032	-0.49267	0.350577	-0.368865	0.513916	0.616005	0.938245	0.937454	0.971527	2.75325e-07	1.42761	2.83191e-06	0.0146929	1.55142	0.150796	Pmm2	Not significant
3510	IMPC_BWT_008_001-8	Body weight curve	0.0182008	1	0.52819	0.996577	29	6	0.0278372	5.59157e-07	0.0523041	0.139186	3.64668e-06	0.356619	0.104564	-0.711901	0.816218	-0.0997338	0.00748501	-1.16422	0.89078	0.127032	0.871887	0.962326	0.8223	6.23465e-07	1.5452	4.7252e-06	0.363257	0.480715	0.632077	Pmm2	Genotype effect with no sex effect(real)
3617	IMPC_BWT_008_001-9	Body weight curve	0.00581498	0.973054	0.942663	0.687526	35	6	0.12335	2.41911e-09	0.371983	0.334331	3.02388e-08	0.738086	0.362534	-0.377721	0.0874956	-0.622717	0.677472	-0.170745	0.504782	0.839841	0.965993	0.930788	0.989873	3.30444e-07	1.33074	3.17226e-06	0.00666481	1.78272	0.150796	Pmm2	Not significant
2418	IMPC_BWT_008_001-10	Body weight curve	0.00265334	1	0.764734	0.844024	34	6	0.729003	1.00721e-09	0.678864	0.860917	1.65351e-08	0.89531	0.756009	-0.137108	0.962351	0.0188915	0.619759	-0.202654	0.962351	0.941587	0.978798	0.965171	1.00124	1.55062e-07	1.5377	2.03303e-06	0.00179274	1.31616	0.0464634	Ptpn12	Not significant
2518	IMPC_BWT_008_001-11	Body weight curve	0.00303615	0.998025	0.998376	0.499085	35	6	0.0434768	9.84458e-11	0.095075	0.20823	3.70286e-09	0.548301	0.214239	-0.513776	0.00553655	-0.885898	0.793867	-0.103861	0.145269	0.956816	0.965813	0.917913	1.00988	7.22955e-08	1.32275	1.2187e-06	0.00187353	2.10479	0.0464634	Ptpn12	Genotype effect with no sex effect(real)
2613	IMPC_BWT_008_001-12	Body weight curve	0.0280054	0.999999	0.747188	0.840766	22	6	0.828859	1.02403e-07	0.165952	0.940917	7.90418e-07	0.566021	0.978933	-0.0121391	0.283085	0.424599	0.473552	-0.296059	0.521008	0.941587	0.993291	1.05588	0.96368	3.48075e-06	1.68099	2.16173e-05	0.0719062	0.960335	0.297212	Ptpn12	Not significant
2718	IMPC_BWT_008_001-13	Body weight curve	0.00517557	0.99997	0.959143	0.74063	37	6	0.975791	1.32021e-09	0.892176	0.979897	1.81896e-08	0.959781	0.876726	-0.0678904	0.942986	0.0295774	0.913455	-0.0455407	0.950653	0.965189	0.979559	0.962318	1.00767	1.90954e-07	1.47775	2.04842e-06	0.00163802	1.40263	0.0464634	Ptpn12	Not significant
2918	IMPC_BWT_008_001-15	Body weight curve	0.000999452	0.999992	0.873987	0.999987	33	6	0.0465828	2.04266e-08	0.787845	0.213936	1.94838e-07	0.943793	0.187134	-0.576095	0.246532	-0.481046	0.142445	-0.627137	0.5095	0.810278	0.921493	0.936037	0.915234	3.29383e-07	1.45222	3.23893e-06	0.0689899	1.30613	0.294991	Ptpn12	Genotype effect with no sex effect(real)
3117	IMPC_BWT_008_001-4	Body weight curve	0.00728749	0.998229	0.896725	0.713334	33	6	0.554712	0.00222396	0.652307	0.760553	0.0083567	0.871507	0.549334	-0.250275	0.341904	-0.37549	0.933616	-0.0531354	0.557843	0.965189	0.957078	0.923547	0.99726	0.013245	0.791164	0.0558184	0.143009	1.11352	0.4427	Ptpn12	Not significant
3217	IMPC_BWT_008_001-5	Body weight curve	0.178532	0.999999	0.386106	0.342809	34	6	0.0248525	2.1185e-11	0.0816661	0.192607	1.31347e-09	0.548301	0.171016	-0.596313	0.0041787	-0.960755	0.701293	-0.14806	0.145269	0.956816	0.947758	0.908805	0.989771	1.78113e-08	1.42478	6.65236e-07	0.00334897	2.23748	0.0509947	Ptpn12	Genotype effect with no sex effect(real)
3316	IMPC_BWT_008_001-6	Body weight curve	0.00522302	1	0.617121	0.00968494	35	6	0.0509884	1.89036e-07	0.393462	0.218019	1.23371e-06	0.667792	0.165103	-0.604107	0.307595	-0.335149	0.123081	-0.832663	0.529746	0.810278	0.934013	0.945931	0.929876	2.40393e-08	1.41407	6.65236e-07	0.437218	0.916561	0.771831	Ptpn12	Not significant
3417	IMPC_BWT_008_001-7	Body weight curve	0.0122816	1	0.516743	0.442275	30	6	0.90078	1.06678e-09	0.754204	0.971276	1.65351e-08	0.943793	0.872357	-0.0716533	0.894426	-0.0501941	0.781896	0.110647	0.947673	0.956816	0.990402	0.970753	1.03356	5.23025e-07	1.52819	4.74746e-06	0.00177627	1.68903	0.0464634	Ptpn12	Not significant
3618	IMPC_BWT_008_001-9	Body weight curve	0.00676139	1	0.957022	0.678208	36	6	0.438922	1.74068e-09	0.772547	0.681287	2.15844e-08	0.943793	0.694216	-0.172619	0.487024	-0.29238	0.744294	-0.133509	0.707896	0.956816	0.995905	0.960323	1.01465	1.90053e-07	1.45172	2.04842e-06	0.0200607	1.6106	0.144653	Ptpn12	Not significant
2419	IMPC_BWT_008_001-10	Body weight curve	0.00163345	1	0.885833	0.161115	33	6	2.13482e-08	2.05088e-07	0.00129434	7.52524e-07	1.92783e-06	0.0249234	5.39154e-05	-1.55657	0.016884	-0.730819	8.23027e-06	-2.27334	0.132258	0.00111932	0.807403	0.92289	0.728818	4.50945e-07	1.1988	3.40714e-06	0.423153	-0.343723	0.735876	Pttg1	Different size
2519	IMPC_BWT_008_001-11	Body weight curve	0.0020173	1	0.945885	0.956017	36	6	6.73876e-07	7.32133e-10	0.50372	1.35738e-05	1.72051e-08	0.72474	0.000864384	-1.36753	0.0016121	-1.21021	0.000542884	-1.52485	0.0252563	0.0064851	0.845646	0.911211	0.792746	2.26159e-08	1.34111	3.8447e-07	0.0988202	1.02646	0.559713	Pttg1	Genotype effect with no sex effect(real)
2614	IMPC_BWT_008_001-12	Body weight curve	0.00377355	1	0.279285	0.850581	22	6	0.000894908	3.29479e-06	0.00745208	0.00467341	1.60195e-05	0.105074	0.0474391	-0.877501	0.888007	-0.0672898	0.000380403	-1.54767	0.935445	0.00574832	0.845956	0.973941	0.762165	1.59231e-05	1.5405	7.73407e-05	0.87081	0.0601198	0.939569	Pttg1	One sex_Male only
2719	IMPC_BWT_008_001-13	Body weight curve	0.00500778	0.999993	0.978235	0.223151	37	6	1.30082e-05	2.70988e-07	0.0351415	0.000151596	2.24761e-06	0.225225	0.000984329	-1.35184	0.0544393	-0.733282	0.000191327	-1.8652	0.307038	0.00412154	0.832016	0.910842	0.778761	1.70601e-07	1.29727	1.5509e-06	0.805993	0.165348	0.91739	Pttg1	One sex_Male only
2816	IMPC_BWT_008_001-14	Body weight curve	0.0041906	0.999959	0.579263	0.912115	30	6	0.000935189	8.798e-07	0.0175317	0.00470934	5.38158e-06	0.191038	0.022957	-0.974131	0.642264	-0.210174	0.000622253	-1.54586	0.79438	0.00650973	0.843985	0.94636	0.783114	2.53027e-06	1.44169	1.71999e-05	0.772146	0.106005	0.901663	Pttg1	One sex_Male only
2919	IMPC_BWT_008_001-15	Body weight curve	0.00195113	0.999991	0.74475	0.327621	33	6	7.66944e-06	3.6671e-07	0.0287698	9.83083e-05	2.87256e-06	0.204593	0.00115114	-1.33807	0.0585763	-0.747552	0.000116312	-1.88857	0.317664	0.00412154	0.834585	0.92633	0.765675	1.82459e-07	1.32033	1.5509e-06	0.801419	0.179317	0.91739	Pttg1	One sex_Male only
3016	IMPC_BWT_008_001-16	Body weight curve	0.00441609	1	0.977826	0.204903	31	6	4.9829e-05	2.68665e-06	0.00366682	0.000390327	1.40303e-05	0.0574468	0.00891996	-1.1081	0.509739	-0.282406	0.000162058	-1.97702	0.776933	0.00412154	0.856407	0.946924	0.777425	3.05348e-06	1.33979	1.80554e-05	0.567137	-0.354824	0.809308	Pttg1	One sex_Male only
3118	IMPC_BWT_008_001-4	Body weight curve	0.183942	1	0.783007	0.547162	34	6	1.63575e-05	0.000413048	0.000492945	0.000153761	0.00153263	0.0130499	0.00303436	-1.23568	0.934993	-0.0315389	0.000242443	-2.3899	0.969367	0.00412154	0.830743	1.00056	0.690058	0.00282267	0.848726	0.0106634	0.0326967	-1.50963	0.388125	Pttg1	One sex_Male only
3218	IMPC_BWT_008_001-5	Body weight curve	0.0214051	0.999999	0.346052	0.893845	34	6	0.000280899	1.12401e-07	0.0871066	0.00165028	1.13203e-06	0.341168	0.0134423	-1.04722	0.148423	-0.575432	0.00068022	-1.43156	0.51043	0.00660785	0.876521	0.957762	0.819474	8.57693e-09	1.48648	2.1945e-07	0.360021	0.630352	0.730477	Pttg1	Genotype effect with no sex effect(real)
3317	IMPC_BWT_008_001-6	Body weight curve	0.0122612	1	0.478574	0.993469	35	6	0.00394052	1.49548e-08	0.0763253	0.0154337	2.55711e-07	0.319236	0.059188	-0.812557	0.406988	-0.336471	0.00219729	-1.24432	0.737831	0.0135832	0.892101	0.980696	0.826499	2.45771e-09	1.55138	1.67124e-07	0.386854	0.643528	0.735876	Pttg1	Genotype effect with no sex effect(real)
3418	IMPC_BWT_008_001-7	Body weight curve	0.0241869	1	0.589536	0.994505	30	6	0.00199612	4.3171e-08	0.035118	0.00879542	5.0726e-07	0.225225	0.0386382	-0.893738	0.558116	-0.241975	0.00149713	-1.33941	0.789861	0.00969567	0.856386	0.955308	0.802034	1.72597e-07	1.54572	1.5509e-06	0.345855	0.448285	0.730477	Pttg1	One sex_Male only
3511	IMPC_BWT_008_001-8	Body weight curve	0.0541588	1	0.868315	0.999998	29	6	0.000276555	2.31787e-07	0.306776	0.00165028	2.04263e-06	0.584532	0.0141562	-1.04891	0.0738182	-0.725592	0.00272977	-1.2204	0.358909	0.0148499	0.836351	0.924122	0.787997	1.49677e-07	1.46766	1.5509e-06	0.130189	0.972859	0.560088	Pttg1	Genotype effect with no sex effect(real)
3619	IMPC_BWT_008_001-9	Body weight curve	0.00758678	1	0.961512	0.9791	36	6	3.53954e-05	1.79126e-08	0.348947	0.000293573	2.55711e-07	0.622804	0.00481812	-1.17904	0.0234926	-0.970116	0.00120341	-1.46269	0.159314	0.00861391	0.857143	0.912307	0.803376	1.45461e-07	1.34497	1.5509e-06	0.222887	0.852401	0.63682	Pttg1	Genotype effect with no sex effect(real)
2420	IMPC_BWT_008_001-10	Body weight curve	0.00516867	1	0.885906	0.828658	34	6	0.756997	1.6883e-09	0.753519	0.926134	2.25107e-08	0.937495	0.771973	-0.127874	0.996282	0.0018957	0.68329	-0.168378	0.996282	0.904762	0.982906	0.995105	0.984749	1.17901e-07	1.51751	1.67206e-06	0.047689	1.34724	0.379128	Rock1	Not significant
2520	IMPC_BWT_008_001-11	Body weight curve	0.00412307	1	0.974833	0.46123	36	6	0.47587	5.07796e-10	0.721669	0.911268	1.01559e-08	0.937495	0.663078	-0.191321	0.814463	-0.0960893	0.471921	-0.286553	0.985589	0.831471	0.979323	0.975664	0.982275	2.58024e-08	1.5272	4.49456e-07	0.0609181	1.33674	0.379337	Rock1	Not significant
2615	IMPC_BWT_008_001-12	Body weight curve	0.0749995	1	0.499683	0.484054	22	6	0.878722	4.28799e-08	0.157116	0.965708	3.88147e-07	0.937495	0.945757	-0.031297	0.29289	0.403448	0.43817	-0.311003	0.985589	0.831471	0.975811	1.04465	0.940958	1.30016e-06	1.70542	1.01413e-05	0.0950881	0.990972	0.445286	Rock1	Not significant
2720	IMPC_BWT_008_001-13	Body weight curve	0.00942386	0.999786	0.957057	0.711472	37	6	0.924647	1.99989e-09	0.467757	0.968213	2.4614e-08	0.937495	0.940567	-0.032582	0.668933	-0.178043	0.59039	0.226267	0.985589	0.890024	0.981483	0.962318	1.01121	1.73336e-07	1.39844	2.25337e-06	0.0401032	1.80275	0.354245	Rock1	Not significant
2817	IMPC_BWT_008_001-14	Body weight curve	0.0214667	0.999992	0.919672	0.888919	30	6	0.581027	3.75186e-08	0.341803	0.926134	3.75186e-07	0.937495	0.569969	-0.25239	0.782518	0.116232	0.333943	-0.415404	0.985589	0.831471	0.941717	0.987139	0.929316	9.8757e-07	1.54206	8.10847e-06	0.0885497	1.01042	0.439981	Rock1	Not significant
3017	IMPC_BWT_008_001-16	Body weight curve	0.0136208	1	0.999913	0.999997	31	6	0.145453	3.55649e-07	0.747638	0.672847	2.47408e-06	0.937495	0.351044	-0.412292	0.455203	-0.340333	0.239968	-0.529487	0.985589	0.831471	0.933066	0.954012	0.910441	2.69822e-06	1.40231	1.8301e-05	0.159127	1.21316	0.538323	Rock1	Not significant
3219	IMPC_BWT_008_001-5	Body weight curve	0.259947	0.999999	0.51752	0.378877	34	6	0.0481979	4.18897e-11	0.32649	0.428425	2.04044e-09	0.937495	0.21848	-0.53732	0.0413265	-0.731064	0.506429	-0.257083	0.472303	0.831471	0.936513	0.910073	0.968173	1.13336e-08	1.47038	4.42009e-07	0.0204119	1.94436	0.267523	Rock1	Genotype effect with no sex effect(real)
3318	IMPC_BWT_008_001-6	Body weight curve	0.016977	0.998233	0.355586	0.617121	34	6	0.667913	5.10109e-11	0.085576	0.926134	2.04044e-09	0.85786	0.808716	-0.101254	0.176972	-0.499174	0.368028	0.296667	0.985589	0.831471	0.995631	0.953029	1.02985	8.69561e-09	1.36714	4.42009e-07	0.0195673	2.16298	0.267523	Rock1	Not significant
3419	IMPC_BWT_008_001-7	Body weight curve	0.0285423	1	0.516743	0.44412	30	6	0.906901	1.07147e-09	0.741216	0.965708	1.90484e-08	0.937495	0.868878	-0.0736335	0.880844	-0.0566921	0.77748	0.112989	0.985589	0.911881	0.987987	0.986891	1.0164	2.78086e-07	1.52673	2.83731e-06	0.0177459	1.69641	0.267523	Rock1	Not significant
3512	IMPC_BWT_008_001-8	Body weight curve	0.0285045	1	0.402765	0.893028	29	6	0.0163331	6.35176e-07	0.0234995	0.298902	4.06513e-06	0.773815	0.168207	-0.607793	0.761842	0.127326	0.0124835	-1.18391	0.985589	0.24967	0.891515	0.998405	0.829658	5.9538e-07	1.53704	5.46349e-06	0.750222	0.225811	0.903677	Rock1	One sex_Male only
3620	IMPC_BWT_008_001-9	Body weight curve	0.00783504	1	0.985267	0.677739	36	6	0.721813	2.23423e-09	0.831491	0.926134	2.5534e-08	0.941181	0.750343	0.139778	0.71097	0.157808	0.923578	0.0394621	0.985589	0.947259	1.00891	0.997136	1.00813	2.45877e-07	1.48112	2.73977e-06	0.00778008	1.36278	0.267523	Rock1	Not significant
70	IMPC_DXA_010_001	Bone Area	0.206646	0.998245	0.9262	0.863824	36	6	0.0094414	0.00670606	0.289911	0.0776635	0.0303636	0.779283	0.0180081	-0.953209	0.00325772	-1.30034	0.34654	-0.573742	0.106202	0.836609	0.953314	0.93877	0.969258	0.0449854	0.582116	0.219304	0.0454091	1.30871	0.20836	A2m	Genotype effect with no sex effect(real)
701	IMPC_DXA_010_001	Bone Area	0.684402	1	0.797464	0.617059	37	6	0.695445	0.00369123	0.651858	0.891345	0.0209938	0.959047	0.749582	0.139991	0.962485	-0.0233328	0.617237	0.324109	0.992161	0.841098	1.01015	1.00359	1.0176	0.0195383	0.769356	0.10106	0.0424801	1.1168	0.386569	Ahcy	Not significant
702	IMPC_DXA_010_001	Bone Area	0.16368	0.998245	0.970069	0.757792	36	6	0.491947	0.00947392	0.474261	0.684448	0.0488976	0.67619	0.50783	-0.275612	0.232009	-0.523249	0.991501	0.0069044	0.464019	0.997549	0.982965	0.974951	0.992675	0.0465928	0.62782	0.245817	0.0646683	1.15797	0.492711	Atp5b	Not significant
703	IMPC_DXA_010_001	Bone Area	0.498369	1	0.793414	0.821333	37	6	0.0179227	0.00127447	0.0490003	0.0841338	0.00587499	0.374441	0.0379118	-0.88724	0.00062808	-1.56746	0.756677	-0.189243	0.0247849	0.913874	0.932897	0.88266	0.982062	0.0167899	0.65775	0.076394	0.062812	2.03597	0.550478	Atp6v0d1	One sex_Female only
704	IMPC_DXA_010_001	Bone Area	0.580813	1	0.818702	0.615958	37	6	0.908653	0.00317998	0.387289	0.94399	0.0132146	0.71706	0.940124	0.0329635	0.55917	-0.288408	0.56155	0.374239	0.865777	0.750062	0.999683	0.988081	1.01194	0.0248234	0.736433	0.100373	0.0059838	1.39908	0.116082	C8a	Not significant
705	IMPC_DXA_010_001	Bone Area	0.485031	0.998245	0.753791	0.597539	36	6	0.000620506	0.0197259	0.880686	0.0128035	0.0730278	0.959438	0.00151423	-1.24368	0.00366812	-1.27856	0.0551884	-1.17827	0.121361	0.355658	0.924055	0.914379	0.935248	0.0543067	0.549562	0.214822	0.168595	0.649849	0.533374	Cdk4	Genotype effect with no sex effect(real)
706	IMPC_DXA_010_001	Bone Area	0.442039	1	0.960702	0.677364	37	6	0.0120724	0.0822465	0.0905832	0.042823	0.214755	0.343329	0.0181199	-1.00228	0.413992	-0.356971	0.0197116	-1.62934	0.626156	0.0903847	0.932276	0.981055	0.886667	0.021261	0.675394	0.0879432	0.547442	-0.596978	0.935057	Dhfr	Genotype effect with no sex effect(real)
707	IMPC_DXA_010_001	Bone Area	0.737504	1	0.869683	0.896918	37	6	0.499113	0.00505958	0.763748	0.830103	0.0249817	0.916032	0.533329	-0.272724	0.4714	-0.378658	0.816864	-0.146329	0.735039	0.982945	0.985348	0.987329	0.984593	0.0174725	0.757099	0.0948509	0.254757	0.989428	0.571383	Dync1li1	Not significant
708	IMPC_DXA_010_001	Bone Area	0.271216	1	0.908671	0.902649	37	6	0.202868	0.00765301	0.952344	0.377592	0.0272271	0.986655	0.246064	-0.504853	0.333556	-0.517765	0.451582	-0.47177	0.649556	0.722144	0.964226	0.960293	0.969107	0.0188953	0.746331	0.0731165	0.334501	0.792326	0.817739	G6pd2	Not significant
709	IMPC_DXA_010_001	Bone Area	0.655311	0.998245	0.913247	0.964013	36	6	0.00356021	0.0125675	0.784041	0.0405978	0.0409509	0.843646	0.00730699	-1.07036	0.00585574	-1.14781	0.130442	-0.959786	0.0587895	0.510665	0.938496	0.93728	0.941567	0.0348606	0.596133	0.145781	0.325591	0.784157	0.461886	Galc	Genotype effect with no sex effect(real)
7010	IMPC_DXA_010_001	Bone Area	0.444425	0.998245	0.993746	0.746216	36	6	0.36985	0.00501248	0.290911	0.684396	0.0317457	0.822677	0.459348	0.307738	0.892124	-0.057126	0.268534	0.708973	0.952266	0.70645	1.01792	0.995686	1.04141	0.0341652	0.65469	0.188459	0.0328879	1.42079	0.38153	Gnpda1	Not significant
7011	IMPC_DXA_010_001	Bone Area	0.29732	1	0.933954	0.968546	37	6	0.00536885	0.00244669	0.226958	0.0266951	0.0115252	0.669368	0.0134256	-1.04523	0.00109429	-1.46151	0.336959	-0.610884	0.0268862	0.56237	0.916151	0.883082	0.948864	0.0151329	0.668461	0.0657091	0.167819	1.51909	0.772941	Idh1	Genotype effect with no sex effect(real)
7012	IMPC_DXA_010_001	Bone Area	0.679824	0.998245	0.856104	0.769613	36	6	0.00226874	0.00372076	0.247424	0.012184	0.0145814	0.665748	0.00596146	-1.09478	0.000799136	-1.45996	0.239975	-0.696129	0.00980705	0.561233	0.928435	0.897687	0.959942	0.0331261	0.602396	0.128824	0.0170253	1.36622	0.117556	Iqgap1	Genotype effect with no sex effect(real)
7013	IMPC_DXA_010_001	Bone Area	0.620978	1	0.822701	0.834355	37	6	0.024681	0.00010501	0.00830614	0.121262	0.000784809	0.269179	0.55436	-0.258911	0.0119069	-1.19241	0.241927	0.69258	0.222368	0.431244	0.983615	0.927779	1.0382	0.0203132	0.665599	0.110941	0.0098439	2.55059	0.228741	Lmbrd1	One sex_Female only
7014	IMPC_DXA_010_001	Bone Area	0.266663	1	0.833338	0.876336	37	6	0.264395	0.00598775	0.213279	0.505364	0.0220524	0.62991	0.333777	0.421733	0.930626	-0.0438139	0.156893	0.904779	0.943118	0.634082	1.02954	0.997528	1.06137	0.0292803	0.647474	0.103178	0.16798	1.59607	0.576478	Mmachc	Not significant
7015	IMPC_DXA_010_001	Bone Area	0.178348	0.998245	0.962543	0.615919	36	6	0.00372329	0.0376869	0.029601	0.0346166	0.110269	0.29231	0.0147769	-0.980254	0.649145	-0.186963	0.00863979	-1.74164	0.839927	0.17841	0.947197	0.991208	0.906707	0.0522332	0.574242	0.194919	0.0922335	-0.98044	0.269868	Mvk	One sex_Male only
7016	IMPC_DXA_010_001	Bone Area	0.402822	1	0.923147	0.918544	37	6	0.294492	0.0155944	0.600796	0.550573	0.0508511	0.829605	0.33137	-0.423813	0.694914	-0.208488	0.338587	-0.619002	0.859778	0.606651	0.975685	0.990382	0.962747	0.0252735	0.745019	0.0957732	0.492094	0.334505	0.734786	Pmm2	Not significant
7017	IMPC_DXA_010_001	Bone Area	0.44598	1	0.786396	0.717662	37	6	0.865464	0.00792372	0.953834	0.949712	0.0280726	0.977483	0.861337	-0.0766423	0.930858	-0.0436779	0.892846	-0.089098	0.947673	0.965189	0.990572	0.995478	0.987022	0.0225021	0.758823	0.0885083	0.223497	0.713403	0.544051	Ptpn12	Not significant
7018	IMPC_DXA_010_001	Bone Area	0.24982	1	0.565139	0.637321	37	6	0.232626	0.0130491	0.428718	0.794013	0.0509233	0.937495	0.271604	-0.478886	0.123513	-0.778033	0.804491	-0.163023	0.898278	0.911881	0.982587	0.958638	1.00665	0.0325038	0.618527	0.117921	0.35365	1.23354	0.709635	Rock1	Not significant
7019	IMPC_DXA_010_001	Bone Area	0.323758	1	0.87899	0.842423	37	6	0.472398	0.00870544	0.85345	0.671438	0.0506498	0.910347	0.53502	0.271604	0.682113	0.209238	0.589264	0.353598	0.86446	0.777274	1.01588	1.0133	1.01952	0.0218428	0.726252	0.133137	0.359876	0.870612	0.664568	Ulk3	Not significant
7020	IMPC_DXA_010_001	Bone Area	0.191316	0.998245	0.860565	0.608428	36	6	0.177038	0.0121366	0.508783	0.43649	0.0578513	0.793592	0.207802	-0.520464	0.0882346	-0.745778	0.685912	-0.261303	0.407423	0.908198	0.977289	0.967066	0.989118	0.0421276	0.609233	0.215152	0.224369	1.09371	0.560539	Ywhaz	Not significant
65	IMPC_DXA_005_001	Bone Mineral Content (excluding skull)	0.114163	0.998245	0.845479	0.856474	36	6	0.0590547	0.00366333	0.091597	0.281512	0.0170606	0.452433	0.086926	-0.701365	0.000341566	-1.27027	0.877867	-0.0997837	0.0281108	0.953949	0.942847	0.904419	0.982102	0.0440833	0.588255	0.219304	0.0118557	1.75874	0.113676	A2m	Not significant
651	IMPC_DXA_005_001	Bone Mineral Content (excluding skull)	0.217203	0.998144	0.650174	0.315152	36	6	0.134002	0.0141469	0.585078	0.413683	0.0677564	0.930297	0.192276	0.538341	0.280158	0.355653	0.281763	0.755579	0.86034	0.743946	1.04122	1.02389	1.06095	0.0480224	0.621884	0.215485	0.0502773	1.02181	0.390373	Ahcy	Not significant
652	IMPC_DXA_005_001	Bone Mineral Content (excluding skull)	0.131495	0.998245	0.903457	0.328366	36	6	0.756226	0.0080188	0.217032	0.864258	0.0427669	0.536589	0.745234	-0.135519	0.078274	-0.574127	0.630287	0.335843	0.312853	0.922945	0.985894	0.959397	1.01407	0.0608859	0.589575	0.279448	0.0086576	1.49954	0.156298	Atp5b	Not significant
653	IMPC_DXA_005_001	Bone Mineral Content (excluding skull)	0.702409	1	0.251074	0.688458	37	6	0.0130311	0.00216489	0.105021	0.0648126	0.00951544	0.574304	0.0278584	-0.937006	7.82676e-05	-1.50252	0.598015	-0.353979	0.0139566	0.860987	0.906051	0.838782	0.970452	0.0164253	0.648043	0.076394	0.137348	1.79658	0.550478	Atp6v0d1	Genotype effect with no sex effect(real)
654	IMPC_DXA_005_001	Bone Mineral Content (excluding skull)	0.0720387	0.998139	0.873989	0.25439	36	6	0.696528	0.00833891	0.0315456	0.834941	0.031824	0.270344	0.705251	0.157711	0.356574	-0.298642	0.354381	0.646573	0.691581	0.59196	1.01557	0.976087	1.05605	0.0623772	0.585186	0.230945	0.00690215	1.5304	0.116082	C8a	Interaction_cannot classify2
655	IMPC_DXA_005_001	Bone Mineral Content (excluding skull)	0.100589	0.998245	0.45412	0.623522	36	6	0.00252	0.014542	0.576865	0.0313199	0.0562292	0.896279	0.00532651	-1.10801	0.000809165	-1.28302	0.165382	-0.902323	0.0971063	0.505075	0.907838	0.900115	0.918097	0.0584724	0.552032	0.214822	0.061552	0.932728	0.312976	Cdk4	Genotype effect with no sex effect(real)
656	IMPC_DXA_005_001	Bone Mineral Content (excluding skull)	0.499834	1	0.786419	0.584037	37	6	0.00285268	0.0616247	0.155965	0.015323	0.172917	0.435169	0.00531211	-1.16679	0.0985391	-0.640479	0.018645	-1.67478	0.369477	0.0876314	0.866324	0.936015	0.802873	0.0172292	0.67767	0.0746601	0.717255	-0.356631	0.937226	Dhfr	Genotype effect with no sex effect(real)
657	IMPC_DXA_005_001	Bone Mineral Content (excluding skull)	0.115793	0.998245	0.964713	0.641541	36	6	0.495129	0.0111756	0.431274	0.830103	0.0490486	0.79369	0.509965	-0.274234	0.134203	-0.549818	0.959456	0.034992	0.450893	0.982945	0.973104	0.956905	0.99155	0.0523415	0.605564	0.244927	0.102806	1.19037	0.417993	Dync1li1	Not significant
658	IMPC_DXA_005_001	Bone Mineral Content (excluding skull)	0.356012	1	0.35679	0.556115	37	6	0.229927	0.00408988	0.369462	0.395337	0.0168139	0.924852	0.279025	-0.471647	0.0730376	-0.802016	0.855935	-0.12207	0.333224	0.92843	0.945668	0.920635	0.970736	0.0239589	0.710727	0.0852936	0.0843811	1.39067	0.458973	G6pd2	Not significant
659	IMPC_DXA_005_001	Bone Mineral Content (excluding skull)	0.103916	0.998245	0.833989	0.534775	36	6	0.0684463	0.0135053	0.395275	0.205207	0.0421182	0.625507	0.0918093	-0.69113	0.00266688	-0.981371	0.595045	-0.368728	0.0490705	0.855115	0.940983	0.925565	0.958589	0.0476022	0.578903	0.180474	0.198346	1.19155	0.312907	Galc	Not significant
6510	IMPC_DXA_005_001	Bone Mineral Content (excluding skull)	0.199139	0.998245	0.666746	0.344994	36	6	0.118528	0.0139282	0.435771	0.460643	0.0793905	0.822677	0.174069	0.5607	0.382402	0.293174	0.216162	0.861532	0.764197	0.64175	1.05365	1.02344	1.08553	0.0525939	0.599512	0.236672	0.0673853	1.16787	0.477056	Gnpda1	Not significant
6511	IMPC_DXA_005_001	Bone Mineral Content (excluding skull)	0.134726	1	0.384052	0.766491	37	6	0.00522804	0.0038979	0.326809	0.0266951	0.0170176	0.768815	0.0123655	-1.05668	0.000500634	-1.3968	0.300099	-0.698853	0.0179227	0.539708	0.849801	0.789061	0.908009	0.0193536	0.654715	0.0787647	0.202346	1.35267	0.787391	Idh1	Genotype effect with no sex effect(real)
6512	IMPC_DXA_005_001	Bone Mineral Content (excluding skull)	0.527435	1	0.191469	0.395348	37	6	0.0344808	0.000238749	0.00947815	0.131194	0.00147402	0.269179	0.933366	-0.0366918	0.0186511	-0.975315	0.157734	0.918566	0.264846	0.368928	0.998649	0.903503	1.08923	0.0348033	0.615484	0.176502	0.0112531	2.50936	0.228741	Lmbrd1	One sex_Female only
6513	IMPC_DXA_005_001	Bone Mineral Content (excluding skull)	0.111281	0.998245	0.747518	0.589971	36	6	0.0549172	0.000705854	0.0174549	0.284393	0.00292425	0.376655	0.692392	-0.164945	0.00277415	-0.985347	0.296225	0.686605	0.100244	0.822934	0.992253	0.918013	1.06536	0.0541917	0.560679	0.189671	0.00393457	2.23263	0.0633903	Mfap4	Interaction_One sex_Female only2
6514	IMPC_DXA_005_001	Bone Mineral Content (excluding skull)	0.0421859	0.998245	0.787323	0.45876	36	6	0.0383066	0.178057	0.0250985	0.137555	0.351663	0.27611	0.0445214	-0.817506	0.681585	-0.146527	0.0394	-1.45767	0.842837	0.305189	0.929874	0.98885	0.877463	0.0673088	0.554638	0.239494	0.266241	-0.756507	0.519334	Mvk	One sex_Male only
6515	IMPC_DXA_005_001	Bone Mineral Content (excluding skull)	0.0379359	0.998245	0.84459	0.405194	36	6	0.0447435	0.000763162	0.00242732	0.175291	0.00277344	0.0516671	0.873043	0.0666795	0.024211	-0.797189	0.140988	0.959564	0.450931	0.39585	1.01666	0.940668	1.0915	0.0667596	0.522283	0.207381	0.0158612	2.27904	0.091331	Pebp1	One sex_Female only
6516	IMPC_DXA_005_001	Bone Mineral Content (excluding skull)	0.138491	0.998245	0.790603	0.300293	36	6	0.493531	0.00856532	0.219725	0.769191	0.032065	0.707999	0.57326	0.234604	0.547144	-0.200014	0.312259	0.702008	0.897562	0.781055	1.02171	0.986358	1.05833	0.057495	0.590168	0.201233	0.0271469	1.49219	0.264229	Phyh	Not significant
6517	IMPC_DXA_005_001	Bone Mineral Content (excluding skull)	0.140059	0.998154	0.838208	0.487449	36	6	0.00834641	0.113738	0.132785	0.030314	0.323547	0.315602	0.0120859	-1.0069	0.213677	-0.454221	0.0265268	-1.52724	0.509398	0.103393	0.911379	0.962116	0.866657	0.0459963	0.582049	0.193185	0.503236	-0.490966	0.83024	Pipox	Genotype effect with no sex effect(real)
6518	IMPC_DXA_005_001	Bone Mineral Content (excluding skull)	0.455499	1	0.476791	0.59721	37	6	0.00132991	0.0183277	0.702001	0.0129947	0.0603285	0.7811	0.00309881	-1.23088	0.00389605	-1.08517	0.0551659	-1.35919	0.118348	0.155647	0.890446	0.899848	0.883288	0.0231269	0.643788	0.0781174	0.69626	0.369761	0.998034	Plk1	Genotype effect with no sex effect(real)
6519	IMPC_DXA_005_001	Bone Mineral Content (excluding skull)	0.0396149	0.998245	0.934956	0.638126	36	6	0.219751	0.0433441	0.124503	0.478882	0.1161	0.504742	0.233977	-0.492293	0.346394	-0.351324	0.395635	-0.600566	0.782591	0.631005	0.954577	0.974879	0.938627	0.0642988	0.588516	0.210432	0.585306	0.339273	0.790955	Pmm2	Not significant
6520	IMPC_DXA_005_001	Bone Mineral Content (excluding skull)	0.765745	1	0.512212	0.736946	36	6	3.24073e-05	0.0544443	0.293233	0.000285589	0.156666	0.584532	9.05331e-05	-1.53741	0.00086846	-1.17756	0.00574519	-1.86652	0.0154426	0.0289387	0.845606	0.882292	0.813884	0.0413242	0.553199	0.1307	0.83092	-0.135758	0.93063	Pttg1	Genotype effect with no sex effect(real)
6521	IMPC_DXA_005_001	Bone Mineral Content (excluding skull)	0.542178	1	0.180882	0.64316	37	6	0.04008	0.00875033	0.513103	0.422506	0.0358988	0.937495	0.0633154	-0.797872	0.0232576	-1.03308	0.415792	-0.544536	0.420925	0.831471	0.929219	0.904797	0.953687	0.0275652	0.670792	0.102385	0.191956	1.15934	0.572002	Rock1	Genotype effect with no sex effect(real)
6522	IMPC_DXA_005_001	Bone Mineral Content (excluding skull)	0.0641372	1	0.287064	0.473195	37	6	0.90984	0.0232893	0.802012	0.975208	0.109789	0.869979	0.901678	-0.0542123	0.899789	0.0554986	0.840513	-0.145598	0.951843	0.91818	0.999989	1.00431	0.997765	0.0412203	0.678051	0.2294	0.505465	0.476955	0.709537	Ulk3	Not significant
6523	IMPC_DXA_005_001	Bone Mineral Content (excluding skull)	0.1135	0.99813	0.797009	0.494487	36	6	0.454007	0.0084091	0.256965	0.70339	0.0462501	0.793592	0.473829	-0.29795	0.0601028	-0.697939	0.841899	0.135057	0.318322	0.933268	0.975224	0.948976	1.00313	0.0511345	0.594326	0.235203	0.0842204	1.42732	0.364955	Ywhaz	Not significant
64	IMPC_DXA_004_001	Bone Mineral Density (excluding skull)	0.26245	0.999742	0.230534	0.568772	37	6	0.480829	0.0112321	0.0141878	0.783751	0.0469443	0.154174	0.493849	-0.298232	0.00623009	-1.02008	0.542747	0.437488	0.11531	0.890201	0.989986	0.96516	1.01486	0.105075	0.513253	0.390279	0.00201816	1.97082	0.0767043	A2m	Interaction_One sex_Female only2
641	IMPC_DXA_004_001	Bone Mineral Density (excluding skull)	0.257149	0.999976	0.645282	0.45663	37	6	0.0295434	0.0502083	0.026858	0.349425	0.182758	0.639189	0.0346735	0.900151	0.0269272	0.81672	0.179787	0.998309	0.831246	0.7111	1.03638	1.02867	1.04457	0.0913619	0.544921	0.348149	0.0688504	0.726511	0.432096	Ahcy	One sex_Female only
642	IMPC_DXA_004_001	Bone Mineral Density (excluding skull)	0.25932	0.999974	0.310987	0.357433	37	6	0.857243	0.018802	0.0525766	0.935145	0.0835646	0.373462	0.861406	0.0764501	0.18871	-0.491923	0.373914	0.658622	0.408022	0.857444	1.00469	0.985667	1.0239	0.120263	0.510561	0.427913	0.00155558	1.66111	0.124447	Atp5b	Not significant
643	IMPC_DXA_004_001	Bone Mineral Density (excluding skull)	0.550273	0.999996	0.227166	0.551913	37	6	0.0489987	0.0246569	0.326867	0.146996	0.0913754	0.615101	0.0560456	-0.819213	0.00104378	-1.18634	0.553059	-0.438274	0.0316612	0.846045	0.968095	0.950606	0.985788	0.0734958	0.510993	0.272984	0.312502	1.25906	0.663628	Atp6v0d1	Genotype effect with no sex effect(real)
644	IMPC_DXA_004_001	Bone Mineral Density (excluding skull)	0.189388	0.999983	0.208225	0.332281	37	6	0.214273	0.0257921	0.0297177	0.396723	0.0846161	0.270344	0.228077	0.523283	0.903595	-0.0462665	0.131555	1.10583	0.988219	0.479788	1.0207	0.996251	1.04522	0.125449	0.481055	0.362725	0.054018	1.63316	0.262982	C8a	Interaction_cannot classify2
645	IMPC_DXA_004_001	Bone Mineral Density (excluding skull)	0.101908	0.999975	0.427199	0.599384	37	6	0.278283	0.0689922	0.20301	0.47011	0.206977	0.679301	0.292685	-0.457771	0.15739	-0.556346	0.649212	-0.345859	0.398381	0.808646	0.984759	0.986329	0.98385	0.135966	0.493426	0.389463	0.312161	0.703912	0.708551	Cdk4	Not significant
646	IMPC_DXA_004_001	Bone Mineral Density (excluding skull)	0.121825	0.999993	0.154804	0.611844	37	6	0.00037028	0.200213	0.000823339	0.00497233	0.432644	0.0213376	0.000548231	-1.4101	0.018309	-0.915702	0.00772203	-1.89094	0.150023	0.0649322	0.927581	0.953252	0.903101	0.0744826	0.501347	0.25577	0.553217	-0.47389	0.935057	Dhfr	Different size
647	IMPC_DXA_004_001	Bone Mineral Density (excluding skull)	0.306975	0.999999	0.183867	0.36545	36	6	0.644959	0.0258772	0.0523173	0.885602	0.106426	0.285495	0.654968	-0.191228	0.0127587	-0.793732	0.554166	0.436355	0.111993	0.982945	0.991463	0.97469	1.00904	0.165034	0.451419	0.491867	0.000512047	1.68151	0.0401957	Dync1li1	Not significant
648	IMPC_DXA_004_001	Bone Mineral Density (excluding skull)	0.12336	0.999945	0.310754	0.484425	37	6	0.938781	0.0262911	0.098646	0.95454	0.0744239	0.307642	0.940581	0.0326351	0.284503	-0.420512	0.500905	0.499511	0.523486	0.817609	1.00371	0.988975	1.01873	0.122323	0.507956	0.341432	0.0392954	1.42798	0.144326	Galc	Not significant
649	IMPC_DXA_004_001	Bone Mineral Density (excluding skull)	0.20971	0.999977	0.600688	0.457381	37	6	0.0186822	0.05003	0.0168588	0.1585	0.203694	0.492676	0.0224504	0.968428	0.0269751	0.815254	0.124397	1.13583	0.478317	0.483453	1.03671	1.02933	1.04457	0.0985973	0.52639	0.360504	0.0432249	0.846965	0.432249	Gnpda1	One sex_Female only
6410	IMPC_DXA_004_001	Bone Mineral Density (excluding skull)	0.000842038	0.999996	0.0548882	0.429374	37	6	0.00700295	0.0205571	0.381203	0.0320383	0.0750963	0.793433	0.00885856	-1.10075	0.000774788	-1.41406	0.262518	-0.773416	0.0231145	0.505276	0.922027	0.891069	0.952842	0.0719852	0.519318	0.251948	0.23282	1.15996	0.801438	Idh1	Genotype effect with no sex effect(real)
6411	IMPC_DXA_004_001	Bone Mineral Density (excluding skull)	0.0971314	0.999958	0.223926	0.351551	37	6	0.407683	0.0188113	0.028277	0.832592	0.0592964	0.455574	0.421636	0.350464	0.456172	-0.285733	0.169983	0.999991	0.806646	0.785481	1.01939	0.992944	1.04587	0.120228	0.493246	0.317583	0.0219598	1.77897	0.144735	Mfap4	Interaction_cannot classify2
6412	IMPC_DXA_004_001	Bone Mineral Density (excluding skull)	0.127092	0.999969	0.114166	0.692896	37	6	0.325554	0.162244	0.266494	0.530284	0.328648	0.511384	0.340008	-0.415719	0.994659	0.00302556	0.268248	-0.82042	0.995386	0.580591	0.983778	0.998897	0.969638	0.110431	0.51964	0.331293	0.730272	-0.303806	0.951061	Mvk	Not significant
6413	IMPC_DXA_004_001	Bone Mineral Density (excluding skull)	0.032358	0.999933	0.185626	0.368947	37	6	0.711899	0.0780664	0.320691	0.827555	0.208524	0.699286	0.720026	0.15682	0.925271	-0.0355308	0.640604	0.36148	0.969857	0.856211	1.00854	0.998236	1.01924	0.152955	0.455469	0.410234	0.424095	0.85248	0.76532	Npc2	Not significant
6414	IMPC_DXA_004_001	Bone Mineral Density (excluding skull)	0.242304	0.999993	0.110607	0.453666	37	6	0.0069987	0.000169264	0.00163292	0.0744861	0.000663694	0.048661	0.988793	0.00615642	0.00370148	-1.14904	0.0796578	1.17342	0.18384	0.269162	1.00502	0.963837	1.04587	0.115764	0.446753	0.307302	0.00865182	2.76922	0.091331	Pebp1	One sex_Female only
6415	IMPC_DXA_004_001	Bone Mineral Density (excluding skull)	0.0683377	0.999869	0.197531	0.313732	37	6	0.267687	0.0251402	0.0387368	0.574973	0.0803549	0.471297	0.282035	0.467418	0.859254	-0.0676127	0.16734	1.01576	0.950387	0.621042	1.02233	0.998236	1.04651	0.125873	0.492331	0.338889	0.0199569	1.5757	0.264229	Phyh	Interaction_cannot classify2
6416	IMPC_DXA_004_001	Bone Mineral Density (excluding skull)	0.266316	0.999992	0.340859	0.517905	37	6	0.00703247	0.146187	0.0135836	0.0288837	0.360774	0.096467	0.00889394	-1.10012	0.0620075	-0.716852	0.0470305	-1.46929	0.376207	0.134124	0.951885	0.975744	0.92919	0.0738596	0.521366	0.264814	0.82046	-0.231072	0.932702	Pipox	One sex_Male only
6417	IMPC_DXA_004_001	Bone Mineral Density (excluding skull)	0.251581	0.999993	0.287743	0.542781	37	6	0.00618303	0.106252	0.0144233	0.0238273	0.266473	0.237243	0.00787294	-1.11587	0.00312381	-1.0457	0.118321	-1.17307	0.118348	0.222556	0.957313	0.959868	0.955426	0.104463	0.479814	0.299593	0.708901	0.352447	0.998034	Plk1	One sex_Female only
6418	IMPC_DXA_004_001	Bone Mineral Density (excluding skull)	0.133598	0.999497	0.0747713	0.521561	37	6	0.346155	0.112856	0.309078	0.590037	0.248947	0.724401	0.360548	-0.397538	0.58367	-0.224971	0.463954	-0.556504	0.807884	0.681605	0.984105	0.992282	0.976744	0.122513	0.503191	0.320763	0.844403	0.171658	0.937684	Pmm2	Not significant
6419	IMPC_DXA_004_001	Bone Mineral Density (excluding skull)	0.45489	0.999995	0.209285	0.668841	37	6	5.73347e-05	0.0913579	0.366798	0.000425484	0.222094	0.623115	9.39494e-05	-1.56284	0.000876178	-1.24988	0.00761742	-1.86251	0.0154426	0.0357231	0.931502	0.947299	0.916667	0.0758426	0.491337	0.219459	0.843809	-0.121291	0.936984	Pttg1	Genotype effect with no sex effect(real)
6420	IMPC_DXA_004_001	Bone Mineral Density (excluding skull)	0.254392	0.999996	0.19535	0.7187	37	6	0.00409473	0.0356711	0.783051	0.109193	0.111909	0.937495	0.00532891	-1.16544	0.00120778	-1.25951	0.140098	-1.0573	0.0644149	0.831471	0.948165	0.942668	0.954134	0.0709558	0.520719	0.237167	0.456028	0.722931	0.779661	Rock1	Genotype effect with no sex effect(real)
6421	IMPC_DXA_004_001	Bone Mineral Density (excluding skull)	0.169294	0.999993	0.245873	0.461602	37	6	0.174167	0.139148	0.205263	0.384369	0.403387	0.58889	0.187196	-0.571943	0.458649	-0.282685	0.272986	-0.84753	0.751376	0.659287	0.979208	0.991621	0.967708	0.116176	0.505831	0.391329	0.947273	-0.0590141	0.998299	Ulk3	Not significant
6422	IMPC_DXA_004_001	Bone Mineral Density (excluding skull)	0.138518	0.999995	0.264475	0.483979	37	6	0.960526	0.019164	0.0689794	0.968479	0.0790813	0.631787	0.961688	0.0210561	0.23909	-0.472189	0.469999	0.528619	0.616231	0.82975	0.998808	0.982359	1.0155	0.0994603	0.52978	0.348098	0.0715125	1.53059	0.337222	Ywhaz	Not significant
49	IMPC_CBC_009_001	Calcium	0.19464	1	0.971872	0.91181	40	6	0.614362	0.415769	0.818267	0.870791	0.648428	0.910757	0.62414	-0.21354	0.788319	-0.171854	0.680635	-0.255227	0.958926	0.912369	0.994332	0.995077	0.993591	0.462534	0.242666	0.784297	0.782075	0.159293	0.881311	A2m	Not significant
491	IMPC_CBC_009_001	Calcium	0.608374	1	0.993453	0.978739	40	6	0.621368	0.372978	0.761965	0.847419	0.714547	0.959047	0.631	0.209349	0.92208	0.0636119	0.558425	0.355085	0.992161	0.841098	1.00312	0.998668	1.00754	0.503649	0.215574	0.800123	0.538334	0.507048	0.893983	Ahcy	Not significant
492	IMPC_CBC_009_001	Calcium	0.225592	1	0.988611	0.942352	40	6	0.0626194	0.436768	0.248725	0.171523	0.705549	0.607403	0.070186	-0.775584	0.20491	-0.791974	0.216592	-0.759194	0.414129	0.601998	0.976706	0.978569	0.974856	0.495332	0.217314	0.745045	0.660169	0.250094	0.849134	Atp6v0d1	Not significant
493	IMPC_CBC_009_001	Calcium	0.499768	1	0.978941	0.933572	40	6	0.621985	0.485196	0.862054	0.786396	0.731706	0.948259	0.631604	0.208972	0.68724	0.259383	0.797593	0.158561	0.920466	0.927235	1.00394	1.00785	1.00006	0.519578	0.212148	0.774873	0.858488	0.111326	0.976943	C8a	Not significant
494	IMPC_CBC_009_001	Calcium	0.619355	1	0.896877	0.880209	40	6	0.0434521	0.0444959	0.0985373	0.104731	0.137773	0.346288	0.811248	-0.104189	0.131722	0.918045	0.069114	-1.12642	0.419042	0.199899	0.997243	1.02904	0.965663	0.455536	0.234291	0.737636	0.0116086	-1.81018	0.436482	Dhfr	Genotype effect with no sex effect(real)
495	IMPC_CBC_009_001	Calcium	0.322321	1	0.978558	0.940354	40	6	0.918696	0.509166	0.918737	0.973128	0.78105	0.948479	0.920926	0.0433208	0.82752	0.141806	0.928354	-0.0551643	0.931703	0.982945	0.998558	1.00272	0.99443	0.51294	0.213962	0.827879	0.98162	0.0169914	0.987913	Dync1li1	Not significant
496	IMPC_CBC_009_001	Calcium	0.326671	1	0.979051	0.929714	40	6	0.829689	0.392057	0.821467	0.897859	0.647595	0.963115	0.834307	-0.09127	0.698378	-0.246833	0.917798	0.0642932	0.862262	0.953891	0.994034	0.988601	0.999429	0.534548	0.203125	0.792913	0.467757	0.514251	0.89973	G6pd2	Not significant
497	IMPC_CBC_009_001	Calcium	0.0975024	1	0.857373	0.89668	40	6	0.00419216	0.246129	0.00724634	0.0405978	0.471534	0.0948511	0.00535669	1.16302	0.313302	0.600261	0.00323463	1.72578	0.538762	0.0910732	1.05035	1.02605	1.07447	0.521626	0.182329	0.766246	0.142009	1.30785	0.273378	Galc	One sex_Male only
498	IMPC_CBC_009_001	Calcium	0.253629	1	0.88687	0.886459	40	6	0.00228351	0.459383	0.987926	0.0354982	0.741081	0.993738	0.00300747	1.23186	0.0397128	1.23763	0.0413736	1.22609	0.478317	0.354421	1.04702	1.04576	1.04826	0.516086	0.192083	0.808219	0.78336	0.180543	0.955678	Gnpda1	Genotype effect with no sex effect(real)
499	IMPC_CBC_009_001	Calcium	0.621869	1	0.981975	0.935662	40	6	0.874513	0.429993	0.884642	0.948714	0.67427	0.959702	0.877939	0.0670172	0.945449	0.0440403	0.884338	0.089994	0.996606	0.965222	1.00015	0.998738	1.00156	0.500842	0.21885	0.749122	0.736089	0.264804	0.973009	Idh1	Not significant
4910	IMPC_CBC_009_001	Calcium	0.625016	1	0.993047	0.965488	40	6	0.320159	0.37969	0.60909	0.621754	0.567578	0.830017	0.333654	0.419658	0.607581	0.326566	0.406248	0.512751	0.881718	0.710586	1.01094	1.00933	1.01254	0.49031	0.225787	0.738447	0.472263	0.411972	0.743035	Iqgap1	Not significant
4911	IMPC_CBC_009_001	Calcium	0.466345	1	0.964261	0.871003	40	6	0.00678347	0.340427	0.0294214	0.0688038	0.597947	0.364058	0.00846385	1.10468	0.176146	0.807304	0.0211167	1.40206	0.733392	0.243502	1.03867	1.02693	1.05032	0.526084	0.193597	0.83937	0.0925603	0.788358	0.381131	Lmbrd1	One sex_Male only
4912	IMPC_CBC_009_001	Calcium	0.142852	1	0.991735	0.952007	40	6	0.050643	0.590368	0.2191	0.271972	0.745683	0.661865	0.0573311	-0.812619	0.343359	-0.594528	0.0919673	-1.03071	0.79705	0.701856	0.979635	0.984729	0.974576	0.511031	0.210541	0.718571	0.610501	-0.22564	0.847537	Mfap4	Not significant
4913	IMPC_CBC_009_001	Calcium	0.798953	1	0.982783	0.937524	40	6	0.0253463	0.56087	0.136682	0.194114	0.766066	0.628726	0.0296559	0.923791	0.0794478	1.0816	0.212804	0.765982	0.476049	0.634082	1.02732	1.03457	1.02012	0.510577	0.207106	0.733645	0.832234	-0.108512	0.952025	Mmachc	Genotype effect with no sex effect(real)
4914	IMPC_CBC_009_001	Calcium	0.552052	1	0.966628	0.73471	40	6	0.00245854	0.479754	0.943812	0.0313016	0.719099	0.981693	0.00322607	1.22379	0.0461617	1.25071	0.0376885	1.19686	0.233519	0.305189	1.04167	1.04203	1.0413	0.521985	0.189381	0.790729	0.840753	0.135528	0.960818	Mvk	Genotype effect with no sex effect(real)
4915	IMPC_CBC_009_001	Calcium	0.845326	1	0.978829	0.900868	40	6	0.0484958	0.389361	0.188235	0.330234	0.639383	0.678809	0.0550127	0.819943	0.24861	0.702195	0.133543	0.937692	0.687684	0.894427	1.02523	1.02	1.03043	0.502717	0.21436	0.78264	0.2913	0.449857	0.650783	Nek2	Genotype effect with no sex effect(real)
4916	IMPC_CBC_009_001	Calcium	0.294145	1	0.974188	0.916886	40	6	0.496049	0.384738	0.694263	0.665639	0.629207	0.846232	0.507979	0.288185	0.885639	0.0912493	0.435187	0.48512	0.961551	0.797477	1.00796	1.00113	1.01474	0.538679	0.19609	0.758141	0.506584	0.589961	0.795338	Npc2	Not significant
4917	IMPC_CBC_009_001	Calcium	0.164325	1	0.997564	0.980579	40	6	0.560211	0.317225	0.598902	0.732205	0.502835	0.796874	0.571055	-0.246771	0.384399	-0.549551	0.927983	0.0560099	0.907226	0.97771	0.994209	0.98765	1.00072	0.529775	0.205378	0.709607	0.196502	0.810939	0.436996	Pebp1	Not significant
4918	IMPC_CBC_009_001	Calcium	0.301858	1	0.988022	0.98046	40	6	0.204516	0.680507	0.482805	0.523847	0.865916	0.869744	0.217243	-0.533827	0.755617	-0.193521	0.166234	-0.874133	0.92677	0.621042	0.981424	0.991065	0.97185	0.51419	0.206382	0.795374	0.576269	-0.474229	0.867374	Phyh	Not significant
4919	IMPC_CBC_009_001	Calcium	0.443883	1	0.996728	0.993317	40	6	0.22597	0.194057	0.125367	0.313508	0.439483	0.306453	0.238996	-0.509843	0.0657606	-1.15226	0.823471	0.132573	0.376207	0.899393	0.983546	0.967024	0.999953	0.528516	0.200306	0.842126	0.00652945	1.48514	0.415903	Pipox	Not significant
4920	IMPC_CBC_009_001	Calcium	0.243446	1	0.910997	0.848922	40	6	0.117422	0.420423	0.371064	0.187241	0.672499	0.528182	0.127849	-0.65577	0.317335	-0.651207	0.26538	-0.660334	0.642808	0.384679	0.981178	0.979308	0.983035	0.470706	0.230711	0.704159	0.737649	0.221583	0.998034	Plk1	Not significant
4921	IMPC_CBC_009_001	Calcium	0.341845	1	0.938055	0.844293	40	6	0.118885	0.605168	0.399153	0.334331	0.744059	0.764109	0.129371	-0.653244	0.47711	-0.452545	0.163288	-0.853943	0.790328	0.488766	0.982353	0.988988	0.975765	0.529673	0.199939	0.786319	0.782515	-0.201458	0.915204	Pmm2	Not significant
4922	IMPC_CBC_009_001	Calcium	0.303382	1	0.978723	0.894848	40	6	0.979897	0.673893	0.865452	0.979897	0.824223	0.955473	0.980451	-0.0106923	0.627591	0.303911	0.610314	-0.325296	0.810638	0.941587	0.997646	1.00736	0.987999	0.539056	0.202231	0.775714	0.508849	-0.426976	0.778979	Ptpn12	Not significant
4923	IMPC_CBC_009_001	Calcium	0.602764	1	0.94832	0.849529	40	6	0.00805	0.324862	0.0326816	0.0544333	0.587302	0.319883	0.00995977	1.08307	0.187806	0.781954	0.0237524	1.38419	0.512499	0.304158	1.03498	1.02429	1.0456	0.512044	0.201409	0.799351	0.0562669	0.803641	0.295922	Sra1	One sex_Male only
4924	IMPC_CBC_009_001	Calcium	0.550816	1	0.899743	0.78695	40	6	0.92253	0.891094	0.428576	0.975208	0.974872	0.701274	0.924656	0.0412716	0.238439	0.733403	0.301633	-0.65086	0.571337	0.688774	0.997962	1.0169	0.979155	0.49916	0.219694	0.779896	0.067557	-1.16457	0.333989	Ulk3	Not significant
4925	IMPC_CBC_009_001	Calcium	0.278611	1	0.976292	0.843647	40	6	0.0206375	0.417628	0.104738	0.155324	0.656361	0.631787	0.0243869	-0.954413	0.0992951	-1.04291	0.143543	-0.865918	0.418076	0.615556	0.969147	0.966953	0.971326	0.502037	0.2078	0.771679	0.551117	0.38479	0.788097	Ywhaz	Genotype effect with no sex effect(real)
164	IMPC_OFD_017_001	Center average speed	0.473735	0.99763	0.589951	0.569589	39	6	0.0178067	0.127055	0.0165984	0.131932	0.323593	0.169096	0.0212749	0.928618	0.378347	0.428523	0.0228128	1.43603	0.890249	0.265606	1.1122	1.03894	1.1839	0.323195	0.285136	0.720263	0.0449091	1.29264	0.20836	A2m	One sex_Male only
1641	IMPC_OFD_017_001	Center average speed	0.124924	1	0.978058	0.671397	40	6	0.0660709	0.088962	0.0280962	0.349425	0.272637	0.639189	0.446909	0.330784	0.0436403	1.23256	0.359271	-0.570989	0.831246	0.778421	1.0397	1.14395	0.937542	0.52049	0.198296	0.806068	0.081088	-1.60525	0.476065	Ahcy	Interaction_One sex_Female only2
1642	IMPC_OFD_017_001	Center average speed	0.684437	0.997186	0.589843	0.673636	39	6	0.0869135	0.20367	0.195052	0.269516	0.478873	0.536589	0.0961551	0.680665	0.18456	0.667234	0.282032	0.702956	0.40776	0.775374	1.0746	1.0674	1.08251	0.26146	0.345502	0.637863	0.463233	0.381224	0.719585	Atp5b	Not significant
1643	IMPC_OFD_017_001	Center average speed	0.210985	0.985284	0.853012	0.556806	38	6	0.0326638	0.794883	0.307437	0.114323	0.944861	0.615101	0.038005	0.797439	0.0152466	1.17056	0.48133	0.43304	0.126131	0.794963	1.10222	1.14736	1.05979	0.540299	0.165755	0.786676	0.560848	-0.571767	0.794531	Atp6v0d1	Genotype effect with no sex effect(real)
1644	IMPC_OFD_017_001	Center average speed	0.523843	0.985313	0.870868	0.487543	38	6	0.000755551	0.438264	0.922987	0.0282576	0.688752	0.971972	0.00106779	1.21135	0.00493801	1.24862	0.0511628	1.18396	0.154494	0.336273	1.14233	1.15257	1.13393	0.486167	0.18756	0.763296	0.801678	0.122899	0.952435	C8a	Genotype effect with no sex effect(real)
1645	IMPC_OFD_017_001	Center average speed	0.138744	1	0.988289	0.959258	40	6	0.00313822	0.523654	0.025881	0.0341281	0.799262	0.321664	0.00406812	1.19646	0.0573399	1.10652	0.039234	1.28641	0.245569	0.307191	1.15621	1.15681	1.15561	0.585749	0.158433	0.877405	0.691438	0.338328	0.859358	Cdk4	One sex_Male only
1646	IMPC_OFD_017_001	Center average speed	0.294239	0.997621	0.900681	0.679489	39	6	0.744623	0.208941	0.560745	0.790899	0.446374	0.793311	0.751569	-0.131576	0.4146	-0.370504	0.870307	0.114451	0.626156	0.92334	0.994659	0.95719	1.03171	0.315141	0.276888	0.644445	0.584357	0.761842	0.935057	Dhfr	Not significant
1647	IMPC_OFD_017_001	Center average speed	0.200663	0.985284	0.63343	0.808814	38	6	0.00582413	0.0282287	0.00778168	0.0689993	0.111503	0.122951	0.081372	0.674896	0.000198298	1.62428	0.669204	-0.263942	0.00783276	0.982945	1.09417	1.21077	0.982147	0.44047	0.200373	0.77679	0.105359	-1.68785	0.417993	Dync1li1	One sex_Female only
1648	IMPC_OFD_017_001	Center average speed	0.00138877	1	0.879795	0.542343	40	6	0.00355982	0.625527	0.699286	0.0284722	0.858005	0.963115	0.0045858	1.18205	0.0325145	1.33102	0.0787398	1.03308	0.171862	0.494336	1.22776	1.28832	1.16842	0.554444	0.165902	0.808876	0.903175	-0.132043	0.995159	G6pd2	Genotype effect with no sex effect(real)
1649	IMPC_OFD_017_001	Center average speed	0.354058	1	0.995225	0.814643	40	6	0.0232602	0.982586	0.0526084	0.115672	0.982586	0.237568	0.0273279	0.936641	0.00536595	1.69875	0.771115	0.174527	0.0587895	0.893794	1.11208	1.20823	1.01787	0.523459	0.192913	0.766246	0.0569837	-1.33131	0.170951	Galc	Genotype effect with no sex effect(real)
16410	IMPC_OFD_017_001	Center average speed	0.21374	1	0.846742	0.707718	40	6	0.584465	0.781166	0.793256	0.817157	0.911188	0.907413	0.594847	-0.231684	0.841321	0.109461	0.417505	-0.572829	0.933421	0.884585	0.995056	1.01308	0.977398	0.574608	0.168361	0.833906	0.690716	-0.513929	0.954782	Gnpda1	Not significant
16411	IMPC_OFD_017_001	Center average speed	0.308047	1	0.966223	0.666071	40	6	0.0433109	0.728368	0.357556	0.119271	0.931271	0.790155	0.0493945	0.838858	0.0528146	1.21015	0.44405	0.467565	0.197555	0.624022	1.10019	1.14206	1.05917	0.527553	0.19176	0.769348	0.553277	-0.550825	0.942588	Idh1	Genotype effect with no sex effect(real)
16412	IMPC_OFD_017_001	Center average speed	0.319874	0.999998	0.973118	0.689293	40	6	0.662353	0.981114	0.458927	0.738696	0.988072	0.664976	0.671091	0.184895	0.177332	0.831795	0.466975	-0.462005	0.733392	0.637601	1.02311	1.0997	0.948074	0.576629	0.175515	0.880444	0.235023	-1.11829	0.579881	Lmbrd1	Not significant
16413	IMPC_OFD_017_001	Center average speed	0.385399	0.997498	0.979828	0.574444	39	6	0.00926153	0.412055	0.243844	0.097544	0.626455	0.709336	0.0114322	1.01334	0.00505397	1.44787	0.347792	0.587101	0.110467	0.822934	1.12397	1.18252	1.06847	0.264938	0.323165	0.529877	0.409287	-0.537599	0.698196	Mfap4	Genotype effect with no sex effect(real)
16414	IMPC_OFD_017_001	Center average speed	0.000473858	0.997781	0.929997	0.991747	39	6	0.122303	0.810186	0.480174	0.341016	0.886508	0.732387	0.133165	0.61636	0.315625	0.564693	0.287199	0.669456	0.62956	0.736298	1.13979	1.10867	1.17089	0.832739	0.0556813	0.920329	0.913234	0.160444	0.984958	Mmachc	Not significant
16415	IMPC_OFD_017_001	Center average speed	0.0636191	0.997725	0.875632	0.837372	39	6	0.10926	0.736375	0.430111	0.269735	0.894979	0.659782	0.119588	0.638187	0.250566	0.53898	0.288135	0.739178	0.549854	0.590664	1.08861	1.05208	1.12505	0.805038	0.0695567	0.936963	0.82384	0.269756	0.960818	Mvk	Not significant
16416	IMPC_OFD_017_001	Center average speed	0.650643	0.997482	0.715835	0.732129	39	6	0.149204	0.179745	0.224213	0.547081	0.377994	0.69736	0.160978	0.576246	0.494947	0.346703	0.211084	0.81364	0.850343	0.894427	1.07019	1.03722	1.10295	0.305702	0.306195	0.651773	0.359437	0.773132	0.694588	Nek2	Not significant
16417	IMPC_OFD_017_001	Center average speed	0.295235	0.984464	0.968654	0.778215	38	6	0.0704143	0.442135	0.264775	0.21829	0.604387	0.585716	0.0788811	0.680201	0.13197	0.709994	0.292899	0.661811	0.689406	0.585798	1.08162	1.08162	1.08313	0.447463	0.216664	0.672192	0.834246	0.168482	0.93747	Pebp1	Not significant
16418	IMPC_OFD_017_001	Center average speed	0.291795	0.984409	0.879082	0.636605	38	6	0.574398	0.963913	0.253194	0.667825	0.983064	0.456256	0.585464	-0.214686	0.301743	0.514605	0.12756	-0.934321	0.587142	0.272837	0.992525	1.08459	0.904257	0.487931	0.183478	0.796954	0.309452	-1.26545	0.802222	Pipox	Not significant
16419	IMPC_OFD_017_001	Center average speed	0.467291	0.997478	0.999994	0.899375	39	6	0.657096	0.640192	0.437276	0.720981	0.789079	0.580585	0.666153	-0.179214	0.404558	0.427478	0.242148	-0.778518	0.717032	0.360938	0.990037	1.05456	0.928662	0.304974	0.288148	0.587041	0.479226	-0.917848	0.998034	Plk1	Not significant
16420	IMPC_OFD_017_001	Center average speed	0.313575	1	0.914712	0.558832	40	6	0.0203447	0.620735	0.11788	0.12078	0.756994	0.504742	0.0240576	0.956419	0.0639931	1.14213	0.208756	0.770704	0.398761	0.488766	1.11626	1.14332	1.08974	0.528267	0.189698	0.786319	0.840307	-0.181732	0.937684	Pmm2	Genotype effect with no sex effect(real)
16421	IMPC_OFD_017_001	Center average speed	0.54893	0.997646	0.992884	0.936362	39	6	0.718928	0.407276	0.781011	0.857183	0.689452	0.943793	0.726515	0.145355	0.500177	0.352942	0.934054	-0.0549952	0.707896	0.965189	1.03058	1.05819	1.00486	0.277049	0.282207	0.605403	0.937746	-0.12573	0.937746	Ptpn12	Not significant
16422	IMPC_OFD_017_001	Center average speed	0.326387	0.98443	0.996345	0.560926	38	6	0.513559	0.951349	0.393032	0.696173	1	0.636982	0.525754	-0.249592	0.512445	0.356385	0.147189	-0.846236	0.776933	0.351188	0.985538	1.07228	0.902436	0.508589	0.177344	0.777918	0.401755	-1.02528	0.735876	Pttg1	Not significant
16423	IMPC_OFD_017_001	Center average speed	0.126975	1	0.999815	0.968092	40	6	0.639092	0.184093	0.16315	0.926134	0.392731	0.937495	0.648345	0.19877	0.351078	-0.52337	0.162461	0.92091	0.985589	0.831471	1.03094	0.939736	1.1203	0.541231	0.187657	0.760649	0.098019	1.63194	0.445286	Rock1	Not significant
16424	IMPC_OFD_017_001	Center average speed	0.461038	0.996707	0.876065	0.859617	39	6	0.0198731	0.29321	0.0844087	0.0938449	0.562646	0.413311	0.023615	-0.913248	0.0708573	-0.866691	0.150148	-0.952291	0.335177	0.62315	0.898439	0.901552	0.896241	0.293458	0.293066	0.676749	0.841829	0.207466	0.927712	Sra1	Genotype effect with no sex effect(real)
16425	IMPC_OFD_017_001	Center average speed	0.0295906	1	0.979309	0.68664	40	6	0.0645306	0.978733	0.113935	0.192091	0.985222	0.58889	0.0722267	0.770142	0.019859	1.40786	0.832393	0.132428	0.321352	0.91818	1.11678	1.21898	1.01663	0.587657	0.159018	0.831728	0.322521	-1.11641	0.626889	Ulk3	Not significant
16426	IMPC_OFD_017_001	Center average speed	0.0760225	0.997772	0.238736	0.394855	39	6	0.10554	0.956335	0.378943	0.31442	0.980829	0.793592	0.115703	0.644808	0.0883225	0.911711	0.558215	0.379437	0.407423	0.884219	1.09806	1.13832	1.05856	0.826647	0.0597829	0.904336	0.722343	-0.472491	0.898218	Ywhaz	Not significant
190	IMPC_OFD_047_001-10	Center average speed series	0.234804	0.997771	0.978996	0.94229	39	6	0.466487	0.328628	0.207288	0.783751	0.55223	0.718894	0.47912	0.293428	0.471711	-0.387716	0.121435	0.976797	0.890249	0.599813	1.03999	0.966592	1.11273	0.757516	0.086777	0.88278	0.234975	1.45129	0.499453	A2m	Not significant
191	IMPC_OFD_047_001-15	Center average speed series	0.753604	1	0.997552	0.989722	40	6	0.0879207	0.105008	0.124751	0.358277	0.280595	0.559955	0.0970039	0.713031	0.243991	0.7787	0.230403	0.647363	0.736493	0.799058	1.12814	1.15304	1.10509	0.142146	0.474058	0.461819	0.102709	0.342722	0.372033	A2m	Not significant
192	IMPC_OFD_047_001-20	Center average speed series	0.602717	0.998267	1	0.577211	39	6	0.0324849	0.496896	0.132126	0.203655	0.736309	0.559955	0.0376799	0.842992	0.174841	0.575329	0.114741	1.11372	0.617656	0.584462	1.19729	1.1558	1.23835	0.686578	0.119485	0.872635	0.377625	0.657874	0.615923	A2m	Genotype effect with no sex effect(real)
193	IMPC_OFD_047_001-5	Center average speed series	9.76684e-11	1	0.925449	0.957121	40	6	0.0566363	0.0522153	0.107512	0.281512	0.160587	0.515427	0.679083	0.180402	0.10772	-0.785441	0.110435	1.14624	0.548052	0.584462	1.02108	0.860275	1.16922	0.786468	-0.0846964	0.894597	0.0157299	1.84699	0.134946	A2m	Not significant
1901	IMPC_OFD_047_001-10	Center average speed series	0.661242	0.997888	0.998425	0.964747	39	6	0.0451512	0.0500298	0.088808	0.349425	0.182758	0.86021	0.478619	-0.293795	0.191012	0.629968	0.0679288	-1.21531	0.846283	0.5054	0.957005	1.0793	0.836767	0.751242	0.0877033	0.885537	0.150547	-1.75757	0.608879	Ahcy	Genotype effect with no sex effect(real)
1911	IMPC_OFD_047_001-15	Center average speed series	0.000914363	1	0.984399	0.940182	40	6	0.379982	0.220448	0.395466	0.669612	0.495328	0.903226	0.39323	-0.371099	0.964573	-0.0316657	0.164723	-0.710533	0.992161	0.7111	0.862162	0.839387	0.883244	0.112392	0.436041	0.38566	0.877797	-0.242826	0.987293	Ahcy	Not significant
1921	IMPC_OFD_047_001-20	Center average speed series	0.00262752	0.998267	0.989968	0.798913	39	6	0.923503	0.949525	0.370824	0.98812	0.968093	0.903226	0.925649	-0.0388174	0.11443	0.665688	0.306571	-0.73897	0.846283	0.743946	0.912701	1.16558	0.670754	0.566328	0.16976	0.832836	0.232932	-1.2349	0.769079	Ahcy	Not significant
1931	IMPC_OFD_047_001-5	Center average speed series	5.55422e-11	1	0.916634	0.998178	40	6	0.382555	0.643281	0.72139	0.669612	0.887477	0.959047	0.395785	0.369116	0.254507	0.61785	0.864922	0.120382	0.853444	0.954035	1.02349	1.1247	0.930253	0.831614	-0.0673667	0.925024	0.544924	-0.564836	0.893983	Ahcy	Not significant
1902	IMPC_OFD_047_001-10	Center average speed series	0.24363	1	0.983973	0.942892	40	6	0.0798414	0.59197	0.111452	0.269516	0.794182	0.473411	0.088483	0.730885	0.883941	0.0772784	0.0442381	1.38449	0.930464	0.372531	1.09424	0.998083	1.1906	0.954997	-0.0175856	0.980635	0.061038	1.28963	0.488304	Atp5b	Not significant
1913	IMPC_OFD_047_001-15	Center average speed series	0.0135998	1	0.794746	0.839255	40	6	0.747602	0.307168	0.367073	0.864258	0.613886	0.631321	0.754322	-0.136519	0.493849	0.452074	0.21069	-0.725111	0.652297	0.648275	0.899774	1.06268	0.748973	0.134911	0.443862	0.432306	0.566374	-0.733323	0.794298	Atp5b	Not significant
1922	IMPC_OFD_047_001-20	Center average speed series	0.545787	0.998267	0.983502	0.437743	39	6	0.142211	0.749648	0.489852	0.344753	0.875501	0.681533	0.15377	0.586285	0.117337	0.741053	0.531666	0.434903	0.318202	0.857444	1.12207	1.17514	1.07224	0.667097	0.132005	0.878686	0.812264	-0.174145	0.896291	Atp5b	Not significant
1932	IMPC_OFD_047_001-5	Center average speed series	2.66945e-11	1	0.988199	0.995337	40	6	0.60454	0.775492	0.945431	0.792839	0.899121	0.952093	0.61452	0.219506	0.58147	0.285844	0.834199	0.153168	0.716942	0.971807	0.989848	1.04745	0.936785	0.846182	-0.0641988	0.941323	0.740097	-0.196874	0.883698	Atp5b	Not significant
1903	IMPC_OFD_047_001-10	Center average speed series	0.161648	0.99768	0.622463	0.749843	39	6	0.597185	0.397276	0.215106	0.757504	0.652914	0.580369	0.607544	0.21323	0.287468	-0.515619	0.160917	0.943064	0.497343	0.543094	1.04591	0.938729	1.15198	0.89182	0.0383915	0.949188	0.216877	1.49707	0.594055	Atp6v0d1	Not significant
1915	IMPC_OFD_047_001-15	Center average speed series	0.000482516	1	0.698942	0.665959	40	6	0.803224	0.413807	0.220168	0.917568	0.67422	0.580369	0.808533	-0.105733	0.314952	0.686449	0.100146	-0.897914	0.532611	0.44944	0.897942	1.17411	0.642303	0.115741	0.439458	0.375904	0.444719	-1.14491	0.772261	Atp6v0d1	Not significant
1923	IMPC_OFD_047_001-20	Center average speed series	0.0113597	0.998267	0.956002	0.44235	39	6	0.645741	0.843693	0.338468	0.792501	0.97827	0.615101	0.655054	0.185621	0.0437561	0.887086	0.470954	-0.512418	0.202844	0.794963	0.966075	1.22634	0.717088	0.634337	0.133608	0.861562	0.321032	-1.2659	0.674167	Atp6v0d1	Not significant
1933	IMPC_OFD_047_001-5	Center average speed series	7.99364e-11	1	0.922661	0.998188	40	6	0.410087	0.589388	0.675741	0.56574	0.794729	0.813472	0.423088	0.348353	0.221138	0.660058	0.958719	0.0366488	0.414129	0.979448	1.04112	1.18647	0.907215	0.81825	-0.0727461	0.919269	0.455502	-0.696155	0.772261	Atp6v0d1	Not significant
1904	IMPC_OFD_047_001-10	Center average speed series	0.04572	1	0.640802	0.503897	40	6	0.00718147	0.916164	0.0480406	0.0835248	0.974033	0.332725	0.00893528	1.09713	0.181743	0.778768	0.0254172	1.4155	0.499792	0.336273	1.19257	1.14444	1.2408	0.856693	-0.0529729	0.951542	0.519968	0.583755	0.871691	C8a	One sex_Male only
1917	IMPC_OFD_047_001-15	Center average speed series	0.227189	1	0.991541	0.999613	40	6	0.0145785	0.1208	0.0328681	0.0846965	0.313745	0.270344	0.0175202	1.00411	0.102042	1.06953	0.0805433	0.938699	0.391596	0.402558	1.22492	1.21245	1.23646	0.126759	0.454888	0.362725	0.692993	0.324058	0.916795	C8a	cannot classify
1924	IMPC_OFD_047_001-20	Center average speed series	0.504715	0.998267	1	0.72765	39	6	0.417548	0.600431	0.805053	0.605283	0.802005	0.946823	0.43077	0.326544	0.591648	0.247047	0.564563	0.409223	0.87632	0.750062	1.05781	1.04367	1.07246	0.690559	0.12409	0.885821	0.703211	0.286267	0.916795	C8a	Not significant
1934	IMPC_OFD_047_001-5	Center average speed series	3.76671e-10	1	0.795874	0.967931	40	6	0.140678	0.807141	0.244287	0.289086	0.910466	0.639732	0.151928	0.618054	0.925912	0.0483355	0.0935703	1.18777	0.988219	0.435102	1.18929	1.04797	1.31948	0.795756	-0.0788502	0.913645	0.298219	1.06059	0.735606	C8a	Not significant
1905	IMPC_OFD_047_001-10	Center average speed series	0.166718	1	0.99883	0.977815	40	6	0.345063	0.91581	0.7173	0.548305	0.955148	0.9037	0.358498	0.39873	0.815014	0.11846	0.355298	0.679	0.950231	0.588779	1.0669	1.01767	1.11624	0.882657	-0.042901	0.950613	0.71284	0.517639	0.861349	Cdk4	Not significant
1919	IMPC_OFD_047_001-15	Center average speed series	0.142006	1	0.979852	0.978337	40	6	0.00589548	0.211651	0.157075	0.05367	0.472144	0.638678	0.00740702	1.12225	0.0137387	1.66019	0.244706	0.584308	0.140619	0.567273	1.24432	1.40144	1.09887	0.115675	0.466422	0.349091	0.35553	-0.609455	0.766844	Cdk4	Genotype effect with no sex effect(real)
1925	IMPC_OFD_047_001-20	Center average speed series	0.847688	1	0.767673	0.957552	39	6	0.0109313	0.597542	0.0776614	0.0701269	0.845287	0.533689	0.0133817	1.01407	0.0103606	1.02489	0.169649	1.00726	0.138479	0.508946	1.22815	1.21269	1.24425	0.600084	0.156382	0.877405	0.847669	0.138756	0.950487	Cdk4	Genotype effect with no sex effect(real)
1935	IMPC_OFD_047_001-5	Center average speed series	6.17879e-11	1	0.863544	0.988688	40	6	0.107568	0.8806	0.433572	0.240726	0.940027	0.896279	0.117589	0.673565	0.326176	0.527247	0.244405	0.819883	0.597418	0.567273	1.06788	1.10455	1.03409	0.795487	-0.0811104	0.91225	0.809489	0.211526	0.932789	Cdk4	Not significant
1906	IMPC_OFD_047_001-10	Center average speed series	0.192185	0.997444	0.858485	0.962566	39	6	0.940924	0.812184	0.987836	0.954461	0.954316	0.993118	0.942583	0.0299409	0.795799	0.137172	0.910829	-0.0748865	0.895748	0.935715	1.00505	1.02588	0.98487	0.760734	0.0937365	0.884904	0.897101	-0.118322	0.969282	Dhfr	Not significant
19110	IMPC_OFD_047_001-15	Center average speed series	0.00692635	1	0.986888	0.996542	40	6	0.398322	0.0583427	0.188989	0.502581	0.168745	0.486711	0.411429	-0.357131	0.369112	-0.618903	0.852557	-0.0953585	0.601537	0.922084	0.858821	0.733791	0.974557	0.134479	0.462593	0.388494	0.304232	0.986138	0.935057	Dhfr	Not significant
1926	IMPC_OFD_047_001-20	Center average speed series	0.504263	0.998267	0.772229	0.503904	39	6	0.839836	0.912791	0.875152	0.877162	0.988751	0.92954	0.844284	0.0816865	0.310597	0.404892	0.749626	-0.238533	0.554202	0.880811	1.02521	1.09959	0.95482	0.702345	0.116433	0.857897	0.584043	-0.526993	0.935057	Dhfr	Not significant
1936	IMPC_OFD_047_001-5	Center average speed series	1.1319e-10	1	0.997579	0.985577	40	6	0.265144	0.712311	0.208734	0.394929	0.902572	0.493548	0.278515	-0.46982	0.0130014	-1.20041	0.721124	0.260768	0.127102	0.869046	0.847662	0.750175	0.937473	0.77037	-0.0852365	0.884904	0.278423	1.37594	0.935057	Dhfr	Not significant
1907	IMPC_OFD_047_001-10	Center average speed series	0.325123	0.997538	0.998327	0.900005	39	6	0.0232329	0.0839143	0.0314827	0.126579	0.23638	0.235791	0.0982685	0.676517	0.00211377	1.4949	0.830044	-0.140181	0.0477107	0.982945	1.10945	1.23034	0.990653	0.81348	0.0656643	0.940197	0.146407	-1.56942	0.426714	Dync1li1	One sex_Female only
19111	IMPC_OFD_047_001-15	Center average speed series	0.327231	1	0.982316	0.987435	40	6	0.80621	0.223332	0.39707	0.962091	0.464295	0.771444	0.811442	-0.104096	0.586726	0.389465	0.238253	-0.597657	0.820378	0.905872	0.983834	1.07681	0.897771	0.125204	0.474122	0.388388	0.629199	-0.513001	0.825637	Dync1li1	Not significant
1927	IMPC_OFD_047_001-20	Center average speed series	0.346415	0.998267	0.969255	0.749321	39	6	0.560467	0.829523	0.898189	0.857825	0.918122	0.948479	0.571551	0.234905	0.33195	0.418129	0.940593	0.0544772	0.609291	0.982945	1.06268	1.13441	0.994875	0.718509	0.109091	0.934056	0.798491	-0.254561	0.889099	Dync1li1	Not significant
1937	IMPC_OFD_047_001-5	Center average speed series	8.39077e-09	1	0.859469	0.992504	40	6	0.307448	0.817158	0.773788	0.668883	0.918122	0.916032	0.320947	0.43077	0.333416	0.485983	0.611173	0.375557	0.609291	0.982945	1.0796	1.21502	0.954837	0.850015	-0.0516797	0.950017	0.92118	-0.162106	0.966614	Dync1li1	Not significant
1908	IMPC_OFD_047_001-10	Center average speed series	0.000176135	1	0.951116	0.938696	40	6	0.010714	0.867074	0.0696529	0.0535699	0.954813	0.6782	0.013071	1.04565	0.215365	0.759546	0.0290268	1.33174	0.538411	0.31588	1.26675	1.25121	1.28231	0.922642	-0.0268025	0.951791	0.670401	0.545395	0.995159	G6pd2	Genotype effect with no sex effect(real)
19112	IMPC_OFD_047_001-15	Center average speed series	0.00644132	1	0.978417	0.954729	40	6	0.100213	0.158553	0.171464	0.238574	0.345087	0.893578	0.109903	0.687631	0.209895	0.863665	0.329056	0.511597	0.531926	0.655139	1.21403	1.29921	1.13518	0.117426	0.444721	0.337126	0.944843	0.0926531	0.995159	G6pd2	Not significant
1929	IMPC_OFD_047_001-20	Center average speed series	0.610499	0.998267	0.987066	0.547614	39	6	0.250832	0.838578	0.282177	0.414321	0.954813	0.893578	0.264409	0.460859	0.0201719	1.07814	0.824688	-0.153576	0.124393	0.92465	1.11706	1.28323	0.958594	0.702636	0.111059	0.86246	0.290819	-1.12066	0.817739	G6pd2	Not significant
1938	IMPC_OFD_047_001-5	Center average speed series	6.71091e-10	1	0.627195	0.97399	40	6	0.0160328	0.0412458	0.0223228	0.0760532	0.127175	0.429508	0.0935968	0.720172	0.000946688	1.62176	0.793026	-0.181412	0.039629	0.916936	1.15611	1.48785	0.850482	0.833716	-0.0605659	0.927509	0.0870326	-1.86373	0.458973	G6pd2	One sex_Female only
1909	IMPC_OFD_047_001-10	Center average speed series	0.218696	1	0.932612	0.818851	40	6	0.0148074	0.0211627	0.0110044	0.0895722	0.0628053	0.101241	0.179019	0.58031	0.00454587	1.58726	0.502118	-0.426635	0.0557627	0.817609	1.08867	1.23967	0.937361	0.868812	-0.0477573	0.937371	0.0588307	-2.06165	0.173645	Galc	One sex_Female only
19113	IMPC_OFD_047_001-15	Center average speed series	0.427579	1	0.981763	0.954594	40	6	0.0428481	0.262063	0.0858763	0.158807	0.487066	0.282165	0.0488916	0.840821	0.0259106	1.51774	0.750118	0.163904	0.12031	0.893794	1.18159	1.33553	1.0391	0.11135	0.481175	0.330459	0.283621	-0.872659	0.421972	Galc	Genotype effect with no sex effect(real)
19210	IMPC_OFD_047_001-20	Center average speed series	0.549374	0.998267	0.99993	0.906693	39	6	0.519064	0.66272	0.887711	0.67554	0.823922	0.922818	0.530891	0.26007	0.523963	0.325463	0.770549	0.198224	0.748671	0.893794	1.05288	1.08503	1.02307	0.639371	0.138309	0.826736	0.992208	0.01107	0.992208	Galc	Not significant
1939	IMPC_OFD_047_001-5	Center average speed series	4.34175e-11	1	0.962617	0.983346	40	6	0.334443	0.904141	0.547704	0.517122	0.954247	0.695017	0.347911	0.407635	0.931068	-0.0447727	0.233819	0.860042	0.98784	0.645875	1.01875	0.987544	1.0475	0.794245	-0.0835898	0.891104	0.295789	0.821225	0.436527	Galc	Not significant
19010	IMPC_OFD_047_001-10	Center average speed series	0.0966815	0.997771	0.977121	0.799294	39	6	0.189496	0.829776	0.622422	0.578796	0.927397	0.870403	0.202249	-0.525221	0.23061	-0.537686	0.473956	-0.511411	0.681753	0.908149	0.942446	0.924693	0.960289	0.856614	0.0524543	0.951175	0.944538	0.0787294	0.99722	Gnpda1	Not significant
19114	IMPC_OFD_047_001-15	Center average speed series	0.0833567	1	0.998589	0.999979	40	6	0.477538	0.020496	0.0484629	0.761608	0.109525	0.721984	0.489739	0.300663	0.696779	-0.248909	0.115433	0.850235	0.87167	0.469979	1.07867	0.932652	1.21384	0.099086	0.500251	0.360504	0.0923213	1.5994	0.581283	Gnpda1	Interaction_cannot classify2
19211	IMPC_OFD_047_001-20	Center average speed series	0.733048	0.998267	0.996182	0.838063	39	6	0.739983	0.891251	0.345822	0.866692	0.95431	0.822677	0.747046	0.134087	0.043428	0.84397	0.429354	-0.571897	0.478317	0.884585	1.04318	1.20472	0.889093	0.612128	0.152098	0.866101	0.179864	-1.26377	0.649664	Gnpda1	Not significant
19310	IMPC_OFD_047_001-5	Center average speed series	8.3811e-11	1	0.708832	0.982641	40	6	0.425263	0.480016	0.479186	0.740062	0.753886	0.822677	0.438112	0.337249	0.118325	0.818465	0.839871	-0.143968	0.559225	0.974611	1.01293	1.16408	0.873691	0.803472	-0.0758331	0.926167	0.363814	-1.03827	0.794844	Gnpda1	Not significant
19011	IMPC_OFD_047_001-10	Center average speed series	0.417616	1	0.984674	0.96556	40	6	0.218188	0.842663	0.627811	0.365006	0.969095	0.884978	0.231115	0.51812	0.245028	0.696984	0.605943	0.339256	0.492808	0.737849	1.04998	1.07064	1.02928	0.975315	-0.0100463	0.995215	0.56419	-0.367774	0.942588	Idh1	Not significant
19115	IMPC_OFD_047_001-15	Center average speed series	0.881818	1	0.886957	0.992393	40	6	0.279306	0.410479	0.168508	0.420132	0.67427	0.669368	0.292745	0.45632	0.0517103	1.18541	0.661454	-0.272773	0.197555	0.768833	1.09462	1.22814	0.971029	0.127081	0.424651	0.358697	0.479998	-1.03354	0.937479	Idh1	Not significant
19212	IMPC_OFD_047_001-20	Center average speed series	0.511798	0.998267	0.993468	0.666257	39	6	0.240469	0.798045	0.681708	0.394899	0.943351	0.922643	0.253953	0.470933	0.269603	0.562529	0.572293	0.38183	0.530317	0.716367	1.12218	1.14351	1.10284	0.73503	0.0972252	0.894341	0.944735	-0.0834733	0.988933	Idh1	Not significant
19311	IMPC_OFD_047_001-5	Center average speed series	2.80343e-11	1	0.934845	0.998232	40	6	0.487264	0.59967	0.756598	0.618583	0.838601	0.937055	0.499325	0.294087	0.292835	0.567586	0.976873	0.0205883	0.563628	0.996113	1.00229	1.08813	0.923204	0.811926	-0.0784903	0.913669	0.259421	-0.625488	0.856607	Idh1	Not significant
19012	IMPC_OFD_047_001-10	Center average speed series	0.292161	1	0.90006	0.804572	40	6	0.788064	0.787222	0.7432	0.861436	0.88531	0.855427	0.793764	0.114002	0.567675	-0.326752	0.417954	0.554757	0.881718	0.710586	1.01129	0.960155	1.06254	0.909282	-0.0378794	0.941329	0.0567548	0.843629	0.25717	Iqgap1	Not significant
19116	IMPC_OFD_047_001-15	Center average speed series	0.955607	1	0.68337	0.661154	40	6	0.212377	0.0675798	0.120549	0.496688	0.181464	0.665748	0.225223	-0.524896	0.147613	-0.884545	0.782534	-0.165246	0.436813	0.893444	0.882315	0.804861	0.954012	0.136706	0.419413	0.382776	0.409382	1.13871	0.690237	Iqgap1	Not significant
19213	IMPC_OFD_047_001-20	Center average speed series	0.00462962	0.998267	0.916872	0.424889	39	6	0.944966	0.570563	0.95013	0.958182	0.718286	0.95013	0.946513	-0.027906	0.920855	0.0383855	0.905233	-0.0897718	0.960604	0.958093	0.906572	0.990131	0.827241	0.550594	0.172607	0.778617	0.971744	0.0444492	0.985335	Iqgap1	Not significant
19312	IMPC_OFD_047_001-5	Center average speed series	1.19143e-10	1	0.977702	0.985503	40	6	0.298879	0.813105	0.391835	0.621754	0.886468	0.692068	0.31237	0.438383	0.791202	-0.12801	0.17472	1.00478	0.904611	0.513136	1.05785	0.973361	1.1357	0.792439	-0.0801806	0.901963	0.341903	1.05261	0.65176	Iqgap1	Not significant
19013	IMPC_OFD_047_001-10	Center average speed series	0.593161	1	0.997989	0.999783	40	6	0.933443	0.88666	0.995408	0.940063	0.94666	0.995408	0.935271	0.0354403	0.834089	0.120714	0.942365	-0.0498336	0.940005	0.98394	0.998189	1.002	0.994371	0.945316	-0.0184925	0.985758	0.913152	-0.18904	0.955304	Lmbrd1	Not significant
19117	IMPC_OFD_047_001-15	Center average speed series	0.637196	1	0.998159	0.999077	40	6	0.609141	0.28244	0.244908	0.705068	0.570455	0.473254	0.619027	0.216723	0.198979	0.897722	0.375561	-0.464275	0.738005	0.555518	1.03546	1.162	0.918317	0.129158	0.483041	0.458511	0.256804	-0.878956	0.579881	Lmbrd1	Not significant
19214	IMPC_OFD_047_001-20	Center average speed series	0.717497	0.99819	0.993176	0.88509	39	6	0.285184	0.881838	0.532355	0.487905	0.94666	0.705201	0.298952	0.429329	0.0582569	0.833995	0.968253	0.02853	0.486617	0.985316	1.09566	1.20973	0.987225	0.631107	0.150863	0.923894	0.24966	-0.654602	0.579881	Lmbrd1	Not significant
19313	IMPC_OFD_047_001-5	Center average speed series	4.04441e-11	1	0.946895	0.997036	40	6	0.472476	0.533262	0.67184	0.627024	0.749735	0.784947	0.484748	0.30411	0.230032	0.638301	0.966356	-0.0300813	0.738005	0.985316	1.00703	1.12004	0.902917	0.778593	-0.0905746	0.954188	0.338683	-0.758957	0.649529	Lmbrd1	Not significant
19014	IMPC_OFD_047_001-10	Center average speed series	0.000948266	1	0.989511	0.995077	39	6	0.0471272	0.852983	0.262804	0.239268	0.910162	0.62991	0.0536845	0.801577	0.142225	0.784067	0.217576	0.820418	0.593987	0.634082	1.19368	1.16393	1.22344	0.845708	0.0519004	0.920329	0.951557	0.0882509	0.984958	Mmachc	Genotype effect with no sex effect(real)
19118	IMPC_OFD_047_001-15	Center average speed series	0.62131	1	0.963186	0.954497	40	6	0.892801	0.327156	0.455584	0.923376	0.555063	0.713827	0.895734	0.0571946	0.403512	0.589011	0.370047	-0.474622	0.673076	0.765439	1.04624	1.15886	0.941995	0.15302	0.417419	0.390465	0.638241	-0.646214	0.838497	Mmachc	Not significant
19215	IMPC_OFD_047_001-20	Center average speed series	0.298576	1	0.995292	0.967231	40	6	0.642929	0.725402	0.797826	0.792649	0.851606	0.885822	0.652098	0.196558	0.768231	-0.149696	0.460251	0.542812	0.876942	0.79471	1.08541	1.0016	1.16841	0.97354	0.01003	0.997801	0.575896	0.702537	0.822629	Mmachc	Not significant
19314	IMPC_OFD_047_001-5	Center average speed series	2.97372e-11	1	0.915963	0.997085	40	6	0.523644	0.715636	0.885945	0.753987	0.850874	0.922605	0.535133	0.270104	0.453851	0.406687	0.851211	0.133521	0.699301	0.980508	1.00318	1.07376	0.938161	0.835041	-0.0684498	0.920329	0.598066	-0.341615	0.822629	Mmachc	Not significant
19015	IMPC_OFD_047_001-10	Center average speed series	0.131503	1	0.99685	0.96716	40	6	0.47756	0.971624	0.896032	0.668042	0.977813	0.972687	0.489761	0.300554	0.737483	0.16984	0.559388	0.431268	0.882745	0.74724	1.04802	1.00179	1.09435	0.936664	-0.0239326	0.982768	0.852745	0.237496	0.960818	Mvk	Not significant
19119	IMPC_OFD_047_001-15	Center average speed series	0.025092	1	0.981026	0.9735	40	6	0.257008	0.21688	0.185345	0.456262	0.412856	0.439805	0.270327	0.477793	0.133317	1.04894	0.856393	-0.0933504	0.378122	0.904127	1.12232	1.27433	0.981614	0.106759	0.499145	0.326682	0.487424	-0.643141	0.77013	Mvk	Not significant
19216	IMPC_OFD_047_001-20	Center average speed series	0.0519874	1	0.995827	0.898037	40	6	0.756947	0.771066	0.81428	0.848984	0.916003	0.932292	0.763433	0.131302	0.619716	-0.237817	0.507319	0.500421	0.836881	0.707175	1.07026	0.943552	1.19573	0.96699	-0.0131365	0.987583	0.452895	0.725101	0.74539	Mvk	Not significant
19315	IMPC_OFD_047_001-5	Center average speed series	3.59523e-10	1	0.943835	0.992948	40	6	0.0412776	0.0260481	0.0542482	0.144337	0.083992	0.318261	0.572411	-0.245945	0.139033	0.745589	0.0741489	-1.23748	0.378122	0.344574	0.822875	1.15344	0.518335	0.842507	-0.0597969	0.954841	0.0377687	-2.04286	0.237974	Mvk	Genotype effect with no sex effect(real)
19016	IMPC_OFD_047_001-10	Center average speed series	0.540807	0.997536	0.962598	0.903073	39	6	0.124718	0.628706	0.436529	0.509562	0.804222	0.780295	0.135672	0.612265	0.334312	0.486697	0.270167	0.740461	0.804429	0.894427	1.07316	1.05542	1.09104	0.742379	0.102472	0.869281	0.507606	0.356236	0.764081	Nek2	Not significant
19120	IMPC_OFD_047_001-15	Center average speed series	0.735335	1	0.991346	0.987026	40	6	0.0751805	0.0379211	0.0230317	0.4087	0.12611	0.253349	0.0835503	0.742474	0.720689	0.234226	0.0151999	1.25072	0.93293	0.197599	1.13116	1.03533	1.21986	0.141311	0.447244	0.420862	0.041594	1.46374	0.247831	Nek2	Interaction_One sex_Male only2
19217	IMPC_OFD_047_001-20	Center average speed series	0.758323	0.998267	0.678993	0.705378	39	6	0.985584	0.351163	0.423856	0.99945	0.606339	0.777069	0.985989	-0.00730482	0.215517	-0.556054	0.439635	0.544221	0.672507	0.894427	1.03315	0.884996	1.1765	0.715763	0.108275	0.869281	0.237373	1.20855	0.595513	Nek2	Not significant
19316	IMPC_OFD_047_001-5	Center average speed series	9.05076e-11	1	0.994777	0.961925	40	6	0.683451	0.719815	0.938626	0.888486	0.830109	0.965637	0.691709	-0.172925	0.946822	-0.0311598	0.68085	-0.31469	0.973832	0.894427	0.940454	1.0118	0.874723	0.830938	-0.0655027	0.910708	0.771659	-0.349033	0.897132	Nek2	Not significant
19017	IMPC_OFD_047_001-10	Center average speed series	0.391987	0.997955	0.696567	0.746122	39	6	0.206573	0.905104	0.560913	0.407922	0.960144	0.846232	0.219626	-0.50604	0.651596	-0.239545	0.241692	-0.769957	0.910024	0.677601	0.957629	0.997806	0.918358	0.715001	0.100531	0.883579	0.751234	-0.429881	0.886795	Npc2	Not significant
19121	IMPC_OFD_047_001-15	Center average speed series	0.369637	1	0.948907	0.801524	40	6	0.0137935	0.192336	0.0307916	0.0984354	0.382237	0.2668	0.0166215	-1.01158	0.307665	-0.648152	0.0144675	-1.37501	0.759845	0.108162	0.844164	0.872792	0.817665	0.120459	0.464059	0.366196	0.737112	-0.262804	0.876717	Npc2	One sex_Male only
19218	IMPC_OFD_047_001-20	Center average speed series	0.708411	0.998267	0.961977	0.652102	39	6	0.349364	0.53479	0.692304	0.513684	0.743027	0.846232	0.363088	0.376495	0.623832	0.210334	0.451881	0.545933	0.886205	0.797477	1.09065	1.05294	1.12798	0.681641	0.127755	0.856276	0.521056	0.463354	0.797435	Npc2	Not significant
19317	IMPC_OFD_047_001-5	Center average speed series	4.20258e-11	1	0.998923	0.997327	40	6	0.209418	0.933747	0.596587	0.407922	0.978803	0.846232	0.222221	-0.528252	0.144938	-0.757365	0.678786	-0.299138	0.550766	0.882116	0.854999	0.869233	0.841886	0.792025	-0.0835357	0.918247	0.666298	0.374691	0.859666	Npc2	Not significant
19018	IMPC_OFD_047_001-10	Center average speed series	0.372894	1	0.970857	0.792541	40	6	0.0782392	0.0650917	0.118415	0.156478	0.222758	0.302969	0.538448	-0.267883	0.320504	0.616835	0.0568633	-1.1526	0.589451	0.152597	0.990946	1.1298	0.851803	0.942903	-0.0186952	0.981998	0.283193	-1.78813	0.77878	Pipox	Not significant
19122	IMPC_OFD_047_001-15	Center average speed series	0.271905	1	0.993121	0.941151	40	6	0.00839397	0.00835356	0.00244663	0.030314	0.0367557	0.0470976	0.550329	0.260162	0.0324986	1.4745	0.0553083	-0.95418	0.373202	0.152098	1.04367	1.27903	0.825796	0.102643	0.494239	0.335301	0.0210157	-1.93445	0.415903	Pipox	One sex_Female only
19219	IMPC_OFD_047_001-20	Center average speed series	0.279576	0.998267	0.699464	0.611577	39	6	0.219741	0.781475	0.449198	0.308545	0.898113	0.576471	0.232987	-0.492009	0.852384	-0.0815574	0.209616	-0.897788	0.932597	0.365288	0.868622	0.959182	0.782526	0.486853	0.182211	0.796954	0.674568	-0.634019	0.908603	Pipox	Not significant
19318	IMPC_OFD_047_001-5	Center average speed series	4.73078e-10	1	0.999919	0.999158	40	6	0.00965169	0.553579	0.030547	0.0330302	0.874094	0.15175	0.0118355	-1.05975	0.303556	-0.537251	0.0194402	-1.58225	0.587142	0.0919	0.644772	0.80056	0.501249	0.90848	-0.0327456	0.98196	0.31157	-1.07775	0.802222	Pipox	One sex_Male only
19019	IMPC_OFD_047_001-10	Center average speed series	0.114657	0.997955	0.880267	0.940747	39	6	0.0157709	0.10035	0.0380366	0.0451195	0.255731	0.237243	0.0573414	-0.773986	0.960774	0.0236162	0.0169798	-1.56873	0.97393	0.090219	0.852995	0.994873	0.713409	0.68803	0.111275	0.836644	0.16059	-1.48108	0.903933	Plk1	One sex_Male only
19123	IMPC_OFD_047_001-15	Center average speed series	0.328509	1	0.990379	0.980061	40	6	0.959971	0.0589922	0.29812	0.966086	0.179246	0.490656	0.961072	0.021302	0.863259	-0.115305	0.77267	0.157909	0.96734	0.830488	1.00582	0.966505	1.04221	0.117179	0.493893	0.318058	0.39222	0.767107	0.998034	Plk1	Not significant
19220	IMPC_OFD_047_001-20	Center average speed series	0.590706	0.998267	0.944536	0.815287	39	6	0.667465	0.615107	0.925327	0.727307	0.784254	0.93719	0.676283	0.17351	0.650094	0.243104	0.870417	0.107944	0.863151	0.904776	1.0521	1.08571	1.02088	0.582252	0.157107	0.797318	0.986528	0.0219462	0.998034	Plk1	Not significant
19319	IMPC_OFD_047_001-5	Center average speed series	3.52677e-10	1	0.616424	0.946916	40	6	0.80196	0.654237	0.870274	0.839136	0.789079	0.887118	0.807301	-0.106426	0.738881	0.176389	0.58947	-0.389241	0.904973	0.670045	0.854373	1.05808	0.666701	0.85843	-0.054136	0.928379	0.620908	-0.619766	0.998034	Plk1	Not significant
19020	IMPC_OFD_047_001-10	Center average speed series	0.891661	0.99777	0.955157	0.891457	39	6	0.114585	0.424245	0.186371	0.334331	0.600494	0.621236	0.125139	0.62897	0.806246	0.138066	0.0660909	1.12221	0.89078	0.347242	1.08813	1.01666	1.159	0.736075	0.0912821	0.898261	0.412216	1.07543	0.657792	Pmm2	Not significant
19124	IMPC_OFD_047_001-15	Center average speed series	0.926402	1	0.992227	0.995	40	6	0.605045	0.0669578	0.270682	0.810328	0.154518	0.724401	0.615015	0.2192	0.992318	0.00667749	0.402422	0.431723	0.996837	0.631005	1.05044	1.01202	1.086	0.139756	0.458919	0.359371	0.366664	0.883964	0.632077	Pmm2	Not significant
19221	IMPC_OFD_047_001-20	Center average speed series	0.524263	0.998267	0.999572	0.790231	39	6	0.086004	0.983958	0.237976	0.300014	0.99785	0.724401	0.0951961	0.68287	0.00959329	1.12369	0.729488	0.245297	0.146017	0.863348	1.15784	1.25638	1.06438	0.673774	0.126763	0.866926	0.320745	-0.751634	0.623207	Pmm2	Not significant
19320	IMPC_OFD_047_001-5	Center average speed series	4.40417e-11	1	0.92197	0.998473	40	6	0.270585	0.535188	0.447152	0.550573	0.692054	0.764944	0.283985	0.464578	0.0958876	0.889739	0.955378	0.0394173	0.513916	0.978372	1.05114	1.18255	0.930081	0.83856	-0.0660112	0.936067	0.137192	-0.916333	0.395745	Pmm2	Not significant
19021	IMPC_OFD_047_001-10	Center average speed series	0.394397	1	0.992708	0.956734	40	6	0.916986	0.915648	0.993457	0.974744	0.945238	0.993457	0.919263	-0.0442312	0.795235	-0.151499	0.926455	0.0630368	0.913047	0.965189	1.00531	0.947993	1.06274	0.993357	0.00229135	0.994347	0.896652	0.216827	0.911351	Ptpn12	Not significant
19125	IMPC_OFD_047_001-15	Center average speed series	0.920611	1	0.922621	0.916793	40	6	0.647683	0.298693	0.319133	0.806382	0.56118	0.637491	0.656748	-0.193756	0.499379	0.422242	0.187916	-0.809753	0.707896	0.831891	0.968208	1.07457	0.869755	0.132284	0.456086	0.389616	0.502164	-0.775909	0.778354	Ptpn12	Not significant
19222	IMPC_OFD_047_001-20	Center average speed series	0.757383	0.998267	0.759745	0.751612	39	6	0.963466	0.524139	0.909515	0.979261	0.783051	0.963931	0.964493	0.0185173	0.778794	-0.126878	0.815508	0.167389	0.911042	0.963076	1.00051	0.982166	1.01913	0.658403	0.13559	0.835393	0.642906	0.429857	0.830726	Ptpn12	Not significant
19321	IMPC_OFD_047_001-5	Center average speed series	1.01452e-10	1	0.972917	0.998639	40	6	0.125686	0.66714	0.441082	0.352962	0.824223	0.692331	0.136427	-0.64181	0.388237	-0.479212	0.243128	-0.804407	0.625212	0.837441	0.823233	0.887707	0.763835	0.784831	-0.0804216	0.907941	0.747203	-0.405617	0.854225	Ptpn12	Not significant
19022	IMPC_OFD_047_001-10	Center average speed series	0.314577	0.9978	0.741836	0.786237	39	6	0.118715	0.557406	0.375833	0.253619	0.804445	0.62344	0.129438	-0.622153	0.111125	-0.843262	0.539969	-0.398532	0.432233	0.763033	0.898355	0.852838	0.943558	0.73672	0.0979397	0.879653	0.602403	0.54267	0.809308	Pttg1	Not significant
19126	IMPC_OFD_047_001-15	Center average speed series	0.309891	1	0.980566	0.948831	40	6	0.74336	0.281868	0.339823	0.839652	0.520788	0.614295	0.750184	-0.138894	0.530611	0.459371	0.126616	-0.737159	0.789861	0.333933	0.993965	1.14474	0.854398	0.126256	0.461817	0.323978	0.534809	-0.734713	0.809308	Pttg1	Not significant
19223	IMPC_OFD_047_001-20	Center average speed series	0.586026	0.998267	0.981272	0.91271	39	6	0.929196	0.941122	0.62926	0.949396	0.997731	0.806597	0.931183	0.0359209	0.21658	0.562789	0.49247	-0.487868	0.614607	0.74324	1.01978	1.1583	0.887782	0.69623	0.120074	0.879653	0.273149	-0.930584	0.682873	Pttg1	Not significant
19322	IMPC_OFD_047_001-5	Center average speed series	4.19997e-11	1	0.989117	0.999536	40	6	0.366085	0.516966	0.641907	0.590963	0.785713	0.815396	0.379421	-0.381902	0.841305	-0.10694	0.355126	-0.656863	0.919566	0.603714	0.876475	0.980639	0.780511	0.72207	-0.113101	0.879653	0.453162	-0.663023	0.735876	Pttg1	Not significant
19023	IMPC_OFD_047_001-10	Center average speed series	0.251014	0.997887	0.987448	0.749091	39	6	0.748568	0.418279	0.43829	0.926134	0.695189	0.937495	0.755414	0.129477	0.460824	-0.422853	0.265945	0.683726	0.985589	0.831471	1.02928	0.976438	1.08175	0.787165	0.0748225	0.883472	0.382172	1.1814	0.723397	Rock1	Not significant
19127	IMPC_OFD_047_001-15	Center average speed series	0.552784	1	0.99439	0.98266	40	6	0.414326	0.0989179	0.32991	0.911268	0.259457	0.937495	0.427286	0.345246	0.617451	0.340466	0.516697	0.350026	0.985589	0.831471	1.07264	1.05708	1.08704	0.132631	0.463638	0.369473	0.648419	0.473199	0.882437	Rock1	Not significant
19224	IMPC_OFD_047_001-20	Center average speed series	0.60563	0.998267	0.243243	0.39058	39	6	0.0595777	0.0288693	0.0673203	0.432517	0.0982785	0.85786	0.814507	0.0975639	0.0726278	-0.811002	0.135644	1.0085	0.645581	0.831471	1.00296	0.761657	1.23573	0.737547	0.0925827	0.859058	0.116977	1.91209	0.489455	Rock1	Not significant
19323	IMPC_OFD_047_001-5	Center average speed series	2.61147e-11	1	0.748125	0.935276	40	6	0.69411	0.840274	0.571988	0.926134	0.920848	0.937495	0.70212	-0.166792	0.160711	-0.73055	0.581689	0.396965	0.985589	0.886383	0.929895	0.876137	0.979421	0.787196	-0.0894588	0.883472	0.00720662	1.03806	0.267523	Rock1	Not significant
19024	IMPC_OFD_047_001-10	Center average speed series	0.164819	0.997866	0.781222	0.927955	39	6	0.0049641	0.778402	0.0465371	0.0371002	0.913497	0.319883	0.00632325	-1.08751	0.0271333	-1.06642	0.0929356	-1.10665	0.214052	0.507571	0.874958	0.887614	0.862794	0.792754	0.0762397	0.923152	0.9544	0.0360065	0.9544	Sra1	One sex_Female only
19128	IMPC_OFD_047_001-15	Center average speed series	0.597763	1	0.982715	0.985335	40	6	0.0722904	0.0238355	0.15648	0.209495	0.0995484	0.543176	0.0804849	-0.749695	0.0496329	-1.29312	0.681164	-0.206265	0.273669	0.920629	0.872939	0.778406	0.960445	0.119249	0.46511	0.403175	0.0614767	1.55197	0.301024	Sra1	Not significant
19225	IMPC_OFD_047_001-20	Center average speed series	0.361021	0.998267	0.999997	0.682349	39	6	0.788172	0.856796	0.964075	0.917381	0.947641	0.998903	0.793997	0.108578	0.520112	0.277372	0.937138	-0.0577806	0.789491	0.992346	1.03026	1.08229	0.981324	0.752965	0.0949616	0.90611	0.817058	-0.240191	0.927712	Sra1	Not significant
19324	IMPC_OFD_047_001-5	Center average speed series	3.55364e-11	1	0.958102	0.988526	40	6	0.0288693	0.586617	0.158392	0.117127	0.754564	0.543176	0.0335674	-0.904019	0.108495	-0.785883	0.157135	-1.02216	0.389631	0.62315	0.789409	0.857103	0.727045	0.696561	-0.124393	0.901717	0.297782	-0.360666	0.660703	Sra1	Genotype effect with no sex effect(real)
19025	IMPC_OFD_047_001-10	Center average speed series	1.46122e-05	1	0.93702	0.778929	40	6	0.123023	0.55456	0.259483	0.291611	0.831105	0.58889	0.133666	0.645903	0.0539663	1.10715	0.780613	0.184658	0.321352	0.884234	1.16522	1.29367	1.03651	0.872714	-0.048219	0.959814	0.372705	-0.970709	0.664568	Ulk3	Not significant
19129	IMPC_OFD_047_001-15	Center average speed series	0.898526	1	0.998691	0.995332	40	6	0.969793	0.142383	0.411813	0.97743	0.403387	0.701274	0.970624	0.016073	0.594787	0.366125	0.536226	-0.333978	0.845919	0.740135	0.992995	1.04991	0.940315	0.126747	0.505866	0.415989	0.607379	-0.194237	0.754801	Ulk3	Not significant
19226	IMPC_OFD_047_001-20	Center average speed series	0.0617055	1	0.67769	0.504012	40	6	0.333381	0.391099	0.0464949	0.532681	0.72718	0.425097	0.346852	0.408522	0.0276044	1.22082	0.545773	-0.403772	0.321352	0.740135	1.16569	1.4331	0.900895	0.921695	-0.0298501	0.967025	0.102119	-1.65444	0.367472	Ulk3	Interaction_One sex_Female only2
19325	IMPC_OFD_047_001-5	Center average speed series	1.31792e-10	1	0.824999	0.991671	40	6	0.0761065	0.55422	0.208092	0.208298	0.831105	0.58889	0.0845313	0.74017	0.0151632	1.1518	0.654965	0.328543	0.321352	0.798434	1.08354	1.21633	0.961198	0.834013	-0.0613892	0.959814	0.458825	-0.884643	0.690936	Ulk3	Not significant
161	IMPC_OFD_014_001	Center distance travelled	0.0129052	1	0.999735	0.98299	40	6	0.453655	0.66876	0.856403	0.783751	0.839531	0.925704	0.466175	-0.317102	0.633351	-0.2517	0.596364	-0.382504	0.891625	0.898111	0.803593	0.84234	0.764915	0.7456	-0.105142	0.881164	0.762555	-0.235946	0.881311	A2m	Not significant
1611	IMPC_OFD_014_001	Center distance travelled	0.0183369	1	0.999951	0.999731	40	6	0.109447	0.775199	0.44665	0.372172	0.947536	0.903226	0.119548	-0.670091	0.16877	-0.718886	0.385089	-0.621296	0.846283	0.784907	0.669285	0.621543	0.716941	0.761912	-0.0943427	0.885537	0.997184	0.00324731	0.999483	Ahcy	Not significant
1613	IMPC_OFD_014_001	Center distance travelled	0.0360871	1	0.994026	0.994735	40	6	0.282747	0.889177	0.579478	0.499342	0.937648	0.707759	0.296199	-0.453108	0.107928	-0.82455	0.910495	-0.0816668	0.318202	0.97343	0.83544	0.583106	1.08732	0.848886	-0.0570621	0.941323	0.580254	0.685821	0.795946	Atp5b	Not significant
1615	IMPC_OFD_014_001	Center distance travelled	0.0133929	1	0.959403	0.915293	40	6	0.128759	0.949343	0.424225	0.253495	1	0.678202	0.139611	-0.636774	0.109891	-0.923982	0.602258	-0.349566	0.285716	0.860987	0.718848	0.651722	0.785853	0.763539	-0.0930877	0.885122	0.619987	0.481328	0.819424	Atp6v0d1	Not significant
1617	IMPC_OFD_014_001	Center distance travelled	0.00335601	1	0.940666	0.990023	40	6	0.0430512	0.915299	0.197133	0.140265	0.974033	0.567136	0.0491123	-0.840038	0.0387462	-1.14559	0.431002	-0.534485	0.327136	0.649544	0.54623	0.478256	0.614082	0.730272	-0.110116	0.888855	0.257356	0.500989	0.714244	C8a	Genotype effect with no sex effect(real)
1619	IMPC_OFD_014_001	Center distance travelled	0.0436791	1	0.993955	0.990867	40	6	0.848477	0.570465	0.846569	0.889368	0.831772	0.950342	0.852599	0.081084	0.507387	0.365101	0.773035	-0.202933	0.795158	0.877401	1.04455	1.22258	0.866826	0.784805	-0.0878393	0.91225	0.451462	-0.655873	0.786798	Cdk4	Not significant
16110	IMPC_OFD_014_001	Center distance travelled	0.0103028	1	0.972148	0.932973	40	6	0.0548396	0.883933	0.26512	0.119037	0.98331	0.547721	0.0618498	-0.798982	0.0258747	-1.25026	0.604378	-0.347701	0.181123	0.793181	0.641664	0.499656	0.783417	0.796643	-0.0776316	0.894994	0.409654	0.824931	0.935057	Dhfr	Not significant
16111	IMPC_OFD_014_001	Center distance travelled	0.00700198	1	0.995827	0.992828	40	6	0.571056	0.95562	0.825442	0.857825	0.986849	0.945072	0.581697	-0.240042	0.298565	-0.56003	0.910878	0.0799464	0.604785	0.982945	0.793381	0.621939	0.964516	0.758874	-0.0993861	0.934056	0.496346	0.540591	0.779263	Dync1li1	Not significant
16112	IMPC_OFD_014_001	Center distance travelled	0.0134101	1	0.9998	0.999647	40	6	0.663307	0.940388	0.65192	0.792522	0.961285	0.740452	0.672024	-0.184604	0.208363	-0.688575	0.649693	0.319367	0.416725	0.885672	0.871257	0.636903	1.10519	0.739145	-0.11009	0.860776	0.0698526	0.897851	0.185261	Galc	Not significant
16113	IMPC_OFD_014_001	Center distance travelled	0.0137559	1	0.989015	0.999287	40	6	0.569252	0.898502	0.913612	0.811183	0.95431	0.982615	0.579927	-0.241164	0.464744	-0.422176	0.93009	-0.0601526	0.79964	0.974611	0.818216	0.76071	0.875619	0.795958	-0.0836857	0.926167	0.734235	0.278338	0.954782	Gnpda1	Not significant
16114	IMPC_OFD_014_001	Center distance travelled	0.014121	1	0.99314	0.987303	40	6	0.860788	0.568554	0.879095	0.945283	0.822331	0.9595	0.864582	0.0744274	0.569864	0.312755	0.8161	-0.1639	0.786735	0.913012	0.942935	1.08118	0.804943	0.762072	-0.100559	0.901099	0.28113	-0.577214	0.872384	Idh1	Not significant
16115	IMPC_OFD_014_001	Center distance travelled	0.0159763	1	0.99941	0.98462	40	6	0.052033	0.433325	0.0991358	0.160624	0.670785	0.364058	0.0588296	-0.808054	0.607329	-0.266342	0.0517055	-1.34977	0.8405	0.271933	0.563787	0.797921	0.330074	0.790296	-0.081951	0.954188	0.123253	-1.16537	0.45409	Lmbrd1	Not significant
16116	IMPC_OFD_014_001	Center distance travelled	0.0136495	1	0.963099	0.980025	40	6	0.472586	0.859632	0.875364	0.890767	0.896738	0.968915	0.484856	-0.304035	0.404162	-0.463615	0.837021	-0.144454	0.79705	0.960599	0.798032	0.755724	0.840263	0.775637	-0.0921819	0.879186	0.778281	0.226979	0.868082	Mfap4	Not significant
16117	IMPC_OFD_014_001	Center distance travelled	0.0122727	1	0.996373	0.997267	40	6	0.0054946	0.752357	0.049524	0.0434073	0.900548	0.318261	0.00692743	-1.13085	0.0402995	-1.09323	0.0842139	-1.16847	0.233519	0.369605	0.478708	0.501795	0.455663	0.786227	-0.0803501	0.936963	0.850278	-0.155593	0.960818	Mvk	One sex_Female only
16118	IMPC_OFD_014_001	Center distance travelled	0.0172657	1	0.98289	0.977018	40	6	0.0714142	0.501916	0.202355	0.21829	0.642141	0.511033	0.0795544	-0.751929	0.483599	-0.371488	0.103521	-1.13237	0.922822	0.321575	0.606327	0.769855	0.443092	0.766212	-0.0922652	0.853946	0.297206	-0.853147	0.585639	Pebp1	Not significant
16119	IMPC_OFD_014_001	Center distance travelled	0.0201367	1	0.988256	0.9661	40	6	0.949811	0.682747	0.978157	0.963003	0.865916	0.991743	0.951191	-0.0267171	0.938996	0.0408557	0.895985	-0.09429	0.979239	0.96169	0.979308	1.03907	0.919649	0.756647	-0.0991216	0.87546	0.805047	-0.234267	0.955584	Phyh	Not significant
16120	IMPC_OFD_014_001	Center distance travelled	0.0437322	1	0.998711	0.99243	40	6	0.00279945	0.611789	0.0206072	0.0179632	0.874094	0.122058	0.00364969	-1.20954	0.0767768	-0.93212	0.0263655	-1.48696	0.376207	0.103393	0.412464	0.525013	0.300118	0.801291	-0.072531	0.920232	0.476987	-0.627367	0.82231	Pipox	One sex_Male only
16121	IMPC_OFD_014_001	Center distance travelled	0.0301787	1	0.997069	0.998567	40	6	0.00728089	0.640284	0.0501766	0.02676	0.789079	0.242784	0.00905285	-1.09599	0.0843832	-0.865176	0.0580572	-1.3268	0.317442	0.159102	0.449319	0.505161	0.393578	0.803708	-0.0732345	0.898262	0.546265	-0.534859	0.998034	Plk1	Genotype effect with no sex effect(real)
16122	IMPC_OFD_014_001	Center distance travelled	0.00827064	1	0.90889	0.888867	40	6	0.556601	0.46577	0.659148	0.787642	0.646903	0.829605	0.567511	-0.249077	0.845577	0.106127	0.389379	-0.604282	0.895106	0.631005	0.805126	0.998301	0.612299	0.729264	-0.115271	0.897555	0.0134156	-0.82568	0.150796	Pmm2	Not significant
16123	IMPC_OFD_014_001	Center distance travelled	0.0120799	1	0.919809	0.900509	40	6	0.0431193	0.930521	0.360746	0.20823	0.945775	0.649188	0.0491863	-0.839775	0.0376041	-1.20914	0.471871	-0.470414	0.241331	0.941587	0.583093	0.502204	0.663836	0.810732	-0.0725122	0.919869	0.484059	0.666212	0.778354	Ptpn12	Genotype effect with no sex effect(real)
16124	IMPC_OFD_014_001	Center distance travelled	0.00818003	1	0.998918	0.996221	40	6	0.324412	0.69294	0.769235	0.538143	0.888223	0.888952	0.337901	-0.416088	0.468043	-0.39655	0.537224	-0.435627	0.741506	0.763033	0.738135	0.746922	0.729363	0.741064	-0.107703	0.879653	0.82812	-0.14678	0.93063	Pttg1	Not significant
16125	IMPC_OFD_014_001	Center distance travelled	0.0328776	1	0.984955	0.98669	40	6	0.638176	0.899754	0.790353	0.926134	0.953382	0.937495	0.647449	0.199368	0.740413	-0.17953	0.41599	0.578265	0.985589	0.831471	1.1547	0.961507	1.34755	0.843594	-0.0628295	0.913894	0.455762	0.694965	0.779661	Rock1	Not significant
16126	IMPC_OFD_014_001	Center distance travelled	0.0303018	1	0.973837	0.978883	40	6	0.425592	0.53763	0.649556	0.719454	0.726833	0.886894	0.438438	0.337036	0.226532	0.667384	0.992346	0.00668818	0.544827	0.992346	1.09976	1.26771	0.932099	0.787351	-0.0896924	0.923152	0.0287498	-0.750388	0.254468	Sra1	Not significant
16127	IMPC_OFD_014_001	Center distance travelled	0.00757254	1	0.892944	0.870576	40	6	0.0777079	0.984769	0.289215	0.208298	0.985222	0.58889	0.0862267	-0.736337	0.0707708	-1.06398	0.532678	-0.408693	0.329061	0.740135	0.639785	0.571034	0.708413	0.769329	-0.0909303	0.922109	0.51923	0.564357	0.709537	Ulk3	Not significant
16128	IMPC_OFD_014_001	Center distance travelled	0.026998	1	0.926457	0.881539	40	6	0.128873	0.832009	0.497776	0.36135	0.944264	0.793592	0.139728	-0.636589	0.233486	-0.70132	0.389074	-0.571859	0.616231	0.788389	0.677045	0.686711	0.667397	0.799629	-0.0775196	0.894968	0.961429	0.0519417	0.982031	Ywhaz	Not significant
178	IMPC_OFD_044_001-10	Center distance travelled series	0.152443	1	0.763966	0.733413	40	6	0.78154	0.649646	0.947721	0.92623	0.839531	0.963067	0.787406	-0.117662	0.997447	0.00173352	0.739913	-0.237057	0.997447	0.916153	0.878709	0.955846	0.799362	0.766654	-0.0985824	0.88278	0.544658	-0.337373	0.765339	A2m	Not significant
179	IMPC_OFD_044_001-15	Center distance travelled series	0.000638028	1	0.95012	0.994337	40	6	0.178964	0.947551	0.612605	0.560982	0.983763	0.842528	0.191216	-0.564914	0.277492	-0.56608	0.434706	-0.563747	0.800923	0.843973	0.680212	0.63271	0.726885	0.952137	-0.0191114	0.983665	0.98365	-0.0167792	0.989722	A2m	Not significant
180	IMPC_OFD_044_001-20	Center distance travelled series	0.0788416	1	0.982518	0.987633	40	6	0.362242	0.946031	0.838161	0.724762	0.983763	0.916915	0.375599	-0.384997	0.598097	-0.33822	0.488879	-0.431775	0.891625	0.86649	0.726602	0.75728	0.696456	0.98285	-0.00715022	0.994053	0.813439	-0.100705	0.901977	A2m	Not significant
181	IMPC_OFD_044_001-5	Center distance travelled series	0.0219259	1	0.918276	0.942392	40	6	0.720625	0.527802	0.876401	0.903553	0.761342	0.928165	0.728004	-0.151695	0.972578	0.0163195	0.672893	-0.31971	0.986562	0.912369	0.904174	0.984826	0.824601	0.667361	-0.136292	0.872635	0.631437	-0.472321	0.822372	A2m	Not significant
1781	IMPC_OFD_044_001-10	Center distance travelled series	0.125751	1	0.997864	0.99534	40	6	0.0508671	0.726094	0.266988	0.349425	0.926872	0.86021	0.0575728	-0.811939	0.124207	-0.788446	0.242243	-0.835432	0.846283	0.7111	0.551928	0.514678	0.590246	0.760888	-0.0939654	0.885537	0.87087	-0.140951	0.987293	Ahcy	Not significant
1791	IMPC_OFD_044_001-15	Center distance travelled series	0.00253498	1	0.988771	0.971815	40	6	0.0320603	0.841985	0.178918	0.349425	0.947536	0.86021	0.037091	-0.88766	0.0573211	-1.09529	0.301948	-0.680034	0.831246	0.743946	0.549154	0.453445	0.643194	0.992457	0.00282146	0.995373	0.683909	0.418073	0.958078	Ahcy	Genotype effect with no sex effect(real)
1801	IMPC_OFD_044_001-20	Center distance travelled series	0.178643	1	0.956133	0.983603	40	6	0.123633	0.800938	0.413116	0.394758	0.947536	0.903226	0.134298	-0.645227	0.536892	-0.376014	0.154351	-0.91444	0.896461	0.7111	0.624544	0.72133	0.529437	0.995373	-0.00183253	0.995373	0.499102	-0.540258	0.882178	Ahcy	Not significant
1811	IMPC_OFD_044_001-5	Center distance travelled series	0.022132	1	0.90554	0.927163	40	6	0.756623	0.779307	0.92743	0.918036	0.947536	0.959047	0.763118	0.131482	0.844648	-0.0947343	0.635619	0.357699	0.972949	0.841098	1.02005	0.870107	1.168	0.669704	-0.139096	0.881189	0.681946	0.313337	0.958078	Ahcy	Not significant
1782	IMPC_OFD_044_001-10	Center distance travelled series	0.0579414	0.998267	0.950348	0.930484	39	6	0.140634	0.822969	0.243672	0.344753	0.921714	0.549121	0.152143	-0.588557	0.0115854	-1.13477	0.945653	-0.047725	0.156722	0.979787	0.665828	0.385015	0.966419	0.489191	-0.210007	0.804798	0.227702	0.877041	0.652874	Atp5b	Not significant
1792	IMPC_OFD_044_001-15	Center distance travelled series	0.0051825	1	0.990649	0.995986	40	6	0.383013	0.612569	0.443399	0.600805	0.794182	0.67619	0.39624	-0.368763	0.08799	-0.904715	0.813358	0.167188	0.312853	0.971807	0.964888	0.505074	1.41668	0.986606	0.00477096	0.987966	0.46148	1.07667	0.719585	Atp5b	Not significant
1802	IMPC_OFD_044_001-20	Center distance travelled series	0.0293373	1	0.995054	0.999996	40	6	0.461667	0.568688	0.286104	0.659524	0.791218	0.579451	0.474083	-0.311537	0.0786667	-1.01766	0.551	0.394587	0.312853	0.857444	0.823583	0.361632	1.27752	0.941379	-0.0215308	0.977006	0.28642	1.39072	0.679345	Atp5b	Not significant
1813	IMPC_OFD_044_001-5	Center distance travelled series	0.0144093	1	0.973494	0.98769	40	6	0.895147	0.47479	0.871811	0.952749	0.697557	0.911698	0.898017	-0.0559372	0.80601	0.121723	0.753217	-0.233598	0.896343	0.971807	0.934463	1.161	0.710958	0.625124	-0.157428	0.872959	0.553151	-0.512749	0.794298	Atp5b	Not significant
1783	IMPC_OFD_044_001-10	Center distance travelled series	0.12174	1	0.542325	0.525361	40	6	0.0390083	0.878002	0.215355	0.130548	0.984257	0.580369	0.044709	-0.856248	0.0678605	-1.02774	0.308965	-0.684759	0.233325	0.70117	0.574068	0.533084	0.616226	0.77416	-0.088618	0.891754	0.756126	0.254359	0.910534	Atp6v0d1	Genotype effect with no sex effect(real)
1793	IMPC_OFD_044_001-15	Center distance travelled series	0.0046744	1	0.944352	0.995946	40	6	0.113571	0.724194	0.317221	0.230806	0.888784	0.615101	0.123844	-0.662621	0.0465261	-1.05034	0.696878	-0.274899	0.202844	0.911204	0.685695	0.436768	0.930279	0.999108	-0.000328266	0.999108	0.532278	0.775116	0.79132	Atp6v0d1	Not significant
1803	IMPC_OFD_044_001-20	Center distance travelled series	0.147747	1	0.925269	0.97376	40	6	0.0830453	0.832397	0.335055	0.193772	0.97113	0.615101	0.0918664	-0.723876	0.429182	-0.484949	0.12907	-0.962803	0.600854	0.487884	0.550528	0.592936	0.508855	0.995312	0.00183758	0.999108	0.566423	-0.476016	0.794531	Atp6v0d1	Not significant
1815	IMPC_OFD_044_001-5	Center distance travelled series	0.0346379	1	0.942045	0.968702	40	6	0.518304	0.702053	0.88953	0.694749	0.872947	0.966213	0.529882	0.273571	0.735562	0.166001	0.610515	0.38114	0.837757	0.861099	1.1364	1.1259	1.14676	0.672401	-0.137349	0.867131	0.920059	0.0777901	0.964805	Atp6v0d1	Not significant
1784	IMPC_OFD_044_001-10	Center distance travelled series	0.0234578	0.998267	0.974992	0.927582	39	6	0.0401647	0.615186	0.348914	0.13423	0.811055	0.679687	0.0461088	-0.810555	0.0111496	-1.1721	0.506909	-0.454845	0.173316	0.719734	0.553476	0.452558	0.660898	0.458123	-0.227389	0.747463	0.252461	0.489861	0.714244	C8a	Genotype effect with no sex effect(real)
1794	IMPC_OFD_044_001-15	Center distance travelled series	0.000694545	1	0.829315	0.990121	40	6	0.0860363	0.887312	0.324453	0.2103	0.964694	0.677452	0.0950197	-0.717166	0.0553168	-1.00793	0.547012	-0.4264	0.350316	0.747482	0.618732	0.454603	0.779997	0.909974	-0.0353417	0.956232	0.512113	0.546191	0.871691	C8a	Not significant
1804	IMPC_OFD_044_001-20	Center distance travelled series	0.052338	1	0.958429	0.975433	40	6	0.161105	0.893819	0.545172	0.317123	0.966152	0.809104	0.172938	-0.588544	0.243632	-0.74987	0.485984	-0.427219	0.562458	0.695332	0.55602	0.472603	0.637989	0.990445	-0.00392771	0.991505	0.466344	0.318723	0.871691	C8a	Not significant
1817	IMPC_OFD_044_001-5	Center distance travelled series	0.00537947	1	0.920637	0.817999	40	6	0.00429765	0.800578	0.637223	0.063366	0.910466	0.875482	0.00548471	-1.16027	0.00908789	-1.34312	0.154811	-0.977425	0.154494	0.49578	0.316418	0.293461	0.339068	0.697997	-0.113771	0.888855	0.767898	0.251925	0.928504	C8a	Genotype effect with no sex effect(real)
1785	IMPC_OFD_044_001-10	Center distance travelled series	0.165125	1	0.996925	0.992495	40	6	0.457096	0.532988	0.570509	0.619643	0.805746	0.896279	0.469572	-0.314705	0.826571	0.115911	0.295517	-0.745322	0.950231	0.567273	0.930215	1.13699	0.717512	0.829136	-0.0655385	0.927974	0.433985	-0.926771	0.786798	Cdk4	Not significant
1795	IMPC_OFD_044_001-15	Center distance travelled series	0.00208653	1	0.894967	0.994934	40	6	0.76029	0.933191	0.991357	0.848016	0.955148	0.991357	0.766693	0.12944	0.785666	0.155726	0.881573	0.103155	0.949346	0.945052	0.991028	1.03319	0.9496	0.958304	-0.0171098	0.98752	0.925999	-0.0696807	0.970626	Cdk4	Not significant
1805	IMPC_OFD_044_001-20	Center distance travelled series	0.116971	1	0.974932	0.986661	40	6	0.880538	0.628908	0.614579	0.911986	0.859085	0.896279	0.883802	0.0637848	0.362837	0.585603	0.455382	-0.458034	0.633152	0.683073	1.00733	1.33919	0.681218	0.995421	-0.00186714	0.995421	0.136083	-1.0455	0.483232	Cdk4	Not significant
1819	IMPC_OFD_044_001-5	Center distance travelled series	0.0320236	1	0.978236	0.985389	40	6	0.230813	0.553218	0.602048	0.422752	0.822735	0.896279	0.243895	0.504685	0.211708	0.607457	0.588704	0.401914	0.478405	0.758774	1.30995	1.44578	1.17594	0.658473	-0.142394	0.877405	0.632018	-0.347936	0.83038	Cdk4	Not significant
1786	IMPC_OFD_044_001-10	Center distance travelled series	0.0251399	0.998267	0.999064	0.85311	39	6	0.0250698	0.583483	0.419638	0.0736426	0.822538	0.66186	0.0294508	-0.881027	0.0100015	-1.19035	0.39689	-0.577453	0.127102	0.653796	0.494828	0.413338	0.581478	0.460578	-0.224097	0.737636	0.379437	0.388795	0.935057	Dhfr	Genotype effect with no sex effect(real)
1796	IMPC_OFD_044_001-15	Center distance travelled series	0.00313033	1	0.958345	0.932855	40	6	0.0532908	0.713659	0.320814	0.117867	0.902572	0.591007	0.060184	-0.80394	0.0310639	-1.20584	0.550071	-0.402044	0.193763	0.765985	0.674024	0.408644	0.934774	0.988277	-0.00417738	0.993737	0.540686	0.799616	0.935057	Dhfr	Not significant
1806	IMPC_OFD_044_001-20	Center distance travelled series	0.147842	1	0.92066	0.955947	40	6	0.308563	0.939382	0.781835	0.426389	0.988751	0.868983	0.322063	-0.429789	0.390146	-0.511104	0.601444	-0.348473	0.612126	0.793181	0.775766	0.629847	0.919152	0.998621	0.000528759	0.998621	0.888411	0.16316	0.965441	Dhfr	Not significant
18110	IMPC_OFD_044_001-5	Center distance travelled series	0.00698517	1	0.99846	0.995965	40	6	0.310259	0.732131	0.636117	0.426389	0.911527	0.81911	0.323758	-0.428302	0.15196	-0.739459	0.871675	-0.117145	0.419042	0.92334	0.675422	0.574115	0.775373	0.579512	-0.178973	0.823994	0.544997	0.443341	0.935057	Dhfr	Not significant
1787	IMPC_OFD_044_001-10	Center distance travelled series	0.0989029	1	0.945222	0.914087	40	6	0.396652	0.929614	0.772823	0.803607	0.970988	0.916032	0.409772	-0.358387	0.262182	-0.621243	0.891607	-0.0955313	0.574484	0.982945	0.792777	0.670195	0.918872	0.772929	-0.0938243	0.934056	0.547263	0.431888	0.792119	Dync1li1	Not significant
1797	IMPC_OFD_044_001-15	Center distance travelled series	0.000975051	1	0.980471	0.998324	40	6	0.890952	0.704671	0.693686	0.963379	0.841491	0.898991	0.893935	-0.058189	0.321826	-0.535764	0.553896	0.419386	0.609291	0.982945	0.954782	0.609387	1.29415	0.959146	-0.0163039	0.971935	0.309442	0.938847	0.63094	Dync1li1	Not significant
1807	IMPC_OFD_044_001-20	Center distance travelled series	0.00652405	1	0.924653	0.994303	40	6	0.58909	0.654202	0.516151	0.857825	0.826455	0.807444	0.599381	-0.228916	0.188549	-0.787932	0.613718	0.330099	0.531977	0.982945	0.982347	0.520179	1.43649	0.95274	-0.0179025	0.971922	0.363927	1.10013	0.669644	Dync1li1	Not significant
18111	IMPC_OFD_044_001-5	Center distance travelled series	0.00563612	1	0.999961	0.974313	40	6	0.0220263	0.414278	0.0756763	0.124291	0.719296	0.360844	0.0259463	-0.944946	0.235631	-0.570927	0.0655856	-1.31897	0.555278	0.481078	0.429774	0.662885	0.19978	0.65504	-0.134998	0.912648	0.285296	-0.883036	0.605289	Dync1li1	Genotype effect with no sex effect(real)
1788	IMPC_OFD_044_001-10	Center distance travelled series	0.130606	1	0.532303	0.515999	40	6	0.0865747	0.889883	0.376664	0.220606	0.961227	0.924852	0.0955869	-0.715977	0.125597	-0.870358	0.40687	-0.561597	0.407638	0.705032	0.626267	0.60974	0.643267	0.796919	-0.0798535	0.897795	0.801233	0.228907	0.995159	G6pd2	Not significant
1798	IMPC_OFD_044_001-15	Center distance travelled series	0.00096926	1	0.774483	0.926598	40	6	0.279536	0.811724	0.658086	0.449689	0.954813	0.963115	0.292977	-0.456104	0.736076	-0.199049	0.285071	-0.713159	0.895882	0.655139	0.752811	0.96029	0.548954	0.997402	-0.00102507	0.997402	0.587917	-0.515134	0.967767	G6pd2	Not significant
1808	IMPC_OFD_044_001-20	Center distance travelled series	0.13476	1	0.874013	0.946374	40	6	0.162349	0.854547	0.523551	0.326519	0.954813	0.926707	0.174214	-0.586839	0.542526	-0.377111	0.210735	-0.796566	0.776583	0.625827	0.711399	0.753238	0.670287	0.994067	0.00230856	0.997402	0.672531	-0.417146	0.995159	G6pd2	Not significant
18112	IMPC_OFD_044_001-5	Center distance travelled series	0.0150207	1	0.964296	0.938023	40	6	0.767258	0.548617	0.90801	0.881631	0.789384	0.986655	0.773485	-0.125568	0.985426	0.00852184	0.733754	-0.259658	0.996195	0.891362	0.932364	0.941803	0.923051	0.664348	-0.136182	0.860003	0.703893	-0.404362	0.995159	G6pd2	Not significant
1789	IMPC_OFD_044_001-10	Center distance travelled series	0.0601304	0.998267	0.625551	0.83522	39	6	0.571548	0.85442	0.407939	0.730312	0.954247	0.625507	0.58242	-0.228321	0.0544078	-0.864008	0.570387	0.401709	0.222468	0.835601	0.831107	0.554238	1.12714	0.483516	-0.22065	0.741392	0.0477632	1.04507	0.158921	Galc	Not significant
1799	IMPC_OFD_044_001-15	Center distance travelled series	0.00140737	1	0.94213	0.998535	40	6	0.695394	0.880707	0.900617	0.822841	0.954247	0.930974	0.703373	0.166061	0.856273	-0.103213	0.529044	0.435335	0.947444	0.835601	0.983148	0.851241	1.11275	0.934316	-0.0273437	0.965809	0.35275	0.511204	0.492773	Galc	Not significant
1809	IMPC_OFD_044_001-20	Center distance travelled series	0.172196	1	0.948145	0.957165	40	6	0.424122	0.777226	0.680884	0.586756	0.922643	0.762576	0.436983	-0.3381	0.264865	-0.709891	0.956925	0.033691	0.49971	0.972786	0.813992	0.619548	1.00506	0.95992	-0.0161309	0.97583	0.376258	0.727451	0.513845	Galc	Not significant
18113	IMPC_OFD_044_001-5	Center distance travelled series	0.0105261	1	0.925186	0.978129	40	6	0.778922	0.92824	0.625162	0.879274	0.954247	0.727091	0.784855	-0.119108	0.175856	-0.661601	0.569488	0.423385	0.380678	0.835601	0.836995	0.505577	1.16398	0.609013	-0.167267	0.826736	0.155623	0.917718	0.28479	Galc	Not significant
17810	IMPC_OFD_044_001-10	Center distance travelled series	0.187293	1	0.919081	0.947334	40	6	0.489923	0.807798	0.533261	0.761608	0.917536	0.828978	0.501945	-0.29231	0.155426	-0.830651	0.712811	0.246031	0.612713	0.971718	0.846436	0.603498	1.09633	0.825568	-0.0709073	0.926167	0.189338	1.00577	0.649664	Gnpda1	Not significant
17910	IMPC_OFD_044_001-15	Center distance travelled series	0.000746625	1	0.944147	0.995874	40	6	0.66844	0.88408	0.972534	0.845041	0.95431	0.989581	0.677042	-0.181615	0.83901	-0.113792	0.72224	-0.249438	0.933421	0.971718	0.808799	0.844429	0.77379	0.941964	-0.0239873	0.976307	0.809854	-0.159633	0.958318	Gnpda1	Not significant
18010	IMPC_OFD_044_001-20	Center distance travelled series	0.0501957	1	0.970481	0.969756	40	6	0.506919	0.985388	0.930899	0.772788	0.994635	0.982615	0.51868	-0.281023	0.686381	-0.255103	0.629693	-0.306944	0.87167	0.960512	0.796611	0.809265	0.784176	0.970597	0.011998	0.976307	0.95838	-0.039843	0.99722	Gnpda1	Not significant
18114	IMPC_OFD_044_001-5	Center distance travelled series	0.00903983	1	0.924217	0.9844	40	6	0.693087	0.56447	0.917019	0.845041	0.828054	0.982615	0.701121	-0.167383	0.652153	-0.22647	0.883751	-0.108297	0.870785	0.974611	0.808057	0.858953	0.757841	0.58088	-0.179861	0.834711	0.935993	-0.0616885	0.99722	Gnpda1	Not significant
17811	IMPC_OFD_044_001-10	Center distance travelled series	0.0633302	1	0.802303	0.80328	40	6	0.408719	0.763593	0.855279	0.541931	0.943351	0.9595	0.421733	-0.349379	0.505447	-0.364701	0.636905	-0.334057	0.739682	0.750039	0.742154	0.742068	0.742243	0.787599	-0.0899458	0.913669	0.875979	-0.0593012	0.988933	Idh1	Not significant
17911	IMPC_OFD_044_001-15	Center distance travelled series	0.0061094	1	0.962435	0.998177	40	6	0.854058	0.796836	0.912064	0.943681	0.943351	0.969675	0.858031	-0.0780642	0.709537	0.199548	0.620533	-0.355677	0.882978	0.750039	0.954689	1.06166	0.849583	0.997058	-0.00115792	0.999727	0.600308	-0.556383	0.942588	Idh1	Not significant
18011	IMPC_OFD_044_001-20	Center distance travelled series	0.113248	1	0.981087	0.991125	40	6	0.928086	0.738521	0.857723	0.971505	0.937555	0.9595	0.93006	0.0383083	0.560292	0.377786	0.625108	-0.301169	0.783533	0.750039	0.97652	1.22414	0.733196	0.983342	-0.00682231	0.995215	0.346732	-0.685778	0.926439	Idh1	Not significant
18115	IMPC_OFD_044_001-5	Center distance travelled series	0.0422991	1	0.981985	0.993548	40	6	0.358886	0.437508	0.541501	0.50188	0.67427	0.884758	0.372261	0.387672	0.135298	0.734922	0.956221	0.0404222	0.331758	0.987209	1.19475	1.47555	0.917705	0.68998	-0.130669	0.881361	0.126853	-0.825168	0.759901	Idh1	Not significant
17812	IMPC_OFD_044_001-10	Center distance travelled series	0.0683334	1	0.979602	0.987908	40	6	0.00560743	0.624712	0.0377896	0.0655462	0.838046	0.364058	0.00706258	-1.12837	0.0996361	-0.858796	0.0401901	-1.39795	0.653684	0.243502	0.433217	0.569021	0.293522	0.814549	-0.0693545	0.954188	0.453681	-0.608511	0.774577	Lmbrd1	One sex_Male only
17912	IMPC_OFD_044_001-15	Center distance travelled series	0.000480682	1	0.858159	0.992354	40	6	0.109402	0.857319	0.422136	0.292388	0.938272	0.642076	0.119502	-0.670173	0.375907	-0.480711	0.218978	-0.859634	0.738005	0.431244	0.617462	0.686337	0.549788	0.995025	-0.0019689	0.995025	0.633879	-0.380892	0.851454	Lmbrd1	Not significant
18012	IMPC_OFD_044_001-20	Center distance travelled series	0.0280096	1	0.99962	0.98923	40	6	0.0174838	0.564338	0.0438307	0.121262	0.770539	0.364058	0.0208269	-0.978519	0.484856	-0.410878	0.0134068	-1.54616	0.798775	0.211529	0.426386	0.65992	0.196905	0.957712	-0.0164224	0.985758	0.00601336	-1.1517	0.216802	Lmbrd1	One sex_Male only
18116	IMPC_OFD_044_001-5	Center distance travelled series	0.0158476	1	0.991394	0.962089	40	6	0.496865	0.218666	0.116631	0.647292	0.501904	0.364058	0.508783	-0.287676	0.269519	0.51642	0.132652	-1.09177	0.738005	0.349991	0.833995	1.40345	0.272157	0.655666	-0.139053	0.92938	0.0294144	-1.74725	0.228741	Lmbrd1	Not significant
17813	IMPC_OFD_044_001-10	Center distance travelled series	0.035788	0.998267	0.994025	0.768137	39	6	0.014113	0.551474	0.089161	0.154047	0.766066	0.628726	0.0170577	-0.959939	0.0223782	-1.04995	0.198369	-0.874866	0.281592	0.634082	0.480498	0.457626	0.504161	0.516337	-0.192469	0.734787	0.977359	-0.0173872	0.984958	Mmachc	Genotype effect with no sex effect(real)
17913	IMPC_OFD_044_001-15	Center distance travelled series	0.00105142	1	0.894245	0.995257	40	6	0.0556463	0.758886	0.218751	0.247135	0.857575	0.62991	0.0627165	-0.796444	0.389987	-0.465641	0.102349	-1.12725	0.673076	0.565499	0.521157	0.640854	0.403548	0.996377	-0.00141612	0.998041	0.386327	-0.663022	0.775924	Mmachc	Not significant
18013	IMPC_OFD_044_001-20	Center distance travelled series	0.0410093	1	0.982319	0.987537	40	6	0.23563	0.960948	0.694781	0.487398	0.973847	0.840688	0.248763	-0.49959	0.512716	-0.419189	0.35032	-0.579991	0.751652	0.75569	0.571013	0.608511	0.534165	0.983264	0.00697523	0.997801	0.599266	-0.153826	0.822629	Mmachc	Not significant
[truncated: 3,553 more rows]

## Sheet: summary_KO phenotype
SI Data 6b. Summary of Genotype Effect and Genotype-Sex Interaction Effect on IMPC Phenotype Data of 30 KO lines (for Figure 3b).
[truncated: 41 more rows]

## Sheet: classification_exclude weight
SI Data 6c. Genotype Effect and Genotype-Sex Interaction Effect on IMPC Phenotype Data of 30 KO lines after excluding bodyweight.
[truncated: 4,340 more rows]

## Sheet: significant_exclude weight
SI Data 6d. Significant Genotype Effect and Genotype-Sex Interaction Effect on IMPC Phenotype Data of 30 KO lines after excluding bodyweight.
[truncated: 1,015 more rows]
