# Supplementary material for: Sexual Dimorphism of the Mouse Plasma Metabolome Is Associated with Phenotypes of 30 Gene Knockout Lines
Source: Metabolites. 2023 Aug 15;13(8):947. doi: 10.3390/metabo13080947 (PMC10456929; doi:10.3390/metabo13080947)
Supplement: Supplementary file 1 [file metabolites-13-00947-s001.zip › Supplementary Data S7_Metabolite-phenotype correlation.xlsx_Zhang et al_KOMP_08-2023.xlsx]

## Sheet: read_me
Sexual Dimorphism of the Mouse Plasma Metabolome Is Associated with Phenotypes of 30 Gene Knockout Lines
Ying Zhang 1,2, Dinesh K. Barupal 3, Sili Fan 1, Bei Gao 4, Chao Zhu 5, Ann M. Flenniken 6,7, Colin McKerlie 6,8, Lauryl M. J. Nutter 6,8, Kevin C. Kent Lloyd 9 and Oliver Fiehn 1,*
1	West Coast Metabolomics Center, University of California Davis, Davis, CA 95616, USA; ofiehn@ucdavis.edu (O.F.) ythzhang@ucdavis.edu (Y.Z.); slfan@ucdavis.edu (S.F.)
2	Department of Chemistry, University of California, Davis, Davis, CA 95616, USA
3	Department of Environmental Medicine and Public Health, Icahn School of Medicine at Mount Sinai, New York, NY 10029, USA; dinesh.barupal@mssm.edu
4	School of Marine Sciences, Nanjing University of Information Science and Technology,Nanjing 210044, China; wintergb2012@gmail.com
5	College of Medicine & Nursing, Dezhou University, Dezhou 253023, China; zhuchao@dzu.edu.cn
6	The Centre for Phenogenomics, Toronto, ON M5T 3H7, Canada; flenniken@lunenfeld.ca (A.M.F.); colin.mckerlie@sickkids.ca (C.M.); lauryl.nutter@sickkids.ca (L.M.J.N.)
7	Lunenfeld-Tanenbaum Research Institute, Mount Sinai Hospital, Toronto, ON M5G 1X5, Canada
8	The Hospital for Sick Children, Toronto, ON M5G 1X8, Canada
9	Department of Surgery, School of Medicine, and Mouse Biology Program, University of California, Davis, Davis, CA 95616, USA; kclloyd@ucdavis.edu
	*Correspondence: ofiehn@ucdavis.edu
	Legend for each datasheet
Table SI7a	significant results	include all significant spearman correlation results
Table SI7b	sampel size>14	only include significant correlations where number of metabolomics data and phenotype data are greater than 14
Table SI7c	Tranformed correlation results	Merged (pvalues and foldchange) and tansformed data for spearman correlation analysis using ChemRICH: https://chemrich.idsl.me/run-chemrich/for-multiple-conditions
		foldchange represents Exponential tranformed correlation coefficients of metabolite-phenotype correlations
Table SI7d	Phenotype abbreviation	Abbreviations used for phenotype in heatmap figures: Figure 7& Figure SI5
Table SI7e	Cluster abbreviation	Abbreviations used for metabolite cluster in heatmap figures: Figure 7& Figure SI5

## Sheet: significant results
	Metabolite_label	Assay	Metabolite_class	Metabolites	InChiKeys	Pubchem_ID	SMILES	Corr_coeff_both	Corr_coeff_f	Corr_coeff_m	Corr_pval_both	Corr_pval_f	Corr_pval_m	Phenotype_label	Procedure_name	Phenotype_name	Pheno_label	Metabo_count_female	Metabo_count_male	Pheno_current_count_female	Pheno_current_count_male	classify	class	pheno	Order
7871	ONLI_1170	Oxylipins	Hydroxyeicosapentaenoic acids	5S-HEPE	FTAGQROYQYQRHF-FCWZHQICSA-N	6439678	CC/C=C\C/C=C\C/C=C\C/C=C\C=C\C(CCCC(=O)O)O	-0.116264	0.80403	-0.845154	0.705248	0.0292914	0.0341094	IMPC_ABR_004_001___1 point	Auditory Brain Stem Response	6kHz-evoked ABR Threshold	IMPC_ABR_004_001	17	14	8	8	significant	Different direction	IMPC_ABR_004_001	_003_52
31924	ONLI_0381	CSHPOS	Phosphosphingolipids	SMd41:1	SXZWBNWTCVLZJN-NMIJJABPSA-N	46891684	CCCCCCCCCCCCCCCCCCCCCCC(=O)N[C@@H](COP(=O)([O-])OCC[N+](C)(C)C)[C@@H](/C=C/CCCCCCCCCCCCC)O	-0.097561	-0.750376	0.520301	0.547957	0.000210385	0.0201482	IMPC_HWT_012_001___1 point	Heart Weight	Heart weight normalised against body weight	IMPC_HWT_012_001	20	20	20	20	significant	Different direction	IMPC_HWT_012_001	_00119_86
61228	ONLI_0793	HILICPOS	Proline and derivatives	3-Hydroxyproline	BJBUEDPLEOHJGE-BKLSDQPFSA-N	150779	C1CN[C@@H](C1O)C(=O)O	0.243041	-0.721053	0.573148	0.135997	0.000718586	0.008249	IMPC_GRS_008_001___1 point	Grip Strength	Forelimb grip strength measurement mean	IMPC_GRS_008_001	20	20	19	20	significant	Different direction	IMPC_GRS_008_001	_0093_135
13442	ONLI_0182	CSHPOS	Triacylglycerols	TAG 56:0; TAG 16:0-18:0-22:0;	CAPRXGZRZWSDGE-UWGNJQTFSA-N	131755012	CCCCCCCCCCCCCCCCCCCCCC(=O)OC[C@H](COC(=O)CCCCCCCCCCCCCCC)OC(=O)CCCCCCCCCCCCCCCCC	0.140927	-0.705263	0.737397	0.385735	0.000732211	0.000207306	IMPC_OFD_017_001___1 point	Open Field	Center average speed	IMPC_OFD_017_001	20	20	20	20	significant	Different direction	IMPC_OFD_017_001	_00164_17
13938	ONLI_0187	CSHPOS	Triacylglycerols	TAG 60:2; TAG 18:1-20:1-22:0;	CFOWRVBCJCEHTO-NYLLBKPFSA-N	131757450	CCCCCCCCCCCCCCCCCCCCCC(=O)OC[C@@H](COC(=O)CCCCCCCCC/C=C\CCCCCC)OC(=O)CCCCCCCCC/C=C\CCCCCCCC	0.114042	-0.721362	0.628292	0.495399	0.00104779	0.00301057	IMPC_OFD_017_001___1 point	Open Field	Center average speed	IMPC_OFD_017_001	18	20	20	20	significant	Different direction	IMPC_OFD_017_001	_00164_19
30815	ONLI_0368	CSHPOS	Alkyldiacylglycerols	TAG 52:0; TAG 16:0-18:0-18:0;	CEEXXJUVQPNYKF-IONAWPRUSA-N	131755032	CCCCCCCCCCCCCCCCCCOC[C@H](COC(=O)CCCCCCCCCCCCCCC)OC(=O)CCCCCCCCCCCCCCCCC	-0.168759	-0.685388	0.47988	0.304421	0.00120062	0.0322518	IMPC_GRS_002_001___1	Grip Strength	Forelimb and hindlimb grip strength measurement	IMPC_GRS_002_001.1	20	20	19	20	significant	Different direction	IMPC_GRS_002_001.1	_0089_43
2036	ONLI_0257	CSHPOS	Cholesteryl esters	CE ( 22:4)	ITGTXSFLBABXQA-BMURBKCOSA-N	16061341	CCCCC/C=C\C/C=C\C/C=C\C/C=C\CCCCCC(=O)O[C@H]1CC[C@@]2([C@H]3CC[C@]4([C@H]([C@@H]3CC=C2C1)CC[C@@H]4[C@H](C)CCCC(C)C)C)C	0.1752	0.787882	-0.486189	0.354432	0.0013813	0.0478354	IMPC_BWT_008_001___14	Body Weight	Body weight curve	IMPC_BWT_008_001.14	20	20	13	17	significant	Different direction	IMPC_BWT_008_001.14	_0028_62
2037	ONLI_0257	CSHPOS	Cholesteryl esters	CE ( 22:4)	ITGTXSFLBABXQA-BMURBKCOSA-N	16061341	CCCCC/C=C\C/C=C\C/C=C\C/C=C\CCCCCC(=O)O[C@H]1CC[C@@]2([C@H]3CC[C@]4([C@H]([C@@H]3CC=C2C1)CC[C@@H]4[C@H](C)CCCC(C)C)C)C	0.0548442	0.712289	-0.660714	0.769498	0.00196198	0.00904309	IMPC_BWT_008_001___16	Body Weight	Body weight curve	IMPC_BWT_008_001.16	20	20	16	15	significant	Different direction	IMPC_BWT_008_001.16	_0030_55
16215	ONLI_0211	CSHPOS	1-(1Z-alkenyl),2-acyl-glycerophosphocholines	PC 38:5e; PC 18:1e/20:4; [M+H]+	FHHVIBPVBBRLOR-IYACIECVSA-N	24779390	CCCCCCCCCCCCCCCC/C=C\OC[C@H](COP(=O)([O-])OCC[N+](C)(C)C)OC(=O)CCC/C=C\C/C=C\C/C=C\C/C=C\CCCCC	-0.279657	-0.655639	0.492666	0.0805198	0.00219322	0.0273182	IMPC_CBC_017_001___1 point	Clinical Chemistry	Triglycerides	IMPC_CBC_017_001	20	20	20	20	significant	Different direction	IMPC_CBC_017_001	_0057_62
66730	ONLI_0871	HILICPOS	Arginine and derivatives	N,N-Dimethylarginine	YDGMGEXADBMOMJ-LURJTMIESA-N	123831	CN(C)C(=NCCC[C@@H](C(=O)O)N)N	0.180599	0.651989	-0.640446	0.29186	0.00248678	0.00561171	IMPC_HEM_006_001___1 point	Hematology	Mean corpuscular hemoglobin	IMPC_HEM_006_001	20	20	19	17	significant	Different direction	IMPC_HEM_006_001	_00102_147
55110	ONLI_0675	CSHNEG	Phosphatidylcholines	PC 40:4	UAVRPIXHIHJERN-CBTSKTMBSA-N	24779048	CCCCCCCCCCCCCCCCCCCC(=O)OC[C@H](COP(=O)([O-])OCC[N+](C)(C)C)OC(=O)CCC/C=C\C/C=C\C/C=C\C/C=C\CCCCC	0.358912	0.646617	-0.475188	0.0235117	0.00262115	0.0357808	IMPC_ACS_034_001___1 point	Acoustic Startle and Pre-pulse Inhibition (PPI)	% Pre-pulse inhibition - PPI2	IMPC_ACS_034_001	20	20	20	20	significant	Different direction	IMPC_ACS_034_001	_0019_82
6004	ONLI_0770	HILICPOS	Dipeptides	Ser-Tyr	MALNXHYEPCSPPU-UHFFFAOYSA-N	4575735	C1=CC(=CC=C1CC(C(=O)O)NC(=O)C(CO)N)O	0.215254	-0.832831	0.672505	0.33603	0.00277789	0.0165693	IMPC_BWT_008_001___12	Body Weight	Body weight curve	IMPC_BWT_008_001.12	20	20	10	12	significant	Different direction	IMPC_BWT_008_001.12	_0026_168
65632	ONLI_0854	HILICPOS	Glutamic acid and derivatives	Glutamic acid	WHUUTDBJXJRKMK-VKHMYHEASA-N	33032	C(CC(=O)O)[C@@H](C(=O)O)N	0.165136	0.630158	-0.51095	0.335809	0.00382837	0.0360782	IMPC_HEM_036_001___1 point	Hematology	Eosinophil cell count	IMPC_HEM_036_001	20	20	19	17	significant	Different direction	IMPC_HEM_036_001	_00114_89
6266	ONLI_0814	HILICPOS	Monoalkylamines	Putrescine	KIDHWZJUCRJVML-UHFFFAOYSA-N	1045	C(CCN)CN	0.0924362	0.609481	-0.484758	0.570513	0.0043331	0.0302937	IMPC_CBC_001_001___1 point	Clinical Chemistry	Sodium	IMPC_CBC_001_001	20	20	20	20	significant	Different direction	IMPC_CBC_001_001	_0041_130
18833	ONLI_0239	CSHPOS	Triacylglycerols	TAG 58:1; TAG 18:0-18:1-22:0;	HTEKPEUBHXJJTE-VIQUSSKHSA-N	131755932	CCCCCCCCCCCCCCCCCCCCCC(=O)OC[C@H](COC(=O)CCCCCCCCCCCCCCCCC)OC(=O)CCCCCCCCC/C=C\CCCCCC	0.235831	-0.666667	0.635817	0.159968	0.00442481	0.00258557	IMPC_OFD_017_001___1 point	Open Field	Center average speed	IMPC_OFD_017_001	17	20	20	20	significant	Different direction	IMPC_OFD_017_001	_00164_43
56916	ONLI_0717	HILICPOS	Dipeptides	Arg-Gly	XUUXCWCKKCZEAW-UHFFFAOYSA-N	5074903	C(CC(C(=O)NCC(=O)O)N)CN=C(N)N	0.0397318	0.613222	-0.597421	0.818039	0.00523808	0.0113272	IMPC_HEM_006_001___1 point	Hematology	Mean corpuscular hemoglobin	IMPC_HEM_006_001	20	20	19	17	significant	Different direction	IMPC_HEM_006_001	_00102_114
19414	ONLI_0246	CSHPOS	Triacylglycerols	TAG 54:4; TAG 16:0-18:0-20:4;	IBSUTTNKAUSOHR-WPQPACDXSA-N	131750342	CCCCCCCCCCCCCCCCCC(=O)O[C@@H](COC(=O)CCCCCCCCCCCCCCC)COC(=O)CCC/C=C\C/C=C\C/C=C\C/C=C\CCCCC	-0.0621013	-0.607519	0.46015	0.702584	0.00535194	0.0427264	IMPC_OFD_003_001___10	Open Field	Periphery distance travelled series	IMPC_OFD_003_001.10	20	20	20	20	significant	Different direction	IMPC_OFD_003_001.10	_00138_44
65631	ONLI_0854	HILICPOS	Glutamic acid and derivatives	Glutamic acid	WHUUTDBJXJRKMK-VKHMYHEASA-N	33032	C(CC(=O)O)[C@@H](C(=O)O)N	0.0418716	0.609698	-0.591873	0.808416	0.00557911	0.0123162	IMPC_HEM_035_001___1 point	Hematology	Eosinophil differential count	IMPC_HEM_035_001	20	20	19	17	significant	Different direction	IMPC_HEM_035_001	_00113_82
76018	ONLI_1135	Oxylipins	Long-chain fatty acids	9,12,13-TriHOME	MDIUMSLCYIJBQC-MVFSOIOZSA-N	9858729	CCCCC[C@@H]([C@H](/C=C/[C@H](CCCCCCCC(=O)O)O)O)O	0.0956046	0.609039	-0.48909	0.56262	0.0056448	0.028634	IMPC_OFD_006_001___20	Open Field	Number of Rears	IMPC_OFD_006_001.20	19	20	20	20	significant	Different direction	IMPC_OFD_006_001.20	_00152_103
29529	ONLI_0354	CSHPOS	1,2-aminoalcohols	Heptadecasphing-4-enine	RBEJCQPPFCKTRZ-LHMZYYNSSA-N	5283557	CCCCCCCCCCCC/C=C/[C@H]([C@H](CO)N)O	-0.222166	-0.603779	0.490148	0.192815	0.00619255	0.0457845	IMPC_HEM_036_001___1 point	Hematology	Eosinophil cell count	IMPC_HEM_036_001	20	20	19	17	significant	Different direction	IMPC_HEM_036_001	_00114_46
28437	ONLI_0343	CSHPOS	Phosphosphingolipids	SMd42:1	QEDPUVGSSDPBMD-XTAIVQBESA-O	5283595	CCCCCCCCCCCCCCCCCCCCCCCC(=O)N[C@@H](COP(=O)(O)OCC[N+](C)(C)C)[C@@H](/C=C/CCCCCCCCCCCCC)O	0.37423	-0.644608	0.572755	0.0274519	0.0063958	0.01455	IMPC_HWT_999_999___1 point	Heart Weight	Heart weight normalised against tibia length	IMPC_HWT_999_999	20	20	17	18	significant	Different direction	IMPC_HWT_999_999	_00120_70
2368	ONLI_0028	gctof	Nucleoside and nucleotide analogues	pseudo uridine	PTJWIQPHWPFNBW-GBNDHIKLSA-N	15047	C1=C(C(=O)NC(=O)N1)[C@H]2[C@@H]([C@@H]([C@H](O2)CO)O)O	-0.0996977	-0.610222	0.575439	0.557144	0.00715861	0.0112553	IMPC_DXA_003_001___1 point	Body Composition (DEXA lean/fat)	Lean mass	IMPC_DXA_003_001	20	20	18	19	significant	Different direction	IMPC_DXA_003_001	_0063_5
21431	ONLI_0268	CSHPOS	Triacylglycerols	TAG 58:2; TAG 18:0-18:2-22:0;	VTHDNMHRPKXWMZ-WMMWWMJFSA-N	131756084	CCCCCCCCCCCCCCCCCCCCCC(=O)OC[C@H](COC(=O)CCCCCCCCCCCCCCCCC)OC(=O)CCCCCCC/C=C\C/C=C\CCCCC	0.117534	-0.603509	0.585403	0.476097	0.00730263	0.00669339	IMPC_OFD_017_001___1 point	Open Field	Center average speed	IMPC_OFD_017_001	19	20	20	20	significant	Different direction	IMPC_OFD_017_001	_00164_57
58745	ONLI_0750	HILICPOS	Dipeptides	Lys-Val	YQAIUOWPSUOINN-UHFFFAOYSA-N	140709	CC(C)C(C(=O)O)NC(=O)C(CCCCN)N	-0.0553471	0.584962	-0.497744	0.733711	0.00778272	0.0270715	IMPC_OFD_018_001___1 point	Open Field	Latency to center entry	IMPC_OFD_018_001	20	20	20	20	significant	Different direction	IMPC_OFD_018_001	_00165_94
27438	ONLI_0333	CSHPOS	Triacylglycerols	TAG 56:1; TAG 16:0-18:1-22:0;	OZXLEWFIONDQJM-SKYDHSLNSA-N	131755163	CCCCCCCCCCCCCCCCCCCCCC(=O)OC[C@H](COC(=O)CCCCCCCCCCCCCCC)OC(=O)CCCCCCCCC/C=C\CCCCCC	0.107585	-0.611971	0.578631	0.520281	0.00818501	0.00752009	IMPC_OFD_017_001___1 point	Open Field	Center average speed	IMPC_OFD_017_001	18	20	20	20	significant	Different direction	IMPC_OFD_017_001	_00164_78
31912	ONLI_0381	CSHPOS	Phosphosphingolipids	SMd41:1	SXZWBNWTCVLZJN-NMIJJABPSA-N	46891684	CCCCCCCCCCCCCCCCCCCCCCC(=O)N[C@@H](COP(=O)([O-])OCC[N+](C)(C)C)[C@@H](/C=C/CCCCCCCCCCCCC)O	-0.0812044	-0.600929	0.517544	0.632804	0.00835185	0.0248934	IMPC_DXA_008_001___1 point	Body Composition (DEXA lean/fat)	Lean/Body weight	IMPC_DXA_008_001	20	20	18	19	significant	Different direction	IMPC_DXA_008_001	_0068_70
872	ONLI_0103	gctof	Medium-chain fatty acids	capric acid	GHVNFZFCNZKVNT-UHFFFAOYSA-N	2969	CCCCCCCCCC(=O)O	0.0732166	0.567387	-0.455058	0.653445	0.00907594	0.0437956	IMPC_ACS_003_001___1 point	Acoustic Startle and Pre-pulse Inhibition (PPI)	Response amplitude - PP2	IMPC_ACS_003_001	20	20	20	20	significant	Different direction	IMPC_ACS_003_001	_0010_24
23523	ONLI_0290	CSHPOS	Phosphosphingolipids	SMd33:1	LQINJRUGTUOHGS-YPDYIYJKSA-N	52931139	CCCCCCCCCCCCCCC(=O)N[C@@H](COP(=O)([O-])OCC[N+](C)(C)C)[C@@H](/C=C/CCCCCCCCCCCCC)O	-0.350154	0.580334	-0.529736	0.0362979	0.00918763	0.0287395	IMPC_HEM_030_001___1 point	Hematology	Neutrophil cell count	IMPC_HEM_030_001	20	20	19	17	significant	Different direction	IMPC_HEM_030_001	_00108_95
28435	ONLI_0343	CSHPOS	Phosphosphingolipids	SMd42:1	QEDPUVGSSDPBMD-XTAIVQBESA-O	5283595	CCCCCCCCCCCCCCCCCCCCCCCC(=O)N[C@@H](COP(=O)(O)OCC[N+](C)(C)C)[C@@H](/C=C/CCCCCCCCCCCCC)O	0.357186	-0.563679	0.548326	0.0236586	0.0096431	0.0123061	IMPC_HWT_008_001___1 point	Heart Weight	Heart weight	IMPC_HWT_008_001	20	20	20	20	significant	Different direction	IMPC_HWT_008_001	_00118_66
7107	ONLI_0008	gctof	Pyrimidones	uracil	ISAKRJDGNUQOIC-UHFFFAOYSA-N	1174	C1=CNC(=O)NC1=O	-0.0436374	0.562829	-0.514114	0.78919	0.00977701	0.0203953	IMPC_CBC_001_001___1 point	Clinical Chemistry	Sodium	IMPC_CBC_001_001	20	20	20	20	significant	Different direction	IMPC_CBC_001_001	_0041_2
7244	ONLI_1021	HILICNEG	L-alpha-amino acids	N-epsilon-Acetyllysine	DTERQYGMUDWYAZ-ZETCQYMHSA-N	92832	CC(=O)NCCCC[C@@H](C(=O)O)N	0.0552632	0.569925	-0.65614	0.737538	0.00985866	0.00291815	IMPC_ACS_033_001___1 point	Acoustic Startle and Pre-pulse Inhibition (PPI)	% Pre-pulse inhibition - PPI1	IMPC_ACS_033_001	20	19	20	20	significant	Different direction	IMPC_ACS_033_001	_0018_99
26322	ONLI_0322	CSHPOS	Triacylglycerols	TAG 54:4; TAG 16:1-18:0-20:3;	IJAGVFPXKMAQRV-PGYKOVLESA-N	131759314	CCCCCCCCCCCCCCCCCC(=O)O[C@@H](COC(=O)CCCCCCC/C=C\CCCCCC)COC(=O)CCC/C=C\C/C=C\C/C=C\CCCCCCCC	-0.0273921	-0.566917	0.55188	0.866581	0.0103238	0.0129274	IMPC_OFD_010_001___1 point	Open Field	Periphery distance travelled	IMPC_OFD_010_001	20	20	20	20	significant	Different direction	IMPC_OFD_010_001	_00157_76
20650	ONLI_0260	CSHPOS	Triacylglycerols	TAG 60:3; TAG 18:2-20:1-22:0;	LEZBCWXJJZZACU-NYUYSZTLSA-N	25240389	CCCCCCCCCCCCCCCCCCCCCC(=O)OC[C@@H](COC(=O)CCCCCCC/C=C\C/C=C\CCCCC)OC(=O)CCCCCCCCC/C=C\CCCCCCCC	0.0909738	0.674043	-0.518864	0.626459	0.011524	0.0273582	IMPC_XRY_033_001___1 point	X-ray	Tibia length	IMPC_XRY_033_001	16	20	17	18	significant	Different direction	IMPC_XRY_033_001	_00205_18
44921	ONLI_0551	CSHNEG	Phytoceramides	Cer-NP t42:0; Cer-NP t18:0/24:0;	ZESJDNWGTANZCC-UHYFRKBVSA-N	129678169	[2H]CCCCCCCCCCCCCCCCCCCCCCCC(=O)N[C@@H](CO)[C@@H]([C@@H](CCCCCCCCCCCCCC)O)O	0.0100228	0.566038	-0.517293	0.951712	0.0115269	0.0209784	IMPC_GRS_001_001___1	Grip Strength	Forelimb grip strength measurement	IMPC_GRS_001_001.1	20	20	19	20	significant	Different direction	IMPC_GRS_001_001.1	_0086_58
46211	ONLI_0567	CSHNEG	1-alkyl,2-acylglycerophosphoethanolamines	PE 38:4e; PE 18:0e/20:4;	LRBBGQHIVCMVRY-PQNGYSQDSA-N	52925027	CCCCCCCCCCCCCCCCCCOC[C@H](COP(=O)(O)OCCN)OC(=O)CCC/C=C\C/C=C\C/C=C\C/C=C\CCCCC	-0.155405	0.55175	-0.662655	0.338296	0.011666	0.00145318	IMPC_CBC_010_001___1 point	Clinical Chemistry	Phosphorus	IMPC_CBC_010_001	20	20	20	20	significant	Different direction	IMPC_CBC_010_001	_0050_101
6204	ONLI_0808	HILICPOS	Hydroxyindoles	N-Acetyl-5-hydroxytryptamine	MVAWJSIDNICKHF-UHFFFAOYSA-N	903	CC(=O)NCCC1=CNC2=C1C=C(C=C2)O	0.0035603	-0.642857	0.669053	0.985103	0.0116708	0.00637996	IMPC_BWT_008_001___10	Body Weight	Body weight curve	IMPC_BWT_008_001.10	19	17	16	18	significant	Different direction	IMPC_BWT_008_001.10	_0024_223
74913	ONLI_1103	BileAcid_Steroids	Taurinated bile acids and derivatives	Taurochenodeoxycholic acid	BHTRKEVKTKCXOH-BJLOMENOSA-N	387316	C[C@H](CCC(=O)NCCS(=O)(=O)O)[C@H]1CC[C@@H]2[C@@]1(CC[C@H]3[C@H]2[C@@H](C[C@H]4[C@@]3(CC[C@H](C4)O)C)O)C	0.0335422	-0.593971	0.554456	0.857835	0.0119345	0.0396244	IMPC_HEM_003_001___1 point	Hematology	Hemoglobin	IMPC_HEM_003_001	18	16	19	17	significant	Different direction	IMPC_HEM_003_001	_0099_94
7248	ONLI_1021	HILICNEG	L-alpha-amino acids	N-epsilon-Acetyllysine	DTERQYGMUDWYAZ-ZETCQYMHSA-N	92832	CC(=O)NCCCC[C@@H](C(=O)O)N	-0.0578947	0.556391	-0.698246	0.725497	0.0120956	0.00122872	IMPC_ACS_037_001___1 point	Acoustic Startle and Pre-pulse Inhibition (PPI)	% Pre-pulse inhibition - Global	IMPC_ACS_037_001	20	19	20	20	significant	Different direction	IMPC_ACS_037_001	_0022_90
3995	ONLI_0476	CSHNEG	Long-chain fatty acids	FA 15:0	WQEPLUUGTLDZJY-UHFFFAOYSA-N	13849	CCCCCCCCCCCCCCC(=O)O	0.0597589	0.553383	-0.533835	0.714148	0.0126451	0.0167341	IMPC_CBC_016_001___1 point	Clinical Chemistry	HDL-cholesterol	IMPC_CBC_016_001	20	20	20	20	significant	Different direction	IMPC_CBC_016_001	_0055_153
7241	ONLI_1021	HILICNEG	L-alpha-amino acids	N-epsilon-Acetyllysine	DTERQYGMUDWYAZ-ZETCQYMHSA-N	92832	CC(=O)NCCCC[C@@H](C(=O)O)N	-0.0403887	-0.55188	0.608772	0.807137	0.0129274	0.00670683	IMPC_ACS_007_001___1 point	Acoustic Startle and Pre-pulse Inhibition (PPI)	Response amplitude - PP1_S	IMPC_ACS_007_001	20	19	20	20	significant	Different direction	IMPC_ACS_007_001	_0014_69
3328	ONLI_0394	CSHPOS	1-(1Z-alkenyl),2-acyl-glycerophosphocholines	PCo-40:5	UWNFEVACEPZILS-RNNLSGHUSA-N	52924022	CCCCCCCCCCCCCCCCCC/C=C\OC[C@H](COP(=O)([O-])OCC[N+](C)(C)C)OC(=O)CCC/C=C\C/C=C\C/C=C\C/C=C\CCCCC	0.106191	0.55188	-0.505263	0.512957	0.0129274	0.0245795	IMPC_ACS_036_001___1 point	Acoustic Startle and Pre-pulse Inhibition (PPI)	% Pre-pulse inhibition - PPI4	IMPC_ACS_036_001	20	20	20	20	significant	Different direction	IMPC_ACS_036_001	_0021_17
3329	ONLI_0394	CSHPOS	1-(1Z-alkenyl),2-acyl-glycerophosphocholines	PCo-40:5	UWNFEVACEPZILS-RNNLSGHUSA-N	52924022	CCCCCCCCCCCCCCCCCC/C=C\OC[C@H](COP(=O)([O-])OCC[N+](C)(C)C)OC(=O)CCC/C=C\C/C=C\C/C=C\C/C=C\CCCCC	0.169794	0.548872	-0.490226	0.293759	0.0135073	0.0297617	IMPC_ACS_037_001___1 point	Acoustic Startle and Pre-pulse Inhibition (PPI)	% Pre-pulse inhibition - Global	IMPC_ACS_037_001	20	20	20	20	significant	Different direction	IMPC_ACS_037_001	_0022_30
73316	ONLI_1051	HILICNEG	Pyrimidine 2'-deoxyribonucleosides	Thymidine	IQFYYKKMVGJFEH-XLPZGREQSA-N	5789	CC1=CN(C(=O)NC1=O)[C@H]2C[C@@H]([C@H](O2)CO)O	0.0804834	0.542169	-0.526877	0.626218	0.0135284	0.0204596	IMPC_ECG_007_001___1 point	Electrocardiogram (ECG)	QRS	IMPC_ECG_007_001	20	19	20	20	significant	Different direction	IMPC_ECG_007_001	_0077_66
21130	ONLI_0265	CSHPOS	1-acyl-sn-glycero-3-phosphoethanolamines	LPE20:4	ROPRRXYVXLDXQO-XSQXPFHXSA-N	42607465	CCCCC/C=C\C/C=C\C/C=C\C/C=C\CCCC(=O)OC[C@H](COP(=O)(O)OCCN)O	-0.0156874	0.608824	-0.469504	0.92873	0.0141963	0.0425483	IMPC_IPG_002_001___60	Intraperitoneal glucose tolerance test (IPGTT)	Blood glucose concentration	IMPC_IPG_002_001.60	20	20	16	19	significant	Different direction	IMPC_IPG_002_001.60	_00126_33
6971	ONLI_0924	HILICNEG	Medium-chain hydroxy acids and derivatives	3-Hydroxyoctanoic acid	NDPLAKGOSZHTPH-UHFFFAOYSA-N	26613	CCCCCC(CC(=O)O)O	-0.0406944	-0.537044	0.524561	0.805705	0.0146189	0.022753	IMPC_ACS_007_001___1 point	Acoustic Startle and Pre-pulse Inhibition (PPI)	Response amplitude - PP1_S	IMPC_ACS_007_001	20	19	20	20	significant	Different direction	IMPC_ACS_007_001	_0014_55
5814	ONLI_0742	HILICPOS	Oligopeptides	L-Cysteine-glutathione disulfide	BNRXZEPOHPEEAS-PPSBICQBSA-N	53477713	C(CC(=O)N[C@@H](CSSCC(C(=O)O)N)C(=O)NCC(=O)O)[C@@H](C(=O)O)N	0.187486	-0.605882	0.514197	0.288336	0.0147693	0.0290284	IMPC_BWT_008_001___5	Body Weight	Body weight curve	IMPC_BWT_008_001.5	20	20	16	18	significant	Different direction	IMPC_BWT_008_001.5	_0032_220
78629	ONLI_1168	Oxylipins	Hydroxyeicosapentaenoic acids	12S-HEPE	MCRJLMXYVFDXLS-QGQBRVLBSA-N	10041593	CC/C=C\C/C=C\CC(/C=C/C=C\C/C=C\CCCC(=O)O)O	-0.09606	0.538346	-0.490226	0.554159	0.0157066	0.0297617	IMPC_OFD_003_001___15	Open Field	Periphery distance travelled series	IMPC_OFD_003_001.15	20	20	20	20	significant	Different direction	IMPC_OFD_003_001.15	_00139_189
56414	ONLI_0708	HILICPOS	Fatty alcohols	4-Hydroxynonenal	JVJFIQYAHPMBBX-FNORWQNLSA-N	5283344	CCCCCC(/C=C/C=O)O	-0.00890959	-0.541466	0.544361	0.95707	0.01665	0.0144169	IMPC_GRS_002_001___3	Grip Strength	Forelimb and hindlimb grip strength measurement	IMPC_GRS_002_001.3	20	20	19	20	significant	Different direction	IMPC_GRS_002_001.3	_0091_108
2039	ONLI_0257	CSHPOS	Cholesteryl esters	CE ( 22:4)	ITGTXSFLBABXQA-BMURBKCOSA-N	16061341	CCCCC/C=C\C/C=C\C/C=C\C/C=C\CCCCCC(=O)O[C@H]1CC[C@@]2([C@H]3CC[C@]4([C@H]([C@@H]3CC=C2C1)CC[C@@H]4[C@H](C)CCCC(C)C)C)C	-0.00812325	0.578431	-0.609907	0.963496	0.0168034	0.00845052	IMPC_BWT_008_001___6	Body Weight	Body weight curve	IMPC_BWT_008_001.6	20	20	17	18	significant	Different direction	IMPC_BWT_008_001.6	_0033_62
39334	ONLI_0457	CSHPOS	1-(1Z-alkenyl),2-acylglycerophosphoethanolamines	PEo-38:5/or PEp-38:4	ZTZQZGHJLWFLFQ-VZBWJDOASA-N	53480855	CCCCCCCCCCCCCCCC/C=C\OC[C@H](COP(=O)(O)OCCN)OC(=O)CCCCCC/C=C\C/C=C\C/C=C\C/C=C\CC	-0.0512605	0.578431	-0.473684	0.769361	0.0168034	0.0488745	IMPC_HWT_999_999___1 point	Heart Weight	Heart weight normalised against tibia length	IMPC_HWT_999_999	20	20	17	18	significant	Different direction	IMPC_HWT_999_999	_00120_107
5232	ONLI_0643	CSHNEG	Phosphatidylcholines	PC 37:1; PC 19:0-18:1;	WMCPHMOQTITNBG-KXTYCBLYSA-N	52922955	CCCCCCCCCCCCCCCCCCC(=O)OC[C@H](COP(=O)([O-])OCC[N+](C)(C)C)OC(=O)CCCCCCC/C=C\CCCCCCCC	0.142186	-0.527507	0.590892	0.38146	0.0168358	0.00607929	IMPC_ACS_002_001___1 point	Acoustic Startle and Pre-pulse Inhibition (PPI)	Response amplitude - PP1	IMPC_ACS_002_001	20	20	20	20	significant	Different direction	IMPC_ACS_002_001	_009_113
16329	ONLI_0212	CSHPOS	Triacylglycerols	TAG 56:2; TAG 16:0-18:1-22:1;	JBTULCCTZFQLPM-JSPVYFJMSA-N	131755171	CCCCCCCCCCCCCCCC(=O)OC[C@@H](COC(=O)CCCCCCCCCCC/C=C\CCCCCCCC)OC(=O)CCCCCCCCC/C=C\CCCCCC	0.0650216	-0.532331	0.463507	0.690177	0.0170885	0.0395566	IMPC_OFD_017_001___1 point	Open Field	Center average speed	IMPC_OFD_017_001	20	20	20	20	significant	Different direction	IMPC_OFD_017_001	_00164_33
12430	ONLI_0171	CSHPOS	Alkyldiacylglycerols	TAG 49:0; TAG 15:0-16:0-18:0;	AYHAGPSMXXZJSI-VCZQVZGSSA-N	131754177	CCCCCCCCCCCCCCCCCCOC[C@H](COC(=O)CCCCCCCCCCCCCC)OC(=O)CCCCCCCCCCCCCCC	0.0655845	-0.530827	0.536494	0.68763	0.0174489	0.0147401	IMPC_OFD_017_001___1 point	Open Field	Center average speed	IMPC_OFD_017_001	20	20	20	20	significant	Different direction	IMPC_OFD_017_001	_00164_14
28631	ONLI_0345	CSHPOS	Triacylglycerols	SMd34:0	ANBFFIILUQJIQL-XFGXVVNZSA-N	9544103	CCCCCCCCCCCCCCCCC(=O)OC[C@H](COC(=O)CCCCCCC/C=C\CCCCCCCC)OC(=O)CCCCCCC/C=C\CCCCCCCC	0.0244546	-0.54386	0.647059	0.887419	0.0176169	0.00614735	IMPC_HEM_008_001___1 point	Hematology	Platelet count	IMPC_HEM_008_001	20	20	19	17	significant	Different direction	IMPC_HEM_008_001	_00104_39
23109	ONLI_0028	gctof	Nucleoside and nucleotide analogues	pseudo uridine	PTJWIQPHWPFNBW-GBNDHIKLSA-N	15047	C1=C(C(=O)NC(=O)N1)[C@H]2[C@@H]([C@@H]([C@H](O2)CO)O)O	0.00779431	-0.542105	0.542309	0.96244	0.0180412	0.0134996	IMPC_GRS_008_001___1 point	Grip Strength	Forelimb grip strength measurement mean	IMPC_GRS_008_001	20	20	19	20	significant	Different direction	IMPC_GRS_008_001	_0093_10
20340	ONLI_0257	CSHPOS	Cholesteryl esters	CE ( 22:4)	ITGTXSFLBABXQA-BMURBKCOSA-N	16061341	CCCCC/C=C\C/C=C\C/C=C\C/C=C\CCCCCC(=O)O[C@H]1CC[C@@]2([C@H]3CC[C@]4([C@H]([C@@H]3CC=C2C1)CC[C@@H]4[C@H](C)CCCC(C)C)C)C	0.0368528	0.581738	-0.477364	0.833529	0.0180833	0.0387498	IMPC_IPG_001_001___1 point	Intraperitoneal glucose tolerance test (IPGTT)	Body Weight	IMPC_IPG_001_001	20	20	16	19	significant	Different direction	IMPC_IPG_001_001	_00121_47
68721	ONLI_0897	HILICPOS	Indolyl carboxylic acids and derivatives	Tryptophan	QIVBCDIJIAJPQS-VIFPVBQESA-N	6305	C1=CC=C2C(=C1)C(=CN2)C[C@@H](C(=O)O)N	-0.273611	0.540351	-0.542309	0.0919041	0.0184736	0.0134996	IMPC_GRS_008_001___1 point	Grip Strength	Forelimb grip strength measurement mean	IMPC_GRS_008_001	20	20	19	20	significant	Different direction	IMPC_GRS_008_001	_0093_160
8813	ONLI_0104	gctof	Beta amino acids and derivatives	beta-alanine	UCMIRNVEIXFBKS-UHFFFAOYSA-N	239	C(CN)C(=O)O	0.0294559	0.526316	-0.514286	0.856597	0.0185674	0.021836	IMPC_OFD_001_001___15	Open Field	Whole arena resting time series	IMPC_OFD_001_001.15	20	20	20	20	significant	Different direction	IMPC_OFD_001_001.15	_00131_10
10435	ONLI_0124	gctof	Short-chain hydroxy acids and derivatives	2-hydroxyglutaric acid	HWXBTNAVRSUOJR-VKHMYHEASA-N	439939	C(CC(=O)O)[C@@H](C(=O)O)O	-0.0144472	-0.526316	0.454135	0.929496	0.0185674	0.0457847	IMPC_OFD_047_001___5	Open Field	Center average speed series	IMPC_OFD_047_001.5	20	20	20	20	significant	Different direction	IMPC_OFD_047_001.5	_00193_8
6688	ONLI_0872	HILICPOS	Carboximidic acids	N8-Acetylspermidine	FONIWJIDLJEJTL-UHFFFAOYSA-N	123689	CC(=O)NCCCCNCCCN	0.0347342	-0.545173	0.591228	0.838284	0.0192916	0.00886209	IMPC_DXA_008_001___1 point	Body Composition (DEXA lean/fat)	Lean/Body weight	IMPC_DXA_008_001	20	20	18	19	significant	Different direction	IMPC_DXA_008_001	_0068_144
1598	ONLI_0208	CSHPOS	Triacylglycerols	TAG 46:2; TAG 12:0-16:0-18:2;	0	NA	0	-0.123336	0.530523	-0.547368	0.45444	0.0194486	0.0138052	IMPC_CBC_003_001___1 point	Clinical Chemistry	Chloride	IMPC_CBC_003_001	19	20	20	20	significant	Different direction	IMPC_CBC_003_001	_0043_18
78819	ONLI_1171	Oxylipins	Very long-chain fatty acids	17-HDoHE	SWTYBBUBEPPYCX-VIIQGJSXSA-N	6439179	CC/C=C\CC(/C=C/C=C\C/C=C\C/C=C\C/C=C\CCC(=O)O)O	0.152843	-0.544234	0.605898	0.395789	0.0195429	0.0166632	IMPC_HWT_008_001___1 point	Heart Weight	Heart weight	IMPC_HWT_008_001	18	15	20	20	significant	Different direction	IMPC_HWT_008_001	_00118_192
67519	ONLI_0880	HILICPOS	Proline and derivatives	N-Methylproline	CWLQUGTUXBXTLF-YFKPBYRVSA-N	643474	CN1CCC[C@H]1C(=O)O	-0.153122	0.529521	-0.608485	0.372616	0.0197226	0.00954344	IMPC_HEM_006_001___1 point	Hematology	Mean corpuscular hemoglobin	IMPC_HEM_006_001	20	20	19	17	significant	Different direction	IMPC_HEM_006_001	_00102_149
24435	ONLI_0301	CSHPOS	Triacylglycerols	TAG 52:3; TAG 16:0-18:0-18:3;	QRLNWUKVSNTXQG-VWMLCLGZSA-N	131755026	CCCCCCCCCCCCCCCCCC(=O)O[C@@H](COC(=O)CCCCCCCCCCCCCCC)COC(=O)CCCCCCC/C=C\C/C=C\C/C=C\CC	0.0679302	-0.518797	0.583898	0.677054	0.0205599	0.00687034	IMPC_OFD_017_001___1 point	Open Field	Center average speed	IMPC_OFD_017_001	20	20	20	20	significant	Different direction	IMPC_OFD_017_001	_00164_69
28423	ONLI_0343	CSHPOS	Phosphosphingolipids	SMd42:1	QEDPUVGSSDPBMD-XTAIVQBESA-O	5283595	CCCCCCCCCCCCCCCCCCCCCCCC(=O)N[C@@H](COP(=O)(O)OCC[N+](C)(C)C)[C@@H](/C=C/CCCCCCCCCCCCC)O	0.0201992	0.511296	-0.465487	0.901543	0.0212155	0.0386103	IMPC_ECG_005_001___1 point	Electrocardiogram (ECG)	PQ	IMPC_ECG_005_001	20	20	20	20	significant	Different direction	IMPC_ECG_005_001	_0075_55
51519	ONLI_0631	CSHNEG	Phosphatidylcholines	PC 38:6e; PC 18:2e/20:4;	ZZSZQATYGVHNLZ-PUMLCSCDSA-N	24778979	CCCCC/C=C\C/C=C\CCCCCCCC(=O)OC[C@H](COP(=O)([O-])OCC[N+](C)(C)C)OC(=O)CCC/C=C\C/C=C\C/C=C\C/C=C\CCCCC	0.0242026	0.515789	-0.464662	0.882051	0.0214037	0.04054	IMPC_OFD_001_001___15	Open Field	Whole arena resting time series	IMPC_OFD_001_001.15	20	20	20	20	significant	Different direction	IMPC_OFD_001_001.15	_00131_57
31728	ONLI_0379	CSHPOS	Phosphatidylcholines	PC38:5 A	SUACBSWYGWBPFC-GPUJSUHJSA-N	52923235	CCCCC/C=C\C/C=C\CCCCCCCC(=O)O[C@H](COC(=O)CCCCCC/C=C\C/C=C\C/C=C\CCCCC)COP(=O)([O-])OCC[N+](C)(C)C	0.298732	0.52807	-0.517157	0.0767606	0.0217395	0.0355851	IMPC_HEM_008_001___1 point	Hematology	Platelet count	IMPC_HEM_008_001	20	20	19	17	significant	Different direction	IMPC_HEM_008_001	_00104_43
3768	ONLI_0439	CSHPOS	1-alkyl,2-acylglycero-3-phosphocholines	PC 16:0/o-20:5	YHSSHPWVFALMBA-IARQOZKNSA-N	10485310	CCCCCCCCCCCCCCCCOC[C@H](COP(=O)([O-])OCC[N+](C)(C)C)OC(=O)CCC/C=C\C/C=C\C/C=C\C/C=C\C/C=C\CC	-0.185154	0.508092	-0.501692	0.252704	0.0221794	0.024209	IMPC_CBC_010_001___1 point	Clinical Chemistry	Phosphorus	IMPC_CBC_010_001	20	20	20	20	significant	Different direction	IMPC_CBC_010_001	_0050_90
3196	ONLI_0381	CSHPOS	Phosphosphingolipids	SMd41:1	SXZWBNWTCVLZJN-NMIJJABPSA-N	46891684	CCCCCCCCCCCCCCCCCCCCCCC(=O)N[C@@H](COP(=O)([O-])OCC[N+](C)(C)C)[C@@H](/C=C/CCCCCCCCCCCCC)O	-0.461322	0.507901	-0.585935	0.00273434	0.022238	0.00663175	IMPC_CBC_015_001___1 point	Clinical Chemistry	Total cholesterol	IMPC_CBC_015_001	20	20	20	20	significant	Different direction	IMPC_CBC_015_001	_0054_123
78821	ONLI_1171	Oxylipins	Very long-chain fatty acids	17-HDoHE	SWTYBBUBEPPYCX-VIIQGJSXSA-N	6439179	CC/C=C\CC(/C=C/C=C\C/C=C\C/C=C\C/C=C\CCC(=O)O)O	0.167488	-0.573529	0.565934	0.383537	0.0223585	0.0473396	IMPC_HWT_999_999___1 point	Heart Weight	Heart weight normalised against tibia length	IMPC_HWT_999_999	18	15	17	18	significant	Different direction	IMPC_HWT_999_999	_00120_204
58730	ONLI_0750	HILICPOS	Dipeptides	Lys-Val	YQAIUOWPSUOINN-UHFFFAOYSA-N	140709	CC(C)C(C(=O)O)NC(=O)C(CCCCN)N	0.0795627	-0.524561	0.561865	0.630184	0.022753	0.00993078	IMPC_GRS_008_001___1 point	Grip Strength	Forelimb grip strength measurement mean	IMPC_GRS_008_001	20	20	19	20	significant	Different direction	IMPC_GRS_008_001	_0093_126
76539	ONLI_1142	Oxylipins	Lineolic acids and derivatives	12,13-DiHODE	RGRKFKRAFZJQMS-OOHFSOINSA-N	16061067	CC/C=C\CC(C(C/C=C\CCCCCCCC(=O)O)O)O	0.255762	-0.546961	0.775026	0.138088	0.0230752	0.000241003	IMPC_HWT_007_001___1 point	Heart Weight	Body weight	IMPC_HWT_007_001	17	18	20	20	significant	Different direction	IMPC_HWT_007_001	_00117_301
71070	ONLI_0966	HILICNEG	Hydroxycinnamic acids	Ferulic acid	KSEBMYQBYZTDHS-HWKANZROSA-N	445858	COC1=C(C=CC(=C1)/C=C/C(=O)O)O	0.137854	-0.509774	0.601754	0.401264	0.0231751	0.00751056	IMPC_OFD_047_001___20	Open Field	Center average speed series	IMPC_OFD_047_001.20	20	19	20	20	significant	Different direction	IMPC_OFD_047_001.20	_00192_123
25224	ONLI_0311	CSHPOS	Triacylglycerols	TAG 55:4; TAG 18:1-18:2-19:1;	MUPLOFIEWBEBDZ-GMWWFSEGSA-N	138214690	CCCCCCCCC/C=C\CCCCCCCC(=O)OCC(COC(=O)CCCCCCCCC/C=C\CCCCCC)OC(=O)CCCCCCCC/C=C\C=C/CCCCC	-0.097561	-0.503759	0.530827	0.547957	0.0250626	0.0174489	IMPC_OFD_010_001___1 point	Open Field	Periphery distance travelled	IMPC_OFD_010_001	20	20	20	20	significant	Different direction	IMPC_OFD_010_001	_00157_71
9019	ONLI_0109	gctof	Alpha amino acids	aminomalonate	JINBYESILADKFW-UHFFFAOYSA-N	100714	C(C(=O)O)(C(=O)O)N	0.117814	-0.496419	0.494112	0.469054	0.0259894	0.0268003	IMPC_OFD_048_001___15	Open Field	Number of center entries series	IMPC_OFD_048_001.15	20	20	20	20	significant	Different direction	IMPC_OFD_048_001.15	_00195_11
7090	ONLI_0082	gctof	Sugar alcohols	glycerol	PEDCQBHIVMGVHV-UHFFFAOYSA-N	753	C(C(CO)O)O	0.0988481	0.514035	-0.502451	0.566262	0.0260222	0.0418981	IMPC_HEM_032_001___1 point	Hematology	Lymphocyte cell count	IMPC_HEM_032_001	20	20	19	17	significant	Different direction	IMPC_HEM_032_001	_00110_5
78142	ONLI_1163	Oxylipins	Hydroxyeicosatetraenoic acids	8S-HETE	NLUNAYAEIJYXRB-VYOQERLCSA-N	5283154	CCCCC/C=C\C/C=C\C=C\[C@H](C/C=C\CCCC(=O)O)O	0.113254	-0.495109	0.513727	0.486548	0.0264473	0.0205064	IMPC_HWT_012_001___1 point	Heart Weight	Heart weight normalised against body weight	IMPC_HWT_012_001	20	20	20	20	significant	Different direction	IMPC_HWT_012_001	_00119_242
62148	ONLI_0809	HILICPOS	Pyrimidine nucleosides	N-Acetylcytidine	NIDVTARKFBZMOT-PEBGCTIMSA-N	107461	CC(=O)NC1=NC(=O)N(C=C1)[C@H]2[C@@H]([C@@H]([C@H](O2)CO)O)O	-0.0273921	0.497744	-0.475188	0.866581	0.0270715	0.0357808	IMPC_OFD_003_001___15	Open Field	Periphery distance travelled series	IMPC_OFD_003_001.15	20	20	20	20	significant	Different direction	IMPC_OFD_003_001.15	_00139_160
76124	ONLI_1138	Oxylipins	Long-chain fatty acids	9,10-e-DiHO	VACHUYIREGFMSP-SJORKVTESA-N	441460	CCCCCCCC[C@H]([C@H](CCCCCCCC(=O)O)O)O	0.00225183	-0.492285	0.515983	0.988997	0.0274563	0.0198653	IMPC_HWT_007_001___1 point	Heart Weight	Body weight	IMPC_HWT_007_001	20	20	20	20	significant	Different direction	IMPC_HWT_007_001	_00117_297
60613	ONLI_0781	HILICPOS	Tryptamines and derivatives	Tryptamine	APJYDQYYACXCRM-UHFFFAOYSA-N	1150	C1=CC=C2C(=C1)C(=CN2)CCN	-0.284948	0.508772	-0.572396	0.0787037	0.0277917	0.00835334	IMPC_GRS_008_001___1 point	Grip Strength	Forelimb grip strength measurement mean	IMPC_GRS_008_001	20	20	19	20	significant	Different direction	IMPC_GRS_008_001	_0093_132
7052	ONLI_0938	HILICNEG	Medium-chain hydroxy acids and derivatives	6-Hydroxycaproic acid	IWHLYPDWHHPVAA-UHFFFAOYSA-N	14490	C(CCC(=O)O)CCO	-0.0934352	-0.491162	0.519298	0.571558	0.0278656	0.0243438	IMPC_ACS_007_001___1 point	Acoustic Startle and Pre-pulse Inhibition (PPI)	Response amplitude - PP1_S	IMPC_ACS_007_001	20	19	20	20	significant	Different direction	IMPC_ACS_007_001	_0014_59
5662	ONLI_0711	HILICPOS	Hydroxypyrimidines	5-Methylcytosine	LRSASMSXMSNRBT-UHFFFAOYSA-N	65040	CC1=C(NC(=O)N=C1)N	-0.0343501	-0.491162	0.515231	0.833338	0.0278656	0.0200772	IMPC_CBC_004_001___1 point	Clinical Chemistry	Urea (Blood Urea Nitrogen - BUN)	IMPC_CBC_004_001	20	20	20	20	significant	Different direction	IMPC_CBC_004_001	_0044_197
62437	ONLI_0812	HILICPOS	Leucine and derivatives	N-Methylleucine	XJODGRWDFZVTKW-LURJTMIESA-N	2777993	CC(C)C[C@@H](C(=O)O)NC	-0.0467167	0.494737	-0.515789	0.774105	0.0281232	0.0214037	IMPC_OFD_005_001___5	Open Field	Distance travelled	IMPC_OFD_005_001.5	20	20	20	20	significant	Different direction	IMPC_OFD_005_001.5	_00149_41
62124	ONLI_0809	HILICPOS	Pyrimidine nucleosides	N-Acetylcytidine	NIDVTARKFBZMOT-PEBGCTIMSA-N	107461	CC(=O)NC1=NC(=O)N(C=C1)[C@H]2[C@@H]([C@@H]([C@H](O2)CO)O)O	0.0147811	-0.501975	0.521805	0.928836	0.0285253	0.0197431	IMPC_GRS_001_001___1	Grip Strength	Forelimb grip strength measurement	IMPC_GRS_001_001.1	20	20	19	20	significant	Different direction	IMPC_GRS_001_001.1	_0086_97
20312	ONLI_0257	CSHPOS	Cholesteryl esters	CE ( 22:4)	ITGTXSFLBABXQA-BMURBKCOSA-N	16061341	CCCCC/C=C\C/C=C\C/C=C\C/C=C\CCCCCC(=O)O[C@H]1CC[C@@]2([C@H]3CC[C@]4([C@H]([C@@H]3CC=C2C1)CC[C@@H]4[C@H](C)CCCC(C)C)C)C	0.0281908	0.499342	-0.564418	0.870355	0.0295055	0.0182605	IMPC_BWT_008_001___9	Body Weight	Body weight curve	IMPC_BWT_008_001.9	20	20	19	17	significant	Different direction	IMPC_BWT_008_001.9	_0036_70
23103	ONLI_0028	gctof	Nucleoside and nucleotide analogues	pseudo uridine	PTJWIQPHWPFNBW-GBNDHIKLSA-N	15047	C1=C(C(=O)NC(=O)N1)[C@H]2[C@@H]([C@@H]([C@H](O2)CO)O)O	-0.00751598	0.485693	-0.586197	0.963288	0.0299289	0.00660149	IMPC_ECG_005_001___1 point	Electrocardiogram (ECG)	PQ	IMPC_ECG_005_001	20	20	20	20	significant	Different direction	IMPC_ECG_005_001	_0075_3
8823	ONLI_0104	gctof	Beta amino acids and derivatives	beta-alanine	UCMIRNVEIXFBKS-UHFFFAOYSA-N	239	C(CN)C(=O)O	0.168372	-0.48549	0.605491	0.299016	0.0300079	0.00466776	IMPC_OFD_006_001___15	Open Field	Number of Rears	IMPC_OFD_006_001.15	20	20	20	20	significant	Different direction	IMPC_OFD_006_001.15	_00151_12
46	ONLI_0057	gctof	Medium-chain fatty acids	lauric acid	POULHZVOKOAJMA-UHFFFAOYSA-N	3893	CCCCCCCCCCCC(=O)O	-0.0620505	0.755929	-0.717256	0.819423	0.0300197	0.0452038	IMPC_ABR_008_001___1 point	Auditory Brain Stem Response	18kHz-evoked ABR Threshold	IMPC_ABR_008_001	20	20	8	8	significant	Different direction	IMPC_ABR_008_001	_005_4
7854	ONLI_1167	Oxylipins	Hydroxyeicosapentaenoic acids	15-HEPE	UDXLGBLAJBYLSZ-XBCQTNLFSA-N	53480357	CC/C=C\C(C/C=C/C=C\C/C=C\C/C=C\CCCC(=O)O)O	0.227134	-0.754505	0.8	0.380648	0.0305128	0.0138283	IMPC_CAL_002_001___1 point	Indirect Calorimetry	Body weight after experiment	IMPC_CAL_002_001	8	10	18	17	significant	Different direction	IMPC_CAL_002_001	_0038_189
35028	ONLI_0412	CSHPOS	Triacylglycerols	TAG 56:3; TAG 14:0-20:0-22:3;	WOXDUJQRLLENEU-JYISLEBKSA-N	138290251	CCCCCCCCCCCCCCCCCCCC(=O)OC(COC(=O)CCCCCCCCCCCCC)COC(=O)CCCCCCCCCCC/C=C\C/C=C\C/C=C\CC	0.126947	-0.487218	0.532732	0.435044	0.0308957	0.0155903	IMPC_OFD_017_001___1 point	Open Field	Center average speed	IMPC_OFD_017_001	20	20	20	20	significant	Different direction	IMPC_OFD_017_001	_00164_102
24150	ONLI_0296	CSHPOS	Phosphatidylcholines	PC 40:8; PC 20:4-20:4;	LZLVZIFMYXDKCN-QJWFYWCHSA-N	24779076	CCCCC/C=C\C/C=C\C/C=C\C/C=C\CCCC(=O)OC[C@H](COP(=O)([O-])OCC[N+](C)(C)C)OC(=O)CCC/C=C\C/C=C\C/C=C\C/C=C\CCCCC	-0.250586	-0.482888	0.471606	0.118856	0.0310327	0.0357981	IMPC_OFD_043_001___10	Open Field	Periphery average speed series	IMPC_OFD_043_001.10	20	20	20	20	significant	Different direction	IMPC_OFD_043_001.10	_00174_50
72314	ONLI_1017	HILICNEG	Tyrosine and derivatives	N-Acetyl-L-tyrosine	CAHKINHBCWCHCF-JTQLQIEISA-N	68310	CC(=O)N[C@@H](CC1=CC=C(C=C1)O)C(=O)O	0.09113	-0.482499	0.542581	0.581126	0.0311882	0.0163837	IMPC_ECG_002_001___1 point	Electrocardiogram (ECG)	HR	IMPC_ECG_002_001	20	19	20	20	significant	Different direction	IMPC_ECG_002_001	_0072_134
52313	ONLI_0643	CSHNEG	Phosphatidylcholines	PC 37:1; PC 19:0-18:1;	WMCPHMOQTITNBG-KXTYCBLYSA-N	52922955	CCCCCCCCCCCCCCCCCCC(=O)OC[C@H](COP(=O)([O-])OCC[N+](C)(C)C)OC(=O)CCCCCCC/C=C\CCCCCCCC	0.793637	-0.604396	0.608216	1.67436e-07	0.0321195	0.00958395	IMPC_BWT_008_001___7	Body Weight	Body weight curve	IMPC_BWT_008_001.7	20	20	13	17	significant	Different direction	IMPC_BWT_008_001.7	_0034_184
54731	ONLI_0671	CSHNEG	Phosphatidylcholines	PC 40:8; PC 18:2-22:6;	FCTKCFNDGVBOBD-YZXVGOFNSA-N	24778983	CCCCC/C=C\C/C=C\CCCCCCCC(=O)OC[C@H](COP(=O)([O-])OCC[N+](C)(C)C)OC(=O)CC/C=C\C/C=C\C/C=C\C/C=C\C/C=C\C/C=C\CC	0.185726	0.496491	-0.517157	0.278143	0.0322937	0.0355851	IMPC_HEM_032_001___1 point	Hematology	Lymphocyte cell count	IMPC_HEM_032_001	20	20	19	17	significant	Different direction	IMPC_HEM_032_001	_00110_48
18156	ONLI_0023	gctof	Pentoses	ribose	HMFHBZSHGGEWLO-SOOFDHNKSA-N	5779	C([C@@H]1[C@H]([C@H](C(O1)O)O)O)O	-0.141088	0.482707	-0.458647	0.383842	0.0326611	0.0434755	IMPC_OFD_018_001___1 point	Open Field	Latency to center entry	IMPC_OFD_018_001	20	20	20	20	significant	Different direction	IMPC_OFD_018_001	_00165_2
78917	ONLI_1172	Oxylipins	Very long-chain fatty acids	14-HDoHE	ZNEBXONKCYFJAF-BGKMTWLOSA-N	11566378	CC/C=C\C/C=C\CC(/C=C/C=C\C/C=C\C/C=C\CCC(=O)O)O	0.0546197	-0.478524	0.516736	0.73782	0.0328131	0.0196552	IMPC_HWT_008_001___1 point	Heart Weight	Heart weight	IMPC_HWT_008_001	20	20	20	20	significant	Different direction	IMPC_HWT_008_001	_00118_193
14135	ONLI_0189	CSHPOS	Triacylglycerols	TAG 54:3; TAG 16:0-18:0-20:3;	CICXNKCKBFXJSH-LZWIKYMTSA-N	131755017	CCCCCCCCCCCCCCCCCC(=O)O[C@@H](COC(=O)CCCCCCCCCCCCCCC)COC(=O)CCC/C=C\C/C=C\C/C=C\CCCCCCCC	0.106117	-0.481203	0.510158	0.51459	0.0332671	0.0215539	IMPC_OFD_017_001___1 point	Open Field	Center average speed	IMPC_OFD_017_001	20	20	20	20	significant	Different direction	IMPC_OFD_017_001	_00164_21
7456	ONLI_1097	BileAcid_Steroids	Trihydroxy bile acids, alcohols and derivatives	omega-Muricholic acid	DKPMWHFRUGMUKF-NTPBNISXSA-N	5283851	C[C@H](CCC(=O)O)[C@H]1CC[C@@H]2[C@@]1(CC[C@H]3[C@H]2[C@H]([C@@H]([C@H]4[C@@]3(CC[C@H](C4)O)C)O)O)C	-0.0613111	0.569857	-0.551648	0.756616	0.0333807	0.0438823	IMPC_DXA_008_001___1 point	Body Composition (DEXA lean/fat)	Lean/Body weight	IMPC_DXA_008_001	15	14	18	19	significant	Different direction	IMPC_DXA_008_001	_0068_155
7659	ONLI_1142	Oxylipins	Lineolic acids and derivatives	12,13-DiHODE	RGRKFKRAFZJQMS-OOHFSOINSA-N	16061067	CC/C=C\CC(C(C/C=C\CCCCCCCC(=O)O)O)O	0.267114	-0.590909	0.785714	0.169407	0.0334501	0.000820674	IMPC_BWT_008_001___15	Body Weight	Body weight curve	IMPC_BWT_008_001.15	17	18	16	17	significant	Different direction	IMPC_BWT_008_001.15	_0029_278
308	ONLI_0036	gctof	Medium-chain fatty acids	pelargonic acid	FBUKVWPVBMHYJY-UHFFFAOYSA-N	8158	CCCCCCCCC(=O)O	-0.0728844	0.476985	-0.477623	0.654919	0.03346	0.0331904	IMPC_ACS_003_001___1 point	Acoustic Startle and Pre-pulse Inhibition (PPI)	Response amplitude - PP2	IMPC_ACS_003_001	20	20	20	20	significant	Different direction	IMPC_ACS_003_001	_0010_6
76116	ONLI_1138	Oxylipins	Long-chain fatty acids	9,10-e-DiHO	VACHUYIREGFMSP-SJORKVTESA-N	441460	CCCCCCCC[C@H]([C@H](CCCCCCCC(=O)O)O)O	0.0150746	0.533016	-0.65307	0.938136	0.033506	0.0155123	IMPC_ECG_015_001___1 point	Electrocardiogram (ECG)	pNN5(6>ms)	IMPC_ECG_015_001	20	20	16	13	significant	Different direction	IMPC_ECG_015_001	_0085_194
5412	ONLI_0065	gctof	Arylsulfates	indoxyl sulfate	BXFFHSIDQOFMLE-UHFFFAOYSA-N	10258	C1=CC=C2C(=C1)C(=CN2)OS(=O)(=O)O	-0.137342	0.476263	-0.614922	0.398057	0.0337663	0.0039089	IMPC_ACS_004_001___1 point	Acoustic Startle and Pre-pulse Inhibition (PPI)	Response amplitude - PP3	IMPC_ACS_004_001	20	20	20	20	significant	Different direction	IMPC_ACS_004_001	_0011_22
6893	ONLI_0908	HILICNEG	Medium-chain hydroxy acids and derivatives	10-Hydroxydecanoic acid	YJCJVMMDTBEITC-UHFFFAOYSA-N	74300	C(CCCCC(=O)O)CCCCO	-0.0487904	-0.479699	0.463158	0.768026	0.0338819	0.0474618	IMPC_ACS_007_001___1 point	Acoustic Startle and Pre-pulse Inhibition (PPI)	Response amplitude - PP1_S	IMPC_ACS_007_001	20	19	20	20	significant	Different direction	IMPC_ACS_007_001	_0014_52
36336	ONLI_0425	CSHPOS	Cholesteryl esters	CE ( 22:5)	XOLZNHXNFMEUGA-DCDLNIKOSA-N	42608400	CC/C=C\C/C=C\C/C=C\C/C=C\C/C=C\CCCCCC(=O)O[C@H]1CC[C@@]2([C@H]3CC[C@]4([C@H]([C@@H]3CC=C2C1)CC[C@@H]4[C@H](C)CCCC(C)C)C)C	0.216645	-0.479699	0.676449	0.179355	0.0338819	0.00105701	IMPC_OFD_017_001___1 point	Open Field	Center average speed	IMPC_OFD_017_001	20	20	20	20	significant	Different direction	IMPC_OFD_017_001	_00164_106
11629	ONLI_0162	CSHPOS	Triacylglycerols	TAG 55:2; TAG 17:0-18:1-20:1;	AKDAPWJIGQLALK-XSUIJCOHSA-N	134718461	CCCCCCCCCCCCCCCCC(=O)OC[C@H](COC(=O)CCCCCCCCC/C=C/CCCCCCCC)OC(=O)CCCCCCCCC/C=C/CCCCCC	0.204697	-0.491228	0.604214	0.211289	0.0343915	0.00477926	IMPC_OFD_017_001___1 point	Open Field	Center average speed	IMPC_OFD_017_001	19	20	20	20	significant	Different direction	IMPC_OFD_017_001	_00164_11
18530	ONLI_0236	CSHPOS	Cholesteryl esters	CE (16:1)	HODJWNWCVNUPAQ-XDOSKZMUSA-N	13828666	CCCCCC/C=C\CCCCCCCC(=O)O[C@H]1CC[C@@]2([C@H]3CC[C@]4([C@H]([C@@H]3CC=C2C1)CC[C@@H]4[C@H](C)CCCC(C)C)C)C	0.206823	-0.491228	0.65839	0.206482	0.0343915	0.0015984	IMPC_OFD_017_001___1 point	Open Field	Center average speed	IMPC_OFD_017_001	19	20	20	20	significant	Different direction	IMPC_OFD_017_001	_00164_42
69016	ONLI_0914	HILICNEG	Salicylic acids	2,6-Dihydroxybenzoic acid	AKEUNCKRJATALU-UHFFFAOYSA-N	9338	C1=CC(=C(C(=C1)O)C(=O)O)O	0.0290042	0.487014	-0.483436	0.866647	0.0344497	0.0493015	IMPC_HEM_003_001___1 point	Hematology	Hemoglobin	IMPC_HEM_003_001	20	19	19	17	significant	Different direction	IMPC_HEM_003_001	_0099_73
7246	ONLI_1021	HILICNEG	L-alpha-amino acids	N-epsilon-Acetyllysine	DTERQYGMUDWYAZ-ZETCQYMHSA-N	92832	CC(=O)NCCCC[C@@H](C(=O)O)N	-0.0398785	0.478195	-0.64386	0.8091	0.0345058	0.00366614	IMPC_ACS_035_001___1 point	Acoustic Startle and Pre-pulse Inhibition (PPI)	% Pre-pulse inhibition - PPI3	IMPC_ACS_035_001	20	19	20	20	significant	Different direction	IMPC_ACS_035_001	_0020_61
52242	ONLI_0641	CSHNEG	Phosphatidylinositols	PI 36:3; PI 18:1-18:2;	MXJMOLQIXMJUEL-PEAJWMICSA-N	52928384	CCCCCCCC/C=C\CCCCCCCC(=O)OC[C@H](COP(=O)(O)OC1C([C@@H](C(C(C1O)O)O)O)O)OC(=O)CCCCCCC/C=C\C/C=C\CCCCC	-0.275729	-0.47311	0.448289	0.0850461	0.0351317	0.0474382	IMPC_OFD_043_001___10	Open Field	Periphery average speed series	IMPC_OFD_043_001.10	20	20	20	20	significant	Different direction	IMPC_OFD_043_001.10	_00174_120
24136	ONLI_0296	CSHPOS	Phosphatidylcholines	PC 40:8; PC 20:4-20:4;	LZLVZIFMYXDKCN-QJWFYWCHSA-N	24779076	CCCCC/C=C\C/C=C\C/C=C\C/C=C\CCCC(=O)OC[C@H](COP(=O)([O-])OCC[N+](C)(C)C)OC(=O)CCC/C=C\C/C=C\C/C=C\C/C=C\CCCCC	0.225169	0.485301	-0.539216	0.186713	0.0351848	0.0275331	IMPC_HEM_001_001___1 point	Hematology	White blood cell count	IMPC_HEM_001_001	20	20	19	17	significant	Different direction	IMPC_HEM_001_001	_0097_26
39821	ONLI_0475	CSHNEG	Long-chain fatty acids	FA 15:1	DJCQJZKZUCHHAL-VOTSOKGWSA-N	6365140	CCCCC/C=C/CCCCCCCC(=O)O	0.0306385	-0.485301	0.509804	0.859206	0.0351848	0.0386416	IMPC_HEM_005_001___1 point	Hematology	Mean cell volume	IMPC_HEM_005_001	20	20	19	17	significant	Different direction	IMPC_HEM_005_001	_00101_21
29810	ONLI_0358	CSHPOS	1-alkyl,2-acylglycero-3-phosphocholines	PCo-40:4	RDNHPNJCALITSY-MBZSPAKGSA-N	52923852	CCCCCCCCCCCCCCCCCCCCOC[C@H](COP(=O)([O-])OCC[N+](C)(C)C)OC(=O)CCC/C=C\C/C=C\C/C=C\C/C=C\CCCCC	-0.146303	-0.471783	0.591645	0.367685	0.0357189	0.00599882	IMPC_CBC_001_001___1 point	Clinical Chemistry	Sodium	IMPC_CBC_001_001	20	20	20	20	significant	Different direction	IMPC_CBC_001_001	_0041_48
18425	ONLI_0235	CSHPOS	Triacylglycerols	TAG 56:4; TAG 18:1-18:2-20:1;	YONCDTJKIZDSKQ-UVIGLXQBSA-N	131750415	CCCCCCCC/C=C\CCCCCCCCCC(=O)OC[C@H](COC(=O)CCCCCCC/C=C\CCCCCCCC)OC(=O)CCCCCCC/C=C\C/C=C\CCCCC	0.148621	-0.475188	0.600452	0.36006	0.0357808	0.00512063	IMPC_OFD_017_001___1 point	Open Field	Center average speed	IMPC_OFD_017_001	20	20	20	20	significant	Different direction	IMPC_OFD_017_001	_00164_41
18946	ONLI_0240	CSHPOS	1-(1Z-alkenyl)-glycero-3-phosphocholines	LPC p-16:0	HTZINLFNXLXRBC-CQLBIITFSA-N	10917802	CCCCCCCCCCCCCC/C=C\OC[C@H](COP(=O)([O-])OCC[N+](C)(C)C)O	0.0107345	-0.470768	0.455142	0.947585	0.0361733	0.0437517	IMPC_OFD_048_001___15	Open Field	Number of center entries series	IMPC_OFD_048_001.15	20	20	20	20	significant	Different direction	IMPC_OFD_048_001.15	_00195_14
14129	ONLI_0189	CSHPOS	Triacylglycerols	TAG 54:3; TAG 16:0-18:0-20:3;	CICXNKCKBFXJSH-LZWIKYMTSA-N	131755017	CCCCCCCCCCCCCCCCCC(=O)O[C@@H](COC(=O)CCCCCCCCCCCCCCC)COC(=O)CCC/C=C\C/C=C\C/C=C\CCCCCCCC	-0.0185741	-0.473684	0.449624	0.909455	0.0364322	0.0481889	IMPC_OFD_010_001___1 point	Open Field	Periphery distance travelled	IMPC_OFD_010_001	20	20	20	20	significant	Different direction	IMPC_OFD_010_001	_00157_15
34333	ONLI_0405	CSHPOS	Triacylglycerols	TAG 49:2; TAG 15:0-16:0-18:2;	DDWAXVHDVUVXSQ-ZDFZEWNHSA-N	131754166	CCCCCCCCCCCCCCCC(=O)O[C@@H](COC(=O)CCCCCCCCCCCCCC)COC(=O)CCCCCCC/C=C\C/C=C\CCCCC	0.175643	-0.473684	0.569601	0.278324	0.0364322	0.00875046	IMPC_OFD_017_001___1 point	Open Field	Center average speed	IMPC_OFD_017_001	20	20	20	20	significant	Different direction	IMPC_OFD_017_001	_00164_99
26554	ONLI_0324	CSHPOS	1-alkyl,2-acylglycerophosphoethanolamines	PE 36:5e; PE 16:0e/20:5;	NTBDNAWCQLUDHG-CEGBOXLASA-N	52925030	CCCCCCCCCCCCCCCCOC[C@H](COP(=O)(O)OCCN)OC(=O)CCC/C=C\C/C=C\C/C=C\C/C=C\C/C=C\CC	0.0793621	0.473684	-0.446617	0.625305	0.0364322	0.0498458	IMPC_OFD_004_001___15	Open Field	Periphery resting time series	IMPC_OFD_004_001.15	20	20	20	20	significant	Different direction	IMPC_OFD_004_001.15	_00143_52
45818	ONLI_0563	CSHNEG	Sphingomyelins	SM d33:1; SM d17:1/16:0;	CGMZWBZSOINWHL-YPDYIYJKSA-N	52931137	CCCCCCCCCCCCCCCCC(=O)N[C@@H](COP(=O)([O-])OCC[N+](C)(C)C)[C@@H](/C=C/CCCCCCCCCCC)O	-0.371267	0.482002	-0.521153	0.0257912	0.0366342	0.0319344	IMPC_HEM_030_001___1 point	Hematology	Neutrophil cell count	IMPC_HEM_030_001	20	20	19	17	significant	Different direction	IMPC_HEM_030_001	_00108_163
44132	ONLI_0542	CSHNEG	Phytoceramides	Cer-NP t40:0; Cer-NP t18:0/22:0;	CIMNZQFRNXDRER-HIERITDVSA-N	5322153	CCCCCCCCCCCCCCCCCCCCCC(=O)N[C@@H](CO)[C@@H]([C@@H](CCCCCCCCCCCCCC)O)O	-0.364777	0.484211	-0.457143	0.0230019	0.0373544	0.0442348	IMPC_GRS_010_001___1 point	Grip Strength	Forelimb grip strength normalised against body weight	IMPC_GRS_010_001	20	20	19	20	significant	Different direction	IMPC_GRS_010_001	_0095_182
2379	ONLI_0028	gctof	Nucleoside and nucleotide analogues	pseudo uridine	PTJWIQPHWPFNBW-GBNDHIKLSA-N	15047	C1=C(C(=O)NC(=O)N1)[C@H]2[C@@H]([C@@H]([C@H](O2)CO)O)O	-0.0567691	-0.493536	0.473048	0.738583	0.0373936	0.0408019	IMPC_DXA_006_001___1 point	Body Composition (DEXA lean/fat)	Body length	IMPC_DXA_006_001	20	20	18	19	significant	Different direction	IMPC_DXA_006_001	_0066_6
31139	ONLI_0372	CSHPOS	1-alkyl,2-acylglycero-3-phosphocholines	PC 36:2e; PC 18:1e/18:1;	GSROTDACALJGFK-YIFANWOHSA-N	53481725	CCCCCCCC/C=C\CCCCCCCCOC[C@H](COP(=O)([O-])OCC[N+](C)(C)C)OC(=O)CCCCCCCCC/C=C\CCCCCC	0.483754	0.512255	-0.593395	0.00359	0.0376009	0.0108352	IMPC_HWT_999_999___1 point	Heart Weight	Heart weight normalised against tibia length	IMPC_HWT_999_999	20	20	17	18	significant	Different direction	IMPC_HWT_999_999	_00120_80
26930	ONLI_0328	CSHPOS	Triacylglycerols	TAG 54:5; TAG 18:0-18:2-18:3;	FOOVNYMOCOZYCS-FEJMAITCSA-N	131756093	CCCCCCCCCCCCCCCCCC(=O)OC[C@@H](COC(=O)CCCC/C=C\C/C=C\C/C=C\CCCCC)OC(=O)CCCCCCC/C=C\C/C=C\CCCCC	0.0178236	-0.470677	0.490226	0.913118	0.037763	0.0297617	IMPC_OFD_010_001___1 point	Open Field	Periphery distance travelled	IMPC_OFD_010_001	20	20	20	20	significant	Different direction	IMPC_OFD_010_001	_00157_77
25528	ONLI_0314	CSHPOS	Cholesteryl esters	CE (18:2)	NAACPBBQTFFYQB-XHDSEGDBSA-N	131801653	CCCCC/C=C\C/C=C\CCCCCCCC(=O)O[C@H]1CC[C@@]2(C3CC[C@]4(C(C3CC=C2C1)CCC4[C@H](C)CCCC(C)C)C)C	0.0839745	-0.470677	0.45222	0.606433	0.037763	0.0452957	IMPC_OFD_017_001___1 point	Open Field	Center average speed	IMPC_OFD_017_001	20	20	20	20	significant	Different direction	IMPC_OFD_017_001	_00164_73
57939	ONLI_0739	HILICPOS	Acyl carnitines	Isovaleryl-L-carnitine	IGQBPDJNUXPEMT-UHFFFAOYSA-N	6426851	CC(C)CC(=O)OC(CC(=O)[O-])C[N+](C)(C)C	-0.0120075	0.469173	-0.463158	0.941557	0.0384427	0.0412588	IMPC_OFD_044_001___5	Open Field	Center distance travelled series	IMPC_OFD_044_001.5	20	20	20	20	significant	Different direction	IMPC_OFD_044_001.5	_00181_66
71612	ONLI_0993	HILICNEG	Methoxyphenols	Homovanillic acid	QRMZSPFSDQBLIX-UHFFFAOYSA-N	1738	COC1=C(C=CC(=C1)CC(=O)O)O	-0.00322613	-0.494324	0.730769	0.986258	0.0389091	0.00632275	IMPC_HEM_008_001___1 point	Hematology	Platelet count	IMPC_HEM_008_001	19	14	19	17	significant	Different direction	IMPC_HEM_008_001	_00104_128
38117	ONLI_0445	CSHPOS	Phosphatidylcholines	PC 39:5; PC 19:0-20:5;	YTUVRFVITPTFSM-ZDQXWTFCSA-N	52922977	CCCCCCCCCCCCCCCCCCC(=O)OC[C@H](COP(=O)([O-])OCC[N+](C)(C)C)OC(=O)CCC/C=C\C/C=C\C/C=C\C/C=C\C/C=C\CC	0.198264	0.464836	-0.622556	0.220052	0.0389193	0.00410974	IMPC_CBC_013_001___1 point	Clinical Chemistry	Alanine aminotransferase	IMPC_CBC_013_001	20	20	20	20	significant	Different direction	IMPC_CBC_013_001	_0052_94
72315	ONLI_1017	HILICNEG	Tyrosine and derivatives	N-Acetyl-L-tyrosine	CAHKINHBCWCHCF-JTQLQIEISA-N	68310	CC(=O)N[C@@H](CC1=CC=C(C=C1)O)C(=O)O	-0.108861	0.464434	-0.536842	0.509458	0.0391114	0.0193634	IMPC_ECG_004_001___1 point	Electrocardiogram (ECG)	RR	IMPC_ECG_004_001	20	19	20	20	significant	Different direction	IMPC_ECG_004_001	_0074_144
6916	ONLI_0916	HILICNEG	Pyrimidine 2'-deoxyribonucleosides	2-Deoxyuridine	MXHRCPNRJAMMIM-SHYZEUOFSA-N	13712	C1[C@@H]([C@H](O[C@H]1N2C=CC(=O)NC2=O)CO)O	0.011336	0.467669	-0.501754	0.945614	0.0391321	0.0302985	IMPC_ACS_034_001___1 point	Acoustic Startle and Pre-pulse Inhibition (PPI)	% Pre-pulse inhibition - PPI2	IMPC_ACS_034_001	20	19	20	20	significant	Different direction	IMPC_ACS_034_001	_0019_104
76510	ONLI_1142	Oxylipins	Lineolic acids and derivatives	12,13-DiHODE	RGRKFKRAFZJQMS-OOHFSOINSA-N	16061067	CC/C=C\CC(C(C/C=C\CCCCCCCC(=O)O)O)O	0.271756	-0.574966	0.745055	0.170302	0.0398181	0.0032514	IMPC_BWT_008_001___16	Body Weight	Body weight curve	IMPC_BWT_008_001.16	17	18	16	15	significant	Different direction	IMPC_BWT_008_001.16	_0030_263
71713	ONLI_0995	HILICNEG	Indolecarboxylic acids and derivatives	Indole-3-carboxylic acid	KMAKOBLIOCQGJP-UHFFFAOYSA-N	69867	C1=CC=C2C(=C1)C(=CN2)C(=O)O	0.0704749	-0.461828	0.488132	0.674158	0.0403725	0.0417148	IMPC_ECG_010_001___1 point	Electrocardiogram (ECG)	HRV	IMPC_ECG_010_001	20	18	20	20	significant	Different direction	IMPC_ECG_010_001	_0080_60
43124	ONLI_0524	CSHNEG	1-acyl-sn-glycero-3-phosphocholines	LPC 20:3 a	BBNHCUBQEQJHIG-FZZJNMCHSA-N	52924055	CCCCC/C=C\C/C=C\C/C=C\CCCCCCC(=O)OC[C@H](COP(=O)([O-])OCC[N+](C)(C)C)O	0.114687	0.500922	-0.552283	0.525086	0.0405389	0.0265312	IMPC_ECG_009_001___1 point	Electrocardiogram (ECG)	QTc	IMPC_ECG_009_001	20	20	17	16	significant	Different direction	IMPC_ECG_009_001	_0079_58
15013	ONLI_0198	CSHPOS	Triacylglycerols	TAG 56:7; TAG 16:0-18:1-22:6;	DNTWVXNMAFTXDU-RVFBAGKZSA-N	131755186	CCCCCCCCCCCCCCCC(=O)OC[C@@H](COC(=O)CC/C=C\C/C=C\C/C=C\C/C=C\C/C=C\C/C=C\CC)OC(=O)CCCCCCCCC/C=C\CCCCCC	0.0133208	-0.464662	0.466165	0.935128	0.04054	0.0398311	IMPC_OFD_003_001___10	Open Field	Periphery distance travelled series	IMPC_OFD_003_001.10	20	20	20	20	significant	Different direction	IMPC_OFD_003_001.10	_00138_20
8821	ONLI_0104	gctof	Beta amino acids and derivatives	beta-alanine	UCMIRNVEIXFBKS-UHFFFAOYSA-N	239	C(CN)C(=O)O	0.109756	-0.464662	0.639098	0.498838	0.04054	0.0030283	IMPC_OFD_005_001___15	Open Field	Distance travelled	IMPC_OFD_005_001.15	20	20	20	20	significant	Different direction	IMPC_OFD_005_001.15	_00147_5
54729	ONLI_0671	CSHNEG	Phosphatidylcholines	PC 40:8; PC 18:2-22:6;	FCTKCFNDGVBOBD-YZXVGOFNSA-N	24778983	CCCCC/C=C\C/C=C\CCCCCCCC(=O)OC[C@H](COP(=O)([O-])OCC[N+](C)(C)C)OC(=O)CC/C=C\C/C=C\C/C=C\C/C=C\C/C=C\C/C=C\CC	0.201738	0.473015	-0.610294	0.238044	0.040818	0.0108026	IMPC_HEM_001_001___1 point	Hematology	White blood cell count	IMPC_HEM_001_001	20	20	19	17	significant	Different direction	IMPC_HEM_001_001	_0097_53
50923	ONLI_0621	CSHNEG	Phosphatidylcholines	PC 36:3 b	XMZFUVYOYPLVOA-VLHUWQDUSA-N	24778715	CCCCCCCCCCCCCCCC(=O)OC[C@H](COP(=O)([O-])OCC[N+](C)(C)C)OC(=O)CCC/C=C\C/C=C\C/C=C\CCCCCCCC	-0.0228893	-0.463158	0.508271	0.888435	0.0412588	0.0236359	IMPC_OFD_003_001___10	Open Field	Periphery distance travelled series	IMPC_OFD_003_001.10	20	20	20	20	significant	Different direction	IMPC_OFD_003_001.10	_00138_199
70835	ONLI_0954	HILICNEG	Methyl-branched fatty acids	Citraconic acid	HNEGQIOMVPPMNR-IHWYPQMZSA-N	643798	C/C(=C/C(=O)O)/C(=O)O	0.01417	-0.463158	0.494737	0.931924	0.0412588	0.0329814	IMPC_OFD_005_001___5	Open Field	Distance travelled	IMPC_OFD_005_001.5	20	19	20	20	significant	Different direction	IMPC_OFD_005_001.5	_00149_56
5024	ONLI_0613	CSHNEG	Phosphatidylcholines	PC 35:1; PC 17:0-18:1;	SXNXGNVZTLZDHE-IYEJTHTFSA-O	5313302	CCCCCCCCCCCCCCCCC(=O)OC[C@H](COP(=O)(O)OCC[N+](C)(C)C)OC(=O)CCCCCCC/C=C\CCCCCCCC	0.699916	-0.484254	0.527348	2.02557e-06	0.0417044	0.0263412	IMPC_BWT_008_001___11	Body Weight	Body weight curve	IMPC_BWT_008_001.11	20	20	18	18	significant	Different direction	IMPC_BWT_008_001.11	_0025_172
55172	ONLI_0675	CSHNEG	Phosphatidylcholines	PC 40:4	UAVRPIXHIHJERN-CBTSKTMBSA-N	24779048	CCCCCCCCCCCCCCCCCCCC(=O)OC[C@H](COP(=O)([O-])OCC[N+](C)(C)C)OC(=O)CCC/C=C\C/C=C\C/C=C\C/C=C\CCCCC	-0.0834897	0.461654	-0.47218	0.607364	0.0419875	0.0370929	IMPC_OFD_044_001___5	Open Field	Center distance travelled series	IMPC_OFD_044_001.5	20	20	20	20	significant	Different direction	IMPC_OFD_044_001.5	_00181_61
79225	ONLI_1175	Oxylipins	Lineolic acids and derivatives	9-KODE	LUZSWWYKKLTDHU-ZJHFMPGASA-N	9839084	CCCCC/C=C\C=C\C(=O)CCCCCCCC(=O)O	0.0189493	-0.461654	0.618045	0.907625	0.0419875	0.00445435	IMPC_OFD_003_001___5	Open Field	Periphery distance travelled series	IMPC_OFD_003_001.5	20	20	20	20	significant	Different direction	IMPC_OFD_003_001.5	_00141_112
6974	ONLI_0924	HILICNEG	Medium-chain hydroxy acids and derivatives	3-Hydroxyoctanoic acid	NDPLAKGOSZHTPH-UHFFFAOYSA-N	26613	CCCCCC(CC(=O)O)O	0.0407915	0.458067	-0.5	0.805251	0.0422476	0.0309524	IMPC_ACS_033_001___1 point	Acoustic Startle and Pre-pulse Inhibition (PPI)	% Pre-pulse inhibition - PPI1	IMPC_ACS_033_001	20	19	20	20	significant	Different direction	IMPC_ACS_033_001	_0018_90
7153	ONLI_0989	HILICNEG	N-acyl-alpha amino acids	Hexanoylglycine	UPCKIPHSXMXJOX-UHFFFAOYSA-N	99463	CCCCCC(=O)NCC(=O)O	-0.0110294	0.517647	-0.585784	0.951877	0.0423216	0.0152273	IMPC_BWT_008_001___4	Body Weight	Body weight curve	IMPC_BWT_008_001.4	20	19	16	18	significant	Different direction	IMPC_BWT_008_001.4	_0031_298
5092	ONLI_0621	CSHNEG	Phosphatidylcholines	PC 36:3 b	XMZFUVYOYPLVOA-VLHUWQDUSA-N	24778715	CCCCCCCCCCCCCCCC(=O)OC[C@H](COP(=O)([O-])OCC[N+](C)(C)C)OC(=O)CCC/C=C\C/C=C\C/C=C\CCCCCCCC	0.247065	-0.457424	0.644312	0.124303	0.0425749	0.00216703	IMPC_ACS_004_001___1 point	Acoustic Startle and Pre-pulse Inhibition (PPI)	Response amplitude - PP3	IMPC_ACS_004_001	20	20	20	20	significant	Different direction	IMPC_ACS_004_001	_0011_95
22432	ONLI_0278	CSHPOS	Triacylglycerols	TAG 58:5; TAG 18:1-18:2-22:2;	NRIOEETWLZWDRL-NUDAZDJUSA-N	131760195	CCCCCC/C=C\CCCCCCCCCC(=O)OC[C@@H](COC(=O)CCCCCCCCCCC/C=C\C/C=C\CCCCC)OC(=O)CCCCCCC/C=C\C/C=C\CCCCC	0.135016	-0.46015	0.586155	0.406171	0.0427264	0.00660633	IMPC_OFD_017_001___1 point	Open Field	Center average speed	IMPC_OFD_017_001	20	20	20	20	significant	Different direction	IMPC_OFD_017_001	_00164_60
62435	ONLI_0812	HILICPOS	Leucine and derivatives	N-Methylleucine	XJODGRWDFZVTKW-LURJTMIESA-N	2777993	CC(C)C[C@@H](C(=O)O)NC	0.000187617	0.458647	-0.518797	0.999539	0.0434755	0.0205599	IMPC_OFD_003_001___5	Open Field	Periphery distance travelled series	IMPC_OFD_003_001.5	20	20	20	20	significant	Different direction	IMPC_OFD_003_001.5	_00141_86
31438	ONLI_0375	CSHPOS	Phosphatidylcholines	PC36:6	SPWBDEZMKCRQSX-NGPPOSSDSA-N	52922847	CCCCC/C=C\C/C=C\C/C=C\CCCCC(=O)O[C@H](COC(=O)CCCCCCC/C=C\C/C=C\C/C=C\CC)COP(=O)([O-])OCC[N+](C)(C)C	0.140458	-0.458647	0.560572	0.387334	0.0434755	0.0101402	IMPC_OFD_017_001___1 point	Open Field	Center average speed	IMPC_OFD_017_001	20	20	20	20	significant	Different direction	IMPC_OFD_017_001	_00164_90
7356	ONLI_1059	HILICNEG	Dipeptides	Val-Asp	OBTCMSPFOITUIJ-UHFFFAOYSA-N	9964657	CC(C)C(C(=O)NC(CC(=O)O)C(=O)O)N	-0.141304	0.627273	-0.629371	0.518529	0.0439891	0.0323947	IMPC_ACS_037_001___1 point	Acoustic Startle and Pre-pulse Inhibition (PPI)	% Pre-pulse inhibition - Global	IMPC_ACS_037_001	11	12	20	20	significant	Different direction	IMPC_ACS_037_001	_0022_92
7388	ONLI_0087	gctof	Hexoses	glucose	WQZGKKKJIJFFOK-VFUOTHLCSA-N	64689	C([C@@H]1[C@H]([C@@H]([C@H]([C@@H](O1)O)O)O)O)O	0.0257036	0.457143	-0.545865	0.874765	0.0442348	0.0141083	IMPC_OFD_003_001___20	Open Field	Periphery distance travelled series	IMPC_OFD_003_001.20	20	20	20	20	significant	Different direction	IMPC_OFD_003_001.20	_00140_12
31631	ONLI_0378	CSHPOS	Phosphatidylethanolamines	PE 36:4; PE 18:2-18:2;	SSCDRSKJTAQNNB-DWEQTYCFSA-N	9546812	CCCCC/C=C\C/C=C\CCCCCCCC(=O)OC[C@H](COP(=O)(O)OCCN)OC(=O)CCCCCCC/C=C\C/C=C\CCCCC	-0.0904315	-0.457143	0.484211	0.577708	0.0442348	0.032064	IMPC_OFD_010_001___1 point	Open Field	Periphery distance travelled	IMPC_OFD_010_001	20	20	20	20	significant	Different direction	IMPC_OFD_010_001	_00157_94
72322	ONLI_1017	HILICNEG	Tyrosine and derivatives	N-Acetyl-L-tyrosine	CAHKINHBCWCHCF-JTQLQIEISA-N	68310	CC(=O)N[C@@H](CC1=CC=C(C=C1)O)C(=O)O	-0.155269	0.508101	-0.473929	0.380577	0.0444875	0.0469345	IMPC_IPG_002_001___30	Intraperitoneal glucose tolerance test (IPGTT)	Blood glucose concentration	IMPC_IPG_002_001.30	20	19	16	19	significant	Different direction	IMPC_IPG_002_001.30	_00125_165
20333	ONLI_0257	CSHPOS	Cholesteryl esters	CE ( 22:4)	ITGTXSFLBABXQA-BMURBKCOSA-N	16061341	CCCCC/C=C\C/C=C\C/C=C\C/C=C\CCCCCC(=O)O[C@H]1CC[C@@]2([C@H]3CC[C@]4([C@H]([C@@H]3CC=C2C1)CC[C@@H]4[C@H](C)CCCC(C)C)C)C	-0.0224765	0.465056	-0.597969	0.891967	0.0448211	0.00535669	IMPC_GRS_003_001___1 point	Grip Strength	Body weight	IMPC_GRS_003_001	20	20	19	20	significant	Different direction	IMPC_GRS_003_001	_0092_71
8824	ONLI_0104	gctof	Beta amino acids and derivatives	beta-alanine	UCMIRNVEIXFBKS-UHFFFAOYSA-N	239	C(CN)C(=O)O	-0.0153846	0.455639	-0.464662	0.925033	0.0450045	0.04054	IMPC_OFD_007_001___1 point	Open Field	Whole arena resting time	IMPC_OFD_007_001	20	20	20	20	significant	Different direction	IMPC_OFD_007_001	_00154_11
8024	ONLI_1198	Oxylipins	Long-chain fatty acids	10-Nitrooleate	WRADPCFZZWXOTI-BMRADRMJSA-N	24836820	CCCCCCCC/C(=C\CCCCCCCC(=O)O)/[N+](=O)[O-]	-0.0695379	-0.466667	0.461654	0.674014	0.0456439	0.0419875	IMPC_ACS_037_001___1 point	Acoustic Startle and Pre-pulse Inhibition (PPI)	% Pre-pulse inhibition - Global	IMPC_ACS_037_001	19	20	20	20	significant	Different direction	IMPC_ACS_037_001	_0022_96
78254	ONLI_1164	Oxylipins	Hydroxyeicosatetraenoic acids	11-HETE	GCZRCCHPLVMMJE-RSPKXIRXSA-N	5312981	CCCCC/C=C\C=C/[C@@H](C/C=C\C/C=C/CCCC(=O)O)O	-0.28231	0.451467	-0.557352	0.0775696	0.0456999	0.010677	IMPC_OFD_018_001___1 point	Open Field	Latency to center entry	IMPC_OFD_018_001	20	20	20	20	significant	Different direction	IMPC_OFD_018_001	_00165_128
15625	ONLI_0205	CSHPOS	Triacylglycerols	TAG 56:3; TAG 18:1-18:1-20:1;	QXMHHXQBBKDSSL-QGDSHWIZSA-N	131750410	CCCCCCCC/C=C\CCCCCCCCCC(=O)OC[C@H](COC(=O)CCCCCCC/C=C\CCCCCCCC)OC(=O)CCCCCCC/C=C\CCCCCCCC	0.118221	-0.454135	0.51392	0.467508	0.0457847	0.0204508	IMPC_OFD_017_001___1 point	Open Field	Center average speed	IMPC_OFD_017_001	20	20	20	20	significant	Different direction	IMPC_OFD_017_001	_00164_30
28424	ONLI_0343	CSHPOS	Phosphosphingolipids	SMd42:1	QEDPUVGSSDPBMD-XTAIVQBESA-O	5283595	CCCCCCCCCCCCCCCCCCCCCCCC(=O)N[C@@H](COP(=O)(O)OCC[N+](C)(C)C)[C@@H](/C=C/CCCCCCCCCCCCC)O	0.0377128	0.454135	-0.482136	0.817287	0.0457847	0.031334	IMPC_ECG_006_001___1 point	Electrocardiogram (ECG)	PR	IMPC_ECG_006_001	20	20	20	20	significant	Different direction	IMPC_ECG_006_001	_0076_51
10521	ONLI_0125	gctof	Alpha hydroxy acids and derivatives	2-hydroxybutanoic acid	AFENDNXGAFYKQO-UHFFFAOYSA-N	11266	CCC(C(=O)O)O	-0.116278	0.449888	-0.446785	0.474908	0.0465574	0.0482783	IMPC_HWT_008_001___1 point	Heart Weight	Heart weight	IMPC_HWT_008_001	20	20	20	20	significant	Different direction	IMPC_HWT_008_001	_00118_28
80019	ONLI_1187	Oxylipins	Long-chain fatty acids	89-EpETrE	DBWQSCSXHFNTMO-TYAUOURKSA-N	5283203	CCCCC/C=C\C/C=C\CC1C(O1)C/C=C\CCCC(=O)O	-0.042346	0.452632	-0.517028	0.800245	0.0465754	0.0298607	IMPC_OFD_001_001___15	Open Field	Whole arena resting time series	IMPC_OFD_001_001.15	20	18	20	20	significant	Different direction	IMPC_OFD_001_001.15	_00131_94
62442	ONLI_0812	HILICPOS	Leucine and derivatives	N-Methylleucine	XJODGRWDFZVTKW-LURJTMIESA-N	2777993	CC(C)C[C@@H](C(=O)O)NC	0.0163227	0.452632	-0.493233	0.920448	0.0465754	0.0286611	IMPC_OFD_043_001___5	Open Field	Periphery average speed series	IMPC_OFD_043_001.5	20	20	20	20	significant	Different direction	IMPC_OFD_043_001.5	_00177_51
14719	ONLI_0195	CSHPOS	Alkyldiacylglycerols	TAG 54:0; TAG 16:0-18:0-20:0;	FPBBGJFVHOTVDS-GNFJTHHVSA-N	131755693	CCCCCCCCCCCCCCCCCCCC(=O)OC[C@H](COC(=O)CCCCCCCCCCCCCCC)OCCCCCCCCCCCCCCCCCC	-0.125412	0.503682	-0.576705	0.472855	0.0466864	0.0097414	IMPC_IPG_001_001___1 point	Intraperitoneal glucose tolerance test (IPGTT)	Body Weight	IMPC_IPG_001_001	20	20	16	19	significant	Different direction	IMPC_IPG_001_001	_00121_34
38219	ONLI_0446	CSHPOS	Triacylglycerols	TAG 51:0; TAG 16:0-17:0-18:0;	YVLSJEQNDDKMQI-UHFFFAOYSA-N	138309104	CCCCCCCCCCCCCCCCCC(=O)OCC(COC(=O)CCCCCCCCCCCCCCC)OC(=O)CCCCCCCCCCCCCCCC	0.0411096	-0.525	0.55418	0.820006	0.0471043	0.0187095	IMPC_OFD_003_001___20	Open Field	Periphery distance travelled series	IMPC_OFD_003_001.20	15	18	20	20	significant	Different direction	IMPC_OFD_003_001.20	_00140_98
14015	ONLI_0188	CSHPOS	Cholesterols and derivatives	Zymosterol	CGSJXLIKVBJVRY-XTGBIJOFSA-N	92746	C[C@H](CCC=C(C)C)[C@H]1CC[C@@H]2[C@@]1(CCC3=C2CC[C@@H]4[C@@]3(CC[C@@H](C4)O)C)C	0.107085	-0.451128	0.515789	0.515073	0.0473768	0.0254528	IMPC_CBC_005_001___1 point	Clinical Chemistry	Creatinine	IMPC_CBC_005_001	20	20	20	19	significant	Different direction	IMPC_CBC_005_001	_0045_23
62132	ONLI_0809	HILICPOS	Pyrimidine nucleosides	N-Acetylcytidine	NIDVTARKFBZMOT-PEBGCTIMSA-N	107461	CC(=O)NC1=NC(=O)N(C=C1)[C@H]2[C@@H]([C@@H]([C@H](O2)CO)O)O	0.122016	0.463158	-0.578431	0.478379	0.0474618	0.0168034	IMPC_HEM_031_001___1 point	Hematology	Lymphocyte differential count	IMPC_HEM_031_001	20	20	19	17	significant	Different direction	IMPC_HEM_031_001	_00109_110
10216	ONLI_0122	gctof	Phenylpropanoic acids	3-3-hydroxyphenylpropionic acid	QVWAEZJXDYOKEH-UHFFFAOYSA-N	91	C1=CC(=CC(=C1)O)CCC(=O)O	-0.0591988	0.449624	-0.556391	0.716715	0.0481889	0.0120956	IMPC_ECG_011_001___1 point	Electrocardiogram (ECG)	QTc Dispersion	IMPC_ECG_011_001	20	20	20	20	significant	Different direction	IMPC_ECG_011_001	_0081_7
73311	ONLI_1051	HILICNEG	Pyrimidine 2'-deoxyribonucleosides	Thymidine	IQFYYKKMVGJFEH-XLPZGREQSA-N	5789	CC1=CN(C(=O)NC1=O)[C@H]2C[C@@H]([C@H](O2)CO)O	0.0704453	0.44812	-0.459649	0.669015	0.0490119	0.0493356	IMPC_ACS_037_001___1 point	Acoustic Startle and Pre-pulse Inhibition (PPI)	% Pre-pulse inhibition - Global	IMPC_ACS_037_001	20	19	20	20	significant	Different direction	IMPC_ACS_037_001	_0022_91
37527	ONLI_0438	CSHPOS	Triacylglycerols	TAG 56:5; TAG 18:0-18:1-20:4;	YGKXJDDGNQKJPT-COCAYHFYSA-N	131755946	CCCCCCCCCCCCCCCCCC(=O)OC[C@@H](COC(=O)CCC/C=C\C/C=C\C/C=C\C/C=C\CCCCC)OC(=O)CCCCCCCCC/C=C\CCCCCC	0.00619137	-0.446617	0.470677	0.970069	0.0498458	0.037763	IMPC_OFD_010_001___1 point	Open Field	Periphery distance travelled	IMPC_OFD_010_001	20	20	20	20	significant	Different direction	IMPC_OFD_010_001	_00157_109
306	ONLI_0036	gctof	Medium-chain fatty acids	pelargonic acid	FBUKVWPVBMHYJY-UHFFFAOYSA-N	8158	CCCCCCCCC(=O)O	-0.599822	-0.755929	-0.808543	0.0140431	0.0300197	0.0151222	IMPC_ABR_008_001___1 point	Auditory Brain Stem Response	18kHz-evoked ABR Threshold	IMPC_ABR_008_001	20	20	8	8	significant	Different size	IMPC_ABR_008_001	_005_3
7301	ONLI_1041	HILICNEG	Monosaccharides	Sorbose	BJHIKXHVCXFQLS-OTWZMJIISA-N	6904	C([C@@H]([C@H]([C@@H](C(=O)CO)O)O)O)O	0.707985	0.845154	0.715133	0.00214927	0.00823735	0.046148	IMPC_ABR_010_001___1 point	Auditory Brain Stem Response	24kHz-evoked ABR Threshold	IMPC_ABR_010_001	20	19	8	8	significant	Different size	IMPC_ABR_010_001	_006_62
183	ONLI_0023	gctof	Pentoses	ribose	HMFHBZSHGGEWLO-SOOFDHNKSA-N	5779	C([C@@H]1[C@H]([C@H](C(O1)O)O)O)O	-0.501127	-0.498871	-0.513361	0.000988496	0.0251492	0.0206118	IMPC_ACS_002_001___1 point	Acoustic Startle and Pre-pulse Inhibition (PPI)	Response amplitude - PP1	IMPC_ACS_002_001	20	20	20	20	significant	Different size	IMPC_ACS_002_001	_009_3
5872	ONLI_0750	HILICPOS	Dipeptides	Lys-Val	YQAIUOWPSUOINN-UHFFFAOYSA-N	140709	CC(C)C(C(=O)O)NC(=O)C(CCCCN)N	-0.547427	-0.521478	-0.529921	0.00025644	0.0183707	0.0162507	IMPC_ACS_002_001___1 point	Acoustic Startle and Pre-pulse Inhibition (PPI)	Response amplitude - PP1	IMPC_ACS_002_001	20	20	20	20	significant	Different size	IMPC_ACS_002_001	_009_136
5931	ONLI_0757	HILICPOS	L-alpha-amino acids	NEPSILON,NEPSILON,NEPSILON-TRIMETHYLLYSINE	MXNRLFUSFKVQSK-QMMMGPOBSA-N	440120	C[N+](C)(C)CCCC[C@@H](C(=O)[O-])N	-0.499719	-0.521478	-0.59842	0.00102691	0.0183707	0.0053132	IMPC_ACS_002_001___1 point	Acoustic Startle and Pre-pulse Inhibition (PPI)	Response amplitude - PP1	IMPC_ACS_002_001	20	20	20	20	significant	Different size	IMPC_ACS_002_001	_009_137
6462	ONLI_0843	HILICPOS	Cholines	Choline	OEYIOHPDSNJKLS-UHFFFAOYSA-N	305	C[N+](C)(C)CCO	-0.555785	-0.595329	-0.508845	0.000196744	0.00561748	0.0219498	IMPC_ACS_002_001___1 point	Acoustic Startle and Pre-pulse Inhibition (PPI)	Response amplitude - PP1	IMPC_ACS_002_001	20	20	20	20	significant	Different size	IMPC_ACS_002_001	_009_149
27	ONLI_0033	gctof	Phenethylamines	phenylethylamine	BHHGXPLMPWCGHP-UHFFFAOYSA-N	1001	C1=CC=C(C=C1)CCN	-0.552081	-0.522268	-0.544566	0.000221455	0.0181636	0.0130416	IMPC_ACS_003_001___1 point	Acoustic Startle and Pre-pulse Inhibition (PPI)	Response amplitude - PP2	IMPC_ACS_003_001	20	20	20	20	significant	Different size	IMPC_ACS_003_001	_0010_5
5411	ONLI_0065	gctof	Arylsulfates	indoxyl sulfate	BXFFHSIDQOFMLE-UHFFFAOYSA-N	10258	C1=CC=C2C(=C1)C(=CN2)OS(=O)(=O)O	-0.51592	-0.455852	-0.468597	0.000655759	0.0433829	0.0371603	IMPC_ACS_003_001___1 point	Acoustic Startle and Pre-pulse Inhibition (PPI)	Response amplitude - PP2	IMPC_ACS_003_001	20	20	20	20	significant	Different size	IMPC_ACS_003_001	_0010_15
70	ONLI_0082	gctof	Sugar alcohols	glycerol	PEDCQBHIVMGVHV-UHFFFAOYSA-N	753	C(C(CO)O)O	0.382455	0.504909	0.570891	0.014869	0.0231712	0.00856526	IMPC_ACS_003_001___1 point	Acoustic Startle and Pre-pulse Inhibition (PPI)	Response amplitude - PP2	IMPC_ACS_003_001	20	20	20	20	significant	Different size	IMPC_ACS_003_001	_0010_20
120	ONLI_0167	CSHPOS	Phosphatidylcholines	PC 38:4; PC 18:0-20:4;	HAKKEJDMTIQLJH-UGKDIXSWSA-N	53478701	CCCCCCCCCCCCCCCCCC(=O)OC[C@H](COP(=O)([O-])OCC[N+](C)(C)C)OC(=O)CCCCCC/C=C\C/C=C\C/C=C\C/C=C\CC	0.271908	0.454343	0.599474	0.089638	0.04417	0.00521259	IMPC_ACS_003_001___1 point	Acoustic Startle and Pre-pulse Inhibition (PPI)	Response amplitude - PP2	IMPC_ACS_003_001	20	20	20	20	significant	Different size	IMPC_ACS_003_001	_0010_32
1581	ONLI_0207	CSHPOS	Phosphatidylcholines	PC(18:0/22:6(4Z,7Z,10Z,13Z,16Z,19Z)	FAUYAENFVCNTAL-PFFNLMTBSA-N	24778876	CCCCCCCCCCCCCCCCCC(=O)OC[C@H](COP(=O)([O-])OCC[N+](C)(C)C)OC(=O)CC/C=C\C/C=C\C/C=C\C/C=C\C/C=C\C/C=C\CC	0.419086	0.550193	0.624295	0.00711023	0.0119538	0.003259	IMPC_ACS_003_001___1 point	Acoustic Startle and Pre-pulse Inhibition (PPI)	Response amplitude - PP2	IMPC_ACS_003_001	20	20	20	20	significant	Different size	IMPC_ACS_003_001	_0010_37
1962	ONLI_0249	CSHPOS	Phosphatidylcholines	PC 16:0-22:6	IESVDEZGAHUQJU-ZLBXKVHBSA-N	6441886	CCCCCCCCCCCCCCCC(=O)OC[C@H](COP(=O)([O-])OCC[N+](C)(C)C)OC(=O)CC/C=C\C/C=C\C/C=C\C/C=C\C/C=C\C/C=C\CC	0.617264	0.632457	0.605491	2.21033e-05	0.00276867	0.00466776	IMPC_ACS_003_001___1 point	Acoustic Startle and Pre-pulse Inhibition (PPI)	Response amplitude - PP2	IMPC_ACS_003_001	20	20	20	20	significant	Different size	IMPC_ACS_003_001	_0010_45
2322	ONLI_0287	CSHPOS	Phosphosphingolipids	N-Octadecanoylsphing-4-enine-1-phosphocholine	LKQLRGMMMAHREN-YJFXYUILSA-N	6453725	CCCCCCCCCCCCCCCCCC(=O)N[C@@H](COP(=O)([O-])OCC[N+](C)(C)C)[C@@H](/C=C/CCCCCCCCCCCCC)O	0.0193482	0.473211	0.521249	0.905672	0.0350874	0.0184314	IMPC_ACS_003_001___1 point	Acoustic Startle and Pre-pulse Inhibition (PPI)	Response amplitude - PP2	IMPC_ACS_003_001	20	20	20	20	significant	Different size	IMPC_ACS_003_001	_0010_55
233	ONLI_0288	CSHPOS	Phosphosphingolipids	SMd36:1	LKQLRGMMMAHREN-YJFXYUILSA-O	5283588	CCCCCCCCCCCCCCCCCC(=O)N[C@@H](COP(=O)(O)OCC[N+](C)(C)C)[C@@H](/C=C/CCCCCCCCCCCCC)O	-0.0390721	0.566042	0.519744	0.81082	0.00927849	0.0188323	IMPC_ACS_003_001___1 point	Acoustic Startle and Pre-pulse Inhibition (PPI)	Response amplitude - PP2	IMPC_ACS_003_001	20	20	20	20	significant	Different size	IMPC_ACS_003_001	_0010_56
2612	ONLI_0320	CSHPOS	Phosphatidylcholines	PC36:4 A	NKQPOVROGSWLTO-NVPMBMBWSA-N	52922783	CCCCCCCC/C=C\CCCCCCCC(=O)O[C@H](COC(=O)CCCC/C=C\C/C=C\C/C=C\CCCCC)COP(=O)([O-])OCC[N+](C)(C)C	0.612004	0.48906	0.661151	2.71333e-05	0.028645	0.00150307	IMPC_ACS_003_001___1 point	Acoustic Startle and Pre-pulse Inhibition (PPI)	Response amplitude - PP2	IMPC_ACS_003_001	20	20	20	20	significant	Different size	IMPC_ACS_003_001	_0010_62
408	ONLI_0486	CSHNEG	Long-chain fatty acids	FA 20:3 b	HOBAELRKJCKHQD-QNEBEIHSSA-N	5280581	CCCCC/C=C\C/C=C\C/C=C\CCCCCCC(=O)O	0.514324	0.521513	0.52877	0.000686074	0.0183616	0.0165276	IMPC_ACS_003_001___1 point	Acoustic Startle and Pre-pulse Inhibition (PPI)	Response amplitude - PP2	IMPC_ACS_003_001	20	20	20	20	significant	Different size	IMPC_ACS_003_001	_0010_117
5491	ONLI_0673	CSHNEG	Phosphatidylcholines	PC 40:6	FYVNIFOYDIIODX-KNKJIUSSSA-N	24778900	CCCCCC/C=C\CCCCCCCCCC(=O)OC[C@H](COP(=O)([O-])OCC[N+](C)(C)C)OC(=O)CCCCC/C=C\C/C=C\C/C=C\C/C=C\C/C=C\CC	0.388654	0.560004	0.588191	0.0131965	0.0102333	0.00637541	IMPC_ACS_003_001___1 point	Acoustic Startle and Pre-pulse Inhibition (PPI)	Response amplitude - PP2	IMPC_ACS_003_001	20	20	20	20	significant	Different size	IMPC_ACS_003_001	_0010_180
313	ONLI_0039	gctof	Long-chain fatty acids	palmitic acid	IPCSVZSSVZVIGE-UHFFFAOYSA-N	985	CCCCCCCCCCCCCCCC(=O)O	0.530394	0.512782	0.490226	0.000521322	0.0222752	0.0297617	IMPC_ACS_006_001___1 point	Acoustic Startle and Pre-pulse Inhibition (PPI)	Response amplitude - S	IMPC_ACS_006_001	20	20	20	20	significant	Different size	IMPC_ACS_006_001	_0013_5
716	ONLI_0008	gctof	Pyrimidones	uracil	ISAKRJDGNUQOIC-UHFFFAOYSA-N	1174	C1=CNC(=O)NC1=O	0.449313	0.516736	0.463158	0.00363227	0.0196552	0.0412588	IMPC_ACS_008_001___1 point	Acoustic Startle and Pre-pulse Inhibition (PPI)	Response amplitude - PP2_S	IMPC_ACS_008_001	20	20	20	20	significant	Different size	IMPC_ACS_008_001	_0015_1
3525	ONLI_0414	CSHPOS	1-alkyl,2-acylglycerophosphates	PCp-42:3 or PC o-42:4	CQZWFFADRVQCKP-SANZOQRGSA-N	52929632	CCCCCCCCCCCCCCCCCCCCOC[C@H](COP(=O)(O)O)OC(=O)CCCCC/C=C\C/C=C\C/C=C\C/C=C\CCCCC	-0.44359	-0.449793	-0.548872	0.00414405	0.0466093	0.0135073	IMPC_ACS_008_001___1 point	Acoustic Startle and Pre-pulse Inhibition (PPI)	Response amplitude - PP2_S	IMPC_ACS_008_001	20	20	20	20	significant	Different size	IMPC_ACS_008_001	_0015_32
7111	ONLI_0968	HILICNEG	Medium-chain hydroxy acids and derivatives	Galactonic acid	RGHNJXZEOKUKBD-MGCNEYSASA-N	128869	C([C@H]([C@@H]([C@@H]([C@H](C(=O)O)O)O)O)O)O	0.472573	0.44528	0.572695	0.00361018	0.0491298	0.0204154	IMPC_ACS_010_001___1 point	Acoustic Startle and Pre-pulse Inhibition (PPI)	Response amplitude - PP4_S	IMPC_ACS_010_001	20	16	20	20	significant	Different size	IMPC_ACS_010_001	_0017_49
3021	ONLI_0362	CSHPOS	Cholesteryl esters	CE (18:1)	RJECHNNFRHZQKU-RMUVNZEASA-N	5283632	CCCCCCCC/C=C\CCCCCCCC(=O)O[C@H]1CC[C@@]2([C@H]3CC[C@]4([C@H]([C@@H]3CC=C2C1)CC[C@@H]4[C@H](C)CCCC(C)C)C)C	-0.385929	-0.44812	-0.466165	0.0144409	0.0490119	0.0398311	IMPC_ACS_033_001___1 point	Acoustic Startle and Pre-pulse Inhibition (PPI)	% Pre-pulse inhibition - PPI1	IMPC_ACS_033_001	20	20	20	20	significant	Different size	IMPC_ACS_033_001	_0018_26
3594	ONLI_0421	CSHPOS	Cholesteryl esters	CE ( 24:1)	PUKCXSHDVCMMAN-FYGHJIOESA-N	53477888	CCCCCCCC/C=C\CCCCCCCCCCCCCC(=O)O[C@H]1CC[C@@]2([C@H]3CC[C@]4([C@H]([C@@H]3CC=C2C1)CC[C@@H]4[C@H](C)CCCC(C)C)C)C	-0.703896	-0.721212	-0.736364	0.000530711	0.0241946	0.0133754	IMPC_ACS_033_001___1 point	Acoustic Startle and Pre-pulse Inhibition (PPI)	% Pre-pulse inhibition - PPI1	IMPC_ACS_033_001	10	11	20	20	significant	Different size	IMPC_ACS_033_001	_0018_35
5003	ONLI_0609	CSHNEG	1-alkyl,2-acylglycero-3-phosphocholines	PC 36:2e; PC 18:0e/18:2;	LMGTVCKIUNTOEP-HJTCUGKVSA-N	6443070	CCCCCCCCCCCCCCCCCCOC[C@H](COP(=O)([O-])OCC[N+](C)(C)C)OC(=O)CCCCCCC/C=C\C/C=C\CCCCC	0.301876	0.479699	0.514286	0.0587409	0.0338819	0.021836	IMPC_ACS_033_001___1 point	Acoustic Startle and Pre-pulse Inhibition (PPI)	% Pre-pulse inhibition - PPI1	IMPC_ACS_033_001	20	20	20	20	significant	Different size	IMPC_ACS_033_001	_0018_59
2232	ONLI_0277	CSHPOS	Phosphatidylcholines	PC38:3	KNNHXKQRTYEWCA-HYYWERRFSA-N	53478919	CCCCCC/C=C\CCCCCCCCCC(=O)O[C@H](COC(=O)CCCCCCCCC/C=C\C/C=C\CCCCC)COP(=O)([O-])OCC[N+](C)(C)C	0.445216	0.446617	0.470677	0.00432652	0.0498458	0.037763	IMPC_BWT_001_001___1 point	Body Weight	Body weight	IMPC_BWT_001_001	20	20	20	20	significant	Different size	IMPC_BWT_001_001	_0023_36
4025	ONLI_0479	CSHNEG	Lineolic acids and derivatives	FA 18:3	DTOSIQBPPRVQHS-PDBXOOCHSA-N	5280934	CC/C=C\C/C=C\C/C=C\CCCCCCCC(=O)O	0.369804	0.502941	0.486571	0.0313484	0.0493467	0.0405948	IMPC_BWT_008_001___10	Body Weight	Body weight curve	IMPC_BWT_008_001.10	20	20	16	18	significant	Different size	IMPC_BWT_008_001.10	_0024_140
4148	ONLI_0493	CSHNEG	Very long-chain fatty acids	FA 22:1	DPUOLQHDNGRHBS-KTKRTIGZSA-N	5281116	CCCCCCCC/C=C\CCCCCCCCCCCC(=O)O	0.799511	0.579412	0.498967	1.41945e-08	0.0207906	0.0350349	IMPC_BWT_008_001___10	Body Weight	Body weight curve	IMPC_BWT_008_001.10	20	20	16	18	significant	Different size	IMPC_BWT_008_001.10	_0024_149
55116	ONLI_0675	CSHNEG	Phosphatidylcholines	PC 40:4	UAVRPIXHIHJERN-CBTSKTMBSA-N	24779048	CCCCCCCCCCCCCCCCCCCC(=O)OC[C@H](COP(=O)([O-])OCC[N+](C)(C)C)OC(=O)CCC/C=C\C/C=C\C/C=C\C/C=C\CCCCC	0.85398	0.479091	0.570691	3.54786e-11	0.0442607	0.0149716	IMPC_BWT_008_001___11	Body Weight	Body weight curve	IMPC_BWT_008_001.11	20	20	18	18	significant	Different size	IMPC_BWT_008_001.11	_0025_198
7912	ONLI_0093	gctof	Fatty alcohols	dodecanol	LQZZUXJYWNFBMV-UHFFFAOYSA-N	8193	CCCCCCCCCCCCO	0.121469	0.869305	0.669003	0.590243	0.00108699	0.0173586	IMPC_BWT_008_001___12	Body Weight	Body weight curve	IMPC_BWT_008_001.12	20	20	10	12	significant	Different size	IMPC_BWT_008_001.12	_0026_18
6011	ONLI_0772	HILICPOS	Dialkylamines	Spermidine	ATHGHQPFGPMSJY-UHFFFAOYSA-N	1102	C(CCNCCCN)CN	0.413559	0.662617	0.637479	0.0557224	0.0368064	0.0257544	IMPC_BWT_008_001___12	Body Weight	Body weight curve	IMPC_BWT_008_001.12	20	20	10	12	significant	Different size	IMPC_BWT_008_001.12	_0026_169
55117	ONLI_0675	CSHNEG	Phosphatidylcholines	PC 40:4	UAVRPIXHIHJERN-CBTSKTMBSA-N	24779048	CCCCCCCCCCCCCCCCCCCC(=O)OC[C@H](COP(=O)([O-])OCC[N+](C)(C)C)OC(=O)CCC/C=C\C/C=C\C/C=C\C/C=C\CCCCC	0.810769	0.496628	0.472674	1.18015e-09	0.0425718	0.0353239	IMPC_BWT_008_001___13	Body Weight	Body weight curve	IMPC_BWT_008_001.13	20	20	17	20	significant	Different size	IMPC_BWT_008_001.13	_0027_162
7974	ONLI_1182	Oxylipins	Long-chain fatty acids	15,16-EpODE	HKSDVVJONLXYKL-OHPMOLHNSA-N	16061062	CCC1C(O1)C/C=C\C/C=C\CCCCCCCC(=O)O	0.316688	0.640098	0.465135	0.0561715	0.00564593	0.0387772	IMPC_BWT_008_001___13	Body Weight	Body weight curve	IMPC_BWT_008_001.13	20	20	17	20	significant	Different size	IMPC_BWT_008_001.13	_0027_212
3668	ONLI_0428	CSHPOS	1-acyl,2-(1Z-alkenyl)-glycerophosphocholines	PCo-40:7 A	XUVCLJCZWPTAIO-OAKHYACESA-N	53479405	CCCCCCCC/C=C\CCCCCC/C=C\OC(COC(=O)CCCCC/C=C\C/C=C\C/C=C\C/C=C\C/C=C\CC)COP(=O)([O-])OCC[N+](C)(C)C	0.798754	0.652895	0.499694	1.21896e-07	0.0155495	0.0411125	IMPC_BWT_008_001___14	Body Weight	Body weight curve	IMPC_BWT_008_001.14	20	20	13	17	significant	Different size	IMPC_BWT_008_001.14	_0028_138
4181	ONLI_0497	CSHNEG	Medium-chain fatty acids	FAHFA 24:0; FAHFA 16:0/8:0;	JFADBWKNFGCNQI-UHFFFAOYSA-N	138184454	CCCCCCCCCCCCCCCC(=O)OC(CCC)CCCC(=O)O	0.215494	0.595044	0.532843	0.252766	0.031928	0.0276461	IMPC_BWT_008_001___14	Body Weight	Body weight curve	IMPC_BWT_008_001.14	20	20	13	17	significant	Different size	IMPC_BWT_008_001.14	_0028_167
41413	ONLI_0493	CSHNEG	Very long-chain fatty acids	FA 22:1	DPUOLQHDNGRHBS-KTKRTIGZSA-N	5281116	CCCCCCCC/C=C\CCCCCCCCCCCC(=O)O	0.800702	0.603694	0.526961	2.20712e-08	0.013278	0.0318066	IMPC_BWT_008_001___15	Body Weight	Body weight curve	IMPC_BWT_008_001.15	20	20	16	17	significant	Different size	IMPC_BWT_008_001.15	_0029_141
46412	ONLI_0569	CSHNEG	Sphingomyelins	SM d34:2; SM d18:2/16:0;	YLWSJLLZUHSIEA-CKSUKHGVSA-N	52931235	CCCCCCCCCCCCCCCC(=O)N[C@@H](COP(=O)([O-])OCC[N+](C)(C)C)[C@@H](/C=C/CCCCCCCC/C=C\CCC)O	0.844842	0.621406	0.605392	6.31261e-10	0.0101845	0.0115927	IMPC_BWT_008_001___15	Body Weight	Body weight curve	IMPC_BWT_008_001.15	20	20	16	17	significant	Different size	IMPC_BWT_008_001.15	_0029_165
1587	ONLI_0207	CSHPOS	Phosphatidylcholines	PC(18:0/22:6(4Z,7Z,10Z,13Z,16Z,19Z)	FAUYAENFVCNTAL-PFFNLMTBSA-N	24778876	CCCCCCCCCCCCCCCCCC(=O)OC[C@H](COP(=O)([O-])OCC[N+](C)(C)C)OC(=O)CC/C=C\C/C=C\C/C=C\C/C=C\C/C=C\C/C=C\CC	0.130658	0.66961	0.528571	0.483558	0.00454745	0.0454251	IMPC_BWT_008_001___16	Body Weight	Body weight curve	IMPC_BWT_008_001.16	20	20	16	15	significant	Different size	IMPC_BWT_008_001.16	_0030_41
17810	ONLI_0229	CSHPOS	1-(1Z-alkenyl),2-acyl-glycerophosphocholines	PCo-38:4 A	GWBOVQHRCURSPU-QMFAPAEZSA-N	53480815	CCCCCCCC/C=C\CCCCCC/C=C\OC[C@H](COP(=O)([O-])OCC[N+](C)(C)C)OC(=O)CCCCCCCCC/C=C\C/C=C\CCCCC	0.434721	0.67844	0.525	0.0145305	0.00386334	0.0471043	IMPC_BWT_008_001___16	Body Weight	Body weight curve	IMPC_BWT_008_001.16	20	20	16	15	significant	Different size	IMPC_BWT_008_001.16	_0030_49
21713	ONLI_0271	CSHPOS	Ceramides	Cer d40:1	CJROVRTUSFQVMR-GVOPMEMSSA-N	5283570	CCCCCCCCCCCCCCCCCCCCCCCCCC(=O)N[C@@H](CO)[C@@H](/C=C/CCCCCCCCCCCCC)O	0.811574	0.51067	0.546429	3.03414e-08	0.043245	0.0377006	IMPC_BWT_008_001___16	Body Weight	Body weight curve	IMPC_BWT_008_001.16	20	20	16	15	significant	Different size	IMPC_BWT_008_001.16	_0030_60
2865	ONLI_0345	CSHPOS	Triacylglycerols	SMd34:0	ANBFFIILUQJIQL-XFGXVVNZSA-N	9544103	CCCCCCCCCCCCCCCCC(=O)OC[C@H](COC(=O)CCCCCCC/C=C\CCCCCCCC)OC(=O)CCCCCCC/C=C\CCCCCCCC	0.258091	0.544518	0.585714	0.16097	0.0291937	0.0242547	IMPC_BWT_008_001___16	Body Weight	Body weight curve	IMPC_BWT_008_001.16	20	20	16	15	significant	Different size	IMPC_BWT_008_001.16	_0030_90
3779	ONLI_0440	CSHPOS	Phosphosphingolipids	SMd34:2	OAHFTKWSJGVMTG-MBIABJCFSA-N	52931145	CCCCCCCCCCCCC/C=C/[C@H]([C@H](COP(=O)([O-])OCC[N+](C)(C)C)NC(=O)CCCCCCC/C=C\CCCCCC)O	0.824882	0.71376	0.55	1.14937e-08	0.00190106	0.0362844	IMPC_BWT_008_001___16	Body Weight	Body weight curve	IMPC_BWT_008_001.16	20	20	16	15	significant	Different size	IMPC_BWT_008_001.16	_0030_125
37913	ONLI_0442	CSHPOS	1-(1Z-alkenyl),2-acyl-glycerophosphocholines	PCo-38:5 A	YPAPIRJFGNBODV-AMFPDOHCSA-N	53480715	CCCCCCCCCCCCCCCC/C=C\OCC(COP(=O)([O-])OCC[N+](C)(C)C)OC(=O)CCCCCC/C=C\C/C=C\C/C=C\C/C=C\CC	0.77407	0.55482	0.557143	3.25068e-07	0.0257031	0.0335747	IMPC_BWT_008_001___16	Body Weight	Body weight curve	IMPC_BWT_008_001.16	20	20	16	15	significant	Different size	IMPC_BWT_008_001.16	_0030_126
4276	ONLI_0516	CSHNEG	1-acyl-sn-glycero-3-phosphocholines	LPC 18:0	IHNKQIMGVNPMTC-RUZDIDTESA-N	497299	CCCCCCCCCCCCCCCCCC(=O)OC[C@H](COP(=O)([O-])OCC[N+](C)(C)C)O	0.0288336	0.671082	0.567857	0.877631	0.00442715	0.0298045	IMPC_BWT_008_001___16	Body Weight	Body weight curve	IMPC_BWT_008_001.16	20	20	16	15	significant	Different size	IMPC_BWT_008_001.16	_0030_146
46413	ONLI_0569	CSHNEG	Sphingomyelins	SM d34:2; SM d18:2/16:0;	YLWSJLLZUHSIEA-CKSUKHGVSA-N	52931235	CCCCCCCCCCCCCCCC(=O)N[C@@H](COP(=O)([O-])OCC[N+](C)(C)C)[C@@H](/C=C/CCCCCCCC/C=C\CCC)O	0.827906	0.621045	0.532143	9.11439e-09	0.0102413	0.0437917	IMPC_BWT_008_001___16	Body Weight	Body weight curve	IMPC_BWT_008_001.16	20	20	16	15	significant	Different size	IMPC_BWT_008_001.16	_0030_159
6124	ONLI_0793	HILICPOS	Proline and derivatives	3-Hydroxyproline	BJBUEDPLEOHJGE-BKLSDQPFSA-N	150779	C1CN[C@@H](C1O)C(=O)O	0.106494	-0.632353	-0.634675	0.547469	0.0102161	0.00568411	IMPC_BWT_008_001___4	Body Weight	Body weight curve	IMPC_BWT_008_001.4	20	20	16	18	significant	Different size	IMPC_BWT_008_001.4	_0031_280
31813	ONLI_0380	CSHPOS	1-acyl,2-alkylglycero-3-phosphocholines	PCo-32:0	SVWBXNAUENUONE-LDLOPFEMSA-N	173570	CCCCCCCCCCCCCCCCO[C@H](COC(=O)CCCCCCCCCCCCCCC)COP(=O)([O-])OCC[N+](C)(C)C	0.82437	0.517157	0.521156	1.81168e-07	0.0355851	0.0284109	IMPC_BWT_008_001___6	Body Weight	Body weight curve	IMPC_BWT_008_001.6	20	20	17	18	significant	Different size	IMPC_BWT_008_001.6	_0033_111
32312	ONLI_0385	CSHPOS	1-acyl-sn-glycero-3-phosphocholines	LPC 20:0	UATOAILWGVYRQS-HHHXNRCGSA-N	24779473	CCCCCCCCCCCCCCCCCCCC(=O)OC[C@H](COP(=O)([O-])OCC[N+](C)(C)C)O	0.888515	0.580882	0.568627	0	0.0162642	0.0154029	IMPC_BWT_008_001___6	Body Weight	Body weight curve	IMPC_BWT_008_001.6	20	20	17	18	significant	Different size	IMPC_BWT_008_001.6	_0033_112
32314	ONLI_0385	CSHPOS	1-acyl-sn-glycero-3-phosphocholines	LPC 20:0	UATOAILWGVYRQS-HHHXNRCGSA-N	24779473	CCCCCCCCCCCCCCCCCCCC(=O)OC[C@H](COP(=O)([O-])OCC[N+](C)(C)C)O	0.898387	0.571429	0.649007	3.77831e-11	0.0448907	0.00652448	IMPC_BWT_008_001___8	Body Weight	Body weight curve	IMPC_BWT_008_001.8	20	20	13	16	significant	Different size	IMPC_BWT_008_001.8	_0035_104
1589	ONLI_0207	CSHPOS	Phosphatidylcholines	PC(18:0/22:6(4Z,7Z,10Z,13Z,16Z,19Z)	FAUYAENFVCNTAL-PFFNLMTBSA-N	24778876	CCCCCCCCCCCCCCCCCC(=O)OC[C@H](COP(=O)([O-])OCC[N+](C)(C)C)OC(=O)CC/C=C\C/C=C\C/C=C\C/C=C\C/C=C\C/C=C\CC	0.14739	0.553752	0.581596	0.390986	0.0139004	0.0143281	IMPC_BWT_008_001___9	Body Weight	Body weight curve	IMPC_BWT_008_001.9	20	20	19	17	significant	Different size	IMPC_BWT_008_001.9	_0036_48
19619	ONLI_0249	CSHPOS	Phosphatidylcholines	PC 16:0-22:6	IESVDEZGAHUQJU-ZLBXKVHBSA-N	6441886	CCCCCCCCCCCCCCCC(=O)OC[C@H](COP(=O)([O-])OCC[N+](C)(C)C)OC(=O)CC/C=C\C/C=C\C/C=C\C/C=C\C/C=C\C/C=C\CC	0.791787	0.594998	0.575461	8.87095e-09	0.00720328	0.0156471	IMPC_BWT_008_001___9	Body Weight	Body weight curve	IMPC_BWT_008_001.9	20	20	19	17	significant	Different size	IMPC_BWT_008_001.9	_0036_67
26121	ONLI_0320	CSHPOS	Phosphatidylcholines	PC36:4 A	NKQPOVROGSWLTO-NVPMBMBWSA-N	52922783	CCCCCCCC/C=C\CCCCCCCC(=O)O[C@H](COC(=O)CCCC/C=C\C/C=C\C/C=C\CCCCC)COP(=O)([O-])OCC[N+](C)(C)C	0.817146	0.573936	0.58405	1.20305e-09	0.0101818	0.0138257	IMPC_BWT_008_001___9	Body Weight	Body weight curve	IMPC_BWT_008_001.9	20	20	19	17	significant	Different size	IMPC_BWT_008_001.9	_0036_93
31816	ONLI_0380	CSHPOS	1-acyl,2-alkylglycero-3-phosphocholines	PCo-32:0	SVWBXNAUENUONE-LDLOPFEMSA-N	173570	CCCCCCCCCCCCCCCCO[C@H](COC(=O)CCCCCCCCCCCCCCC)COP(=O)([O-])OCC[N+](C)(C)C	0.794233	0.604651	0.482209	7.40583e-09	0.00609887	0.0499657	IMPC_BWT_008_001___9	Body Weight	Body weight curve	IMPC_BWT_008_001.9	20	20	19	17	significant	Different size	IMPC_BWT_008_001.9	_0036_120
6428	ONLI_0075	gctof	Sugar alcohols	hexitol	FBPFZTCFMRRESA-GUCUJZIJSA-N	11850	C([C@H]([C@@H]([C@@H]([C@H](CO)O)O)O)O)O	-0.359574	-0.492769	-0.507353	0.0338756	0.0377364	0.0397044	IMPC_CAL_001_001___1 point	Indirect Calorimetry	Body weight before experiment	IMPC_CAL_001_001	20	20	18	17	significant	Different size	IMPC_CAL_001_001	_0037_14
28611	ONLI_0345	CSHPOS	Triacylglycerols	SMd34:0	ANBFFIILUQJIQL-XFGXVVNZSA-N	9544103	CCCCCCCCCCCCCCCCC(=O)OC[C@H](COC(=O)CCCCCCC/C=C\CCCCCCCC)OC(=O)CCCCCCC/C=C\CCCCCCCC	0.114582	0.471075	0.507353	0.512197	0.0484643	0.0397044	IMPC_CAL_001_001___1 point	Indirect Calorimetry	Body weight before experiment	IMPC_CAL_001_001	20	20	18	17	significant	Different size	IMPC_CAL_001_001	_0037_100
2669	ONLI_0325	CSHPOS	Phosphatidylcholines	PC16:0/18:2	NVWYLRLKCCCUBZ-UOBGCCIWSA-N	134753865	CCCCCCCCCCCCCCCC(=O)OC[C@H](COP(=O)([O-])OCC[N+](C)(C)C)OC(=O)CCCC/C=C/C/C=C/CCCCCCCC	-0.727171	-0.616099	-0.541667	2.04808e-06	0.00767423	0.0267353	IMPC_CAL_002_001___1 point	Indirect Calorimetry	Body weight after experiment	IMPC_CAL_002_001	20	20	18	17	significant	Different size	IMPC_CAL_002_001	_0038_55
5867	ONLI_0749	HILICPOS	Dipeptides	Lys-Gly	HGNRJCINZYHNOU-UHFFFAOYSA-N	259320	C(CCN)CC(C(=O)NCC(=O)O)N	-0.311646	-0.717234	-0.629902	0.0683862	0.00115215	0.00806083	IMPC_CAL_002_001___1 point	Indirect Calorimetry	Body weight after experiment	IMPC_CAL_002_001	20	20	18	17	significant	Different size	IMPC_CAL_002_001	_0038_144
6322	ONLI_0821	HILICPOS	Gamma amino acids and derivatives	4-Guanidinobutyric acid	TUHVEAJXIMEOSA-UHFFFAOYSA-N	500	C(CC(=O)O)CN=C(N)N	0.58042	0.785714	1	0.0520862	0.0480159	0.0166667	IMPC_CAL_008_001___1 point	Indirect Calorimetry	Total food intake	IMPC_CAL_008_001	20	20	7	5	significant	Different size	IMPC_CAL_008_001	_0039_30
7920	ONLI_0093	gctof	Fatty alcohols	dodecanol	LQZZUXJYWNFBMV-UHFFFAOYSA-N	8193	CCCCCCCCCCCCO	-0.57535	-0.581011	-0.578431	0.000381191	0.0129578	0.0168034	IMPC_CAL_017_001___1 point	Indirect Calorimetry	Respiratory Exchange Ratio	IMPC_CAL_017_001	20	20	18	17	significant	Different size	IMPC_CAL_017_001	_0040_3
12117	ONLI_0168	CSHPOS	Phosphatidylcholines	PC36:1	ATHVAWFAEPLPPQ-VRDBWYNSSA-N	24778825	CCCCCCCCCCCCCCCCCC(=O)OC[C@H](COP(=O)([O-])OCC[N+](C)(C)C)OC(=O)CCCCCCC/C=C\CCCCCCCC	0.519989	0.55982	0.515619	0.000583845	0.0102636	0.0199676	IMPC_CBC_001_001___1 point	Clinical Chemistry	Sodium	IMPC_CBC_001_001	20	20	20	20	significant	Different size	IMPC_CBC_001_001	_0041_11
1833	ONLI_0023	gctof	Pentoses	ribose	HMFHBZSHGGEWLO-SOOFDHNKSA-N	5779	C([C@@H]1[C@H]([C@H](C(O1)O)O)O)O	0.647799	0.665162	0.647835	6.22311e-06	0.00137312	0.00201091	IMPC_CBC_002_001___1 point	Clinical Chemistry	Potassium	IMPC_CBC_002_001	20	20	20	20	significant	Different size	IMPC_CBC_002_001	_0042_4
26521	ONLI_0324	CSHPOS	1-alkyl,2-acylglycerophosphoethanolamines	PE 36:5e; PE 16:0e/20:5;	NTBDNAWCQLUDHG-CEGBOXLASA-N	52925030	CCCCCCCCCCCCCCCCOC[C@H](COP(=O)(O)OCCN)OC(=O)CCC/C=C\C/C=C\C/C=C\C/C=C\C/C=C\CC	-0.415939	-0.659895	-0.462524	0.00759939	0.00154583	0.0400324	IMPC_CBC_002_001___1 point	Clinical Chemistry	Potassium	IMPC_CBC_002_001	20	20	20	20	significant	Different size	IMPC_CBC_002_001	_0042_61
32819	ONLI_0390	CSHPOS	1-acyl-sn-glycero-3-phosphocholines	LPC 22:0	UIINDYGXBHJQHX-GDLZYMKVSA-N	24779479	CCCCCCCCCCCCCCCCCCCCCC(=O)OC[C@H](COP(=O)([O-])OCC[N+](C)(C)C)O	-0.137144	-0.463507	-0.445952	0.398741	0.0395566	0.0487482	IMPC_CBC_002_001___1 point	Clinical Chemistry	Potassium	IMPC_CBC_002_001	20	20	20	20	significant	Different size	IMPC_CBC_002_001	_0042_72
3574	ONLI_0419	CSHPOS	Triacylglycerols	TAG 58:11; TAG 18:2-18:3-22:6;	CCWQXSQVMPACON-RXTLCQEBSA-N	131763405	CCCCC/C=C\C/C=C\CCCCCCCC(=O)OC[C@@H](COC(=O)CC/C=C\C/C=C\C/C=C\C/C=C\C/C=C\C/C=C\CC)OC(=O)CCCCCCC/C=C\C/C=C\C/C=C\CC	-0.538909	-0.623025	-0.448965	0.000333573	0.0033414	0.0470642	IMPC_CBC_002_001___1 point	Clinical Chemistry	Potassium	IMPC_CBC_002_001	20	20	20	20	significant	Different size	IMPC_CBC_002_001	_0042_76
39315	ONLI_0457	CSHPOS	1-(1Z-alkenyl),2-acylglycerophosphoethanolamines	PEo-38:5/or PEp-38:4	ZTZQZGHJLWFLFQ-VZBWJDOASA-N	53480855	CCCCCCCCCCCCCCCC/C=C\OC[C@H](COP(=O)(O)OCCN)OC(=O)CCCCCC/C=C\C/C=C\C/C=C\C/C=C\CC	-0.64273	-0.676449	-0.537854	7.75452e-06	0.00105701	0.014442	IMPC_CBC_002_001___1 point	Clinical Chemistry	Potassium	IMPC_CBC_002_001	20	20	20	20	significant	Different size	IMPC_CBC_002_001	_0042_85
45718	ONLI_0562	CSHNEG	1-(1Z-alkenyl),2-acylglycerophosphoethanolamines	PE 38:7e; PE 16:1e/22:6; [M-H]-	WVGALBKSWOUIEZ-XNHMFJFDSA-N	5283497	CCCCCCCCCCCCCC/C=C\OC[C@H](COP(=O)(O)OCCN)OC(=O)CC/C=C\C/C=C\C/C=C\C/C=C\C/C=C\C/C=C\CC	-0.209894	-0.451467	-0.554427	0.193626	0.0456999	0.0111847	IMPC_CBC_002_001___1 point	Clinical Chemistry	Potassium	IMPC_CBC_002_001	20	20	20	20	significant	Different size	IMPC_CBC_002_001	_0042_98
4626	ONLI_0567	CSHNEG	1-alkyl,2-acylglycerophosphoethanolamines	PE 38:4e; PE 18:0e/20:4;	LRBBGQHIVCMVRY-PQNGYSQDSA-N	52925027	CCCCCCCCCCCCCCCCCCOC[C@H](COP(=O)(O)OCCN)OC(=O)CCC/C=C\C/C=C\C/C=C\C/C=C\CCCCC	-0.555524	-0.568096	-0.574766	0.000198401	0.00897062	0.00802818	IMPC_CBC_002_001___1 point	Clinical Chemistry	Potassium	IMPC_CBC_002_001	20	20	20	20	significant	Different size	IMPC_CBC_002_001	_0042_100
6065	ONLI_0781	HILICPOS	Tryptamines and derivatives	Tryptamine	APJYDQYYACXCRM-UHFFFAOYSA-N	1150	C1=CC=C2C(=C1)C(=CN2)CCN	-0.413686	-0.55982	-0.5484	0.00796721	0.0102636	0.012292	IMPC_CBC_002_001___1 point	Clinical Chemistry	Potassium	IMPC_CBC_002_001	20	20	20	20	significant	Different size	IMPC_CBC_002_001	_0042_132
64610	ONLI_0843	HILICPOS	Cholines	Choline	OEYIOHPDSNJKLS-UHFFFAOYSA-N	305	C[N+](C)(C)CCO	0.579649	0.632054	0.583052	8.86999e-05	0.00279134	0.00697147	IMPC_CBC_002_001___1 point	Clinical Chemistry	Potassium	IMPC_CBC_002_001	20	20	20	20	significant	Different size	IMPC_CBC_002_001	_0042_139
68711	ONLI_0897	HILICPOS	Indolyl carboxylic acids and derivatives	Tryptophan	QIVBCDIJIAJPQS-VIFPVBQESA-N	6305	C1=CC=C2C(=C1)C(=CN2)C[C@@H](C(=O)O)N	-0.418474	-0.550038	-0.522035	0.00720315	0.0119827	0.0182245	IMPC_CBC_002_001___1 point	Clinical Chemistry	Potassium	IMPC_CBC_002_001	20	20	20	20	significant	Different size	IMPC_CBC_002_001	_0042_148
77913	ONLI_1161	Oxylipins	Hydroxyeicosatetraenoic acids	15-HETE	JSFATNQSLKRBCI-VAEKSGALSA-N	5280724	CCCCC[C@@H](/C=C/C=C\C/C=C\C/C=C\CCCC(=O)O)O	0.536097	0.548363	0.529568	0.000363279	0.0122991	0.0163353	IMPC_CBC_002_001___1 point	Clinical Chemistry	Potassium	IMPC_CBC_002_001	20	20	20	20	significant	Different size	IMPC_CBC_002_001	_0042_156
78215	ONLI_1164	Oxylipins	Hydroxyeicosatetraenoic acids	11-HETE	GCZRCCHPLVMMJE-RSPKXIRXSA-N	5312981	CCCCC/C=C\C=C/[C@@H](C/C=C\C/C=C/CCCC(=O)O)O	0.511712	0.471762	0.658629	0.00073836	0.0357284	0.00158994	IMPC_CBC_002_001___1 point	Clinical Chemistry	Potassium	IMPC_CBC_002_001	20	20	20	20	significant	Different size	IMPC_CBC_002_001	_0042_159
2410	ONLI_0030	gctof	Cyclohexanols	pinitol	DSCFFEYYQKSRSV-FEPQRWDDSA-N	164619	COC1[C@@H]([C@H](C([C@@H]([C@@H]1O)O)O)O)O	0.487377	0.560361	0.520496	0.00142437	0.0101747	0.018631	IMPC_CBC_004_001___1 point	Clinical Chemistry	Urea (Blood Urea Nitrogen - BUN)	IMPC_CBC_004_001	20	20	20	20	significant	Different size	IMPC_CBC_004_001	_0044_8
2730	ONLI_0033	gctof	Phenethylamines	phenylethylamine	BHHGXPLMPWCGHP-UHFFFAOYSA-N	1001	C1=CC=C(C=C1)CCN	0.587518	0.61903	0.707785	6.72746e-05	0.00361201	0.000480819	IMPC_CBC_004_001___1 point	Clinical Chemistry	Urea (Blood Urea Nitrogen - BUN)	IMPC_CBC_004_001	20	20	20	20	significant	Different size	IMPC_CBC_004_001	_0044_9
4030	ONLI_0049	gctof	Hexoses	mannose	WQZGKKKJIJFFOK-QTVWNMPRSA-N	18950	C([C@@H]1[C@H]([C@@H]([C@@H](C(O1)O)O)O)O)O	-0.640263	-0.761941	-0.470854	8.6185e-06	9.45936e-05	0.0361349	IMPC_CBC_004_001___1 point	Clinical Chemistry	Urea (Blood Urea Nitrogen - BUN)	IMPC_CBC_004_001	20	20	20	20	significant	Different size	IMPC_CBC_004_001	_0044_13
6910	ONLI_0081	gctof	Glycosylglycerols	glycerol-3-galactoside	NHJUPBDCSOGIKX-VGPGGAHRSA-N	656504	C([C@@H]1[C@@H]([C@@H]([C@H]([C@@H](O1)OCC(CO)O)O)O)O)O	0.59878	0.581422	0.668672	4.47177e-05	0.00716982	0.00126726	IMPC_CBC_004_001___1 point	Clinical Chemistry	Urea (Blood Urea Nitrogen - BUN)	IMPC_CBC_004_001	20	20	20	20	significant	Different size	IMPC_CBC_004_001	_0044_20
11211	ONLI_0158	CSHPOS	Acyl carnitines	AC 14:1	ABVVZYXTZLEOHP-OLHLWXQYSA-N	90659872	CCCC/C=C\CCCCCCCC(=O)O[C@H](CC(=O)[O-])C[N+](C)(C)C	-0.710652	-0.679203	-0.582926	2.78293e-07	0.000989976	0.00698663	IMPC_CBC_004_001___1 point	Clinical Chemistry	Urea (Blood Urea Nitrogen - BUN)	IMPC_CBC_004_001	20	20	20	20	significant	Different size	IMPC_CBC_004_001	_0044_30
1133	ONLI_0159	CSHPOS	Triacylglycerols	TAG 54:7; TAG 18:2-18:2-18:3;	NGPHUAVENUDDAO-GZNXBNPNSA-N	100977823	CCCCC/C=C\C/C=C\CCCCCCCC(=O)OC[C@@H](COC(=O)CCCCCCC/C=C\C/C=C\C/C=C\CC)OC(=O)CCCCCCC/C=C\C/C=C\CCCCC	0.579822	0.71982	0.513727	8.817e-05	0.000345875	0.0205064	IMPC_CBC_004_001___1 point	Clinical Chemistry	Urea (Blood Urea Nitrogen - BUN)	IMPC_CBC_004_001	20	20	20	20	significant	Different size	IMPC_CBC_004_001	_0044_31
1272	ONLI_0175	CSHPOS	Triacylglycerols	TAG 60:13; TAG 18:2-20:5-22:6;	GKGVYCDLFAHWTQ-MYJMWWOYSA-N	131763450	CCCCC/C=C\C/C=C\CCCCCCCC(=O)OC[C@@H](COC(=O)CC/C=C\C/C=C\C/C=C\C/C=C\C/C=C\C/C=C\CC)OC(=O)CCC/C=C\C/C=C\C/C=C\C/C=C\C/C=C\CC	-0.513843	-0.474615	-0.447537	0.000695436	0.034475	0.0478568	IMPC_CBC_004_001___1 point	Clinical Chemistry	Urea (Blood Urea Nitrogen - BUN)	IMPC_CBC_004_001	20	20	20	20	significant	Different size	IMPC_CBC_004_001	_0044_35
13212	ONLI_0180	CSHPOS	Phosphatidylcholines	PC 39:7; PC 17:1-22:6;	BWMGYQAIDPQZGJ-VKOPMEPESA-N	52922579	CCCCCCC/C=C\CCCCCCCC(=O)OC[C@H](COP(=O)([O-])OCC[N+](C)(C)C)OC(=O)CC/C=C\C/C=C\C/C=C\C/C=C\C/C=C\C/C=C\CC	-0.252276	-0.452802	-0.479128	0.116308	0.0449849	0.0325623	IMPC_CBC_004_001___1 point	Clinical Chemistry	Urea (Blood Urea Nitrogen - BUN)	IMPC_CBC_004_001	20	20	20	20	significant	Different size	IMPC_CBC_004_001	_0044_38
16911	ONLI_0220	CSHPOS	Phosphatidylcholines	PC 36:4; PC 18:2-18:2;	FVXDQWZBHIXIEJ-LNDKUQBDSA-N	5288075	CCCCC/C=C\C/C=C\CCCCCCCC(=O)OC[C@H](COP(=O)([O-])OCC[N+](C)(C)C)OC(=O)CCCCCCC/C=C\C/C=C\CCCCC	0.565932	0.81384	0.532531	0.000141266	1.26943e-05	0.0156367	IMPC_CBC_004_001___1 point	Clinical Chemistry	Urea (Blood Urea Nitrogen - BUN)	IMPC_CBC_004_001	20	20	20	20	significant	Different size	IMPC_CBC_004_001	_0044_56
1834	ONLI_0234	CSHPOS	Fatty acid esters	AC 18:1	HITOYGLMAFIRNI-YSESTWPTSA-N	53477830	CCCCCC/C=C/CCCCCCCCCC(=O)O[C@@H](CCC(=O)[O-])[N+](C)(C)C	-0.814829	-0.837909	-0.684468	1.56516e-10	4.00877e-06	0.000871778	IMPC_CBC_004_001___1 point	Clinical Chemistry	Urea (Blood Urea Nitrogen - BUN)	IMPC_CBC_004_001	20	20	20	20	significant	Different size	IMPC_CBC_004_001	_0044_59
2139	ONLI_0267	CSHPOS	Triacylglycerols	TAG 48:0; TAG 14:0-16:0-18:0;	JTDPHURHZMZJHD-DYVQZXGMSA-N	131753268	CCCCCCCCCCCCCCCCCC(=O)OC[C@H](COC(=O)CCCCCCCCCCCCC)OC(=O)CCCCCCCCCCCCCCC	0.468325	0.446785	0.530275	0.00230611	0.0482783	0.0161665	IMPC_CBC_004_001___1 point	Clinical Chemistry	Urea (Blood Urea Nitrogen - BUN)	IMPC_CBC_004_001	20	20	20	20	significant	Different size	IMPC_CBC_004_001	_0044_71
21513	ONLI_0269	CSHPOS	Triacylglycerols	TAG 46:0; TAG 14:0-16:0-16:0;	JWVXCFSNEOMSHH-DXQCBLCSSA-N	91867460	CCCCCCCCCCCCCCCC(=O)OC[C@H](COC(=O)CCCCCCCCCCCCC)OC(=O)CCCCCCCCCCCCCCC	0.512342	0.485145	0.458819	0.00072544	0.0301423	0.0418673	IMPC_CBC_004_001___1 point	Clinical Chemistry	Urea (Blood Urea Nitrogen - BUN)	IMPC_CBC_004_001	20	20	20	20	significant	Different size	IMPC_CBC_004_001	_0044_73
2812	ONLI_0340	CSHPOS	Triacylglycerols	TAG 54:6; TAG 18:1-18:2-18:3;	OTUIORVXGJUHBH-JBQDKWDBSA-N	100921577	CCCCCCCC/C=C\CCCCCCCC(=O)OC[C@@H](COC(=O)CCCCCCC/C=C\C/C=C\C/C=C\CC)OC(=O)CCCCCCC/C=C\C/C=C\CCCCC	0.56321	0.665664	0.537796	0.000154557	0.00135755	0.0144546	IMPC_CBC_004_001___1 point	Clinical Chemistry	Urea (Blood Urea Nitrogen - BUN)	IMPC_CBC_004_001	20	20	20	20	significant	Different size	IMPC_CBC_004_001	_0044_101
2963	ONLI_0355	CSHPOS	Acyl carnitines	AC 20:4;	RBFQHRALHSUPIA-JTPUQHSZSA-N	136212424	CCCCC/C=C\C/C=C\C/C=C\C/C=C\CCCC(=O)O[C@H](CC(=O)[O-])C[N+](C)(C)C	-0.721164	-0.807823	-0.617525	1.52717e-07	1.65099e-05	0.0037185	IMPC_CBC_004_001___1 point	Clinical Chemistry	Urea (Blood Urea Nitrogen - BUN)	IMPC_CBC_004_001	20	20	20	20	significant	Different size	IMPC_CBC_004_001	_0044_106
3166	ONLI_0378	CSHPOS	Phosphatidylethanolamines	PE 36:4; PE 18:2-18:2;	SSCDRSKJTAQNNB-DWEQTYCFSA-N	9546812	CCCCC/C=C\C/C=C\CCCCCCCC(=O)OC[C@H](COP(=O)(O)OCCN)OC(=O)CCCCCCC/C=C\C/C=C\CCCCC	0.483998	0.676946	0.540053	0.00155457	0.00104462	0.0139705	IMPC_CBC_004_001___1 point	Clinical Chemistry	Urea (Blood Urea Nitrogen - BUN)	IMPC_CBC_004_001	20	20	20	20	significant	Different size	IMPC_CBC_004_001	_0044_114
3564	ONLI_0418	CSHPOS	Triacylglycerols	TAG 54:8; TAG 18:2-18:3-18:3;	IMPMCCKWZKDAGE-GLLBNYCSSA-N	97161142	CCCCC/C=C\C/C=C\CCCCCCCC(=O)OC[C@@H](COC(=O)CCCCCCC/C=C\C/C=C\C/C=C\CC)OC(=O)CCCCCCC/C=C\C/C=C\C/C=C\CC	0.52886	0.708537	0.451298	0.000450908	0.000471242	0.0457916	IMPC_CBC_004_001___1 point	Clinical Chemistry	Urea (Blood Urea Nitrogen - BUN)	IMPC_CBC_004_001	20	20	20	20	significant	Different size	IMPC_CBC_004_001	_0044_128
3902	ONLI_0454	CSHPOS	Triacylglycerols	TAG 50:1; TAG 16:0-16:0-18:1;	ZKEWGTVAIGJNBK-ZMSSUMMHSA-N	131750533	CCCCCCCCCCCCCCCC(=O)OC[C@@H](COC(=O)CCCCCCCCC/C=C\CCCCCC)OC(=O)CCCCCCCCCCCCCCC	0.562459	0.716059	0.444528	0.000158417	0.000384048	0.0495599	IMPC_CBC_004_001___1 point	Clinical Chemistry	Urea (Blood Urea Nitrogen - BUN)	IMPC_CBC_004_001	20	20	20	20	significant	Different size	IMPC_CBC_004_001	_0044_135
39714	ONLI_0474	CSHNEG	Long-chain fatty acids	FA 14:1	AFGUVBVUFZMJMX-KTKRTIGZSA-N	5312400	CCCCCCCC/C=C\CCCC(=O)O	-0.68916	-0.70252	-0.731854	8.78035e-07	0.000552606	0.000244638	IMPC_CBC_004_001___1 point	Clinical Chemistry	Urea (Blood Urea Nitrogen - BUN)	IMPC_CBC_004_001	20	20	20	20	significant	Different size	IMPC_CBC_004_001	_0044_138
3994	ONLI_0476	CSHNEG	Long-chain fatty acids	FA 15:0	WQEPLUUGTLDZJY-UHFFFAOYSA-N	13849	CCCCCCCCCCCCCCC(=O)O	-0.583951	-0.58443	-0.689733	7.63232e-05	0.0068073	0.000765731	IMPC_CBC_004_001___1 point	Clinical Chemistry	Urea (Blood Urea Nitrogen - BUN)	IMPC_CBC_004_001	20	20	20	20	significant	Different size	IMPC_CBC_004_001	_0044_139
40011	ONLI_0477	CSHNEG	Long-chain fatty acids	FA 16:1	SECPZKHBENQXJG-FPLPWBNLSA-N	445638	CCCCCC/C=C\CCCCCCCC(=O)O	-0.590146	-0.607747	-0.697255	6.12427e-05	0.00447598	0.000633291	IMPC_CBC_004_001___1 point	Clinical Chemistry	Urea (Blood Urea Nitrogen - BUN)	IMPC_CBC_004_001	20	20	20	20	significant	Different size	IMPC_CBC_004_001	_0044_140
4035	ONLI_0480	CSHNEG	Lineolic acids and derivatives	FA 18:2	JBYXPOFIGCOSSB-GOJKSUSPSA-N	5280644	CCCCCC/C=C/C=C\CCCCCCCC(=O)O	-0.559268	-0.444528	-0.69575	0.000175811	0.0495599	0.000658098	IMPC_CBC_004_001___1 point	Clinical Chemistry	Urea (Blood Urea Nitrogen - BUN)	IMPC_CBC_004_001	20	20	20	20	significant	Different size	IMPC_CBC_004_001	_0044_143
40410	ONLI_0481	CSHNEG	Long-chain fatty acids	FA 18:1	ZQPPMHVWECSIRJ-KTKRTIGZSA-N	445639	CCCCCCCC/C=C\CCCCCCCC(=O)O	-0.64993	-0.564874	-0.678451	5.66654e-06	0.00945725	0.00100792	IMPC_CBC_004_001___1 point	Clinical Chemistry	Urea (Blood Urea Nitrogen - BUN)	IMPC_CBC_004_001	20	20	20	20	significant	Different size	IMPC_CBC_004_001	_0044_144
4065	ONLI_0484	CSHNEG	Long-chain fatty acids	FA 20:4	YZXBAPSDXZZRGB-DOFZRALJSA-N	444899	CCCCC/C=C\C/C=C\C/C=C\C/C=C\CCCC(=O)O	-0.554857	-0.463332	-0.639338	0.000202693	0.0396408	0.00240457	IMPC_CBC_004_001___1 point	Clinical Chemistry	Urea (Blood Urea Nitrogen - BUN)	IMPC_CBC_004_001	20	20	20	20	significant	Different size	IMPC_CBC_004_001	_0044_146
4086	ONLI_0486	CSHNEG	Long-chain fatty acids	FA 20:3 b	HOBAELRKJCKHQD-QNEBEIHSSA-N	5280581	CCCCC/C=C\C/C=C\C/C=C\CCCCCCC(=O)O	-0.553637	-0.537796	-0.600226	0.000210755	0.0144546	0.00514175	IMPC_CBC_004_001___1 point	Clinical Chemistry	Urea (Blood Urea Nitrogen - BUN)	IMPC_CBC_004_001	20	20	20	20	significant	Different size	IMPC_CBC_004_001	_0044_147
4099	ONLI_0487	CSHNEG	Long-chain fatty acids	FA 20:2	XSXIVVZCUAHUJO-HZJYTTRNSA-N	6439848	CCCCC/C=C\C/C=C\CCCCCCCCCC(=O)O	-0.537963	-0.484393	-0.677698	0.00034331	0.0304368	0.00102613	IMPC_CBC_004_001___1 point	Clinical Chemistry	Urea (Blood Urea Nitrogen - BUN)	IMPC_CBC_004_001	20	20	20	20	significant	Different size	IMPC_CBC_004_001	_0044_148
41210	ONLI_0491	CSHNEG	Very long-chain fatty acids	FA 22:6	MBMBGCFOFBJSGT-KUBAVDMBSA-N	445580	CC/C=C\C/C=C\C/C=C\C/C=C\C/C=C\C/C=C\CCC(=O)O	-0.725575	-0.639338	-0.818353	1.17763e-07	0.00240457	1.03591e-05	IMPC_CBC_004_001___1 point	Clinical Chemistry	Urea (Blood Urea Nitrogen - BUN)	IMPC_CBC_004_001	20	20	20	20	significant	Different size	IMPC_CBC_004_001	_0044_150
52614	ONLI_0646	CSHNEG	Phosphatidylinositols	PI 36:1; PI 18:0-18:1;	YOBFISPJJWPPTK-UDGQDVNKSA-N	13073037	CCCCCCCCCCCCCCCCCC(=O)OCC(COP(=O)(O)OC1[C@@H]([C@H](C([C@H]([C@@H]1O)O)O)O)O)OC(=O)CCCCCCC/C=C/CCCCCCCC	0.584045	0.77548	0.453554	7.60716e-05	5.89381e-05	0.0445858	IMPC_CBC_004_001___1 point	Clinical Chemistry	Urea (Blood Urea Nitrogen - BUN)	IMPC_CBC_004_001	20	20	20	20	significant	Different size	IMPC_CBC_004_001	_0044_186
5325	ONLI_0653	CSHNEG	Phosphatidylcholines	PC 38:4	PSVRFUPOQYJOOZ-QNPWAGBNSA-N	16219824	CCCCCCCCCCCCCCCCCC(=O)OC[C@H](COP(=O)([O-])OCC[N+](C)(C)C)OC(=O)CCC/C=C\C/C=C\C/C=C\C/C=C\CCCCC	-0.530925	-0.458819	-0.463332	0.000424157	0.0418673	0.0396408	IMPC_CBC_004_001___1 point	Clinical Chemistry	Urea (Blood Urea Nitrogen - BUN)	IMPC_CBC_004_001	20	20	20	20	significant	Different size	IMPC_CBC_004_001	_0044_188
5334	ONLI_0654	CSHNEG	Phosphatidylcholines	PC 38:4; PC 16:0-22:4;	IRWRFKUTKSUFST-MDYGELLQSA-N	24778732	CCCCCCCCCCCCCCCC(=O)OC[C@H](COP(=O)([O-])OCC[N+](C)(C)C)OC(=O)CCCCC/C=C\C/C=C\C/C=C\C/C=C\CCCCC	-0.530925	-0.458819	-0.463332	0.000424157	0.0418673	0.0396408	IMPC_CBC_004_001___1 point	Clinical Chemistry	Urea (Blood Urea Nitrogen - BUN)	IMPC_CBC_004_001	20	20	20	20	significant	Different size	IMPC_CBC_004_001	_0044_189
5756	ONLI_0732	HILICPOS	Dipeptides	Glu-Phe	XMBSYZWANAQXEV-QWRGUYRKSA-N	18653118	C1=CC=C(C=C1)C[C@@H](C(=O)O)NC(=O)[C@H](CCC(=O)O)N	0.569686	0.547574	0.594961	0.000124627	0.0124504	0.00565473	IMPC_CBC_004_001___1 point	Clinical Chemistry	Urea (Blood Urea Nitrogen - BUN)	IMPC_CBC_004_001	20	20	20	20	significant	Different size	IMPC_CBC_004_001	_0044_201
57811	ONLI_0735	HILICPOS	Acyl carnitines	Hexanoyl-L-carnitine	VVPRQWTYSNDTEA-LLVKDONJSA-N	3246938	CCCCCC(=O)O[C@H](CC(=O)[O-])C[N+](C)(C)C	-0.68184	-0.754419	-0.553592	1.27043e-06	0.000121447	0.0113331	IMPC_CBC_004_001___1 point	Clinical Chemistry	Urea (Blood Urea Nitrogen - BUN)	IMPC_CBC_004_001	20	20	20	20	significant	Different size	IMPC_CBC_004_001	_0044_202
5802	ONLI_0740	HILICPOS	Acyl carnitines	Lauroyl-L-carnitine	FUJLYHJROOYKRA-QGZVFWFLSA-N	168381	CCCCCCCCCCCC(=O)O[C@H](CC(=O)[O-])C[N+](C)(C)C	-0.694885	-0.790523	-0.528018	6.52798e-07	3.35087e-05	0.0167106	IMPC_CBC_004_001___1 point	Clinical Chemistry	Urea (Blood Urea Nitrogen - BUN)	IMPC_CBC_004_001	20	20	20	20	significant	Different size	IMPC_CBC_004_001	_0044_203
5852	ONLI_0747	HILICPOS	Acyl carnitines	Linoleoylcarnitine	MJLXQSQYKZWZCB-DQFWFXSYSA-N	6450015	CCCCC/C=C\C/C=C\CCCCCCCC(=O)O[C@H](CC(=O)[O-])C[N+](C)(C)C	-0.715251	-0.808575	-0.539301	2.14734e-07	1.59843e-05	0.0141304	IMPC_CBC_004_001___1 point	Clinical Chemistry	Urea (Blood Urea Nitrogen - BUN)	IMPC_CBC_004_001	20	20	20	20	significant	Different size	IMPC_CBC_004_001	_0044_205
5885	ONLI_0751	HILICPOS	N-acyl-L-alpha-amino acids	N-.alpha.-Acetyl-L-arginine	SNEIUMQYRCDYCH-LURJTMIESA-N	67427	CC(=O)N[C@@H](CCCN=C(N)N)C(=O)O	0.723322	0.637082	0.784506	1.3456e-07	0.00251928	4.22221e-05	IMPC_CBC_004_001___1 point	Clinical Chemistry	Urea (Blood Urea Nitrogen - BUN)	IMPC_CBC_004_001	20	20	20	20	significant	Different size	IMPC_CBC_004_001	_0044_207
61316	ONLI_0795	HILICPOS	Delta amino acids and derivatives	5-Aminovaleric acid	JJMDCOVWQOJGCB-UHFFFAOYSA-N	138	C(CCN)CC(=O)O	0.439794	0.472358	0.597969	0.00451715	0.0354636	0.00535669	IMPC_CBC_004_001___1 point	Clinical Chemistry	Urea (Blood Urea Nitrogen - BUN)	IMPC_CBC_004_001	20	20	20	20	significant	Different size	IMPC_CBC_004_001	_0044_215
61516	ONLI_0799	HILICPOS	Alpha amino acids	Betaine	KWIUHFFTVRNATP-UHFFFAOYSA-N	247	C[N+](C)(C)CC(=O)[O-]	0.439794	0.472358	0.597969	0.00451715	0.0354636	0.00535669	IMPC_CBC_004_001___1 point	Clinical Chemistry	Urea (Blood Urea Nitrogen - BUN)	IMPC_CBC_004_001	20	20	20	20	significant	Different size	IMPC_CBC_004_001	_0044_217
6174	ONLI_0802	HILICPOS	Pyrimidones	Cytosine	OPTASPLRGRRNAP-UHFFFAOYSA-N	597	C1=C(NC(=O)N=C1)N	0.518536	0.712298	0.616773	0.000608673	0.00042575	0.00377271	IMPC_CBC_004_001___1 point	Clinical Chemistry	Urea (Blood Urea Nitrogen - BUN)	IMPC_CBC_004_001	20	20	20	20	significant	Different size	IMPC_CBC_004_001	_0044_219
6313	ONLI_0820	HILICPOS	Aminobenzoic acids	4-Aminobenzoic acid	ALYNCZNDIQEVRV-UHFFFAOYSA-N	978	C1=CC(=CC=C1C(=O)O)N	0.778226	0.731102	0.891313	3.4144e-09	0.000250121	1.34668e-07	IMPC_CBC_004_001___1 point	Clinical Chemistry	Urea (Blood Urea Nitrogen - BUN)	IMPC_CBC_004_001	20	20	20	20	significant	Different size	IMPC_CBC_004_001	_0044_223
6323	ONLI_0821	HILICPOS	Gamma amino acids and derivatives	4-Guanidinobutyric acid	TUHVEAJXIMEOSA-UHFFFAOYSA-N	500	C(CC(=O)O)CN=C(N)N	0.681746	0.728093	0.653629	1.27638e-06	0.000273117	0.00177468	IMPC_CBC_004_001___1 point	Clinical Chemistry	Urea (Blood Urea Nitrogen - BUN)	IMPC_CBC_004_001	20	20	20	20	significant	Different size	IMPC_CBC_004_001	_0044_224
6538	ONLI_0851	HILICPOS	Dipeptides	gamma-Glutamylleucine	MYFMARDICOWMQP-YUMQZZPRSA-N	151023	CC(C)C[C@@H](C(=O)O)NC(=O)CC[C@@H](C(=O)O)N	0.548193	0.458067	0.686724	0.000250358	0.0422476	0.000824903	IMPC_CBC_004_001___1 point	Clinical Chemistry	Urea (Blood Urea Nitrogen - BUN)	IMPC_CBC_004_001	20	20	20	20	significant	Different size	IMPC_CBC_004_001	_0044_234
66611	ONLI_0867	HILICPOS	Leucine and derivatives	Leucine	ROHFNLRQFUQHCH-YFKPBYRVSA-N	6106	CC(C)C[C@@H](C(=O)O)N	0.605537	0.617525	0.683716	3.47387e-05	0.0037185	0.000887895	IMPC_CBC_004_001___1 point	Clinical Chemistry	Urea (Blood Urea Nitrogen - BUN)	IMPC_CBC_004_001	20	20	20	20	significant	Different size	IMPC_CBC_004_001	_0044_241
6701	ONLI_0875	HILICPOS	Methionine and derivatives	N-Acetylmethionine	XUYPXLNMDZIRQH-UHFFFAOYSA-N	6180	CC(=O)NC(CCSC)C(=O)O	0.691976	0.71305	0.626551	7.59567e-07	0.000417115	0.00311675	IMPC_CBC_004_001___1 point	Clinical Chemistry	Urea (Blood Urea Nitrogen - BUN)	IMPC_CBC_004_001	20	20	20	20	significant	Different size	IMPC_CBC_004_001	_0044_243
6781	ONLI_0885	HILICPOS	Proline and derivatives	Proline	ONIBWKKTOPOVIA-BYPYZUCNSA-N	145742	C1C[C@H](NC1)C(=O)O	0.641201	0.627304	0.639338	8.27993e-06	0.0030705	0.00240457	IMPC_CBC_004_001___1 point	Clinical Chemistry	Urea (Blood Urea Nitrogen - BUN)	IMPC_CBC_004_001	20	20	20	20	significant	Different size	IMPC_CBC_004_001	_0044_245
68816	ONLI_0899	HILICPOS	Valine and derivatives	Valine	KZSNJWFQEVHDMF-BYPYZUCNSA-N	6287	CC(C)[C@@H](C(=O)O)N	0.439794	0.472358	0.597969	0.00451715	0.0354636	0.00535669	IMPC_CBC_004_001___1 point	Clinical Chemistry	Urea (Blood Urea Nitrogen - BUN)	IMPC_CBC_004_001	20	20	20	20	significant	Different size	IMPC_CBC_004_001	_0044_248
7672	ONLI_1144	Oxylipins	Hydroxyeicosatrienoic acids	14,15-DiHETrE	SYAWGTIVOGUZMM-ILYOTBPNSA-N	5283147	CCCCCC(C(C/C=C\C/C=C\C/C=C\CCCC(=O)O)O)O	-0.642039	-0.585999	-0.682468	7.98808e-06	0.00662429	0.000915185	IMPC_CBC_004_001___1 point	Clinical Chemistry	Urea (Blood Urea Nitrogen - BUN)	IMPC_CBC_004_001	20	20	20	20	significant	Different size	IMPC_CBC_004_001	_0044_275
7683	ONLI_1145	Oxylipins	Hydroxyeicosatrienoic acids	11,12-DiHETrE	LRPPQRCHCPFBPE-KROJNAHFSA-N	5283146	CCCCC/C=C\CC(C(C/C=C\C/C=C\CCCC(=O)O)O)O	-0.574461	-0.529567	-0.682248	0.000106028	0.0163355	0.000920076	IMPC_CBC_004_001___1 point	Clinical Chemistry	Urea (Blood Urea Nitrogen - BUN)	IMPC_CBC_004_001	20	20	20	20	significant	Different size	IMPC_CBC_004_001	_0044_276
7737	ONLI_1150	Oxylipins	Very long-chain fatty acids	19,20-DiHDPE	FFXKPSNQCPNORO-MBYQGORISA-N	16061148	CCC(C(C/C=C\C/C=C\C/C=C\C/C=C\C/C=C\CCC(=O)O)O)O	-0.716505	-0.737119	-0.682964	1.99906e-07	0.000209052	0.000904262	IMPC_CBC_004_001___1 point	Clinical Chemistry	Urea (Blood Urea Nitrogen - BUN)	IMPC_CBC_004_001	20	20	20	20	significant	Different size	IMPC_CBC_004_001	_0044_279
2525	ONLI_0031	gctof	Medium-chain fatty acids	pimelic acid	WLJVNTCWHIRURA-UHFFFAOYSA-N	385	C(CCC(=O)O)CCC(=O)O	0.586598	0.532331	0.531579	8.68763e-05	0.0170885	0.0207625	IMPC_CBC_005_001___1 point	Clinical Chemistry	Creatinine	IMPC_CBC_005_001	20	20	20	19	significant	Different size	IMPC_CBC_005_001	_0045_5
62412	ONLI_0812	HILICPOS	Leucine and derivatives	N-Methylleucine	XJODGRWDFZVTKW-LURJTMIESA-N	2777993	CC(C)C[C@@H](C(=O)O)NC	-0.545142	-0.574436	-0.505263	0.000410504	0.00919321	0.0290236	IMPC_CBC_005_001___1 point	Clinical Chemistry	Creatinine	IMPC_CBC_005_001	20	20	20	19	significant	Different size	IMPC_CBC_005_001	_0045_64
57111	ONLI_0722	HILICPOS	Dipeptides	Arg-Val	DAQIJMOLTMGJLO-UHFFFAOYSA-N	335257	CC(C)C(C(=O)O)NC(=O)C(CCCN=C(N)N)N	-0.710078	-0.683013	-0.927634	0.000961193	0.0143594	0.00766584	IMPC_CBC_006_001___1 point	Clinical Chemistry	Total protein	IMPC_CBC_006_001	12	6	20	20	significant	Different size	IMPC_CBC_006_001	_0046_107
61213	ONLI_0793	HILICPOS	Proline and derivatives	3-Hydroxyproline	BJBUEDPLEOHJGE-BKLSDQPFSA-N	150779	C1CN[C@@H](C1O)C(=O)O	-0.269532	-0.659142	-0.536292	0.0925875	0.00157193	0.0147847	IMPC_CBC_006_001___1 point	Clinical Chemistry	Total protein	IMPC_CBC_006_001	20	20	20	20	significant	Different size	IMPC_CBC_006_001	_0046_118
6793	ONLI_0886	HILICPOS	Dipeptides	Proline-hydroxyproline	ONPXCLZMBSJLSP-CSMHCCOUSA-N	11902892	C1C[C@H]([NH2+]C1)C(=O)N2C[C@@H](C[C@H]2C(=O)[O-])O	-0.488199	-0.510911	-0.47311	0.0013942	0.0213295	0.0351317	IMPC_CBC_006_001___1 point	Clinical Chemistry	Total protein	IMPC_CBC_006_001	20	20	20	20	significant	Different size	IMPC_CBC_006_001	_0046_132
1992	ONLI_0252	CSHPOS	Cholesteryl esters	CE (20:4)	IMXSFYNMSOULQS-BEDFLICRSA-N	6479222	CCCCC/C=C\C/C=C\C/C=C\C/C=C\CCCC(=O)O[C@H]1CC[C@@]2([C@H]3CC[C@]4([C@H]([C@@H]3CC=C2C1)CC[C@@H]4[C@H](C)CCCC(C)C)C)C	0.440439	0.671195	0.450132	0.00445169	0.00119553	0.0464241	IMPC_CBC_007_001___1 point	Clinical Chemistry	Albumin	IMPC_CBC_007_001	20	20	20	20	significant	Different size	IMPC_CBC_007_001	_0047_33
2508	ONLI_0308	CSHPOS	Cholesteryl esters	CE (20:3)	MLPRJPSMAFZPLA-PJSAOELNSA-N	53477892	CCCCC/C=C\C/C=C\C/C=C\CCCCCCC(=O)O[C@H]1CC[C@@]2(C3CC[C@]4(C(C3CC=C2C1)CCC4[C@H](C)CCCC(C)C)C)C	0.107669	0.658374	0.59842	0.508424	0.00159896	0.0053132	IMPC_CBC_007_001___1 point	Clinical Chemistry	Albumin	IMPC_CBC_007_001	20	20	20	20	significant	Different size	IMPC_CBC_007_001	_0047_49
30218	ONLI_0362	CSHPOS	Cholesteryl esters	CE (18:1)	RJECHNNFRHZQKU-RMUVNZEASA-N	5283632	CCCCCCCC/C=C\CCCCCCCC(=O)O[C@H]1CC[C@@]2([C@H]3CC[C@]4([C@H]([C@@H]3CC=C2C1)CC[C@@H]4[C@H](C)CCCC(C)C)C)C	0.591571	0.572401	0.459917	5.81812e-05	0.00835263	0.0413167	IMPC_CBC_007_001___1 point	Clinical Chemistry	Albumin	IMPC_CBC_007_001	20	20	20	20	significant	Different size	IMPC_CBC_007_001	_0047_66
3376	ONLI_0399	CSHPOS	Cholesteryl esters	CE (22:6)	VOEVEGPMRIYYKC-IWVSHIRDSA-N	53477890	CC/C=C\C/C=C\C/C=C\C/C=C\C/C=C\C/C=C\CCC(=O)O[C@H]1CC[C@@]2(C3CC[C@]4(C(C3CC=C2C1)CCC4[C@H](C)CCCC(C)C)C)C	0.177039	0.587484	0.522394	0.274459	0.00645487	0.0181307	IMPC_CBC_007_001___1 point	Clinical Chemistry	Albumin	IMPC_CBC_007_001	20	20	20	20	significant	Different size	IMPC_CBC_007_001	_0047_78
3639	ONLI_0425	CSHPOS	Cholesteryl esters	CE ( 22:5)	XOLZNHXNFMEUGA-DCDLNIKOSA-N	42608400	CC/C=C\C/C=C\C/C=C\C/C=C\C/C=C\CCCCCC(=O)O[C@H]1CC[C@@]2([C@H]3CC[C@]4([C@H]([C@@H]3CC=C2C1)CC[C@@H]4[C@H](C)CCCC(C)C)C)C	0.0783817	0.538464	0.605947	0.630694	0.01431	0.00462846	IMPC_CBC_007_001___1 point	Clinical Chemistry	Albumin	IMPC_CBC_007_001	20	20	20	20	significant	Different size	IMPC_CBC_007_001	_0047_85
3885	ONLI_0452	CSHPOS	Triacylglycerols	TAG 62:2; TAG 18:2-22:0-22:0;	VPZZYXWJCZKULK-CUUCRUSKSA-N	9545738	CCCCCCCCCCCCCCCCCCCCCC(=O)OC[C@@H](COC(=O)CCCCCCC/C=C\C/C=C\CCCCC)OC(=O)CCCCCCCCCCCCCCCCCCCCC	0.336643	0.762565	0.77557	0.0859791	0.00635052	0.00041481	IMPC_CBC_007_001___1 point	Clinical Chemistry	Albumin	IMPC_CBC_007_001	11	16	20	20	significant	Different size	IMPC_CBC_007_001	_0047_98
6702	ONLI_0875	HILICPOS	Methionine and derivatives	N-Acetylmethionine	XUYPXLNMDZIRQH-UHFFFAOYSA-N	6180	CC(=O)NC(CCSC)C(=O)O	-0.310898	-0.468328	-0.484758	0.0508627	0.0372842	0.0302937	IMPC_CBC_007_001___1 point	Clinical Chemistry	Albumin	IMPC_CBC_007_001	20	20	20	20	significant	Different size	IMPC_CBC_007_001	_0047_175
6806	ONLI_0887	HILICPOS	Acyl carnitines	Propionylcarnitine	UFAHZIUFPNSHSL-UHFFFAOYSA-N	107738	CCC(=O)OC(CC(=O)[O-])C[N+](C)(C)C	-0.1853	-0.533185	-0.484005	0.252323	0.0154858	0.0305896	IMPC_CBC_007_001___1 point	Clinical Chemistry	Albumin	IMPC_CBC_007_001	20	20	20	20	significant	Different size	IMPC_CBC_007_001	_0047_179
6112	ONLI_0072	gctof	Hippuric acids	hippuric acid	QIAFMBKCNZACKA-UHFFFAOYSA-N	464	C1=CC=C(C=C1)C(=O)NCC(=O)O	-0.506409	-0.520609	-0.520154	0.00100392	0.0222947	0.0187226	IMPC_CBC_008_001___1 point	Clinical Chemistry	Total bilirubin	IMPC_CBC_008_001	20	20	19	20	significant	Different size	IMPC_CBC_008_001	_0048_15
9617	ONLI_0116	gctof	Tryptamines and derivatives	5-methoxytryptamine	JTEJPPKMYBDEMY-UHFFFAOYSA-N	1833	COC1=CC2=C(C=C1)NC=C2CCN	0.53813	0.527802	0.491851	0.000410111	0.0201994	0.0276139	IMPC_CBC_008_001___1 point	Clinical Chemistry	Total bilirubin	IMPC_CBC_008_001	20	20	19	20	significant	Different size	IMPC_CBC_008_001	_0048_28
37815	ONLI_0441	CSHPOS	Acyl carnitines	AC 8:1	LOSHAHDSFZXVCT-LXKVQUBZSA-N	70679121	CCCCC/C=C/C(=O)O[C@@H](CC(=O)[O-])C[N+](C)(C)C	0.529864	0.458567	0.503325	0.000522281	0.048302	0.0236778	IMPC_CBC_008_001___1 point	Clinical Chemistry	Total bilirubin	IMPC_CBC_008_001	20	20	19	20	significant	Different size	IMPC_CBC_008_001	_0048_92
56012	ONLI_0704	HILICPOS	Pyrrolidinylpyridines	S-Cotinine N-oxide	CIPULDKLIIVIER-VIFPVBQESA-N	9815514	CN1[C@@H](CCC1=O)C2=C[N+](=CC=C2)[O-]	0.523994	0.611423	0.45284	0.000617814	0.00540997	0.0449649	IMPC_CBC_008_001___1 point	Clinical Chemistry	Total bilirubin	IMPC_CBC_008_001	20	20	19	20	significant	Different size	IMPC_CBC_008_001	_0048_133
5659	ONLI_0710	HILICPOS	Hydroxyindoles	5-Hydroxytryptophol	KQROHCSYOGBQGJ-UHFFFAOYSA-N	9061	C1=CC2=C(C=C1O)C(=CN2)CCO	0.591862	0.472054	0.628774	7.23013e-05	0.0412858	0.00298173	IMPC_CBC_008_001___1 point	Clinical Chemistry	Total bilirubin	IMPC_CBC_008_001	20	20	19	20	significant	Different size	IMPC_CBC_008_001	_0048_135
59112	ONLI_0754	HILICPOS	Hybrid peptides	N-Acetyl-L-carnosine	BKAYIFDRRZZKNF-SECBINFHSA-N	10221026	CC(=O)NCCC(=O)N[C@H](CC1=CN=CN1)C(=O)O	0.220973	0.522042	0.49797	0.195277	0.0380551	0.0254552	IMPC_CBC_008_001___1 point	Clinical Chemistry	Total bilirubin	IMPC_CBC_008_001	17	20	19	20	significant	Different size	IMPC_CBC_008_001	_0048_141
62016	ONLI_0808	HILICPOS	Hydroxyindoles	N-Acetyl-5-hydroxytryptamine	MVAWJSIDNICKHF-UHFFFAOYSA-N	903	CC(=O)NCCC1=CNC2=C1C=C(C=C2)O	0.645743	0.48799	0.742152	2.79966e-05	0.0399258	0.000646494	IMPC_CBC_008_001___1 point	Clinical Chemistry	Total bilirubin	IMPC_CBC_008_001	19	17	19	20	significant	Different size	IMPC_CBC_008_001	_0048_148
77915	ONLI_1161	Oxylipins	Hydroxyeicosatetraenoic acids	15-HETE	JSFATNQSLKRBCI-VAEKSGALSA-N	5280724	CCCCC[C@@H](/C=C/C=C\C/C=C\C/C=C\CCCC(=O)O)O	0.661547	0.676009	0.647897	4.53112e-06	0.00148645	0.00200827	IMPC_CBC_008_001___1 point	Clinical Chemistry	Total bilirubin	IMPC_CBC_008_001	20	20	19	20	significant	Different size	IMPC_CBC_008_001	_0048_183
78010	ONLI_1162	Oxylipins	Hydroxyeicosatetraenoic acids	12S-HETE	ZNHVWPKMFKADKW-LQWMCKPYSA-N	5283155	CCCCC/C=C\C[C@@H](/C=C/C=C\C/C=C\CCCC(=O)O)O	0.689493	0.584448	0.735099	1.20681e-06	0.00859094	0.000222142	IMPC_CBC_008_001___1 point	Clinical Chemistry	Total bilirubin	IMPC_CBC_008_001	20	20	19	20	significant	Different size	IMPC_CBC_008_001	_0048_184
78217	ONLI_1164	Oxylipins	Hydroxyeicosatetraenoic acids	11-HETE	GCZRCCHPLVMMJE-RSPKXIRXSA-N	5312981	CCCCC/C=C\C=C/[C@@H](C/C=C\C/C=C/CCCC(=O)O)O	0.627899	0.774399	0.552106	1.87757e-05	9.94234e-05	0.0116011	IMPC_CBC_008_001___1 point	Clinical Chemistry	Total bilirubin	IMPC_CBC_008_001	20	20	19	20	significant	Different size	IMPC_CBC_008_001	_0048_186
1535	ONLI_0019	gctof	Dicarboxylic acids and derivatives	succinic acid	KDYFGRWQOYBRFD-UHFFFAOYSA-N	1110	C(CC(=O)O)C(=O)O	0.557651	0.522001	0.534035	0.000185268	0.0182335	0.0152913	IMPC_CBC_009_001___1 point	Clinical Chemistry	Calcium	IMPC_CBC_009_001	20	20	20	20	significant	Different size	IMPC_CBC_009_001	_0049_5
4248	ONLI_0051	gctof	Beta hydroxy acids and derivatives	malic acid	BJEPYKJPYRNKOW-UHFFFAOYSA-N	525	C(C(C(=O)O)O)C(=O)O	0.730403	0.694998	0.728093	8.80981e-08	0.000670807	0.000273117	IMPC_CBC_009_001___1 point	Clinical Chemistry	Calcium	IMPC_CBC_009_001	20	20	20	20	significant	Different size	IMPC_CBC_009_001	_0049_16
7420	ONLI_0088	gctof	Dicarboxylic acids and derivatives	fumaric acid	VZCYOOQTPOCHFL-OWOJBTEDSA-N	444972	C(=C/C(=O)O)\C(=O)O	0.606154	0.667168	0.515983	3.39371e-05	0.00131175	0.0198653	IMPC_CBC_009_001___1 point	Clinical Chemistry	Calcium	IMPC_CBC_009_001	20	20	20	20	significant	Different size	IMPC_CBC_009_001	_0049_25
9120	ONLI_0110	gctof	Gamma-keto acids and derivatives	alpha-ketoglutarate	KPGXRSRHYNQIFN-UHFFFAOYSA-N	51	C(CC(=O)O)C(=O)C(=O)O	0.59605	0.596465	0.557352	4.94406e-05	0.00550405	0.010677	IMPC_CBC_009_001___1 point	Clinical Chemistry	Calcium	IMPC_CBC_009_001	20	20	20	20	significant	Different size	IMPC_CBC_009_001	_0049_32
9618	ONLI_0116	gctof	Tryptamines and derivatives	5-methoxytryptamine	JTEJPPKMYBDEMY-UHFFFAOYSA-N	1833	COC1=CC2=C(C=C1)NC=C2CCN	0.514144	0.504701	0.549831	0.000689569	0.0232373	0.0120215	IMPC_CBC_009_001___1 point	Clinical Chemistry	Calcium	IMPC_CBC_009_001	20	20	20	20	significant	Different size	IMPC_CBC_009_001	_0049_33
46424	ONLI_0569	CSHNEG	Sphingomyelins	SM d34:2; SM d18:2/16:0;	YLWSJLLZUHSIEA-CKSUKHGVSA-N	52931235	CCCCCCCCCCCCCCCC(=O)N[C@@H](COP(=O)([O-])OCC[N+](C)(C)C)[C@@H](/C=C/CCCCCCCC/C=C\CCC)O	-0.224599	-0.596465	-0.482136	0.163523	0.00550405	0.031334	IMPC_CBC_009_001___1 point	Clinical Chemistry	Calcium	IMPC_CBC_009_001	20	20	20	20	significant	Different size	IMPC_CBC_009_001	_0049_52
58722	ONLI_0750	HILICPOS	Dipeptides	Lys-Val	YQAIUOWPSUOINN-UHFFFAOYSA-N	140709	CC(C)C(C(=O)O)NC(=O)C(CCCCN)N	0.508397	0.499436	0.480632	0.000809833	0.0249587	0.0319436	IMPC_CBC_009_001___1 point	Clinical Chemistry	Calcium	IMPC_CBC_009_001	20	20	20	20	significant	Different size	IMPC_CBC_009_001	_0049_69
62017	ONLI_0808	HILICPOS	Hydroxyindoles	N-Acetyl-5-hydroxytryptamine	MVAWJSIDNICKHF-UHFFFAOYSA-N	903	CC(=O)NCCC1=CNC2=C1C=C(C=C2)O	0.623375	0.585345	0.592275	4.8809e-05	0.00846522	0.0122424	IMPC_CBC_009_001___1 point	Clinical Chemistry	Calcium	IMPC_CBC_009_001	19	17	20	20	significant	Different size	IMPC_CBC_009_001	_0049_83
63010	ONLI_0819	HILICPOS	Gamma amino acids and derivatives	4-Acetamidobutyric acid	UZTFMUBKZQVKLK-UHFFFAOYSA-N	18189	CC(=O)NCCCC(=O)O	0.629046	0.571644	0.673938	1.37731e-05	0.00845876	0.00112142	IMPC_CBC_009_001___1 point	Clinical Chemistry	Calcium	IMPC_CBC_009_001	20	20	20	20	significant	Different size	IMPC_CBC_009_001	_0049_86
75613	ONLI_1125	Oxylipins	Thromboxanes	TXB2	XNRNNGPBEPRNAR-JQBLCGNGSA-N	5283137	CCCCC[C@@H](/C=C/[C@@H]1[C@H]([C@H](CC(O1)O)O)C/C=C\CCCC(=O)O)O	0.633119	0.663724	0.613121	7.6784e-05	0.00505512	0.00886606	IMPC_CBC_009_001___1 point	Clinical Chemistry	Calcium	IMPC_CBC_009_001	16	17	20	20	significant	Different size	IMPC_CBC_009_001	_0049_112
77916	ONLI_1161	Oxylipins	Hydroxyeicosatetraenoic acids	15-HETE	JSFATNQSLKRBCI-VAEKSGALSA-N	5280724	CCCCC[C@@H](/C=C/C=C\C/C=C\C/C=C\CCCC(=O)O)O	0.470116	0.48006	0.487401	0.00220651	0.0321776	0.0292721	IMPC_CBC_009_001___1 point	Clinical Chemistry	Calcium	IMPC_CBC_009_001	20	20	20	20	significant	Different size	IMPC_CBC_009_001	_0049_115
2130	ONLI_0002	gctof	Pentoses	xylose	SRBFZHDQGSBBOR-IOVATXLUSA-N	135191	C1[C@H]([C@@H]([C@H](C(O1)O)O)O)O	0.535755	0.503576	0.481384	0.000367049	0.023597	0.0316376	IMPC_CBC_010_001___1 point	Clinical Chemistry	Phosphorus	IMPC_CBC_010_001	20	20	20	20	significant	Different size	IMPC_CBC_010_001	_0050_1
7137	ONLI_0008	gctof	Pyrimidones	uracil	ISAKRJDGNUQOIC-UHFFFAOYSA-N	1174	C1=CNC(=O)NC1=O	0.546547	0.465187	0.547574	0.000263593	0.0387529	0.0124504	IMPC_CBC_010_001___1 point	Clinical Chemistry	Phosphorus	IMPC_CBC_010_001	20	20	20	20	significant	Different size	IMPC_CBC_010_001	_0050_2
1725	ONLI_0022	gctof	Glucuronic acid derivatives	saccharic acid	DSLZVSRJTYRBFB-LLEIAEIESA-N	33037	[C@H]([C@@H]([C@@H](C(=O)O)O)O)([C@H](C(=O)O)O)O	0.443037	0.526158	0.449793	0.00419666	0.0171701	0.0466093	IMPC_CBC_010_001___1 point	Clinical Chemistry	Phosphorus	IMPC_CBC_010_001	20	20	20	20	significant	Different size	IMPC_CBC_010_001	_0050_7
62910	ONLI_0818	HILICPOS	Ureas	3-Ureidopropionic acid	JSJWCHRYRHKBBW-UHFFFAOYSA-N	111	C(CNC(=O)N)C(=O)O	0.589809	0.486263	0.616773	6.19876e-05	0.0297086	0.00377271	IMPC_CBC_010_001___1 point	Clinical Chemistry	Phosphorus	IMPC_CBC_010_001	20	20	20	20	significant	Different size	IMPC_CBC_010_001	_0050_142
77010	ONLI_1147	Oxylipins	Hydroxyeicosatrienoic acids	5,6-DiHETrE	GFNYAPAJUNPMGH-QNEBEIHSSA-N	5283142	CCCCC/C=C\C/C=C\C/C=C\CC(C(CCCC(=O)O)O)O	-0.240873	-0.458208	-0.566215	0.134328	0.0421761	0.00925217	IMPC_CBC_010_001___1 point	Clinical Chemistry	Phosphorus	IMPC_CBC_010_001	20	20	20	20	significant	Different size	IMPC_CBC_010_001	_0050_177
78411	ONLI_1166	Oxylipins	Hydroxyeicosatetraenoic acids	5-HETE	KGIJOOYOSFUGPC-JGKLHWIESA-N	5280733	CCCCC/C=C\C/C=C\C/C=C\C=C\[C@H](CCCC(=O)O)O	-0.564095	-0.54046	-0.607747	0.000150113	0.0138847	0.00447598	IMPC_CBC_010_001___1 point	Clinical Chemistry	Phosphorus	IMPC_CBC_010_001	20	20	20	20	significant	Different size	IMPC_CBC_010_001	_0050_181
7996	ONLI_1186	Oxylipins	Hepoxilins	11,12-EpETrE	DXOYQVHGIODESM-IQCOFVSKSA-N	53480479	CCCCC/C=C/CC1C(O1)C/C=C\C/C=C/CCCC(=O)O	-0.169874	-0.553256	-0.481525	0.294661	0.0113932	0.0315807	IMPC_CBC_010_001___1 point	Clinical Chemistry	Phosphorus	IMPC_CBC_010_001	20	20	20	20	significant	Different size	IMPC_CBC_010_001	_0050_185
3138	ONLI_0039	gctof	Long-chain fatty acids	palmitic acid	IPCSVZSSVZVIGE-UHFFFAOYSA-N	985	CCCCCCCCCCCCCCCC(=O)O	-0.498687	-0.464662	-0.545865	0.00121629	0.04054	0.0141083	IMPC_CBC_012_001___1 point	Clinical Chemistry	Aspartate aminotransferase	IMPC_CBC_012_001	20	20	20	20	significant	Different size	IMPC_CBC_012_001	_0051_7
17511	ONLI_0226	CSHPOS	Triacylglycerols	TAG 50:5; TAG 14:0-18:2-18:3;	BVZCCLFFAYZNFZ-QLFKCXFRSA-N	131753671	CCCCCCCCCCCCCC(=O)OC[C@@H](COC(=O)CCCCCCC/C=C\C/C=C\C/C=C\CC)OC(=O)CCCCCCC/C=C\C/C=C\CCCCC	-0.453659	-0.47218	-0.46015	0.00358459	0.0370929	0.0427264	IMPC_CBC_012_001___1 point	Clinical Chemistry	Aspartate aminotransferase	IMPC_CBC_012_001	20	20	20	20	significant	Different size	IMPC_CBC_012_001	_0051_48
32412	ONLI_0386	CSHPOS	Triacylglycerols	TAG 52:4; TAG 16:0-18:2-18:2;	LXAWUIOWWNQCQA-QOFSRLOCSA-N	97042228	CCCCCCCCCCCCCCCC(=O)OC[C@@H](COC(=O)CCCCCCC/C=C\C/C=C\CCCCC)OC(=O)CCCCCCC/C=C\C/C=C\CCCCC	-0.538086	-0.490226	-0.515789	0.000419474	0.0297617	0.0214037	IMPC_CBC_012_001___1 point	Clinical Chemistry	Aspartate aminotransferase	IMPC_CBC_012_001	20	20	20	20	significant	Different size	IMPC_CBC_012_001	_0051_99
66112	ONLI_0861	HILICPOS	2-arylethylamines	Histamine	NTYJJOPFIAHURM-UHFFFAOYSA-N	774	C1=C(NC=N1)CCN	0.558537	0.630075	0.47218	0.000229735	0.00358436	0.0370929	IMPC_CBC_012_001___1 point	Clinical Chemistry	Aspartate aminotransferase	IMPC_CBC_012_001	20	20	20	20	significant	Different size	IMPC_CBC_012_001	_0051_173
77917	ONLI_1161	Oxylipins	Hydroxyeicosatetraenoic acids	15-HETE	JSFATNQSLKRBCI-VAEKSGALSA-N	5280724	CCCCC[C@@H](/C=C/C=C\C/C=C\C/C=C\CCCC(=O)O)O	0.600525	0.713802	0.469173	4.19171e-05	0.000408629	0.0384427	IMPC_CBC_012_001___1 point	Clinical Chemistry	Aspartate aminotransferase	IMPC_CBC_012_001	20	20	20	20	significant	Different size	IMPC_CBC_012_001	_0051_193
78012	ONLI_1162	Oxylipins	Hydroxyeicosatetraenoic acids	12S-HETE	ZNHVWPKMFKADKW-LQWMCKPYSA-N	5283155	CCCCC/C=C\C[C@@H](/C=C/C=C\C/C=C\CCCC(=O)O)O	0.581801	0.661654	0.485714	0.000110656	0.00194129	0.0314755	IMPC_CBC_012_001___1 point	Clinical Chemistry	Aspartate aminotransferase	IMPC_CBC_012_001	20	20	20	20	significant	Different size	IMPC_CBC_012_001	_0051_194
1840	ONLI_0023	gctof	Pentoses	ribose	HMFHBZSHGGEWLO-SOOFDHNKSA-N	5779	C([C@@H]1[C@H]([C@H](C(O1)O)O)O)O	0.569083	0.798044	0.446617	0.000127173	2.4836e-05	0.0498458	IMPC_CBC_013_001___1 point	Clinical Chemistry	Alanine aminotransferase	IMPC_CBC_013_001	20	20	20	20	significant	Different size	IMPC_CBC_013_001	_0052_5
8016	ONLI_0094	gctof	1,2-aminoalcohols	D-erythro-sphingosine	WWUZIQQURGPMPG-KRWOKUGFSA-N	5280335	CCCCCCCCCCCCC/C=C/[C@H]([C@H](CO)N)O	-0.552006	-0.476871	-0.66015	0.000221984	0.033508	0.00200192	IMPC_CBC_013_001___1 point	Clinical Chemistry	Alanine aminotransferase	IMPC_CBC_013_001	20	20	20	20	significant	Different size	IMPC_CBC_013_001	_0052_23
9121	ONLI_0110	gctof	Gamma-keto acids and derivatives	alpha-ketoglutarate	KPGXRSRHYNQIFN-UHFFFAOYSA-N	51	C(CC(=O)O)C(=O)C(=O)O	0.547246	0.536292	0.505263	0.000257897	0.0147847	0.0245795	IMPC_CBC_013_001___1 point	Clinical Chemistry	Alanine aminotransferase	IMPC_CBC_013_001	20	20	20	20	significant	Different size	IMPC_CBC_013_001	_0052_25
32823	ONLI_0390	CSHPOS	1-acyl-sn-glycero-3-phosphocholines	LPC 22:0	UIINDYGXBHJQHX-GDLZYMKVSA-N	24779479	CCCCCCCCCCCCCCCCCCCCCC(=O)OC[C@H](COP(=O)([O-])OCC[N+](C)(C)C)O	-0.0485104	-0.449793	-0.497744	0.766273	0.0466093	0.0270715	IMPC_CBC_013_001___1 point	Clinical Chemistry	Alanine aminotransferase	IMPC_CBC_013_001	20	20	20	20	significant	Different size	IMPC_CBC_013_001	_0052_85
49511	ONLI_0604	CSHNEG	Phosphatidylcholines	16:0-20:4 PC	IIZPXYDJLKNOIY-JXPKJXOSSA-N	10747814	CCCCCCCCCCCCCCCC(=O)OC[C@H](COP(=O)([O-])OCC[N+](C)(C)C)OC(=O)CCC/C=C\C/C=C\C/C=C\C/C=C\CCCCC	0.561952	0.652125	0.469173	0.000161074	0.00183365	0.0384427	IMPC_CBC_013_001___1 point	Clinical Chemistry	Alanine aminotransferase	IMPC_CBC_013_001	20	20	20	20	significant	Different size	IMPC_CBC_013_001	_0052_121
56513	ONLI_0710	HILICPOS	Hydroxyindoles	5-Hydroxytryptophol	KQROHCSYOGBQGJ-UHFFFAOYSA-N	9061	C1=CC2=C(C=C1O)C(=CN2)CCO	0.549097	0.635577	0.604511	0.000243353	0.00259826	0.00563412	IMPC_CBC_013_001___1 point	Clinical Chemistry	Alanine aminotransferase	IMPC_CBC_013_001	20	20	20	20	significant	Different size	IMPC_CBC_013_001	_0052_144
66011	ONLI_0860	HILICPOS	Purine nucleosides	Guanosine	NYHBQMYGNKIUIF-UUOKFMHZSA-N	135398635	C1=NC2=C(N1[C@H]3[C@@H]([C@@H]([C@H](O3)CO)O)O)N=C(NC2=O)N	0.570514	0.721212	0.52807	0.00123115	0.0241946	0.0217395	IMPC_CBC_013_001___1 point	Clinical Chemistry	Alanine aminotransferase	IMPC_CBC_013_001	10	19	20	20	significant	Different size	IMPC_CBC_013_001	_0052_176
66113	ONLI_0861	HILICPOS	2-arylethylamines	Histamine	NTYJJOPFIAHURM-UHFFFAOYSA-N	774	C1=C(NC=N1)CCN	0.460145	0.608499	0.487218	0.00281274	0.00441352	0.0308957	IMPC_CBC_013_001___1 point	Clinical Chemistry	Alanine aminotransferase	IMPC_CBC_013_001	20	20	20	20	significant	Different size	IMPC_CBC_013_001	_0052_177
68520	ONLI_0893	HILICPOS	Organosulfonic acids	Taurine	XOAAWQZATWQOTB-UHFFFAOYSA-N	1123	C(CS(=O)(=O)O)N	0.598546	0.551335	0.529323	4.51064e-05	0.0117422	0.0178155	IMPC_CBC_013_001___1 point	Clinical Chemistry	Alanine aminotransferase	IMPC_CBC_013_001	20	20	20	20	significant	Different size	IMPC_CBC_013_001	_0052_179
77918	ONLI_1161	Oxylipins	Hydroxyeicosatetraenoic acids	15-HETE	JSFATNQSLKRBCI-VAEKSGALSA-N	5280724	CCCCC[C@@H](/C=C/C=C\C/C=C\C/C=C\CCCC(=O)O)O	0.554873	0.714823	0.577444	0.000202591	0.000397347	0.0087704	IMPC_CBC_013_001___1 point	Clinical Chemistry	Alanine aminotransferase	IMPC_CBC_013_001	20	20	20	20	significant	Different size	IMPC_CBC_013_001	_0052_197
78013	ONLI_1162	Oxylipins	Hydroxyeicosatetraenoic acids	12S-HETE	ZNHVWPKMFKADKW-LQWMCKPYSA-N	5283155	CCCCC/C=C\C[C@@H](/C=C/C=C\C/C=C\CCCC(=O)O)O	0.497584	0.512975	0.581955	0.00108765	0.0207237	0.0081662	IMPC_CBC_013_001___1 point	Clinical Chemistry	Alanine aminotransferase	IMPC_CBC_013_001	20	20	20	20	significant	Different size	IMPC_CBC_013_001	_0052_198
78220	ONLI_1164	Oxylipins	Hydroxyeicosatetraenoic acids	11-HETE	GCZRCCHPLVMMJE-RSPKXIRXSA-N	5312981	CCCCC/C=C\C=C/[C@@H](C/C=C\C/C=C/CCCC(=O)O)O	0.52759	0.700038	0.561865	0.000468098	0.000589482	0.00993078	IMPC_CBC_013_001___1 point	Clinical Chemistry	Alanine aminotransferase	IMPC_CBC_013_001	20	20	20	20	significant	Different size	IMPC_CBC_013_001	_0052_200
12118	ONLI_0168	CSHPOS	Phosphatidylcholines	PC36:1	ATHVAWFAEPLPPQ-VRDBWYNSSA-N	24778825	CCCCCCCCCCCCCCCCCC(=O)OC[C@H](COP(=O)([O-])OCC[N+](C)(C)C)OC(=O)CCCCCCC/C=C\CCCCCCCC	0.826946	0.595185	0.765701	4.84262e-11	0.00563208	8.32022e-05	IMPC_CBC_015_001___1 point	Clinical Chemistry	Total cholesterol	IMPC_CBC_015_001	20	20	20	20	significant	Different size	IMPC_CBC_015_001	_0054_32
13115	ONLI_0179	CSHPOS	Phosphatidylcholines	PC40:7 A	BPUROMFCPFGBOT-ZEGPSQTJSA-N	24778982	CCCCC/C=C\C/C=C\CCCCCCCC(=O)OC[C@H](COP(=O)([O-])OCC[N+](C)(C)C)OC(=O)CC/C=C\C/C=C\C/C=C\C/C=C\C/C=C\CCCCC	0.840644	0.567344	0.807823	1.14716e-11	0.00908238	1.65099e-05	IMPC_CBC_015_001___1 point	Clinical Chemistry	Total cholesterol	IMPC_CBC_015_001	20	20	20	20	significant	Different size	IMPC_CBC_015_001	_0054_35
15813	ONLI_0207	CSHPOS	Phosphatidylcholines	PC(18:0/22:6(4Z,7Z,10Z,13Z,16Z,19Z)	FAUYAENFVCNTAL-PFFNLMTBSA-N	24778876	CCCCCCCCCCCCCCCCCC(=O)OC[C@H](COP(=O)([O-])OCC[N+](C)(C)C)OC(=O)CC/C=C\C/C=C\C/C=C\C/C=C\C/C=C\C/C=C\CC	0.287376	0.532732	0.74088	0.0721716	0.0155903	0.000186431	IMPC_CBC_015_001___1 point	Clinical Chemistry	Total cholesterol	IMPC_CBC_015_001	20	20	20	20	significant	Different size	IMPC_CBC_015_001	_0054_46
1765	ONLI_0227	CSHPOS	1-acyl-sn-glycero-3-phosphocholines	LPC 20:4	GOMVPVRDBLLHQC-VEJNOCSESA-N	53480469	CC/C=C\C/C=C\C/C=C\C/C=C\CCCCCCC(=O)OC[C@H](COP(=O)([O-])OCC[N+](C)(C)C)O	-0.157996	0.48608	0.661903	0.330205	0.0297792	0.00147795	IMPC_CBC_015_001___1 point	Clinical Chemistry	Total cholesterol	IMPC_CBC_015_001	20	20	20	20	significant	Different size	IMPC_CBC_015_001	_0054_53
1994	ONLI_0252	CSHPOS	Cholesteryl esters	CE (20:4)	IMXSFYNMSOULQS-BEDFLICRSA-N	6479222	CCCCC/C=C\C/C=C\C/C=C\C/C=C\CCCC(=O)O[C@H]1CC[C@@]2([C@H]3CC[C@]4([C@H]([C@@H]3CC=C2C1)CC[C@@H]4[C@H](C)CCCC(C)C)C)C	0.320964	0.571106	0.500188	0.0434491	0.00853472	0.0247068	IMPC_CBC_015_001___1 point	Clinical Chemistry	Total cholesterol	IMPC_CBC_015_001	20	20	20	20	significant	Different size	IMPC_CBC_015_001	_0054_67
22129	ONLI_0275	CSHPOS	Phosphatidylcholines	PC16:0/16:0	KILNVBDSWZSGLL-KXQOOQHDSA-N	452110	CCCCCCCCCCCCCCCC(=O)OC[C@H](COP(=O)([O-])OCC[N+](C)(C)C)OC(=O)CCCCCCCCCCCCCCC	0.707604	0.501129	0.771719	3.29576e-07	0.0243945	6.7428e-05	IMPC_CBC_015_001___1 point	Clinical Chemistry	Total cholesterol	IMPC_CBC_015_001	20	20	20	20	significant	Different size	IMPC_CBC_015_001	_0054_79
22320	ONLI_0277	CSHPOS	Phosphatidylcholines	PC38:3	KNNHXKQRTYEWCA-HYYWERRFSA-N	53478919	CCCCCC/C=C\CCCCCCCCCC(=O)O[C@H](COC(=O)CCCCCCCCC/C=C\C/C=C\CCCCC)COP(=O)([O-])OCC[N+](C)(C)C	0.849463	0.654628	0.81384	4.2174e-12	0.00173641	1.26943e-05	IMPC_CBC_015_001___1 point	Clinical Chemistry	Total cholesterol	IMPC_CBC_015_001	20	20	20	20	significant	Different size	IMPC_CBC_015_001	_0054_81
22810	ONLI_0283	CSHPOS	Phosphosphingolipids	SMd32:1	KYICBZWZQPCUMO-PSALXKTOSA-N	11433862	CCCCCCCCCCCCC/C=C/[C@H]([C@H](COP(=O)([O-])OCC[N+](C)(C)C)NC(=O)CCCCCCCCCCCCC)O	0.0572313	0.674191	0.498684	0.725759	0.00111476	0.0252126	IMPC_CBC_015_001___1 point	Clinical Chemistry	Total cholesterol	IMPC_CBC_015_001	20	20	20	20	significant	Different size	IMPC_CBC_015_001	_0054_83
24513	ONLI_0302	CSHPOS	Sphingomyelins	SMd38:2	MDRFMTLYKHBJTF-NQYLGBTJSA-N	52931179	CCCCCCCCCCCCC/C=C/[C@H]([C@H](COP(=O)([O-])OCC[N+](C)(C)C)NC(=O)CCCCCCCCC/C=C\CCCCCCCC)O	0.796547	0.506396	0.708537	7.88974e-10	0.0227037	0.000471242	IMPC_CBC_015_001___1 point	Clinical Chemistry	Total cholesterol	IMPC_CBC_015_001	20	20	20	20	significant	Different size	IMPC_CBC_015_001	_0054_92
25011	ONLI_0308	CSHPOS	Cholesteryl esters	CE (20:3)	MLPRJPSMAFZPLA-PJSAOELNSA-N	53477892	CCCCC/C=C\C/C=C\C/C=C\CCCCCCC(=O)O[C@H]1CC[C@@]2(C3CC[C@]4(C(C3CC=C2C1)CCC4[C@H](C)CCCC(C)C)C)C	0.646808	0.468021	0.750658	6.49872e-06	0.0374256	0.000137165	IMPC_CBC_015_001___1 point	Clinical Chemistry	Total cholesterol	IMPC_CBC_015_001	20	20	20	20	significant	Different size	IMPC_CBC_015_001	_0054_95
25715	ONLI_0316	CSHPOS	Phosphosphingolipids	SMd36:2	NBEADXWAAWCCDG-QDDWGVBQSA-N	6443882	CCCCCCCCCCCCC/C=C/[C@H]([C@H](COP(=O)([O-])OCC[N+](C)(C)C)NC(=O)CCCCCCC/C=C\CCCCCCCC)O	-0.325374	0.52295	0.444528	0.0404901	0.0179862	0.0495599	IMPC_CBC_015_001___1 point	Clinical Chemistry	Total cholesterol	IMPC_CBC_015_001	20	20	20	20	significant	Different size	IMPC_CBC_015_001	_0054_97
26415	ONLI_0323	CSHPOS	Phosphatidylcholines	PC 36:0; PC 18:0-18:0;	NRJAVPSFFCBXDT-HUESYALOSA-N	94190	CCCCCCCCCCCCCCCCCC(=O)OC[C@H](COP(=O)([O-])OCC[N+](C)(C)C)OC(=O)CCCCCCCCCCCCCCCCC	-0.254257	0.637321	0.587439	0.113372	0.00250688	0.00645994	IMPC_CBC_015_001___1 point	Clinical Chemistry	Total cholesterol	IMPC_CBC_015_001	20	20	20	20	significant	Different size	IMPC_CBC_015_001	_0054_100
27120	ONLI_0330	CSHPOS	Phosphatidylcholines	PC37:3	WZCLAXMADUBPSG-RIXBAXMTSA-N	52922657	CCCCCCCCCCCCCCCCCC(=O)OC[C@H](COP(=O)([O-])OCC[N+](C)(C)C)OC(=O)CCCCCCC/C=C\C/C=C\C/C=C\CC	0.780222	0.449963	0.676946	2.93048e-09	0.0465167	0.00104462	IMPC_CBC_015_001___1 point	Clinical Chemistry	Total cholesterol	IMPC_CBC_015_001	20	20	20	20	significant	Different size	IMPC_CBC_015_001	_0054_103
28023	ONLI_0339	CSHPOS	1-(1Z-alkenyl),2-acyl-glycerophosphocholines	PCp-40:7 or PC o-40:8	PWAHARWXEAMNGK-VCDFOAEJSA-N	53480839	CCCCCCCC/C=C\CCCCCC/C=C\OC[C@H](COP(=O)([O-])OCC[N+](C)(C)C)OC(=O)CC/C=C\C/C=C\C/C=C\C/C=C\C/C=C\C/C=C\CC	0.724492	0.480813	0.605491	1.25579e-07	0.0318698	0.00466776	IMPC_CBC_015_001___1 point	Clinical Chemistry	Total cholesterol	IMPC_CBC_015_001	20	20	20	20	significant	Different size	IMPC_CBC_015_001	_0054_107
28323	ONLI_0342	CSHPOS	Phosphatidylcholines	PC34:0	PZNPLUBHRSSFHT-RRHRGVEJSA-N	24778686	CCCCCCCCCCCCCCCCCC(=O)O[C@H](COC(=O)CCCCCCCCCCCCCCC)COP(=O)([O-])OCC[N+](C)(C)C	0.159966	0.537999	0.609252	0.324132	0.0144106	0.00435178	IMPC_CBC_015_001___1 point	Clinical Chemistry	Total cholesterol	IMPC_CBC_015_001	20	20	20	20	significant	Different size	IMPC_CBC_015_001	_0054_108
28720	ONLI_0346	CSHPOS	Phosphatidylcholines	PC 32:1; PC 16:0-16:1;	QIBZFHLFHCIUOT-NPBIGWJUSA-N	6443788	CCCCCCCCCCCCCCCC(=O)OC[C@H](COP(=O)([O-])OCC[N+](C)(C)C)OC(=O)CCCCCCC/C=C\CCCCCC	0.819815	0.48307	0.797292	9.76084e-11	0.0309602	2.56052e-05	IMPC_CBC_015_001___1 point	Clinical Chemistry	Total cholesterol	IMPC_CBC_015_001	20	20	20	20	significant	Different size	IMPC_CBC_015_001	_0054_109
31714	ONLI_0379	CSHPOS	Phosphatidylcholines	PC38:5 A	SUACBSWYGWBPFC-GPUJSUHJSA-N	52923235	CCCCC/C=C\C/C=C\CCCCCCCC(=O)O[C@H](COC(=O)CCCCCC/C=C\C/C=C\C/C=C\CCCCC)COP(=O)([O-])OCC[N+](C)(C)C	0.755923	0.501881	0.660399	1.70425e-08	0.0241471	0.00152856	IMPC_CBC_015_001___1 point	Clinical Chemistry	Total cholesterol	IMPC_CBC_015_001	20	20	20	20	significant	Different size	IMPC_CBC_015_001	_0054_121
3379	ONLI_0399	CSHPOS	Cholesteryl esters	CE (22:6)	VOEVEGPMRIYYKC-IWVSHIRDSA-N	53477890	CC/C=C\C/C=C\C/C=C\C/C=C\C/C=C\C/C=C\CCC(=O)O[C@H]1CC[C@@]2(C3CC[C@]4(C(C3CC=C2C1)CCC4[C@H](C)CCCC(C)C)C)C	0.680396	0.553048	0.708537	1.36476e-06	0.0114307	0.000471242	IMPC_CBC_015_001___1 point	Clinical Chemistry	Total cholesterol	IMPC_CBC_015_001	20	20	20	20	significant	Different size	IMPC_CBC_015_001	_0054_133
36517	ONLI_0427	CSHPOS	1-acyl-sn-glycero-3-phosphocholines	LPC 20:3 b	XUDGAAFUMTTZCO-QNEBEIHSSA-N	138300357	CC/C=C\C/C=C\C/C=C\CCCCCCCCCC(=O)OCC(COP(=O)([O-])OCC[N+](C)(C)C)O	0.73425	0.448458	0.765701	6.96013e-08	0.0473446	8.32022e-05	IMPC_CBC_015_001___1 point	Clinical Chemistry	Total cholesterol	IMPC_CBC_015_001	20	20	20	20	significant	Different size	IMPC_CBC_015_001	_0054_144
36620	ONLI_0428	CSHPOS	1-acyl,2-(1Z-alkenyl)-glycerophosphocholines	PCo-40:7 A	XUVCLJCZWPTAIO-OAKHYACESA-N	53479405	CCCCCCCC/C=C\CCCCCC/C=C\OC(COC(=O)CCCCC/C=C\C/C=C\C/C=C\C/C=C\C/C=C\CC)COP(=O)([O-])OCC[N+](C)(C)C	0.828541	0.604966	0.680707	4.1219e-11	0.0047133	0.000954903	IMPC_CBC_015_001___1 point	Clinical Chemistry	Total cholesterol	IMPC_CBC_015_001	20	20	20	20	significant	Different size	IMPC_CBC_015_001	_0054_145
37017	ONLI_0433	CSHPOS	1-acyl-sn-glycero-3-phosphocholines	LPC 18:1	YAMUFBLWGFFICM-PTGWMXDISA-N	16081932	CCCCCCCC/C=C\CCCCCCCC(=O)OC[C@H](COP(=O)([O-])OCC[N+](C)(C)C)O	0.759488	0.455982	0.790523	1.33343e-08	0.0433157	3.35087e-05	IMPC_CBC_015_001___1 point	Clinical Chemistry	Total cholesterol	IMPC_CBC_015_001	20	20	20	20	significant	Different size	IMPC_CBC_015_001	_0054_148
37922	ONLI_0442	CSHPOS	1-(1Z-alkenyl),2-acyl-glycerophosphocholines	PCo-38:5 A	YPAPIRJFGNBODV-AMFPDOHCSA-N	53480715	CCCCCCCCCCCCCCCC/C=C\OCC(COP(=O)([O-])OCC[N+](C)(C)C)OC(=O)CCCCCC/C=C\C/C=C\C/C=C\C/C=C\CC	0.783694	0.575621	0.471606	2.23799e-09	0.00791339	0.0357981	IMPC_CBC_015_001___1 point	Clinical Chemistry	Total cholesterol	IMPC_CBC_015_001	20	20	20	20	significant	Different size	IMPC_CBC_015_001	_0054_155
5078	ONLI_0619	CSHNEG	Sphingomyelins	SM d40:3; SM d14:1/26:2;	FMJPKVXVBYILLP-FTRJIJDXSA-N	52931199	CCCCCCCC/C=C\CCCCCCCCCCCC(=O)N[C@@H](COP(=O)([O-])OCC[N+](C)(C)C)[C@@H](/C=C/CCCCCCCC/C=C\CCC)O	0.832481	0.465764	0.709289	2.74846e-11	0.0384797	0.000461827	IMPC_CBC_015_001___1 point	Clinical Chemistry	Total cholesterol	IMPC_CBC_015_001	20	20	20	20	significant	Different size	IMPC_CBC_015_001	_0054_217
52517	ONLI_0645	CSHNEG	Phosphatidylcholines	PC 38:7; PC 16:1-22:6;	DLRNZUPJXRVWRW-FKZZUUMNSA-N	24778773	CCCCCC/C=C\CCCCCCCC(=O)OC[C@H](COP(=O)([O-])OCC[N+](C)(C)C)OC(=O)CC/C=C\C/C=C\C/C=C\C/C=C\C/C=C\C/C=C\CC	0.847493	0.541008	0.663407	5.3026e-12	0.0137695	0.00142875	IMPC_CBC_015_001___1 point	Clinical Chemistry	Total cholesterol	IMPC_CBC_015_001	20	20	20	20	significant	Different size	IMPC_CBC_015_001	_0054_229
53011	ONLI_0651	CSHNEG	Phosphatidylcholines	PC 38:5; PC 18:1-20:4;	SWOKEJBWARJLGN-ORKYUJCWSA-N	53478767	CCCCCCCC/C=C\CCCCCCCC(=O)OC[C@H](COP(=O)([O-])OCC[N+](C)(C)C)OC(=O)CCCCCC/C=C\C/C=C\C/C=C\C/C=C\CC	0.751138	0.543266	0.776984	2.35369e-08	0.0133039	5.58098e-05	IMPC_CBC_015_001___1 point	Clinical Chemistry	Total cholesterol	IMPC_CBC_015_001	20	20	20	20	significant	Different size	IMPC_CBC_015_001	_0054_232
53518	ONLI_0657	CSHNEG	Phosphatidylcholines	PC 38:3	QXDDDGCNWRUEFM-UMKMFDOBSA-N	24778855	CCCCCCCCCCCCCCCCCC(=O)OC[C@H](COP(=O)([O-])OCC[N+](C)(C)C)OC(=O)CCC/C=C\C/C=C\C/C=C\CCCCCCCC	0.791669	0.527464	0.807823	1.18203e-09	0.0168463	1.65099e-05	IMPC_CBC_015_001___1 point	Clinical Chemistry	Total cholesterol	IMPC_CBC_015_001	20	20	20	20	significant	Different size	IMPC_CBC_015_001	_0054_235
53619	ONLI_0658	CSHNEG	Phosphatidylcholines	PC 38:3; PC 18:0-20:3;	VGSUMLIRUGDCTF-NSMRCOLJSA-N	24778857	CCCCCCCCCCCCCCCCCC(=O)OC[C@H](COP(=O)([O-])OCC[N+](C)(C)C)OC(=O)CCCCCC/C=C\C/C=C\C/C=C\CCCCC	0.792232	0.554552	0.807823	1.12878e-09	0.0111625	1.65099e-05	IMPC_CBC_015_001___1 point	Clinical Chemistry	Total cholesterol	IMPC_CBC_015_001	20	20	20	20	significant	Different size	IMPC_CBC_015_001	_0054_236
54622	ONLI_0670	CSHNEG	Phosphatidylinositols	PI 38:3; PI 18:0-20:3;	ZUGLBBVIAIBIKG-BZXCBJNASA-N	52928308	CCCCCCCCCCCCCCCCCC(=O)OC[C@H](COP(=O)(O)OC1C([C@@H](C(C(C1O)O)O)O)O)OC(=O)CCCCCC/C=C\C/C=C\C/C=C\CCCCC	0.801426	0.456735	0.819105	5.20837e-10	0.0429279	1.00086e-05	IMPC_CBC_015_001___1 point	Clinical Chemistry	Total cholesterol	IMPC_CBC_015_001	20	20	20	20	significant	Different size	IMPC_CBC_015_001	_0054_243
54816	ONLI_0672	CSHNEG	Phosphatidylcholines	PC 40:7; PC 18:1-22:6;	FPEVDFOXMCHLKL-KFDYCXSYSA-N	24778955	CCCCCCCC/C=C\CCCCCCCC(=O)OC[C@H](COP(=O)([O-])OCC[N+](C)(C)C)OC(=O)CC/C=C\C/C=C\C/C=C\C/C=C\C/C=C\C/C=C\CC	0.705728	0.479308	0.651373	3.65358e-07	0.0324877	0.00186375	IMPC_CBC_015_001___1 point	Clinical Chemistry	Total cholesterol	IMPC_CBC_015_001	20	20	20	20	significant	Different size	IMPC_CBC_015_001	_0054_245
54912	ONLI_0673	CSHNEG	Phosphatidylcholines	PC 40:6	FYVNIFOYDIIODX-KNKJIUSSSA-N	24778900	CCCCCC/C=C\CCCCCCCCCC(=O)OC[C@H](COP(=O)([O-])OCC[N+](C)(C)C)OC(=O)CCCCC/C=C\C/C=C\C/C=C\C/C=C\C/C=C\CC	0.212225	0.458239	0.71305	0.18861	0.0421602	0.000417115	IMPC_CBC_015_001___1 point	Clinical Chemistry	Total cholesterol	IMPC_CBC_015_001	20	20	20	20	significant	Different size	IMPC_CBC_015_001	_0054_246
55516	ONLI_0680	CSHNEG	Phosphatidylinositols	PI 40:5; PI 18:0-22:5;	QLABQLNIHHHJCI-FCGLMCRWSA-N	53480067	CCCCCCCCCCCCCCCCCC(=O)OC[C@H](COP(=O)(O)OC1C([C@@H](C(C(C1O)O)O)O)O)OC(=O)CCCCC/C=C\C/C=C\C/C=C\C/C=C\C/C=C\CC	0.863818	0.571106	0.889056	7.16325e-13	0.00853472	1.60651e-07	IMPC_CBC_015_001___1 point	Clinical Chemistry	Total cholesterol	IMPC_CBC_015_001	20	20	20	20	significant	Different size	IMPC_CBC_015_001	_0054_251
66314	ONLI_0863	HILICPOS	L-alpha-amino acids	Homoarginine	QUOGESRFPZDMMT-YFKPBYRVSA-N	9085	C(CCN=C(N)N)C[C@@H](C(=O)O)N	-0.774124	-0.544771	-0.470854	4.65175e-09	0.0130006	0.0361349	IMPC_CBC_015_001___1 point	Clinical Chemistry	Total cholesterol	IMPC_CBC_015_001	20	20	20	20	significant	Different size	IMPC_CBC_015_001	_0054_286
6703	ONLI_0875	HILICPOS	Methionine and derivatives	N-Acetylmethionine	XUYPXLNMDZIRQH-UHFFFAOYSA-N	6180	CC(=O)NC(CCSC)C(=O)O	-0.299667	-0.445448	-0.461076	0.0603004	0.0490344	0.0407423	IMPC_CBC_015_001___1 point	Clinical Chemistry	Total cholesterol	IMPC_CBC_015_001	20	20	20	20	significant	Different size	IMPC_CBC_015_001	_0054_290
6948	ONLI_0919	HILICNEG	Alpha hydroxy acids and derivatives	2-Hydroxyisobutyric acid	BWLBGMIXKSTLSX-UHFFFAOYSA-N	11671	CC(C)(C(=O)O)O	-0.299742	-0.450715	-0.673102	0.0637582	0.0461069	0.00158576	IMPC_CBC_015_001___1 point	Clinical Chemistry	Total cholesterol	IMPC_CBC_015_001	20	19	20	20	significant	Different size	IMPC_CBC_015_001	_0054_301
16821	ONLI_0218	CSHPOS	Phosphocholines	SMd40:2 A	FOULCGVQZYQEQM-DNXGLLHMSA-O	52931202	CCCCCCCCCCC/C=C/[C@H]([C@H](COP(=O)(O)OCC[N+](C)(C)C)NC(=O)CCCCCCCCCCCCC/C=C\CCCCCCCC)O	0.857451	0.47218	0.639098	1.61026e-12	0.0370929	0.0030283	IMPC_CBC_016_001___1 point	Clinical Chemistry	HDL-cholesterol	IMPC_CBC_016_001	20	20	20	20	significant	Different size	IMPC_CBC_016_001	_0055_40
22130	ONLI_0275	CSHPOS	Phosphatidylcholines	PC16:0/16:0	KILNVBDSWZSGLL-KXQOOQHDSA-N	452110	CCCCCCCCCCCCCCCC(=O)OC[C@H](COP(=O)([O-])OCC[N+](C)(C)C)OC(=O)CCCCCCCCCCCCCCC	0.625921	0.500752	0.517293	1.56438e-05	0.0260515	0.0209784	IMPC_CBC_016_001___1 point	Clinical Chemistry	HDL-cholesterol	IMPC_CBC_016_001	20	20	20	20	significant	Different size	IMPC_CBC_016_001	_0055_67
22321	ONLI_0277	CSHPOS	Phosphatidylcholines	PC38:3	KNNHXKQRTYEWCA-HYYWERRFSA-N	53478919	CCCCCC/C=C\CCCCCCCCCC(=O)O[C@H](COC(=O)CCCCCCCCC/C=C\C/C=C\CCCCC)COP(=O)([O-])OCC[N+](C)(C)C	0.75285	0.547368	0.557895	2.09867e-08	0.0138052	0.0118283	IMPC_CBC_016_001___1 point	Clinical Chemistry	HDL-cholesterol	IMPC_CBC_016_001	20	20	20	20	significant	Different size	IMPC_CBC_016_001	_0055_69
23019	ONLI_0285	CSHPOS	1-acyl-sn-glycero-3-phosphocholines	LPC 16:1	LFUDDCMNKWEORN-ZXEGGCGDSA-N	24779461	CCCCCC/C=C\CCCCCCCC(=O)OC[C@H](COP(=O)([O-])OCC[N+](C)(C)C)O	0.757915	0.473684	0.538346	1.48658e-08	0.0364322	0.0157066	IMPC_CBC_016_001___1 point	Clinical Chemistry	HDL-cholesterol	IMPC_CBC_016_001	20	20	20	20	significant	Different size	IMPC_CBC_016_001	_0055_73
24514	ONLI_0302	CSHPOS	Sphingomyelins	SMd38:2	MDRFMTLYKHBJTF-NQYLGBTJSA-N	52931179	CCCCCCCCCCCCC/C=C/[C@H]([C@H](COP(=O)([O-])OCC[N+](C)(C)C)NC(=O)CCCCCCCCC/C=C\CCCCCCCC)O	0.847038	0.557895	0.723308	5.58784e-12	0.0118283	0.000461386	IMPC_CBC_016_001___1 point	Clinical Chemistry	HDL-cholesterol	IMPC_CBC_016_001	20	20	20	20	significant	Different size	IMPC_CBC_016_001	_0055_82
27121	ONLI_0330	CSHPOS	Phosphatidylcholines	PC37:3	WZCLAXMADUBPSG-RIXBAXMTSA-N	52922657	CCCCCCCCCCCCCCCCCC(=O)OC[C@H](COP(=O)([O-])OCC[N+](C)(C)C)OC(=O)CCCCCCC/C=C\C/C=C\C/C=C\CC	0.817674	0.476692	0.526316	1.19754e-10	0.0351387	0.0185674	IMPC_CBC_016_001___1 point	Clinical Chemistry	HDL-cholesterol	IMPC_CBC_016_001	20	20	20	20	significant	Different size	IMPC_CBC_016_001	_0055_95
33519	ONLI_0397	CSHPOS	Monoalkylglycerophosphocholines	Lyso-PAF C-16	VLBPIWYTPAXCFJ-XMMPIXPASA-N	162126	CCCCCCCCCCCCCCCCOC[C@H](COP(=O)([O-])OCC[N+](C)(C)C)O	0.842816	0.487218	0.449624	9.01646e-12	0.0308957	0.0481889	IMPC_CBC_016_001___1 point	Clinical Chemistry	HDL-cholesterol	IMPC_CBC_016_001	20	20	20	20	significant	Different size	IMPC_CBC_016_001	_0055_122
33710	ONLI_0399	CSHPOS	Cholesteryl esters	CE (22:6)	VOEVEGPMRIYYKC-IWVSHIRDSA-N	53477890	CC/C=C\C/C=C\C/C=C\C/C=C\C/C=C\C/C=C\CCC(=O)O[C@H]1CC[C@@]2(C3CC[C@]4(C(C3CC=C2C1)CCC4[C@H](C)CCCC(C)C)C)C	0.559032	0.535338	0.467669	0.000177164	0.0163857	0.0391321	IMPC_CBC_016_001___1 point	Clinical Chemistry	HDL-cholesterol	IMPC_CBC_016_001	20	20	20	20	significant	Different size	IMPC_CBC_016_001	_0055_123
36426	ONLI_0426	CSHPOS	1,2-diacylglycerols	DAG 38:6; DAG 18:2-20:4;	XQKXAZZSUMABAU-HKOSRXLCSA-N	53478108	CCCCC/C=C\C/C=C\CCCCCCCC(=O)OC[C@H](CO)OC(=O)CCCCCC/C=C\C/C=C\C/C=C\C/C=C\CC	0.32722	-0.452632	-0.476692	0.0393013	0.0465754	0.0351387	IMPC_CBC_016_001___1 point	Clinical Chemistry	HDL-cholesterol	IMPC_CBC_016_001	20	20	20	20	significant	Different size	IMPC_CBC_016_001	_0055_132
36518	ONLI_0427	CSHPOS	1-acyl-sn-glycero-3-phosphocholines	LPC 20:3 b	XUDGAAFUMTTZCO-QNEBEIHSSA-N	138300357	CC/C=C\C/C=C\C/C=C\CCCCCCCCCC(=O)OCC(COP(=O)([O-])OCC[N+](C)(C)C)O	0.631831	0.559398	0.461654	1.22809e-05	0.0115658	0.0419875	IMPC_CBC_016_001___1 point	Clinical Chemistry	HDL-cholesterol	IMPC_CBC_016_001	20	20	20	20	significant	Different size	IMPC_CBC_016_001	_0055_133
36621	ONLI_0428	CSHPOS	1-acyl,2-(1Z-alkenyl)-glycerophosphocholines	PCo-40:7 A	XUVCLJCZWPTAIO-OAKHYACESA-N	53479405	CCCCCCCC/C=C\CCCCCC/C=C\OC(COC(=O)CCCCC/C=C\C/C=C\C/C=C\C/C=C\C/C=C\CC)COP(=O)([O-])OCC[N+](C)(C)C	0.867677	0.652632	0.508271	4.29692e-13	0.00232893	0.0236359	IMPC_CBC_016_001___1 point	Clinical Chemistry	HDL-cholesterol	IMPC_CBC_016_001	20	20	20	20	significant	Different size	IMPC_CBC_016_001	_0055_134
36915	ONLI_0432	CSHPOS	Cholesteryl esters	CE (20:5)	XZFUGMCJZFRBKF-JIKDAPOUSA-N	53477889	CC/C=C\C/C=C\C/C=C\C/C=C\C/C=C\CCCC(=O)O[C@H]1CC[C@@]2(C3CC[C@]4(C(C3CC=C2C1)CCC4[C@H](C)CCCC(C)C)C)C	0.548337	0.449624	0.499248	0.000249231	0.0481889	0.0265576	IMPC_CBC_016_001___1 point	Clinical Chemistry	HDL-cholesterol	IMPC_CBC_016_001	20	20	20	20	significant	Different size	IMPC_CBC_016_001	_0055_137
37018	ONLI_0433	CSHPOS	1-acyl-sn-glycero-3-phosphocholines	LPC 18:1	YAMUFBLWGFFICM-PTGWMXDISA-N	16081932	CCCCCCCC/C=C\CCCCCCCC(=O)OC[C@H](COP(=O)([O-])OCC[N+](C)(C)C)O	0.63943	0.545865	0.509774	8.92968e-06	0.0141083	0.0231751	IMPC_CBC_016_001___1 point	Clinical Chemistry	HDL-cholesterol	IMPC_CBC_016_001	20	20	20	20	significant	Different size	IMPC_CBC_016_001	_0055_138
37723	ONLI_0440	CSHPOS	Phosphosphingolipids	SMd34:2	OAHFTKWSJGVMTG-MBIABJCFSA-N	52931145	CCCCCCCCCCCCC/C=C/[C@H]([C@H](COP(=O)([O-])OCC[N+](C)(C)C)NC(=O)CCCCCCC/C=C\CCCCCC)O	0.835593	0.500752	0.533835	1.98094e-11	0.0260515	0.0167341	IMPC_CBC_016_001___1 point	Clinical Chemistry	HDL-cholesterol	IMPC_CBC_016_001	20	20	20	20	significant	Different size	IMPC_CBC_016_001	_0055_142
37923	ONLI_0442	CSHPOS	1-(1Z-alkenyl),2-acyl-glycerophosphocholines	PCo-38:5 A	YPAPIRJFGNBODV-AMFPDOHCSA-N	53480715	CCCCCCCCCCCCCCCC/C=C\OCC(COP(=O)([O-])OCC[N+](C)(C)C)OC(=O)CCCCCC/C=C\C/C=C\C/C=C\C/C=C\CC	0.842722	0.630075	0.461654	9.11138e-12	0.00358436	0.0419875	IMPC_CBC_016_001___1 point	Clinical Chemistry	HDL-cholesterol	IMPC_CBC_016_001	20	20	20	20	significant	Different size	IMPC_CBC_016_001	_0055_143
43116	ONLI_0524	CSHNEG	1-acyl-sn-glycero-3-phosphocholines	LPC 20:3 a	BBNHCUBQEQJHIG-FZZJNMCHSA-N	52924055	CCCCC/C=C\C/C=C\C/C=C\CCCCCCC(=O)OC[C@H](COP(=O)([O-])OCC[N+](C)(C)C)O	0.641869	0.502256	0.484211	8.04664e-06	0.0255532	0.032064	IMPC_CBC_016_001___1 point	Clinical Chemistry	HDL-cholesterol	IMPC_CBC_016_001	20	20	20	20	significant	Different size	IMPC_CBC_016_001	_0055_163
45214	ONLI_0555	CSHNEG	Sphingomyelins	SM d32:1; SM d16:1/16:0;	RPTUKVYGSPDHGQ-PSALXKTOSA-N	52931133	CCCCCCCCCCCCCCCC(=O)N[C@@H](COP(=O)([O-])OCC[N+](C)(C)C)[C@@H](/C=C/CCCCCCCCCCC)O	-0.295511	0.512782	0.586466	0.0641267	0.0222752	0.00759661	IMPC_CBC_016_001___1 point	Clinical Chemistry	HDL-cholesterol	IMPC_CBC_016_001	20	20	20	20	significant	Different size	IMPC_CBC_016_001	_0055_174
53519	ONLI_0657	CSHNEG	Phosphatidylcholines	PC 38:3	QXDDDGCNWRUEFM-UMKMFDOBSA-N	24778855	CCCCCCCCCCCCCCCCCC(=O)OC[C@H](COP(=O)([O-])OCC[N+](C)(C)C)OC(=O)CCC/C=C\C/C=C\C/C=C\CCCCCCCC	0.685304	0.508271	0.53985	1.06805e-06	0.0236359	0.0153757	IMPC_CBC_016_001___1 point	Clinical Chemistry	HDL-cholesterol	IMPC_CBC_016_001	20	20	20	20	significant	Different size	IMPC_CBC_016_001	_0055_212
53620	ONLI_0658	CSHNEG	Phosphatidylcholines	PC 38:3; PC 18:0-20:3;	VGSUMLIRUGDCTF-NSMRCOLJSA-N	24778857	CCCCCCCCCCCCCCCCCC(=O)OC[C@H](COP(=O)([O-])OCC[N+](C)(C)C)OC(=O)CCCCCC/C=C\C/C=C\C/C=C\CCCCC	0.677049	0.535338	0.53985	1.60883e-06	0.0163857	0.0153757	IMPC_CBC_016_001___1 point	Clinical Chemistry	HDL-cholesterol	IMPC_CBC_016_001	20	20	20	20	significant	Different size	IMPC_CBC_016_001	_0055_213
54522	ONLI_0669	CSHNEG	Phosphatidylinositols	PI 38:4; PI 18:0-20:4;	KRTOMQDUKGRFDJ-LWFBQQSYSA-N	42607491	CCCCCCCCCCCCCCCCCC(=O)OC[C@H](COP(=O)(O)OC1C([C@@H](C(C(C1O)O)O)O)O)OC(=O)CCC/C=C\C/C=C\C/C=C\C/C=C\CCCCC	0.607439	0.491729	0.590977	3.23217e-05	0.0292073	0.00706009	IMPC_CBC_016_001___1 point	Clinical Chemistry	HDL-cholesterol	IMPC_CBC_016_001	20	20	20	20	significant	Different size	IMPC_CBC_016_001	_0055_219
7026	ONLI_0934	HILICNEG	Catechols	4-Methylcatechol	ZBCATMYQYDCTIZ-UHFFFAOYSA-N	9958	CC1=CC(=C(C=C1)O)O	-0.307809	-0.524812	-0.589474	0.0566116	0.0189528	0.00910547	IMPC_CBC_016_001___1 point	Clinical Chemistry	HDL-cholesterol	IMPC_CBC_016_001	20	19	20	20	significant	Different size	IMPC_CBC_016_001	_0055_275
13117	ONLI_0179	CSHPOS	Phosphatidylcholines	PC40:7 A	BPUROMFCPFGBOT-ZEGPSQTJSA-N	24778982	CCCCC/C=C\C/C=C\CCCCCCCC(=O)OC[C@H](COP(=O)([O-])OCC[N+](C)(C)C)OC(=O)CC/C=C\C/C=C\C/C=C\C/C=C\C/C=C\CCCCC	0.718791	0.510158	0.885295	1.75279e-07	0.0215539	2.13804e-07	IMPC_CBC_999_999___1 point	Clinical Chemistry	Non-HDL-cholesterol	IMPC_CBC_999_999	20	20	20	20	significant	Different size	IMPC_CBC_999_999	_0056_30
15814	ONLI_0207	CSHPOS	Phosphatidylcholines	PC(18:0/22:6(4Z,7Z,10Z,13Z,16Z,19Z)	FAUYAENFVCNTAL-PFFNLMTBSA-N	24778876	CCCCCCCCCCCCCCCCCC(=O)OC[C@H](COP(=O)([O-])OCC[N+](C)(C)C)OC(=O)CC/C=C\C/C=C\C/C=C\C/C=C\C/C=C\C/C=C\CC	0.548433	0.553048	0.789018	0.000248486	0.0114307	3.55264e-05	IMPC_CBC_999_999___1 point	Clinical Chemistry	Non-HDL-cholesterol	IMPC_CBC_999_999	20	20	20	20	significant	Different size	IMPC_CBC_999_999	_0056_37
1996	ONLI_0252	CSHPOS	Cholesteryl esters	CE (20:4)	IMXSFYNMSOULQS-BEDFLICRSA-N	6479222	CCCCC/C=C\C/C=C\C/C=C\C/C=C\CCCC(=O)O[C@H]1CC[C@@]2([C@H]3CC[C@]4([C@H]([C@@H]3CC=C2C1)CC[C@@H]4[C@H](C)CCCC(C)C)C)C	0.44847	0.511663	0.494171	0.00370397	0.0211071	0.0267793	IMPC_CBC_999_999___1 point	Clinical Chemistry	Non-HDL-cholesterol	IMPC_CBC_999_999	20	20	20	20	significant	Different size	IMPC_CBC_999_999	_0056_54
22322	ONLI_0277	CSHPOS	Phosphatidylcholines	PC38:3	KNNHXKQRTYEWCA-HYYWERRFSA-N	53478919	CCCCCC/C=C\CCCCCCCCCC(=O)O[C@H](COC(=O)CCCCCCCCC/C=C\C/C=C\CCCCC)COP(=O)([O-])OCC[N+](C)(C)C	0.694387	0.471783	0.819105	6.70026e-07	0.0357189	1.00086e-05	IMPC_CBC_999_999___1 point	Clinical Chemistry	Non-HDL-cholesterol	IMPC_CBC_999_999	20	20	20	20	significant	Different size	IMPC_CBC_999_999	_0056_65
22812	ONLI_0283	CSHPOS	Phosphosphingolipids	SMd32:1	KYICBZWZQPCUMO-PSALXKTOSA-N	11433862	CCCCCCCCCCCCC/C=C/[C@H]([C@H](COP(=O)([O-])OCC[N+](C)(C)C)NC(=O)CCCCCCCCCCCCC)O	0.358269	0.527464	0.5912	0.0232087	0.0168463	0.00604633	IMPC_CBC_999_999___1 point	Clinical Chemistry	Non-HDL-cholesterol	IMPC_CBC_999_999	20	20	20	20	significant	Different size	IMPC_CBC_999_999	_0056_66
26417	ONLI_0323	CSHPOS	Phosphatidylcholines	PC 36:0; PC 18:0-18:0;	NRJAVPSFFCBXDT-HUESYALOSA-N	94190	CCCCCCCCCCCCCCCCCC(=O)OC[C@H](COP(=O)([O-])OCC[N+](C)(C)C)OC(=O)CCCCCCCCCCCCCCCCC	0.151117	0.668924	0.624295	0.351956	0.00125995	0.003259	IMPC_CBC_999_999___1 point	Clinical Chemistry	Non-HDL-cholesterol	IMPC_CBC_999_999	20	20	20	20	significant	Different size	IMPC_CBC_999_999	_0056_82
28325	ONLI_0342	CSHPOS	Phosphatidylcholines	PC34:0	PZNPLUBHRSSFHT-RRHRGVEJSA-N	24778686	CCCCCCCCCCCCCCCCCC(=O)O[C@H](COC(=O)CCCCCCCCCCCCCCC)COP(=O)([O-])OCC[N+](C)(C)C	0.357706	0.448458	0.582926	0.0234418	0.0473446	0.00698663	IMPC_CBC_999_999___1 point	Clinical Chemistry	Non-HDL-cholesterol	IMPC_CBC_999_999	20	20	20	20	significant	Different size	IMPC_CBC_999_999	_0056_89
31716	ONLI_0379	CSHPOS	Phosphatidylcholines	PC38:5 A	SUACBSWYGWBPFC-GPUJSUHJSA-N	52923235	CCCCC/C=C\C/C=C\CCCCCCCC(=O)O[C@H](COC(=O)CCCCCC/C=C\C/C=C\C/C=C\CCCCC)COP(=O)([O-])OCC[N+](C)(C)C	0.672424	0.472536	0.767958	2.01254e-06	0.035385	7.69506e-05	IMPC_CBC_999_999___1 point	Clinical Chemistry	Non-HDL-cholesterol	IMPC_CBC_999_999	20	20	20	20	significant	Different size	IMPC_CBC_999_999	_0056_99
33711	ONLI_0399	CSHPOS	Cholesteryl esters	CE (22:6)	VOEVEGPMRIYYKC-IWVSHIRDSA-N	53477890	CC/C=C\C/C=C\C/C=C\C/C=C\C/C=C\C/C=C\CCC(=O)O[C@H]1CC[C@@]2(C3CC[C@]4(C(C3CC=C2C1)CCC4[C@H](C)CCCC(C)C)C)C	0.64511	0.517683	0.688981	6.99697e-06	0.0193932	0.000780176	IMPC_CBC_999_999___1 point	Clinical Chemistry	Non-HDL-cholesterol	IMPC_CBC_999_999	20	20	20	20	significant	Different size	IMPC_CBC_999_999	_0056_107
53013	ONLI_0651	CSHNEG	Phosphatidylcholines	PC 38:5; PC 18:1-20:4;	SWOKEJBWARJLGN-ORKYUJCWSA-N	53478767	CCCCCCCC/C=C\CCCCCCCC(=O)OC[C@H](COP(=O)([O-])OCC[N+](C)(C)C)OC(=O)CCCCCC/C=C\C/C=C\C/C=C\C/C=C\CC	0.719918	0.525207	0.852952	1.64209e-07	0.0174088	1.76781e-06	IMPC_CBC_999_999___1 point	Clinical Chemistry	Non-HDL-cholesterol	IMPC_CBC_999_999	20	20	20	20	significant	Different size	IMPC_CBC_999_999	_0056_189
5328	ONLI_0653	CSHNEG	Phosphatidylcholines	PC 38:4	PSVRFUPOQYJOOZ-QNPWAGBNSA-N	16219824	CCCCCCCCCCCCCCCCCC(=O)OC[C@H](COP(=O)([O-])OCC[N+](C)(C)C)OC(=O)CCC/C=C\C/C=C\C/C=C\C/C=C\CCCCC	0.325887	0.521445	0.543061	0.0401569	0.0183796	0.0133455	IMPC_CBC_999_999___1 point	Clinical Chemistry	Non-HDL-cholesterol	IMPC_CBC_999_999	20	20	20	20	significant	Different size	IMPC_CBC_999_999	_0056_190
5337	ONLI_0654	CSHNEG	Phosphatidylcholines	PC 38:4; PC 16:0-22:4;	IRWRFKUTKSUFST-MDYGELLQSA-N	24778732	CCCCCCCCCCCCCCCC(=O)OC[C@H](COP(=O)([O-])OCC[N+](C)(C)C)OC(=O)CCCCC/C=C\C/C=C\C/C=C\C/C=C\CCCCC	0.325887	0.521445	0.543061	0.0401569	0.0183796	0.0133455	IMPC_CBC_999_999___1 point	Clinical Chemistry	Non-HDL-cholesterol	IMPC_CBC_999_999	20	20	20	20	significant	Different size	IMPC_CBC_999_999	_0056_191
54818	ONLI_0672	CSHNEG	Phosphatidylcholines	PC 40:7; PC 18:1-22:6;	FPEVDFOXMCHLKL-KFDYCXSYSA-N	24778955	CCCCCCCC/C=C\CCCCCCCC(=O)OC[C@H](COP(=O)([O-])OCC[N+](C)(C)C)OC(=O)CC/C=C\C/C=C\C/C=C\C/C=C\C/C=C\C/C=C\CC	0.691477	0.477803	0.761941	7.79389e-07	0.0331149	9.45936e-05	IMPC_CBC_999_999___1 point	Clinical Chemistry	Non-HDL-cholesterol	IMPC_CBC_999_999	20	20	20	20	significant	Different size	IMPC_CBC_999_999	_0056_200
54913	ONLI_0673	CSHNEG	Phosphatidylcholines	PC 40:6	FYVNIFOYDIIODX-KNKJIUSSSA-N	24778900	CCCCCC/C=C\CCCCCCCCCC(=O)OC[C@H](COP(=O)([O-])OCC[N+](C)(C)C)OC(=O)CCCCC/C=C\C/C=C\C/C=C\C/C=C\C/C=C\CC	0.496997	0.48909	0.774727	0.00110491	0.0286339	6.05582e-05	IMPC_CBC_999_999___1 point	Clinical Chemistry	Non-HDL-cholesterol	IMPC_CBC_999_999	20	20	20	20	significant	Different size	IMPC_CBC_999_999	_0056_201
55721	ONLI_0683	CSHNEG	Phosphatidylcholines	PC 42:7; PC 20:1-22:6;	FYVDGOCCFDKYOR-OEQCKVCZSA-N	52923147	CCCCCCCC/C=C\CCCCCCCCCC(=O)OC[C@H](COP(=O)([O-])OCC[N+](C)(C)C)OC(=O)CC/C=C\C/C=C\C/C=C\C/C=C\C/C=C\C/C=C\CC	0.524592	0.453725	0.693494	0.000511043	0.0444955	0.000696851	IMPC_CBC_999_999___1 point	Clinical Chemistry	Non-HDL-cholesterol	IMPC_CBC_999_999	20	20	20	20	significant	Different size	IMPC_CBC_999_999	_0056_208
4450	ONLI_0053	gctof	Sugar alcohols	lyxitol	HEBKCHPVOIAQTA-IMJSIDKUSA-N	439255	C([C@@H](C([C@H](CO)O)O)O)O	0.446738	0.529323	0.561865	0.00385528	0.0178155	0.00993078	IMPC_CBC_017_001___1 point	Clinical Chemistry	Triglycerides	IMPC_CBC_017_001	20	20	20	20	significant	Different size	IMPC_CBC_017_001	_0057_6
11115	ONLI_0157	CSHPOS	Triacylglycerols	TAG 58:7; TAG 18:1-18:1-22:5;	AANCKINPVVQDGX-OSUITXOZSA-N	131760076	CCCCCC/C=C\CCCCCCCCCC(=O)OC[C@@H](COC(=O)CCCCC/C=C\C/C=C\C/C=C\C/C=C\C/C=C\CC)OC(=O)CCCCCCCCC/C=C\CCCCCC	0.929687	0.884211	0.868748	4.54023e-18	0	6.75278e-07	IMPC_CBC_017_001___1 point	Clinical Chemistry	Triglycerides	IMPC_CBC_017_001	20	20	20	20	significant	Different size	IMPC_CBC_017_001	_0057_20
11310	ONLI_0159	CSHPOS	Triacylglycerols	TAG 54:7; TAG 18:2-18:2-18:3;	NGPHUAVENUDDAO-GZNXBNPNSA-N	100977823	CCCCC/C=C\C/C=C\CCCCCCCC(=O)OC[C@@H](COC(=O)CCCCCCC/C=C\C/C=C\C/C=C\CC)OC(=O)CCCCCCC/C=C\C/C=C\CCCCC	0.794221	0.842105	0.73035	9.57987e-10	0	0.000255709	IMPC_CBC_017_001___1 point	Clinical Chemistry	Triglycerides	IMPC_CBC_017_001	20	20	20	20	significant	Different size	IMPC_CBC_017_001	_0057_22
11513	ONLI_0161	CSHPOS	Lineolic acids and derivatives	DAG 36:2; DAG 18:0-18:2;	AJMZUFBKADIAKC-SKTOPKGQSA-N	6441562	CCCCCCCCCCCCCCCCCC(=O)OC[C@H](CO)OC(=O)CCCCCCC/C=C\C/C=C\CCCCC	0.880904	0.796992	0.815344	6.54891e-14	3.33058e-05	1.18698e-05	IMPC_CBC_017_001___1 point	Clinical Chemistry	Triglycerides	IMPC_CBC_017_001	20	20	20	20	significant	Different size	IMPC_CBC_017_001	_0057_23
1166	ONLI_0162	CSHPOS	Triacylglycerols	TAG 55:2; TAG 17:0-18:1-20:1;	AKDAPWJIGQLALK-XSUIJCOHSA-N	134718461	CCCCCCCCCCCCCCCCC(=O)OC[C@H](COC(=O)CCCCCCCCC/C=C/CCCCCCCC)OC(=O)CCCCCCCCC/C=C/CCCCCC	0.826762	0.721053	0.75141	8.88178e-11	0.000718586	0.000133889	IMPC_CBC_017_001___1 point	Clinical Chemistry	Triglycerides	IMPC_CBC_017_001	19	20	20	20	significant	Different size	IMPC_CBC_017_001	_0057_24
12211	ONLI_0169	CSHPOS	Triacylglycerols	TAG 53:5; TAG 17:1-18:2-18:2;	0	NA	0	0.885595	0.896241	0.797292	3.18413e-14	7.48063e-07	2.56052e-05	IMPC_CBC_017_001___1 point	Clinical Chemistry	Triglycerides	IMPC_CBC_017_001	20	20	20	20	significant	Different size	IMPC_CBC_017_001	_0057_29
12312	ONLI_0170	CSHPOS	Phosphatidylethanolamines	PC35:3	AYXGHIQPMDYMJC-AHMBLZLYSA-N	52924614	CCCCCCCCCCCCCCCCCC(=O)O[C@H](COC(=O)CCCCCC/C=C\C/C=C\C/C=C\CCCCC)COP(=O)(O)OCCN	0.655096	0.544361	0.543814	4.50128e-06	0.0144169	0.0131928	IMPC_CBC_017_001___1 point	Clinical Chemistry	Triglycerides	IMPC_CBC_017_001	20	20	20	20	significant	Different size	IMPC_CBC_017_001	_0057_30
1248	ONLI_0171	CSHPOS	Alkyldiacylglycerols	TAG 49:0; TAG 15:0-16:0-18:0;	AYHAGPSMXXZJSI-VCZQVZGSSA-N	131754177	CCCCCCCCCCCCCCCCCCOC[C@H](COC(=O)CCCCCCCCCCCCCC)OC(=O)CCCCCCCCCCCCCCC	0.675079	0.651128	0.587439	1.77067e-06	0.00239933	0.00645994	IMPC_CBC_017_001___1 point	Clinical Chemistry	Triglycerides	IMPC_CBC_017_001	20	20	20	20	significant	Different size	IMPC_CBC_017_001	_0057_31
12610	ONLI_0173	CSHPOS	Triacylglycerols	TAG 53:1; TAG 17:0-18:0-18:1;	BHJLNGDWUXQOBH-QOCHGBHMSA-N	138126516	CCCCCCCCCCCCCCCCCC(=O)OC(COC(=O)CCCCCCCCCCCCCCCC)COC(=O)CCCCCCCCC/C=C\CCCCCC	0.816011	0.802941	0.762693	1.32406e-09	0.00027427	9.22139e-05	IMPC_CBC_017_001___1 point	Clinical Chemistry	Triglycerides	IMPC_CBC_017_001	16	20	20	20	significant	Different size	IMPC_CBC_017_001	_0057_33
12912	ONLI_0177	CSHPOS	Lineolic acids and derivatives	DAG 36:3; DAG 18:1-18:2;	BLZVZPYMHLXLHG-JOBMVARSSA-N	9543722	CCCCCCCC/C=C\CCCCCCCC(=O)OC[C@H](CO)OC(=O)CCCCCCC/C=C\C/C=C\CCCCC	0.881655	0.831579	0.79654	5.84724e-14	2.99428e-07	2.63949e-05	IMPC_CBC_017_001___1 point	Clinical Chemistry	Triglycerides	IMPC_CBC_017_001	20	20	20	20	significant	Different size	IMPC_CBC_017_001	_0057_36
13015	ONLI_0178	CSHPOS	Phosphatidylcholines	PC38:7	BNNUJTATKJXKJP-XCDHYEIISA-N	53479075	CCCCC/C=C\C/C=C\C/C=C\CCCCC(=O)O[C@H](COC(=O)CCCCCC/C=C\C/C=C\C/C=C\C/C=C\CC)COP(=O)([O-])OCC[N+](C)(C)C	0.77377	0.699248	0.660399	4.77614e-09	0.000846725	0.00152856	IMPC_CBC_017_001___1 point	Clinical Chemistry	Triglycerides	IMPC_CBC_017_001	20	20	20	20	significant	Different size	IMPC_CBC_017_001	_0057_37
13320	ONLI_0181	CSHPOS	Phosphatidylcholines	PC36:3 A	BXRLDROZWDUSGM-ZRYFCQOPSA-N	24778937	CCCCCCCC/C=C\CCCCCCCC(=O)OC[C@H](COP(=O)([O-])OCC[N+](C)(C)C)OC(=O)CCCC/C=C\C/C=C\CCCCCCCC	0.697406	0.536842	0.610756	5.71682e-07	0.0160432	0.00423044	IMPC_CBC_017_001___1 point	Clinical Chemistry	Triglycerides	IMPC_CBC_017_001	20	20	20	20	significant	Different size	IMPC_CBC_017_001	_0057_38
13516	ONLI_0183	CSHPOS	Triacylglycerols	TAG 52:7; TAG 16:1-18:2-18:4;	CMQKNURFVKDTED-HQIPLBRRSA-N	131759572	CCCCCC/C=C\CCCCCCCC(=O)OC[C@@H](COC(=O)CCCC/C=C\C/C=C\C/C=C\C/C=C\CC)OC(=O)CCCCCCC/C=C\C/C=C\CCCCC	0.793564	0.733835	0.770214	1.01149e-09	0.000345147	7.11075e-05	IMPC_CBC_017_001___1 point	Clinical Chemistry	Triglycerides	IMPC_CBC_017_001	20	20	20	20	significant	Different size	IMPC_CBC_017_001	_0057_40
1419	ONLI_0189	CSHPOS	Triacylglycerols	TAG 54:3; TAG 16:0-18:0-20:3;	CICXNKCKBFXJSH-LZWIKYMTSA-N	131755017	CCCCCCCCCCCCCCCCCC(=O)O[C@@H](COC(=O)CCCCCCCCCCCCCCC)COC(=O)CCC/C=C\C/C=C\C/C=C\CCCCCCCC	0.83184	0.819549	0.716059	2.93783e-11	6.73162e-06	0.000384048	IMPC_CBC_017_001___1 point	Clinical Chemistry	Triglycerides	IMPC_CBC_017_001	20	20	20	20	significant	Different size	IMPC_CBC_017_001	_0057_43
1424	ONLI_0190	CSHPOS	Triacylglycerols	TAG 56:4; TAG 18:0-18:0-20:4;	CIRJQIDEADRSMG-ZYKWSEAGSA-N	131750364	CCCCCCCCCCCCCCCCCC(=O)OC[C@@H](COC(=O)CCC/C=C\C/C=C\C/C=C\C/C=C\CCCCC)OC(=O)CCCCCCCCCCCCCCCCC	0.786716	0.745865	0.525009	1.76269e-09	0.000242084	0.0174587	IMPC_CBC_017_001___1 point	Clinical Chemistry	Triglycerides	IMPC_CBC_017_001	20	20	20	20	significant	Different size	IMPC_CBC_017_001	_0057_44
1435	ONLI_0191	CSHPOS	Triacylglycerols	TAG 54:1; TAG 18:0-18:0-18:1;	CXVKBFLPGNGMQW-NAWMRHBJSA-N	131750547	CCCCCCCCCCCCCCCCCC(=O)OC[C@@H](COC(=O)CCCCCCCCC/C=C\CCCCCC)OC(=O)CCCCCCCCCCCCCCCCC	0.854637	0.777444	0.881534	2.27533e-12	8.08652e-05	2.81795e-07	IMPC_CBC_017_001___1 point	Clinical Chemistry	Triglycerides	IMPC_CBC_017_001	20	20	20	20	significant	Different size	IMPC_CBC_017_001	_0057_45
1446	ONLI_0192	CSHPOS	Triacylglycerols	TAG 51:3; TAG 15:0-18:1-18:2;	CYSYJKJDVJLYTD-KDHVXLOFSA-N	138140505	CCCCCCCCCCCCCCC(=O)OCC(COC(=O)CCCCCCCC/C=C\C=C/CCCCC)OC(=O)CCCCCCCCC/C=C\CCCCCC	0.936348	0.942857	0.871004	7.26728e-19	5.785e-06	5.8268e-07	IMPC_CBC_017_001___1 point	Clinical Chemistry	Triglycerides	IMPC_CBC_017_001	20	20	20	20	significant	Different size	IMPC_CBC_017_001	_0057_46
1497	ONLI_0197	CSHPOS	Triacylglycerols	TAG 48:3; TAG 12:0-18:1-18:2;	DILVDBIGCVMQJQ-HQZFYGAOSA-N	138143748	CCCCCCCCCCCC(=O)OCC(COC(=O)CCCCCCCC/C=C\C=C/CCCCC)OC(=O)CCCCCCCCC/C=C\CCCCCC	0.887096	0.863158	0.84167	2.51124e-14	0	3.2927e-06	IMPC_CBC_017_001___1 point	Clinical Chemistry	Triglycerides	IMPC_CBC_017_001	20	20	20	20	significant	Different size	IMPC_CBC_017_001	_0057_50
1504	ONLI_0198	CSHPOS	Triacylglycerols	TAG 56:7; TAG 16:0-18:1-22:6;	DNTWVXNMAFTXDU-RVFBAGKZSA-N	131755186	CCCCCCCCCCCCCCCC(=O)OC[C@@H](COC(=O)CC/C=C\C/C=C\C/C=C\C/C=C\C/C=C\C/C=C\CC)OC(=O)CCCCCCCCC/C=C\CCCCCC	0.849102	0.803008	0.83114	4.39924e-12	2.38516e-05	5.64379e-06	IMPC_CBC_017_001___1 point	Clinical Chemistry	Triglycerides	IMPC_CBC_017_001	20	20	20	20	significant	Different size	IMPC_CBC_017_001	_0057_51
15116	ONLI_0199	CSHPOS	Triacylglycerols	TAG 48:3; TAG 14:0-16:0-18:3;	ROOGPSPBLOJPPQ-MMNSDLEGSA-N	131753281	CCCCCCCCCCCCCCCC(=O)O[C@@H](COC(=O)CCCCCCCCCCCCC)COC(=O)CCCC/C=C\C/C=C\C/C=C\CCCCC	0.874431	0.796992	0.844679	1.68831e-13	3.33058e-05	2.80282e-06	IMPC_CBC_017_001___1 point	Clinical Chemistry	Triglycerides	IMPC_CBC_017_001	20	20	20	20	significant	Different size	IMPC_CBC_017_001	_0057_52
15216	ONLI_0200	CSHPOS	Triacylglycerols	TAG 50:3; TAG 16:0-16:1-18:2;	HDFLQJUGWGNORO-NSVHLBAISA-N	131750350	CCCCCCCCCCCCCCCC(=O)OC[C@@H](COC(=O)CCCCCCC/C=C\C/C=C\CCCCC)OC(=O)CCCCCCC/C=C\CCCCCC	0.881467	0.854135	0.857465	6.0157e-14	0	1.35864e-06	IMPC_CBC_017_001___1 point	Clinical Chemistry	Triglycerides	IMPC_CBC_017_001	20	20	20	20	significant	Different size	IMPC_CBC_017_001	_0057_53
15412	ONLI_0202	CSHPOS	Phosphatidylethanolamines	PE 16:0-20:4	DRIVXEVMDWCWLI-CAQMIEAISA-N	9546800	CCCCCCCCCCCCCCCC(=O)OC[C@H](COP(=O)(O)OCCN)OC(=O)CCC/C=C\C/C=C\C/C=C\C/C=C\CCCCC	0.705193	0.53985	0.665664	3.76205e-07	0.0153757	0.00135755	IMPC_CBC_017_001___1 point	Clinical Chemistry	Triglycerides	IMPC_CBC_017_001	20	20	20	20	significant	Different size	IMPC_CBC_017_001	_0057_54
1567	ONLI_0205	CSHPOS	Triacylglycerols	TAG 56:3; TAG 18:1-18:1-20:1;	QXMHHXQBBKDSSL-QGDSHWIZSA-N	131750410	CCCCCCCC/C=C\CCCCCCCCCC(=O)OC[C@H](COC(=O)CCCCCCC/C=C\CCCCCCCC)OC(=O)CCCCCCC/C=C\CCCCCCCC	0.849008	0.857143	0.818353	4.44766e-12	0	1.03591e-05	IMPC_CBC_017_001___1 point	Clinical Chemistry	Triglycerides	IMPC_CBC_017_001	20	20	20	20	significant	Different size	IMPC_CBC_017_001	_0057_56
15711	ONLI_0206	CSHPOS	Triacylglycerols	TAG 52:5; TAG 16:0-18:2-18:3;	PWAOXOJAJJJACV-MSFNIHOKSA-N	131755325	CCCCCCCCCCCCCCCC(=O)OC[C@@H](COC(=O)CCCC/C=C\C/C=C\C/C=C\CCCCC)OC(=O)CCCCCCC/C=C\C/C=C\CCCCC	0.881936	0.873684	0.865739	5.60284e-14	0	8.18633e-07	IMPC_CBC_017_001___1 point	Clinical Chemistry	Triglycerides	IMPC_CBC_017_001	20	20	20	20	significant	Different size	IMPC_CBC_017_001	_0057_57
15912	ONLI_0208	CSHPOS	Triacylglycerols	TAG 46:2; TAG 12:0-16:0-18:2;	0	NA	0	0.918265	0.9	0.905604	1.83332e-16	0	3.99553e-08	IMPC_CBC_017_001___1 point	Clinical Chemistry	Triglycerides	IMPC_CBC_017_001	19	20	20	20	significant	Different size	IMPC_CBC_017_001	_0057_59
1606	ONLI_0209	CSHPOS	Triacylglycerols	TAG 51:1; TAG 16:0-17:0-18:1;	RHDRMOUSDQDVCE-IWRJKWNLSA-N	9544019	CCCCCCCCCCCCCCCCC(=O)O[C@H](COC(=O)CCCCCCCCCCCCCCC)COC(=O)CCCCCCC/C=C\CCCCCCCC	0.862423	0.810526	0.810831	8.58326e-13	1.46396e-05	1.44935e-05	IMPC_CBC_017_001___1 point	Clinical Chemistry	Triglycerides	IMPC_CBC_017_001	20	20	20	20	significant	Different size	IMPC_CBC_017_001	_0057_60
16116	ONLI_0210	CSHPOS	Triacylglycerols	TAG 52:5; TAG 16:0-16:1-20:4;	BURBQZUNMNAKMA-RAKRAUFVSA-N	131750351	CCCCCCCCCCCCCCCC(=O)OC[C@@H](COC(=O)CCC/C=C\C/C=C\C/C=C\C/C=C\CCCCC)OC(=O)CCCCCCC/C=C\CCCCCC	0.860735	0.833083	0.776232	1.06568e-12	0	5.73556e-05	IMPC_CBC_017_001___1 point	Clinical Chemistry	Triglycerides	IMPC_CBC_017_001	20	20	20	20	significant	Different size	IMPC_CBC_017_001	_0057_61
16310	ONLI_0212	CSHPOS	Triacylglycerols	TAG 56:2; TAG 16:0-18:1-22:1;	JBTULCCTZFQLPM-JSPVYFJMSA-N	131755171	CCCCCCCCCCCCCCCC(=O)OC[C@@H](COC(=O)CCCCCCCCCCC/C=C\CCCCCCCC)OC(=O)CCCCCCCCC/C=C\CCCCCC	0.824523	0.738346	0.837909	6.16657e-11	0.000303102	4.00877e-06	IMPC_CBC_017_001___1 point	Clinical Chemistry	Triglycerides	IMPC_CBC_017_001	20	20	20	20	significant	Different size	IMPC_CBC_017_001	_0057_63
16714	ONLI_0217	CSHPOS	Triacylglycerols	TAG 50:4; TAG 14:0-16:0-20:4;	FKJNKIIHHYXTFQ-SUNRTHERSA-N	131753284	CCCCCCCCCCCCCCCC(=O)O[C@@H](COC(=O)CCCCCCCCCCCCC)COC(=O)CCC/C=C\C/C=C\C/C=C\C/C=C\CCCCC	0.866363	0.822556	0.830387	5.12231e-13	4.73313e-06	5.85703e-06	IMPC_CBC_017_001___1 point	Clinical Chemistry	Triglycerides	IMPC_CBC_017_001	20	20	20	20	significant	Different size	IMPC_CBC_017_001	_0057_65
16915	ONLI_0220	CSHPOS	Phosphatidylcholines	PC 36:4; PC 18:2-18:2;	FVXDQWZBHIXIEJ-LNDKUQBDSA-N	5288075	CCCCC/C=C\C/C=C\CCCCCCCC(=O)OC[C@H](COP(=O)([O-])OCC[N+](C)(C)C)OC(=O)CCCCCCC/C=C\C/C=C\CCCCC	0.728646	0.616541	0.537796	9.79822e-08	0.00457438	0.0144546	IMPC_CBC_017_001___1 point	Clinical Chemistry	Triglycerides	IMPC_CBC_017_001	20	20	20	20	significant	Different size	IMPC_CBC_017_001	_0057_66
17018	ONLI_0221	CSHPOS	1,2-diacylglycerols	DAG 34:2; DAG 16:1-18:1;	FWWLDEIJAPIBES-DATDAJMQSA-N	9543694	CCCCCCCC/C=C\CCCCCCCC(=O)O[C@@H](CO)COC(=O)CCCCCCC/C=C\CCCCCC	0.78953	0.651128	0.732606	1.40644e-09	0.00239933	0.000239258	IMPC_CBC_017_001___1 point	Clinical Chemistry	Triglycerides	IMPC_CBC_017_001	20	20	20	20	significant	Different size	IMPC_CBC_017_001	_0057_67
17412	ONLI_0225	CSHPOS	Phosphatidylethanolamines	PE 36:3; PE 18:1-18:2;	GKAFCSRKMWFPSJ-RJXNKANHSA-N	9546753	CCCCCCCC/C=C\CCCCCCCC(=O)OC[C@H](COP(=O)(O)OCCN)OC(=O)CCCCCCC/C=C\C/C=C\CCCCC	0.727708	0.681203	0.632569	1.03671e-07	0.00128076	0.00276243	IMPC_CBC_017_001___1 point	Clinical Chemistry	Triglycerides	IMPC_CBC_017_001	20	20	20	20	significant	Different size	IMPC_CBC_017_001	_0057_70
17512	ONLI_0226	CSHPOS	Triacylglycerols	TAG 50:5; TAG 14:0-18:2-18:3;	BVZCCLFFAYZNFZ-QLFKCXFRSA-N	131753671	CCCCCCCCCCCCCC(=O)OC[C@@H](COC(=O)CCCCCCC/C=C\C/C=C\C/C=C\CC)OC(=O)CCCCCCC/C=C\C/C=C\CCCCC	0.890661	0.852632	0.887552	1.40956e-14	0	1.80327e-07	IMPC_CBC_017_001___1 point	Clinical Chemistry	Triglycerides	IMPC_CBC_017_001	20	20	20	20	significant	Different size	IMPC_CBC_017_001	_0057_71
18012	ONLI_0231	CSHPOS	Phosphatidylethanolamines	PE34:2	HBZNVZIRJWODIB-NHCUFCNUSA-N	9546747	CCCCCCCCCCCCCCCC(=O)OC[C@H](COP(=O)(O)OCCN)OC(=O)CCCCCCC/C=C\C/C=C\CCCCC	0.725269	0.631579	0.689733	1.19928e-07	0.00348625	0.000765731	IMPC_CBC_017_001___1 point	Clinical Chemistry	Triglycerides	IMPC_CBC_017_001	20	20	20	20	significant	Different size	IMPC_CBC_017_001	_0057_75
18120	ONLI_0232	CSHPOS	Triacylglycerols	TAG 52:6; TAG 16:0-16:1-20:5;	CCDSJNBGVOSHIH-OFLVPTCNSA-N	131755156	CCCCCCCCCCCCCCCC(=O)OC[C@@H](COC(=O)CCC/C=C\C/C=C\C/C=C\C/C=C\C/C=C\CC)OC(=O)CCCCCCC/C=C\CCCCCC	0.820489	0.766917	0.844679	9.14754e-11	0.000120519	2.80282e-06	IMPC_CBC_017_001___1 point	Clinical Chemistry	Triglycerides	IMPC_CBC_017_001	20	20	20	20	significant	Different size	IMPC_CBC_017_001	_0057_76
1844	ONLI_0235	CSHPOS	Triacylglycerols	TAG 56:4; TAG 18:1-18:2-20:1;	YONCDTJKIZDSKQ-UVIGLXQBSA-N	131750415	CCCCCCCC/C=C\CCCCCCCCCC(=O)OC[C@H](COC(=O)CCCCCCC/C=C\CCCCCCCC)OC(=O)CCCCCCC/C=C\C/C=C\CCCCC	0.844317	0.82406	0.715307	7.61828e-12	3.83879e-06	0.000392098	IMPC_CBC_017_001___1 point	Clinical Chemistry	Triglycerides	IMPC_CBC_017_001	20	20	20	20	significant	Different size	IMPC_CBC_017_001	_0057_78
19011	ONLI_0241	CSHPOS	Triacylglycerols	TAG 48:2; TAG 14:0-16:0-18:2;	YUIIXXZIUIOJQY-RGFFXGESSA-N	131753280	CCCCCCCCCCCCCCCC(=O)O[C@@H](COC(=O)CCCCCCCCCCCCC)COC(=O)CCCCCCC/C=C\C/C=C\CCCCC	0.903889	0.884211	0.847687	1.3696e-15	0	2.37774e-06	IMPC_CBC_017_001___1 point	Clinical Chemistry	Triglycerides	IMPC_CBC_017_001	20	20	20	20	significant	Different size	IMPC_CBC_017_001	_0057_83
1929	ONLI_0244	CSHPOS	Triacylglycerols	TAG 54:2; TAG 18:0-18:1-18:1;	RYNHWWNZNIGDAQ-WNMJAFDRSA-N	42627601	CCCCCCCCCCCCCCCCCC(=O)OC[C@@H](COC(=O)CCCCCCC/C=C\CCCCCCCC)OC(=O)CCCCCCC/C=C\CCCCCCCC	0.926873	0.92782	0.8349	9.33515e-18	4.64804e-06	4.67574e-06	IMPC_CBC_017_001___1 point	Clinical Chemistry	Triglycerides	IMPC_CBC_017_001	20	20	20	20	significant	Different size	IMPC_CBC_017_001	_0057_85
19314	ONLI_0245	CSHPOS	Triacylglycerols	TAG 50:3; TAG 16:0-16:0-18:3;	WLFXGZDFDKIDIL-MXPUMGEASA-N	131750534	CCCCCCCCCCCCCCCC(=O)OC[C@@H](COC(=O)CCCCCCC/C=C\C/C=C\C/C=C\CC)OC(=O)CCCCCCCCCCCCCCC	0.874713	0.803008	0.908612	1.62198e-13	2.38516e-05	3.01898e-08	IMPC_CBC_017_001___1 point	Clinical Chemistry	Triglycerides	IMPC_CBC_017_001	20	20	20	20	significant	Different size	IMPC_CBC_017_001	_0057_86
1945	ONLI_0246	CSHPOS	Triacylglycerols	TAG 54:4; TAG 16:0-18:0-20:4;	IBSUTTNKAUSOHR-WPQPACDXSA-N	131750342	CCCCCCCCCCCCCCCCCC(=O)O[C@@H](COC(=O)CCCCCCCCCCCCCCC)COC(=O)CCC/C=C\C/C=C\C/C=C\C/C=C\CCCCC	0.736808	0.742857	0.705528	5.9373e-08	0.000265205	0.000510549	IMPC_CBC_017_001___1 point	Clinical Chemistry	Triglycerides	IMPC_CBC_017_001	20	20	20	20	significant	Different size	IMPC_CBC_017_001	_0057_87
19711	ONLI_0250	CSHPOS	Triacylglycerols	TAG 48:4; TAG 12:0-18:1-18:3;	0	NA	0	0.851729	0.863158	0.782249	3.228e-12	0	4.59601e-05	IMPC_CBC_017_001___1 point	Clinical Chemistry	Triglycerides	IMPC_CBC_017_001	20	20	20	20	significant	Different size	IMPC_CBC_017_001	_0057_90
20015	ONLI_0254	CSHPOS	Triacylglycerols	TAG 50:4; TAG 14:0-18:2-18:2;	UVOGHPPAYFAQIT-AVIDDATOSA-N	131753663	CCCCCCCCCCCCCC(=O)OC[C@@H](COC(=O)CCCCCCC/C=C\C/C=C\CCCCC)OC(=O)CCCCCCC/C=C\C/C=C\CCCCC	0.88522	0.843609	0.850696	3.37709e-14	0	2.01002e-06	IMPC_CBC_017_001___1 point	Clinical Chemistry	Triglycerides	IMPC_CBC_017_001	20	20	20	20	significant	Different size	IMPC_CBC_017_001	_0057_91
20112	ONLI_0255	CSHPOS	Triacylglycerols	TAG 56:6; TAG 18:0-18:2-20:4;	CKEOSPBKHRUVTN-WDVRSESKSA-N	131750374	CCCCCCCCCCCCCCCCCC(=O)OC[C@@H](COC(=O)CCC/C=C\C/C=C\C/C=C\C/C=C\CCCCC)OC(=O)CCCCCCC/C=C\C/C=C\CCCCC	0.892537	0.909774	0.782249	1.03177e-14	2.62151e-06	4.59601e-05	IMPC_CBC_017_001___1 point	Clinical Chemistry	Triglycerides	IMPC_CBC_017_001	20	20	20	20	significant	Different size	IMPC_CBC_017_001	_0057_92
2026	ONLI_0256	CSHPOS	Triacylglycerols	TAG 58:4; TAG 18:1-18:2-22:1;	ODZGUPAQUQGEKA-MJECLYFESA-N	131760188	CCCCCCCC/C=C\CCCCCCCCCCCC(=O)OC[C@H](COC(=O)CCCCCCCCC/C=C\CCCCCC)OC(=O)CCCCCCC/C=C\C/C=C\CCCCC	0.831277	0.796992	0.782249	3.11415e-11	3.33058e-05	4.59601e-05	IMPC_CBC_017_001___1 point	Clinical Chemistry	Triglycerides	IMPC_CBC_017_001	20	20	20	20	significant	Different size	IMPC_CBC_017_001	_0057_93
2055	ONLI_0259	CSHPOS	Triacylglycerols	TAG 53:3; TAG 17:0-18:1-18:2;	JCUUGUUICZELJG-KDHVXLOFSA-N	138183776	CCCCCCCCCCCCCCCCC(=O)OCC(COC(=O)CCCCCCCC/C=C\C=C/CCCCC)OC(=O)CCCCCCCCC/C=C\CCCCCC	0.947512	0.962406	0.875517	2.05448e-20	6.49947e-06	4.30212e-07	IMPC_CBC_017_001___1 point	Clinical Chemistry	Triglycerides	IMPC_CBC_017_001	20	20	20	20	significant	Different size	IMPC_CBC_017_001	_0057_94
20711	ONLI_0261	CSHPOS	Triacylglycerols	TAG 58:6; TAG 18:1-20:1-20:4;	GSNFRUMSEHHPSY-ZGZATPIUSA-N	131750413	CCCCCCCC/C=C\CCCCCCCCCC(=O)O[C@@H](COC(=O)CCCCCCC/C=C\CCCCCCCC)COC(=O)CCC/C=C\C/C=C\C/C=C\C/C=C\CCCCC	0.851729	0.926316	0.606243	3.228e-12	4.50556e-06	0.0046031	IMPC_CBC_017_001___1 point	Clinical Chemistry	Triglycerides	IMPC_CBC_017_001	20	20	20	20	significant	Different size	IMPC_CBC_017_001	_0057_96
2089	ONLI_0262	CSHPOS	Triacylglycerols	TAG 55:3; TAG 15:0-19:0-21:3;	0	NA	0	0.841972	0.73985	0.789018	9.90525e-12	0.000290025	3.55264e-05	IMPC_CBC_017_001___1 point	Clinical Chemistry	Triglycerides	IMPC_CBC_017_001	20	20	20	20	significant	Different size	IMPC_CBC_017_001	_0057_97
20922	ONLI_0263	CSHPOS	Phosphatidylcholines	PC34:2	JLPULHDHAOZNQI-ZTIMHPMXSA-N	5287971	CCCCCCCCCCCCCCCC(=O)OC[C@H](COP(=O)([O-])OCC[N+](C)(C)C)OC(=O)CCCCCCC/C=C\C/C=C\CCCCC	0.71645	0.455639	0.776984	2.00533e-07	0.0450045	5.58098e-05	IMPC_CBC_017_001___1 point	Clinical Chemistry	Triglycerides	IMPC_CBC_017_001	20	20	20	20	significant	Different size	IMPC_CBC_017_001	_0057_98
21215	ONLI_0266	CSHPOS	Triacylglycerols	TAG 49:3; TAG 15:0-16:1-18:2;	CQSXCZMDDSQLAG-RLFYQNGLSA-N	131754333	CCCCCCCCCCCCCCC(=O)OC[C@@H](COC(=O)CCCCCCC/C=C\C/C=C\CCCCC)OC(=O)CCCCCCC/C=C\CCCCCC	0.875854	0.854386	0.864987	2.89126e-13	0	8.58381e-07	IMPC_CBC_017_001___1 point	Clinical Chemistry	Triglycerides	IMPC_CBC_017_001	19	20	20	20	significant	Different size	IMPC_CBC_017_001	_0057_100
21410	ONLI_0268	CSHPOS	Triacylglycerols	TAG 58:2; TAG 18:0-18:2-22:0;	VTHDNMHRPKXWMZ-WMMWWMJFSA-N	131756084	CCCCCCCCCCCCCCCCCCCCCC(=O)OC[C@H](COC(=O)CCCCCCCCCCCCCCCCC)OC(=O)CCCCCCC/C=C\C/C=C\CCCCC	0.640215	0.503509	0.53554	1.13821e-05	0.0296556	0.0149521	IMPC_CBC_017_001___1 point	Clinical Chemistry	Triglycerides	IMPC_CBC_017_001	19	20	20	20	significant	Different size	IMPC_CBC_017_001	_0057_102
21610	ONLI_0270	CSHPOS	Triacylglycerols	TAG 50:2; TAG 16:0-16:0-18:2;	MTWYSKGJIDFSRC-IICCMCGVSA-N	25240356	CCCCCCCCCCCCCCCC(=O)OC[C@H](COC(=O)CCCCCCC/C=C\C/C=C\CCCCC)OC(=O)CCCCCCCCCCCCCCC	0.904733	0.881203	0.851448	1.16697e-15	0	1.92625e-06	IMPC_CBC_017_001___1 point	Clinical Chemistry	Triglycerides	IMPC_CBC_017_001	20	20	20	20	significant	Different size	IMPC_CBC_017_001	_0057_104
2247	ONLI_0278	CSHPOS	Triacylglycerols	TAG 58:5; TAG 18:1-18:2-22:2;	NRIOEETWLZWDRL-NUDAZDJUSA-N	131760195	CCCCCC/C=C\CCCCCCCCCC(=O)OC[C@@H](COC(=O)CCCCCCCCCCC/C=C\C/C=C\CCCCC)OC(=O)CCCCCCC/C=C\C/C=C\CCCCC	0.835874	0.827068	0.743889	1.92248e-11	2.24499e-06	0.000169876	IMPC_CBC_017_001___1 point	Clinical Chemistry	Triglycerides	IMPC_CBC_017_001	20	20	20	20	significant	Different size	IMPC_CBC_017_001	_0057_111
2266	ONLI_0281	CSHPOS	Triacylglycerols	TAG 49:1; TAG 15:0-16:0-18:1;	KWXJMBTWCDOOOM-FMXLGRSFSA-N	131754160	CCCCCCCCCCCCCCCC(=O)O[C@@H](COC(=O)CCCCCCCCCCCCCC)COC(=O)CCCCCCCCC/C=C\CCCCCC	0.906328	0.900752	0.809327	8.58899e-16	1.39393e-06	1.54732e-05	IMPC_CBC_017_001___1 point	Clinical Chemistry	Triglycerides	IMPC_CBC_017_001	20	20	20	20	significant	Different size	IMPC_CBC_017_001	_0057_112
22721	ONLI_0282	CSHPOS	Phosphatidylcholines	PC38:2	KXXLFCAPKGRXBT-FMJYHZMHSA-N	24779263	CCCCCCCCCCCCCCCCCCCC(=O)OC[C@H](COP(=O)([O-])OCC[N+](C)(C)C)OC(=O)CCCCCCC/C=C\C/C=C\CCCCC	0.678174	0.491729	0.62956	1.52258e-06	0.0292073	0.00293515	IMPC_CBC_017_001___1 point	Clinical Chemistry	Triglycerides	IMPC_CBC_017_001	20	20	20	20	significant	Different size	IMPC_CBC_017_001	_0057_113
2298	ONLI_0284	CSHPOS	Triacylglycerols	TAG 58:4; TAG 18:2-18:2-22:0;	OEWUGNNMLZAOCV-HESLGCGWSA-N	25240386	CCCCCCCCCCCCCCCCCCCCCC(=O)OC[C@@H](COC(=O)CCCCCCC/C=C\C/C=C\CCCCC)OC(=O)CCCCCCC/C=C\C/C=C\CCCCC	0.839251	0.803008	0.774727	1.33607e-11	2.38516e-05	6.05582e-05	IMPC_CBC_017_001___1 point	Clinical Chemistry	Triglycerides	IMPC_CBC_017_001	20	20	20	20	significant	Different size	IMPC_CBC_017_001	_0057_115
2377	ONLI_0292	CSHPOS	Triacylglycerols	TAG 52:3; TAG 16:1-18:1-18:1;	YBWITEZBUYUNFC-JZBMGIQCSA-N	102240596	CCCCCCCC/C=C\CCCCCCCC(=O)OC[C@H](COC(=O)CCCCCCC/C=C\CCCCCC)OC(=O)CCCCCCC/C=C\CCCCCCCC	0.91524	0.905263	0.877021	1.3914e-16	2.02107e-06	3.87828e-07	IMPC_CBC_017_001___1 point	Clinical Chemistry	Triglycerides	IMPC_CBC_017_001	20	20	20	20	significant	Different size	IMPC_CBC_017_001	_0057_122
23811	ONLI_0293	CSHPOS	Triacylglycerols	TAG 51:4; TAG 15:0-16:0-20:4;	LVHOHHSODZICOO-IIKXJSSRSA-N	131750647	CCCCCCCCCCCCCCCC(=O)O[C@@H](COC(=O)CCCCCCCCCCCCCC)COC(=O)CCC/C=C\C/C=C\C/C=C\C/C=C\CCCCC	0.868615	0.897744	0.737871	3.78575e-13	9.64874e-07	0.000204349	IMPC_CBC_017_001___1 point	Clinical Chemistry	Triglycerides	IMPC_CBC_017_001	20	20	20	20	significant	Different size	IMPC_CBC_017_001	_0057_123
23910	ONLI_0294	CSHPOS	Triacylglycerols	TAG 56:6; TAG 16:0-18:1-22:5;	LXKOOMKDVRTCPD-NMQVVHJTSA-N	131755185	CCCCCCCCCCCCCCCC(=O)OC[C@@H](COC(=O)CCCCC/C=C\C/C=C\C/C=C\C/C=C\C/C=C\CC)OC(=O)CCCCCCCCC/C=C\CCCCCC	0.901168	0.936842	0.765701	2.27171e-15	5.39341e-06	8.32022e-05	IMPC_CBC_017_001___1 point	Clinical Chemistry	Triglycerides	IMPC_CBC_017_001	20	20	20	20	significant	Different size	IMPC_CBC_017_001	_0057_124
24212	ONLI_0299	CSHPOS	Triacylglycerols	TAG 51:4; TAG 16:0-17:2-18:2;	MBVRTVOCODAFTO-ZQYFXHSESA-N	138208584	CCCCCCCCCCCCCCCC(=O)OCC(COC(=O)CCCCCCCC/C=C\C=C/CCCCC)OC(=O)CCCCCCCCC/C=C\C/C=C\CC	0.881749	0.866165	0.813088	5.76468e-14	0	1.31249e-05	IMPC_CBC_017_001___1 point	Clinical Chemistry	Triglycerides	IMPC_CBC_017_001	20	20	20	20	significant	Different size	IMPC_CBC_017_001	_0057_125
2447	ONLI_0301	CSHPOS	Triacylglycerols	TAG 52:3; TAG 16:0-18:0-18:3;	QRLNWUKVSNTXQG-VWMLCLGZSA-N	131755026	CCCCCCCCCCCCCCCCCC(=O)O[C@@H](COC(=O)CCCCCCCCCCCCCCC)COC(=O)CCCCCCC/C=C\C/C=C\C/C=C\CC	0.608096	0.64812	0.452802	3.15234e-05	0.00254541	0.0449849	IMPC_CBC_017_001___1 point	Clinical Chemistry	Triglycerides	IMPC_CBC_017_001	20	20	20	20	significant	Different size	IMPC_CBC_017_001	_0057_127
24819	ONLI_0306	CSHPOS	Phosphatidylcholines	PC35:2 A	MJWAVUYQCBFFHQ-WESJWMGVSA-N	52922721	CCCCCCCCCCCCCCCCC(=O)O[C@H](COC(=O)CCCCCCC/C=C\C/C=C\CCCCC)COP(=O)([O-])OCC[N+](C)(C)C	0.708382	0.628571	0.635577	3.15716e-07	0.00368474	0.00259826	IMPC_CBC_017_001___1 point	Clinical Chemistry	Triglycerides	IMPC_CBC_017_001	20	20	20	20	significant	Different size	IMPC_CBC_017_001	_0057_129
2498	ONLI_0307	CSHPOS	Triacylglycerols	TAG 53:3; TAG 17:0-17:0-19:3;	0	NA	0	0.924996	0.873684	0.882287	1.48579e-17	0	2.66854e-07	IMPC_CBC_017_001___1 point	Clinical Chemistry	Triglycerides	IMPC_CBC_017_001	20	20	20	20	significant	Different size	IMPC_CBC_017_001	_0057_130
25126	ONLI_0310	CSHPOS	Lineolic acids and derivatives	DAG 36:4; DAG 18:2-18:2;	MQGBAQLIFKSMEM-ZHARMHCNSA-N	9543729	CCCCC/C=C\C/C=C\CCCCCCCC(=O)OC[C@H](CO)OC(=O)CCCCCCC/C=C\C/C=C\CCCCC	0.744688	0.73985	0.60173	3.59643e-08	0.000290025	0.00500245	IMPC_CBC_017_001___1 point	Clinical Chemistry	Triglycerides	IMPC_CBC_017_001	20	20	20	20	significant	Different size	IMPC_CBC_017_001	_0057_131
2527	ONLI_0311	CSHPOS	Triacylglycerols	TAG 55:4; TAG 18:1-18:2-19:1;	MUPLOFIEWBEBDZ-GMWWFSEGSA-N	138214690	CCCCCCCCC/C=C\CCCCCCCC(=O)OCC(COC(=O)CCCCCCCCC/C=C\CCCCCC)OC(=O)CCCCCCCC/C=C\C=C/CCCCC	0.858483	0.875188	0.752163	1.41592e-12	0	0.00013068	IMPC_CBC_017_001___1 point	Clinical Chemistry	Triglycerides	IMPC_CBC_017_001	20	20	20	20	significant	Different size	IMPC_CBC_017_001	_0057_132
25313	ONLI_0312	CSHPOS	Triacylglycerols	TAG 48:4; TAG 12:0-18:2-18:2;	MVLRQPPTISTJFW-ZHSZNRNPSA-N	138214981	CCCCCCCCCCCC(=O)OCC(COC(=O)CCCCCCCC/C=C\C=C/CCCCC)OC(=O)CCCCCCCC/C=C\C=C/CCCCC	0.886381	0.905263	0.838661	6.15587e-14	0	3.8556e-06	IMPC_CBC_017_001___1 point	Clinical Chemistry	Triglycerides	IMPC_CBC_017_001	19	20	20	20	significant	Different size	IMPC_CBC_017_001	_0057_133
25413	ONLI_0313	CSHPOS	Phosphatidylethanolamines	PE 18:1-18:1;	MWRBNPKJOOWZPW-NYVOMTAGSA-N	9546757	CCCCCCCC/C=C\CCCCCCCC(=O)OC[C@H](COP(=O)(O)OCCN)OC(=O)CCCCCCC/C=C\CCCCCCCC	0.770486	0.699248	0.67469	6.08685e-09	0.000846725	0.00110179	IMPC_CBC_017_001___1 point	Clinical Chemistry	Triglycerides	IMPC_CBC_017_001	20	20	20	20	significant	Different size	IMPC_CBC_017_001	_0057_134
25612	ONLI_0315	CSHPOS	Triacylglycerols	TAG 54:8; TAG 16:0-18:3-20:5;	MLMMWEQUUKJWQX-VOLMLRHSSA-N	131755359	CCCCCCCCCCCCCCCC(=O)OC[C@@H](COC(=O)CCC/C=C\C/C=C\C/C=C\C/C=C\C/C=C\CC)OC(=O)CCCC/C=C\C/C=C\C/C=C\CCCCC	0.744406	0.545865	0.818353	3.66254e-08	0.0141083	1.03591e-05	IMPC_CBC_017_001___1 point	Clinical Chemistry	Triglycerides	IMPC_CBC_017_001	20	20	20	20	significant	Different size	IMPC_CBC_017_001	_0057_136
26010	ONLI_0319	CSHPOS	Triacylglycerols	TAG 55:4; TAG 15:1-19:0-21:3;	NJIJHXNPEZSWHJ-GGRUKSBGSA-N	138219306	CCCCCCCCCCCCCCCCCCC(=O)OC(COC(=O)CCCCCCC/C=C\CCCCC)COC(=O)CCCCCCC/C=C\C=C/C=C\CCCCCCC	0.842535	0.742857	0.810831	9.30406e-12	0.000265205	1.44935e-05	IMPC_CBC_017_001___1 point	Clinical Chemistry	Triglycerides	IMPC_CBC_017_001	20	20	20	20	significant	Different size	IMPC_CBC_017_001	_0057_139
2637	ONLI_0322	CSHPOS	Triacylglycerols	TAG 54:4; TAG 16:1-18:0-20:3;	IJAGVFPXKMAQRV-PGYKOVLESA-N	131759314	CCCCCCCCCCCCCCCCCC(=O)O[C@@H](COC(=O)CCCCCCC/C=C\CCCCCC)COC(=O)CCC/C=C\C/C=C\C/C=C\CCCCCCCC	0.844223	0.890226	0.719067	7.69933e-12	0	0.00035324	IMPC_CBC_017_001___1 point	Clinical Chemistry	Triglycerides	IMPC_CBC_017_001	20	20	20	20	significant	Different size	IMPC_CBC_017_001	_0057_141
2699	ONLI_0328	CSHPOS	Triacylglycerols	TAG 54:5; TAG 18:0-18:2-18:3;	FOOVNYMOCOZYCS-FEJMAITCSA-N	131756093	CCCCCCCCCCCCCCCCCC(=O)OC[C@@H](COC(=O)CCCC/C=C\C/C=C\C/C=C\CCCCC)OC(=O)CCCCCCC/C=C\C/C=C\CCCCC	0.811014	0.891729	0.714554	2.2252e-10	9.31678e-08	0.000400291	IMPC_CBC_017_001___1 point	Clinical Chemistry	Triglycerides	IMPC_CBC_017_001	20	20	20	20	significant	Different size	IMPC_CBC_017_001	_0057_145
2759	ONLI_0334	CSHPOS	Triacylglycerols	TAG 46:1; TAG 14:0-16:0-16:1;	JYICXCHHKWVGEI-FIZKWYBOSA-N	131753273	CCCCCCCCCCCCCCCC(=O)O[C@@H](COC(=O)CCCCCCCCCCCCC)COC(=O)CCCCCCC/C=C\CCCCCC	0.886158	0.809023	0.851448	2.91405e-14	1.62733e-05	1.92625e-06	IMPC_CBC_017_001___1 point	Clinical Chemistry	Triglycerides	IMPC_CBC_017_001	20	20	20	20	significant	Different size	IMPC_CBC_017_001	_0057_151
27820	ONLI_0337	CSHPOS	Lineolic acids and derivatives	DAG 36:5; DAG 18:2-18:3;	PGXBELQFNRPKBC-WBVIKXMWSA-N	9543737	CCCCC/C=C\C/C=C\CCCCCCCC(=O)OC[C@H](CO)OC(=O)CCCCCCC/C=C\C/C=C\C/C=C\CC	0.792532	0.745865	0.67469	1.10124e-09	0.000242084	0.00110179	IMPC_CBC_017_001___1 point	Clinical Chemistry	Triglycerides	IMPC_CBC_017_001	20	20	20	20	significant	Different size	IMPC_CBC_017_001	_0057_153
2818	ONLI_0340	CSHPOS	Triacylglycerols	TAG 54:6; TAG 18:1-18:2-18:3;	OTUIORVXGJUHBH-JBQDKWDBSA-N	100921577	CCCCCCCC/C=C\CCCCCCCC(=O)OC[C@@H](COC(=O)CCCCCCC/C=C\C/C=C\C/C=C\CC)OC(=O)CCCCCCC/C=C\C/C=C\CCCCC	0.811952	0.887218	0.733358	2.04227e-10	0	0.000233979	IMPC_CBC_017_001___1 point	Clinical Chemistry	Triglycerides	IMPC_CBC_017_001	20	20	20	20	significant	Different size	IMPC_CBC_017_001	_0057_155
2857	ONLI_0344	CSHPOS	1-alkyl,2-acylglycero-3-phosphocholines	PCo-34:3	QEWRXEALGMKRGP-MZWPLUPDSA-N	24779293	CCCCCCCCCCCCCCCCOC[C@H](COP(=O)([O-])OCC[N+](C)(C)C)OC(=O)CCCC/C=C\C/C=C\C/C=C\CCCCC	0.717388	0.524812	0.564874	1.90033e-07	0.0189528	0.00945725	IMPC_CBC_017_001___1 point	Clinical Chemistry	Triglycerides	IMPC_CBC_017_001	20	20	20	20	significant	Different size	IMPC_CBC_017_001	_0057_157
29114	ONLI_0350	CSHPOS	Triacylglycerols	TAG 53:4; TAG 17:1-18:1-18:2;	VESVDAJIPQIOEH-NAAHWEMHSA-N	9544155	CCCCCCCC/C=C\CCCCCCCC(=O)O[C@H](COC(=O)CCCCCCC/C=C\CCCCCCC)COC(=O)CCCCCCC/C=C\C/C=C\CCCCC	0.916459	0.947368	0.864235	1.06799e-16	6.02399e-06	8.99806e-07	IMPC_CBC_017_001___1 point	Clinical Chemistry	Triglycerides	IMPC_CBC_017_001	20	20	20	20	significant	Different size	IMPC_CBC_017_001	_0057_160
29312	ONLI_0352	CSHPOS	Triacylglycerols	TAG 56:8; TAG 16:0-18:2-22:6;	RDZINTYLBOTMAU-CQEMWSBKSA-N	131755335	CCCCCCCCCCCCCCCC(=O)OC[C@@H](COC(=O)CC/C=C\C/C=C\C/C=C\C/C=C\C/C=C\C/C=C\CC)OC(=O)CCCCCCC/C=C\C/C=C\CCCCC	0.615976	0.461654	0.637834	2.32486e-05	0.0419875	0.00248055	IMPC_CBC_017_001___1 point	Clinical Chemistry	Triglycerides	IMPC_CBC_017_001	20	20	20	20	significant	Different size	IMPC_CBC_017_001	_0057_161
2978	ONLI_0356	CSHPOS	Triacylglycerols	TAG 52:1; TAG 16:0-18:0-18:1;	NPCZZYKITFKRQZ-RFBIWTDZSA-N	5365005	CCCCCCCCCCCCCCCCCC(=O)OC(COC(=O)CCCCCCCCCCCCCCC)COC(=O)CCCCCCC/C=C\CCCCCCCC	0.88916	0.885714	0.864987	1.80188e-14	0	8.58381e-07	IMPC_CBC_017_001___1 point	Clinical Chemistry	Triglycerides	IMPC_CBC_017_001	20	20	20	20	significant	Different size	IMPC_CBC_017_001	_0057_164
30011	ONLI_0360	CSHPOS	Triacylglycerols	TAG 50:5; TAG 14:0-16:0-20:5;	REVSLNKZXRDJPV-ROXMGXQMSA-N	131753291	CCCCCCCCCCCCCCCC(=O)O[C@@H](COC(=O)CCCCCCCCCCCCC)COC(=O)CCC/C=C\C/C=C\C/C=C\C/C=C\C/C=C\CC	0.85914	0.762406	0.886047	1.30396e-12	0.000141345	2.02086e-07	IMPC_CBC_017_001___1 point	Clinical Chemistry	Triglycerides	IMPC_CBC_017_001	20	20	20	20	significant	Different size	IMPC_CBC_017_001	_0057_166
3018	ONLI_0361	CSHPOS	Triacylglycerols	TAG 58:3; TAG 18:1-18:2-22:0;	REWHXIGYTWQEOU-RUAITIBSSA-N	138251358	CCCCCCCCCCCCCCCCCCCCCC(=O)OCC(COC(=O)CCCCCCCCC/C=C\CCCCCC)OC(=O)CCCCCCCC/C=C\C=C/CCCCC	0.830527	0.760902	0.718315	3.36469e-11	0.000148858	0.000360737	IMPC_CBC_017_001___1 point	Clinical Chemistry	Triglycerides	IMPC_CBC_017_001	20	20	20	20	significant	Different size	IMPC_CBC_017_001	_0057_167
3059	ONLI_0365	CSHPOS	Triacylglycerols	TAG 52:4; TAG 16:0-18:1-18:3;	VMDPPWLXQNSYER-RPLIZZJZSA-N	131755181	CCCCCCCCCCCCCCCC(=O)OC[C@@H](COC(=O)CCCCCCC/C=C\C/C=C\C/C=C\CC)OC(=O)CCCCCCCCC/C=C\CCCCCC	0.863737	0.827068	0.830387	7.23933e-13	2.24499e-06	5.85703e-06	IMPC_CBC_017_001___1 point	Clinical Chemistry	Triglycerides	IMPC_CBC_017_001	20	20	20	20	significant	Different size	IMPC_CBC_017_001	_0057_171
3078	ONLI_0367	CSHPOS	Phosphatidylcholines	PC33:2	SBNDHGBVMZMSNL-UESLNCBNSA-N	52922715	CCCCCCCCCCCCCCC(=O)O[C@H](COC(=O)CCCCCCC/C=C\C/C=C\CCCCC)COP(=O)([O-])OCC[N+](C)(C)C	0.679957	0.476692	0.615269	1.3947e-06	0.0351387	0.0038831	IMPC_CBC_017_001___1 point	Clinical Chemistry	Triglycerides	IMPC_CBC_017_001	20	20	20	20	significant	Different size	IMPC_CBC_017_001	_0057_173
3098	ONLI_0369	CSHPOS	Triacylglycerols	TAG 51:2; TAG 16:0-17:0-18:2;	SEJGBQZTRJHHNJ-OCGDUTRDSA-N	138259707	CCCCCCCCCCCCCCCCC(=O)OC(COC(=O)CCCCCCCCCCCCCCC)COC(=O)CCCCCCCC/C=C\C=C/CCCCC	0.92115	0.900752	0.838661	3.71385e-17	1.39393e-06	3.8556e-06	IMPC_CBC_017_001___1 point	Clinical Chemistry	Triglycerides	IMPC_CBC_017_001	20	20	20	20	significant	Different size	IMPC_CBC_017_001	_0057_174
31612	ONLI_0378	CSHPOS	Phosphatidylethanolamines	PE 36:4; PE 18:2-18:2;	SSCDRSKJTAQNNB-DWEQTYCFSA-N	9546812	CCCCC/C=C\C/C=C\CCCCCCCC(=O)OC[C@H](COP(=O)(O)OCCN)OC(=O)CCCCCCC/C=C\C/C=C\CCCCC	0.687556	0.533835	0.449041	9.52947e-07	0.0167341	0.0470223	IMPC_CBC_017_001___1 point	Clinical Chemistry	Triglycerides	IMPC_CBC_017_001	20	20	20	20	significant	Different size	IMPC_CBC_017_001	_0057_179
3225	ONLI_0384	CSHPOS	Triacylglycerols	TAG 55:3; TAG 18:1-18:2-19:0;	UAIFODZHZUTFRI-RUAITIBSSA-N	138268805	CCCCCCCCCCCCCCCCCCC(=O)OCC(COC(=O)CCCCCCCCC/C=C\CCCCCC)OC(=O)CCCCCCCC/C=C\C=C/CCCCC	0.861016	0.846617	0.764949	1.02814e-12	0	8.53809e-05	IMPC_CBC_017_001___1 point	Clinical Chemistry	Triglycerides	IMPC_CBC_017_001	20	20	20	20	significant	Different size	IMPC_CBC_017_001	_0057_183
32414	ONLI_0386	CSHPOS	Triacylglycerols	TAG 52:4; TAG 16:0-18:2-18:2;	LXAWUIOWWNQCQA-QOFSRLOCSA-N	97042228	CCCCCCCCCCCCCCCC(=O)OC[C@@H](COC(=O)CCCCCCC/C=C\C/C=C\CCCCC)OC(=O)CCCCCCC/C=C\C/C=C\CCCCC	0.872461	0.857143	0.835653	2.2292e-13	0	4.50054e-06	IMPC_CBC_017_001___1 point	Clinical Chemistry	Triglycerides	IMPC_CBC_017_001	20	20	20	20	significant	Different size	IMPC_CBC_017_001	_0057_185
32510	ONLI_0387	CSHPOS	Triacylglycerols	TAG 53:2; TAG 17:0-18:1-18:1;	ANBFFIILUQJIQL-AWWAHHQNSA-N	131802077	CCCCCCCCCCCCCCCCC(=O)OC[C@@H](COC(=O)CCCCCCC/C=C\CCCCCCCC)OC(=O)CCCCCCC/C=C\CCCCCCCC	0.924527	0.914286	0.850696	1.6657e-17	3.18884e-06	2.01002e-06	IMPC_CBC_017_001___1 point	Clinical Chemistry	Triglycerides	IMPC_CBC_017_001	20	20	20	20	significant	Different size	IMPC_CBC_017_001	_0057_186
32711	ONLI_0389	CSHPOS	Triacylglycerols	TAG 52:2; TAG 16:0-18:0-18:2;	MDCUASFVKLEFPW-NXNLMSDJSA-N	131750341	CCCCCCCCCCCCCCCCCC(=O)O[C@@H](COC(=O)CCCCCCCCCCCCCCC)COC(=O)CCCCCCC/C=C\C/C=C\CCCCC	0.893475	0.891729	0.812336	8.80834e-15	9.31678e-08	1.35681e-05	IMPC_CBC_017_001___1 point	Clinical Chemistry	Triglycerides	IMPC_CBC_017_001	20	20	20	20	significant	Different size	IMPC_CBC_017_001	_0057_187
33111	ONLI_0393	CSHPOS	Triacylglycerols	TAG 48:1; TAG 14:0-16:0-18:1;	UPTISBGEYYYCRS-DLOIZKPKSA-N	131753274	CCCCCCCCCCCCCCCC(=O)O[C@@H](COC(=O)CCCCCCCCCCCCC)COC(=O)CCCCCCCCC/C=C\CCCCCC	0.896196	0.857143	0.828131	5.52106e-15	0	6.53941e-06	IMPC_CBC_017_001___1 point	Clinical Chemistry	Triglycerides	IMPC_CBC_017_001	20	20	20	20	significant	Different size	IMPC_CBC_017_001	_0057_189
3383	ONLI_0400	CSHPOS	Triacylglycerols	TAG 58:8; TAG 18:1-18:1-22:6;	VULLTLRIKFDMHX-IPUZCYPISA-N	131760077	CCCCCC/C=C\CCCCCCCCCC(=O)OC[C@@H](COC(=O)CC/C=C\C/C=C\C/C=C\C/C=C\C/C=C\C/C=C\CC)OC(=O)CCCCCCCCC/C=C\CCCCCC	0.494488	0.457143	0.520496	0.00118139	0.0442348	0.018631	IMPC_CBC_017_001___1 point	Clinical Chemistry	Triglycerides	IMPC_CBC_017_001	20	20	20	20	significant	Different size	IMPC_CBC_017_001	_0057_191
34310	ONLI_0405	CSHPOS	Triacylglycerols	TAG 49:2; TAG 15:0-16:0-18:2;	DDWAXVHDVUVXSQ-ZDFZEWNHSA-N	131754166	CCCCCCCCCCCCCCCC(=O)O[C@@H](COC(=O)CCCCCCCCCCCCCC)COC(=O)CCCCCCC/C=C\C/C=C\CCCCC	0.898541	0.87218	0.825122	3.65244e-15	0	7.55617e-06	IMPC_CBC_017_001___1 point	Clinical Chemistry	Triglycerides	IMPC_CBC_017_001	20	20	20	20	significant	Different size	IMPC_CBC_017_001	_0057_195
3446	ONLI_0406	CSHPOS	Triacylglycerols	TAG 58:6; TAG 18:1-18:2-22:3;	WCIIIQSFALPOGU-CIRMXUQZSA-N	138286297	CCCCCC/C=C\CCCCCCCCCC(=O)OCC(COC(=O)CCCCCCCCCCC/C=C\C/C=C\C/C=C\CC)OC(=O)CCCCCCCC/C=C\C=C/CCCCC	0.844505	0.765414	0.71305	7.45857e-12	0.000127184	0.000417115	IMPC_CBC_017_001___1 point	Clinical Chemistry	Triglycerides	IMPC_CBC_017_001	20	20	20	20	significant	Different size	IMPC_CBC_017_001	_0057_196
3479	ONLI_0409	CSHPOS	Triacylglycerols	TAG 54:5; TAG 16:0-18:1-20:4;	WKSLEDJKCJNITP-AHQIBYCWSA-N	131755177	CCCCCCCCCCCCCCCC(=O)OC[C@@H](COC(=O)CCC/C=C\C/C=C\C/C=C\C/C=C\CCCCC)OC(=O)CCCCCCCCC/C=C\CCCCCC	0.761949	0.912782	0.637082	1.12285e-08	3.00375e-06	0.00251928	IMPC_CBC_017_001___1 point	Clinical Chemistry	Triglycerides	IMPC_CBC_017_001	20	20	20	20	significant	Different size	IMPC_CBC_017_001	_0057_199
3505	ONLI_0412	CSHPOS	Triacylglycerols	TAG 56:3; TAG 14:0-20:0-22:3;	WOXDUJQRLLENEU-JYISLEBKSA-N	138290251	CCCCCCCCCCCCCCCCCCCC(=O)OC(COC(=O)CCCCCCCCCCCCC)COC(=O)CCCCCCCCCCC/C=C\C/C=C\C/C=C\CC	0.839814	0.804511	0.837909	1.25643e-11	2.17922e-05	4.00877e-06	IMPC_CBC_017_001___1 point	Clinical Chemistry	Triglycerides	IMPC_CBC_017_001	20	20	20	20	significant	Different size	IMPC_CBC_017_001	_0057_200
35111	ONLI_0413	CSHPOS	Triacylglycerols	TAG 53:4; TAG 16:0-17:0-20:4;	WQFNYIJLJYJWKK-BNJGEZIZSA-N	134776734	CCCCCCCCCCCCCCCCC(=O)O[C@H](COC(=O)CCCCCCCCCCCCCCC)COC(=O)CCC/C=C/C/C=C/C/C=C/C/C=C/CCCCC	0.886158	0.858647	0.795036	2.91405e-14	0	2.80379e-05	IMPC_CBC_017_001___1 point	Clinical Chemistry	Triglycerides	IMPC_CBC_017_001	20	20	20	20	significant	Different size	IMPC_CBC_017_001	_0057_201
35312	ONLI_0415	CSHPOS	Triacylglycerols	TAG 51:5; TAG 15:0-18:2-18:3;	VEGWTLAYXMHOLL-HHBBQONFSA-N	131754537	CCCCCCCCCCCCCCC(=O)OC[C@@H](COC(=O)CCCCCCC/C=C\C/C=C\C/C=C\CC)OC(=O)CCCCCCC/C=C\C/C=C\CCCCC	0.82656	0.815789	0.761941	9.05924e-11	1.92403e-05	9.45936e-05	IMPC_CBC_017_001___1 point	Clinical Chemistry	Triglycerides	IMPC_CBC_017_001	19	20	20	20	significant	Different size	IMPC_CBC_017_001	_0057_202
3569	ONLI_0418	CSHPOS	Triacylglycerols	TAG 54:8; TAG 18:2-18:3-18:3;	IMPMCCKWZKDAGE-GLLBNYCSSA-N	97161142	CCCCC/C=C\C/C=C\CCCCCCCC(=O)OC[C@@H](COC(=O)CCCCCCC/C=C\C/C=C\C/C=C\CC)OC(=O)CCCCCCC/C=C\C/C=C\C/C=C\CC	0.814954	0.849624	0.74088	1.54701e-10	0	0.000186431	IMPC_CBC_017_001___1 point	Clinical Chemistry	Triglycerides	IMPC_CBC_017_001	20	20	20	20	significant	Different size	IMPC_CBC_017_001	_0057_204
36110	ONLI_0423	CSHPOS	Triacylglycerols	TAG 56:5; TAG 18:1-18:2-20:2;	HLTNSFGECJJVPF-SGFVPPCASA-N	131760192	CCCCCC/C=C\CCCCCCCCCC(=O)OC[C@@H](COC(=O)CCCCCCCCC/C=C\C/C=C\CCCCC)OC(=O)CCCCCCC/C=C\C/C=C\CCCCC	0.831559	0.760902	0.715307	3.02479e-11	0.000148858	0.000392098	IMPC_CBC_017_001___1 point	Clinical Chemistry	Triglycerides	IMPC_CBC_017_001	20	20	20	20	significant	Different size	IMPC_CBC_017_001	_0057_206
37123	ONLI_0434	CSHPOS	Triacylglycerols	TAG 47:1; TAG 15:0-16:0-16:1;	RCYIETYFTUBXFK-KWLHUJJFSA-N	131754159	CCCCCCCCCCCCCCCC(=O)O[C@@H](COC(=O)CCCCCCCCCCCCCC)COC(=O)CCCCCCC/C=C\CCCCCC	0.739849	0.53354	0.784555	1.6742e-07	0.0243928	6.97788e-05	IMPC_CBC_017_001___1 point	Clinical Chemistry	Triglycerides	IMPC_CBC_017_001	18	19	20	20	significant	Different size	IMPC_CBC_017_001	_0057_214
37217	ONLI_0435	CSHPOS	Phosphatidylethanolamines	PE36:2	ZTSRQLQWGSDQGP-RTJYTIBZSA-N	53479650	CCCCCCCC/C=C\CCCCCCCC(=O)OC[C@H](COP(=O)(O)OCCN)OC(=O)CCCCCCCCC/C=C\CCCCCC	0.782307	0.742857	0.704776	2.49396e-09	0.000265205	0.0005208	IMPC_CBC_017_001___1 point	Clinical Chemistry	Triglycerides	IMPC_CBC_017_001	20	20	20	20	significant	Different size	IMPC_CBC_017_001	_0057_215
37314	ONLI_0436	CSHPOS	1,2-diacylglycerols	DAG 34:1; DAG 16:0-18:1;	YEJYLHKQOBOSCP-OZKTZCCCSA-N	5282283	CCCCCCCCCCCCCCCC(=O)OC[C@H](CO)OC(=O)CCCCCCC/C=C\CCCCCCCC	0.800788	0.661654	0.755171	5.50264e-10	0.00194129	0.000118496	IMPC_CBC_017_001___1 point	Clinical Chemistry	Triglycerides	IMPC_CBC_017_001	20	20	20	20	significant	Different size	IMPC_CBC_017_001	_0057_216
37413	ONLI_0437	CSHPOS	Triacylglycerols	TAG 54:3; TAG 18:0-18:1-18:2;	TVLMJMFKNWRCGI-HIAAHSCQSA-N	131755942	CCCCCCCCCCCCCCCCCC(=O)OC[C@@H](COC(=O)CCCCCCC/C=C\C/C=C\CCCCC)OC(=O)CCCCCCCCC/C=C\CCCCCC	0.876401	0.897744	0.74765	1.27267e-13	9.64874e-07	0.000150965	IMPC_CBC_017_001___1 point	Clinical Chemistry	Triglycerides	IMPC_CBC_017_001	20	20	20	20	significant	Different size	IMPC_CBC_017_001	_0057_217
37510	ONLI_0438	CSHPOS	Triacylglycerols	TAG 56:5; TAG 18:0-18:1-20:4;	YGKXJDDGNQKJPT-COCAYHFYSA-N	131755946	CCCCCCCCCCCCCCCCCC(=O)OC[C@@H](COC(=O)CCC/C=C\C/C=C\C/C=C\C/C=C\CCCCC)OC(=O)CCCCCCCCC/C=C\CCCCCC	0.700596	0.819549	0.661903	4.82396e-07	6.73162e-06	0.00147795	IMPC_CBC_017_001___1 point	Clinical Chemistry	Triglycerides	IMPC_CBC_017_001	20	20	20	20	significant	Different size	IMPC_CBC_017_001	_0057_218
38119	ONLI_0445	CSHPOS	Phosphatidylcholines	PC 39:5; PC 19:0-20:5;	YTUVRFVITPTFSM-ZDQXWTFCSA-N	52922977	CCCCCCCCCCCCCCCCCCC(=O)OC[C@H](COP(=O)([O-])OCC[N+](C)(C)C)OC(=O)CCC/C=C\C/C=C\C/C=C\C/C=C\C/C=C\CC	0.629673	0.46015	0.476871	1.34233e-05	0.0427264	0.033508	IMPC_CBC_017_001___1 point	Clinical Chemistry	Triglycerides	IMPC_CBC_017_001	20	20	20	20	significant	Different size	IMPC_CBC_017_001	_0057_222
3908	ONLI_0454	CSHPOS	Triacylglycerols	TAG 50:1; TAG 16:0-16:0-18:1;	ZKEWGTVAIGJNBK-ZMSSUMMHSA-N	131750533	CCCCCCCCCCCCCCCC(=O)OC[C@@H](COC(=O)CCCCCCCCC/C=C\CCCCCC)OC(=O)CCCCCCCCCCCCCCC	0.898354	0.861654	0.845431	3.77658e-15	0	2.69078e-06	IMPC_CBC_017_001___1 point	Clinical Chemistry	Triglycerides	IMPC_CBC_017_001	20	20	20	20	significant	Different size	IMPC_CBC_017_001	_0057_229
39119	ONLI_0455	CSHPOS	Triacylglycerols	TAG 52:6; TAG 16:1-18:2-18:3;	NOOJQDXMGLPOOA-UJLFLSCOSA-N	131759571	CCCCCC/C=C\CCCCCCCC(=O)OC[C@@H](COC(=O)CCCCCCC/C=C\C/C=C\C/C=C\CC)OC(=O)CCCCCCC/C=C\C/C=C\CCCCC	0.837094	0.839098	0.74765	1.68736e-11	0	0.000150965	IMPC_CBC_017_001___1 point	Clinical Chemistry	Triglycerides	IMPC_CBC_017_001	20	20	20	20	significant	Different size	IMPC_CBC_017_001	_0057_230
44120	ONLI_0542	CSHNEG	Phytoceramides	Cer-NP t40:0; Cer-NP t18:0/22:0;	CIMNZQFRNXDRER-HIERITDVSA-N	5322153	CCCCCCCCCCCCCCCCCCCCCC(=O)N[C@@H](CO)[C@@H]([C@@H](CCCCCCCCCCCCCC)O)O	0.740842	0.744361	0.633321	4.60371e-08	0.000253438	0.0027206	IMPC_CBC_017_001___1 point	Clinical Chemistry	Triglycerides	IMPC_CBC_017_001	20	20	20	20	significant	Different size	IMPC_CBC_017_001	_0057_255
4458	ONLI_0547	CSHNEG	Phosphatidylethanolamines	PE 34:1; PE 16:0-18:1;	FHQVHHIBKUMWTI-OTMQOFQLSA-N	5283496	CCCCCCCCCCCCCCCC(=O)OC[C@H](COP(=O)(O)OCCN)OC(=O)CCCCCCC/C=C\CCCCCCCC	0.755664	0.796992	0.66416	1.73456e-08	3.33058e-05	0.00140468	IMPC_CBC_017_001___1 point	Clinical Chemistry	Triglycerides	IMPC_CBC_017_001	20	20	20	20	significant	Different size	IMPC_CBC_017_001	_0057_258
44914	ONLI_0551	CSHNEG	Phytoceramides	Cer-NP t42:0; Cer-NP t18:0/24:0;	ZESJDNWGTANZCC-UHYFRKBVSA-N	129678169	[2H]CCCCCCCCCCCCCCCCCCCCCCCC(=O)N[C@@H](CO)[C@@H]([C@@H](CCCCCCCCCCCCCC)O)O	0.694216	0.631579	0.608499	6.76031e-07	0.00348625	0.00441352	IMPC_CBC_017_001___1 point	Clinical Chemistry	Triglycerides	IMPC_CBC_017_001	20	20	20	20	significant	Different size	IMPC_CBC_017_001	_0057_262
45310	ONLI_0556	CSHNEG	Phosphatidylethanolamines	PE 36:4; PE 16:0-20:4;	NQIMLWFRWGTTOZ-JGGKAAGMSA-N	53479588	CCCCCCCCCCCCCCCC(=O)OC[C@H](COP(=O)(O)OCCN)OC(=O)CCCCCC/C=C\C/C=C\C/C=C\C/C=C\CC	0.619823	0.530827	0.478375	1.99778e-05	0.0174489	0.0328752	IMPC_CBC_017_001___1 point	Clinical Chemistry	Triglycerides	IMPC_CBC_017_001	20	20	20	20	significant	Different size	IMPC_CBC_017_001	_0057_266
45412	ONLI_0557	CSHNEG	Phosphatidylethanolamines	PE 36:3	DOILLFCKSSPXMF-ZKZIFNJMSA-N	52924364	CCCCCCCC/C=C\CCCCCCCC(=O)O[C@H](COC(=O)CCCCCCC/C=C\C/C=C\CCCCC)COP(=O)(O)OCCN	0.745438	0.643609	0.722076	3.42553e-08	0.00277821	0.000324562	IMPC_CBC_017_001___1 point	Clinical Chemistry	Triglycerides	IMPC_CBC_017_001	20	20	20	20	significant	Different size	IMPC_CBC_017_001	_0057_267
45517	ONLI_0559	CSHNEG	Phosphatidylethanolamines	PE 36:2; PE 18:0-18:2;	YDTWOEYVDRKKCR-KNERPIHHSA-N	9546749	CCCCCCCCCCCCCCCCCC(=O)OC[C@H](COP(=O)(O)OCCN)OC(=O)CCCCCCC/C=C\C/C=C\CCCCC	0.764389	0.654135	0.71305	9.45092e-09	0.00226023	0.000417115	IMPC_CBC_017_001___1 point	Clinical Chemistry	Triglycerides	IMPC_CBC_017_001	20	20	20	20	significant	Different size	IMPC_CBC_017_001	_0057_268
45611	ONLI_0560	CSHNEG	Phosphatidylethanolamines	PE 36:1; PE 18:0-18:1;	JQKOHRZNEOQNJE-DJEJVYNPSA-N	9546742	CCCCCCCCCCCCCCCCCC(=O)OC[C@H](COP(=O)(O)OCCN)OC(=O)CCCCCCC/C=C\CCCCCCCC	0.760073	0.63609	0.624295	1.28026e-08	0.00320512	0.003259	IMPC_CBC_017_001___1 point	Clinical Chemistry	Triglycerides	IMPC_CBC_017_001	20	20	20	20	significant	Different size	IMPC_CBC_017_001	_0057_269
46812	ONLI_0573	CSHNEG	1-(1Z-alkenyl),2-acylglycerophosphoethanolamines	PE18:1e/18-HETE	ANCAYQLYUYMKFT-GZPCIZTNSA-N	134718784	CCCCCCCCCCCCCCCC/C=C\OCC(COP(=O)(O)OCCN)OC(=O)CCC/C=C\C/C=C\C/C=C\C/C=C\CCC(CC)O	0.678362	0.658647	0.522001	1.50863e-06	0.00206409	0.0182335	IMPC_CBC_017_001___1 point	Clinical Chemistry	Triglycerides	IMPC_CBC_017_001	20	20	20	20	significant	Different size	IMPC_CBC_017_001	_0057_274
48016	ONLI_0585	CSHNEG	Phosphatidylcholines	PC 32:2; PC 14:0-18:2;	IWXJKHSPEQSQMD-GMGFYYQASA-N	24778624	CCCCCCCCCCCCCC(=O)OC[C@H](COP(=O)([O-])OCC[N+](C)(C)C)OC(=O)CCCCCCC/C=C\C/C=C\CCCCC	0.670857	0.464662	0.539301	2.16917e-06	0.04054	0.0141304	IMPC_CBC_017_001___1 point	Clinical Chemistry	Triglycerides	IMPC_CBC_017_001	20	20	20	20	significant	Different size	IMPC_CBC_017_001	_0057_282
4838	ONLI_0589	CSHNEG	1-alkyl,2-acylglycero-3-phosphocholines	PC 34:3e; PC 16:1e/18:2;	AXCLECQLCBWNLZ-KZZBVOOISA-N	53481709	CCCCCC/C=C\CCCCCCCCOC[C@H](COP(=O)([O-])OCC[N+](C)(C)C)OC(=O)CCCCCCC/C=C\C/C=C\CCCCC	0.696187	0.583459	0.533283	6.09683e-07	0.00797257	0.0154632	IMPC_CBC_017_001___1 point	Clinical Chemistry	Triglycerides	IMPC_CBC_017_001	20	20	20	20	significant	Different size	IMPC_CBC_017_001	_0057_285
4845	ONLI_0590	CSHNEG	Phosphatidylcholines	PC 33:2; PC 15:0-18:2;	DGBYUHHIADYUMU-UESLNCBNSA-N	24778664	CCCCCCCCCCCCCCC(=O)OC[C@H](COP(=O)([O-])OCC[N+](C)(C)C)OC(=O)CCCCCCC/C=C\C/C=C\CCCCC	0.668981	0.538346	0.576909	2.37151e-06	0.0157066	0.00774311	IMPC_CBC_017_001___1 point	Clinical Chemistry	Triglycerides	IMPC_CBC_017_001	20	20	20	20	significant	Different size	IMPC_CBC_017_001	_0057_286
48917	ONLI_0597	CSHNEG	Phosphatidylinositols	PI 32:1; PI 16:0-16:1;	QAWXBJDYTIBLRK-JEHNQGNYSA-N	52928334	CCCCCCCCCCCCCCCC(=O)OC[C@H](COP(=O)(O)OC1C([C@@H](C(C(C1O)O)O)O)O)OC(=O)CCCCCCC/C=C\CCCCCC	0.697054	0.598039	0.559609	1.6422e-06	0.0128637	0.0102984	IMPC_CBC_017_001___1 point	Clinical Chemistry	Triglycerides	IMPC_CBC_017_001	17	20	20	20	significant	Different size	IMPC_CBC_017_001	_0057_289
49010	ONLI_0598	CSHNEG	Phosphatidylinositols	PI 32:0; PI 16:0-16:0;	IBUKXRINTKQBRQ-CSRWQWPHSA-N	24779556	CCCCCCCCCCCCCCCC(=O)OC[C@H](COP(=O)(O)OC1C([C@@H](C(C(C1O)O)O)O)O)OC(=O)CCCCCCCCCCCCCCC	0.67339	0.58797	0.549831	1.92119e-06	0.00741417	0.0120215	IMPC_CBC_017_001___1 point	Clinical Chemistry	Triglycerides	IMPC_CBC_017_001	20	20	20	20	significant	Different size	IMPC_CBC_017_001	_0057_290
50315	ONLI_0614	CSHNEG	Phosphatidylinositols	PI 34:2; PI 16:0-18:2;	BSNJSZUDOMPYIR-YBCFFXQBSA-N	46891796	CCCCCCCCCCCCCCCC(=O)OC[C@H](COP(=O)(O)OC1C([C@@H](C(C(C1O)O)O)O)O)OC(=O)CCCCCCC/C=C\C/C=C\CCCCC	0.760542	0.685714	0.770967	1.23909e-08	0.00115823	6.92467e-05	IMPC_CBC_017_001___1 point	Clinical Chemistry	Triglycerides	IMPC_CBC_017_001	20	20	20	20	significant	Different size	IMPC_CBC_017_001	_0057_297
50417	ONLI_0615	CSHNEG	Phosphatidylinositols	PI 34:1; PI 16:0-18:1;	PDLAMJKMOKWLAJ-PVPULFMTSA-N	5771758	CCCCCCCCCCCCCCCC(=O)OC[C@H](COP(=O)(O)OC1C([C@@H](C(C(C1O)O)O)O)O)OC(=O)CCCCCCC/C=C\CCCCCCCC	0.756977	0.657143	0.677698	1.5856e-08	0.00212785	0.00102613	IMPC_CBC_017_001___1 point	Clinical Chemistry	Triglycerides	IMPC_CBC_017_001	20	20	20	20	significant	Different size	IMPC_CBC_017_001	_0057_298
50811	ONLI_0620	CSHNEG	Phosphatidylcholines	PC 36:3 a	YBNAKFLXDDROCX-YGRWKTHCSA-N	53478723	CCCCCC/C=C\CCCCCCCCCC(=O)OC[C@H](COP(=O)([O-])OCC[N+](C)(C)C)OC(=O)CCCCCCC/C=C\C/C=C\CCCCC	0.669825	0.478195	0.574652	2.2784e-06	0.0345058	0.0080435	IMPC_CBC_017_001___1 point	Clinical Chemistry	Triglycerides	IMPC_CBC_017_001	20	20	20	20	significant	Different size	IMPC_CBC_017_001	_0057_299
51016	ONLI_0622	CSHNEG	Phosphatidylcholines	PC 36:3; PC 18:1-18:2;	GDWULUGDXGHJIJ-VJHNMZKJSA-N	24778939	CCCCCCCC/C=C\CCCCCCCC(=O)OC[C@H](COP(=O)([O-])OCC[N+](C)(C)C)OC(=O)CCCCCCC/C=C\C/C=C\CCCCC	0.669825	0.478195	0.574652	2.2784e-06	0.0345058	0.0080435	IMPC_CBC_017_001___1 point	Clinical Chemistry	Triglycerides	IMPC_CBC_017_001	20	20	20	20	significant	Different size	IMPC_CBC_017_001	_0057_301
51226	ONLI_0625	CSHNEG	Phosphatidylcholines	PC 36:2; PC 18:0-18:2;	FORFDCPQKJHEBF-VPUSDGANSA-N	6441487	CCCCCCCCCCCCCCCCCC(=O)OC[C@H](COP(=O)([O-])OCC[N+](C)(C)C)OC(=O)CCCCCCC/C=C\C/C=C\CCCCC	0.693466	0.487218	0.696502	7.03014e-07	0.0308957	0.000645594	IMPC_CBC_017_001___1 point	Clinical Chemistry	Triglycerides	IMPC_CBC_017_001	20	20	20	20	significant	Different size	IMPC_CBC_017_001	_0057_303
51319	ONLI_0628	CSHNEG	Phosphatidylinositols	PI 35:2; PI 17:0-18:2;	AJAKJCJJRMUWFW-WNEYDAEMSA-N	52927654	CCCCCCCCCCCCCCCCC(=O)OC[C@H](COP(=O)(O)OC1C([C@@H](C(C(C1O)O)O)O)O)OC(=O)CCCCCCC/C=C\C/C=C\CCCCC	0.705755	0.590977	0.594961	3.64806e-07	0.00706009	0.00565473	IMPC_CBC_017_001___1 point	Clinical Chemistry	Triglycerides	IMPC_CBC_017_001	20	20	20	20	significant	Different size	IMPC_CBC_017_001	_0057_304
52020	ONLI_0638	CSHNEG	Phosphatidylinositols	PI 36:4; PI 16:0-20:4;	VWRYMIZQLPXULA-ZLIQYQLMSA-N	53480053	CCCCCCCCCCCCCCCC(=O)OC[C@H](COP(=O)(O)OC1C([C@@H](C(C(C1O)O)O)O)O)OC(=O)CCCCCC/C=C\C/C=C\C/C=C\C/C=C\CC	0.729021	0.533835	0.722828	9.57888e-08	0.0167341	0.000317711	IMPC_CBC_017_001___1 point	Clinical Chemistry	Triglycerides	IMPC_CBC_017_001	20	20	20	20	significant	Different size	IMPC_CBC_017_001	_0057_307
52422	ONLI_0644	CSHNEG	Phosphatidylinositols	PI 36:2; PI 18:0-18:2;	KZVRAFHIKMDULK-LNVBWDHHSA-N	52928409	CCCCCCCCCCCCCCCCCC(=O)OC[C@H](COP(=O)(O)OC1C([C@@H](C(C(C1O)O)O)O)O)OC(=O)CCCCCCC/C=C\C/C=C\CCCCC	0.750879	0.664662	0.67469	2.39455e-08	0.00182457	0.00110179	IMPC_CBC_017_001___1 point	Clinical Chemistry	Triglycerides	IMPC_CBC_017_001	20	20	20	20	significant	Different size	IMPC_CBC_017_001	_0057_311
52615	ONLI_0646	CSHNEG	Phosphatidylinositols	PI 36:1; PI 18:0-18:1;	YOBFISPJJWPPTK-UDGQDVNKSA-N	13073037	CCCCCCCCCCCCCCCCCC(=O)OCC(COP(=O)(O)OC1[C@@H]([C@H](C([C@H]([C@@H]1O)O)O)O)O)OC(=O)CCCCCCC/C=C/CCCCCCCC	0.709508	0.601504	0.45581	2.96612e-07	0.00592843	0.0434045	IMPC_CBC_017_001___1 point	Clinical Chemistry	Triglycerides	IMPC_CBC_017_001	20	20	20	20	significant	Different size	IMPC_CBC_017_001	_0057_312
59720	ONLI_0765	HILICPOS	Pyridoxals and derivatives	Pyridoxal	RADKZDMFGJYCBB-UHFFFAOYSA-N	1050	CC1=NC=C(C(=C1O)C=O)CO	-0.0969089	0.645113	0.480632	0.551928	0.00269874	0.0319436	IMPC_CBC_017_001___1 point	Clinical Chemistry	Triglycerides	IMPC_CBC_017_001	20	20	20	20	significant	Different size	IMPC_CBC_017_001	_0057_347
6326	ONLI_0821	HILICPOS	Gamma amino acids and derivatives	4-Guanidinobutyric acid	TUHVEAJXIMEOSA-UHFFFAOYSA-N	500	C(CC(=O)O)CN=C(N)N	0.501618	0.654135	0.598721	0.00097541	0.00226023	0.00528424	IMPC_CBC_017_001___1 point	Clinical Chemistry	Triglycerides	IMPC_CBC_017_001	20	20	20	20	significant	Different size	IMPC_CBC_017_001	_0057_363
6187	ONLI_0803	HILICPOS	Hexoses	Galactosamine	MSWZFWKMSRAUBD-GASJEMHNSA-N	24154	C([C@@H]1[C@@H]([C@@H]([C@H](C(O1)O)N)O)O)O	0.827923	0.68522	0.891729	4.38828e-11	0.000855909	9.31678e-08	IMPC_CBC_018_001___1 point	Clinical Chemistry	Glucose	IMPC_CBC_018_001	20	20	20	20	significant	Different size	IMPC_CBC_018_001	_0058_65
6508	ONLI_0848	HILICPOS	Alpha amino acids	DL-2-Methylglutamic acid	QHSCIWIRXWFIGH-UHFFFAOYSA-N	95440	CC(CCC(=O)O)(C(=O)O)N	0.674986	0.519744	0.830075	1.77864e-06	0.0188323	8.92184e-07	IMPC_CBC_018_001___1 point	Clinical Chemistry	Glucose	IMPC_CBC_018_001	20	20	20	20	significant	Different size	IMPC_CBC_018_001	_0058_69
15818	ONLI_0207	CSHPOS	Phosphatidylcholines	PC(18:0/22:6(4Z,7Z,10Z,13Z,16Z,19Z)	FAUYAENFVCNTAL-PFFNLMTBSA-N	24778876	CCCCCCCCCCCCCCCCCC(=O)OC[C@H](COP(=O)([O-])OCC[N+](C)(C)C)OC(=O)CC/C=C\C/C=C\C/C=C\C/C=C\C/C=C\C/C=C\CC	0.404007	0.592669	0.64386	0.0131432	0.00954244	0.00366614	IMPC_DXA_002_001___1 point	Body Composition (DEXA lean/fat)	Fat mass	IMPC_DXA_002_001	20	20	18	19	significant	Different size	IMPC_DXA_002_001	_0062_45
16423	ONLI_0213	CSHPOS	Phosphatidylcholines	PC40:4	FHUAYOMRHXZKHT-JUGJLYODSA-N	53479183	CCCCCCCC/C=C\CCCCCCCCCCCC(=O)OC[C@H](COP(=O)([O-])OCC[N+](C)(C)C)OC(=O)CCCCCCC/C=C\C/C=C\C/C=C\CC	0.580878	0.549303	0.503509	0.000163569	0.0182172	0.0296556	IMPC_DXA_002_001___1 point	Body Composition (DEXA lean/fat)	Fat mass	IMPC_DXA_002_001	20	20	18	19	significant	Different size	IMPC_DXA_002_001	_0062_46
19633	ONLI_0249	CSHPOS	Phosphatidylcholines	PC 16:0-22:6	IESVDEZGAHUQJU-ZLBXKVHBSA-N	6441886	CCCCCCCCCCCCCCCC(=O)OC[C@H](COP(=O)([O-])OCC[N+](C)(C)C)OC(=O)CC/C=C\C/C=C\C/C=C\C/C=C\C/C=C\C/C=C\CC	0.720882	0.545173	0.64386	4.84839e-07	0.0192916	0.00366614	IMPC_DXA_002_001___1 point	Body Composition (DEXA lean/fat)	Fat mass	IMPC_DXA_002_001	20	20	18	19	significant	Different size	IMPC_DXA_002_001	_0062_59
19823	ONLI_0251	CSHPOS	Phosphatidylcholines	PC40:5 A	IJTJDJOOHZVSAC-NDRUHXFFSA-N	53479083	CCCCCCCC/C=C\CCCCCCCCCC(=O)O[C@H](COC(=O)CCCCCC/C=C\C/C=C\C/C=C\C/C=C\CC)COP(=O)([O-])OCC[N+](C)(C)C	0.685792	0.481156	0.568421	2.80929e-06	0.0432243	0.0124753	IMPC_DXA_002_001___1 point	Body Composition (DEXA lean/fat)	Fat mass	IMPC_DXA_002_001	20	20	18	19	significant	Different size	IMPC_DXA_002_001	_0062_60
22326	ONLI_0277	CSHPOS	Phosphatidylcholines	PC38:3	KNNHXKQRTYEWCA-HYYWERRFSA-N	53478919	CCCCCC/C=C\CCCCCCCCCC(=O)O[C@H](COC(=O)CCCCCCCCC/C=C\C/C=C\CCCCC)COP(=O)([O-])OCC[N+](C)(C)C	0.789876	0.707279	0.67193	6.168e-09	0.00102779	0.00214416	IMPC_DXA_002_001___1 point	Body Composition (DEXA lean/fat)	Fat mass	IMPC_DXA_002_001	20	20	18	19	significant	Different size	IMPC_DXA_002_001	_0062_72
25824	ONLI_0317	CSHPOS	Phosphatidylcholines	PC 42:10; PC 20:4-22:6;	APEHGLQXFOZAEF-MHNOHXJZSA-N	52923327	CCCCC/C=C\C/C=C\C/C=C\C/C=C\CCCC(=O)OC[C@H](COP(=O)([O-])OCC[N+](C)(C)C)OC(=O)CC/C=C\C/C=C\C/C=C\C/C=C\C/C=C\C/C=C\CC	0.724201	0.594734	0.729825	4.05051e-07	0.00923275	0.000574995	IMPC_DXA_002_001___1 point	Body Composition (DEXA lean/fat)	Fat mass	IMPC_DXA_002_001	20	20	18	19	significant	Different size	IMPC_DXA_002_001	_0062_85
26132	ONLI_0320	CSHPOS	Phosphatidylcholines	PC36:4 A	NKQPOVROGSWLTO-NVPMBMBWSA-N	52922783	CCCCCCCC/C=C\CCCCCCCC(=O)O[C@H](COC(=O)CCCC/C=C\C/C=C\C/C=C\CCCCC)COP(=O)([O-])OCC[N+](C)(C)C	0.724675	0.580279	0.668421	3.94697e-07	0.0115803	0.00229968	IMPC_DXA_002_001___1 point	Body Composition (DEXA lean/fat)	Fat mass	IMPC_DXA_002_001	20	20	18	19	significant	Different size	IMPC_DXA_002_001	_0062_86
26420	ONLI_0323	CSHPOS	Phosphatidylcholines	PC 36:0; PC 18:0-18:0;	NRJAVPSFFCBXDT-HUESYALOSA-N	94190	CCCCCCCCCCCCCCCCCC(=O)OC[C@H](COP(=O)([O-])OCC[N+](C)(C)C)OC(=O)CCCCCCCCCCCCCCCCC	-0.130994	0.53588	0.510526	0.439643	0.0218917	0.0271916	IMPC_DXA_002_001___1 point	Body Composition (DEXA lean/fat)	Fat mass	IMPC_DXA_002_001	20	20	18	19	significant	Different size	IMPC_DXA_002_001	_0062_87
28328	ONLI_0342	CSHPOS	Phosphatidylcholines	PC34:0	PZNPLUBHRSSFHT-RRHRGVEJSA-N	24778686	CCCCCCCCCCCCCCCCCC(=O)O[C@H](COC(=O)CCCCCCCCCCCCCCC)COP(=O)([O-])OCC[N+](C)(C)C	0.255824	0.500774	0.617544	0.126447	0.034276	0.00580234	IMPC_DXA_002_001___1 point	Body Composition (DEXA lean/fat)	Fat mass	IMPC_DXA_002_001	20	20	18	19	significant	Different size	IMPC_DXA_002_001	_0062_95
33522	ONLI_0397	CSHPOS	Monoalkylglycerophosphocholines	Lyso-PAF C-16	VLBPIWYTPAXCFJ-XMMPIXPASA-N	162126	CCCCCCCCCCCCCCCCOC[C@H](COP(=O)([O-])OCC[N+](C)(C)C)O	0.668603	0.618482	0.470175	6.10091e-06	0.00621736	0.0438809	IMPC_DXA_002_001___1 point	Body Composition (DEXA lean/fat)	Fat mass	IMPC_DXA_002_001	20	20	18	19	significant	Different size	IMPC_DXA_002_001	_0062_113
35419	ONLI_0416	CSHPOS	Phosphatidylcholines	PC34:1	WTJKGGKOPKCXLL-VYOBOKEXSA-N	5497103	CCCCCCCCCCCCCCCC(=O)OC[C@H](COP(=O)([O-])OCC[N+](C)(C)C)OC(=O)CCCCCCC/C=C\CCCCCCCC	0.637307	0.478059	0.531579	2.21758e-05	0.0447859	0.0207625	IMPC_DXA_002_001___1 point	Body Composition (DEXA lean/fat)	Fat mass	IMPC_DXA_002_001	20	20	18	19	significant	Different size	IMPC_DXA_002_001	_0062_119
36523	ONLI_0427	CSHPOS	1-acyl-sn-glycero-3-phosphocholines	LPC 20:3 b	XUDGAAFUMTTZCO-QNEBEIHSSA-N	138300357	CC/C=C\C/C=C\C/C=C\CCCCCCCCCC(=O)OCC(COP(=O)([O-])OCC[N+](C)(C)C)O	0.640507	0.545173	0.614035	1.95625e-05	0.0192916	0.00615134	IMPC_DXA_002_001___1 point	Body Composition (DEXA lean/fat)	Fat mass	IMPC_DXA_002_001	20	20	18	19	significant	Different size	IMPC_DXA_002_001	_0062_123
36624	ONLI_0428	CSHPOS	1-acyl,2-(1Z-alkenyl)-glycerophosphocholines	PCo-40:7 A	XUVCLJCZWPTAIO-OAKHYACESA-N	53479405	CCCCCCCC/C=C\CCCCCC/C=C\OC(COC(=O)CCCCC/C=C\C/C=C\C/C=C\C/C=C\C/C=C\CC)COP(=O)([O-])OCC[N+](C)(C)C	0.757394	0.687661	0.710526	5.75592e-08	0.00161101	0.000927047	IMPC_DXA_002_001___1 point	Body Composition (DEXA lean/fat)	Fat mass	IMPC_DXA_002_001	20	20	18	19	significant	Different size	IMPC_DXA_002_001	_0062_124
36716	ONLI_0429	CSHPOS	Phosphatidylcholines	PC 36:6; PC 18:3-18:3;	XXKFQTJOJZELMD-JICBSJGISA-N	24778990	CC/C=C\C/C=C\C/C=C\CCCCCCCC(=O)OC[C@H](COP(=O)([O-])OCC[N+](C)(C)C)OC(=O)CCCCCCC/C=C\C/C=C\C/C=C\CC	0.722779	0.501807	0.650877	4.37635e-07	0.0338482	0.00322172	IMPC_DXA_002_001___1 point	Body Composition (DEXA lean/fat)	Fat mass	IMPC_DXA_002_001	20	20	18	19	significant	Different size	IMPC_DXA_002_001	_0062_125
38415	ONLI_0448	CSHPOS	Phosphatidylcholines	PC34:4	YWDDIWXKFJEMKF-JTZVLWBESA-N	52922891	CCCCCCCCCCCCCCCC(=O)O[C@H](COC(=O)CCCC/C=C\C/C=C\C/C=C\C/C=C\CC)COP(=O)([O-])OCC[N+](C)(C)C	0.698832	0.491482	0.550877	1.50537e-06	0.0383168	0.0159996	IMPC_DXA_002_001___1 point	Body Composition (DEXA lean/fat)	Fat mass	IMPC_DXA_002_001	20	20	18	19	significant	Different size	IMPC_DXA_002_001	_0062_134
52521	ONLI_0645	CSHNEG	Phosphatidylcholines	PC 38:7; PC 16:1-22:6;	DLRNZUPJXRVWRW-FKZZUUMNSA-N	24778773	CCCCCC/C=C\CCCCCCCC(=O)OC[C@H](COP(=O)([O-])OCC[N+](C)(C)C)OC(=O)CC/C=C\C/C=C\C/C=C\C/C=C\C/C=C\C/C=C\CC	0.699662	0.484254	0.52807	1.44518e-06	0.0417044	0.0217395	IMPC_DXA_002_001___1 point	Body Composition (DEXA lean/fat)	Fat mass	IMPC_DXA_002_001	20	20	18	19	significant	Different size	IMPC_DXA_002_001	_0062_182
53523	ONLI_0657	CSHNEG	Phosphatidylcholines	PC 38:3	QXDDDGCNWRUEFM-UMKMFDOBSA-N	24778855	CCCCCCCCCCCCCCCCCC(=O)OC[C@H](COP(=O)([O-])OCC[N+](C)(C)C)OC(=O)CCC/C=C\C/C=C\C/C=C\CCCCCCCC	0.687096	0.482189	0.570175	2.64317e-06	0.042713	0.0121607	IMPC_DXA_002_001___1 point	Body Composition (DEXA lean/fat)	Fat mass	IMPC_DXA_002_001	20	20	18	19	significant	Different size	IMPC_DXA_002_001	_0062_186
53624	ONLI_0658	CSHNEG	Phosphatidylcholines	PC 38:3; PC 18:0-20:3;	VGSUMLIRUGDCTF-NSMRCOLJSA-N	24778857	CCCCCCCCCCCCCCCCCC(=O)OC[C@H](COP(=O)([O-])OCC[N+](C)(C)C)OC(=O)CCCCCC/C=C\C/C=C\C/C=C\CCCCC	0.698595	0.530718	0.570175	1.52299e-06	0.0234505	0.0121607	IMPC_DXA_002_001___1 point	Body Composition (DEXA lean/fat)	Fat mass	IMPC_DXA_002_001	20	20	18	19	significant	Different size	IMPC_DXA_002_001	_0062_187
54916	ONLI_0673	CSHNEG	Phosphatidylcholines	PC 40:6	FYVNIFOYDIIODX-KNKJIUSSSA-N	24778900	CCCCCC/C=C\CCCCCCCCCC(=O)OC[C@H](COP(=O)([O-])OCC[N+](C)(C)C)OC(=O)CCCCC/C=C\C/C=C\C/C=C\C/C=C\C/C=C\CC	0.234959	0.486319	0.489474	0.161563	0.0407141	0.0351142	IMPC_DXA_002_001___1 point	Body Composition (DEXA lean/fat)	Fat mass	IMPC_DXA_002_001	20	20	18	19	significant	Different size	IMPC_DXA_002_001	_0062_196
77014	ONLI_1147	Oxylipins	Hydroxyeicosatrienoic acids	5,6-DiHETrE	GFNYAPAJUNPMGH-QNEBEIHSSA-N	5283142	CCCCC/C=C\C/C=C\C/C=C\CC(C(CCCC(=O)O)O)O	0.00219337	0.468492	0.681878	0.98972	0.049881	0.00130166	IMPC_DXA_002_001___1 point	Body Composition (DEXA lean/fat)	Fat mass	IMPC_DXA_002_001	20	20	18	19	significant	Different size	IMPC_DXA_002_001	_0062_234
28615	ONLI_0345	CSHPOS	Triacylglycerols	SMd34:0	ANBFFIILUQJIQL-XFGXVVNZSA-N	9544103	CCCCCCCCCCCCCCCCC(=O)OC[C@H](COC(=O)CCCCCCC/C=C\CCCCCCCC)OC(=O)CCCCCCC/C=C\CCCCCCCC	0.244325	0.582344	0.507018	0.14502	0.0112184	0.0284023	IMPC_DXA_003_001___1 point	Body Composition (DEXA lean/fat)	Lean mass	IMPC_DXA_003_001	20	20	18	19	significant	Different size	IMPC_DXA_003_001	_0063_106
55136	ONLI_0675	CSHNEG	Phosphatidylcholines	PC 40:4	UAVRPIXHIHJERN-CBTSKTMBSA-N	24779048	CCCCCCCCCCCCCCCCCCCC(=O)OC[C@H](COP(=O)([O-])OCC[N+](C)(C)C)OC(=O)CCC/C=C\C/C=C\C/C=C\C/C=C\CCCCC	0.863256	0.556531	0.505263	6.23555e-12	0.0164509	0.0290236	IMPC_DXA_003_001___1 point	Body Composition (DEXA lean/fat)	Lean mass	IMPC_DXA_003_001	20	20	18	19	significant	Different size	IMPC_DXA_003_001	_0063_216
76422	ONLI_1141	Oxylipins	Lineolic acids and derivatives	15,16-DiHODE	LKLLJYJTYPVCID-OHPMOLHNSA-N	16061068	CCC(C(C/C=C\C/C=C\CCCCCCCC(=O)O)O)O	0.36951	0.54001	0.614035	0.0243969	0.0207042	0.00615134	IMPC_DXA_003_001___1 point	Body Composition (DEXA lean/fat)	Lean mass	IMPC_DXA_003_001	20	20	18	19	significant	Different size	IMPC_DXA_003_001	_0063_264
76619	ONLI_1143	Oxylipins	Lineolic acids and derivatives	9,10-DiHODE	QRHSEDZBZMZPOA-ZJSQCTGTSA-N	16061066	CC/C=C\C/C=C\CC(C(CCCCCCCC(=O)O)O)O	0.232156	0.55062	0.476525	0.166771	0.0178847	0.0391423	IMPC_DXA_003_001___1 point	Body Composition (DEXA lean/fat)	Lean mass	IMPC_DXA_003_001	20	20	18	19	significant	Different size	IMPC_DXA_003_001	_0063_266
79715	ONLI_1182	Oxylipins	Long-chain fatty acids	15,16-EpODE	HKSDVVJONLXYKL-OHPMOLHNSA-N	16061062	CCC1C(O1)C/C=C\C/C=C\CCCCCCCC(=O)O	0.195258	0.554466	0.492982	0.24681	0.0169411	0.0336806	IMPC_DXA_003_001___1 point	Body Composition (DEXA lean/fat)	Lean mass	IMPC_DXA_003_001	20	20	18	19	significant	Different size	IMPC_DXA_003_001	_0063_270
3576	ONLI_0419	CSHPOS	Triacylglycerols	TAG 58:11; TAG 18:2-18:3-22:6;	CCWQXSQVMPACON-RXTLCQEBSA-N	131763405	CCCCC/C=C\C/C=C\CCCCCCCC(=O)OC[C@@H](COC(=O)CC/C=C\C/C=C\C/C=C\C/C=C\C/C=C\C/C=C\CC)OC(=O)CCCCCCC/C=C\C/C=C\C/C=C\CC	0.490595	0.526156	0.559017	0.00205105	0.024899	0.0128394	IMPC_DXA_004_001___1 point	Body Composition (DEXA lean/fat)	Bone Mineral Density (excluding skull)	IMPC_DXA_004_001	20	20	18	19	significant	Different size	IMPC_DXA_004_001	_0064_62
36430	ONLI_0426	CSHPOS	1,2-diacylglycerols	DAG 38:6; DAG 18:2-20:4;	XQKXAZZSUMABAU-HKOSRXLCSA-N	53478108	CCCCC/C=C\C/C=C\CCCCCCCC(=O)OC[C@H](CO)OC(=O)CCCCCC/C=C\C/C=C\C/C=C\C/C=C\CC	0.683558	0.659766	0.750329	3.11628e-06	0.0028902	0.000215214	IMPC_DXA_004_001___1 point	Body Composition (DEXA lean/fat)	Bone Mineral Density (excluding skull)	IMPC_DXA_004_001	20	20	18	19	significant	Different size	IMPC_DXA_004_001	_0064_67
11016	ONLI_0156	CSHPOS	Triacylglycerols	TAG 56:10; TAG 18:2-18:3-20:5;	CEGFLXYMGPCHEY-MOSCTQMVSA-N	131763301	CCCCC/C=C\C/C=C\CCCCCCCC(=O)OC[C@@H](COC(=O)CCC/C=C\C/C=C\C/C=C\C/C=C\C/C=C\CC)OC(=O)CCCC/C=C\C/C=C\C/C=C\CCCCC	0.521574	0.517028	0.498246	0.00109339	0.0298607	0.0316174	IMPC_DXA_005_001___1 point	Body Composition (DEXA lean/fat)	Bone Mineral Content (excluding skull)	IMPC_DXA_005_001	20	20	18	19	significant	Different size	IMPC_DXA_005_001	_0065_14
28616	ONLI_0345	CSHPOS	Triacylglycerols	SMd34:0	ANBFFIILUQJIQL-XFGXVVNZSA-N	9544103	CCCCCCCCCCCCCCCCC(=O)OC[C@H](COC(=O)CCCCCCC/C=C\CCCCCCCC)OC(=O)CCCCCCC/C=C\CCCCCCCC	0.444761	0.603715	0.484211	0.00624818	0.00928909	0.0373544	IMPC_DXA_005_001___1 point	Body Composition (DEXA lean/fat)	Bone Mineral Content (excluding skull)	IMPC_DXA_005_001	20	20	18	19	significant	Different size	IMPC_DXA_005_001	_0065_73
3577	ONLI_0419	CSHPOS	Triacylglycerols	TAG 58:11; TAG 18:2-18:3-22:6;	CCWQXSQVMPACON-RXTLCQEBSA-N	131763405	CCCCC/C=C\C/C=C\CCCCCCCC(=O)OC[C@@H](COC(=O)CC/C=C\C/C=C\C/C=C\C/C=C\C/C=C\C/C=C\CC)OC(=O)CCCCCCC/C=C\C/C=C\C/C=C\CC	0.461593	0.53354	0.507018	0.00439825	0.0243928	0.0284023	IMPC_DXA_005_001___1 point	Body Composition (DEXA lean/fat)	Bone Mineral Content (excluding skull)	IMPC_DXA_005_001	20	20	18	19	significant	Different size	IMPC_DXA_005_001	_0065_100
36431	ONLI_0426	CSHPOS	1,2-diacylglycerols	DAG 38:6; DAG 18:2-20:4;	XQKXAZZSUMABAU-HKOSRXLCSA-N	53478108	CCCCC/C=C\C/C=C\CCCCCCCC(=O)OC[C@H](CO)OC(=O)CCCCCC/C=C\C/C=C\C/C=C\C/C=C\CC	0.692745	0.537668	0.689474	4.12479e-06	0.0231587	0.0014891	IMPC_DXA_005_001___1 point	Body Composition (DEXA lean/fat)	Bone Mineral Content (excluding skull)	IMPC_DXA_005_001	20	20	18	19	significant	Different size	IMPC_DXA_005_001	_0065_104
44713	ONLI_0549	CSHNEG	Ceramides	Cer-NS d43:1; Cer-NS d19:1/24:0;	KSYIVRBEJSMJMX-PVNBSDFKSA-N	134745021	CCCCCCCCCCCCCCCCCCCCCCCC(=O)N[C@@H](CO)[C@@H](/C=C/CCCCCCCCCCCCCC)O	0.298009	0.581011	0.6	0.073549	0.0129578	0.0077233	IMPC_DXA_005_001___1 point	Body Composition (DEXA lean/fat)	Bone Mineral Content (excluding skull)	IMPC_DXA_005_001	20	20	18	19	significant	Different size	IMPC_DXA_005_001	_0065_133
49230	ONLI_0600	CSHNEG	Phosphatidylcholines	PC 34:3	CNNSEHUKQJCGTE-UPPWDXJYSA-N	24778699	CCCCCCCCCCCCCCCC(=O)OC[C@H](COP(=O)([O-])OCC[N+](C)(C)C)OC(=O)CCCC/C=C\C/C=C\C/C=C\CCCCC	0.542911	0.564499	0.521053	0.000627952	0.0162956	0.023804	IMPC_DXA_005_001___1 point	Body Composition (DEXA lean/fat)	Bone Mineral Content (excluding skull)	IMPC_DXA_005_001	20	20	18	19	significant	Different size	IMPC_DXA_005_001	_0065_157
20324	ONLI_0257	CSHPOS	Cholesteryl esters	CE ( 22:4)	ITGTXSFLBABXQA-BMURBKCOSA-N	16061341	CCCCC/C=C\C/C=C\C/C=C\C/C=C\CCCCCC(=O)O[C@H]1CC[C@@]2([C@H]3CC[C@]4([C@H]([C@@H]3CC=C2C1)CC[C@@H]4[C@H](C)CCCC(C)C)C)C	-0.389637	-0.514463	-0.513834	0.0171355	0.0289312	0.0244213	IMPC_DXA_007_001___1 point	Body Composition (DEXA lean/fat)	BMC/Body weight	IMPC_DXA_007_001	20	20	18	19	significant	Different size	IMPC_DXA_007_001	_0067_53
28727	ONLI_0346	CSHPOS	Phosphatidylcholines	PC 32:1; PC 16:0-16:1;	QIBZFHLFHCIUOT-NPBIGWJUSA-N	6443788	CCCCCCCCCCCCCCCC(=O)OC[C@H](COP(=O)([O-])OCC[N+](C)(C)C)OC(=O)CCCCCCC/C=C\CCCCCC	-0.748918	-0.527893	-0.472552	9.74621e-08	0.0243394	0.0410428	IMPC_DXA_007_001___1 point	Body Composition (DEXA lean/fat)	BMC/Body weight	IMPC_DXA_007_001	20	20	18	19	significant	Different size	IMPC_DXA_007_001	_0067_83
36524	ONLI_0427	CSHPOS	1-acyl-sn-glycero-3-phosphocholines	LPC 20:3 b	XUDGAAFUMTTZCO-QNEBEIHSSA-N	138300357	CC/C=C\C/C=C\C/C=C\CCCCCCCCCC(=O)OCC(COP(=O)([O-])OCC[N+](C)(C)C)O	-0.576273	-0.475207	-0.476065	0.00018949	0.0462614	0.0393585	IMPC_DXA_007_001___1 point	Body Composition (DEXA lean/fat)	BMC/Body weight	IMPC_DXA_007_001	20	20	18	19	significant	Different size	IMPC_DXA_007_001	_0067_111
36627	ONLI_0428	CSHPOS	1-acyl,2-(1Z-alkenyl)-glycerophosphocholines	PCo-40:7 A	XUVCLJCZWPTAIO-OAKHYACESA-N	53479405	CCCCCCCC/C=C\CCCCCC/C=C\OC(COC(=O)CCCCC/C=C\C/C=C\C/C=C\C/C=C\C/C=C\CC)COP(=O)([O-])OCC[N+](C)(C)C	-0.780222	-0.639463	-0.46816	1.24554e-08	0.00426956	0.0432255	IMPC_DXA_007_001___1 point	Body Composition (DEXA lean/fat)	BMC/Body weight	IMPC_DXA_007_001	20	20	18	19	significant	Different size	IMPC_DXA_007_001	_0067_112
55523	ONLI_0680	CSHNEG	Phosphatidylinositols	PI 40:5; PI 18:0-22:5;	QLABQLNIHHHJCI-FCGLMCRWSA-N	53480067	CCCCCCCCCCCCCCCCCC(=O)OC[C@H](COP(=O)(O)OC1C([C@@H](C(C(C1O)O)O)O)O)OC(=O)CCCCC/C=C\C/C=C\C/C=C\C/C=C\C/C=C\CC	-0.77453	-0.507232	-0.486606	1.85461e-08	0.0316675	0.0346238	IMPC_DXA_007_001___1 point	Body Composition (DEXA lean/fat)	BMC/Body weight	IMPC_DXA_007_001	20	20	18	19	significant	Different size	IMPC_DXA_007_001	_0067_167
859	ONLI_0101	gctof	Catechols	catechol	YCIMNLLNPGFGHC-UHFFFAOYSA-N	289	C1=CC=C(C(=C1)O)O	0.452492	0.54414	0.468421	0.00492467	0.0195679	0.0447556	IMPC_DXA_008_001___1 point	Body Composition (DEXA lean/fat)	Lean/Body weight	IMPC_DXA_008_001	20	20	18	19	significant	Different size	IMPC_DXA_008_001	_0068_13
13124	ONLI_0179	CSHPOS	Phosphatidylcholines	PC40:7 A	BPUROMFCPFGBOT-ZEGPSQTJSA-N	24778982	CCCCC/C=C\C/C=C\CCCCCCCC(=O)OC[C@H](COP(=O)([O-])OCC[N+](C)(C)C)OC(=O)CC/C=C\C/C=C\C/C=C\C/C=C\C/C=C\CCCCC	-0.360145	-0.728962	-0.573684	0.0285571	0.000599204	0.0115508	IMPC_DXA_008_001___1 point	Body Composition (DEXA lean/fat)	Lean/Body weight	IMPC_DXA_008_001	20	20	18	19	significant	Different size	IMPC_DXA_008_001	_0068_20
17614	ONLI_0227	CSHPOS	1-acyl-sn-glycero-3-phosphocholines	LPC 20:4	GOMVPVRDBLLHQC-VEJNOCSESA-N	53480469	CC/C=C\C/C=C\C/C=C\C/C=C\CCCCCCC(=O)OC[C@H](COP(=O)([O-])OCC[N+](C)(C)C)O	-0.467311	-0.518327	-0.682456	0.0035442	0.0275463	0.00172809	IMPC_DXA_008_001___1 point	Body Composition (DEXA lean/fat)	Lean/Body weight	IMPC_DXA_008_001	20	20	18	19	significant	Different size	IMPC_DXA_008_001	_0068_30
19912	ONLI_0252	CSHPOS	Cholesteryl esters	CE (20:4)	IMXSFYNMSOULQS-BEDFLICRSA-N	6479222	CCCCC/C=C\C/C=C\C/C=C\C/C=C\CCCC(=O)O[C@H]1CC[C@@]2([C@H]3CC[C@]4([C@H]([C@@H]3CC=C2C1)CC[C@@H]4[C@H](C)CCCC(C)C)C)C	-0.6085	-0.473929	-0.754386	6.45012e-05	0.0469345	0.00028885	IMPC_DXA_008_001___1 point	Body Composition (DEXA lean/fat)	Lean/Body weight	IMPC_DXA_008_001	20	20	18	19	significant	Different size	IMPC_DXA_008_001	_0068_37
25827	ONLI_0317	CSHPOS	Phosphatidylcholines	PC 42:10; PC 20:4-22:6;	APEHGLQXFOZAEF-MHNOHXJZSA-N	52923327	CCCCC/C=C\C/C=C\C/C=C\C/C=C\CCCC(=O)OC[C@H](COP(=O)([O-])OCC[N+](C)(C)C)OC(=O)CC/C=C\C/C=C\C/C=C\C/C=C\C/C=C\C/C=C\CC	-0.172485	-0.627775	-0.559649	0.307324	0.00528104	0.0141488	IMPC_DXA_008_001___1 point	Body Composition (DEXA lean/fat)	Lean/Body weight	IMPC_DXA_008_001	20	20	18	19	significant	Different size	IMPC_DXA_008_001	_0068_53
31722	ONLI_0379	CSHPOS	Phosphatidylcholines	PC38:5 A	SUACBSWYGWBPFC-GPUJSUHJSA-N	52923235	CCCCC/C=C\C/C=C\CCCCCCCC(=O)O[C@H](COC(=O)CCCCCC/C=C\C/C=C\C/C=C\CCCCC)COP(=O)([O-])OCC[N+](C)(C)C	-0.397605	-0.659783	-0.585965	0.014812	0.00288922	0.00960858	IMPC_DXA_008_001___1 point	Body Composition (DEXA lean/fat)	Lean/Body weight	IMPC_DXA_008_001	20	20	18	19	significant	Different size	IMPC_DXA_008_001	_0068_69
33714	ONLI_0399	CSHPOS	Cholesteryl esters	CE (22:6)	VOEVEGPMRIYYKC-IWVSHIRDSA-N	53477890	CC/C=C\C/C=C\C/C=C\C/C=C\C/C=C\C/C=C\CCC(=O)O[C@H]1CC[C@@]2(C3CC[C@]4(C(C3CC=C2C1)CCC4[C@H](C)CCCC(C)C)C)C	-0.443483	-0.62158	-0.557895	0.00597364	0.0058914	0.0145044	IMPC_DXA_008_001___1 point	Body Composition (DEXA lean/fat)	Lean/Body weight	IMPC_DXA_008_001	20	20	18	19	significant	Different size	IMPC_DXA_008_001	_0068_73
36718	ONLI_0429	CSHPOS	Phosphatidylcholines	PC 36:6; PC 18:3-18:3;	XXKFQTJOJZELMD-JICBSJGISA-N	24778990	CC/C=C\C/C=C\C/C=C\CCCCCCCC(=O)OC[C@H](COP(=O)([O-])OCC[N+](C)(C)C)OC(=O)CCCCCCC/C=C\C/C=C\C/C=C\CC	-0.338925	-0.619515	-0.636842	0.0401679	0.00610712	0.00415945	IMPC_DXA_008_001___1 point	Body Composition (DEXA lean/fat)	Lean/Body weight	IMPC_DXA_008_001	20	20	18	19	significant	Different size	IMPC_DXA_008_001	_0068_84
38417	ONLI_0448	CSHPOS	Phosphatidylcholines	PC34:4	YWDDIWXKFJEMKF-JTZVLWBESA-N	52922891	CCCCCCCCCCCCCCCC(=O)O[C@H](COC(=O)CCCC/C=C\C/C=C\C/C=C\C/C=C\CC)COP(=O)([O-])OCC[N+](C)(C)C	-0.328256	-0.547238	-0.492982	0.04731	0.0187483	0.0336806	IMPC_DXA_008_001___1 point	Body Composition (DEXA lean/fat)	Lean/Body weight	IMPC_DXA_008_001	20	20	18	19	significant	Different size	IMPC_DXA_008_001	_0068_87
43216	ONLI_0529	CSHNEG	1-acyl-sn-glycerol-3-phosphoinositols	LPI 20:4	LXUGKKVCSTYZFK-YPTWYXPQSA-N	42607497	CCCCC/C=C\C/C=C\C/C=C\C/C=C\CCCC(=O)OC[C@H](COP(=O)(O)OC1C([C@@H](C(C(C1O)O)O)O)O)O	-0.489953	-0.50284	-0.508772	0.0020833	0.0334244	0.0277917	IMPC_DXA_008_001___1 point	Body Composition (DEXA lean/fat)	Lean/Body weight	IMPC_DXA_008_001	20	20	18	19	significant	Different size	IMPC_DXA_008_001	_0068_95
50716	ONLI_0619	CSHNEG	Sphingomyelins	SM d40:3; SM d14:1/26:2;	FMJPKVXVBYILLP-FTRJIJDXSA-N	52931199	CCCCCCCC/C=C\CCCCCCCCCCCC(=O)N[C@@H](COP(=O)([O-])OCC[N+](C)(C)C)[C@@H](/C=C/CCCCCCCC/C=C\CCC)O	-0.252149	-0.645328	-0.770175	0.132179	0.00382519	0.000173456	IMPC_DXA_008_001___1 point	Body Composition (DEXA lean/fat)	Lean/Body weight	IMPC_DXA_008_001	20	20	18	19	significant	Different size	IMPC_DXA_008_001	_0068_111
53018	ONLI_0651	CSHNEG	Phosphatidylcholines	PC 38:5; PC 18:1-20:4;	SWOKEJBWARJLGN-ORKYUJCWSA-N	53478767	CCCCCCCC/C=C\CCCCCCCC(=O)OC[C@H](COP(=O)([O-])OCC[N+](C)(C)C)OC(=O)CCCCCC/C=C\C/C=C\C/C=C\C/C=C\CC	-0.535949	-0.60919	-0.745614	0.000628999	0.00728395	0.000373971	IMPC_DXA_008_001___1 point	Body Composition (DEXA lean/fat)	Lean/Body weight	IMPC_DXA_008_001	20	20	18	19	significant	Different size	IMPC_DXA_008_001	_0068_114
54823	ONLI_0672	CSHNEG	Phosphatidylcholines	PC 40:7; PC 18:1-22:6;	FPEVDFOXMCHLKL-KFDYCXSYSA-N	24778955	CCCCCCCC/C=C\CCCCCCCC(=O)OC[C@H](COP(=O)([O-])OCC[N+](C)(C)C)OC(=O)CC/C=C\C/C=C\C/C=C\C/C=C\C/C=C\C/C=C\CC	-0.425345	-0.702117	-0.515789	0.00867953	0.00116073	0.0254528	IMPC_DXA_008_001___1 point	Body Composition (DEXA lean/fat)	Lean/Body weight	IMPC_DXA_008_001	20	20	18	19	significant	Different size	IMPC_DXA_008_001	_0068_124
55524	ONLI_0680	CSHNEG	Phosphatidylinositols	PI 40:5; PI 18:0-22:5;	QLABQLNIHHHJCI-FCGLMCRWSA-N	53480067	CCCCCCCCCCCCCCCCCC(=O)OC[C@H](COP(=O)(O)OC1C([C@@H](C(C(C1O)O)O)O)O)OC(=O)CCCCC/C=C\C/C=C\C/C=C\C/C=C\C/C=C\CC	-0.188608	-0.644295	-0.529825	0.263589	0.00390056	0.0212465	IMPC_DXA_008_001___1 point	Body Composition (DEXA lean/fat)	Lean/Body weight	IMPC_DXA_008_001	20	20	18	19	significant	Different size	IMPC_DXA_008_001	_0068_127
76224	ONLI_1139	Oxylipins	Long-chain fatty acids	12_13-DiHOME	CQSLTKIXAJTQGA-FLIBITNWSA-N	10236635	CCCCCC(C(C/C=C\CCCCCCCC(=O)O)O)O	0.557084	0.608157	0.492982	0.000341855	0.00741106	0.0336806	IMPC_DXA_008_001___1 point	Body Composition (DEXA lean/fat)	Lean/Body weight	IMPC_DXA_008_001	20	20	18	19	significant	Different size	IMPC_DXA_008_001	_0068_158
12128	ONLI_0168	CSHPOS	Phosphatidylcholines	PC36:1	ATHVAWFAEPLPPQ-VRDBWYNSSA-N	24778825	CCCCCCCCCCCCCCCCCC(=O)OC[C@H](COP(=O)([O-])OCC[N+](C)(C)C)OC(=O)CCCCCCC/C=C\CCCCCCCC	0.448462	0.477026	0.475439	0.0053724	0.0453159	0.0413366	IMPC_DXA_009_001___1 point	Body Composition (DEXA lean/fat)	Fat/Body weight	IMPC_DXA_009_001	20	20	18	19	significant	Different size	IMPC_DXA_009_001	_0069_27
15821	ONLI_0207	CSHPOS	Phosphatidylcholines	PC(18:0/22:6(4Z,7Z,10Z,13Z,16Z,19Z)	FAUYAENFVCNTAL-PFFNLMTBSA-N	24778876	CCCCCCCCCCCCCCCCCC(=O)OC[C@H](COP(=O)([O-])OCC[N+](C)(C)C)OC(=O)CC/C=C\C/C=C\C/C=C\C/C=C\C/C=C\C/C=C\CC	0.488886	0.472896	0.478947	0.00213786	0.0474836	0.0397056	IMPC_DXA_009_001___1 point	Body Composition (DEXA lean/fat)	Fat/Body weight	IMPC_DXA_009_001	20	20	18	19	significant	Different size	IMPC_DXA_009_001	_0069_35
22331	ONLI_0277	CSHPOS	Phosphatidylcholines	PC38:3	KNNHXKQRTYEWCA-HYYWERRFSA-N	53478919	CCCCCC/C=C\CCCCCCCCCC(=O)O[C@H](COC(=O)CCCCCCCCC/C=C\C/C=C\CCCCC)COP(=O)([O-])OCC[N+](C)(C)C	0.590481	0.668043	0.550877	0.000119501	0.00244505	0.0159996	IMPC_DXA_009_001___1 point	Body Composition (DEXA lean/fat)	Fat/Body weight	IMPC_DXA_009_001	20	20	18	19	significant	Different size	IMPC_DXA_009_001	_0069_59
25828	ONLI_0317	CSHPOS	Phosphatidylcholines	PC 42:10; PC 20:4-22:6;	APEHGLQXFOZAEF-MHNOHXJZSA-N	52923327	CCCCC/C=C\C/C=C\C/C=C\C/C=C\CCCC(=O)OC[C@H](COP(=O)([O-])OCC[N+](C)(C)C)OC(=O)CC/C=C\C/C=C\C/C=C\C/C=C\C/C=C\C/C=C\CC	0.443957	0.62571	0.605263	0.00591398	0.00547849	0.00709942	IMPC_DXA_009_001___1 point	Body Composition (DEXA lean/fat)	Fat/Body weight	IMPC_DXA_009_001	20	20	18	19	significant	Different size	IMPC_DXA_009_001	_0069_72
26137	ONLI_0320	CSHPOS	Phosphatidylcholines	PC36:4 A	NKQPOVROGSWLTO-NVPMBMBWSA-N	52922783	CCCCCCCC/C=C\CCCCCCCC(=O)O[C@H](COC(=O)CCCC/C=C\C/C=C\C/C=C\CCCCC)COP(=O)([O-])OCC[N+](C)(C)C	0.49351	0.530718	0.464912	0.00191015	0.0234505	0.046546	IMPC_DXA_009_001___1 point	Body Composition (DEXA lean/fat)	Fat/Body weight	IMPC_DXA_009_001	20	20	18	19	significant	Different size	IMPC_DXA_009_001	_0069_73
36526	ONLI_0427	CSHPOS	1-acyl-sn-glycero-3-phosphocholines	LPC 20:3 b	XUDGAAFUMTTZCO-QNEBEIHSSA-N	138300357	CC/C=C\C/C=C\C/C=C\CCCCCCCCCC(=O)OCC(COP(=O)([O-])OCC[N+](C)(C)C)O	0.573647	0.489417	0.626316	0.00020587	0.0392624	0.00500009	IMPC_DXA_009_001___1 point	Body Composition (DEXA lean/fat)	Fat/Body weight	IMPC_DXA_009_001	20	20	18	19	significant	Different size	IMPC_DXA_009_001	_0069_106
36629	ONLI_0428	CSHPOS	1-acyl,2-(1Z-alkenyl)-glycerophosphocholines	PCo-40:7 A	XUVCLJCZWPTAIO-OAKHYACESA-N	53479405	CCCCCCCC/C=C\CCCCCC/C=C\OC(COC(=O)CCCCC/C=C\C/C=C\C/C=C\C/C=C\C/C=C\CC)COP(=O)([O-])OCC[N+](C)(C)C	0.470749	0.615385	0.514035	0.00327696	0.00655779	0.0260222	IMPC_DXA_009_001___1 point	Body Composition (DEXA lean/fat)	Fat/Body weight	IMPC_DXA_009_001	20	20	18	19	significant	Different size	IMPC_DXA_009_001	_0069_107
36719	ONLI_0429	CSHPOS	Phosphatidylcholines	PC 36:6; PC 18:3-18:3;	XXKFQTJOJZELMD-JICBSJGISA-N	24778990	CC/C=C\C/C=C\C/C=C\CCCCCCCC(=O)OC[C@H](COP(=O)([O-])OCC[N+](C)(C)C)OC(=O)CCCCCCC/C=C\C/C=C\C/C=C\CC	0.55302	0.493547	0.675439	0.000385594	0.0373888	0.00199731	IMPC_DXA_009_001___1 point	Body Composition (DEXA lean/fat)	Fat/Body weight	IMPC_DXA_009_001	20	20	18	19	significant	Different size	IMPC_DXA_009_001	_0069_108
38418	ONLI_0448	CSHPOS	Phosphatidylcholines	PC34:4	YWDDIWXKFJEMKF-JTZVLWBESA-N	52922891	CCCCCCCCCCCCCCCC(=O)O[C@H](COC(=O)CCCC/C=C\C/C=C\C/C=C\C/C=C\CC)COP(=O)([O-])OCC[N+](C)(C)C	0.589295	0.543108	0.601754	0.00012429	0.0198472	0.00751056	IMPC_DXA_009_001___1 point	Body Composition (DEXA lean/fat)	Fat/Body weight	IMPC_DXA_009_001	20	20	18	19	significant	Different size	IMPC_DXA_009_001	_0069_116
45221	ONLI_0555	CSHNEG	Sphingomyelins	SM d32:1; SM d16:1/16:0;	RPTUKVYGSPDHGQ-PSALXKTOSA-N	52931133	CCCCCCCCCCCCCCCC(=O)N[C@@H](COP(=O)([O-])OCC[N+](C)(C)C)[C@@H](/C=C/CCCCCCCCCCC)O	0.304309	0.568921	0.549123	0.0670692	0.0137406	0.0163922	IMPC_DXA_009_001___1 point	Body Composition (DEXA lean/fat)	Fat/Body weight	IMPC_DXA_009_001	20	20	18	19	significant	Different size	IMPC_DXA_009_001	_0069_131
53629	ONLI_0658	CSHNEG	Phosphatidylcholines	PC 38:3; PC 18:0-20:3;	VGSUMLIRUGDCTF-NSMRCOLJSA-N	24778857	CCCCCCCCCCCCCCCCCC(=O)OC[C@H](COP(=O)([O-])OCC[N+](C)(C)C)OC(=O)CCCCCC/C=C\C/C=C\C/C=C\CCCCC	0.537135	0.485287	0.498246	0.000608491	0.041207	0.0316174	IMPC_DXA_009_001___1 point	Body Composition (DEXA lean/fat)	Fat/Body weight	IMPC_DXA_009_001	20	20	18	19	significant	Different size	IMPC_DXA_009_001	_0069_151
77019	ONLI_1147	Oxylipins	Hydroxyeicosatrienoic acids	5,6-DiHETrE	GFNYAPAJUNPMGH-QNEBEIHSSA-N	5283142	CCCCC/C=C\C/C=C\C/C=C\CC(C(CCCC(=O)O)O)O	0.348272	0.49845	0.685388	0.0346537	0.0352543	0.00120062	IMPC_DXA_009_001___1 point	Body Composition (DEXA lean/fat)	Fat/Body weight	IMPC_DXA_009_001	20	20	18	19	significant	Different size	IMPC_DXA_009_001	_0069_184
78417	ONLI_1166	Oxylipins	Hydroxyeicosatetraenoic acids	5-HETE	KGIJOOYOSFUGPC-JGKLHWIESA-N	5280733	CCCCC/C=C\C/C=C\C/C=C\C=C\[C@H](CCCC(=O)O)O	0.576729	0.468766	0.668421	0.000186767	0.049729	0.00229968	IMPC_DXA_009_001___1 point	Body Composition (DEXA lean/fat)	Fat/Body weight	IMPC_DXA_009_001	20	20	18	19	significant	Different size	IMPC_DXA_009_001	_0069_185
21734	ONLI_0271	CSHPOS	Ceramides	Cer d40:1	CJROVRTUSFQVMR-GVOPMEMSSA-N	5283570	CCCCCCCCCCCCCCCCCCCCCCCCCC(=O)N[C@@H](CO)[C@@H](/C=C/CCCCCCCCCCCCC)O	0.528687	0.581011	0.47193	0.000912273	0.0129578	0.0430195	IMPC_DXA_010_001___1 point	Body Composition (DEXA lean/fat)	Bone Area	IMPC_DXA_010_001	20	20	18	19	significant	Different size	IMPC_DXA_010_001	_0070_41
28618	ONLI_0345	CSHPOS	Triacylglycerols	SMd34:0	ANBFFIILUQJIQL-XFGXVVNZSA-N	9544103	CCCCCCCCCCCCCCCCC(=O)OC[C@H](COC(=O)CCCCCCC/C=C\CCCCCCCC)OC(=O)CCCCCCC/C=C\CCCCCCCC	0.518255	0.690402	0.570175	0.00118834	0.00204871	0.0121607	IMPC_DXA_010_001___1 point	Body Composition (DEXA lean/fat)	Bone Area	IMPC_DXA_010_001	20	20	18	19	significant	Different size	IMPC_DXA_010_001	_0070_60
32833	ONLI_0390	CSHPOS	1-acyl-sn-glycero-3-phosphocholines	LPC 22:0	UIINDYGXBHJQHX-GDLZYMKVSA-N	24779479	CCCCCCCCCCCCCCCCCCCCCC(=O)OC[C@H](COP(=O)([O-])OCC[N+](C)(C)C)O	0.586534	0.531476	0.47193	0.000180343	0.0250291	0.0430195	IMPC_DXA_010_001___1 point	Body Composition (DEXA lean/fat)	Bone Area	IMPC_DXA_010_001	20	20	18	19	significant	Different size	IMPC_DXA_010_001	_0070_77
38926	ONLI_0453	CSHPOS	Ceramides	Cer d42:1	ZJVVOYPTFQEGPH-AUTSUKAISA-N	5283571	CCCCCCCCCCCCCCCCCCCCCCCC(=O)N[C@@H](CO)[C@@H](/C=C/CCCCCCCCCCCCC)O	0.674016	0.475748	0.821053	8.58059e-06	0.0477973	1.21192e-05	IMPC_DXA_010_001___1 point	Body Composition (DEXA lean/fat)	Bone Area	IMPC_DXA_010_001	20	20	18	19	significant	Different size	IMPC_DXA_010_001	_0070_95
44717	ONLI_0549	CSHNEG	Ceramides	Cer-NS d43:1; Cer-NS d19:1/24:0;	KSYIVRBEJSMJMX-PVNBSDFKSA-N	134745021	CCCCCCCCCCCCCCCCCCCCCCCC(=O)N[C@@H](CO)[C@@H](/C=C/CCCCCCCCCCCCCC)O	0.294689	0.611971	0.578947	0.0769327	0.00818501	0.0106827	IMPC_DXA_010_001___1 point	Body Composition (DEXA lean/fat)	Bone Area	IMPC_DXA_010_001	20	20	18	19	significant	Different size	IMPC_DXA_010_001	_0070_118
49233	ONLI_0600	CSHNEG	Phosphatidylcholines	PC 34:3	CNNSEHUKQJCGTE-UPPWDXJYSA-N	24778699	CCCCCCCCCCCCCCCC(=O)OC[C@H](COP(=O)([O-])OCC[N+](C)(C)C)OC(=O)CCCC/C=C\C/C=C\C/C=C\CCCCC	0.575154	0.593395	0.585965	0.000253699	0.0108352	0.00960858	IMPC_DXA_010_001___1 point	Body Composition (DEXA lean/fat)	Bone Area	IMPC_DXA_010_001	20	20	18	19	significant	Different size	IMPC_DXA_010_001	_0070_141
51511	ONLI_0631	CSHNEG	Phosphatidylcholines	PC 38:6e; PC 18:2e/20:4;	ZZSZQATYGVHNLZ-PUMLCSCDSA-N	24778979	CCCCC/C=C\C/C=C\CCCCCCCC(=O)OC[C@H](COP(=O)([O-])OCC[N+](C)(C)C)OC(=O)CCC/C=C\C/C=C\C/C=C\C/C=C\CCCCC	0.470931	0.537796	0.448627	0.00216251	0.0144546	0.0472511	IMPC_ECG_001_001___1 point	Electrocardiogram (ECG)	Number of signals	IMPC_ECG_001_001	20	20	20	20	significant	Different size	IMPC_ECG_001_001	_0071_37
7318	ONLI_0087	gctof	Hexoses	glucose	WQZGKKKJIJFFOK-VFUOTHLCSA-N	64689	C([C@@H]1[C@H]([C@@H]([C@H]([C@@H](O1)O)O)O)O)O	0.478532	0.536696	0.534989	0.00178752	0.0146955	0.0150756	IMPC_ECG_002_001___1 point	Electrocardiogram (ECG)	HR	IMPC_ECG_002_001	20	20	20	20	significant	Different size	IMPC_ECG_002_001	_0072_14
999	ONLI_0119	gctof	Beta hydroxy acids and derivatives	3-hydroxybutyric acid	WHBMMWSBFZVSSR-GSVOUGTGSA-N	92135	C[C@H](CC(=O)O)O	0.615738	0.636809	0.637321	2.34662e-05	0.00253346	0.00250688	IMPC_ECG_002_001___1 point	Electrocardiogram (ECG)	HR	IMPC_ECG_002_001	20	20	20	20	significant	Different size	IMPC_ECG_002_001	_0072_22
34410	ONLI_0406	CSHPOS	Triacylglycerols	TAG 58:6; TAG 18:1-18:2-22:3;	WCIIIQSFALPOGU-CIRMXUQZSA-N	138286297	CCCCCC/C=C\CCCCCCCCCC(=O)OCC(COC(=O)CCCCCCCCCCC/C=C\C/C=C\C/C=C\CC)OC(=O)CCCCCCCC/C=C\C=C/CCCCC	0.38013	0.469173	0.464662	0.0155409	0.0384427	0.04054	IMPC_ECG_003_001___1 point	Electrocardiogram (ECG)	CV	IMPC_ECG_003_001	20	20	20	20	significant	Different size	IMPC_ECG_003_001	_0073_40
7323	ONLI_0087	gctof	Hexoses	glucose	WQZGKKKJIJFFOK-VFUOTHLCSA-N	64689	C([C@@H]1[C@H]([C@@H]([C@H]([C@@H](O1)O)O)O)O)O	-0.461192	-0.496801	-0.538346	0.0027429	0.025857	0.0157066	IMPC_ECG_004_001___1 point	Electrocardiogram (ECG)	RR	IMPC_ECG_004_001	20	20	20	20	significant	Different size	IMPC_ECG_004_001	_0074_15
9910	ONLI_0119	gctof	Beta hydroxy acids and derivatives	3-hydroxybutyric acid	WHBMMWSBFZVSSR-GSVOUGTGSA-N	92135	C[C@H](CC(=O)O)O	-0.615204	-0.624765	-0.639098	2.39614e-05	0.00322892	0.0030283	IMPC_ECG_004_001___1 point	Electrocardiogram (ECG)	RR	IMPC_ECG_004_001	20	20	20	20	significant	Different size	IMPC_ECG_004_001	_0074_23
25134	ONLI_0310	CSHPOS	Lineolic acids and derivatives	DAG 36:4; DAG 18:2-18:2;	MQGBAQLIFKSMEM-ZHARMHCNSA-N	9543729	CCCCC/C=C\C/C=C\CCCCCCCC(=O)OC[C@H](CO)OC(=O)CCCCCCC/C=C\C/C=C\CCCCC	-0.437618	-0.445784	-0.445872	0.00474389	0.0488436	0.0487934	IMPC_ECG_005_001___1 point	Electrocardiogram (ECG)	PQ	IMPC_ECG_005_001	20	20	20	20	significant	Different size	IMPC_ECG_005_001	_0075_45
6024	ONLI_0773	HILICPOS	Proline and derivatives	Stachydrine	CMUNUTVVOOHQPW-LURJTMIESA-N	115244	C[N+]1(CCC[C@H]1C(=O)[O-])C	-0.506953	-0.465362	-0.492647	0.000842838	0.0386697	0.0273252	IMPC_ECG_005_001___1 point	Electrocardiogram (ECG)	PQ	IMPC_ECG_005_001	20	20	20	20	significant	Different size	IMPC_ECG_005_001	_0075_92
6026	ONLI_0773	HILICPOS	Proline and derivatives	Stachydrine	CMUNUTVVOOHQPW-LURJTMIESA-N	115244	C[N+]1(CCC[C@H]1C(=O)[O-])C	-0.493363	-0.446617	-0.497932	0.00121722	0.0498458	0.0254685	IMPC_ECG_006_001___1 point	Electrocardiogram (ECG)	PR	IMPC_ECG_006_001	20	20	20	20	significant	Different size	IMPC_ECG_006_001	_0076_90
70519	ONLI_0938	HILICNEG	Medium-chain hydroxy acids and derivatives	6-Hydroxycaproic acid	IWHLYPDWHHPVAA-UHFFFAOYSA-N	14490	C(CCC(=O)O)CCO	-0.528925	-0.483416	-0.64654	0.00155262	0.0493125	0.00680103	IMPC_ECG_009_001___1 point	Electrocardiogram (ECG)	QTc	IMPC_ECG_009_001	20	19	17	16	significant	Different size	IMPC_ECG_009_001	_0079_85
20330	ONLI_0257	CSHPOS	Cholesteryl esters	CE ( 22:4)	ITGTXSFLBABXQA-BMURBKCOSA-N	16061341	CCCCC/C=C\C/C=C\C/C=C\C/C=C\CCCCCC(=O)O[C@H]1CC[C@@]2([C@H]3CC[C@]4([C@H]([C@@H]3CC=C2C1)CC[C@@H]4[C@H](C)CCCC(C)C)C)C	0.494229	0.470102	0.51824	0.00118956	0.0364742	0.0192402	IMPC_ECG_012_001___1 point	Electrocardiogram (ECG)	Mean SR amplitude	IMPC_ECG_012_001	20	20	20	20	significant	Different size	IMPC_ECG_012_001	_0082_19
14715	ONLI_0195	CSHPOS	Alkyldiacylglycerols	TAG 54:0; TAG 16:0-18:0-20:0;	FPBBGJFVHOTVDS-GNFJTHHVSA-N	131755693	CCCCCCCCCCCCCCCCCCCC(=O)OC[C@H](COC(=O)CCCCCCCCCCCCCCC)OCCCCCCCCCCCCCCCCCC	0.533052	0.528969	0.566917	0.00039809	0.0164794	0.0103238	IMPC_ECG_013_001___1 point	Electrocardiogram (ECG)	Mean R amplitude	IMPC_ECG_013_001	20	20	20	20	significant	Different size	IMPC_ECG_013_001	_0083_14
17116	ONLI_0222	CSHPOS	Cholesteryl esters	CE (18:3)	FYMCIBHUFSIWCE-KNWYFNKZSA-N	131801659	CC/C=C\C/C=C\C/C=C\CCCCCCCC(=O)O[C@H]1CC[C@@]2(C3CC[C@]4(C(C3CC=C2C1)CCC4[C@H](C)CCCC(C)C)C)C	0.567675	0.670429	0.482707	0.000133302	0.00121693	0.0326611	IMPC_ECG_013_001___1 point	Electrocardiogram (ECG)	Mean R amplitude	IMPC_ECG_013_001	20	20	20	20	significant	Different size	IMPC_ECG_013_001	_0083_17
20331	ONLI_0257	CSHPOS	Cholesteryl esters	CE ( 22:4)	ITGTXSFLBABXQA-BMURBKCOSA-N	16061341	CCCCC/C=C\C/C=C\C/C=C\C/C=C\CCCCCC(=O)O[C@H]1CC[C@@]2([C@H]3CC[C@]4([C@H]([C@@H]3CC=C2C1)CC[C@@H]4[C@H](C)CCCC(C)C)C)C	0.579123	0.58164	0.571429	9.03328e-05	0.00714292	0.0096326	IMPC_ECG_013_001___1 point	Electrocardiogram (ECG)	Mean R amplitude	IMPC_ECG_013_001	20	20	20	20	significant	Different size	IMPC_ECG_013_001	_0083_21
24418	ONLI_0301	CSHPOS	Triacylglycerols	TAG 52:3; TAG 16:0-18:0-18:3;	QRLNWUKVSNTXQG-VWMLCLGZSA-N	131755026	CCCCCCCCCCCCCCCCCC(=O)O[C@@H](COC(=O)CCCCCCCCCCCCCCC)COC(=O)CCCCCCC/C=C\C/C=C\C/C=C\CC	0.536993	0.510911	0.533835	0.000353567	0.0213295	0.0167341	IMPC_ECG_013_001___1 point	Electrocardiogram (ECG)	Mean R amplitude	IMPC_ECG_013_001	20	20	20	20	significant	Different size	IMPC_ECG_013_001	_0083_31
8515	ONLI_0101	gctof	Catechols	catechol	YCIMNLLNPGFGHC-UHFFFAOYSA-N	289	C1=CC=C(C(=C1)O)O	0.554949	0.533016	0.603945	0.00178092	0.033506	0.0288236	IMPC_ECG_015_001___1 point	Electrocardiogram (ECG)	pNN5(6>ms)	IMPC_ECG_015_001	20	20	16	13	significant	Different size	IMPC_ECG_015_001	_0085_12
11118	ONLI_0157	CSHPOS	Triacylglycerols	TAG 58:7; TAG 18:1-18:1-22:5;	AANCKINPVVQDGX-OSUITXOZSA-N	131760076	CCCCCC/C=C\CCCCCCCCCC(=O)OC[C@@H](COC(=O)CCCCC/C=C\C/C=C\C/C=C\C/C=C\C/C=C\CC)OC(=O)CCCCCCCCC/C=C\CCCCCC	0.581266	0.667403	0.612614	0.000943752	0.00473279	0.0260192	IMPC_ECG_015_001___1 point	Electrocardiogram (ECG)	pNN5(6>ms)	IMPC_ECG_015_001	20	20	16	13	significant	Different size	IMPC_ECG_015_001	_0085_21
14117	ONLI_0189	CSHPOS	Triacylglycerols	TAG 54:3; TAG 16:0-18:0-20:3;	CICXNKCKBFXJSH-LZWIKYMTSA-N	131755017	CCCCCCCCCCCCCCCCCC(=O)O[C@@H](COC(=O)CCCCCCCCCCCCCCC)COC(=O)CCC/C=C\C/C=C\C/C=C\CCCCCCCC	0.578456	0.546606	0.606835	0.00101255	0.0284587	0.0278653	IMPC_ECG_015_001___1 point	Electrocardiogram (ECG)	pNN5(6>ms)	IMPC_ECG_015_001	20	20	16	13	significant	Different size	IMPC_ECG_015_001	_0085_30
15010	ONLI_0198	CSHPOS	Triacylglycerols	TAG 56:7; TAG 16:0-18:1-22:6;	DNTWVXNMAFTXDU-RVFBAGKZSA-N	131755186	CCCCCCCCCCCCCCCC(=O)OC[C@@H](COC(=O)CC/C=C\C/C=C\C/C=C\C/C=C\C/C=C\C/C=C\CC)OC(=O)CCCCCCCCC/C=C\CCCCCC	0.724091	0.730821	0.722423	8.98711e-06	0.00130025	0.00528467	IMPC_ECG_015_001___1 point	Electrocardiogram (ECG)	pNN5(6>ms)	IMPC_ECG_015_001	20	20	16	13	significant	Different size	IMPC_ECG_015_001	_0085_36
15918	ONLI_0208	CSHPOS	Triacylglycerols	TAG 46:2; TAG 12:0-16:0-18:2;	0	NA	0	0.637194	0.735867	0.641511	0.000265853	0.00176395	0.0181106	IMPC_ECG_015_001___1 point	Electrocardiogram (ECG)	pNN5(6>ms)	IMPC_ECG_015_001	19	20	16	13	significant	Different size	IMPC_ECG_015_001	_0085_43
17423	ONLI_0225	CSHPOS	Phosphatidylethanolamines	PE 36:3; PE 18:1-18:2;	GKAFCSRKMWFPSJ-RJXNKANHSA-N	9546753	CCCCCCCC/C=C\CCCCCCCC(=O)OC[C@H](COP(=O)(O)OCCN)OC(=O)CCCCCCC/C=C\C/C=C\CCCCC	0.272365	0.634184	0.606835	0.15289	0.00832967	0.0278653	IMPC_ECG_015_001___1 point	Electrocardiogram (ECG)	pNN5(6>ms)	IMPC_ECG_015_001	20	20	16	13	significant	Different size	IMPC_ECG_015_001	_0085_50
20121	ONLI_0255	CSHPOS	Triacylglycerols	TAG 56:6; TAG 18:0-18:2-20:4;	CKEOSPBKHRUVTN-WDVRSESKSA-N	131750374	CCCCCCCCCCCCCCCCCC(=O)OC[C@@H](COC(=O)CCC/C=C\C/C=C\C/C=C\C/C=C\CCCCC)OC(=O)CCCCCCC/C=C\C/C=C\CCCCC	0.621891	0.599454	0.638622	0.00031649	0.0141174	0.0188081	IMPC_ECG_015_001___1 point	Electrocardiogram (ECG)	pNN5(6>ms)	IMPC_ECG_015_001	20	20	16	13	significant	Different size	IMPC_ECG_015_001	_0085_64
20815	ONLI_0262	CSHPOS	Triacylglycerols	TAG 55:3; TAG 15:0-19:0-21:3;	0	NA	0	0.462202	0.656833	0.592387	0.0115918	0.00570593	0.0329002	IMPC_ECG_015_001___1 point	Electrocardiogram (ECG)	pNN5(6>ms)	IMPC_ECG_015_001	20	20	16	13	significant	Different size	IMPC_ECG_015_001	_0085_67
23915	ONLI_0294	CSHPOS	Triacylglycerols	TAG 56:6; TAG 16:0-18:1-22:5;	LXKOOMKDVRTCPD-NMQVVHJTSA-N	131755185	CCCCCCCCCCCCCCCC(=O)OC[C@@H](COC(=O)CCCCC/C=C\C/C=C\C/C=C\C/C=C\C/C=C\CC)OC(=O)CCCCCCCCC/C=C\CCCCCC	0.641053	0.649283	0.644401	0.000179052	0.00649407	0.0174326	IMPC_ECG_015_001___1 point	Electrocardiogram (ECG)	pNN5(6>ms)	IMPC_ECG_015_001	20	20	16	13	significant	Different size	IMPC_ECG_015_001	_0085_77
24215	ONLI_0299	CSHPOS	Triacylglycerols	TAG 51:4; TAG 16:0-17:2-18:2;	MBVRTVOCODAFTO-ZQYFXHSESA-N	138208584	CCCCCCCCCCCCCCCC(=O)OCC(COC(=O)CCCCCCCC/C=C\C=C/CCCCC)OC(=O)CCCCCCCCC/C=C\C/C=C\CC	0.460669	0.658343	0.5606	0.0119076	0.00555789	0.0462699	IMPC_ECG_015_001___1 point	Electrocardiogram (ECG)	pNN5(6>ms)	IMPC_ECG_015_001	20	20	16	13	significant	Different size	IMPC_ECG_015_001	_0085_78
24915	ONLI_0307	CSHPOS	Triacylglycerols	TAG 53:3; TAG 17:0-17:0-19:3;	0	NA	0	0.660727	0.673443	0.728202	9.57217e-05	0.00423952	0.00476537	IMPC_ECG_015_001___1 point	Electrocardiogram (ECG)	pNN5(6>ms)	IMPC_ECG_015_001	20	20	16	13	significant	Different size	IMPC_ECG_015_001	_0085_81
26016	ONLI_0319	CSHPOS	Triacylglycerols	TAG 55:4; TAG 15:1-19:0-21:3;	NJIJHXNPEZSWHJ-GGRUKSBGSA-N	138219306	CCCCCCCCCCCCCCCCCCC(=O)OC(COC(=O)CCCCCCC/C=C\CCCCC)COC(=O)CCCCCCC/C=C\C=C/C=C\CCCCCCC	0.479321	0.582845	0.679077	0.00851617	0.0178129	0.0106947	IMPC_ECG_015_001___1 point	Electrocardiogram (ECG)	pNN5(6>ms)	IMPC_ECG_015_001	20	20	16	13	significant	Different size	IMPC_ECG_015_001	_0085_87
32111	ONLI_0383	CSHPOS	Triacylglycerols	TAG 47:2; TAG 14:0-16:1-17:1;	TXTUHJQIYSFKNK-YWVGYDOYSA-N	138268019	CCCCCCCCCCCCCC(=O)OCC(COC(=O)CCCCC/C=C\CCCCCCCCC)OC(=O)CCCCC/C=C\CCCCCCCC	0.708937	0.821429	0.67533	0.00144135	0.034127	0.0321161	IMPC_ECG_015_001___1 point	Electrocardiogram (ECG)	pNN5(6>ms)	IMPC_ECG_015_001	7	17	16	13	significant	Different size	IMPC_ECG_015_001	_0085_107
34415	ONLI_0406	CSHPOS	Triacylglycerols	TAG 58:6; TAG 18:1-18:2-22:3;	WCIIIQSFALPOGU-CIRMXUQZSA-N	138286297	CCCCCC/C=C\CCCCCCCCCC(=O)OCC(COC(=O)CCCCCCCCCCC/C=C\C/C=C\C/C=C\CC)OC(=O)CCCCCCCC/C=C\C=C/CCCCC	0.64693	0.676462	0.673298	0.000149189	0.00400886	0.0116508	IMPC_ECG_015_001___1 point	Electrocardiogram (ECG)	pNN5(6>ms)	IMPC_ECG_015_001	20	20	16	13	significant	Different size	IMPC_ECG_015_001	_0085_117
3506	ONLI_0412	CSHPOS	Triacylglycerols	TAG 56:3; TAG 14:0-20:0-22:3;	WOXDUJQRLLENEU-JYISLEBKSA-N	138290251	CCCCCCCCCCCCCCCCCCCC(=O)OC(COC(=O)CCCCCCCCCCCCC)COC(=O)CCCCCCCCCCC/C=C\C/C=C\C/C=C\CC	0.331897	0.570765	0.55771	0.0785868	0.0209419	0.0476532	IMPC_ECG_015_001___1 point	Electrocardiogram (ECG)	pNN5(6>ms)	IMPC_ECG_015_001	20	20	16	13	significant	Different size	IMPC_ECG_015_001	_0085_122
35116	ONLI_0413	CSHPOS	Triacylglycerols	TAG 53:4; TAG 16:0-17:0-20:4;	WQFNYIJLJYJWKK-BNJGEZIZSA-N	134776734	CCCCCCCCCCCCCCCCC(=O)O[C@H](COC(=O)CCCCCCCCCCCCCCC)COC(=O)CCC/C=C/C/C=C/C/C=C/C/C=C/CCCCC	0.576667	0.596435	0.710864	0.00105858	0.0147402	0.00645293	IMPC_ECG_015_001___1 point	Electrocardiogram (ECG)	pNN5(6>ms)	IMPC_ECG_015_001	20	20	16	13	significant	Different size	IMPC_ECG_015_001	_0085_123
71314	ONLI_0972	HILICNEG	Hydroxybenzoic acid derivatives	Gentisinic acid	WXTMDXOMEHJXQO-UHFFFAOYSA-N	3469	C1=CC(=C(C=C1O)C(=O)O)O	0.649542	0.50772	0.809916	0.000183827	0.0446737	0.00140668	IMPC_ECG_015_001___1 point	Electrocardiogram (ECG)	pNN5(6>ms)	IMPC_ECG_015_001	20	19	16	13	significant	Different size	IMPC_ECG_015_001	_0085_191
2450	ONLI_0030	gctof	Cyclohexanols	pinitol	DSCFFEYYQKSRSV-FEPQRWDDSA-N	164619	COC1[C@@H]([C@H](C([C@@H]([C@@H]1O)O)O)O)O	0.456952	0.478947	0.547368	0.00345184	0.0397056	0.0138052	IMPC_GRS_001_001___2	Grip Strength	Forelimb grip strength measurement	IMPC_GRS_001_001.2	20	20	19	20	significant	Different size	IMPC_GRS_001_001.2	_0087_9
30234	ONLI_0362	CSHPOS	Cholesteryl esters	CE (18:1)	RJECHNNFRHZQKU-RMUVNZEASA-N	5283632	CCCCCCCC/C=C\CCCCCCCC(=O)O[C@H]1CC[C@@]2([C@H]3CC[C@]4([C@H]([C@@H]3CC=C2C1)CC[C@@H]4[C@H](C)CCCC(C)C)C)C	-0.599383	-0.477193	-0.640602	5.53042e-05	0.0405147	0.00294296	IMPC_GRS_001_001___2	Grip Strength	Forelimb grip strength measurement	IMPC_GRS_001_001.2	20	20	19	20	significant	Different size	IMPC_GRS_001_001.2	_0087_70
37825	ONLI_0441	CSHPOS	Acyl carnitines	AC 8:1	LOSHAHDSFZXVCT-LXKVQUBZSA-N	70679121	CCCCC/C=C/C(=O)O[C@@H](CC(=O)[O-])C[N+](C)(C)C	-0.454624	-0.545614	-0.446617	0.00364253	0.0172008	0.0498458	IMPC_GRS_001_001___2	Grip Strength	Forelimb grip strength measurement	IMPC_GRS_001_001.2	20	20	19	20	significant	Different size	IMPC_GRS_001_001.2	_0087_88
62315	ONLI_0811	HILICPOS	Phenylalanine and derivatives	N-Acetylphenylalanine	CBQJSKKFNMDLON-JTQLQIEISA-N	74839	CC(=O)N[C@@H](CC1=CC=CC=C1)C(=O)O	0.452295	0.531579	0.515789	0.00384234	0.0207625	0.0214037	IMPC_GRS_001_001___2	Grip Strength	Forelimb grip strength measurement	IMPC_GRS_001_001.2	20	20	19	20	significant	Different size	IMPC_GRS_001_001.2	_0087_147
63119	ONLI_0820	HILICPOS	Aminobenzoic acids	4-Aminobenzoic acid	ALYNCZNDIQEVRV-UHFFFAOYSA-N	978	C1=CC(=CC=C1C(=O)O)N	0.516678	0.464912	0.596992	0.000758503	0.046546	0.00639357	IMPC_GRS_001_001___2	Grip Strength	Forelimb grip strength measurement	IMPC_GRS_001_001.2	20	20	19	20	significant	Different size	IMPC_GRS_001_001.2	_0087_149
7288	ONLI_1031	HILICNEG	Phenylpyruvic acid derivatives	Phenylpyruvic acid	BTNMPGBKDVTSJY-UHFFFAOYSA-N	997	C1=CC=C(C=C1)CC(=O)C(=O)O	0.482325	0.557895	0.521053	0.00216503	0.0145044	0.023804	IMPC_GRS_001_001___2	Grip Strength	Forelimb grip strength measurement	IMPC_GRS_001_001.2	20	19	19	20	significant	Different size	IMPC_GRS_001_001.2	_0087_170
40022	ONLI_0477	CSHNEG	Long-chain fatty acids	FA 16:1	SECPZKHBENQXJG-FPLPWBNLSA-N	445638	CCCCCC/C=C\CCCCCCCC(=O)O	-0.42646	-0.529825	-0.454306	0.00678478	0.0212465	0.0441893	IMPC_GRS_002_001___2	Grip Strength	Forelimb and hindlimb grip strength measurement	IMPC_GRS_002_001.2	20	20	19	20	significant	Different size	IMPC_GRS_002_001.2	_0090_32
76631	ONLI_1143	Oxylipins	Lineolic acids and derivatives	9,10-DiHODE	QRHSEDZBZMZPOA-ZJSQCTGTSA-N	16061066	CC/C=C\C/C=C\CC(C(CCCCCCCC(=O)O)O)O	0.445435	0.461809	0.521085	0.00448762	0.0465383	0.0184747	IMPC_GRS_002_001___3	Grip Strength	Forelimb and hindlimb grip strength measurement	IMPC_GRS_002_001.3	20	20	19	20	significant	Different size	IMPC_GRS_002_001.3	_0091_127
21735	ONLI_0271	CSHPOS	Ceramides	Cer d40:1	CJROVRTUSFQVMR-GVOPMEMSSA-N	5283570	CCCCCCCCCCCCCCCCCCCCCCCCCC(=O)N[C@@H](CO)[C@@H](/C=C/CCCCCCCCCCCCC)O	0.845297	0.479122	0.449793	1.29269e-11	0.037937	0.0466093	IMPC_GRS_003_001___1 point	Grip Strength	Body weight	IMPC_GRS_003_001	20	20	19	20	significant	Different size	IMPC_GRS_003_001	_0092_78
28624	ONLI_0345	CSHPOS	Triacylglycerols	SMd34:0	ANBFFIILUQJIQL-XFGXVVNZSA-N	9544103	CCCCCCCCCCCCCCCCC(=O)OC[C@H](COC(=O)CCCCCCC/C=C\CCCCCCCC)OC(=O)CCCCCCC/C=C\CCCCCCCC	0.243394	0.516045	0.531027	0.135412	0.0237104	0.0159883	IMPC_GRS_003_001___1 point	Grip Strength	Body weight	IMPC_GRS_003_001	20	20	19	20	significant	Different size	IMPC_GRS_003_001	_0092_113
35828	ONLI_0420	CSHPOS	Monoalkylglycerophosphocholines	Lyso-PC o-18	XKBJVQHMEXMFDZ-AREMUKBSSA-N	2733532	CCCCCCCCCCCCCCCCCCOC[C@H](COP(=O)([O-])OCC[N+](C)(C)C)O	0.574871	0.690112	0.465589	0.000129334	0.0010751	0.0385625	IMPC_GRS_003_001___1 point	Grip Strength	Body weight	IMPC_GRS_003_001	20	20	19	20	significant	Different size	IMPC_GRS_003_001	_0092_146
28626	ONLI_0345	CSHPOS	Triacylglycerols	SMd34:0	ANBFFIILUQJIQL-XFGXVVNZSA-N	9544103	CCCCCCCCCCCCCCCCC(=O)OC[C@H](COC(=O)CCCCCCC/C=C\CCCCCCCC)OC(=O)CCCCCCC/C=C\CCCCCCCC	0.466397	0.505263	0.53985	0.00305059	0.0290236	0.0153757	IMPC_GRS_009_001___1 point	Grip Strength	Forelimb and hindlimb grip strength measurement mean	IMPC_GRS_009_001	20	20	19	20	significant	Different size	IMPC_GRS_009_001	_0094_54
34100	ONLI_0042	gctof	L-alpha-amino acids	ornithine	AHLPHDHHMVZTML-BYPYZUCNSA-N	6262	C(C[C@@H](C(=O)O)N)CN	0.438057	0.475439	0.467669	0.0056759	0.0413366	0.0391321	IMPC_GRS_010_001___1 point	Grip Strength	Forelimb grip strength normalised against body weight	IMPC_GRS_010_001	20	20	19	20	significant	Different size	IMPC_GRS_010_001	_0095_13
4288	ONLI_0051	gctof	Beta hydroxy acids and derivatives	malic acid	BJEPYKJPYRNKOW-UHFFFAOYSA-N	525	C(C(C(=O)O)O)C(=O)O	0.168936	0.463158	0.52782	0.303907	0.0474618	0.0181883	IMPC_GRS_010_001___1 point	Grip Strength	Forelimb grip strength normalised against body weight	IMPC_GRS_010_001	20	20	19	20	significant	Different size	IMPC_GRS_010_001	_0095_15
50106	ONLI_0061	gctof	Isoleucine and derivatives	isoleucine	AGPKZVBTJJNPAG-WHFBIAKZSA-N	6306	CC[C@H](C)[C@@H](C(=O)O)N	0.57996	0.557895	0.566917	0.000144722	0.0145044	0.0103238	IMPC_GRS_010_001___1 point	Grip Strength	Forelimb grip strength normalised against body weight	IMPC_GRS_010_001	20	20	19	20	significant	Different size	IMPC_GRS_010_001	_0095_20
8332	ONLI_0098	gctof	Oxepanes	conduritol-beta-epoxide	ZHMWOVGZCINIHW-SPHYCDKFSA-N	9989541	[C@@H]1([C@@H]([C@H](C2C([C@@H]1O)O2)O)O)O	0.412551	0.526316	0.481203	0.00953892	0.0222416	0.0332671	IMPC_GRS_010_001___1 point	Grip Strength	Forelimb grip strength normalised against body weight	IMPC_GRS_010_001	20	20	19	20	significant	Different size	IMPC_GRS_010_001	_0095_31
16430	ONLI_0213	CSHPOS	Phosphatidylcholines	PC40:4	FHUAYOMRHXZKHT-JUGJLYODSA-N	53479183	CCCCCCCC/C=C\CCCCCCCCCCCC(=O)OC[C@H](COP(=O)([O-])OCC[N+](C)(C)C)OC(=O)CCCCCCC/C=C\C/C=C\C/C=C\CC	-0.500202	-0.463158	-0.503759	0.00136124	0.0474618	0.0250626	IMPC_GRS_010_001___1 point	Grip Strength	Forelimb grip strength normalised against body weight	IMPC_GRS_010_001	20	20	19	20	significant	Different size	IMPC_GRS_010_001	_0095_47
22238	ONLI_0276	CSHPOS	Phosphatidylcholines	PC 36:5; PC 16:0-20:5;	KLTHQSWIRFFBRI-RWSHWRRPSA-O	5313224	CCCCCCCCCCCCCCCC(=O)OCC(COP(=O)(O)OCC[N+](C)(C)C)OC(=O)CCC/C=C/C/C=C/C/C=C/C/C=C/C/C=C/CC	-0.701822	-0.505263	-0.524812	1.60879e-06	0.0290236	0.0189528	IMPC_GRS_010_001___1 point	Grip Strength	Forelimb grip strength normalised against body weight	IMPC_GRS_010_001	20	20	19	20	significant	Different size	IMPC_GRS_010_001	_0095_65
27626	ONLI_0335	CSHPOS	1-acyl-sn-glycero-3-phosphocholines	LPC 22:1	PAFOXYLFALKPOE-BKAVPCLVSA-N	53480471	CCCCCCCC/C=C\CCCCCCCCCCCC(=O)OC[C@H](COP(=O)([O-])OCC[N+](C)(C)C)O	-0.821053	-0.631579	-0.482707	1.78377e-08	0.00456396	0.0326611	IMPC_GRS_010_001___1 point	Grip Strength	Forelimb grip strength normalised against body weight	IMPC_GRS_010_001	20	20	19	20	significant	Different size	IMPC_GRS_010_001	_0095_89
62520	ONLI_0813	HILICPOS	Tyrosine and derivatives	N-Methyltyrosine	MWZPENIJLUWBSY-VIFPVBQESA-N	70652	COC(=O)[C@H](CC1=CC=C(C=C1)O)N	0.411336	0.496491	0.678195	0.00976898	0.0322937	0.00136819	IMPC_GRS_010_001___1 point	Grip Strength	Forelimb grip strength normalised against body weight	IMPC_GRS_010_001	20	20	19	20	significant	Different size	IMPC_GRS_010_001	_0095_279
10319	ONLI_0123	gctof	Short-chain keto acids and derivatives	2-ketoisocaproic acid	BKAJNAXTPSGJCU-UHFFFAOYSA-N	70	CC(C)CC(=O)C(=O)O	0.54776	0.523914	0.769326	0.000544367	0.0213115	0.000305733	IMPC_HEM_002_001___1 point	Hematology	Red blood cell count	IMPC_HEM_002_001	20	20	19	17	significant	Different size	IMPC_HEM_002_001	_0098_8
31244	ONLI_0373	CSHPOS	Phosphatidylcholines	PC 36:2	SNKAWJBJQDLSFF-NVKMUCNASA-N	10350317	CCCCCCCC/C=C\CCCCCCCC(=O)OC[C@H](COP(=O)([O-])OCC[N+](C)(C)C)OC(=O)CCCCCCC/C=C\CCCCCCCC	-0.222265	-0.465525	-0.504295	0.192611	0.0445771	0.0389942	IMPC_HEM_004_001___1 point	Hematology	Hematocrit	IMPC_HEM_004_001	20	20	19	17	significant	Different size	IMPC_HEM_004_001	_00100_31
61416	ONLI_0798	HILICPOS	Dipeptides	Ala-Ile	ZSOICJZJSRWNHX-UHFFFAOYSA-N	417358	CCC(C)C(C(=O)O)NC(=O)C(C)N	0.299331	0.535793	0.578658	0.0905935	0.0180576	0.0301581	IMPC_HEM_004_001___1 point	Hematology	Hematocrit	IMPC_HEM_004_001	20	16	19	17	significant	Different size	IMPC_HEM_004_001	_00100_79
22042	ONLI_0274	CSHPOS	1-alkyl,2-acylglycerophosphoethanolamines	PE 38:7e; PE 16:1e/22:6; [M+H]+	KGCPGAKRLOCUEV-ZLXBYIIJSA-N	138193153	CCCCCC/C=C\CCCCCCCCOCC(COP(=O)(O)OCCN)OC(=O)CC/C=C\C/C=C\C/C=C\C/C=C\C/C=C\C/C=C\CC	0.0279929	0.484586	0.564231	0.871258	0.0354949	0.0183073	IMPC_HEM_006_001___1 point	Hematology	Mean corpuscular hemoglobin	IMPC_HEM_006_001	20	20	19	17	significant	Different size	IMPC_HEM_006_001	_00102_29
28629	ONLI_0345	CSHPOS	Triacylglycerols	SMd34:0	ANBFFIILUQJIQL-XFGXVVNZSA-N	9544103	CCCCCCCCCCCCCCCCC(=O)OC[C@H](COC(=O)CCCCCCC/C=C\CCCCCCCC)OC(=O)CCCCCCC/C=C\CCCCCCCC	0.51303	0.477538	0.485559	0.00137635	0.0386688	0.0481681	IMPC_HEM_006_001___1 point	Hematology	Mean corpuscular hemoglobin	IMPC_HEM_006_001	20	20	19	17	significant	Different size	IMPC_HEM_006_001	_00102_43
31245	ONLI_0373	CSHPOS	Phosphatidylcholines	PC 36:2	SNKAWJBJQDLSFF-NVKMUCNASA-N	10350317	CCCCCCCC/C=C\CCCCCCCC(=O)OC[C@H](COP(=O)([O-])OCC[N+](C)(C)C)OC(=O)CCCCCCC/C=C\CCCCCCCC	0.183824	0.478419	0.561773	0.283182	0.0382605	0.0189344	IMPC_HEM_006_001___1 point	Hematology	Mean corpuscular hemoglobin	IMPC_HEM_006_001	20	20	19	17	significant	Different size	IMPC_HEM_006_001	_00102_45
55150	ONLI_0675	CSHNEG	Phosphatidylcholines	PC 40:4	UAVRPIXHIHJERN-CBTSKTMBSA-N	24779048	CCCCCCCCCCCCCCCCCCCC(=O)OC[C@H](COP(=O)([O-])OCC[N+](C)(C)C)OC(=O)CCC/C=C\C/C=C\C/C=C\C/C=C\CCCCC	0.0121259	0.540093	0.640446	0.944042	0.0169822	0.00561171	IMPC_HEM_006_001___1 point	Hematology	Mean corpuscular hemoglobin	IMPC_HEM_006_001	20	20	19	17	significant	Different size	IMPC_HEM_006_001	_00102_107
57924	ONLI_0739	HILICPOS	Acyl carnitines	Isovaleryl-L-carnitine	IGQBPDJNUXPEMT-UHFFFAOYSA-N	6426851	CC(C)CC(=O)OC(CC(=O)[O-])C[N+](C)(C)C	0.497163	0.517186	0.492934	0.00203726	0.0233502	0.0443815	IMPC_HEM_006_001___1 point	Hematology	Mean corpuscular hemoglobin	IMPC_HEM_006_001	20	20	19	17	significant	Different size	IMPC_HEM_006_001	_00102_117
20940	ONLI_0263	CSHPOS	Phosphatidylcholines	PC34:2	JLPULHDHAOZNQI-ZTIMHPMXSA-N	5287971	CCCCCCCCCCCCCCCC(=O)OC[C@H](COP(=O)([O-])OCC[N+](C)(C)C)OC(=O)CCCCCCC/C=C\C/C=C\CCCCC	0.200026	0.489672	0.483436	0.242135	0.0333331	0.0493015	IMPC_HEM_007_001___1 point	Hematology	Mean cell hemoglobin concentration	IMPC_HEM_007_001	20	20	19	17	significant	Different size	IMPC_HEM_007_001	_00103_22
24338	ONLI_0300	CSHPOS	Phosphatidylcholines	PC37:2	MCZUABDVGPPWPM-HJTCUGKVSA-N	52922735	CCCCCCCCCCCCCCCCCCC(=O)O[C@H](COC(=O)CCCCCCC/C=C\C/C=C\CCCCC)COP(=O)([O-])OCC[N+](C)(C)C	0.179031	0.479122	0.550921	0.296139	0.037937	0.0219053	IMPC_HEM_007_001___1 point	Hematology	Mean cell hemoglobin concentration	IMPC_HEM_007_001	20	20	19	17	significant	Different size	IMPC_HEM_007_001	_00103_24
24833	ONLI_0306	CSHPOS	Phosphatidylcholines	PC35:2 A	MJWAVUYQCBFFHQ-WESJWMGVSA-N	52922721	CCCCCCCCCCCCCCCCC(=O)O[C@H](COC(=O)CCCCCCC/C=C\C/C=C\CCCCC)COP(=O)([O-])OCC[N+](C)(C)C	0.208269	0.501979	0.511657	0.222869	0.0285236	0.0357786	IMPC_HEM_007_001___1 point	Hematology	Mean cell hemoglobin concentration	IMPC_HEM_007_001	20	20	19	17	significant	Different size	IMPC_HEM_007_001	_00103_25
48623	ONLI_0593	CSHNEG	1-alkyl,2-acylglycero-3-phosphocholines	PC 34:2e; PC 16:0e/18:2;	IQACMFWAGALEAQ-WESJWMGVSA-N	6443157	CCCCCCCCCCCCCCCCOC[C@H](COP(=O)([O-])OCC[N+](C)(C)C)OC(=O)CCCCCCC/C=C\C/C=C\CCCCC	0.175811	0.472968	0.521473	0.305053	0.0408405	0.0318106	IMPC_HEM_007_001___1 point	Hematology	Mean cell hemoglobin concentration	IMPC_HEM_007_001	20	20	19	17	significant	Different size	IMPC_HEM_007_001	_00103_87
850	ONLI_0009	gctof	Tyrosine and derivatives	tyrosine	OUYCCCASQSFEME-QMMMGPOBSA-N	6057	C1=CC(=CC=C1C[C@@H](C(=O)O)N)O	0.398739	0.463361	0.519608	0.0160027	0.0457112	0.0346093	IMPC_HEM_029_001___1 point	Hematology	Neutrophil differential count	IMPC_HEM_029_001	20	20	19	17	significant	Different size	IMPC_HEM_029_001	_00107_4
18104	ONLI_0023	gctof	Pentoses	ribose	HMFHBZSHGGEWLO-SOOFDHNKSA-N	5779	C([C@@H]1[C@H]([C@H](C(O1)O)O)O)O	0.474677	0.47477	0.605392	0.00344329	0.0399734	0.0115927	IMPC_HEM_029_001___1 point	Hematology	Neutrophil differential count	IMPC_HEM_029_001	20	20	19	17	significant	Different size	IMPC_HEM_029_001	_00107_12
43102	ONLI_0052	gctof	Glucuronic acid derivatives	lyxose	AEMOLEFTQBMNLQ-DTEWXJGMSA-N	441476	[C@@H]1([C@H]([C@H](O[C@H]([C@@H]1O)O)C(=O)O)O)O	0.362572	0.545853	0.504902	0.0297648	0.0156223	0.0407898	IMPC_HEM_029_001___1 point	Hematology	Neutrophil differential count	IMPC_HEM_029_001	20	20	19	17	significant	Different size	IMPC_HEM_029_001	_00107_23
7340	ONLI_0087	gctof	Hexoses	glucose	WQZGKKKJIJFFOK-VFUOTHLCSA-N	64689	C([C@@H]1[C@H]([C@@H]([C@H]([C@@H](O1)O)O)O)O)O	0.514576	0.516893	0.529412	0.0013234	0.0234421	0.030913	IMPC_HEM_029_001___1 point	Hematology	Neutrophil differential count	IMPC_HEM_029_001	20	20	19	17	significant	Different size	IMPC_HEM_029_001	_00107_33
60020	ONLI_0770	HILICPOS	Dipeptides	Ser-Tyr	MALNXHYEPCSPPU-UHFFFAOYSA-N	4575735	C1=CC(=CC=C1CC(C(=O)O)NC(=O)C(CO)N)O	0.556664	0.584467	0.534314	0.000422118	0.0085883	0.0291847	IMPC_HEM_029_001___1 point	Hematology	Neutrophil differential count	IMPC_HEM_029_001	20	20	19	17	significant	Different size	IMPC_HEM_029_001	_00107_118
61016	ONLI_0791	HILICPOS	Guanidines	3-Guanidinopropionic acid	KMXXSJLYVJEBHI-UHFFFAOYSA-N	67701	C(CN=C(N)N)C(=O)O	0.613038	0.487056	0.52451	7.04077e-05	0.0344319	0.0327204	IMPC_HEM_029_001___1 point	Hematology	Neutrophil differential count	IMPC_HEM_029_001	20	20	19	17	significant	Different size	IMPC_HEM_029_001	_00107_121
64816	ONLI_0846	HILICPOS	Alpha amino acids and derivatives	Creatine	CVSVTCORWBXHQV-UHFFFAOYSA-N	586	CN(CC(=O)O)C(=N)N	0.613038	0.487056	0.52451	7.04077e-05	0.0344319	0.0327204	IMPC_HEM_029_001___1 point	Hematology	Neutrophil differential count	IMPC_HEM_029_001	20	20	19	17	significant	Different size	IMPC_HEM_029_001	_00107_133
7307	ONLI_0008	gctof	Pyrimidones	uracil	ISAKRJDGNUQOIC-UHFFFAOYSA-N	1174	C1=CNC(=O)NC1=O	0.463826	0.498683	0.543225	0.00438162	0.0297547	0.0242231	IMPC_HEM_030_001___1 point	Hematology	Neutrophil cell count	IMPC_HEM_030_001	20	20	19	17	significant	Different size	IMPC_HEM_030_001	_00108_4
37138	ONLI_0434	CSHPOS	Triacylglycerols	TAG 47:1; TAG 15:0-16:0-16:1;	RCYIETYFTUBXFK-KWLHUJJFSA-N	131754159	CCCCCCCCCCCCCCCC(=O)O[C@@H](COC(=O)CCCCCCCCCCCCCC)COC(=O)CCCCCCC/C=C\CCCCCC	-0.183541	-0.490497	-0.505212	0.298783	0.0456071	0.0385823	IMPC_HEM_030_001___1 point	Hematology	Neutrophil cell count	IMPC_HEM_030_001	18	19	19	17	significant	Different size	IMPC_HEM_030_001	_00108_138
17104	ONLI_0022	gctof	Glucuronic acid derivatives	saccharic acid	DSLZVSRJTYRBFB-LLEIAEIESA-N	33037	[C@H]([C@@H]([C@@H](C(=O)O)O)O)([C@H](C(=O)O)O)O	-0.618959	-0.570175	-0.495098	5.71703e-05	0.0121607	0.045363	IMPC_HEM_031_001___1 point	Hematology	Lymphocyte differential count	IMPC_HEM_031_001	20	20	19	17	significant	Different size	IMPC_HEM_031_001	_00109_10
51107	ONLI_0062	gctof	Sugar acids and derivatives	isohexonic acid	RGHNJXZEOKUKBD-SQOUGZDYSA-N	10690	C([C@H]([C@H]([C@@H]([C@H](C(=O)O)O)O)O)O)O	-0.650235	-0.463158	-0.590686	1.76689e-05	0.0474618	0.0142436	IMPC_HEM_031_001___1 point	Hematology	Lymphocyte differential count	IMPC_HEM_031_001	20	20	19	17	significant	Different size	IMPC_HEM_031_001	_00109_24
60022	ONLI_0770	HILICPOS	Dipeptides	Ser-Tyr	MALNXHYEPCSPPU-UHFFFAOYSA-N	4575735	C1=CC(=CC=C1CC(C(=O)O)NC(=O)C(CO)N)O	-0.439925	-0.485965	-0.546569	0.00725642	0.0365955	0.0251944	IMPC_HEM_032_001___1 point	Hematology	Lymphocyte cell count	IMPC_HEM_032_001	20	20	19	17	significant	Different size	IMPC_HEM_032_001	_00110_54
70819	ONLI_0954	HILICNEG	Methyl-branched fatty acids	Citraconic acid	HNEGQIOMVPPMNR-IHWYPQMZSA-N	643798	C/C(=C/C(=O)O)/C(=O)O	0.568248	0.622807	0.561275	0.000299918	0.00530932	0.0209873	IMPC_HEM_032_001___1 point	Hematology	Lymphocyte cell count	IMPC_HEM_032_001	20	19	19	17	significant	Different size	IMPC_HEM_032_001	_00110_68
34107	ONLI_0042	gctof	L-alpha-amino acids	ornithine	AHLPHDHHMVZTML-BYPYZUCNSA-N	6262	C(C[C@@H](C(=O)O)N)CN	0.532631	0.594537	0.535759	0.000825437	0.00725983	0.0266491	IMPC_HEM_037_001___1 point	Hematology	Basophil cell count	IMPC_HEM_037_001	20	20	19	17	significant	Different size	IMPC_HEM_037_001	_00115_9
35837	ONLI_0420	CSHPOS	Monoalkylglycerophosphocholines	Lyso-PC o-18	XKBJVQHMEXMFDZ-AREMUKBSSA-N	2733532	CCCCCCCCCCCCCCCCCCOC[C@H](COP(=O)([O-])OCC[N+](C)(C)C)O	-0.51649	-0.578683	-0.619472	0.00126034	0.00943635	0.00800103	IMPC_HEM_037_001___1 point	Hematology	Basophil cell count	IMPC_HEM_037_001	20	20	19	17	significant	Different size	IMPC_HEM_037_001	_00115_52
34108	ONLI_0042	gctof	L-alpha-amino acids	ornithine	AHLPHDHHMVZTML-BYPYZUCNSA-N	6262	C(C[C@@H](C(=O)O)N)CN	0.459427	0.542216	0.499704	0.00482081	0.0164705	0.0411078	IMPC_HEM_038_001___1 point	Hematology	Basophil differential count	IMPC_HEM_038_001	20	20	19	17	significant	Different size	IMPC_HEM_038_001	_00116_9
35838	ONLI_0420	CSHPOS	Monoalkylglycerophosphocholines	Lyso-PC o-18	XKBJVQHMEXMFDZ-AREMUKBSSA-N	2733532	CCCCCCCCCCCCCCCCCCOC[C@H](COP(=O)([O-])OCC[N+](C)(C)C)O	-0.443118	-0.585796	-0.484446	0.00679724	0.00840244	0.0487597	IMPC_HEM_038_001___1 point	Hematology	Basophil differential count	IMPC_HEM_038_001	20	20	19	17	significant	Different size	IMPC_HEM_038_001	_00116_50
22148	ONLI_0275	CSHPOS	Phosphatidylcholines	PC16:0/16:0	KILNVBDSWZSGLL-KXQOOQHDSA-N	452110	CCCCCCCCCCCCCCCC(=O)OC[C@H](COP(=O)([O-])OCC[N+](C)(C)C)OC(=O)CCCCCCCCCCCCCCC	0.560987	0.490779	0.472358	0.000166237	0.0280063	0.0354636	IMPC_HWT_007_001___1 point	Heart Weight	Body weight	IMPC_HWT_007_001	20	20	20	20	significant	Different size	IMPC_HWT_007_001	_00117_67
23225	ONLI_0287	CSHPOS	Phosphosphingolipids	N-Octadecanoylsphing-4-enine-1-phosphocholine	LKQLRGMMMAHREN-YJFXYUILSA-N	6453725	CCCCCCCCCCCCCCCCCC(=O)N[C@@H](COP(=O)([O-])OCC[N+](C)(C)C)[C@@H](/C=C/CCCCCCCCCCCCC)O	-0.382154	0.487016	0.458819	0.0149546	0.0294193	0.0418673	IMPC_HWT_007_001___1 point	Heart Weight	Body weight	IMPC_HWT_007_001	20	20	20	20	significant	Different size	IMPC_HWT_007_001	_00117_73
31838	ONLI_0380	CSHPOS	1-acyl,2-alkylglycero-3-phosphocholines	PCo-32:0	SVWBXNAUENUONE-LDLOPFEMSA-N	173570	CCCCCCCCCCCCCCCCO[C@H](COC(=O)CCCCCCCCCCCCCCC)COP(=O)([O-])OCC[N+](C)(C)C	0.799306	0.514867	0.467093	6.24733e-10	0.0201805	0.0378563	IMPC_HWT_007_001___1 point	Heart Weight	Body weight	IMPC_HWT_007_001	20	20	20	20	significant	Different size	IMPC_HWT_007_001	_00117_111
37739	ONLI_0440	CSHPOS	Phosphosphingolipids	SMd34:2	OAHFTKWSJGVMTG-MBIABJCFSA-N	52931145	CCCCCCCCCCCCC/C=C/[C@H]([C@H](COP(=O)([O-])OCC[N+](C)(C)C)NC(=O)CCCCCCC/C=C\CCCCCC)O	0.819572	0.603689	0.537796	9.9914e-11	0.00482575	0.0144546	IMPC_HWT_007_001___1 point	Heart Weight	Body weight	IMPC_HWT_007_001	20	20	20	20	significant	Different size	IMPC_HWT_007_001	_00117_136
42731	ONLI_0516	CSHNEG	1-acyl-sn-glycero-3-phosphocholines	LPC 18:0	IHNKQIMGVNPMTC-RUZDIDTESA-N	497299	CCCCCCCCCCCCCCCCCC(=O)OC[C@H](COP(=O)([O-])OCC[N+](C)(C)C)O	0.015106	0.718856	0.446785	0.926289	0.00035533	0.0482783	IMPC_HWT_007_001___1 point	Heart Weight	Body weight	IMPC_HWT_007_001	20	20	20	20	significant	Different size	IMPC_HWT_007_001	_00117_164
45938	ONLI_0564	CSHNEG	1-alkyl,2-acylglycerophosphoethanolamines	PE 38:6e; PE 18:1e/20:5;	WHKDVYYCCUAIBY-QSOAFSPRSA-N	138287875	CCCCCCCC/C=C\CCCCCCCCOCC(COP(=O)(O)OCCN)OC(=O)CCC/C=C\C/C=C\C/C=C\C/C=C\C/C=C\CC	0.680803	0.44411	0.561865	1.33752e-06	0.0498	0.00993078	IMPC_HWT_007_001___1 point	Heart Weight	Body weight	IMPC_HWT_007_001	20	20	20	20	significant	Different size	IMPC_HWT_007_001	_00117_184
46449	ONLI_0569	CSHNEG	Sphingomyelins	SM d34:2; SM d18:2/16:0;	YLWSJLLZUHSIEA-CKSUKHGVSA-N	52931235	CCCCCCCCCCCCCCCC(=O)N[C@@H](COP(=O)([O-])OCC[N+](C)(C)C)[C@@H](/C=C/CCCCCCCC/C=C\CCC)O	0.843686	0.635303	0.573148	8.17995e-12	0.00261287	0.008249	IMPC_HWT_007_001___1 point	Heart Weight	Body weight	IMPC_HWT_007_001	20	20	20	20	significant	Different size	IMPC_HWT_007_001	_00117_186
53941	ONLI_0663	CSHNEG	Phosphatidylcholines	PC 38:1; PC 20:0-18:1;	IKNYBQRADNMEDT-FHLWKLDVSA-N	24779038	CCCCCCCCCCCCCCCCCCCC(=O)OC[C@H](COP(=O)([O-])OCC[N+](C)(C)C)OC(=O)CCCCCCC/C=C\CCCCCCCC	0.832333	0.501318	0.468597	2.79131e-11	0.0243323	0.0371603	IMPC_HWT_007_001___1 point	Heart Weight	Body weight	IMPC_HWT_007_001	20	20	20	20	significant	Different size	IMPC_HWT_007_001	_00117_233
34017	ONLI_0402	CSHPOS	1-acyl-sn-glycero-3-phosphocholines	LPC 14:0	VXUOFDJKYGDUJI-OAQYLSRUSA-N	460604	CCCCCCCCCCCCCC(=O)OC[C@H](COP(=O)([O-])OCC[N+](C)(C)C)O	-0.371358	-0.542579	-0.492666	0.0183116	0.0134442	0.0273182	IMPC_HWT_008_001___1 point	Heart Weight	Heart weight	IMPC_HWT_008_001	20	20	20	20	significant	Different size	IMPC_HWT_008_001	_00118_86
38619	ONLI_0450	CSHPOS	1-acyl-sn-glycero-3-phosphocholines	LPC 20:2	YYQVCMMXPIJVHY-ZOIJLGJPSA-N	52924053	CCCCC/C=C\C/C=C\CCCCCCCCCC(=O)OC[C@H](COP(=O)([O-])OCC[N+](C)(C)C)O	0.101356	-0.483046	-0.506205	0.533737	0.0309699	0.0227632	IMPC_HWT_008_001___1 point	Heart Weight	Heart weight	IMPC_HWT_008_001	20	20	20	20	significant	Different size	IMPC_HWT_008_001	_00118_101
57928	ONLI_0739	HILICPOS	Acyl carnitines	Isovaleryl-L-carnitine	IGQBPDJNUXPEMT-UHFFFAOYSA-N	6426851	CC(C)CC(=O)OC(CC(=O)[O-])C[N+](C)(C)C	0.0877481	0.452149	0.498684	0.590294	0.0453337	0.0252126	IMPC_HWT_008_001___1 point	Heart Weight	Heart weight	IMPC_HWT_008_001	20	20	20	20	significant	Different size	IMPC_HWT_008_001	_00118_163
7377	ONLI_0087	gctof	Hexoses	glucose	WQZGKKKJIJFFOK-VFUOTHLCSA-N	64689	C([C@@H]1[C@H]([C@@H]([C@H]([C@@H](O1)O)O)O)O)O	0.496998	0.520301	0.497744	0.00126976	0.0201482	0.0270715	IMPC_HWT_012_001___1 point	Heart Weight	Heart weight normalised against body weight	IMPC_HWT_012_001	20	20	20	20	significant	Different size	IMPC_HWT_012_001	_00119_11
12137	ONLI_0168	CSHPOS	Phosphatidylcholines	PC36:1	ATHVAWFAEPLPPQ-VRDBWYNSSA-N	24778825	CCCCCCCCCCCCCCCCCC(=O)OC[C@H](COP(=O)([O-])OCC[N+](C)(C)C)OC(=O)CCCCCCC/C=C\CCCCCCCC	-0.240901	-0.545865	-0.592481	0.13406	0.0141083	0.00688833	IMPC_HWT_012_001___1 point	Heart Weight	Heart weight normalised against body weight	IMPC_HWT_012_001	20	20	20	20	significant	Different size	IMPC_HWT_012_001	_00119_21
16437	ONLI_0213	CSHPOS	Phosphatidylcholines	PC40:4	FHUAYOMRHXZKHT-JUGJLYODSA-N	53479183	CCCCCCCC/C=C\CCCCCCCCCCCC(=O)OC[C@H](COP(=O)([O-])OCC[N+](C)(C)C)OC(=O)CCCCCCC/C=C\C/C=C\C/C=C\CC	-0.380675	-0.548872	-0.508271	0.0159222	0.0135073	0.0236359	IMPC_HWT_012_001___1 point	Heart Weight	Heart weight normalised against body weight	IMPC_HWT_012_001	20	20	20	20	significant	Different size	IMPC_HWT_012_001	_00119_33
17626	ONLI_0227	CSHPOS	1-acyl-sn-glycero-3-phosphocholines	LPC 20:4	GOMVPVRDBLLHQC-VEJNOCSESA-N	53480469	CC/C=C\C/C=C\C/C=C\C/C=C\CCCCCCC(=O)OC[C@H](COP(=O)([O-])OCC[N+](C)(C)C)O	-0.48424	-0.515789	-0.46015	0.00174612	0.0214037	0.0427264	IMPC_HWT_012_001___1 point	Heart Weight	Heart weight normalised against body weight	IMPC_HWT_012_001	20	20	20	20	significant	Different size	IMPC_HWT_012_001	_00119_37
17919	ONLI_0230	CSHPOS	1-acyl-sn-glycero-3-phosphocholines	LPC 22:4	ZOJBSSVHFSBHMP-JJJSWPRASA-N	52924039	CCCCC/C=C\C/C=C\C/C=C\C/C=C\CCCCCC(=O)OC[C@H](COP(=O)([O-])OCC[N+](C)(C)C)O	-0.376923	-0.535338	-0.446617	0.0170577	0.0163857	0.0498458	IMPC_HWT_012_001___1 point	Heart Weight	Heart weight normalised against body weight	IMPC_HWT_012_001	20	20	20	20	significant	Different size	IMPC_HWT_012_001	_00119_39
22249	ONLI_0276	CSHPOS	Phosphatidylcholines	PC 36:5; PC 16:0-20:5;	KLTHQSWIRFFBRI-RWSHWRRPSA-O	5313224	CCCCCCCCCCCCCCCC(=O)OCC(COP(=O)(O)OCC[N+](C)(C)C)OC(=O)CCC/C=C/C/C=C/C/C=C/C/C=C/C/C=C/CC	-0.251595	-0.550376	-0.475188	0.117245	0.0132148	0.0357808	IMPC_HWT_012_001___1 point	Heart Weight	Heart weight normalised against body weight	IMPC_HWT_012_001	20	20	20	20	significant	Different size	IMPC_HWT_012_001	_00119_55
22341	ONLI_0277	CSHPOS	Phosphatidylcholines	PC38:3	KNNHXKQRTYEWCA-HYYWERRFSA-N	53478919	CCCCCC/C=C\CCCCCCCCCC(=O)O[C@H](COC(=O)CCCCCCCCC/C=C\C/C=C\CCCCC)COP(=O)([O-])OCC[N+](C)(C)C	-0.373546	-0.798496	-0.593985	0.0181378	3.07505e-05	0.00672003	IMPC_HWT_012_001___1 point	Heart Weight	Heart weight normalised against body weight	IMPC_HWT_012_001	20	20	20	20	significant	Different size	IMPC_HWT_012_001	_00119_56
23619	ONLI_0291	CSHPOS	1-acyl-sn-glycero-3-phosphocholines	LPC 22:6	LSOWKZULVQWMLY-APPDJCNMSA-N	10415542	CC/C=C\C/C=C\C/C=C\C/C=C\C/C=C\C/C=C\CCC(=O)OC[C@H](COP(=O)([O-])OCC[N+](C)(C)C)O	-0.539587	-0.616541	-0.461654	0.000401827	0.00457438	0.0419875	IMPC_HWT_012_001___1 point	Heart Weight	Heart weight normalised against body weight	IMPC_HWT_012_001	20	20	20	20	significant	Different size	IMPC_HWT_012_001	_00119_62
27138	ONLI_0330	CSHPOS	Phosphatidylcholines	PC37:3	WZCLAXMADUBPSG-RIXBAXMTSA-N	52922657	CCCCCCCCCCCCCCCCCC(=O)OC[C@H](COP(=O)([O-])OCC[N+](C)(C)C)OC(=O)CCCCCCC/C=C\C/C=C\C/C=C\CC	-0.183865	-0.729323	-0.464662	0.255099	0.000391689	0.04054	IMPC_HWT_012_001___1 point	Heart Weight	Heart weight normalised against body weight	IMPC_HWT_012_001	20	20	20	20	significant	Different size	IMPC_HWT_012_001	_00119_70
28739	ONLI_0346	CSHPOS	Phosphatidylcholines	PC 32:1; PC 16:0-16:1;	QIBZFHLFHCIUOT-NPBIGWJUSA-N	6443788	CCCCCCCCCCCCCCCC(=O)OC[C@H](COP(=O)([O-])OCC[N+](C)(C)C)OC(=O)CCCCCCC/C=C\CCCCCC	-0.156848	-0.625564	-0.506767	0.332525	0.00389246	0.024104	IMPC_HWT_012_001___1 point	Heart Weight	Heart weight normalised against body weight	IMPC_HWT_012_001	20	20	20	20	significant	Different size	IMPC_HWT_012_001	_00119_78
34018	ONLI_0402	CSHPOS	1-acyl-sn-glycero-3-phosphocholines	LPC 14:0	VXUOFDJKYGDUJI-OAQYLSRUSA-N	460604	CCCCCCCCCCCCCC(=O)OC[C@H](COP(=O)([O-])OCC[N+](C)(C)C)O	-0.569606	-0.760902	-0.494737	0.000163307	0.000148858	0.0281232	IMPC_HWT_012_001___1 point	Heart Weight	Heart weight normalised against body weight	IMPC_HWT_012_001	20	20	20	20	significant	Different size	IMPC_HWT_012_001	_00119_99
35434	ONLI_0416	CSHPOS	Phosphatidylcholines	PC34:1	WTJKGGKOPKCXLL-VYOBOKEXSA-N	5497103	CCCCCCCCCCCCCCCC(=O)OC[C@H](COP(=O)([O-])OCC[N+](C)(C)C)OC(=O)CCCCCCC/C=C\CCCCCCCC	-0.194371	-0.604511	-0.580451	0.228577	0.00563412	0.00836368	IMPC_HWT_012_001___1 point	Heart Weight	Heart weight normalised against body weight	IMPC_HWT_012_001	20	20	20	20	significant	Different size	IMPC_HWT_012_001	_00119_106
36536	ONLI_0427	CSHPOS	1-acyl-sn-glycero-3-phosphocholines	LPC 20:3 b	XUDGAAFUMTTZCO-QNEBEIHSSA-N	138300357	CC/C=C\C/C=C\C/C=C\CCCCCCCCCC(=O)OCC(COP(=O)([O-])OCC[N+](C)(C)C)O	-0.382552	-0.592481	-0.603008	0.015379	0.00688833	0.00577973	IMPC_HWT_012_001___1 point	Heart Weight	Heart weight normalised against body weight	IMPC_HWT_012_001	20	20	20	20	significant	Different size	IMPC_HWT_012_001	_00119_108
36723	ONLI_0429	CSHPOS	Phosphatidylcholines	PC 36:6; PC 18:3-18:3;	XXKFQTJOJZELMD-JICBSJGISA-N	24778990	CC/C=C\C/C=C\C/C=C\CCCCCCCC(=O)OC[C@H](COP(=O)([O-])OCC[N+](C)(C)C)OC(=O)CCCCCCC/C=C\C/C=C\C/C=C\CC	-0.233583	-0.58797	-0.451128	0.146566	0.00741417	0.0473768	IMPC_HWT_012_001___1 point	Heart Weight	Heart weight normalised against body weight	IMPC_HWT_012_001	20	20	20	20	significant	Different size	IMPC_HWT_012_001	_00119_110
37036	ONLI_0433	CSHPOS	1-acyl-sn-glycero-3-phosphocholines	LPC 18:1	YAMUFBLWGFFICM-PTGWMXDISA-N	16081932	CCCCCCCC/C=C\CCCCCCCC(=O)OC[C@H](COP(=O)([O-])OCC[N+](C)(C)C)O	-0.358161	-0.598496	-0.550376	0.02382	0.0062353	0.0132148	IMPC_HWT_012_001___1 point	Heart Weight	Heart weight normalised against body weight	IMPC_HWT_012_001	20	20	20	20	significant	Different size	IMPC_HWT_012_001	_00119_112
38620	ONLI_0450	CSHPOS	1-acyl-sn-glycero-3-phosphocholines	LPC 20:2	YYQVCMMXPIJVHY-ZOIJLGJPSA-N	52924053	CCCCC/C=C\C/C=C\CCCCCCCCCC(=O)OC[C@H](COP(=O)([O-])OCC[N+](C)(C)C)O	-0.293433	-0.499248	-0.56391	0.0664499	0.0265576	0.0108068	IMPC_HWT_012_001___1 point	Heart Weight	Heart weight normalised against body weight	IMPC_HWT_012_001	20	20	20	20	significant	Different size	IMPC_HWT_012_001	_00119_120
38730	ONLI_0451	CSHPOS	1-acyl-sn-glycero-3-phosphocholines	LPC 20:1	YYSFWGQAKJTHRE-MEOKJUQFSA-N	52924051	CCCCCCCC/C=C\CCCCCCCCCC(=O)OC[C@H](COP(=O)([O-])OCC[N+](C)(C)C)O	-0.129268	-0.606015	-0.52782	0.425245	0.00549153	0.0181883	IMPC_HWT_012_001___1 point	Heart Weight	Heart weight normalised against body weight	IMPC_HWT_012_001	20	20	20	20	significant	Different size	IMPC_HWT_012_001	_00119_121
41936	ONLI_0498	CSHNEG	1-(1Z-alkenyl)-glycero-3-phosphoethanolamines	LPE P-16:0	QYTPGOPLNFESQC-NUTQULCTSA-N	42607469	CCCCCCCCCCCCCC/C=C\OC[C@H](COP(=O)(O)OCCN)O	-0.313321	-0.508271	-0.517293	0.049457	0.0236359	0.0209784	IMPC_HWT_012_001___1 point	Heart Weight	Heart weight normalised against body weight	IMPC_HWT_012_001	20	20	20	20	significant	Different size	IMPC_HWT_012_001	_00119_134
42228	ONLI_0505	CSHNEG	1-acyl-sn-glycero-3-phosphoethanolamines	LPE 22:5	OSRWIBSZJTWIKA-SCFYABBUSA-N	53480955	CC/C=C\C/C=C\C/C=C\C/C=C\C/C=C\CCCCCC(=O)OC[C@H](COP(=O)(O)OCCN)O	-0.265666	-0.473684	-0.475188	0.0976259	0.0364322	0.0357808	IMPC_HWT_012_001___1 point	Heart Weight	Heart weight normalised against body weight	IMPC_HWT_012_001	20	20	20	20	significant	Different size	IMPC_HWT_012_001	_00119_137
42344	ONLI_0509	CSHNEG	1-acyl-sn-glycero-3-phosphocholines	LPC 16:0	ASWBNKHCZGQVJV-HSZRJFAPSA-N	460602	CCCCCCCCCCCCCCCC(=O)OC[C@H](COP(=O)([O-])OCC[N+](C)(C)C)O	-0.426454	-0.756391	-0.586466	0.00647242	0.000173236	0.00759661	IMPC_HWT_012_001___1 point	Heart Weight	Heart weight normalised against body weight	IMPC_HWT_012_001	20	20	20	20	significant	Different size	IMPC_HWT_012_001	_00119_138
43026	ONLI_0522	CSHNEG	1-acyl-sn-glycero-3-phosphocholines	LPC 20:5	PDIGSOAOQOXRDU-WJPZTBRDSA-N	11757087	CC/C=C\C/C=C\C/C=C\C/C=C\C/C=C\CCCC(=O)OC[C@H](COP(=O)([O-])OCC[N+](C)(C)C)O	-0.5803	-0.627068	-0.572932	0.000116174	0.00378742	0.0094108	IMPC_HWT_012_001___1 point	Heart Weight	Heart weight normalised against body weight	IMPC_HWT_012_001	20	20	20	20	significant	Different size	IMPC_HWT_012_001	_00119_141
43134	ONLI_0524	CSHNEG	1-acyl-sn-glycero-3-phosphocholines	LPC 20:3 a	BBNHCUBQEQJHIG-FZZJNMCHSA-N	52924055	CCCCC/C=C\C/C=C\C/C=C\CCCCCCC(=O)OC[C@H](COP(=O)([O-])OCC[N+](C)(C)C)O	-0.370732	-0.673684	-0.521805	0.0190815	0.00150847	0.0197431	IMPC_HWT_012_001___1 point	Heart Weight	Heart weight normalised against body weight	IMPC_HWT_012_001	20	20	20	20	significant	Different size	IMPC_HWT_012_001	_00119_142
43425	ONLI_0531	CSHNEG	1-acyl-sn-glycero-3-phosphocholines	LPC 22:5 a	YBUXFQUGNPBZPS-YNBHEIDWSA-N	53480473	CCCCC/C=C\C/C=C\C/C=C\C/C=C\C/C=C\CCC(=O)OC[C@H](COP(=O)([O-])OCC[N+](C)(C)C)O	-0.342402	-0.633083	-0.541353	0.0311205	0.00339037	0.0150505	IMPC_HWT_012_001___1 point	Heart Weight	Heart weight normalised against body weight	IMPC_HWT_012_001	20	20	20	20	significant	Different size	IMPC_HWT_012_001	_00119_145
50726	ONLI_0619	CSHNEG	Sphingomyelins	SM d40:3; SM d14:1/26:2;	FMJPKVXVBYILLP-FTRJIJDXSA-N	52931199	CCCCCCCC/C=C\CCCCCCCCCCCC(=O)N[C@@H](COP(=O)([O-])OCC[N+](C)(C)C)[C@@H](/C=C/CCCCCCCC/C=C\CCC)O	-0.160038	-0.603008	-0.487218	0.322689	0.00577973	0.0308957	IMPC_HWT_012_001___1 point	Heart Weight	Heart weight normalised against body weight	IMPC_HWT_012_001	20	20	20	20	significant	Different size	IMPC_HWT_012_001	_00119_173
52037	ONLI_0638	CSHNEG	Phosphatidylinositols	PI 36:4; PI 16:0-20:4;	VWRYMIZQLPXULA-ZLIQYQLMSA-N	53480053	CCCCCCCCCCCCCCCC(=O)OC[C@H](COP(=O)(O)OC1C([C@@H](C(C(C1O)O)O)O)O)OC(=O)CCCCCC/C=C\C/C=C\C/C=C\C/C=C\CC	-0.141088	-0.523308	-0.514286	0.383842	0.0193447	0.021836	IMPC_HWT_012_001___1 point	Heart Weight	Heart weight normalised against body weight	IMPC_HWT_012_001	20	20	20	20	significant	Different size	IMPC_HWT_012_001	_00119_178
52938	ONLI_0650	CSHNEG	Phosphatidylcholines	PC 38:5; PC 16:0-22:5;	ARDJUHDXABDVFH-ZHSIBHBUSA-N	24778737	CCCCCCCCCCCCCCCC(=O)OC[C@H](COP(=O)([O-])OCC[N+](C)(C)C)OC(=O)CCCCC/C=C\C/C=C\C/C=C\C/C=C\C/C=C\CC	-0.481238	-0.628571	-0.717293	0.00187897	0.00368474	0.000540681	IMPC_HWT_012_001___1 point	Heart Weight	Heart weight normalised against body weight	IMPC_HWT_012_001	20	20	20	20	significant	Different size	IMPC_HWT_012_001	_00119_182
53031	ONLI_0651	CSHNEG	Phosphatidylcholines	PC 38:5; PC 18:1-20:4;	SWOKEJBWARJLGN-ORKYUJCWSA-N	53478767	CCCCCCCC/C=C\CCCCCCCC(=O)OC[C@H](COP(=O)([O-])OCC[N+](C)(C)C)OC(=O)CCCCCC/C=C\C/C=C\C/C=C\C/C=C\CC	-0.32045	-0.487218	-0.475188	0.0443028	0.0308957	0.0357808	IMPC_HWT_012_001___1 point	Heart Weight	Heart weight normalised against body weight	IMPC_HWT_012_001	20	20	20	20	significant	Different size	IMPC_HWT_012_001	_00119_183
53534	ONLI_0657	CSHNEG	Phosphatidylcholines	PC 38:3	QXDDDGCNWRUEFM-UMKMFDOBSA-N	24778855	CCCCCCCCCCCCCCCCCC(=O)OC[C@H](COP(=O)([O-])OCC[N+](C)(C)C)OC(=O)CCC/C=C\C/C=C\C/C=C\CCCCCCCC	-0.439212	-0.816541	-0.580451	0.00493284	9.03085e-06	0.00836368	IMPC_HWT_012_001___1 point	Heart Weight	Heart weight normalised against body weight	IMPC_HWT_012_001	20	20	20	20	significant	Different size	IMPC_HWT_012_001	_00119_187
53635	ONLI_0658	CSHNEG	Phosphatidylcholines	PC 38:3; PC 18:0-20:3;	VGSUMLIRUGDCTF-NSMRCOLJSA-N	24778857	CCCCCCCCCCCCCCCCCC(=O)OC[C@H](COP(=O)([O-])OCC[N+](C)(C)C)OC(=O)CCCCCC/C=C\C/C=C\C/C=C\CCCCC	-0.439775	-0.815038	-0.580451	0.004873	1.03015e-05	0.00836368	IMPC_HWT_012_001___1 point	Heart Weight	Heart weight normalised against body weight	IMPC_HWT_012_001	20	20	20	20	significant	Different size	IMPC_HWT_012_001	_00119_188
54239	ONLI_0666	CSHNEG	Phosphatidylinositols	PI 38:6; PI 16:0-22:6;	FPHAZHKZJQOPBU-BYFJYSEFSA-N	52927464	CCCCCCCCCCCCCCCC(=O)OC[C@H](COP(=O)(O)OC1C([C@@H](C(C(C1O)O)O)O)O)OC(=O)CC/C=C\C/C=C\C/C=C\C/C=C\C/C=C\C/C=C\CC	-0.184053	-0.655639	-0.554887	0.254608	0.00219322	0.0123679	IMPC_HWT_012_001___1 point	Heart Weight	Heart weight normalised against body weight	IMPC_HWT_012_001	20	20	20	20	significant	Different size	IMPC_HWT_012_001	_00119_192
54643	ONLI_0670	CSHNEG	Phosphatidylinositols	PI 38:3; PI 18:0-20:3;	ZUGLBBVIAIBIKG-BZXCBJNASA-N	52928308	CCCCCCCCCCCCCCCCCC(=O)OC[C@H](COP(=O)(O)OC1C([C@@H](C(C(C1O)O)O)O)O)OC(=O)CCCCCC/C=C\C/C=C\C/C=C\CCCCC	-0.2	-0.684211	-0.663158	0.215181	0.00119796	0.00188218	IMPC_HWT_012_001___1 point	Heart Weight	Heart weight normalised against body weight	IMPC_HWT_012_001	20	20	20	20	significant	Different size	IMPC_HWT_012_001	_00119_195
55223	ONLI_0676	CSHNEG	Phosphatidylcholines	PC 40:4; PC 18:0-22:4;	QQIYXJBHMDYXHH-NMUBDWGHSA-N	52923573	CCCCC/C=C\C/C=C\CCCCCCCCCCCC(=O)OC[C@H](COP(=O)([O-])OCC[N+](C)(C)C)OC(=O)CCCCCCC/C=C\C/C=C\CCCCC	-0.663977	-0.765414	-0.670677	5.48725e-06	0.000127184	0.00160839	IMPC_HWT_012_001___1 point	Heart Weight	Heart weight normalised against body weight	IMPC_HWT_012_001	20	20	20	20	significant	Different size	IMPC_HWT_012_001	_00119_200
55439	ONLI_0679	CSHNEG	Phosphatidylinositols	PI 40:6; PI 18:0-22:6;	DJVOKHFQPGWUPK-PNBUVQRSSA-N	52927465	CCCCCCCCCCCCCCCCCC(=O)OC[C@H](COP(=O)(O)OC1C([C@@H](C(C(C1O)O)O)O)O)OC(=O)CC/C=C\C/C=C\C/C=C\C/C=C\C/C=C\C/C=C\CC	-0.328705	-0.669173	-0.559398	0.0388922	0.00166035	0.0115658	IMPC_HWT_012_001___1 point	Heart Weight	Heart weight normalised against body weight	IMPC_HWT_012_001	20	20	20	20	significant	Different size	IMPC_HWT_012_001	_00119_201
34019	ONLI_0402	CSHPOS	1-acyl-sn-glycero-3-phosphocholines	LPC 14:0	VXUOFDJKYGDUJI-OAQYLSRUSA-N	460604	CCCCCCCCCCCCCC(=O)OC[C@H](COP(=O)([O-])OCC[N+](C)(C)C)O	-0.391317	-0.634804	-0.556244	0.0207634	0.00747131	0.0182052	IMPC_HWT_999_999___1 point	Heart Weight	Heart weight normalised against tibia length	IMPC_HWT_999_999	20	20	17	18	significant	Different size	IMPC_HWT_999_999	_00120_91
34420	ONLI_0406	CSHPOS	Triacylglycerols	TAG 58:6; TAG 18:1-18:2-22:3;	WCIIIQSFALPOGU-CIRMXUQZSA-N	138286297	CCCCCC/C=C\CCCCCCCCCC(=O)OCC(COC(=O)CCCCCCCCCCC/C=C\C/C=C\C/C=C\CC)OC(=O)CCCCCCCC/C=C\C=C/CCCCC	0.0946779	-0.495098	-0.508772	0.587216	0.045363	0.0329351	IMPC_HWT_999_999___1 point	Heart Weight	Heart weight normalised against tibia length	IMPC_HWT_999_999	20	20	17	18	significant	Different size	IMPC_HWT_999_999	_00120_92
35435	ONLI_0416	CSHPOS	Phosphatidylcholines	PC34:1	WTJKGGKOPKCXLL-VYOBOKEXSA-N	5497103	CCCCCCCCCCCCCCCC(=O)OC[C@H](COP(=O)([O-])OCC[N+](C)(C)C)OC(=O)CCCCCCC/C=C\CCCCCCCC	0.328852	-0.583333	-0.48194	0.0542778	0.015739	0.0446757	IMPC_HWT_999_999___1 point	Heart Weight	Heart weight normalised against tibia length	IMPC_HWT_999_999	20	20	17	18	significant	Different size	IMPC_HWT_999_999	_00120_96
38621	ONLI_0450	CSHPOS	1-acyl-sn-glycero-3-phosphocholines	LPC 20:2	YYQVCMMXPIJVHY-ZOIJLGJPSA-N	52924053	CCCCC/C=C\C/C=C\CCCCCCCCCC(=O)OC[C@H](COP(=O)([O-])OCC[N+](C)(C)C)O	0.126331	-0.495098	-0.486068	0.468094	0.045363	0.0426843	IMPC_HWT_999_999___1 point	Heart Weight	Heart weight normalised against tibia length	IMPC_HWT_999_999	20	20	17	18	significant	Different size	IMPC_HWT_999_999	_00120_105
55023	ONLI_0674	CSHNEG	Phosphatidylcholines	PC 40:5; PC 18:0-22:5;	MAAMGQXOTCBPFS-JPGWWKBXSA-N	24778873	CCCCCCCCCCCCCCCCCC(=O)OC[C@H](COP(=O)([O-])OCC[N+](C)(C)C)OC(=O)CCCCC/C=C\C/C=C\C/C=C\C/C=C\C/C=C\CC	-0.187115	-0.507353	-0.479876	0.280602	0.0397044	0.0456981	IMPC_HWT_999_999___1 point	Heart Weight	Heart weight normalised against tibia length	IMPC_HWT_999_999	20	20	17	18	significant	Different size	IMPC_HWT_999_999	_00120_164
55224	ONLI_0676	CSHNEG	Phosphatidylcholines	PC 40:4; PC 18:0-22:4;	QQIYXJBHMDYXHH-NMUBDWGHSA-N	52923573	CCCCC/C=C\C/C=C\CCCCCCCCCCCC(=O)OC[C@H](COP(=O)([O-])OCC[N+](C)(C)C)OC(=O)CCCCCCC/C=C\C/C=C\CCCCC	-0.3493	-0.531863	-0.667699	0.040341	0.0300391	0.00318184	IMPC_HWT_999_999___1 point	Heart Weight	Heart weight normalised against tibia length	IMPC_HWT_999_999	20	20	17	18	significant	Different size	IMPC_HWT_999_999	_00120_165
62428	ONLI_0812	HILICPOS	Leucine and derivatives	N-Methylleucine	XJODGRWDFZVTKW-LURJTMIESA-N	2777993	CC(C)C[C@@H](C(=O)O)NC	0.248862	0.511046	0.549452	0.149413	0.0430652	0.0148178	IMPC_IPG_001_001___1 point	Intraperitoneal glucose tolerance test (IPGTT)	Body Weight	IMPC_IPG_001_001	20	20	16	19	significant	Different size	IMPC_IPG_001_001	_00121_196
25517	ONLI_0314	CSHPOS	Cholesteryl esters	CE (18:2)	NAACPBBQTFFYQB-XHDSEGDBSA-N	131801653	CCCCC/C=C\C/C=C\CCCCCCCC(=O)O[C@H]1CC[C@@]2(C3CC[C@]4(C(C3CC=C2C1)CCC4[C@H](C)CCCC(C)C)C)C	0.553335	0.609025	0.494076	0.000565241	0.0122785	0.0315445	IMPC_IPG_002_001___0	Intraperitoneal glucose tolerance test (IPGTT)	Blood glucose concentration	IMPC_IPG_002_001.0	20	20	16	19	significant	Different size	IMPC_IPG_002_001.0	_00122_98
5900	ONLI_0006	gctof	Xanthines	uric acid	LEHOTFFKMJEONL-UHFFFAOYSA-N	1175	C12=C(NC(=O)N1)NC(=O)NC2=O	-0.558486	-0.561833	-0.503313	0.000489103	0.0235164	0.0280368	IMPC_IPG_002_001___120	Intraperitoneal glucose tolerance test (IPGTT)	Blood glucose concentration	IMPC_IPG_002_001.120	20	20	16	19	significant	Different size	IMPC_IPG_002_001.120	_00123_1
61022	ONLI_0791	HILICPOS	Guanidines	3-Guanidinopropionic acid	KMXXSJLYVJEBHI-UHFFFAOYSA-N	67701	C(CN=C(N)N)C(=O)O	-0.0968805	-0.61993	-0.483064	0.579823	0.0104182	0.0361625	IMPC_IPG_002_001___120	Intraperitoneal glucose tolerance test (IPGTT)	Blood glucose concentration	IMPC_IPG_002_001.120	20	20	16	19	significant	Different size	IMPC_IPG_002_001.120	_00123_183
64822	ONLI_0846	HILICPOS	Alpha amino acids and derivatives	Creatine	CVSVTCORWBXHQV-UHFFFAOYSA-N	586	CN(CC(=O)O)C(=N)N	-0.0968805	-0.61993	-0.483064	0.579823	0.0104182	0.0361625	IMPC_IPG_002_001___120	Intraperitoneal glucose tolerance test (IPGTT)	Blood glucose concentration	IMPC_IPG_002_001.120	20	20	16	19	significant	Different size	IMPC_IPG_002_001.120	_00123_193
68232	ONLI_0889	HILICPOS	5'-deoxy-5'-thionucleosides	S-Adenosyl-homocysteine	ZJUKTBDSGOFHSH-WFMPWKQPSA-N	439155	C1=NC(=C2C(=N1)N(C=N2)[C@H]3[C@@H]([C@@H]([C@H](O3)CSCC[C@@H](C(=O)O)N)O)O)N	-0.39342	-0.579014	-0.589682	0.0285525	0.0300328	0.0127251	IMPC_IPG_002_001___120	Intraperitoneal glucose tolerance test (IPGTT)	Blood glucose concentration	IMPC_IPG_002_001.120	16	18	16	19	significant	Different size	IMPC_IPG_002_001.120	_00123_212
74626	ONLI_1098	BileAcid_Steroids	Glycinated bile acids and derivatives	Glycoursodeoxycholic acid	GHCZAUBVMUEKKP-XROMFQGDSA-N	12310288	C[C@H](CCC(=O)NCC(=O)O)[C@H]1CC[C@@H]2[C@@]1(CC[C@H]3[C@H]2[C@H](C[C@H]4[C@@]3(CC[C@H](C4)O)C)O)C	-0.610586	-0.519561	-0.644966	9.81208e-05	0.0391451	0.00286721	IMPC_IPG_002_001___120	Intraperitoneal glucose tolerance test (IPGTT)	Blood glucose concentration	IMPC_IPG_002_001.120	20	20	16	19	significant	Different size	IMPC_IPG_002_001.120	_00123_228
18135	ONLI_0023	gctof	Pentoses	ribose	HMFHBZSHGGEWLO-SOOFDHNKSA-N	5779	C([C@@H]1[C@H]([C@H](C(O1)O)O)O)O	-0.551951	-0.597498	-0.459851	0.000587414	0.0145184	0.0475975	IMPC_IPG_002_001___15	Intraperitoneal glucose tolerance test (IPGTT)	Blood glucose concentration	IMPC_IPG_002_001.15	20	20	16	19	significant	Different size	IMPC_IPG_002_001.15	_00124_7
23124	ONLI_0028	gctof	Nucleoside and nucleotide analogues	pseudo uridine	PTJWIQPHWPFNBW-GBNDHIKLSA-N	15047	C1=C(C(=O)NC(=O)N1)[C@H]2[C@@H]([C@@H]([C@H](O2)CO)O)O	-0.640931	-0.557763	-0.69943	3.35488e-05	0.0247672	0.000859505	IMPC_IPG_002_001___15	Intraperitoneal glucose tolerance test (IPGTT)	Blood glucose concentration	IMPC_IPG_002_001.15	20	20	16	19	significant	Different size	IMPC_IPG_002_001.15	_00124_8
41139	ONLI_0050	gctof	O-glycosyl compounds	maltose	GUBGYTABKSRVRQ-DKBJLJRDSA-N	10991489	C([C@@H]1[C@H]([C@@H]([C@H]([C@H](O1)O[C@@H]2[C@H](O[C@@H]([C@H]([C@H]2O)O)O)CO)O)O)O)O	-0.410846	-0.623988	-0.47477	0.0142197	0.00978567	0.0399734	IMPC_IPG_002_001___15	Intraperitoneal glucose tolerance test (IPGTT)	Blood glucose concentration	IMPC_IPG_002_001.15	20	20	16	19	significant	Different size	IMPC_IPG_002_001.15	_00124_13
9653	ONLI_0116	gctof	Tryptamines and derivatives	5-methoxytryptamine	JTEJPPKMYBDEMY-UHFFFAOYSA-N	1833	COC1=CC2=C(C=C1)NC=C2CCN	-0.693477	-0.64312	-0.725757	3.86649e-06	0.00719969	0.00043582	IMPC_IPG_002_001___15	Intraperitoneal glucose tolerance test (IPGTT)	Blood glucose concentration	IMPC_IPG_002_001.15	20	20	16	19	significant	Different size	IMPC_IPG_002_001.15	_00124_31
58738	ONLI_0750	HILICPOS	Dipeptides	Lys-Val	YQAIUOWPSUOINN-UHFFFAOYSA-N	140709	CC(C)C(C(=O)O)NC(=O)C(CCCCN)N	-0.578575	-0.654893	-0.596753	0.000271828	0.00590069	0.00699122	IMPC_IPG_002_001___15	Intraperitoneal glucose tolerance test (IPGTT)	Blood glucose concentration	IMPC_IPG_002_001.15	20	20	16	19	significant	Different size	IMPC_IPG_002_001.15	_00124_139
60827	ONLI_0788	HILICPOS	Purine nucleosides	1-Methyladenosine	GFYLSDSUCHVORB-IOSLPCCCSA-N	27476	CN1C=NC2=C(C1=N)N=CN2[C@H]3[C@@H]([C@@H]([C@H](O3)CO)O)O	-0.549009	-0.569537	-0.473892	0.000637137	0.0212825	0.040394	IMPC_IPG_002_001___15	Intraperitoneal glucose tolerance test (IPGTT)	Blood glucose concentration	IMPC_IPG_002_001.15	20	20	16	19	significant	Different size	IMPC_IPG_002_001.15	_00124_144
61241	ONLI_0793	HILICPOS	Proline and derivatives	3-Hydroxyproline	BJBUEDPLEOHJGE-BKLSDQPFSA-N	150779	C1CN[C@@H](C1O)C(=O)O	-0.146851	-0.788816	-0.574814	0.399896	0.000281484	0.0100405	IMPC_IPG_002_001___15	Intraperitoneal glucose tolerance test (IPGTT)	Blood glucose concentration	IMPC_IPG_002_001.15	20	20	16	19	significant	Different size	IMPC_IPG_002_001.15	_00124_147
67910	ONLI_0886	HILICPOS	Dipeptides	Proline-hydroxyproline	ONPXCLZMBSJLSP-CSMHCCOUSA-N	11902892	C1C[C@H]([NH2+]C1)C(=O)N2C[C@@H](C[C@H]2C(=O)[O-])O	-0.450221	-0.569537	-0.482668	0.00665059	0.0212825	0.0363379	IMPC_IPG_002_001___15	Intraperitoneal glucose tolerance test (IPGTT)	Blood glucose concentration	IMPC_IPG_002_001.15	20	20	16	19	significant	Different size	IMPC_IPG_002_001.15	_00124_167
23125	ONLI_0028	gctof	Nucleoside and nucleotide analogues	pseudo uridine	PTJWIQPHWPFNBW-GBNDHIKLSA-N	15047	C1=C(C(=O)NC(=O)N1)[C@H]2[C@@H]([C@@H]([C@H](O2)CO)O)O	-0.547314	-0.650958	-0.479158	0.000667437	0.00631216	0.0379207	IMPC_IPG_002_001___30	Intraperitoneal glucose tolerance test (IPGTT)	Blood glucose concentration	IMPC_IPG_002_001.30	20	20	16	19	significant	Different size	IMPC_IPG_002_001.30	_00125_7
61242	ONLI_0793	HILICPOS	Proline and derivatives	3-Hydroxyproline	BJBUEDPLEOHJGE-BKLSDQPFSA-N	150779	C1CN[C@@H](C1O)C(=O)O	0.249772	-0.776142	-0.556384	0.14788	0.000408141	0.0133614	IMPC_IPG_002_001___30	Intraperitoneal glucose tolerance test (IPGTT)	Blood glucose concentration	IMPC_IPG_002_001.30	20	20	16	19	significant	Different size	IMPC_IPG_002_001.30	_00125_137
60829	ONLI_0788	HILICPOS	Purine nucleosides	1-Methyladenosine	GFYLSDSUCHVORB-IOSLPCCCSA-N	27476	CN1C=NC2=C(C1=N)N=CN2[C@H]3[C@@H]([C@@H]([C@H](O3)CO)O)O	-0.609566	-0.576471	-0.486178	0.000101529	0.0215634	0.0348068	IMPC_IPG_002_001___60	Intraperitoneal glucose tolerance test (IPGTT)	Blood glucose concentration	IMPC_IPG_002_001.60	20	20	16	19	significant	Different size	IMPC_IPG_002_001.60	_00126_154
61243	ONLI_0793	HILICPOS	Proline and derivatives	3-Hydroxyproline	BJBUEDPLEOHJGE-BKLSDQPFSA-N	150779	C1CN[C@@H](C1O)C(=O)O	0.371315	-0.811765	-0.47477	0.0280824	0.000194873	0.0399734	IMPC_IPG_002_001___60	Intraperitoneal glucose tolerance test (IPGTT)	Blood glucose concentration	IMPC_IPG_002_001.60	20	20	16	19	significant	Different size	IMPC_IPG_002_001.60	_00126_156
74817	ONLI_1102	BileAcid_Steroids	Trihydroxy bile acids, alcohols and derivatives	ÃŸ-Muricholic acid	DKPMWHFRUGMUKF-CRKPLTDNSA-N	5283853	C[C@H](CCC(=O)O)[C@H]1CC[C@@H]2[C@@]1(CC[C@H]3[C@H]2[C@H]([C@H]([C@H]4[C@@]3(CC[C@H](C4)O)C)O)O)C	-0.564848	-0.56044	-0.516556	0.00141118	0.0498861	0.0404963	IMPC_IPG_002_001___60	Intraperitoneal glucose tolerance test (IPGTT)	Blood glucose concentration	IMPC_IPG_002_001.60	15	17	16	19	significant	Different size	IMPC_IPG_002_001.60	_00126_184
25519	ONLI_0314	CSHPOS	Cholesteryl esters	CE (18:2)	NAACPBBQTFFYQB-XHDSEGDBSA-N	131801653	CCCCC/C=C\C/C=C\CCCCCCCC(=O)O[C@H]1CC[C@@]2(C3CC[C@]4(C(C3CC=C2C1)CCC4[C@H](C)CCCC(C)C)C)C	0.553335	0.609025	0.494076	0.000565241	0.0122785	0.0315445	IMPC_IPG_010_001___1 point	Intraperitoneal glucose tolerance test (IPGTT)	Fasted blood glucose concentration	IMPC_IPG_010_001	20	20	16	19	significant	Different size	IMPC_IPG_010_001	_00127_98
23127	ONLI_0028	gctof	Nucleoside and nucleotide analogues	pseudo uridine	PTJWIQPHWPFNBW-GBNDHIKLSA-N	15047	C1=C(C(=O)NC(=O)N1)[C@H]2[C@@H]([C@@H]([C@H](O2)CO)O)O	-0.590782	-0.503311	-0.655551	0.000186648	0.0468747	0.00231045	IMPC_IPG_011_001___1 point	Intraperitoneal glucose tolerance test (IPGTT)	Initial response to glucose challenge	IMPC_IPG_011_001	20	20	16	19	significant	Different size	IMPC_IPG_011_001	_00128_8
41145	ONLI_0050	gctof	O-glycosyl compounds	maltose	GUBGYTABKSRVRQ-DKBJLJRDSA-N	10991489	C([C@@H]1[C@H]([C@@H]([C@H]([C@H](O1)O[C@@H]2[C@H](O[C@@H]([C@H]([C@H]2O)O)O)CO)O)O)O)O	-0.500981	-0.650478	-0.504607	0.00217362	0.00636382	0.0275708	IMPC_IPG_011_001___1 point	Intraperitoneal glucose tolerance test (IPGTT)	Initial response to glucose challenge	IMPC_IPG_011_001	20	20	16	19	significant	Different size	IMPC_IPG_011_001	_00128_12
8431	ONLI_0100	gctof	Tricarboxylic acids and derivatives	citric acid	KRKNYBCHXYNGOX-UHFFFAOYSA-N	311	C(C(=O)O)C(CC(=O)O)(C(=O)O)O	-0.538806	-0.612215	-0.494076	0.000839663	0.0117093	0.0315445	IMPC_IPG_011_001___1 point	Intraperitoneal glucose tolerance test (IPGTT)	Initial response to glucose challenge	IMPC_IPG_011_001	20	20	16	19	significant	Different size	IMPC_IPG_011_001	_00128_26
9656	ONLI_0116	gctof	Tryptamines and derivatives	5-methoxytryptamine	JTEJPPKMYBDEMY-UHFFFAOYSA-N	1833	COC1=CC2=C(C=C1)NC=C2CCN	-0.650462	-0.631347	-0.664327	2.33734e-05	0.00871631	0.00191981	IMPC_IPG_011_001___1 point	Intraperitoneal glucose tolerance test (IPGTT)	Initial response to glucose challenge	IMPC_IPG_011_001	20	20	16	19	significant	Different size	IMPC_IPG_011_001	_00128_28
18226	ONLI_0233	CSHPOS	Triacylglycerols	TAG 58:10; TAG 18:2-18:2-22:6;	YNVHIDISXOPRLL-VOUXIQFDSA-N	131750599	CCCCC/C=C\C/C=C\CCCCCCCC(=O)OC[C@@H](COC(=O)CC/C=C\C/C=C\C/C=C\C/C=C\C/C=C\C/C=C\CC)OC(=O)CCCCCCC/C=C\C/C=C\CCCCC	-0.545811	-0.544518	-0.485301	0.000695364	0.0291937	0.0351848	IMPC_IPG_011_001___1 point	Intraperitoneal glucose tolerance test (IPGTT)	Initial response to glucose challenge	IMPC_IPG_011_001	20	20	16	19	significant	Different size	IMPC_IPG_011_001	_00128_35
27019	ONLI_0329	CSHPOS	Triacylglycerols	TAG 56:8; TAG 16:1-18:1-22:6;	OBEVBHFXQRTJAZ-AAMJSBRJSA-N	131759453	CCCCCC/C=C\CCCCCCCCCC(=O)O[C@@H](COC(=O)CCCCCCC/C=C\CCCCCC)COC(=O)CC/C=C\C/C=C\C/C=C\C/C=C\C/C=C\C/C=C\CC	-0.436817	-0.550405	-0.50724	0.00869904	0.0271575	0.0266415	IMPC_IPG_011_001___1 point	Intraperitoneal glucose tolerance test (IPGTT)	Initial response to glucose challenge	IMPC_IPG_011_001	20	20	16	19	significant	Different size	IMPC_IPG_011_001	_00128_46
28814	ONLI_0347	CSHPOS	Triacylglycerols	TAG 58:9; TAG 18:1-18:2-22:6;	NWOHTDXNYMHGGE-HAXGSABZSA-N	131760203	CCCCCC/C=C\CCCCCCCCCC(=O)OC[C@@H](COC(=O)CC/C=C\C/C=C\C/C=C\C/C=C\C/C=C\C/C=C\CC)OC(=O)CCCCCCC/C=C\C/C=C\CCCCC	-0.554357	-0.504783	-0.543221	0.000549354	0.0461312	0.0162327	IMPC_IPG_011_001___1 point	Intraperitoneal glucose tolerance test (IPGTT)	Initial response to glucose challenge	IMPC_IPG_011_001	20	20	16	19	significant	Different size	IMPC_IPG_011_001	_00128_48
29617	ONLI_0355	CSHPOS	Acyl carnitines	AC 20:4;	RBFQHRALHSUPIA-JTPUQHSZSA-N	136212424	CCCCC/C=C\C/C=C\C/C=C\C/C=C\CCCC(=O)O[C@H](CC(=O)[O-])C[N+](C)(C)C	-0.446484	-0.525386	-0.513383	0.00717517	0.0366221	0.0245684	IMPC_IPG_011_001___1 point	Intraperitoneal glucose tolerance test (IPGTT)	Initial response to glucose challenge	IMPC_IPG_011_001	20	20	16	19	significant	Different size	IMPC_IPG_011_001	_00128_49
41340	ONLI_0492	CSHNEG	Very long-chain fatty acids	FA 22:2	HVGRZDASOHMCSK-HZJYTTRNSA-N	5312554	CCCCC/C=C\C/C=C\CCCCCCCCCCCC(=O)O	-0.215747	-0.497425	-0.75735	0.213227	0.0499383	0.000173362	IMPC_IPG_011_001___1 point	Intraperitoneal glucose tolerance test (IPGTT)	Initial response to glucose challenge	IMPC_IPG_011_001	20	20	16	19	significant	Different size	IMPC_IPG_011_001	_00128_76
58741	ONLI_0750	HILICPOS	Dipeptides	Lys-Val	YQAIUOWPSUOINN-UHFFFAOYSA-N	140709	CC(C)C(C(=O)O)NC(=O)C(CCCCN)N	-0.542169	-0.59014	-0.489689	0.000767394	0.0161072	0.0333261	IMPC_IPG_011_001___1 point	Intraperitoneal glucose tolerance test (IPGTT)	Initial response to glucose challenge	IMPC_IPG_011_001	20	20	16	19	significant	Different size	IMPC_IPG_011_001	_00128_93
60830	ONLI_0788	HILICPOS	Purine nucleosides	1-Methyladenosine	GFYLSDSUCHVORB-IOSLPCCCSA-N	27476	CN1C=NC2=C(C1=N)N=CN2[C@H]3[C@@H]([C@@H]([C@H](O3)CO)O)O	-0.513449	-0.516556	-0.540588	0.00160779	0.0404963	0.0168619	IMPC_IPG_011_001___1 point	Intraperitoneal glucose tolerance test (IPGTT)	Initial response to glucose challenge	IMPC_IPG_011_001	20	20	16	19	significant	Different size	IMPC_IPG_011_001	_00128_95
61244	ONLI_0793	HILICPOS	Proline and derivatives	3-Hydroxyproline	BJBUEDPLEOHJGE-BKLSDQPFSA-N	150779	C1CN[C@@H](C1O)C(=O)O	-0.17694	-0.668139	-0.471259	0.309235	0.00467035	0.0416762	IMPC_IPG_011_001___1 point	Intraperitoneal glucose tolerance test (IPGTT)	Initial response to glucose challenge	IMPC_IPG_011_001	20	20	16	19	significant	Different size	IMPC_IPG_011_001	_00128_97
8432	ONLI_0100	gctof	Tricarboxylic acids and derivatives	citric acid	KRKNYBCHXYNGOX-UHFFFAOYSA-N	311	C(C(=O)O)C(CC(=O)O)(C(=O)O)O	-0.442017	-0.544118	-0.568421	0.00837201	0.031638	0.0124753	IMPC_IPG_012_001___1 point	Intraperitoneal glucose tolerance test (IPGTT)	Area under glucose response curve	IMPC_IPG_012_001	20	20	16	19	significant	Different size	IMPC_IPG_012_001	_00129_16
60831	ONLI_0788	HILICPOS	Purine nucleosides	1-Methyladenosine	GFYLSDSUCHVORB-IOSLPCCCSA-N	27476	CN1C=NC2=C(C1=N)N=CN2[C@H]3[C@@H]([C@@H]([C@H](O3)CO)O)O	-0.623249	-0.514706	-0.536842	9.03602e-05	0.0436611	0.0193634	IMPC_IPG_012_001___1 point	Intraperitoneal glucose tolerance test (IPGTT)	Area under glucose response curve	IMPC_IPG_012_001	20	20	16	19	significant	Different size	IMPC_IPG_012_001	_00129_140
53106	ONLI_0064	gctof	Purine nucleosides	inosine	UGQMRVRMYYASKQ-KQYNXXCUSA-N	135398641	C1=NC2=C(C(=O)N1)N=CN2[C@H]3[C@@H]([C@@H]([C@H](O3)CO)O)O	0.446196	0.590448	0.553383	0.00390371	0.00612726	0.0126451	IMPC_OFD_001_001___10	Open Field	Whole arena resting time series	IMPC_OFD_001_001.10	20	20	20	20	significant	Different size	IMPC_OFD_001_001.10	_00130_5
72326	ONLI_1017	HILICNEG	Tyrosine and derivatives	N-Acetyl-L-tyrosine	CAHKINHBCWCHCF-JTQLQIEISA-N	68310	CC(=O)N[C@@H](CC1=CC=C(C=C1)O)C(=O)O	-0.478138	-0.482707	-0.559649	0.00232474	0.0326611	0.0141488	IMPC_OFD_001_001___10	Open Field	Whole arena resting time series	IMPC_OFD_001_001.10	20	19	20	20	significant	Different size	IMPC_OFD_001_001.10	_00130_139
29042	ONLI_0349	CSHPOS	1-alkyl,2-acylglycero-3-phosphocholines	PC 38:6e; PC 16:0e/22:6;	QQQQNYAHSSIZBU-HIQXTUQZSA-N	16759366	CCCCCCCCCCCCCCCCOC[C@H](COP(=O)([O-])OCC[N+](C)(C)C)OC(=O)CC/C=C\C/C=C\C/C=C\C/C=C\C/C=C\C/C=C\CC	-0.379174	-0.628571	-0.470677	0.0163685	0.00368474	0.037763	IMPC_OFD_001_001___15	Open Field	Whole arena resting time series	IMPC_OFD_001_001.15	20	20	20	20	significant	Different size	IMPC_OFD_001_001.15	_00131_24
45743	ONLI_0562	CSHNEG	1-(1Z-alkenyl),2-acylglycerophosphoethanolamines	PE 38:7e; PE 16:1e/22:6; [M-H]-	WVGALBKSWOUIEZ-XNHMFJFDSA-N	5283497	CCCCCCCCCCCCCC/C=C\OC[C@H](COP(=O)(O)OCCN)OC(=O)CC/C=C\C/C=C\C/C=C\C/C=C\C/C=C\C/C=C\CC	-0.270732	-0.541353	-0.446617	0.0912224	0.0150505	0.0498458	IMPC_OFD_001_001___15	Open Field	Whole arena resting time series	IMPC_OFD_001_001.15	20	20	20	20	significant	Different size	IMPC_OFD_001_001.15	_00131_44
72327	ONLI_1017	HILICNEG	Tyrosine and derivatives	N-Acetyl-L-tyrosine	CAHKINHBCWCHCF-JTQLQIEISA-N	68310	CC(=O)N[C@@H](CC1=CC=C(C=C1)O)C(=O)O	-0.541093	-0.469173	-0.585965	0.000460279	0.0384427	0.00960858	IMPC_OFD_001_001___15	Open Field	Whole arena resting time series	IMPC_OFD_001_001.15	20	19	20	20	significant	Different size	IMPC_OFD_001_001.15	_00131_83
57628	ONLI_0733	HILICPOS	Glycerophosphocholines	Glycerophosphocholine	SUHOQUVVVLNYQR-QMMMGPOBSA-N	71920	C[N+](C)(C)CCOP(=O)([O-])OC[C@H](CO)O	-0.503189	-0.452632	-0.502256	0.00108337	0.0465754	0.0255532	IMPC_OFD_001_001___5	Open Field	Whole arena resting time series	IMPC_OFD_001_001.5	20	20	20	20	significant	Different size	IMPC_OFD_001_001.5	_00133_40
60433	ONLI_0776	HILICPOS	Dipeptides	Thr-Ala	VPZKQTYZIVOJDV-UHFFFAOYSA-N	18218243	CC(C(C(=O)NC(C)C(=O)O)N)O	-0.333959	-0.481203	-0.530827	0.0357411	0.0332671	0.0174489	IMPC_OFD_001_001___5	Open Field	Whole arena resting time series	IMPC_OFD_001_001.5	20	20	20	20	significant	Different size	IMPC_OFD_001_001.5	_00133_42
25148	ONLI_0310	CSHPOS	Lineolic acids and derivatives	DAG 36:4; DAG 18:2-18:2;	MQGBAQLIFKSMEM-ZHARMHCNSA-N	9543729	CCCCC/C=C\C/C=C\CCCCCCCC(=O)OC[C@H](CO)OC(=O)CCCCCCC/C=C\C/C=C\CCCCC	0.300858	0.451128	0.46015	0.0592376	0.0473768	0.0427264	IMPC_OFD_002_001___10	Open Field	Whole arena average speed series	IMPC_OFD_002_001.10	20	20	20	20	significant	Different size	IMPC_OFD_002_001.10	_00134_26
27840	ONLI_0337	CSHPOS	Lineolic acids and derivatives	DAG 36:5; DAG 18:2-18:3;	PGXBELQFNRPKBC-WBVIKXMWSA-N	9543737	CCCCC/C=C\C/C=C\CCCCCCCC(=O)OC[C@H](CO)OC(=O)CCCCCCC/C=C\C/C=C\C/C=C\CC	0.379943	0.615038	0.473684	0.0155962	0.00469707	0.0364322	IMPC_OFD_002_001___10	Open Field	Whole arena average speed series	IMPC_OFD_002_001.10	20	20	20	20	significant	Different size	IMPC_OFD_002_001.10	_00134_30
12926	ONLI_0177	CSHPOS	Lineolic acids and derivatives	DAG 36:3; DAG 18:1-18:2;	BLZVZPYMHLXLHG-JOBMVARSSA-N	9543722	CCCCCCCC/C=C\CCCCCCCC(=O)OC[C@H](CO)OC(=O)CCCCCCC/C=C\C/C=C\CCCCC	0.365419	0.450545	0.472358	0.0204137	0.046199	0.0354636	IMPC_OFD_002_001___20	Open Field	Whole arena average speed series	IMPC_OFD_002_001.20	20	20	20	20	significant	Different size	IMPC_OFD_002_001.20	_00136_24
19720	ONLI_0250	CSHPOS	Triacylglycerols	TAG 48:4; TAG 12:0-18:1-18:3;	0	NA	0	0.441317	0.485145	0.545318	0.00436403	0.0301423	0.0128917	IMPC_OFD_002_001___20	Open Field	Whole arena average speed series	IMPC_OFD_002_001.20	20	20	20	20	significant	Different size	IMPC_OFD_002_001.20	_00136_45
21229	ONLI_0266	CSHPOS	Triacylglycerols	TAG 49:3; TAG 15:0-16:1-18:2;	CQSXCZMDDSQLAG-RLFYQNGLSA-N	131754333	CCCCCCCCCCCCCCC(=O)OC[C@@H](COC(=O)CCCCCCC/C=C\C/C=C\CCCCC)OC(=O)CCCCCCC/C=C\CCCCCC	0.179186	0.501317	0.479128	0.275065	0.0287677	0.0325623	IMPC_OFD_002_001___5	Open Field	Whole arena average speed series	IMPC_OFD_002_001.5	19	20	20	20	significant	Different size	IMPC_OFD_002_001.5	_00137_34
43923	ONLI_0539	CSHNEG	Phosphatidylcholines	PC 25:0; PC 12:0-13:0;	FCTBVSCBBWKZML-WJOKGBTCSA-N	24778516	CCCCCCCCCCCCC(=O)O[C@H](COC(=O)CCCCCCCCCCC)COP(=O)([O-])OCC[N+](C)(C)C	-0.504504	-0.498871	-0.472358	0.00090157	0.025149	0.0354636	IMPC_OFD_002_001___5	Open Field	Whole arena average speed series	IMPC_OFD_002_001.5	20	20	20	20	significant	Different size	IMPC_OFD_002_001.5	_00137_66
72332	ONLI_1017	HILICNEG	Tyrosine and derivatives	N-Acetyl-L-tyrosine	CAHKINHBCWCHCF-JTQLQIEISA-N	68310	CC(=O)N[C@@H](CC1=CC=C(C=C1)O)C(=O)O	0.471249	0.445448	0.490566	0.00246069	0.0490344	0.0329637	IMPC_OFD_002_001___5	Open Field	Whole arena average speed series	IMPC_OFD_002_001.5	20	19	20	20	significant	Different size	IMPC_OFD_002_001.5	_00137_97
72437	ONLI_1021	HILICNEG	L-alpha-amino acids	N-epsilon-Acetyllysine	DTERQYGMUDWYAZ-ZETCQYMHSA-N	92832	CC(=O)NCCCC[C@@H](C(=O)O)N	0.519943	0.550038	0.462484	0.000692522	0.0119827	0.0461773	IMPC_OFD_002_001___5	Open Field	Whole arena average speed series	IMPC_OFD_002_001.5	20	19	20	20	significant	Different size	IMPC_OFD_002_001.5	_00137_98
10941	ONLI_0155	CSHPOS	Phosphosphingolipids	SM d38:1	AADLTHQNYQJHQV-SVLGDMRNSA-N	44260124	CCCCCCCCCCCCCCCCCCCC(=O)N[C@@H](COP(=O)([O-])OCC[N+](C)(C)C)[C@@H](/C=C/CCCCCCCCCCCCC)O	0.388368	0.541353	0.514286	0.0137942	0.0150505	0.021836	IMPC_OFD_003_001___10	Open Field	Periphery distance travelled series	IMPC_OFD_003_001.10	20	20	20	20	significant	Different size	IMPC_OFD_003_001.10	_00138_7
16851	ONLI_0218	CSHPOS	Phosphocholines	SMd40:2 A	FOULCGVQZYQEQM-DNXGLLHMSA-O	52931202	CCCCCCCCCCC/C=C/[C@H]([C@H](COP(=O)(O)OCC[N+](C)(C)C)NC(=O)CCCCCCCCCCCCC/C=C\CCCCCCCC)O	0.294747	0.609023	0.712782	0.0652003	0.00521528	0.000607059	IMPC_OFD_003_001___10	Open Field	Periphery distance travelled series	IMPC_OFD_003_001.10	20	20	20	20	significant	Different size	IMPC_OFD_003_001.10	_00138_32
24535	ONLI_0302	CSHPOS	Sphingomyelins	SMd38:2	MDRFMTLYKHBJTF-NQYLGBTJSA-N	52931179	CCCCCCCCCCCCC/C=C/[C@H]([C@H](COP(=O)([O-])OCC[N+](C)(C)C)NC(=O)CCCCCCCCC/C=C\CCCCCCCC)O	0.35122	0.601504	0.682707	0.0268357	0.00592843	0.00123879	IMPC_OFD_003_001___10	Open Field	Periphery distance travelled series	IMPC_OFD_003_001.10	20	20	20	20	significant	Different size	IMPC_OFD_003_001.10	_00138_75
25732	ONLI_0316	CSHPOS	Phosphosphingolipids	SMd36:2	NBEADXWAAWCCDG-QDDWGVBQSA-N	6443882	CCCCCCCCCCCCC/C=C/[C@H]([C@H](COP(=O)([O-])OCC[N+](C)(C)C)NC(=O)CCCCCCC/C=C\CCCCCCCC)O	0.353283	0.521805	0.559398	0.0259075	0.0197431	0.0115658	IMPC_OFD_003_001___10	Open Field	Periphery distance travelled series	IMPC_OFD_003_001.10	20	20	20	20	significant	Different size	IMPC_OFD_003_001.10	_00138_85
30628	ONLI_0366	CSHPOS	Phosphosphingolipids	SMd34:1	RWKUXQNLWDTSLO-GWQJGLRPSA-O	5283590	CCCCCCCCCCCCCCCC(=O)N[C@@H](COP(=O)(O)OCC[N+](C)(C)C)[C@@H](/C=C/CCCCCCCCCCCCC)O	0.567355	0.666165	0.639098	0.000175205	0.00176841	0.0030283	IMPC_OFD_003_001___10	Open Field	Periphery distance travelled series	IMPC_OFD_003_001.10	20	20	20	20	significant	Different size	IMPC_OFD_003_001.10	_00138_109
36646	ONLI_0428	CSHPOS	1-acyl,2-(1Z-alkenyl)-glycerophosphocholines	PCo-40:7 A	XUVCLJCZWPTAIO-OAKHYACESA-N	53479405	CCCCCCCC/C=C\CCCCCC/C=C\OC(COC(=O)CCCCC/C=C\C/C=C\C/C=C\C/C=C\C/C=C\CC)COP(=O)([O-])OCC[N+](C)(C)C	0.296998	0.47218	0.628571	0.0631019	0.0370929	0.00368474	IMPC_OFD_003_001___10	Open Field	Periphery distance travelled series	IMPC_OFD_003_001.10	20	20	20	20	significant	Different size	IMPC_OFD_003_001.10	_00138_134
37630	ONLI_0439	CSHPOS	1-alkyl,2-acylglycero-3-phosphocholines	PC 16:0/o-20:5	YHSSHPWVFALMBA-IARQOZKNSA-N	10485310	CCCCCCCCCCCCCCCCOC[C@H](COP(=O)([O-])OCC[N+](C)(C)C)OC(=O)CCC/C=C\C/C=C\C/C=C\C/C=C\C/C=C\CC	0.419137	0.463158	0.499248	0.00753165	0.0412588	0.0265576	IMPC_OFD_003_001___10	Open Field	Periphery distance travelled series	IMPC_OFD_003_001.10	20	20	20	20	significant	Different size	IMPC_OFD_003_001.10	_00138_144
37751	ONLI_0440	CSHPOS	Phosphosphingolipids	SMd34:2	OAHFTKWSJGVMTG-MBIABJCFSA-N	52931145	CCCCCCCCCCCCC/C=C/[C@H]([C@H](COP(=O)([O-])OCC[N+](C)(C)C)NC(=O)CCCCCCC/C=C\CCCCCC)O	0.319137	0.562406	0.634586	0.0452178	0.0110552	0.00329667	IMPC_OFD_003_001___10	Open Field	Periphery distance travelled series	IMPC_OFD_003_001.10	20	20	20	20	significant	Different size	IMPC_OFD_003_001.10	_00138_145
37949	ONLI_0442	CSHPOS	1-(1Z-alkenyl),2-acyl-glycerophosphocholines	PCo-38:5 A	YPAPIRJFGNBODV-AMFPDOHCSA-N	53480715	CCCCCCCCCCCCCCCC/C=C\OCC(COP(=O)([O-])OCC[N+](C)(C)C)OC(=O)CCCCCC/C=C\C/C=C\C/C=C\C/C=C\CC	0.308255	0.469173	0.520301	0.0534073	0.0384427	0.0201482	IMPC_OFD_003_001___10	Open Field	Periphery distance travelled series	IMPC_OFD_003_001.10	20	20	20	20	significant	Different size	IMPC_OFD_003_001.10	_00138_146
38535	ONLI_0449	CSHPOS	Phosphosphingolipids	SMd39:1	YXSZOBWVQJIWNE-QVDCKBILSA-N	52931193	CCCCCCCCCCCCCCCCCCCCC(=O)N[C@@H](COP(=O)([O-])OCC[N+](C)(C)C)[C@@H](/C=C/CCCCCCCCCCCCC)O	0.202439	0.518797	0.458647	0.209549	0.0205599	0.0434755	IMPC_OFD_003_001___10	Open Field	Periphery distance travelled series	IMPC_OFD_003_001.10	20	20	20	20	significant	Different size	IMPC_OFD_003_001.10	_00138_151
46459	ONLI_0569	CSHNEG	Sphingomyelins	SM d34:2; SM d18:2/16:0;	YLWSJLLZUHSIEA-CKSUKHGVSA-N	52931235	CCCCCCCCCCCCCCCC(=O)N[C@@H](COP(=O)([O-])OCC[N+](C)(C)C)[C@@H](/C=C/CCCCCCCC/C=C\CCC)O	0.313508	0.53985	0.696241	0.0493154	0.0153757	0.000909209	IMPC_OFD_003_001___10	Open Field	Periphery distance travelled series	IMPC_OFD_003_001.10	20	20	20	20	significant	Different size	IMPC_OFD_003_001.10	_00138_176
46520	ONLI_0570	CSHNEG	Phosphosphingolipids	SM d34:1	RWKUXQNLWDTSLO-GWQJGLRPSA-N	9939941	CCCCCCCCCCCCCCCC(=O)N[C@@H](COP(=O)([O-])OCC[N+](C)(C)C)[C@@H](/C=C/CCCCCCCCCCCCC)O	0.467917	0.652632	0.517293	0.00258271	0.00232893	0.0209784	IMPC_OFD_003_001___10	Open Field	Periphery distance travelled series	IMPC_OFD_003_001.10	20	20	20	20	significant	Different size	IMPC_OFD_003_001.10	_00138_177
49644	ONLI_0605	CSHNEG	1-alkyl,2-acylglycero-3-phosphocholines	PC 36:4e; PC 16:0e/20:4;	SOUZQPFUXRVDGK-KCTKZSJBSA-N	53481701	CCCCCCCCCCCCCCCCOC[C@H](COP(=O)([O-])OCC[N+](C)(C)C)OC(=O)CCCCCC/C=C\C/C=C\C/C=C\C/C=C\CC	0.3	0.464662	0.509774	0.0603886	0.04054	0.0231751	IMPC_OFD_003_001___10	Open Field	Periphery distance travelled series	IMPC_OFD_003_001.10	20	20	20	20	significant	Different size	IMPC_OFD_003_001.10	_00138_192
51156	ONLI_0623	CSHNEG	Sphingomyelins	SM d40:2; SM d18:2/22:0;	APNZBDYCMWLVNM-NWHASJFHSA-N	52931237	CCCCCCCCCCCCCCCCCCCCCC(=O)N[C@@H](COP(=O)([O-])OCC[N+](C)(C)C)[C@@H](/C=C/CCCCCCCC/C=C\CCC)O	0.265854	0.640602	0.621053	0.0973827	0.00294296	0.00422208	IMPC_OFD_003_001___10	Open Field	Periphery distance travelled series	IMPC_OFD_003_001.10	20	20	20	20	significant	Different size	IMPC_OFD_003_001.10	_00138_200
77109	ONLI_0091	gctof	1,2-aminoalcohols	ethanolamine	HZAXFHJVJLSVMW-UHFFFAOYSA-N	700	C(CO)N	-0.625141	-0.553383	-0.666165	2.46278e-05	0.0126451	0.00176841	IMPC_OFD_003_001___15	Open Field	Periphery distance travelled series	IMPC_OFD_003_001.15	20	20	20	20	significant	Different size	IMPC_OFD_003_001.15	_00139_22
15836	ONLI_0207	CSHPOS	Phosphatidylcholines	PC(18:0/22:6(4Z,7Z,10Z,13Z,16Z,19Z)	FAUYAENFVCNTAL-PFFNLMTBSA-N	24778876	CCCCCCCCCCCCCCCCCC(=O)OC[C@H](COP(=O)([O-])OCC[N+](C)(C)C)OC(=O)CC/C=C\C/C=C\C/C=C\C/C=C\C/C=C\C/C=C\CC	0.449156	0.476692	0.493233	0.00396504	0.0351387	0.0286611	IMPC_OFD_003_001___15	Open Field	Periphery distance travelled series	IMPC_OFD_003_001.15	20	20	20	20	significant	Different size	IMPC_OFD_003_001.15	_00139_37
19656	ONLI_0249	CSHPOS	Phosphatidylcholines	PC 16:0-22:6	IESVDEZGAHUQJU-ZLBXKVHBSA-N	6441886	CCCCCCCCCCCCCCCC(=O)OC[C@H](COP(=O)([O-])OCC[N+](C)(C)C)OC(=O)CC/C=C\C/C=C\C/C=C\C/C=C\C/C=C\C/C=C\CC	0.331144	0.446617	0.488722	0.0374019	0.0498458	0.0303245	IMPC_OFD_003_001___15	Open Field	Periphery distance travelled series	IMPC_OFD_003_001.15	20	20	20	20	significant	Different size	IMPC_OFD_003_001.15	_00139_44
29045	ONLI_0349	CSHPOS	1-alkyl,2-acylglycero-3-phosphocholines	PC 38:6e; PC 16:0e/22:6;	QQQQNYAHSSIZBU-HIQXTUQZSA-N	16759366	CCCCCCCCCCCCCCCCOC[C@H](COP(=O)([O-])OCC[N+](C)(C)C)OC(=O)CC/C=C\C/C=C\C/C=C\C/C=C\C/C=C\C/C=C\CC	0.432645	0.580451	0.678195	0.00567977	0.00836368	0.00136819	IMPC_OFD_003_001___15	Open Field	Periphery distance travelled series	IMPC_OFD_003_001.15	20	20	20	20	significant	Different size	IMPC_OFD_003_001.15	_00139_69
37752	ONLI_0440	CSHPOS	Phosphosphingolipids	SMd34:2	OAHFTKWSJGVMTG-MBIABJCFSA-N	52931145	CCCCCCCCCCCCC/C=C/[C@H]([C@H](COP(=O)([O-])OCC[N+](C)(C)C)NC(=O)CCCCCCC/C=C\CCCCCC)O	0.299062	0.569925	0.496241	0.0612262	0.00985866	0.0275933	IMPC_OFD_003_001___15	Open Field	Periphery distance travelled series	IMPC_OFD_003_001.15	20	20	20	20	significant	Different size	IMPC_OFD_003_001.15	_00139_92
42353	ONLI_0509	CSHNEG	1-acyl-sn-glycero-3-phosphocholines	LPC 16:0	ASWBNKHCZGQVJV-HSZRJFAPSA-N	460602	CCCCCCCCCCCCCCCC(=O)OC[C@H](COP(=O)([O-])OCC[N+](C)(C)C)O	0.445028	0.503759	0.586466	0.00434443	0.0250626	0.00759661	IMPC_OFD_003_001___15	Open Field	Periphery distance travelled series	IMPC_OFD_003_001.15	20	20	20	20	significant	Different size	IMPC_OFD_003_001.15	_00139_104
42739	ONLI_0516	CSHNEG	1-acyl-sn-glycero-3-phosphocholines	LPC 18:0	IHNKQIMGVNPMTC-RUZDIDTESA-N	497299	CCCCCCCCCCCCCCCCCC(=O)OC[C@H](COP(=O)([O-])OCC[N+](C)(C)C)O	0.463415	0.630075	0.536842	0.00286839	0.00358436	0.0160432	IMPC_OFD_003_001___15	Open Field	Periphery distance travelled series	IMPC_OFD_003_001.15	20	20	20	20	significant	Different size	IMPC_OFD_003_001.15	_00139_106
46460	ONLI_0569	CSHNEG	Sphingomyelins	SM d34:2; SM d18:2/16:0;	YLWSJLLZUHSIEA-CKSUKHGVSA-N	52931235	CCCCCCCCCCCCCCCC(=O)N[C@@H](COP(=O)([O-])OCC[N+](C)(C)C)[C@@H](/C=C/CCCCCCCC/C=C\CCC)O	0.285366	0.53985	0.544361	0.0745507	0.0153757	0.0144169	IMPC_OFD_003_001___15	Open Field	Periphery distance travelled series	IMPC_OFD_003_001.15	20	20	20	20	significant	Different size	IMPC_OFD_003_001.15	_00139_120
52946	ONLI_0650	CSHNEG	Phosphatidylcholines	PC 38:5; PC 16:0-22:5;	ARDJUHDXABDVFH-ZHSIBHBUSA-N	24778737	CCCCCCCCCCCCCCCC(=O)OC[C@H](COP(=O)([O-])OCC[N+](C)(C)C)OC(=O)CCCCC/C=C\C/C=C\C/C=C\C/C=C\C/C=C\CC	0.409006	0.512782	0.505263	0.00924447	0.0222752	0.0245795	IMPC_OFD_003_001___15	Open Field	Periphery distance travelled series	IMPC_OFD_003_001.15	20	20	20	20	significant	Different size	IMPC_OFD_003_001.15	_00139_132
54547	ONLI_0669	CSHNEG	Phosphatidylinositols	PI 38:4; PI 18:0-20:4;	KRTOMQDUKGRFDJ-LWFBQQSYSA-N	42607491	CCCCCCCCCCCCCCCCCC(=O)OC[C@H](COP(=O)(O)OC1C([C@@H](C(C(C1O)O)O)O)O)OC(=O)CCC/C=C\C/C=C\C/C=C\C/C=C\CCCCC	0.451595	0.532331	0.484211	0.00375479	0.0170885	0.032064	IMPC_OFD_003_001___15	Open Field	Periphery distance travelled series	IMPC_OFD_003_001.15	20	20	20	20	significant	Different size	IMPC_OFD_003_001.15	_00139_139
54931	ONLI_0673	CSHNEG	Phosphatidylcholines	PC 40:6	FYVNIFOYDIIODX-KNKJIUSSSA-N	24778900	CCCCCC/C=C\CCCCCCCCCC(=O)OC[C@H](COP(=O)([O-])OCC[N+](C)(C)C)OC(=O)CCCCC/C=C\C/C=C\C/C=C\C/C=C\C/C=C\CC	0.463602	0.517293	0.46015	0.00285595	0.0209784	0.0427264	IMPC_OFD_003_001___15	Open Field	Periphery distance travelled series	IMPC_OFD_003_001.15	20	20	20	20	significant	Different size	IMPC_OFD_003_001.15	_00139_140
67221	ONLI_0877	HILICPOS	Nicotinamides	Nicotinamide	DFPAKSUCGFBDDF-UHFFFAOYSA-N	936	C1=CC(=CN=C1)C(=O)N	-0.425891	-0.44812	-0.497744	0.00654903	0.0490119	0.0270715	IMPC_OFD_003_001___15	Open Field	Periphery distance travelled series	IMPC_OFD_003_001.15	20	20	20	20	significant	Different size	IMPC_OFD_003_001.15	_00139_171
78029	ONLI_1162	Oxylipins	Hydroxyeicosatetraenoic acids	12S-HETE	ZNHVWPKMFKADKW-LQWMCKPYSA-N	5283155	CCCCC/C=C\C[C@@H](/C=C/C=C\C/C=C\CCCC(=O)O)O	-0.468668	-0.475188	-0.461654	0.00253763	0.0357808	0.0419875	IMPC_OFD_003_001___20	Open Field	Periphery distance travelled series	IMPC_OFD_003_001.20	20	20	20	20	significant	Different size	IMPC_OFD_003_001.20	_00140_181
57630	ONLI_0733	HILICPOS	Glycerophosphocholines	Glycerophosphocholine	SUHOQUVVVLNYQR-QMMMGPOBSA-N	71920	C[N+](C)(C)CCOP(=O)([O-])OC[C@H](CO)O	0.638837	0.566917	0.571429	1.47239e-05	0.0103238	0.0096326	IMPC_OFD_003_001___5	Open Field	Periphery distance travelled series	IMPC_OFD_003_001.5	20	20	20	20	significant	Different size	IMPC_OFD_003_001.5	_00141_81
13536	ONLI_0183	CSHPOS	Triacylglycerols	TAG 52:7; TAG 16:1-18:2-18:4;	CMQKNURFVKDTED-HQIPLBRRSA-N	131759572	CCCCCC/C=C\CCCCCCCC(=O)OC[C@@H](COC(=O)CCCC/C=C\C/C=C\C/C=C\C/C=C\CC)OC(=O)CCCCCCC/C=C\C/C=C\CCCCC	-0.318949	-0.479699	-0.449624	0.0453497	0.0338819	0.0481889	IMPC_OFD_004_001___10	Open Field	Periphery resting time series	IMPC_OFD_004_001.10	20	20	20	20	significant	Different size	IMPC_OFD_004_001.10	_00142_19
16134	ONLI_0210	CSHPOS	Triacylglycerols	TAG 52:5; TAG 16:0-16:1-20:4;	BURBQZUNMNAKMA-RAKRAUFVSA-N	131750351	CCCCCCCCCCCCCCCC(=O)OC[C@@H](COC(=O)CCC/C=C\C/C=C\C/C=C\C/C=C\CCCCC)OC(=O)CCCCCCC/C=C\CCCCCC	-0.426829	-0.500752	-0.487218	0.00642178	0.0260515	0.0308957	IMPC_OFD_004_001___10	Open Field	Periphery resting time series	IMPC_OFD_004_001.10	20	20	20	20	significant	Different size	IMPC_OFD_004_001.10	_00142_31
17036	ONLI_0221	CSHPOS	1,2-diacylglycerols	DAG 34:2; DAG 16:1-18:1;	FWWLDEIJAPIBES-DATDAJMQSA-N	9543694	CCCCCCCC/C=C\CCCCCCCC(=O)O[C@@H](CO)COC(=O)CCCCCCC/C=C\CCCCCC	-0.360413	-0.574436	-0.479699	0.0229052	0.00919321	0.0338819	IMPC_OFD_004_001___10	Open Field	Periphery resting time series	IMPC_OFD_004_001.10	20	20	20	20	significant	Different size	IMPC_OFD_004_001.10	_00142_33
19723	ONLI_0250	CSHPOS	Triacylglycerols	TAG 48:4; TAG 12:0-18:1-18:3;	0	NA	0	-0.414822	-0.654135	-0.455639	0.00822424	0.00226023	0.0450045	IMPC_OFD_004_001___10	Open Field	Periphery resting time series	IMPC_OFD_004_001.10	20	20	20	20	significant	Different size	IMPC_OFD_004_001.10	_00142_40
23824	ONLI_0293	CSHPOS	Triacylglycerols	TAG 51:4; TAG 15:0-16:0-20:4;	LVHOHHSODZICOO-IIKXJSSRSA-N	131750647	CCCCCCCCCCCCCCCC(=O)O[C@@H](COC(=O)CCCCCCCCCCCCCC)COC(=O)CCC/C=C\C/C=C\C/C=C\C/C=C\CCCCC	-0.4197	-0.544361	-0.566917	0.00744515	0.0144169	0.0103238	IMPC_OFD_004_001___10	Open Field	Periphery resting time series	IMPC_OFD_004_001.10	20	20	20	20	significant	Different size	IMPC_OFD_004_001.10	_00142_54
24223	ONLI_0299	CSHPOS	Triacylglycerols	TAG 51:4; TAG 16:0-17:2-18:2;	MBVRTVOCODAFTO-ZQYFXHSESA-N	138208584	CCCCCCCCCCCCCCCC(=O)OCC(COC(=O)CCCCCCCC/C=C\C=C/CCCCC)OC(=O)CCCCCCCCC/C=C\C/C=C\CC	-0.361351	-0.578947	-0.479699	0.0225329	0.00856506	0.0338819	IMPC_OFD_004_001___10	Open Field	Periphery resting time series	IMPC_OFD_004_001.10	20	20	20	20	significant	Different size	IMPC_OFD_004_001.10	_00142_56
25150	ONLI_0310	CSHPOS	Lineolic acids and derivatives	DAG 36:4; DAG 18:2-18:2;	MQGBAQLIFKSMEM-ZHARMHCNSA-N	9543729	CCCCC/C=C\C/C=C\CCCCCCCC(=O)OC[C@H](CO)OC(=O)CCCCCCC/C=C\C/C=C\CCCCC	-0.470919	-0.616541	-0.569925	0.0024065	0.00457438	0.00985866	IMPC_OFD_004_001___10	Open Field	Periphery resting time series	IMPC_OFD_004_001.10	20	20	20	20	significant	Different size	IMPC_OFD_004_001.10	_00142_57
27843	ONLI_0337	CSHPOS	Lineolic acids and derivatives	DAG 36:5; DAG 18:2-18:3;	PGXBELQFNRPKBC-WBVIKXMWSA-N	9543737	CCCCC/C=C\C/C=C\CCCCCCCC(=O)OC[C@H](CO)OC(=O)CCCCCCC/C=C\C/C=C\C/C=C\CC	-0.478049	-0.633083	-0.496241	0.00202986	0.00339037	0.0275933	IMPC_OFD_004_001___10	Open Field	Periphery resting time series	IMPC_OFD_004_001.10	20	20	20	20	significant	Different size	IMPC_OFD_004_001.10	_00142_64
39142	ONLI_0455	CSHPOS	Triacylglycerols	TAG 52:6; TAG 16:1-18:2-18:3;	NOOJQDXMGLPOOA-UJLFLSCOSA-N	131759571	CCCCCC/C=C\CCCCCCCC(=O)OC[C@@H](COC(=O)CCCCCCC/C=C\C/C=C\C/C=C\CC)OC(=O)CCCCCCC/C=C\C/C=C\CCCCC	-0.406379	-0.541353	-0.530827	0.00973989	0.0150505	0.0174489	IMPC_OFD_004_001___10	Open Field	Periphery resting time series	IMPC_OFD_004_001.10	20	20	20	20	significant	Different size	IMPC_OFD_004_001.10	_00142_90
32616	ONLI_0388	CSHPOS	Triacylglycerols	TAG 40:0; TAG 12:0-14:0-14:0;	UGBCBXMLXHJYBS-UHFFFAOYSA-N	5127847	CCCCCCCCCCCCCC(=O)OCC(COC(=O)CCCCCCCCCCC)OC(=O)CCCCCCCCCCCCC	-0.583401	-0.542105	-0.55188	0.000129772	0.0180412	0.0129274	IMPC_OFD_004_001___15	Open Field	Periphery resting time series	IMPC_OFD_004_001.15	19	20	20	20	significant	Different size	IMPC_OFD_004_001.15	_00143_63
34724	ONLI_0409	CSHPOS	Triacylglycerols	TAG 54:5; TAG 16:0-18:1-20:4;	WKSLEDJKCJNITP-AHQIBYCWSA-N	131755177	CCCCCCCCCCCCCCCC(=O)OC[C@@H](COC(=O)CCC/C=C\C/C=C\C/C=C\C/C=C\CCCCC)OC(=O)CCCCCCCCC/C=C\CCCCCC	-0.398687	-0.47218	-0.503759	0.0113245	0.0370929	0.0250626	IMPC_OFD_004_001___15	Open Field	Periphery resting time series	IMPC_OFD_004_001.15	20	20	20	20	significant	Different size	IMPC_OFD_004_001.15	_00143_68
53139	ONLI_0064	gctof	Purine nucleosides	inosine	UGQMRVRMYYASKQ-KQYNXXCUSA-N	135398641	C1=NC2=C(C(=O)N1)N=CN2[C@H]3[C@@H]([C@@H]([C@H](O3)CO)O)O	-0.423867	-0.579165	-0.556391	0.00641877	0.00745196	0.0120956	IMPC_OFD_005_001___10	Open Field	Distance travelled	IMPC_OFD_005_001.10	20	20	20	20	significant	Different size	IMPC_OFD_005_001.10	_00146_9
27844	ONLI_0337	CSHPOS	Lineolic acids and derivatives	DAG 36:5; DAG 18:2-18:3;	PGXBELQFNRPKBC-WBVIKXMWSA-N	9543737	CCCCC/C=C\C/C=C\CCCCCCCC(=O)OC[C@H](CO)OC(=O)CCCCCCC/C=C\C/C=C\C/C=C\CC	0.499625	0.521805	0.666165	0.00118746	0.0197431	0.00176841	IMPC_OFD_005_001___10	Open Field	Distance travelled	IMPC_OFD_005_001.10	20	20	20	20	significant	Different size	IMPC_OFD_005_001.10	_00146_55
72338	ONLI_1017	HILICNEG	Tyrosine and derivatives	N-Acetyl-L-tyrosine	CAHKINHBCWCHCF-JTQLQIEISA-N	68310	CC(=O)N[C@@H](CC1=CC=C(C=C1)O)C(=O)O	0.57004	0.457143	0.698246	0.000196934	0.0442348	0.00122872	IMPC_OFD_005_001___15	Open Field	Distance travelled	IMPC_OFD_005_001.15	20	19	20	20	significant	Different size	IMPC_OFD_005_001.15	_00147_55
19728	ONLI_0250	CSHPOS	Triacylglycerols	TAG 48:4; TAG 12:0-18:1-18:3;	0	NA	0	0.517448	0.451128	0.562406	0.000743605	0.0473768	0.0110552	IMPC_OFD_005_001___20	Open Field	Distance travelled	IMPC_OFD_005_001.20	20	20	20	20	significant	Different size	IMPC_OFD_005_001.20	_00148_51
43927	ONLI_0539	CSHNEG	Phosphatidylcholines	PC 25:0; PC 12:0-13:0;	FCTBVSCBBWKZML-WJOKGBTCSA-N	24778516	CCCCCCCCCCCCC(=O)O[C@H](COC(=O)CCCCCCCCCCC)COP(=O)([O-])OCC[N+](C)(C)C	-0.47636	-0.493233	-0.457143	0.002114	0.0286611	0.0442348	IMPC_OFD_005_001___5	Open Field	Distance travelled	IMPC_OFD_005_001.5	20	20	20	20	significant	Different size	IMPC_OFD_005_001.5	_00149_31
57632	ONLI_0733	HILICPOS	Glycerophosphocholines	Glycerophosphocholine	SUHOQUVVVLNYQR-QMMMGPOBSA-N	71920	C[N+](C)(C)CCOP(=O)([O-])OC[C@H](CO)O	0.497936	0.46015	0.518797	0.0012398	0.0427264	0.0205599	IMPC_OFD_005_001___5	Open Field	Distance travelled	IMPC_OFD_005_001.5	20	20	20	20	significant	Different size	IMPC_OFD_005_001.5	_00149_37
18033	ONLI_0231	CSHPOS	Phosphatidylethanolamines	PE34:2	HBZNVZIRJWODIB-NHCUFCNUSA-N	9546747	CCCCCCCCCCCCCCCC(=O)OC[C@H](COP(=O)(O)OCCN)OC(=O)CCCCCCC/C=C\C/C=C\CCCCC	0.327343	0.447121	0.483641	0.0392232	0.0480894	0.0307336	IMPC_OFD_006_001___10	Open Field	Number of Rears	IMPC_OFD_006_001.10	20	20	20	20	significant	Different size	IMPC_OFD_006_001.10	_00150_43
20956	ONLI_0263	CSHPOS	Phosphatidylcholines	PC34:2	JLPULHDHAOZNQI-ZTIMHPMXSA-N	5287971	CCCCCCCCCCCCCCCC(=O)OC[C@H](COP(=O)([O-])OCC[N+](C)(C)C)OC(=O)CCCCCCC/C=C\C/C=C\CCCCC	0.375581	0.496801	0.451298	0.01693	0.025857	0.0457916	IMPC_OFD_006_001___10	Open Field	Number of Rears	IMPC_OFD_006_001.10	20	20	20	20	significant	Different size	IMPC_OFD_006_001.10	_00150_53
49249	ONLI_0600	CSHNEG	Phosphatidylcholines	PC 34:3	CNNSEHUKQJCGTE-UPPWDXJYSA-N	24778699	CCCCCCCCCCCCCCCC(=O)OC[C@H](COP(=O)([O-])OCC[N+](C)(C)C)OC(=O)CCCC/C=C\C/C=C\C/C=C\CCCCC	0.360207	0.447043	0.465589	0.0224216	0.0481334	0.0385625	IMPC_OFD_006_001___15	Open Field	Number of Rears	IMPC_OFD_006_001.15	20	20	20	20	significant	Different size	IMPC_OFD_006_001.15	_00151_40
72232	ONLI_1016	HILICNEG	Histidine and derivatives	N-Acetylhistidine	KBOJOGQFRVVWBH-UHFFFAOYSA-N	273260	CC(=O)NC(CC1=CN=CN1)C(=O)O	0.467038	0.505844	0.500219	0.00272273	0.0228763	0.0291759	IMPC_OFD_006_001___15	Open Field	Number of Rears	IMPC_OFD_006_001.15	20	19	20	20	significant	Different size	IMPC_OFD_006_001.15	_00151_67
14822	ONLI_0196	CSHPOS	1-(1Z-alkenyl),2-acyl-glycerophosphocholines	PCo-36:3	DIHWZUCEXWUHOD-IIVNATNGSA-N	53480801	CCCCCCCC/C=C\CCCCCCCC(=O)O[C@H](CO/C=C\CCCCCC/C=C\CCCCCCCC)COP(=O)([O-])OCC[N+](C)(C)C	0.168715	0.450302	0.479308	0.298016	0.0463316	0.0324877	IMPC_OFD_006_001___5	Open Field	Number of Rears	IMPC_OFD_006_001.5	20	20	20	20	significant	Different size	IMPC_OFD_006_001.5	_00153_12
18741	ONLI_0238	CSHPOS	Triacylglycerols	TAG 46:3; TAG 12:0-16:1-18:2;	0	NA	0	-0.493965	-0.604396	-0.578947	0.00333662	0.0248902	0.00856506	IMPC_OFD_007_001___1 point	Open Field	Whole arena resting time	IMPC_OFD_007_001	14	20	20	20	significant	Different size	IMPC_OFD_007_001	_00154_35
72344	ONLI_1017	HILICNEG	Tyrosine and derivatives	N-Acetyl-L-tyrosine	CAHKINHBCWCHCF-JTQLQIEISA-N	68310	CC(=O)N[C@@H](CC1=CC=C(C=C1)O)C(=O)O	-0.546356	-0.461654	-0.596491	0.000396544	0.0419875	0.00816354	IMPC_OFD_007_001___1 point	Open Field	Whole arena resting time	IMPC_OFD_007_001	20	19	20	20	significant	Different size	IMPC_OFD_007_001	_00154_116
18742	ONLI_0238	CSHPOS	Triacylglycerols	TAG 46:3; TAG 12:0-16:1-18:2;	0	NA	0	0.489381	0.648352	0.506767	0.003679	0.0145264	0.024104	IMPC_OFD_010_001___1 point	Open Field	Periphery distance travelled	IMPC_OFD_010_001	14	20	20	20	significant	Different size	IMPC_OFD_010_001	_00157_38
12234	ONLI_0169	CSHPOS	Triacylglycerols	TAG 53:5; TAG 17:1-18:2-18:2;	0	NA	0	-0.257598	-0.508271	-0.46015	0.108536	0.0236359	0.0427264	IMPC_OFD_011_001___1 point	Open Field	Periphery resting time	IMPC_OFD_011_001	20	20	20	20	significant	Different size	IMPC_OFD_011_001	_00158_22
24230	ONLI_0299	CSHPOS	Triacylglycerols	TAG 51:4; TAG 16:0-17:2-18:2;	MBVRTVOCODAFTO-ZQYFXHSESA-N	138208584	CCCCCCCCCCCCCCCC(=O)OCC(COC(=O)CCCCCCCC/C=C\C=C/CCCCC)OC(=O)CCCCCCCCC/C=C\C/C=C\CC	-0.200563	-0.44812	-0.464662	0.213872	0.0490119	0.04054	IMPC_OFD_011_001___1 point	Open Field	Periphery resting time	IMPC_OFD_011_001	20	20	20	20	significant	Different size	IMPC_OFD_011_001	_00158_43
25158	ONLI_0310	CSHPOS	Lineolic acids and derivatives	DAG 36:4; DAG 18:2-18:2;	MQGBAQLIFKSMEM-ZHARMHCNSA-N	9543729	CCCCC/C=C\C/C=C\CCCCCCCC(=O)OC[C@H](CO)OC(=O)CCCCCCC/C=C\C/C=C\CCCCC	-0.324765	-0.554887	-0.452632	0.0414025	0.0123679	0.0465754	IMPC_OFD_011_001___1 point	Open Field	Periphery resting time	IMPC_OFD_011_001	20	20	20	20	significant	Different size	IMPC_OFD_011_001	_00158_44
30537	ONLI_0365	CSHPOS	Triacylglycerols	TAG 52:4; TAG 16:0-18:1-18:3;	VMDPPWLXQNSYER-RPLIZZJZSA-N	131755181	CCCCCCCCCCCCCCCC(=O)OC[C@@H](COC(=O)CCCCCCC/C=C\C/C=C\C/C=C\CC)OC(=O)CCCCCCCCC/C=C\CCCCCC	-0.312758	-0.44812	-0.47218	0.0498839	0.0490119	0.0370929	IMPC_OFD_011_001___1 point	Open Field	Periphery resting time	IMPC_OFD_011_001	20	20	20	20	significant	Different size	IMPC_OFD_011_001	_00158_56
32439	ONLI_0386	CSHPOS	Triacylglycerols	TAG 52:4; TAG 16:0-18:2-18:2;	LXAWUIOWWNQCQA-QOFSRLOCSA-N	97042228	CCCCCCCCCCCCCCCC(=O)OC[C@@H](COC(=O)CCCCCCC/C=C\C/C=C\CCCCC)OC(=O)CCCCCCC/C=C\C/C=C\CCCCC	-0.369981	-0.466165	-0.506767	0.0193401	0.0398311	0.024104	IMPC_OFD_011_001___1 point	Open Field	Periphery resting time	IMPC_OFD_011_001	20	20	20	20	significant	Different size	IMPC_OFD_011_001	_00158_59
32625	ONLI_0388	CSHPOS	Triacylglycerols	TAG 40:0; TAG 12:0-14:0-14:0;	UGBCBXMLXHJYBS-UHFFFAOYSA-N	5127847	CCCCCCCCCCCCCC(=O)OCC(COC(=O)CCCCCCCCCCC)OC(=O)CCCCCCCCCCCCC	-0.555263	-0.505263	-0.553383	0.00030652	0.0290236	0.0126451	IMPC_OFD_011_001___1 point	Open Field	Periphery resting time	IMPC_OFD_011_001	19	20	20	20	significant	Different size	IMPC_OFD_011_001	_00158_60
39151	ONLI_0455	CSHPOS	Triacylglycerols	TAG 52:6; TAG 16:1-18:2-18:3;	NOOJQDXMGLPOOA-UJLFLSCOSA-N	131759571	CCCCCC/C=C\CCCCCCCC(=O)OC[C@@H](COC(=O)CCCCCCC/C=C\C/C=C\C/C=C\CC)OC(=O)CCCCCCC/C=C\C/C=C\CCCCC	-0.275422	-0.464662	-0.506767	0.0855896	0.04054	0.024104	IMPC_OFD_011_001___1 point	Open Field	Periphery resting time	IMPC_OFD_011_001	20	20	20	20	significant	Different size	IMPC_OFD_011_001	_00158_70
44169	ONLI_0053	gctof	Sugar alcohols	lyxitol	HEBKCHPVOIAQTA-IMJSIDKUSA-N	439255	C([C@@H](C([C@H](CO)O)O)O)O	0.542589	0.515789	0.568421	0.000368522	0.0214037	0.0100891	IMPC_OFD_014_001___1 point	Open Field	Center distance travelled	IMPC_OFD_014_001	20	20	20	20	significant	Different size	IMPC_OFD_014_001	_00161_5
12237	ONLI_0169	CSHPOS	Triacylglycerols	TAG 53:5; TAG 17:1-18:2-18:2;	0	NA	0	0.33152	0.57594	0.463158	0.0371768	0.00897977	0.0412588	IMPC_OFD_014_001___1 point	Open Field	Center distance travelled	IMPC_OFD_014_001	20	20	20	20	significant	Different size	IMPC_OFD_014_001	_00161_16
16147	ONLI_0210	CSHPOS	Triacylglycerols	TAG 52:5; TAG 16:0-16:1-20:4;	BURBQZUNMNAKMA-RAKRAUFVSA-N	131750351	CCCCCCCCCCCCCCCC(=O)OC[C@@H](COC(=O)CCC/C=C\C/C=C\C/C=C\C/C=C\CCCCC)OC(=O)CCCCCCC/C=C\CCCCCC	0.397561	0.496241	0.463158	0.011574	0.0275933	0.0412588	IMPC_OFD_014_001___1 point	Open Field	Center distance travelled	IMPC_OFD_014_001	20	20	20	20	significant	Different size	IMPC_OFD_014_001	_00161_28
23834	ONLI_0293	CSHPOS	Triacylglycerols	TAG 51:4; TAG 15:0-16:0-20:4;	LVHOHHSODZICOO-IIKXJSSRSA-N	131750647	CCCCCCCCCCCCCCCC(=O)O[C@@H](COC(=O)CCCCCCCCCCCCCC)COC(=O)CCC/C=C\C/C=C\C/C=C\C/C=C\CCCCC	0.357598	0.520301	0.547368	0.0240534	0.0201482	0.0138052	IMPC_OFD_014_001___1 point	Open Field	Center distance travelled	IMPC_OFD_014_001	20	20	20	20	significant	Different size	IMPC_OFD_014_001	_00161_45
24232	ONLI_0299	CSHPOS	Triacylglycerols	TAG 51:4; TAG 16:0-17:2-18:2;	MBVRTVOCODAFTO-ZQYFXHSESA-N	138208584	CCCCCCCCCCCCCCCC(=O)OCC(COC(=O)CCCCCCCC/C=C\C=C/CCCCC)OC(=O)CCCCCCCCC/C=C\C/C=C\CC	0.298311	0.56391	0.497744	0.061903	0.0108068	0.0270715	IMPC_OFD_014_001___1 point	Open Field	Center distance travelled	IMPC_OFD_014_001	20	20	20	20	significant	Different size	IMPC_OFD_014_001	_00161_46
30540	ONLI_0365	CSHPOS	Triacylglycerols	TAG 52:4; TAG 16:0-18:1-18:3;	VMDPPWLXQNSYER-RPLIZZJZSA-N	131755181	CCCCCCCCCCCCCCCC(=O)OC[C@@H](COC(=O)CCCCCCC/C=C\C/C=C\C/C=C\CC)OC(=O)CCCCCCCCC/C=C\CCCCCC	0.378049	0.521805	0.452632	0.0167101	0.0197431	0.0465754	IMPC_OFD_014_001___1 point	Open Field	Center distance travelled	IMPC_OFD_014_001	20	20	20	20	significant	Different size	IMPC_OFD_014_001	_00161_60
32442	ONLI_0386	CSHPOS	Triacylglycerols	TAG 52:4; TAG 16:0-18:2-18:2;	LXAWUIOWWNQCQA-QOFSRLOCSA-N	97042228	CCCCCCCCCCCCCCCC(=O)OC[C@@H](COC(=O)CCCCCCC/C=C\C/C=C\CCCCC)OC(=O)CCCCCCC/C=C\C/C=C\CCCCC	0.418574	0.532331	0.475188	0.00761902	0.0170885	0.0357808	IMPC_OFD_014_001___1 point	Open Field	Center distance travelled	IMPC_OFD_014_001	20	20	20	20	significant	Different size	IMPC_OFD_014_001	_00161_62
39153	ONLI_0455	CSHPOS	Triacylglycerols	TAG 52:6; TAG 16:1-18:2-18:3;	NOOJQDXMGLPOOA-UJLFLSCOSA-N	131759571	CCCCCC/C=C\CCCCCCCC(=O)OC[C@@H](COC(=O)CCCCCCC/C=C\C/C=C\C/C=C\CC)OC(=O)CCCCCCC/C=C\C/C=C\CCCCC	0.339587	0.517293	0.494737	0.0326021	0.0209784	0.0281232	IMPC_OFD_014_001___1 point	Open Field	Center distance travelled	IMPC_OFD_014_001	20	20	20	20	significant	Different size	IMPC_OFD_014_001	_00161_78
72455	ONLI_1021	HILICNEG	L-alpha-amino acids	N-epsilon-Acetyllysine	DTERQYGMUDWYAZ-ZETCQYMHSA-N	92832	CC(=O)NCCCC[C@@H](C(=O)O)N	0.461134	0.488722	0.475439	0.00343604	0.0303245	0.0413366	IMPC_OFD_014_001___1 point	Open Field	Center distance travelled	IMPC_OFD_014_001	20	19	20	20	significant	Different size	IMPC_OFD_014_001	_00161_119
53044	ONLI_0651	CSHNEG	Phosphatidylcholines	PC 38:5; PC 18:1-20:4;	SWOKEJBWARJLGN-ORKYUJCWSA-N	53478767	CCCCCCCC/C=C\CCCCCCCC(=O)OC[C@H](COP(=O)([O-])OCC[N+](C)(C)C)OC(=O)CCCCCC/C=C\C/C=C\C/C=C\C/C=C\CC	-0.390807	-0.514286	-0.452632	0.0131724	0.021836	0.0465754	IMPC_OFD_015_001___1 point	Open Field	Center resting time	IMPC_OFD_015_001	20	20	20	20	significant	Different size	IMPC_OFD_015_001	_00162_148
72458	ONLI_1021	HILICNEG	L-alpha-amino acids	N-epsilon-Acetyllysine	DTERQYGMUDWYAZ-ZETCQYMHSA-N	92832	CC(=O)NCCCC[C@@H](C(=O)O)N	0.462513	0.465487	0.548727	0.00303122	0.0386103	0.0149771	IMPC_OFD_019_001___1 point	Open Field	Number of center entries	IMPC_OFD_019_001	20	19	20	20	significant	Different size	IMPC_OFD_019_001	_00166_82
18744	ONLI_0238	CSHPOS	Triacylglycerols	TAG 46:3; TAG 12:0-16:1-18:2;	0	NA	0	0.427655	0.56044	0.509774	0.0122595	0.040135	0.0231751	IMPC_OFD_020_001___1 point	Open Field	Distance travelled - total	IMPC_OFD_020_001	14	20	20	20	significant	Different size	IMPC_OFD_020_001	_00167_30
72241	ONLI_1016	HILICNEG	Histidine and derivatives	N-Acetylhistidine	KBOJOGQFRVVWBH-UHFFFAOYSA-N	273260	CC(=O)NC(CC1=CN=CN1)C(=O)O	0.476518	0.508271	0.498246	0.00241479	0.0236359	0.0316174	IMPC_OFD_020_001___1 point	Open Field	Distance travelled - total	IMPC_OFD_020_001	20	19	20	20	significant	Different size	IMPC_OFD_020_001	_00167_101
72353	ONLI_1017	HILICNEG	Tyrosine and derivatives	N-Acetyl-L-tyrosine	CAHKINHBCWCHCF-JTQLQIEISA-N	68310	CC(=O)N[C@@H](CC1=CC=C(C=C1)O)C(=O)O	0.57996	0.479699	0.712281	0.000144722	0.0338819	0.000889312	IMPC_OFD_020_001___1 point	Open Field	Distance travelled - total	IMPC_OFD_020_001	20	19	20	20	significant	Different size	IMPC_OFD_020_001	_00167_102
72459	ONLI_1021	HILICNEG	L-alpha-amino acids	N-epsilon-Acetyllysine	DTERQYGMUDWYAZ-ZETCQYMHSA-N	92832	CC(=O)NCCCC[C@@H](C(=O)O)N	0.524089	0.497744	0.52807	0.000733733	0.0270715	0.0217395	IMPC_OFD_020_001___1 point	Open Field	Distance travelled - total	IMPC_OFD_020_001	20	19	20	20	significant	Different size	IMPC_OFD_020_001	_00167_103
22938	ONLI_0284	CSHPOS	Triacylglycerols	TAG 58:4; TAG 18:2-18:2-22:0;	OEWUGNNMLZAOCV-HESLGCGWSA-N	25240386	CCCCCCCCCCCCCCCCCCCCCC(=O)OC[C@@H](COC(=O)CCCCCCC/C=C\C/C=C\CCCCC)OC(=O)CCCCCCC/C=C\C/C=C\CCCCC	0.353427	0.511663	0.545865	0.0252774	0.0211071	0.0141083	IMPC_OFD_021_001___1 point	Open Field	Number of rears - total	IMPC_OFD_021_001	20	20	20	20	significant	Different size	IMPC_OFD_021_001	_00168_52
27230	ONLI_0331	CSHPOS	1,2-diacylglycerols	DAG 24:0; DAG 12:0-12:0;	OQQOAWVKVDAJOI-UHFFFAOYSA-N	33979	CCCCCCCCCCCC(=O)OCC(CO)OC(=O)CCCCCCCCCCC	0.391425	0.4462	0.490226	0.0125024	0.0486077	0.0297617	IMPC_OFD_021_001___1 point	Open Field	Number of rears - total	IMPC_OFD_021_001	20	20	20	20	significant	Different size	IMPC_OFD_021_001	_00168_60
32634	ONLI_0388	CSHPOS	Triacylglycerols	TAG 40:0; TAG 12:0-14:0-14:0;	UGBCBXMLXHJYBS-UHFFFAOYSA-N	5127847	CCCCCCCCCCCCCC(=O)OCC(COC(=O)CCCCCCCCCCC)OC(=O)CCCCCCCCCCCCC	-0.52753	-0.480702	-0.55188	0.000668879	0.0389093	0.0129274	IMPC_OFD_042_001___15	Open Field	Periphery permanence time series	IMPC_OFD_042_001.15	19	20	20	20	significant	Different size	IMPC_OFD_042_001.15	_00171_81
21833	ONLI_0272	CSHPOS	1-alkyl,2-acylglycero-3-phosphocholines	PCp-32:0 or PC o-32:1	HJVQHTGUAIETCQ-VEAYGOGPSA-N	52923742	CCCCCCCCCCCCCCCCOC[C@H](COP(=O)([O-])OCC[N+](C)(C)C)OC(=O)CCCCCCC/C=C\CCCCCC	0.25706	0.550583	0.453554	0.109316	0.0118812	0.0445858	IMPC_OFD_043_001___10	Open Field	Periphery average speed series	IMPC_OFD_043_001.10	20	20	20	20	significant	Different size	IMPC_OFD_043_001.10	_00174_42
78164	ONLI_1163	Oxylipins	Hydroxyeicosatetraenoic acids	8S-HETE	NLUNAYAEIJYXRB-VYOQERLCSA-N	5283154	CCCCC/C=C\C/C=C\C=C\[C@H](C/C=C\CCCC(=O)O)O	-0.291231	-0.526534	-0.446953	0.0682662	0.0170764	0.0481839	IMPC_OFD_043_001___10	Open Field	Periphery average speed series	IMPC_OFD_043_001.10	20	20	20	20	significant	Different size	IMPC_OFD_043_001.10	_00174_171
80241	ONLI_1198	Oxylipins	Long-chain fatty acids	10-Nitrooleate	WRADPCFZZWXOTI-BMRADRMJSA-N	24836820	CCCCCCCC/C(=C\CCCCCCCC(=O)O)/[N+](=O)[O-]	-0.498709	-0.457218	-0.516736	0.00123175	0.0490508	0.0196552	IMPC_OFD_043_001___10	Open Field	Periphery average speed series	IMPC_OFD_043_001.10	19	20	20	20	significant	Different size	IMPC_OFD_043_001.10	_00174_176
32637	ONLI_0388	CSHPOS	Triacylglycerols	TAG 40:0; TAG 12:0-14:0-14:0;	UGBCBXMLXHJYBS-UHFFFAOYSA-N	5127847	CCCCCCCCCCCCCC(=O)OCC(COC(=O)CCCCCCCCCCC)OC(=O)CCCCCCCCCCCCC	0.440913	0.478947	0.461076	0.00496262	0.0397056	0.0407423	IMPC_OFD_043_001___20	Open Field	Periphery average speed series	IMPC_OFD_043_001.20	19	20	20	20	significant	Different size	IMPC_OFD_043_001.20	_00176_43
57634	ONLI_0733	HILICPOS	Glycerophosphocholines	Glycerophosphocholine	SUHOQUVVVLNYQR-QMMMGPOBSA-N	71920	C[N+](C)(C)CCOP(=O)([O-])OC[C@H](CO)O	0.589869	0.580451	0.523308	8.48657e-05	0.00836368	0.0193447	IMPC_OFD_043_001___5	Open Field	Periphery average speed series	IMPC_OFD_043_001.5	20	20	20	20	significant	Different size	IMPC_OFD_043_001.5	_00177_45
44181	ONLI_0053	gctof	Sugar alcohols	lyxitol	HEBKCHPVOIAQTA-IMJSIDKUSA-N	439255	C([C@@H](C([C@H](CO)O)O)O)O	0.472045	0.484211	0.470677	0.00234321	0.032064	0.037763	IMPC_OFD_044_001___10	Open Field	Center distance travelled series	IMPC_OFD_044_001.10	20	20	20	20	significant	Different size	IMPC_OFD_044_001.10	_00178_5
24244	ONLI_0299	CSHPOS	Triacylglycerols	TAG 51:4; TAG 16:0-17:2-18:2;	MBVRTVOCODAFTO-ZQYFXHSESA-N	138208584	CCCCCCCCCCCCCCCC(=O)OCC(COC(=O)CCCCCCCC/C=C\C=C/CCCCC)OC(=O)CCCCCCCCC/C=C\C/C=C\CC	0.293809	0.493233	0.458647	0.0660909	0.0286611	0.0434755	IMPC_OFD_044_001___10	Open Field	Center distance travelled series	IMPC_OFD_044_001.10	20	20	20	20	significant	Different size	IMPC_OFD_044_001.10	_00178_34
25171	ONLI_0310	CSHPOS	Lineolic acids and derivatives	DAG 36:4; DAG 18:2-18:2;	MQGBAQLIFKSMEM-ZHARMHCNSA-N	9543729	CCCCC/C=C\C/C=C\CCCCCCCC(=O)OC[C@H](CO)OC(=O)CCCCCCC/C=C\C/C=C\CCCCC	0.420263	0.589474	0.458647	0.00735951	0.00723535	0.0434755	IMPC_OFD_044_001___10	Open Field	Center distance travelled series	IMPC_OFD_044_001.10	20	20	20	20	significant	Different size	IMPC_OFD_044_001.10	_00178_36
27863	ONLI_0337	CSHPOS	Lineolic acids and derivatives	DAG 36:5; DAG 18:2-18:3;	PGXBELQFNRPKBC-WBVIKXMWSA-N	9543737	CCCCC/C=C\C/C=C\CCCCCCCC(=O)OC[C@H](CO)OC(=O)CCCCCCC/C=C\C/C=C\C/C=C\CC	0.453659	0.643609	0.454135	0.00358459	0.00277821	0.0457847	IMPC_OFD_044_001___10	Open Field	Center distance travelled series	IMPC_OFD_044_001.10	20	20	20	20	significant	Different size	IMPC_OFD_044_001.10	_00178_42
39166	ONLI_0455	CSHPOS	Triacylglycerols	TAG 52:6; TAG 16:1-18:2-18:3;	NOOJQDXMGLPOOA-UJLFLSCOSA-N	131759571	CCCCCC/C=C\CCCCCCCC(=O)OC[C@@H](COC(=O)CCCCCCC/C=C\C/C=C\C/C=C\CC)OC(=O)CCCCCCC/C=C\C/C=C\CCCCC	0.309193	0.484211	0.449624	0.0526571	0.032064	0.0481889	IMPC_OFD_044_001___10	Open Field	Center distance travelled series	IMPC_OFD_044_001.10	20	20	20	20	significant	Different size	IMPC_OFD_044_001.10	_00178_59
25172	ONLI_0310	CSHPOS	Lineolic acids and derivatives	DAG 36:4; DAG 18:2-18:2;	MQGBAQLIFKSMEM-ZHARMHCNSA-N	9543729	CCCCC/C=C\C/C=C\CCCCCCCC(=O)OC[C@H](CO)OC(=O)CCCCCCC/C=C\C/C=C\CCCCC	0.35591	0.46015	0.491729	0.0247652	0.0427264	0.0292073	IMPC_OFD_044_001___15	Open Field	Center distance travelled series	IMPC_OFD_044_001.15	20	20	20	20	significant	Different size	IMPC_OFD_044_001.15	_00179_36
72364	ONLI_1017	HILICNEG	Tyrosine and derivatives	N-Acetyl-L-tyrosine	CAHKINHBCWCHCF-JTQLQIEISA-N	68310	CC(=O)N[C@@H](CC1=CC=C(C=C1)O)C(=O)O	0.569433	0.604511	0.636842	0.000200624	0.00563412	0.00415945	IMPC_OFD_044_001___15	Open Field	Center distance travelled series	IMPC_OFD_044_001.15	20	19	20	20	significant	Different size	IMPC_OFD_044_001.15	_00179_101
12251	ONLI_0169	CSHPOS	Triacylglycerols	TAG 53:5; TAG 17:1-18:2-18:2;	0	NA	0	0.374296	0.493233	0.586466	0.0178929	0.0286611	0.00759661	IMPC_OFD_044_001___20	Open Field	Center distance travelled series	IMPC_OFD_044_001.20	20	20	20	20	significant	Different size	IMPC_OFD_044_001.20	_00180_17
19749	ONLI_0250	CSHPOS	Triacylglycerols	TAG 48:4; TAG 12:0-18:1-18:3;	0	NA	0	0.402251	0.466165	0.53985	0.0105646	0.0398311	0.0153757	IMPC_OFD_044_001___20	Open Field	Center distance travelled series	IMPC_OFD_044_001.20	20	20	20	20	significant	Different size	IMPC_OFD_044_001.20	_00180_37
20244	ONLI_0256	CSHPOS	Triacylglycerols	TAG 58:4; TAG 18:1-18:2-22:1;	ODZGUPAQUQGEKA-MJECLYFESA-N	131760188	CCCCCCCC/C=C\CCCCCCCCCCCC(=O)OC[C@H](COC(=O)CCCCCCCCC/C=C\CCCCCC)OC(=O)CCCCCCC/C=C\C/C=C\CCCCC	0.314634	0.484211	0.467669	0.0484726	0.032064	0.0391321	IMPC_OFD_044_001___20	Open Field	Center distance travelled series	IMPC_OFD_044_001.20	20	20	20	20	significant	Different size	IMPC_OFD_044_001.20	_00180_38
21247	ONLI_0266	CSHPOS	Triacylglycerols	TAG 49:3; TAG 15:0-16:1-18:2;	CQSXCZMDDSQLAG-RLFYQNGLSA-N	131754333	CCCCCCCCCCCCCCC(=O)OC[C@@H](COC(=O)CCCCCCC/C=C\C/C=C\CCCCC)OC(=O)CCCCCCC/C=C\CCCCCC	0.290891	0.463158	0.520301	0.072705	0.0474618	0.0201482	IMPC_OFD_044_001___20	Open Field	Center distance travelled series	IMPC_OFD_044_001.20	19	20	20	20	significant	Different size	IMPC_OFD_044_001.20	_00180_42
22948	ONLI_0284	CSHPOS	Triacylglycerols	TAG 58:4; TAG 18:2-18:2-22:0;	OEWUGNNMLZAOCV-HESLGCGWSA-N	25240386	CCCCCCCCCCCCCCCCCCCCCC(=O)OC[C@@H](COC(=O)CCCCCCC/C=C\C/C=C\CCCCC)OC(=O)CCCCCCC/C=C\C/C=C\CCCCC	0.302814	0.518797	0.511278	0.0579307	0.0205599	0.0227216	IMPC_OFD_044_001___20	Open Field	Center distance travelled series	IMPC_OFD_044_001.20	20	20	20	20	significant	Different size	IMPC_OFD_044_001.20	_00180_47
25173	ONLI_0310	CSHPOS	Lineolic acids and derivatives	DAG 36:4; DAG 18:2-18:2;	MQGBAQLIFKSMEM-ZHARMHCNSA-N	9543729	CCCCC/C=C\C/C=C\CCCCCCCC(=O)OC[C@H](CO)OC(=O)CCCCCCC/C=C\C/C=C\CCCCC	0.41182	0.502256	0.521805	0.00873794	0.0255532	0.0197431	IMPC_OFD_044_001___20	Open Field	Center distance travelled series	IMPC_OFD_044_001.20	20	20	20	20	significant	Different size	IMPC_OFD_044_001.20	_00180_52
72366	ONLI_1017	HILICNEG	Tyrosine and derivatives	N-Acetyl-L-tyrosine	CAHKINHBCWCHCF-JTQLQIEISA-N	68310	CC(=O)N[C@@H](CC1=CC=C(C=C1)O)C(=O)O	0.555263	0.461654	0.649123	0.00030652	0.0419875	0.00332846	IMPC_OFD_044_001___5	Open Field	Center distance travelled series	IMPC_OFD_044_001.5	20	19	20	20	significant	Different size	IMPC_OFD_044_001.5	_00181_95
16856	ONLI_0218	CSHPOS	Phosphocholines	SMd40:2 A	FOULCGVQZYQEQM-DNXGLLHMSA-O	52931202	CCCCCCCCCCC/C=C/[C@H]([C@H](COP(=O)(O)OCC[N+](C)(C)C)NC(=O)CCCCCCCCCCCCC/C=C\CCCCCCCC)O	-0.240188	-0.506025	-0.600978	0.135473	0.0228197	0.00507171	IMPC_OFD_045_001___10	Open Field	Center resting time series	IMPC_OFD_045_001.10	20	20	20	20	significant	Different size	IMPC_OFD_045_001.10	_00182_47
46465	ONLI_0569	CSHNEG	Sphingomyelins	SM d34:2; SM d18:2/16:0;	YLWSJLLZUHSIEA-CKSUKHGVSA-N	52931235	CCCCCCCCCCCCCCCC(=O)N[C@@H](COP(=O)([O-])OCC[N+](C)(C)C)[C@@H](/C=C/CCCCCCCC/C=C\CCC)O	-0.210892	-0.48494	-0.46258	0.191467	0.0302222	0.0400053	IMPC_OFD_045_001___10	Open Field	Center resting time series	IMPC_OFD_045_001.10	20	20	20	20	significant	Different size	IMPC_OFD_045_001.10	_00182_164
25931	ONLI_0318	CSHPOS	Triacylglycerols	TAG 56:8; TAG 18:2-18:3-20:3;	MWPUONRBGFMSLE-FXGUSIRISA-N	131763293	CCCCC/C=C\C/C=C\CCCCCCCC(=O)OC[C@@H](COC(=O)CCCCCC/C=C\C/C=C\C/C=C\CCCCC)OC(=O)CCCC/C=C\C/C=C\C/C=C\CCCCC	0.431926	0.462517	0.459872	0.00538437	0.0400358	0.0413395	IMPC_OFD_045_001___5	Open Field	Center resting time series	IMPC_OFD_045_001.5	20	20	20	20	significant	Different size	IMPC_OFD_045_001.5	_00185_34
32642	ONLI_0388	CSHPOS	Triacylglycerols	TAG 40:0; TAG 12:0-14:0-14:0;	UGBCBXMLXHJYBS-UHFFFAOYSA-N	5127847	CCCCCCCCCCCCCC(=O)OCC(COC(=O)CCCCCCCCCCC)OC(=O)CCCCCCCCCCCCC	0.52247	0.480702	0.548872	0.000766152	0.0389093	0.0135073	IMPC_OFD_046_001___15	Open Field	Center permanence time series	IMPC_OFD_046_001.15	19	20	20	20	significant	Different size	IMPC_OFD_046_001.15	_00187_81
65644	ONLI_0854	HILICPOS	Glutamic acid and derivatives	Glutamic acid	WHUUTDBJXJRKMK-VKHMYHEASA-N	33032	C(CC(=O)O)[C@@H](C(=O)O)N	-0.195497	-0.661654	-0.452632	0.225852	0.00194129	0.0465754	IMPC_OFD_047_001___15	Open Field	Center average speed series	IMPC_OFD_047_001.15	20	20	20	20	significant	Different size	IMPC_OFD_047_001.15	_00191_145
72376	ONLI_1017	HILICNEG	Tyrosine and derivatives	N-Acetyl-L-tyrosine	CAHKINHBCWCHCF-JTQLQIEISA-N	68310	CC(=O)N[C@@H](CC1=CC=C(C=C1)O)C(=O)O	0.52718	0.482085	0.635175	0.000564183	0.0313546	0.00347683	IMPC_OFD_048_001___15	Open Field	Number of center entries series	IMPC_OFD_048_001.15	20	19	20	20	significant	Different size	IMPC_OFD_048_001.15	_00195_63
12260	ONLI_0169	CSHPOS	Triacylglycerols	TAG 53:5; TAG 17:1-18:2-18:2;	0	NA	0	0.374979	0.444531	0.466548	0.0171214	0.0495579	0.0381109	IMPC_OFD_048_001___20	Open Field	Number of center entries series	IMPC_OFD_048_001.20	20	20	20	20	significant	Different size	IMPC_OFD_048_001.20	_00196_16
13555	ONLI_0183	CSHPOS	Triacylglycerols	TAG 52:7; TAG 16:1-18:2-18:4;	CMQKNURFVKDTED-HQIPLBRRSA-N	131759572	CCCCCC/C=C\CCCCCCCC(=O)OC[C@@H](COC(=O)CCCC/C=C\C/C=C\C/C=C\C/C=C\CC)OC(=O)CCCCCCC/C=C\C/C=C\CCCCC	0.373284	0.4634	0.461255	0.01767	0.0396082	0.0406538	IMPC_OFD_048_001___20	Open Field	Number of center entries series	IMPC_OFD_048_001.20	20	20	20	20	significant	Different size	IMPC_OFD_048_001.20	_00196_20
19759	ONLI_0250	CSHPOS	Triacylglycerols	TAG 48:4; TAG 12:0-18:1-18:3;	0	NA	0	0.45086	0.51774	0.446132	0.00350379	0.0193775	0.0486463	IMPC_OFD_048_001___20	Open Field	Number of center entries series	IMPC_OFD_048_001.20	20	20	20	20	significant	Different size	IMPC_OFD_048_001.20	_00196_29
6090	ONLI_0071	gctof	Phenylpropanoic acids	hydrocinnamic acid	XMIIGOLPHOKFCH-UHFFFAOYSA-N	107	C1=CC=C(C=C1)CCC(=O)O	0.61133	0.687912	0.589286	0.000554167	0.00838258	0.0232481	TCP_TFL_001_001___1	Tail Flick	atency to tail flick	TCP_TFL_001_001.1	20	20	14	15	significant	Different size	TCP_TFL_001_001.1	_00206_14
14042	ONLI_0188	CSHPOS	Cholesterols and derivatives	Zymosterol	CGSJXLIKVBJVRY-XTGBIJOFSA-N	92746	C[C@H](CCC=C(C)C)[C@H]1CC[C@@H]2[C@@]1(CCC3=C2CC[C@@H]4[C@@]3(CC[C@@H](C4)O)C)C	-0.717576	-0.604396	-0.82395	1.17959e-05	0.0248902	0.000158882	TCP_TFL_001_001___3	Tail Flick	atency to tail flick	TCP_TFL_001_001.3	20	20	14	15	significant	Different size	TCP_TFL_001_001.3	_00208_21
25049	ONLI_0308	CSHPOS	Cholesteryl esters	CE (20:3)	MLPRJPSMAFZPLA-PJSAOELNSA-N	53477892	CCCCC/C=C\C/C=C\C/C=C\CCCCCCC(=O)O[C@H]1CC[C@@]2(C3CC[C@]4(C(C3CC=C2C1)CCC4[C@H](C)CCCC(C)C)C)C	-0.471733	-0.542857	-0.593387	0.00978178	0.047887	0.0197086	TCP_TFL_001_001___3	Tail Flick	atency to tail flick	TCP_TFL_001_001.3	20	20	14	15	significant	Different size	TCP_TFL_001_001.3	_00208_37
25536	ONLI_0314	CSHPOS	Cholesteryl esters	CE (18:2)	NAACPBBQTFFYQB-XHDSEGDBSA-N	131801653	CCCCC/C=C\C/C=C\CCCCCCCC(=O)O[C@H]1CC[C@@]2(C3CC[C@]4(C(C3CC=C2C1)CCC4[C@H](C)CCCC(C)C)C)C	-0.474689	-0.643956	-0.647007	0.00927115	0.0153782	0.00913166	TCP_TFL_001_001___3	Tail Flick	atency to tail flick	TCP_TFL_001_001.3	20	20	14	15	significant	Different size	TCP_TFL_001_001.3	_00208_39
31527	ONLI_0376	CSHPOS	Cholesteryl esters	CE ( 22:1)	SQHUGNAFKZZXOT-QXAJUEOOSA-N	16219158	CCCCCCCC/C=C\CCCCCCCCCCCC(=O)O[C@H]1CC[C@@]2([C@H]3CC[C@]4([C@H]([C@@H]3CC=C2C1)CC[C@@H]4[C@H](C)CCCC(C)C)C)C	-0.686045	-0.556044	-0.791779	3.98829e-05	0.0419772	0.000435347	TCP_TFL_001_001___3	Tail Flick	atency to tail flick	TCP_TFL_001_001.3	20	20	14	15	significant	Different size	TCP_TFL_001_001.3	_00208_49
3	ONLI_0003	gctof	Sugar alcohols	xylitol	HEBKCHPVOIAQTA-NGQZWQHPSA-N	6912	C([C@H](C([C@H](CO)O)O)O)O	0.290869	-0.813253	-0.47619	0.274417	0.0140865	0.243056	IMPC_ABR_001_001___1 point	Auditory Brain Stem Response	Body weight	IMPC_ABR_001_001	20	20	8	8	significant	Significant only in female	IMPC_ABR_001_001	_001_1
18	ONLI_0023	gctof	Pentoses	ribose	HMFHBZSHGGEWLO-SOOFDHNKSA-N	5779	C([C@@H]1[C@H]([C@H](C(O1)O)O)O)O	-0.0397351	-0.718576	-0.0714286	0.883839	0.0446226	0.881994	IMPC_ABR_001_001___1 point	Auditory Brain Stem Response	Body weight	IMPC_ABR_001_001	20	20	8	8	significant	Significant only in female	IMPC_ABR_001_001	_001_3
23	ONLI_0028	gctof	Nucleoside and nucleotide analogues	pseudo uridine	PTJWIQPHWPFNBW-GBNDHIKLSA-N	15047	C1=C(C(=O)NC(=O)N1)[C@H]2[C@@H]([C@@H]([C@H](O2)CO)O)O	-0.303164	-0.910196	0.238095	0.2537	0.00169086	0.582143	IMPC_ABR_001_001___1 point	Auditory Brain Stem Response	Body weight	IMPC_ABR_001_001	20	20	8	8	significant	Significant only in female	IMPC_ABR_001_001	_001_4
25	ONLI_0031	gctof	Medium-chain fatty acids	pimelic acid	WLJVNTCWHIRURA-UHFFFAOYSA-N	385	C(CCC(=O)O)CCC(=O)O	-0.0927153	-0.80241	-0.285714	0.732716	0.0165407	0.500794	IMPC_ABR_001_001___1 point	Auditory Brain Stem Response	Body weight	IMPC_ABR_001_001	20	20	8	8	significant	Significant only in female	IMPC_ABR_001_001	_001_5
59	ONLI_0070	gctof	Organonitrogen compounds	hydroxycarbamate NIST	DRAJWRKLRBNJRQ-UHFFFAOYSA-N	16639161	C(=O)(NO)O	-0.384106	-0.754505	-0.52381	0.141877	0.0305128	0.196627	IMPC_ABR_001_001___1 point	Auditory Brain Stem Response	Body weight	IMPC_ABR_001_001	20	20	8	8	significant	Significant only in female	IMPC_ABR_001_001	_001_9
72	ONLI_0086	gctof	Monosaccharide phosphates	glucose-1-phosphate	HXXFSFRBOHSIMQ-GASJEMHNSA-N	439165	C([C@@H]1[C@H]([C@@H]([C@H](C(O1)OP(=O)(O)O)O)O)O)O	-0.201619	-0.80241	-0.333333	0.453979	0.0165407	0.427877	IMPC_ABR_001_001___1 point	Auditory Brain Stem Response	Body weight	IMPC_ABR_001_001	20	20	8	8	significant	Significant only in female	IMPC_ABR_001_001	_001_10
75	ONLI_0089	gctof	Hexoses	fucose	SHZGCJCMOBCMKK-FPRJBGLDSA-N	439650	C[C@@H]1[C@@H]([C@@H]([C@H]([C@@H](O1)O)O)O)O	-0.236939	-0.838338	-0.0238095	0.376937	0.00932312	0.976786	IMPC_ABR_001_001___1 point	Auditory Brain Stem Response	Body weight	IMPC_ABR_001_001	20	20	8	8	significant	Significant only in female	IMPC_ABR_001_001	_001_11
78	ONLI_0092	gctof	Sugar alcohols	erythritol	UNXHWFMMPAWVPI-QWWZWVQMSA-N	169019	C([C@H]([C@@H](CO)O)O)O	0.703459	0.934148	-0.333333	0.00236163	0.000679106	0.427877	IMPC_ABR_001_001___1 point	Auditory Brain Stem Response	Body weight	IMPC_ABR_001_001	20	20	8	8	significant	Significant only in female	IMPC_ABR_001_001	_001_12
121	ONLI_0168	CSHPOS	Phosphatidylcholines	PC36:1	ATHVAWFAEPLPPQ-VRDBWYNSSA-N	24778825	CCCCCCCCCCCCCCCCCC(=O)OC[C@H](COP(=O)([O-])OCC[N+](C)(C)C)OC(=O)CCCCCCC/C=C\CCCCCCCC	0.850626	0.814386	0.119048	2.96943e-05	0.0138443	0.793006	IMPC_ABR_001_001___1 point	Auditory Brain Stem Response	Body weight	IMPC_ABR_001_001	20	20	8	8	significant	Significant only in female	IMPC_ABR_001_001	_001_17
151	ONLI_0199	CSHPOS	Triacylglycerols	TAG 48:3; TAG 14:0-16:0-18:3;	ROOGPSPBLOJPPQ-MMNSDLEGSA-N	131753281	CCCCCCCCCCCCCCCC(=O)O[C@@H](COC(=O)CCCCCCCCCCCCC)COC(=O)CCCC/C=C\C/C=C\C/C=C\CCCCC	0.752024	0.754505	-0.261905	0.000779003	0.0305128	0.536409	IMPC_ABR_001_001___1 point	Auditory Brain Stem Response	Body weight	IMPC_ABR_001_001	20	20	8	8	significant	Significant only in female	IMPC_ABR_001_001	_001_30
152	ONLI_0200	CSHPOS	Triacylglycerols	TAG 50:3; TAG 16:0-16:1-18:2;	HDFLQJUGWGNORO-NSVHLBAISA-N	131750350	CCCCCCCCCCCCCCCC(=O)OC[C@@H](COC(=O)CCCCCCC/C=C\C/C=C\CCCCC)OC(=O)CCCCCCC/C=C\CCCCCC	0.785872	0.766481	-0.333333	0.000307515	0.02652	0.427877	IMPC_ABR_001_001___1 point	Auditory Brain Stem Response	Body weight	IMPC_ABR_001_001	20	20	8	8	significant	Significant only in female	IMPC_ABR_001_001	_001_31
155	ONLI_0203	CSHPOS	Phosphatidylcholines	PC42:6	DSVRMAGYENFTLY-GDDYDVMSSA-N	52923651	CCCCC/C=C\C/C=C\CCCCCCCCCC(=O)O[C@H](COC(=O)CCCCC/C=C\C/C=C\C/C=C\C/C=C\CCCCC)COP(=O)([O-])OCC[N+](C)(C)C	0.927153	0.814386	0.619048	2.40409e-07	0.0138443	0.11498	IMPC_ABR_001_001___1 point	Auditory Brain Stem Response	Body weight	IMPC_ABR_001_001	20	20	8	8	significant	Significant only in female	IMPC_ABR_001_001	_001_33
171	ONLI_0222	CSHPOS	Cholesteryl esters	CE (18:3)	FYMCIBHUFSIWCE-KNWYFNKZSA-N	131801659	CC/C=C\C/C=C\C/C=C\CCCCCCCC(=O)O[C@H]1CC[C@@]2(C3CC[C@]4(C(C3CC=C2C1)CCC4[C@H](C)CCCC(C)C)C)C	0.865342	0.814386	0.166667	1.49673e-05	0.0138443	0.703323	IMPC_ABR_001_001___1 point	Auditory Brain Stem Response	Body weight	IMPC_ABR_001_001	20	20	8	8	significant	Significant only in female	IMPC_ABR_001_001	_001_41
181	ONLI_0232	CSHPOS	Triacylglycerols	TAG 52:6; TAG 16:0-16:1-20:5;	CCDSJNBGVOSHIH-OFLVPTCNSA-N	131755156	CCCCCCCCCCCCCCCC(=O)OC[C@@H](COC(=O)CCC/C=C\C/C=C\C/C=C\C/C=C\C/C=C\CC)OC(=O)CCCCCCC/C=C\CCCCCC	0.771155	0.80241	0.190476	0.000469399	0.0165407	0.664583	IMPC_ABR_001_001___1 point	Auditory Brain Stem Response	Body weight	IMPC_ABR_001_001	20	20	8	8	significant	Significant only in female	IMPC_ABR_001_001	_001_47
193	ONLI_0245	CSHPOS	Triacylglycerols	TAG 50:3; TAG 16:0-16:0-18:3;	WLFXGZDFDKIDIL-MXPUMGEASA-N	131750534	CCCCCCCCCCCCCCCC(=O)OC[C@@H](COC(=O)CCCCCCC/C=C\C/C=C\C/C=C\CC)OC(=O)CCCCCCCCCCCCCCC	0.752024	0.754505	-0.261905	0.000779003	0.0305128	0.536409	IMPC_ABR_001_001___1 point	Auditory Brain Stem Response	Body weight	IMPC_ABR_001_001	20	20	8	8	significant	Significant only in female	IMPC_ABR_001_001	_001_49
213	ONLI_0267	CSHPOS	Triacylglycerols	TAG 48:0; TAG 14:0-16:0-18:0;	JTDPHURHZMZJHD-DYVQZXGMSA-N	131753268	CCCCCCCCCCCCCCCCCC(=O)OC[C@H](COC(=O)CCCCCCCCCCCCC)OC(=O)CCCCCCCCCCCCCCC	0.278146	0.754505	-0.190476	0.296903	0.0305128	0.664583	IMPC_ABR_001_001___1 point	Auditory Brain Stem Response	Body weight	IMPC_ABR_001_001	20	20	8	8	significant	Significant only in female	IMPC_ABR_001_001	_001_61
215	ONLI_0269	CSHPOS	Triacylglycerols	TAG 46:0; TAG 14:0-16:0-16:0;	JWVXCFSNEOMSHH-DXQCBLCSSA-N	91867460	CCCCCCCCCCCCCCCC(=O)OC[C@H](COC(=O)CCCCCCCCCCCCC)OC(=O)CCCCCCCCCCCCCCC	0.618102	0.89822	-0.142857	0.0107135	0.0024388	0.752034	IMPC_ABR_001_001___1 point	Auditory Brain Stem Response	Body weight	IMPC_ABR_001_001	20	20	8	8	significant	Significant only in female	IMPC_ABR_001_001	_001_62
217	ONLI_0271	CSHPOS	Ceramides	Cer d40:1	CJROVRTUSFQVMR-GVOPMEMSSA-N	5283570	CCCCCCCCCCCCCCCCCCCCCCCCCC(=O)N[C@@H](CO)[C@@H](/C=C/CCCCCCCCCCCCC)O	0.871229	0.790433	0.214286	1.11259e-05	0.0195445	0.619097	IMPC_ABR_001_001___1 point	Auditory Brain Stem Response	Body weight	IMPC_ABR_001_001	20	20	8	8	significant	Significant only in female	IMPC_ABR_001_001	_001_63
223	ONLI_0277	CSHPOS	Phosphatidylcholines	PC38:3	KNNHXKQRTYEWCA-HYYWERRFSA-N	53478919	CCCCCC/C=C\CCCCCCCCCC(=O)O[C@H](COC(=O)CCCCCCCCC/C=C\C/C=C\CCCCC)COP(=O)([O-])OCC[N+](C)(C)C	0.796174	0.754505	-0.119048	0.000224276	0.0305128	0.793006	IMPC_ABR_001_001___1 point	Auditory Brain Stem Response	Body weight	IMPC_ABR_001_001	20	20	8	8	significant	Significant only in female	IMPC_ABR_001_001	_001_66
250	ONLI_0308	CSHPOS	Cholesteryl esters	CE (20:3)	MLPRJPSMAFZPLA-PJSAOELNSA-N	53477892	CCCCC/C=C\C/C=C\C/C=C\CCCCCCC(=O)O[C@H]1CC[C@@]2(C3CC[C@]4(C(C3CC=C2C1)CCC4[C@H](C)CCCC(C)C)C)C	0.668139	0.718576	-0.428571	0.00467035	0.0446226	0.299206	IMPC_ABR_001_001___1 point	Auditory Brain Stem Response	Body weight	IMPC_ABR_001_001	20	20	8	8	significant	Significant only in female	IMPC_ABR_001_001	_001_80
287	ONLI_0346	CSHPOS	Phosphatidylcholines	PC 32:1; PC 16:0-16:1;	QIBZFHLFHCIUOT-NPBIGWJUSA-N	6443788	CCCCCCCCCCCCCCCC(=O)OC[C@H](COP(=O)([O-])OCC[N+](C)(C)C)OC(=O)CCCCCCC/C=C\CCCCCC	0.816777	0.730552	-0.0952381	0.000112789	0.0395556	0.840129	IMPC_ABR_001_001___1 point	Auditory Brain Stem Response	Body weight	IMPC_ABR_001_001	20	20	8	8	significant	Significant only in female	IMPC_ABR_001_001	_001_99
295	ONLI_0354	CSHPOS	1,2-aminoalcohols	Heptadecasphing-4-enine	RBEJCQPPFCKTRZ-LHMZYYNSSA-N	5283557	CCCCCCCCCCCC/C=C/[C@H]([C@H](CO)N)O	0.139809	0.826362	0.47619	0.605562	0.0114428	0.243056	IMPC_ABR_001_001___1 point	Auditory Brain Stem Response	Body weight	IMPC_ABR_001_001	20	20	8	8	significant	Significant only in female	IMPC_ABR_001_001	_001_106
310	ONLI_0371	CSHPOS	1-acyl-sn-glycero-3-phosphocholines	LPC 24:0	SKJMUADLQLZAGH-WJOKGBTCSA-N	24779481	CCCCCCCCCCCCCCCCCCCCCCCC(=O)OC[C@H](COP(=O)([O-])OCC[N+](C)(C)C)O	0.619573	0.754505	0.0714286	0.0104753	0.0305128	0.881994	IMPC_ABR_001_001___1 point	Auditory Brain Stem Response	Body weight	IMPC_ABR_001_001	20	20	8	8	significant	Significant only in female	IMPC_ABR_001_001	_001_111
314	ONLI_0375	CSHPOS	Phosphatidylcholines	PC36:6	SPWBDEZMKCRQSX-NGPPOSSDSA-N	52922847	CCCCC/C=C\C/C=C\C/C=C\CCCCC(=O)O[C@H](COC(=O)CCCCCCC/C=C\C/C=C\C/C=C\CC)COP(=O)([O-])OCC[N+](C)(C)C	0.899191	0.874267	0.404762	2.16533e-06	0.00451239	0.326835	IMPC_ABR_001_001___1 point	Auditory Brain Stem Response	Body weight	IMPC_ABR_001_001	20	20	8	8	significant	Significant only in female	IMPC_ABR_001_001	_001_113
328	ONLI_0390	CSHPOS	1-acyl-sn-glycero-3-phosphocholines	LPC 22:0	UIINDYGXBHJQHX-GDLZYMKVSA-N	24779479	CCCCCCCCCCCCCCCCCCCCCC(=O)OC[C@H](COP(=O)([O-])OCC[N+](C)(C)C)O	0.735835	0.80241	0.190476	0.00115678	0.0165407	0.664583	IMPC_ABR_001_001___1 point	Auditory Brain Stem Response	Body weight	IMPC_ABR_001_001	20	20	8	8	significant	Significant only in female	IMPC_ABR_001_001	_001_120
340	ONLI_0402	CSHPOS	1-acyl-sn-glycero-3-phosphocholines	LPC 14:0	VXUOFDJKYGDUJI-OAQYLSRUSA-N	460604	CCCCCCCCCCCCCC(=O)OC[C@H](COP(=O)([O-])OCC[N+](C)(C)C)O	0.473878	0.766481	-0.261905	0.0636965	0.02652	0.536409	IMPC_ABR_001_001___1 point	Auditory Brain Stem Response	Body weight	IMPC_ABR_001_001	20	20	8	8	significant	Significant only in female	IMPC_ABR_001_001	_001_125
369	ONLI_0432	CSHPOS	Cholesteryl esters	CE (20:5)	XZFUGMCJZFRBKF-JIKDAPOUSA-N	53477889	CC/C=C\C/C=C\C/C=C\C/C=C\C/C=C\CCCC(=O)O[C@H]1CC[C@@]2(C3CC[C@]4(C(C3CC=C2C1)CCC4[C@H](C)CCCC(C)C)C)C	0.819721	0.89822	-0.0952381	0.000101543	0.0024388	0.840129	IMPC_ABR_001_001___1 point	Auditory Brain Stem Response	Body weight	IMPC_ABR_001_001	20	20	8	8	significant	Significant only in female	IMPC_ABR_001_001	_001_138
370	ONLI_0433	CSHPOS	1-acyl-sn-glycero-3-phosphocholines	LPC 18:1	YAMUFBLWGFFICM-PTGWMXDISA-N	16081932	CCCCCCCC/C=C\CCCCCCCC(=O)OC[C@H](COP(=O)([O-])OCC[N+](C)(C)C)O	0.769684	0.730552	-0.0952381	0.000488859	0.0395556	0.840129	IMPC_ABR_001_001___1 point	Auditory Brain Stem Response	Body weight	IMPC_ABR_001_001	20	20	8	8	significant	Significant only in female	IMPC_ABR_001_001	_001_139
383	ONLI_0447	CSHPOS	1-acyl-sn-glycero-3-phosphoethanolamines	LPE 16:0	YVYMBNSKXOXSKW-HXUWFJFHSA-N	9547069	CCCCCCCCCCCCCCCC(=O)OC[C@H](COP(=O)(O)OCCN)O	0.68727	0.730552	0.261905	0.00326453	0.0395556	0.536409	IMPC_ABR_001_001___1 point	Auditory Brain Stem Response	Body weight	IMPC_ABR_001_001	20	20	8	8	significant	Significant only in female	IMPC_ABR_001_001	_001_147
384	ONLI_0448	CSHPOS	Phosphatidylcholines	PC34:4	YWDDIWXKFJEMKF-JTZVLWBESA-N	52922891	CCCCCCCCCCCCCCCC(=O)O[C@H](COC(=O)CCCC/C=C\C/C=C\C/C=C\C/C=C\CC)COP(=O)([O-])OCC[N+](C)(C)C	0.725534	0.730552	-0.214286	0.00146692	0.0395556	0.619097	IMPC_ABR_001_001___1 point	Auditory Brain Stem Response	Body weight	IMPC_ABR_001_001	20	20	8	8	significant	Significant only in female	IMPC_ABR_001_001	_001_148
396	ONLI_0473	CSHNEG	Long-chain fatty acids	FA 13:0	SZHOJFHSIKHZHA-UHFFFAOYSA-N	12530	CCCCCCCCCCCCC(=O)O	-0.144224	-0.754505	0.238095	0.594104	0.0305128	0.582143	IMPC_ABR_001_001___1 point	Auditory Brain Stem Response	Body weight	IMPC_ABR_001_001	20	20	8	8	significant	Significant only in female	IMPC_ABR_001_001	_001_153
418	ONLI_0497	CSHNEG	Medium-chain fatty acids	FAHFA 24:0; FAHFA 16:0/8:0;	JFADBWKNFGCNQI-UHFFFAOYSA-N	138184454	CCCCCCCCCCCCCCCC(=O)OC(CCC)CCCC(=O)O	-0.119205	0.754505	0.333333	0.660143	0.0305128	0.427877	IMPC_ABR_001_001___1 point	Auditory Brain Stem Response	Body weight	IMPC_ABR_001_001	20	20	8	8	significant	Significant only in female	IMPC_ABR_001_001	_001_161
447	ONLI_0549	CSHNEG	Ceramides	Cer-NS d43:1; Cer-NS d19:1/24:0;	KSYIVRBEJSMJMX-PVNBSDFKSA-N	134745021	CCCCCCCCCCCCCCCCCCCCCCCC(=O)N[C@@H](CO)[C@@H](/C=C/CCCCCCCCCCCCCC)O	-0.0603385	0.742528	0.047619	0.824332	0.034855	0.934871	IMPC_ABR_001_001___1 point	Auditory Brain Stem Response	Body weight	IMPC_ABR_001_001	20	20	8	8	significant	Significant only in female	IMPC_ABR_001_001	_001_174
518	ONLI_0635	CSHNEG	1-alkyl,2-acylglycero-3-phosphocholines	PC 38:4e; PC 18:0e/20:4;	GBNPCIWXLWZJGA-IGBSIYCFSA-N	6443065	CCCCCCCCCCCCCCCCCCOC[C@H](COP(=O)([O-])OCC[N+](C)(C)C)OC(=O)CCC/C=C\C/C=C\C/C=C\C/C=C\CCCCC	0.394408	0.730552	0.333333	0.130604	0.0395556	0.427877	IMPC_ABR_001_001___1 point	Auditory Brain Stem Response	Body weight	IMPC_ABR_001_001	20	20	8	8	significant	Significant only in female	IMPC_ABR_001_001	_001_215
522	ONLI_0641	CSHNEG	Phosphatidylinositols	PI 36:3; PI 18:1-18:2;	MXJMOLQIXMJUEL-PEAJWMICSA-N	52928384	CCCCCCCC/C=C\CCCCCCCC(=O)OC[C@H](COP(=O)(O)OC1C([C@@H](C(C(C1O)O)O)O)O)OC(=O)CCCCCCC/C=C\C/C=C\CCCCC	0.908021	0.778457	0.52381	1.16767e-06	0.0228673	0.196627	IMPC_ABR_001_001___1 point	Auditory Brain Stem Response	Body weight	IMPC_ABR_001_001	20	20	8	8	significant	Significant only in female	IMPC_ABR_001_001	_001_218
539	ONLI_0663	CSHNEG	Phosphatidylcholines	PC 38:1; PC 20:0-18:1;	IKNYBQRADNMEDT-FHLWKLDVSA-N	24779038	CCCCCCCCCCCCCCCCCCCC(=O)OC[C@H](COP(=O)([O-])OCC[N+](C)(C)C)OC(=O)CCCCCCC/C=C\CCCCCCCC	0.878587	0.778457	0.285714	7.52121e-06	0.0228673	0.500794	IMPC_ABR_001_001___1 point	Auditory Brain Stem Response	Body weight	IMPC_ABR_001_001	20	20	8	8	significant	Significant only in female	IMPC_ABR_001_001	_001_224
587	ONLI_0750	HILICPOS	Dipeptides	Lys-Val	YQAIUOWPSUOINN-UHFFFAOYSA-N	140709	CC(C)C(C(=O)O)NC(=O)C(CCCCN)N	-0.00441501	-0.742528	-0.119048	0.987053	0.034855	0.793006	IMPC_ABR_001_001___1 point	Auditory Brain Stem Response	Body weight	IMPC_ABR_001_001	20	20	8	8	significant	Significant only in female	IMPC_ABR_001_001	_001_237
779	ONLI_1161	Oxylipins	Hydroxyeicosatetraenoic acids	15-HETE	JSFATNQSLKRBCI-VAEKSGALSA-N	5280724	CCCCC[C@@H](/C=C/C=C\C/C=C\C/C=C\CCCC(=O)O)O	-0.172185	-0.778457	-0.0714286	0.523693	0.0228673	0.881994	IMPC_ABR_001_001___1 point	Auditory Brain Stem Response	Body weight	IMPC_ABR_001_001	20	20	8	8	significant	Significant only in female	IMPC_ABR_001_001	_001_250
780	ONLI_1162	Oxylipins	Hydroxyeicosatetraenoic acids	12S-HETE	ZNHVWPKMFKADKW-LQWMCKPYSA-N	5283155	CCCCC/C=C\C[C@@H](/C=C/C=C\C/C=C\CCCC(=O)O)O	-0.0647535	-0.850315	0.214286	0.811685	0.00747141	0.619097	IMPC_ABR_001_001___1 point	Auditory Brain Stem Response	Body weight	IMPC_ABR_001_001	20	20	8	8	significant	Significant only in female	IMPC_ABR_001_001	_001_251
781	ONLI_1163	Oxylipins	Hydroxyeicosatetraenoic acids	8S-HETE	NLUNAYAEIJYXRB-VYOQERLCSA-N	5283154	CCCCC/C=C\C/C=C\C=C\[C@H](C/C=C\CCCC(=O)O)O	-0.34757	-0.742528	-0.190476	0.187141	0.034855	0.664583	IMPC_ABR_001_001___1 point	Auditory Brain Stem Response	Body weight	IMPC_ABR_001_001	20	20	8	8	significant	Significant only in female	IMPC_ABR_001_001	_001_252
782	ONLI_1164	Oxylipins	Hydroxyeicosatetraenoic acids	11-HETE	GCZRCCHPLVMMJE-RSPKXIRXSA-N	5312981	CCCCC/C=C\C=C/[C@@H](C/C=C\C/C=C/CCCC(=O)O)O	-0.257732	-0.771084	-0.0952381	0.335188	0.0250763	0.840129	IMPC_ABR_001_001___1 point	Auditory Brain Stem Response	Body weight	IMPC_ABR_001_001	20	20	8	8	significant	Significant only in female	IMPC_ABR_001_001	_001_253
1	ONLI_0001	gctof	Pentoses	xylulose NIST	LQXVFWRQNMEDEE-PYHARJCCSA-N	439205	C1[C@@H]([C@H](C(O1)(CO)O)O)O	-0.48671	-0.912871	-0.398647	0.0558933	0.00154742	0.327953	IMPC_ABR_004_001___1 point	Auditory Brain Stem Response	6kHz-evoked ABR Threshold	IMPC_ABR_004_001	20	20	8	8	significant	Significant only in female	IMPC_ABR_004_001	_003_1
62	ONLI_0073	gctof	Glucuronic acid derivatives	hexuronic acid	IAJILQKETJEXLJ-RSJOWCBRSA-N	84740	C(=O)[C@@H]([C@H]([C@H]([C@@H](C(=O)O)O)O)O)O	0.201846	0.756379	-0.123718	0.45346	0.0298651	0.770385	IMPC_ABR_004_001___1 point	Auditory Brain Stem Response	6kHz-evoked ABR Threshold	IMPC_ABR_004_001	20	20	8	8	significant	Significant only in female	IMPC_ABR_004_001	_003_8
79	ONLI_0093	gctof	Fatty alcohols	dodecanol	LQZZUXJYWNFBMV-UHFFFAOYSA-N	8193	CCCCCCCCCCCCO	-0.209985	-0.717256	0.123718	0.435055	0.0452038	0.770385	IMPC_ABR_004_001___1 point	Auditory Brain Stem Response	6kHz-evoked ABR Threshold	IMPC_ABR_004_001	20	20	8	8	significant	Significant only in female	IMPC_ABR_004_001	_003_9
87	ONLI_0103	gctof	Medium-chain fatty acids	capric acid	GHVNFZFCNZKVNT-UHFFFAOYSA-N	2969	CCCCCCCCCC(=O)O	-0.426482	-0.821584	-0.151211	0.0994894	0.0123664	0.720772	IMPC_ABR_004_001___1 point	Auditory Brain Stem Response	6kHz-evoked ABR Threshold	IMPC_ABR_004_001	20	20	8	8	significant	Significant only in female	IMPC_ABR_004_001	_003_12
92	ONLI_0111	gctof	Alpha amino acids	alpha-aminoadipic acid	OYIFNHCXNCRBQI-UHFFFAOYSA-N	469	C(CC(C(=O)O)N)CC(=O)O	0.133479	0.847666	-0.3849	0.622139	0.00785861	0.346422	IMPC_ABR_004_001___1 point	Auditory Brain Stem Response	6kHz-evoked ABR Threshold	IMPC_ABR_004_001	20	20	8	8	significant	Significant only in female	IMPC_ABR_004_001	_003_13
104	ONLI_0124	gctof	Short-chain hydroxy acids and derivatives	2-hydroxyglutaric acid	HWXBTNAVRSUOJR-VKHMYHEASA-N	439939	C(CC(=O)O)[C@@H](C(=O)O)O	0.0309281	0.717256	-0.302422	0.909473	0.0452038	0.466585	IMPC_ABR_004_001___1 point	Auditory Brain Stem Response	6kHz-evoked ABR Threshold	IMPC_ABR_004_001	20	20	8	8	significant	Significant only in female	IMPC_ABR_004_001	_003_15
2211	ONLI_0275	CSHPOS	Phosphatidylcholines	PC16:0/16:0	KILNVBDSWZSGLL-KXQOOQHDSA-N	452110	CCCCCCCCCCCCCCCC(=O)OC[C@H](COP(=O)([O-])OCC[N+](C)(C)C)OC(=O)CCCCCCCCCCCCCCC	-0.26533	-0.717256	0.0687322	0.320622	0.0452038	0.871532	IMPC_ABR_004_001___1 point	Auditory Brain Stem Response	6kHz-evoked ABR Threshold	IMPC_ABR_004_001	20	20	8	8	significant	Significant only in female	IMPC_ABR_004_001	_003_18
257	ONLI_0316	CSHPOS	Phosphosphingolipids	SMd36:2	NBEADXWAAWCCDG-QDDWGVBQSA-N	6443882	CCCCCCCCCCCCC/C=C/[C@H]([C@H](COP(=O)([O-])OCC[N+](C)(C)C)NC(=O)CCCCCCC/C=C\CCCCCCCC)O	-0.109062	-0.717256	-0.302422	0.687637	0.0452038	0.466585	IMPC_ABR_004_001___1 point	Auditory Brain Stem Response	6kHz-evoked ABR Threshold	IMPC_ABR_004_001	20	20	8	8	significant	Significant only in female	IMPC_ABR_004_001	_003_20
2731	ONLI_0332	CSHPOS	Phosphatidylcholines	PC35:4	ZSWHHKKYMMYPPD-MSZSINMWSA-N	52922330	CCCCCCCCCCCCCCC(=O)OC[C@H](COP(=O)([O-])OCC[N+](C)(C)C)OC(=O)CCC/C=C\C/C=C\C/C=C\C/C=C\CCCCC	0.0423226	0.730297	-0.0687322	0.876327	0.0396598	0.871532	IMPC_ABR_004_001___1 point	Auditory Brain Stem Response	6kHz-evoked ABR Threshold	IMPC_ABR_004_001	20	20	8	8	significant	Significant only in female	IMPC_ABR_004_001	_003_21
283	ONLI_0342	CSHPOS	Phosphatidylcholines	PC34:0	PZNPLUBHRSSFHT-RRHRGVEJSA-N	24778686	CCCCCCCCCCCCCCCCCC(=O)O[C@H](COC(=O)CCCCCCCCCCCCCCC)COP(=O)([O-])OCC[N+](C)(C)C	-0.205102	-0.821584	0.109971	0.446051	0.0123664	0.79546	IMPC_ABR_004_001___1 point	Auditory Brain Stem Response	6kHz-evoked ABR Threshold	IMPC_ABR_004_001	20	20	8	8	significant	Significant only in female	IMPC_ABR_004_001	_003_22
5001	ONLI_0609	CSHNEG	1-alkyl,2-acylglycero-3-phosphocholines	PC 36:2e; PC 18:0e/18:2;	LMGTVCKIUNTOEP-HJTCUGKVSA-N	6443070	CCCCCCCCCCCCCCCCCCOC[C@H](COP(=O)([O-])OCC[N+](C)(C)C)OC(=O)CCCCCCC/C=C\C/C=C\CCCCC	-0.335325	-0.847666	0.343661	0.20421	0.00785861	0.404572	IMPC_ABR_004_001___1 point	Auditory Brain Stem Response	6kHz-evoked ABR Threshold	IMPC_ABR_004_001	20	20	8	8	significant	Significant only in female	IMPC_ABR_004_001	_003_24
519	ONLI_0637	CSHNEG	Glycosyl-N-acylsphingosines	GlcCerd18:14E/24:0	POQRWMRXUOPCLD-AAAFHMTMSA-N	6321361	CCCCCCCCCCCCCCCCCCCCCCCC(=O)N[C@@H](CO[C@H]1C(C([C@@H]([C@H](O1)CO)O)O)O)[C@@H](/C=C/CCCCCCCCCCCCC)O	-0.047206	-0.730297	0.536111	0.862178	0.0396598	0.170792	IMPC_ABR_004_001___1 point	Auditory Brain Stem Response	6kHz-evoked ABR Threshold	IMPC_ABR_004_001	20	20	8	8	significant	Significant only in female	IMPC_ABR_004_001	_003_26
541	ONLI_0665	CSHNEG	Phosphatidylcholines	PC 40:6; PC 18:0-22:6;	FAUYAENFVCNTAL-PFFNLMTBSA-N	24778876	CCCCCCCCCCCCCCCCCC(=O)OC[C@H](COP(=O)([O-])OCC[N+](C)(C)C)OC(=O)CC/C=C\C/C=C\C/C=C\C/C=C\C/C=C\C/C=C\CC	-0.494849	-0.847666	-0.0824786	0.0513247	0.00785861	0.846053	IMPC_ABR_004_001___1 point	Auditory Brain Stem Response	6kHz-evoked ABR Threshold	IMPC_ABR_004_001	20	20	8	8	significant	Significant only in female	IMPC_ABR_004_001	_003_27
546	ONLI_0670	CSHNEG	Phosphatidylinositols	PI 38:3; PI 18:0-20:3;	ZUGLBBVIAIBIKG-BZXCBJNASA-N	52928308	CCCCCCCCCCCCCCCCCC(=O)OC[C@H](COP(=O)(O)OC1C([C@@H](C(C(C1O)O)O)O)O)OC(=O)CCCCCC/C=C\C/C=C\C/C=C\CCCCC	-0.312536	-0.717256	0.0687322	0.238577	0.0452038	0.871532	IMPC_ABR_004_001___1 point	Auditory Brain Stem Response	6kHz-evoked ABR Threshold	IMPC_ABR_004_001	20	20	8	8	significant	Significant only in female	IMPC_ABR_004_001	_003_28
570	ONLI_0720	HILICPOS	Dipeptides	Arg-Ser	IJYZHIOOBGIINM-UHFFFAOYSA-N	9943142	C(CC(C(=O)NC(CO)C(=O)O)N)CN=C(N)N	0.380858	0.87831	0.111803	0.247849	0.0213116	0.857945	IMPC_ABR_004_001___1 point	Auditory Brain Stem Response	6kHz-evoked ABR Threshold	IMPC_ABR_004_001	13	11	8	8	significant	Significant only in female	IMPC_ABR_004_001	_003_31
6211	ONLI_0809	HILICPOS	Pyrimidine nucleosides	N-Acetylcytidine	NIDVTARKFBZMOT-PEBGCTIMSA-N	107461	CC(=O)NC1=NC(=O)N(C=C1)[C@H]2[C@@H]([C@@H]([C@H](O2)CO)O)O	0.302769	0.730297	-0.316168	0.25435	0.0396598	0.445506	IMPC_ABR_004_001___1 point	Auditory Brain Stem Response	6kHz-evoked ABR Threshold	IMPC_ABR_004_001	20	20	8	8	significant	Significant only in female	IMPC_ABR_004_001	_003_35
6241	ONLI_0812	HILICPOS	Leucine and derivatives	N-Methylleucine	XJODGRWDFZVTKW-LURJTMIESA-N	2777993	CC(C)C[C@@H](C(=O)O)NC	-0.268586	-0.912871	-0.439886	0.314495	0.00154742	0.275435	IMPC_ABR_004_001___1 point	Auditory Brain Stem Response	6kHz-evoked ABR Threshold	IMPC_ABR_004_001	20	20	8	8	significant	Significant only in female	IMPC_ABR_004_001	_003_37
627	ONLI_0815	HILICPOS	Retinoids	Retinoic acid	SHGAZHPCJJPHSC-YCNIQYBTSA-N	444795	CC1=C(C(CCC1)(C)C)/C=C/C(=C/C=C/C(=C/C(=O)O)/C)/C	-0.329596	-0.796819	0	0.27145	0.0319282	1	IMPC_ABR_004_001___1 point	Auditory Brain Stem Response	6kHz-evoked ABR Threshold	IMPC_ABR_004_001	16	16	8	8	significant	Significant only in female	IMPC_ABR_004_001	_003_38
682	ONLI_0889	HILICPOS	5'-deoxy-5'-thionucleosides	S-Adenosyl-homocysteine	ZJUKTBDSGOFHSH-WFMPWKQPSA-N	439155	C1=NC(=C2C(=N1)N(C=N2)[C@H]3[C@@H]([C@@H]([C@H](O3)CSCC[C@@H](C(=O)O)N)O)O)N	0.139801	0.866025	-0.3849	0.619241	0.0117248	0.346422	IMPC_ABR_004_001___1 point	Auditory Brain Stem Response	6kHz-evoked ABR Threshold	IMPC_ABR_004_001	16	18	8	8	significant	Significant only in female	IMPC_ABR_004_001	_003_43
799	ONLI_1186	Oxylipins	Hepoxilins	11,12-EpETrE	DXOYQVHGIODESM-IQCOFVSKSA-N	53480479	CCCCC/C=C/CC1C(O1)C/C=C\C/C=C/CCCC(=O)O	0.171859	0.821584	-0.532416	0.524494	0.0123664	0.174329	IMPC_ABR_004_001___1 point	Auditory Brain Stem Response	6kHz-evoked ABR Threshold	IMPC_ABR_004_001	20	20	8	8	significant	Significant only in female	IMPC_ABR_004_001	_003_54
31	ONLI_0003	gctof	Sugar alcohols	xylitol	HEBKCHPVOIAQTA-NGQZWQHPSA-N	6912	C([C@H](C([C@H](CO)O)O)O)O	0.476318	0.747802	-0.0521641	0.0621545	0.0328992	0.90237	IMPC_ABR_006_001___1 point	Auditory Brain Stem Response	12kHz-evoked ABR Threshold	IMPC_ABR_006_001	20	20	8	8	significant	Significant only in female	IMPC_ABR_006_001	_004_1
5	ONLI_0006	gctof	Xanthines	uric acid	LEHOTFFKMJEONL-UHFFFAOYSA-N	1175	C12=C(NC(=O)N1)NC(=O)NC2=O	0.210819	0.860707	-0.0486299	0.433193	0.00607042	0.908963	IMPC_ABR_006_001___1 point	Auditory Brain Stem Response	12kHz-evoked ABR Threshold	IMPC_ABR_006_001	20	20	8	8	significant	Significant only in female	IMPC_ABR_006_001	_004_2
231	ONLI_0028	gctof	Nucleoside and nucleotide analogues	pseudo uridine	PTJWIQPHWPFNBW-GBNDHIKLSA-N	15047	C1=C(C(=O)NC(=O)N1)[C@H]2[C@@H]([C@@H]([C@H](O2)CO)O)O	0.0424831	0.756379	-0.0912871	0.875862	0.0298651	0.829785	IMPC_ABR_006_001___1 point	Auditory Brain Stem Response	12kHz-evoked ABR Threshold	IMPC_ABR_006_001	20	20	8	8	significant	Significant only in female	IMPC_ABR_006_001	_004_5
255	ONLI_0031	gctof	Medium-chain fatty acids	pimelic acid	WLJVNTCWHIRURA-UHFFFAOYSA-N	385	C(CCC(=O)O)CCC(=O)O	0.756828	0.860707	0.665092	0.000688854	0.00607042	0.0719026	IMPC_ABR_006_001___1 point	Auditory Brain Stem Response	12kHz-evoked ABR Threshold	IMPC_ABR_006_001	20	20	8	8	significant	Significant only in female	IMPC_ABR_006_001	_004_6
40	ONLI_0049	gctof	Hexoses	mannose	WQZGKKKJIJFFOK-QTVWNMPRSA-N	18950	C([C@@H]1[C@H]([C@@H]([C@@H](C(O1)O)O)O)O)O	0.245458	0.730297	-0.182574	0.359501	0.0396598	0.665205	IMPC_ABR_006_001___1 point	Auditory Brain Stem Response	12kHz-evoked ABR Threshold	IMPC_ABR_006_001	20	20	8	8	significant	Significant only in female	IMPC_ABR_006_001	_004_8
41	ONLI_0050	gctof	O-glycosyl compounds	maltose	GUBGYTABKSRVRQ-DKBJLJRDSA-N	10991489	C([C@@H]1[C@H]([C@@H]([C@H]([C@H](O1)O[C@@H]2[C@H](O[C@@H]([C@H]([C@H]2O)O)O)CO)O)O)O)O	0.462594	0.717256	0.182574	0.0711935	0.0452038	0.665205	IMPC_ABR_006_001___1 point	Auditory Brain Stem Response	12kHz-evoked ABR Threshold	IMPC_ABR_006_001	20	20	8	8	significant	Significant only in female	IMPC_ABR_006_001	_004_9
52	ONLI_0063	gctof	Tricarboxylic acids and derivatives	isocitric acid	ODBLHEXUDAPZAU-UHFFFAOYSA-N	1198	C(C(C(C(=O)O)O)C(=O)O)C(=O)O	0.404376	0.730297	0.039123	0.120298	0.0396598	0.926719	IMPC_ABR_006_001___1 point	Auditory Brain Stem Response	12kHz-evoked ABR Threshold	IMPC_ABR_006_001	20	20	8	8	significant	Significant only in female	IMPC_ABR_006_001	_004_10
751	ONLI_0089	gctof	Hexoses	fucose	SHZGCJCMOBCMKK-FPRJBGLDSA-N	439650	C[C@@H]1[C@@H]([C@@H]([C@H]([C@@H](O1)O)O)O)O	0.333571	0.76942	0.0652051	0.206735	0.0255925	0.878087	IMPC_ABR_006_001___1 point	Auditory Brain Stem Response	12kHz-evoked ABR Threshold	IMPC_ABR_006_001	20	20	8	8	significant	Significant only in female	IMPC_ABR_006_001	_004_14
783	ONLI_0092	gctof	Sugar alcohols	erythritol	UNXHWFMMPAWVPI-QWWZWVQMSA-N	169019	C([C@H]([C@@H](CO)O)O)O	0.133743	-0.808543	0.026082	0.621444	0.0151222	0.951118	IMPC_ABR_006_001___1 point	Auditory Brain Stem Response	12kHz-evoked ABR Threshold	IMPC_ABR_006_001	20	20	8	8	significant	Significant only in female	IMPC_ABR_006_001	_004_15
84	ONLI_0100	gctof	Tricarboxylic acids and derivatives	citric acid	KRKNYBCHXYNGOX-UHFFFAOYSA-N	311	C(C(=O)O)C(CC(=O)O)(C(=O)O)O	0.387068	0.730297	0.039123	0.13857	0.0396598	0.926719	IMPC_ABR_006_001___1 point	Auditory Brain Stem Response	12kHz-evoked ABR Threshold	IMPC_ABR_006_001	20	20	8	8	significant	Significant only in female	IMPC_ABR_006_001	_004_16
1211	ONLI_0168	CSHPOS	Phosphatidylcholines	PC36:1	ATHVAWFAEPLPPQ-VRDBWYNSSA-N	24778825	CCCCCCCCCCCCCCCCCC(=O)OC[C@H](COP(=O)([O-])OCC[N+](C)(C)C)OC(=O)CCCCCCC/C=C\CCCCCCCC	0.119582	-0.76942	-0.13041	0.659129	0.0255925	0.758239	IMPC_ABR_006_001___1 point	Auditory Brain Stem Response	12kHz-evoked ABR Threshold	IMPC_ABR_006_001	20	20	8	8	significant	Significant only in female	IMPC_ABR_006_001	_004_18
126	ONLI_0173	CSHPOS	Triacylglycerols	TAG 53:1; TAG 17:0-18:0-18:1;	BHJLNGDWUXQOBH-QOCHGBHMSA-N	138126516	CCCCCCCCCCCCCCCCCC(=O)OC(COC(=O)CCCCCCCCCCCCCCCC)COC(=O)CCCCCCCCC/C=C\CCCCCC	0.257844	-0.833238	0.182574	0.373465	0.0393955	0.665205	IMPC_ABR_006_001___1 point	Auditory Brain Stem Response	12kHz-evoked ABR Threshold	IMPC_ABR_006_001	16	20	8	8	significant	Significant only in female	IMPC_ABR_006_001	_004_19
1331	ONLI_0181	CSHPOS	Phosphatidylcholines	PC36:3 A	BXRLDROZWDUSGM-ZRYFCQOPSA-N	24778937	CCCCCCCC/C=C\CCCCCCCC(=O)OC[C@H](COP(=O)([O-])OCC[N+](C)(C)C)OC(=O)CCCC/C=C\C/C=C\CCCCCCCC	0.105421	-0.76942	-0.182574	0.697599	0.0255925	0.665205	IMPC_ABR_006_001___1 point	Auditory Brain Stem Response	12kHz-evoked ABR Threshold	IMPC_ABR_006_001	20	20	8	8	significant	Significant only in female	IMPC_ABR_006_001	_004_21
145	ONLI_0193	CSHPOS	Sphingomyelins	SMd42:2	DACOGJMBYLZYDH-GXJPFUDISA-N	52931217	CCCCCCCCCCCCCCCCCCCCCCCC(=O)N[C@@H](COP(=O)([O-])OCC[N+](C)(C)C)[C@@H](/C=C/CCCCCCCC/C=C\CCC)O	0.355599	0.821584	-0.143451	0.176472	0.0123664	0.734696	IMPC_ABR_006_001___1 point	Auditory Brain Stem Response	12kHz-evoked ABR Threshold	IMPC_ABR_006_001	20	20	8	8	significant	Significant only in female	IMPC_ABR_006_001	_004_22
1521	ONLI_0200	CSHPOS	Triacylglycerols	TAG 50:3; TAG 16:0-16:1-18:2;	HDFLQJUGWGNORO-NSVHLBAISA-N	131750350	CCCCCCCCCCCCCCCC(=O)OC[C@@H](COC(=O)CCCCCCC/C=C\C/C=C\CCCCC)OC(=O)CCCCCCC/C=C\CCCCCC	0.298955	-0.717256	0.365148	0.26068	0.0452038	0.373771	IMPC_ABR_006_001___1 point	Auditory Brain Stem Response	12kHz-evoked ABR Threshold	IMPC_ABR_006_001	20	20	8	8	significant	Significant only in female	IMPC_ABR_006_001	_004_23
1711	ONLI_0222	CSHPOS	Cholesteryl esters	CE (18:3)	FYMCIBHUFSIWCE-KNWYFNKZSA-N	131801659	CC/C=C\C/C=C\C/C=C\CCCCCCCC(=O)O[C@H]1CC[C@@]2(C3CC[C@]4(C(C3CC=C2C1)CCC4[C@H](C)CCCC(C)C)C)C	0.210842	-0.808543	0	0.433141	0.0151222	1	IMPC_ABR_006_001___1 point	Auditory Brain Stem Response	12kHz-evoked ABR Threshold	IMPC_ABR_006_001	20	20	8	8	significant	Significant only in female	IMPC_ABR_006_001	_004_24
1811	ONLI_0232	CSHPOS	Triacylglycerols	TAG 52:6; TAG 16:0-16:1-20:5;	CCDSJNBGVOSHIH-OFLVPTCNSA-N	131755156	CCCCCCCCCCCCCCCC(=O)OC[C@@H](COC(=O)CCC/C=C\C/C=C\C/C=C\C/C=C\C/C=C\CC)OC(=O)CCCCCCC/C=C\CCCCCC	0.297382	-0.717256	0.547723	0.26332	0.0452038	0.159931	IMPC_ABR_006_001___1 point	Auditory Brain Stem Response	12kHz-evoked ABR Threshold	IMPC_ABR_006_001	20	20	8	8	significant	Significant only in female	IMPC_ABR_006_001	_004_26
188	ONLI_0239	CSHPOS	Triacylglycerols	TAG 58:1; TAG 18:0-18:1-22:0;	HTEKPEUBHXJJTE-VIQUSSKHSA-N	131755932	CCCCCCCCCCCCCCCCCCCCCC(=O)OC[C@H](COC(=O)CCCCCCCCCCCCCCCCC)OC(=O)CCCCCCCCC/C=C\CCCCCC	0.257844	-0.833238	0.182574	0.373465	0.0393955	0.665205	IMPC_ABR_006_001___1 point	Auditory Brain Stem Response	12kHz-evoked ABR Threshold	IMPC_ABR_006_001	17	20	8	8	significant	Significant only in female	IMPC_ABR_006_001	_004_27
192	ONLI_0244	CSHPOS	Triacylglycerols	TAG 54:2; TAG 18:0-18:1-18:1;	RYNHWWNZNIGDAQ-WNMJAFDRSA-N	42627601	CCCCCCCCCCCCCCCCCC(=O)OC[C@@H](COC(=O)CCCCCCC/C=C\CCCCCCCC)OC(=O)CCCCCCC/C=C\CCCCCCCC	0.195108	-0.730297	0.0912871	0.468987	0.0396598	0.829785	IMPC_ABR_006_001___1 point	Auditory Brain Stem Response	12kHz-evoked ABR Threshold	IMPC_ABR_006_001	20	20	8	8	significant	Significant only in female	IMPC_ABR_006_001	_004_28
2121	ONLI_0266	CSHPOS	Triacylglycerols	TAG 49:3; TAG 15:0-16:1-18:2;	CQSXCZMDDSQLAG-RLFYQNGLSA-N	131754333	CCCCCCCCCCCCCCC(=O)OC[C@@H](COC(=O)CCCCCCC/C=C\C/C=C\CCCCC)OC(=O)CCCCCCC/C=C\CCCCCC	0.232417	-0.848668	0.456435	0.404528	0.0157445	0.255618	IMPC_ABR_006_001___1 point	Auditory Brain Stem Response	12kHz-evoked ABR Threshold	IMPC_ABR_006_001	19	20	8	8	significant	Significant only in female	IMPC_ABR_006_001	_004_29
214	ONLI_0268	CSHPOS	Triacylglycerols	TAG 58:2; TAG 18:0-18:2-22:0;	VTHDNMHRPKXWMZ-WMMWWMJFSA-N	131756084	CCCCCCCCCCCCCCCCCCCCCC(=O)OC[C@H](COC(=O)CCCCCCCCCCCCCCCCC)OC(=O)CCCCCCC/C=C\C/C=C\CCCCC	0.0845154	-0.92582	-0.0912871	0.764585	0.00276496	0.829785	IMPC_ABR_006_001___1 point	Auditory Brain Stem Response	12kHz-evoked ABR Threshold	IMPC_ABR_006_001	19	20	8	8	significant	Significant only in female	IMPC_ABR_006_001	_004_30
2151	ONLI_0269	CSHPOS	Triacylglycerols	TAG 46:0; TAG 14:0-16:0-16:0;	JWVXCFSNEOMSHH-DXQCBLCSSA-N	91867460	CCCCCCCCCCCCCCCC(=O)OC[C@H](COC(=O)CCCCCCCCCCCCC)OC(=O)CCCCCCCCCCCCCCC	0.0629379	-0.808543	0.182574	0.816881	0.0151222	0.665205	IMPC_ABR_006_001___1 point	Auditory Brain Stem Response	12kHz-evoked ABR Threshold	IMPC_ABR_006_001	20	20	8	8	significant	Significant only in female	IMPC_ABR_006_001	_004_31
2171	ONLI_0271	CSHPOS	Ceramides	Cer d40:1	CJROVRTUSFQVMR-GVOPMEMSSA-N	5283570	CCCCCCCCCCCCCCCCCCCCCCCCCC(=O)N[C@@H](CO)[C@@H](/C=C/CCCCCCCCCCCCC)O	0.118009	-0.821584	-0.234738	0.663366	0.0123664	0.575767	IMPC_ABR_006_001___1 point	Auditory Brain Stem Response	12kHz-evoked ABR Threshold	IMPC_ABR_006_001	20	20	8	8	significant	Significant only in female	IMPC_ABR_006_001	_004_32
219	ONLI_0273	CSHPOS	Triacylglycerols	TAG 58:0; TAG 18:0-18:0-22:0;	KFFURWDSOSXFNL-XKJQNMSGSA-N	131755786	CCCCCCCCCCCCCCCCCCCCCC(=O)OC[C@H](COC(=O)CCCCCCCCCCCCCCCCC)OC(=O)CCCCCCCCCCCCCCCCC	0.300892	-0.866025	0.0912871	0.275821	0.0117248	0.829785	IMPC_ABR_006_001___1 point	Auditory Brain Stem Response	12kHz-evoked ABR Threshold	IMPC_ABR_006_001	17	18	8	8	significant	Significant only in female	IMPC_ABR_006_001	_004_34
2502	ONLI_0308	CSHPOS	Cholesteryl esters	CE (20:3)	MLPRJPSMAFZPLA-PJSAOELNSA-N	53477892	CCCCC/C=C\C/C=C\C/C=C\CCCCCCC(=O)O[C@H]1CC[C@@]2(C3CC[C@]4(C(C3CC=C2C1)CCC4[C@H](C)CCCC(C)C)C)C	0.118009	-0.808543	0.026082	0.663366	0.0151222	0.951118	IMPC_ABR_006_001___1 point	Auditory Brain Stem Response	12kHz-evoked ABR Threshold	IMPC_ABR_006_001	20	20	8	8	significant	Significant only in female	IMPC_ABR_006_001	_004_36
269	ONLI_0328	CSHPOS	Triacylglycerols	TAG 54:5; TAG 18:0-18:2-18:3;	FOOVNYMOCOZYCS-FEJMAITCSA-N	131756093	CCCCCCCCCCCCCCCCCC(=O)OC[C@@H](COC(=O)CCCC/C=C\C/C=C\C/C=C\CCCCC)OC(=O)CCCCCCC/C=C\C/C=C\CCCCC	0.031469	-0.730297	0.182574	0.907896	0.0396598	0.665205	IMPC_ABR_006_001___1 point	Auditory Brain Stem Response	12kHz-evoked ABR Threshold	IMPC_ABR_006_001	20	20	8	8	significant	Significant only in female	IMPC_ABR_006_001	_004_39
2721	ONLI_0331	CSHPOS	1,2-diacylglycerols	DAG 24:0; DAG 12:0-12:0;	OQQOAWVKVDAJOI-UHFFFAOYSA-N	33979	CCCCCCCCCCCC(=O)OCC(CO)OC(=O)CCCCCCCCCCC	-0.0582176	-0.821584	0.026082	0.830422	0.0123664	0.951118	IMPC_ABR_006_001___1 point	Auditory Brain Stem Response	12kHz-evoked ABR Threshold	IMPC_ABR_006_001	20	20	8	8	significant	Significant only in female	IMPC_ABR_006_001	_004_41
274	ONLI_0333	CSHPOS	Triacylglycerols	TAG 56:1; TAG 16:0-18:1-22:0;	OZXLEWFIONDQJM-SKYDHSLNSA-N	131755163	CCCCCCCCCCCCCCCCCCCCCC(=O)OC[C@H](COC(=O)CCCCCCCCCCCCCCC)OC(=O)CCCCCCCCC/C=C\CCCCCC	0.248814	-0.776899	0	0.371197	0.0398774	1	IMPC_ABR_006_001___1 point	Auditory Brain Stem Response	12kHz-evoked ABR Threshold	IMPC_ABR_006_001	18	20	8	8	significant	Significant only in female	IMPC_ABR_006_001	_004_42
2831	ONLI_0342	CSHPOS	Phosphatidylcholines	PC34:0	PZNPLUBHRSSFHT-RRHRGVEJSA-N	24778686	CCCCCCCCCCCCCCCCCC(=O)O[C@H](COC(=O)CCCCCCCCCCCCCCC)COP(=O)([O-])OCC[N+](C)(C)C	-0.4563	-0.730297	-0.156492	0.0756434	0.0396598	0.711333	IMPC_ABR_006_001___1 point	Auditory Brain Stem Response	12kHz-evoked ABR Threshold	IMPC_ABR_006_001	20	20	8	8	significant	Significant only in female	IMPC_ABR_006_001	_004_45
2991	ONLI_0359	CSHPOS	Cholesteryl esters	CE (20:2)	REFJKOQDWJELKE-NJJZEKHRSA-N	53477891	CCCCC/C=C\C/C=C\CCCCCCCCCC(=O)O[C@H]1CC[C@@]2(C3CC[C@]4(C(C3CC=C2C1)CCC4[C@H](C)CCCC(C)C)C)C	-0.00472034	-0.76942	-0.404271	0.986158	0.0255925	0.320532	IMPC_ABR_006_001___1 point	Auditory Brain Stem Response	12kHz-evoked ABR Threshold	IMPC_ABR_006_001	20	20	8	8	significant	Significant only in female	IMPC_ABR_006_001	_004_46
3121	ONLI_0373	CSHPOS	Phosphatidylcholines	PC 36:2	SNKAWJBJQDLSFF-NVKMUCNASA-N	10350317	CCCCCCCC/C=C\CCCCCCCC(=O)OC[C@H](COP(=O)([O-])OCC[N+](C)(C)C)OC(=O)CCCCCCC/C=C\CCCCCCCC	-0.0409096	-0.730297	-0.13041	0.880428	0.0396598	0.758239	IMPC_ABR_006_001___1 point	Auditory Brain Stem Response	12kHz-evoked ABR Threshold	IMPC_ABR_006_001	20	20	8	8	significant	Significant only in female	IMPC_ABR_006_001	_004_48
347	ONLI_0409	CSHPOS	Triacylglycerols	TAG 54:5; TAG 16:0-18:1-20:4;	WKSLEDJKCJNITP-AHQIBYCWSA-N	131755177	CCCCCCCCCCCCCCCC(=O)OC[C@@H](COC(=O)CCC/C=C\C/C=C\C/C=C\C/C=C\CCCCC)OC(=O)CCCCCCCCC/C=C\CCCCCC	-0.0566441	-0.730297	0.0912871	0.834945	0.0396598	0.829785	IMPC_ABR_006_001___1 point	Auditory Brain Stem Response	12kHz-evoked ABR Threshold	IMPC_ABR_006_001	20	20	8	8	significant	Significant only in female	IMPC_ABR_006_001	_004_51
3531	ONLI_0415	CSHPOS	Triacylglycerols	TAG 51:5; TAG 15:0-18:2-18:3;	VEGWTLAYXMHOLL-HHBBQONFSA-N	131754537	CCCCCCCCCCCCCCC(=O)OC[C@@H](COC(=O)CCCCCCC/C=C\C/C=C\C/C=C\CC)OC(=O)CCCCCCC/C=C\C/C=C\CCCCC	0.105644	-0.848668	0.456435	0.707873	0.0157445	0.255618	IMPC_ABR_006_001___1 point	Auditory Brain Stem Response	12kHz-evoked ABR Threshold	IMPC_ABR_006_001	19	20	8	8	significant	Significant only in female	IMPC_ABR_006_001	_004_53
3691	ONLI_0432	CSHPOS	Cholesteryl esters	CE (20:5)	XZFUGMCJZFRBKF-JIKDAPOUSA-N	53477889	CC/C=C\C/C=C\C/C=C\C/C=C\C/C=C\CCCC(=O)O[C@H]1CC[C@@]2(C3CC[C@]4(C(C3CC=C2C1)CCC4[C@H](C)CCCC(C)C)C)C	0.154198	-0.808543	0.026082	0.568551	0.0151222	0.951118	IMPC_ABR_006_001___1 point	Auditory Brain Stem Response	12kHz-evoked ABR Threshold	IMPC_ABR_006_001	20	20	8	8	significant	Significant only in female	IMPC_ABR_006_001	_004_55
371	ONLI_0434	CSHPOS	Triacylglycerols	TAG 47:1; TAG 15:0-16:0-16:1;	RCYIETYFTUBXFK-KWLHUJJFSA-N	131754159	CCCCCCCCCCCCCCCC(=O)O[C@@H](COC(=O)CCCCCCCCCCCCCC)COC(=O)CCCCCCC/C=C\CCCCCC	0.211289	-0.92582	0.273861	0.449696	0.00276496	0.511607	IMPC_ABR_006_001___1 point	Auditory Brain Stem Response	12kHz-evoked ABR Threshold	IMPC_ABR_006_001	18	19	8	8	significant	Significant only in female	IMPC_ABR_006_001	_004_56
399	ONLI_0476	CSHNEG	Long-chain fatty acids	FA 15:0	WQEPLUUGTLDZJY-UHFFFAOYSA-N	13849	CCCCCCCCCCCCCCC(=O)O	0.448433	0.76942	0.039123	0.0814846	0.0255925	0.926719	IMPC_ABR_006_001___1 point	Auditory Brain Stem Response	12kHz-evoked ABR Threshold	IMPC_ABR_006_001	20	20	8	8	significant	Significant only in female	IMPC_ABR_006_001	_004_61
440	ONLI_0541	CSHNEG	Ceramides	Cer-NDS d41:0; Cer-NDS d18:0/23:0;	FTSDYFFYZJTACJ-IOLBBIBUSA-N	53481049	CCCCCCCCCCCCCCCCCCCCCCC(=O)N[C@@H](CO)[C@@H](CCCCCCCCCCCCCCC)O	-0.423257	-0.730297	-0.0652051	0.102353	0.0396598	0.878087	IMPC_ABR_006_001___1 point	Auditory Brain Stem Response	12kHz-evoked ABR Threshold	IMPC_ABR_006_001	20	20	8	8	significant	Significant only in female	IMPC_ABR_006_001	_004_64
4471	ONLI_0549	CSHNEG	Ceramides	Cer-NS d43:1; Cer-NS d19:1/24:0;	KSYIVRBEJSMJMX-PVNBSDFKSA-N	134745021	CCCCCCCCCCCCCCCCCCCCCCCC(=O)N[C@@H](CO)[C@@H](/C=C/CCCCCCCCCCCCCC)O	-0.26906	-0.821584	0.326025	0.313609	0.0123664	0.430639	IMPC_ABR_006_001___1 point	Auditory Brain Stem Response	12kHz-evoked ABR Threshold	IMPC_ABR_006_001	20	20	8	8	significant	Significant only in female	IMPC_ABR_006_001	_004_65
449	ONLI_0551	CSHNEG	Phytoceramides	Cer-NP t42:0; Cer-NP t18:0/24:0;	ZESJDNWGTANZCC-UHYFRKBVSA-N	129678169	[2H]CCCCCCCCCCCCCCCCCCCCCCCC(=O)N[C@@H](CO)[C@@H]([C@@H](CCCCCCCCCCCCCC)O)O	0.0298955	-0.730297	0.182574	0.912484	0.0396598	0.665205	IMPC_ABR_006_001___1 point	Auditory Brain Stem Response	12kHz-evoked ABR Threshold	IMPC_ABR_006_001	20	20	8	8	significant	Significant only in female	IMPC_ABR_006_001	_004_66
462	ONLI_0567	CSHNEG	1-alkyl,2-acylglycerophosphoethanolamines	PE 38:4e; PE 18:0e/20:4;	LRBBGQHIVCMVRY-PQNGYSQDSA-N	52925027	CCCCCCCCCCCCCCCCCCOC[C@H](COP(=O)(O)OCCN)OC(=O)CCC/C=C\C/C=C\C/C=C\C/C=C\CCCCC	-0.116435	-0.912871	0.182574	0.667613	0.00154742	0.665205	IMPC_ABR_006_001___1 point	Auditory Brain Stem Response	12kHz-evoked ABR Threshold	IMPC_ABR_006_001	20	20	8	8	significant	Significant only in female	IMPC_ABR_006_001	_004_68
4721	ONLI_0577	CSHNEG	1-alkyl,2-acylglycerophosphoethanolamines	PE 40:6e; PE 18:0e/22:6;	CFLIAMAPAOTPGM-AOXDHDBISA-N	52923729	CCCCCCCCCCCCCCCCCCOC[C@H](COP(=O)(O)OCCN)OC(=O)CC/C=C\C/C=C\C/C=C\C/C=C\C/C=C\C/C=C\CC	-0.0944069	-0.730297	0.026082	0.72801	0.0396598	0.951118	IMPC_ABR_006_001___1 point	Auditory Brain Stem Response	12kHz-evoked ABR Threshold	IMPC_ABR_006_001	20	20	8	8	significant	Significant only in female	IMPC_ABR_006_001	_004_73
475	ONLI_0580	CSHNEG	1-(1Z-alkenyl),2-acylglycerophosphoethanolamines	PE 40:5e; PE 18:0e/22:5;	QIJJGYHBXLEBJV-MVCMTJSTSA-N	53480858	CCCCCCCCCCCCCCCC/C=C\OC[C@H](COP(=O)(O)OCCN)OC(=O)CCCCC/C=C\C/C=C\C/C=C\C/C=C\C/C=C\CC	0.0267486	-0.821584	0.0782461	0.921669	0.0123664	0.853886	IMPC_ABR_006_001___1 point	Auditory Brain Stem Response	12kHz-evoked ABR Threshold	IMPC_ABR_006_001	20	20	8	8	significant	Significant only in female	IMPC_ABR_006_001	_004_74
488	ONLI_0596	CSHNEG	1-alkyl,2-acylglycerophosphoethanolamines	PC 34:1e; PC 16:0e/18:1;	JJGMGPGKWYLISM-NPBIGWJUSA-N	42607455	CCCCCCCCCCCCCCCCOC[C@H](COP(=O)(O)OCCN)OC(=O)CCCCCCC/C=C\CCCCCCCC	0.626232	0.730297	0.234738	0.00944918	0.0396598	0.575767	IMPC_ABR_006_001___1 point	Auditory Brain Stem Response	12kHz-evoked ABR Threshold	IMPC_ABR_006_001	20	20	8	8	significant	Significant only in female	IMPC_ABR_006_001	_004_76
4921	ONLI_0600	CSHNEG	Phosphatidylcholines	PC 34:3	CNNSEHUKQJCGTE-UPPWDXJYSA-N	24778699	CCCCCCCCCCCCCCCC(=O)OC[C@H](COP(=O)([O-])OCC[N+](C)(C)C)OC(=O)CCCC/C=C\C/C=C\C/C=C\CCCCC	0.188814	-0.730297	0.104328	0.483721	0.0396598	0.8058	IMPC_ABR_006_001___1 point	Auditory Brain Stem Response	12kHz-evoked ABR Threshold	IMPC_ABR_006_001	20	20	8	8	significant	Significant only in female	IMPC_ABR_006_001	_004_77
503	ONLI_0614	CSHNEG	Phosphatidylinositols	PI 34:2; PI 16:0-18:2;	BSNJSZUDOMPYIR-YBCFFXQBSA-N	46891796	CCCCCCCCCCCCCCCC(=O)OC[C@H](COP(=O)(O)OC1C([C@@H](C(C(C1O)O)O)O)O)OC(=O)CCCCCCC/C=C\C/C=C\CCCCC	0.173079	-0.730297	0.143451	0.521507	0.0396598	0.734696	IMPC_ABR_006_001___1 point	Auditory Brain Stem Response	12kHz-evoked ABR Threshold	IMPC_ABR_006_001	20	20	8	8	significant	Significant only in female	IMPC_ABR_006_001	_004_81
5041	ONLI_0615	CSHNEG	Phosphatidylinositols	PI 34:1; PI 16:0-18:1;	PDLAMJKMOKWLAJ-PVPULFMTSA-N	5771758	CCCCCCCCCCCCCCCC(=O)OC[C@H](COP(=O)(O)OC1C([C@@H](C(C(C1O)O)O)O)O)OC(=O)CCCCCCC/C=C\CCCCCCCC	0.173079	-0.730297	0.365148	0.521507	0.0396598	0.373771	IMPC_ABR_006_001___1 point	Auditory Brain Stem Response	12kHz-evoked ABR Threshold	IMPC_ABR_006_001	20	20	8	8	significant	Significant only in female	IMPC_ABR_006_001	_004_82
5131	ONLI_0628	CSHNEG	Phosphatidylinositols	PI 35:2; PI 17:0-18:2;	AJAKJCJJRMUWFW-WNEYDAEMSA-N	52927654	CCCCCCCCCCCCCCCCC(=O)OC[C@H](COP(=O)(O)OC1C([C@@H](C(C(C1O)O)O)O)O)OC(=O)CCCCCCC/C=C\C/C=C\CCCCC	0.157345	-0.730297	0.182574	0.560587	0.0396598	0.665205	IMPC_ABR_006_001___1 point	Auditory Brain Stem Response	12kHz-evoked ABR Threshold	IMPC_ABR_006_001	20	20	8	8	significant	Significant only in female	IMPC_ABR_006_001	_004_85
515	ONLI_0631	CSHNEG	Phosphatidylcholines	PC 38:6e; PC 18:2e/20:4;	ZZSZQATYGVHNLZ-PUMLCSCDSA-N	24778979	CCCCC/C=C\C/C=C\CCCCCCCC(=O)OC[C@H](COP(=O)([O-])OCC[N+](C)(C)C)OC(=O)CCC/C=C\C/C=C\C/C=C\C/C=C\CCCCC	0.18252	0.730297	-0.599887	0.498675	0.0396598	0.115927	IMPC_ABR_006_001___1 point	Auditory Brain Stem Response	12kHz-evoked ABR Threshold	IMPC_ABR_006_001	20	20	8	8	significant	Significant only in female	IMPC_ABR_006_001	_004_86
517	ONLI_0633	CSHNEG	Phosphatidylcholines	PC 37:4; PC 17:0-20:4;	MHUZXLUKTLNHIX-GUNPMBPGSA-N	24778518	CCCCCCCCCCCCCCCCC(=O)OC[C@H](COP(=O)([O-])OCC[N+](C)(C)C)OC(=O)CCC/C=C\C/C=C\C/C=C\C/C=C\CCCCC	0.382348	0.730297	-0.378189	0.143865	0.0396598	0.355608	IMPC_ABR_006_001___1 point	Auditory Brain Stem Response	12kHz-evoked ABR Threshold	IMPC_ABR_006_001	20	20	8	8	significant	Significant only in female	IMPC_ABR_006_001	_004_88
5221	ONLI_0641	CSHNEG	Phosphatidylinositols	PI 36:3; PI 18:1-18:2;	MXJMOLQIXMJUEL-PEAJWMICSA-N	52928384	CCCCCCCC/C=C\CCCCCCCC(=O)OC[C@H](COP(=O)(O)OC1C([C@@H](C(C(C1O)O)O)O)O)OC(=O)CCCCCCC/C=C\C/C=C\CCCCC	0.176226	-0.912871	0	0.513844	0.00154742	1	IMPC_ABR_006_001___1 point	Auditory Brain Stem Response	12kHz-evoked ABR Threshold	IMPC_ABR_006_001	20	20	8	8	significant	Significant only in female	IMPC_ABR_006_001	_004_89
5241	ONLI_0644	CSHNEG	Phosphatidylinositols	PI 36:2; PI 18:0-18:2;	KZVRAFHIKMDULK-LNVBWDHHSA-N	52928409	CCCCCCCCCCCCCCCCCC(=O)OC[C@H](COP(=O)(O)OC1C([C@@H](C(C(C1O)O)O)O)O)OC(=O)CCCCCCC/C=C\C/C=C\CCCCC	0.140037	-0.730297	0.182574	0.604967	0.0396598	0.665205	IMPC_ABR_006_001___1 point	Auditory Brain Stem Response	12kHz-evoked ABR Threshold	IMPC_ABR_006_001	20	20	8	8	significant	Significant only in female	IMPC_ABR_006_001	_004_90
534	ONLI_0656	CSHNEG	Sphingomyelins	SM d42:3; SM d18:2/24:1;	TXFLWJQVQCDUDZ-BRUGZULGSA-N	52931215	CCCCCCCC/C=C\CCCCCCCCCCCCCC(=O)N[C@@H](COP(=O)([O-])OCC[N+](C)(C)C)[C@@H](/C=C/CCCCCCCC/C=C\CCC)O	0.509797	0.860707	0.208656	0.0436641	0.00607042	0.619977	IMPC_ABR_006_001___1 point	Auditory Brain Stem Response	12kHz-evoked ABR Threshold	IMPC_ABR_006_001	20	20	8	8	significant	Significant only in female	IMPC_ABR_006_001	_004_91
5391	ONLI_0663	CSHNEG	Phosphatidylcholines	PC 38:1; PC 20:0-18:1;	IKNYBQRADNMEDT-FHLWKLDVSA-N	24779038	CCCCCCCCCCCCCCCCCCCC(=O)OC[C@H](COP(=O)([O-])OCC[N+](C)(C)C)OC(=O)CCCCCCC/C=C\CCCCCCCC	0.13689	-0.860707	-0.195615	0.613184	0.00607042	0.642471	IMPC_ABR_006_001___1 point	Auditory Brain Stem Response	12kHz-evoked ABR Threshold	IMPC_ABR_006_001	20	20	8	8	significant	Significant only in female	IMPC_ABR_006_001	_004_93
583	ONLI_0745	HILICPOS	Dipeptides	Leu-Pro	VTJUNIYRYIAIHF-IUCAKERBSA-N	80817	CC(C)C[C@@H](C(=O)N1CCC[C@H]1C(=O)O)N	0.157345	0.821584	-0.365148	0.560587	0.0123664	0.373771	IMPC_ABR_006_001___1 point	Auditory Brain Stem Response	12kHz-evoked ABR Threshold	IMPC_ABR_006_001	20	20	8	8	significant	Significant only in female	IMPC_ABR_006_001	_004_101
5871	ONLI_0750	HILICPOS	Dipeptides	Lys-Val	YQAIUOWPSUOINN-UHFFFAOYSA-N	140709	CC(C)C(C(=O)O)NC(=O)C(CCCCN)N	0.316263	0.860707	-0.0912871	0.232724	0.00607042	0.829785	IMPC_ABR_006_001___1 point	Auditory Brain Stem Response	12kHz-evoked ABR Threshold	IMPC_ABR_006_001	20	20	8	8	significant	Significant only in female	IMPC_ABR_006_001	_004_103
608	ONLI_0788	HILICPOS	Purine nucleosides	1-Methyladenosine	GFYLSDSUCHVORB-IOSLPCCCSA-N	27476	CN1C=NC2=C(C1=N)N=CN2[C@H]3[C@@H]([C@@H]([C@H](O3)CO)O)O	-0.0676583	0.821584	-0.0912871	0.803388	0.0123664	0.829785	IMPC_ABR_006_001___1 point	Auditory Brain Stem Response	12kHz-evoked ABR Threshold	IMPC_ABR_006_001	20	20	8	8	significant	Significant only in female	IMPC_ABR_006_001	_004_107
616	ONLI_0801	HILICPOS	Alpha amino acids and derivatives	Creatinine	DDRJAANPRJIHGJ-UHFFFAOYSA-N	588	CN1CC(=O)N=C1N	0.0818193	0.730297	0.013041	0.763236	0.0396598	0.975551	IMPC_ABR_006_001___1 point	Auditory Brain Stem Response	12kHz-evoked ABR Threshold	IMPC_ABR_006_001	20	20	8	8	significant	Significant only in female	IMPC_ABR_006_001	_004_108
619	ONLI_0807	HILICPOS	Purine nucleosides	N2,N2-Dimethylguanosine	RSPURTUNRHNVGF-IOSLPCCCSA-N	135501639	CN(C)C1=NC2=C(C(=O)N1)N=CN2[C@H]3[C@@H]([C@@H]([C@H](O3)CO)O)O	0.359191	0.810093	-0.026082	0.188559	0.0271726	0.951118	IMPC_ABR_006_001___1 point	Auditory Brain Stem Response	12kHz-evoked ABR Threshold	IMPC_ABR_006_001	19	20	8	8	significant	Significant only in female	IMPC_ABR_006_001	_004_109
6242	ONLI_0812	HILICPOS	Leucine and derivatives	N-Methylleucine	XJODGRWDFZVTKW-LURJTMIESA-N	2777993	CC(C)C[C@@H](C(=O)O)NC	-0.660848	-0.730297	-0.417312	0.00531906	0.0396598	0.303637	IMPC_ABR_006_001___1 point	Auditory Brain Stem Response	12kHz-evoked ABR Threshold	IMPC_ABR_006_001	20	20	8	8	significant	Significant only in female	IMPC_ABR_006_001	_004_111
640	ONLI_0835	HILICPOS	L-alpha-amino acids	Arginine	ODKSFYDXXFIFQN-BYPYZUCNSA-N	6322	C(C[C@@H](C(=O)O)N)CN=C(N)N	-0.717492	-0.730297	-0.299943	0.00175345	0.0396598	0.470427	IMPC_ABR_006_001___1 point	Auditory Brain Stem Response	12kHz-evoked ABR Threshold	IMPC_ABR_006_001	20	20	8	8	significant	Significant only in female	IMPC_ABR_006_001	_004_115
672	ONLI_0877	HILICPOS	Nicotinamides	Nicotinamide	DFPAKSUCGFBDDF-UHFFFAOYSA-N	936	C1=CC(=CN=C1)C(=O)N	-0.361893	-0.76942	-0.0521641	0.168397	0.0255925	0.90237	IMPC_ABR_006_001___1 point	Auditory Brain Stem Response	12kHz-evoked ABR Threshold	IMPC_ABR_006_001	20	20	8	8	significant	Significant only in female	IMPC_ABR_006_001	_004_120
704	ONLI_0936	HILICNEG	Hydroxyeicosatetraenoic acids	5,8,11,14-Eicosatetraenoic acid, 16-hydroxy-, 5Z,8Z,11Z,14Z,16R-	JEKNPVYFNMZRJG-STHMYGMFSA-N	9548884	CCCC[C@H](/C=C\C/C=C\C/C=C\C/C=C\CCCC(=O)O)O	-0.339865	-0.821584	0.013041	0.197769	0.0123664	0.975551	IMPC_ABR_006_001___1 point	Auditory Brain Stem Response	12kHz-evoked ABR Threshold	IMPC_ABR_006_001	20	19	8	8	significant	Significant only in female	IMPC_ABR_006_001	_004_126
715	ONLI_0989	HILICNEG	N-acyl-alpha amino acids	Hexanoylglycine	UPCKIPHSXMXJOX-UHFFFAOYSA-N	99463	CCCCCC(=O)NCC(=O)O	-0.22815	-0.730297	-0.456435	0.395401	0.0396598	0.255618	IMPC_ABR_006_001___1 point	Auditory Brain Stem Response	12kHz-evoked ABR Threshold	IMPC_ABR_006_001	20	19	8	8	significant	Significant only in female	IMPC_ABR_006_001	_004_127
718	ONLI_1000	HILICNEG	Short-chain keto acids and derivatives	Ketoisovaleric acid	QHKABHOOEWYVLI-UHFFFAOYSA-N	49	CC(C)C(=O)C(=O)O	-0.328851	-0.912871	0.0652051	0.213629	0.00154742	0.878087	IMPC_ABR_006_001___1 point	Auditory Brain Stem Response	12kHz-evoked ABR Threshold	IMPC_ABR_006_001	20	19	8	8	significant	Significant only in female	IMPC_ABR_006_001	_004_129
733	ONLI_1051	HILICNEG	Pyrimidine 2'-deoxyribonucleosides	Thymidine	IQFYYKKMVGJFEH-XLPZGREQSA-N	5789	CC1=CN(C(=O)NC1=O)[C@H]2C[C@@H]([C@H](O2)CO)O	-0.330424	-0.717256	0.0652051	0.211315	0.0452038	0.878087	IMPC_ABR_006_001___1 point	Auditory Brain Stem Response	12kHz-evoked ABR Threshold	IMPC_ABR_006_001	20	19	8	8	significant	Significant only in female	IMPC_ABR_006_001	_004_130
[truncated: 19,402 more rows]

## Sheet: sampel size>14
Notes	Metabolite_label	Assay	Metabolite_class	Compound Name	InChiKeys	Pubchem ID	SMILES	exponential tranformed correlation coefficient			correlation coefficients for combining sex(both), for female(f), for male(m)			Correlation pvalues for combining sex(both), for female(f), for male(m)			Phenotype_label	Procedure_name	Phenotype_name	number of female WT mice for this Metabolite	number of male WT mice for this Metabolite	number of female WT mice for this phenotype	number of male WT mice for this phenotype	classify assignificant if correlation P <0.05	class of significant correlation	Simple label	Order
[truncated: 26,314 more rows]

[truncated: 3 more sheets: Tranformed correlation results, Phenotype abbreviation, Metabolite abbreviation]
